# Supplementary material for: Proteomic analysis of mesenchymal stromal cells secretome in comparison to leukocyte- and platelet-rich fibrin
Source: Research Square preprint supplement (doi:10.21203/rs.3.rs-2917479/v1), 2023-05-17
Supplement: Supplementary file 2 [file 7eaed87a302fcc20591d4c36.docx]

‘Common proteins’ indicate those identified in both BMSC-CM and LPRF-CM (*p* > 0.05); ‘Upregulated proteins’ indicate those among the commonly identified proteins upregulated in BMSC-CM or LPRF-CM (*p* < 0.05); ‘Exclusive proteins’ indicate those identified only in BMSC-CM or LPRF-CM. * detected only in the multiplex assay. GF, growth factors; ECM, extracellular matrix. Full names of proteins are provided in Supplementary File S2

| **Category** | **Common proteins** |  | **Upregulated proteins** | |  | **Exclusive proteins** | |
| --- | --- | --- | --- | --- | --- | --- | --- |
|  |  |  | **BMSC-CM** | **LPRF-CM** |  | **BMSC-CM** | **LPRF-CM** |
| **GF related** | FGF1*, TGFB1, LTBP1, MST1/ HGFL, MET/HGFR, HGFAC, HGS, CCN5/CTGFL, PDGFRL, PDGFB, PDGFC, PDGFD, IGF2, IGFALS, CLEC11A/SCGF, KITLG/SCF, HDGFL2, EPS15, EPS15L1, MEGF8, ENAM, GPNMB* |  | TGFBI, TGFB2, LTBP2, LTBP4, BMP1, EGFR, IGFBP2, IGFBP3, IGFBP4, IGFBP7, CCN2/CTGF, IGF2R, HDGF, MYDGF, CSF1/MCSF, SDF1/CXCL12 | TGFB1I1, GRB2 |  | TGFBR2, LTBP3, FGF2*, FGF7, FGFRL1, PDGFRA, IGFBP5, CCN1/IGFBP10, CCN3/IGFBP9, EPS8, PTN/ HBNF | EGF, PDGFA |
| **Cell function related** | PA2G4, NECTIN1, NECTIN2, VCL, CCAR1, BCAM, CKAP5, PCNA |  | CTNNB1, CDH11, TUBB4B, TUBB, TUBA1A, TUBB3, TUBA1C, PA2G4, TUBB1, PLEC, SDF2, SDF4, SERPINF1 | PTK2 |  | WNT5A, WNT5B, CCN4/ WISP1, CKAP4, GAP43, CADM1, CDH1, CDH4, CDH13, TUBB2B, TUBB6 | F11R, CHL1 |
| **Angiogen-esis related** | ANG, ANGPT1, ANGPTL4, ANGPTL6, AGT, VASP, ENG, SELE* |  | VEGFC, VCAM1, EPCR/PROCR, SVEP1 | VWF, PECAM1, ECE1 |  | VEGFA, FLT4/VEGFR3, ANGPTL2, EDF1, AAMP | ICAM2, ICAM3, VWA5A |
| **ECM related** | SPP1/OPN, CLEC3B, ECM1, FN1, FBLN1, FBLN5, FAM20C/DMP4, THBS1, GC, HABP2, CRTAP, EFEMP1, EFEMP2, MXRA8, CHSY3 |  | SPARC/ON, SMOC1, POSTN/OSF2, OGN, BGN, DCN, THBS2, THBS5, MMP1, MMP2, MMP3, TIMP1, TIMP2, TIMP3, CCBE1, COLGALT1, ACTL6A, HAPLN1, ARPC1B, COL1A1, COL1A2, COL3A1, COL4A1, COL4A2, COL5A1, COL5A2, COL6A1, COL6A2, COL6A3, COL8A2, COL11A1, COL12A1, COL14A1, LAMA4, LAMB1, LAMB2, LAMC1, LAMC2, VIM, PCOLCE, MXRA5, PLOD1, PLOD2, CEMIP, MYH10 | MMP8, MMP9, CRTAC1 |  | ALPL, OMD, MMP13, MMP14, ARPC1A, HAPLN3, MXRA7, MYH2, COL5A3, COL7A1, COL8A1, COL16A1, CTHRC1, SAFB, SAFB2 | ECM2 |
| **Inflamma-tion/ immune related** | MIF, CCL5/RANTES, CCL18/ MIP4, MARCO, CTSD, LGALSL, LGALS3 |  | CCL2/MCP1, TNFA*, TNFAIP6, IL1RAP, ILF2, TNFRSF11B/OPG, OSTF1, CTSB, CTSZ, CTSL, PTGR1, LGALS1, LGALS3BP, MRC2 | CXCL8, IL6ST, PRG2, ARG1, CD36 |  | IL6, LIF, TNFRSF1A, EDA2R, IKBKG, CTSF, CTSO, PTGES3 | CD14, CD40/ TNFRSF5, CLEC1B, CTSG, CTSS, AIF1, HLA-DRA, TNFRSF14, CXCL5, CLEC2B |

**Table 1: Selected proteins related to wound healing identified in BMSC-CM and/or LPRF-CM**
