# Supplementary material for: Proteomic analysis of mesenchymal stromal cells secretome in comparison to leukocyte- and platelet-rich fibrin
Source: Research Square preprint supplement (doi:10.21203/rs.3.rs-2917479/v1), 2023-05-17
Supplement: Supplementary file 2 [file 37dd2a95b8f70533be018c05.xlsx]

## Sheet: Table 1
T: Gene Symbol	T: Description
FN1	Fibronectin
COL6A3	Collagen alpha-3(VI) chain
COL1A2	Collagen alpha-2(I) chain
COL1A1	Collagen alpha-1(I) chain
COL12A1	Collagen alpha-1(XII) chain
VWF	von Willebrand factor
THBS1	Thrombpondin-1
PLEC	Plectin
COL3A1	Collagen alpha-1(III) chain
POSTN	Periostin
COL6A1	Collagen alpha-1(VI) chain
COL5A2	Collagen alpha-2(V) chain
COL5A1	Collagen alpha-1(V) chain
VCL	Vinculin
LAMA4	Laminin subunit alpha-4
THBS2	Thrombpondin-2
LAMC1	Laminin subunit gamma-1
MMP2	72 kDa type IV collagenase
LTBP1	Latent-transforming growth factor beta-binding protein 1
LAMB1	Laminin subunit beta-1
COL6A2	Collagen alpha-2(VI) chain
VIM	Vimentin
LTBP2	Latent-transforming growth factor beta-binding protein 2
BGN	Biglycan
SPARC	Secreted Protein Acidic And Cysteine Rich/ Osteonectin
GC	Vitamin D-binding protein
COL11A1	Collagen alpha-1(XI) chain
TGFBI	Transforming growth factor-beta-induced protein ig-h3
HAPLN1	Hyaluronan and proteoglycan link protein 1
COL4A2	Collagen alpha-2(IV) chain
COL14A1	Collagen alpha-1(XIV) chain
PCOLCE	Procollagen C-endopeptidase enhancer 1
TIMP2	Metalloproteinase inhibitor 2
MXRA5	Matrix-remodeling-associated protein 5
TUBB4B	Tubulin beta-4B chain
TUBB	Tubulin beta chain
ECM1	Extracellular matrix protein 1
FBLN1	Fibulin-1
MMP9	Matrix metalloproteinase-9
MRC2	C-type manne receptor 2
DCN	Decorin
CDH11	Cadherin-11
EFEMP1	EGF-containing fibulin-like extracellular matrix protein 1
LAMC2	Laminin subunit gamma-2
TUBA1A	Tubulin alpha-1A chain
PLOD2	Procollagen-lysine,2-oxoglutarate 5-dioxygenase 2
TUBB2B	Tubulin beta-2B chain
IGFBP7	Insulin-like growth factor-binding protein 7
CCN2	CCN family member 2
MMP1	Interstitial collagenase
CEMIP	Cell migration-inducing and hyaluronan-binding protein
BMP1	Bone morphogenetic protein 1
LGALS1	Galectin-1
VCAM1	Vascular cell adhesion protein 1
MMP13	Collagenase 3
TIMP1	Metalloproteinase inhibitor 1
TUBB3	Tubulin beta-3 chain
ARPC1B	Actin-related protein 2/3 complex subunit 1B
TUBA1C	Tubulin alpha-1C chain
CTSB	Cathepsin B
SDF4	45 kDa calcium-binding protein
CCN1	CCN family member 1
COL7A1	Collagen alpha-1(VII) chain
SVEP1	Sushi, von Willebrand factor type A, EGF and pentraxin domain-containing protein 1
MYH10	Myin-10
TGFB1	Transforming growth factor beta-1 proprotein
AGT	Angiotensinogen
VASP	Vasodilator-stimulated phosphoprotein
COL8A1	Collagen alpha-1(VIII) chain
IGFBP4	Insulin-like growth factor-binding protein 4
HDGF	Hepatoma-derived growth factor
PLOD1	Procollagen-lysine,2-oxoglutarate 5-dioxygenase 1
LGALS3BP	Galectin-3-binding protein
IGFALS	Insulin-like growth factor-binding protein complex acid labile subunit
LTBP3	Latent-transforming growth factor beta-binding protein 3
PA2G4	Proliferation-associated protein 2G4
COL4A1	Collagen alpha-1(IV) chain
EPS15	Epidermal growth factor receptor substrate 15
CTHRC1	Collagen triple helix repeat-containing protein 1
EFEMP2	EGF-containing fibulin-like extracellular matrix protein 2
EPS15L1	Epidermal growth factor receptor substrate 15-like 1
OGN	Mimecan
VEGFC	Vascular endothelial growth factor C
TUBB6	Tubulin beta-6 chain
COL5A3	Collagen alpha-3(V) chain
TUBB1	Tubulin beta-1 chain
MST1	Hepatocyte growth factor-like protein
IGFBP3	Insulin-like growth factor-binding protein 3
MMP3	Stromelysin-1
MMP8	Neutrophil collagenase
CTSZ	Cathepsin Z
MYDGF	Myeloid-derived growth factor
MXRA8	Matrix remodeling-associated protein 8
ARG1	Arginase-1
PECAM1	Platelet endothelial cell adhesion molecule
FAM20C	Extracellular serine/threonine protein kinase FAM20C
LGALS3	Galectin-3
COL8A2	Collagen alpha-2(VIII) chain
IGFBP2	Insulin-like growth factor-binding protein 2
GRB2	Growth factor receptor-bound protein 2
CTSD	Cathepsin D
CSF1	Macrophage colony-stimulating factor 1
CDH13	Cadherin-13
MET	Hepatocyte growth factor receptor
IGF2R	Cation-independent manne-6-phphate receptor
HGFAC	Hepatocyte growth factor activator
SAFB	Scaffold attachment factor B1
CLEC11A	C-type lectin domain family 11 member A
PTGR1	Prostaglandin reductase 1
MEGF8	Multiple epidermal growth factor-like domains protein 8
MMP14	Matrix metalloproteinase-14
CTSG	Cathepsin G
CTNNB1	Catenin beta-1
ARPC1A	Actin-related protein 2/3 complex subunit 1A
PCNA	Proliferating cell nuclear antigen
LAMB2	Laminin subunit beta-2
ILF2	Interleukin enhancer-binding factor 2
COL16A1	Collagen alpha-1(XVI) chain
HABP2	Hyaluronan-binding protein 2
CTSL	Procathepsin L
F11R	Junctional adhesion molecule A
TNFAIP6	Tumor necris factor-inducible gene 6 protein
PTK2	Focal adhesion kinase 1
SAFB2	Scaffold attachment factor B2
CD36	Platelet glycoprotein 4
LGALSL	Galectin-related protein
CD14	Monocyte differentiation antigen CD14
IL1RAP	Interleukin-1 receptor accessory protein
TNFRSF11B	Tumor necris factor receptor superfamily member 11B
TIMP3	Metalloproteinase inhibitor 3
PTN	Pleiotrophin
OMD	Osteomodulin
PDGFRA	Platelet-derived growth factor receptor alpha
CLEC1B	C-type lectin domain family 1 member B
HAPLN3	Hyaluronan and proteoglycan link protein 3
CRTAC1	Cartilage acidic protein 1
FBLN5	Fibulin-5
PDGFRL	Platelet-derived growth factor receptor-like protein
ACTL6A	Actin-like protein 6A
ANGPT1	Angiopoietin-1
CCBE1	Collagen and calcium-binding EGF domain-containing protein 1
ICAM2	Intercellular adhesion molecule 2
ANGPTL4	Angiopoietin-related protein 4
OSTF1	Osteoclast-stimulating factor 1
MIF	Macrophage migration inhibitory factor
TGFB1I1	Transforming growth factor beta-1-induced transcript 1 protein
ANG	Angiogenin
CCN4	CCN family member 4
TNFRSF1A	Tumor necris factor receptor superfamily member 1A
CCN5	CCN family member 5
CKAP4	Cytkeleton-associated protein 4
IGFBP5	Insulin-like growth factor-binding protein 5
TGFB2	Transforming growth factor beta-2 proprotein
CTSS	Cathepsin S
GAP43	Neuromodulin
PROCR	Endothelial protein C receptor
WNT5A	Protein Wnt-5a
SDF2	Stromal cell-derived factor 2
CKAP5	Cytkeleton-associated protein 5
PDGFD	Platelet-derived growth factor D
LTBP4	Latent-transforming growth factor beta-binding protein 4
VEGFA	Vascular endothelial growth factor A
HDGFL2	Hepatoma-derived growth factor-related protein 2
CCL5	C-C motif chemokine 5
MXRA7	Matrix-remodeling-associated protein 7
LIF	Leukemia inhibitory factor
IL6ST	Interleukin-6 receptor subunit beta
COLGALT1	Procollagen galactyltransferase 1
SPP1	Osteopontin
IL6	Interleukin-6
EDF1	Endothelial differentiation-related factor 1
WNT5B	Protein Wnt-5b
NECTIN2	Nectin-2
CRTAP	Cartilage-associated protein
EGF	Pro-epidermal growth factor
ALPL	Alkaline phphatase, tissue-nonspecific isozyme
HGS	Hepatocyte growth factor-regulated tyrine kinase substrate
CCL2	C-C motif chemokine 2
ANGPTL2	Angiopoietin-related protein 2
ECM2	Extracellular matrix protein 2
CXCL8	Interleukin-8
CADM1	Cell adhesion molecule 1
PDGFB	Platelet-derived growth factor subunit B
CXCL12	Stromal cell-derived factor 1
PRG2	Bone marrow proteoglycan
IGF2	Insulin-like growth factor II
TGFBR2	TGF-beta receptor type-2
EGFR	Epidermal growth factor receptor
EDA2R	Tumor necris factor receptor superfamily member 27
AIF1	Allograft inflammatory factor 1
SMOC1	SPARC-related modular calcium-binding protein 1
PDGFC	Platelet-derived growth factor C
CTSO	Cathepsin O
FGF7	Fibroblast growth factor 7
ECE1	Endothelin-converting enzyme 1
ENG	Endoglin
HLA-DRA	HLA class II histocompatibility antigen, DR alpha chain
ANGPTL6	Angiopoietin-related protein 6
IKBKG	NF-kappa-B essential modulator
CCL18	C-C motif chemokine 18
CCN3	CCN family member 3
PTGES3	Prtaglandin E synthase 3
CCAR1	Cell division cycle and apoptis regulator protein 1
CDH4	Cadherin-4
BCAM	Basal cell adhesion molecule
CTSF	Cathepsin F
GPNMB	Transmembrane glycoprotein NMB
ICAM3	Intercellular adhesion molecule 3
FGFRL1	Fibroblast growth factor receptor-like 1
AAMP	Angio-associated migratory cell protein
EPS8	Epidermal growth factor receptor kinase substrate 8
NECTIN1	Nectin-1
FLT4	Vascular endothelial growth factor receptor 3
KITLG	Kit ligand
CHSY3	Chondroitin sulfate synthase 3
CHL1	Neural cell adhesion molecule L1-like protein
TNFRSF14	Tumor necris factor receptor superfamily member 14
CXCL5	C-X-C motif chemokine 5
CDH1	Cadherin-1
VWA5A	von Willebrand factor A domain-containing protein 5A
PDGFA	Platelet-derived growth factor subunit A
MARCO	Macrophage receptor MARCO
GNAS	Neuroendocrine secretory protein 55
ENAM	Enamelin
CLEC2B	C-type lectin domain family 2 member B
MYH2	Myin-2
CD40	Tumor necris factor receptor superfamily member 5
FGF1	Fibroblast growth factor 1
FGF2	Fibroblast growth factor 2
SELE	E Selectin
THBS5	Thrombospondin 5
TNFA	Tumor necris factor alpha
SERPINF1	Pigment epithelium-derived factor
CLEC3B	Tetranectin
