# Supplementary material for: Proteomic analysis of mesenchymal stromal cells secretome in comparison to leukocyte- and platelet-rich fibrin
Source: Research Square preprint supplement (doi:10.21203/rs.3.rs-2917479/v1), 2023-05-17
Supplement: Supplementary file 3 [file 57fdff1ab124911c1f18e8e0.xlsx]

## Sheet: LPRF CM ALL
source,	term_name	term_id	adjusted_p_value	negative_log10_of_adjusted_p_value	term_size	query_size	intersection_size	effective_domain_size	intersections
GO:MF,	signaling receptor binding	GO:0005102	8.499683654643663e-15	14.070597237767974	1556	110	40	20171	A2M,FGB,VWF,FGG,FGA,PLG,LCP1,VCP,IGHM,IGHG2,HRG,IGHG4,ITGB3,ITGA2B,S100A12,FGL1,PPBP,IGLC2,S100A8,MANF,CANX,PF4,ITGA6,GRB2,PTPA,S100A9,ITGB2,PF4V1,PTPRC,IGHV3-23,PTK2,S100A4,IGHV3-7,CD36,IGHV5-51,TGFB1I1,IL6ST,IGHV2-26,GUSB,IGHV2-70D
GO:MF,	immunoglobulin receptor binding	GO:0034987	2.2905544625990222e-7	6.640059377529012	78	110	9	20171	IGHM,IGHG2,IGHG4,IGLC2,IGHV3-23,IGHV3-7,IGHV5-51,IGHV2-26,IGHV2-70D
GO:MF,	calcium-dependent protein binding	GO:0048306	3.6148993497047896e-7	6.441903790340777	82	110	9	20171	A2M,SELP,S100A12,MASP1,S100A8,S100A9,S100A4,TSG101,MASP2
GO:MF,	antigen binding	GO:0003823	0.0000012050832377836151	5.918982954365784	169	110	11	20171	PLG,IGHM,IGHG2,IGHG4,IGLC2,IGHV3-23,IGHV3-7,IGHV5-51,IGKV4-1,IGHV2-26,IGHV2-70D
GO:MF,	opsonin binding	GO:0001846	0.00004692849576161157	4.328563366369256	21	110	5	20171	C4A,CFHR1,CFHR2,ITGB2,MASP2
GO:MF,	RAGE receptor binding	GO:0050786	0.00009630950077634483	4.016330868314558	10	110	4	20171	S100A12,S100A8,S100A9,S100A4
GO:MF,	protein binding	GO:0005515	0.00011810250873413449	3.9277408770027495	14778	110	102	20171	A2M,FGB,VWF,FGG,FGA,C4A,PLG,LCP1,VCP,IGHM,IGHG2,C4BPA,HBB,LTF,HRG,SERPINF2,IGHG4,ITGB3,SELP,ITGA2B,BIN2,ARHGDIB,PDLIM1,CA2,HBD,CA1,RSU1,S100A12,LCN2,FGL1,AZGP1,GP5,GP1BA,PPBP,LIMS1,GLOD4,ENDOD1,CORO1A,CFHR1,IGLC2,MASP1,S100A8,RBP4,PTPN6,LSP1,MANF,MLEC,SH3BGRL2,UNC13D,CDA,PECAM1,CFHR2,CANX,PF4,ITGA6,H1-4,GRB2,PTPA,CPN1,IQGAP2,SKAP2,S100A9,GCA,ITGB2,PF4V1,LYZ,STX7,WBP2,RAB27B,RGS10,PTPRC,IGHV3-23,P…
GO:MF,	complement binding	GO:0001848	0.00014844279062127538	3.828440889812146	26	110	5	20171	C4A,CFHR1,CFHR2,ITGB2,MASP2
GO:MF,	cell adhesion molecule binding	GO:0050839	0.00022167055204887147	3.6542919971522116	561	110	15	20171	FGB,VWF,FGG,FGA,LCP1,ITGB3,ITGA2B,PDLIM1,GLOD4,PTPN6,ITGA6,ITGB2,PTK2,EFHD2,ASAP1
GO:MF,	identical protein binding	GO:0042802	0.00279278517782875	2.55396246912236	2086	110	28	20171	A2M,VWF,FGG,VCP,SERPINF2,ITGB3,ITGA2B,S100A12,LCN2,CORO1A,CFHR1,MASP1,CDA,PECAM1,CFHR2,GRB2,PTPA,GCA,LYZ,S100A4,STOM,COLEC11,GPX3,IL6ST,RUFY1,TSG101,MASP2,DPYD
GO:MF,	complement component C3b binding	GO:0001851	0.014169284658367786	1.84865207471835	11	110	3	20171	CFHR1,CFHR2,ITGB2
GO:MF,	integrin binding	GO:0005178	0.014409383771146688	1.8413545917407017	158	110	7	20171	VWF,LCP1,ITGB3,ITGA2B,ITGA6,ITGB2,PTK2
GO:MF,	cyanamide hydratase activity	GO:0018820	0.0165563978213832	1.7810341468064437	2	110	2	20171	CA2,CA1
GO:MF,	Toll-like receptor binding	GO:0035325	0.018817342281675385	1.7254417153354127	12	110	3	20171	S100A8,S100A9,CD36
GO:MF,	lipid binding	GO:0008289	0.02333010194604305	1.6320833634562597	825	110	15	20171	VCP,IGHM,LTF,SELP,BIN2,S100A8,RBP4,MANF,IQGAP2,APOM,S100A9,CD36,FCGR3B,RUFY1,ASAP1
GO:MF,	cation binding	GO:0043169	0.03269775114586494	1.4854821157961893	4368	110	42	20171	FGG,FGA,LCP1,IGHM,HBB,LTF,HRG,SELP,ITGA2B,PDLIM1,CA2,HBD,CA1,S100A12,LCN2,LIMS1,ENDOD1,MASP1,S100A8,CPB2,MMP8,UNC13D,CDA,CANX,ITGA6,CPN1,S100A9,GCA,ITGB2,S100A4,CA13,COLEC11,TGFB1I1,EFHD2,RP2,RUFY1,ITSN2,MASP2,ASAP1,DPYD,ZNF578,ASH1L
GO:MF,	carbonate dehydratase activity	GO:0004089	0.03845601289097933	1.4150357452979594	15	110	3	20171	CA2,CA1,CA13
GO:MF,	protein-containing complex binding	GO:0044877	0.04252445372282282	1.3713612567086322	1304	110	19	20171	VWF,C4A,LCP1,VCP,HRG,ITGB3,ITGA2B,CORO1A,ITGA6,H1-4,GRB2,IQGAP2,ITGB2,PTPRC,PTK2,CD36,FCGR3B,TSG101,VPS4A
GO:MF,	metal ion binding	GO:0046872	0.04509122632246614	1.3459079532532476	4275	110	41	20171	FGG,FGA,LCP1,HBB,LTF,HRG,SELP,ITGA2B,PDLIM1,CA2,HBD,CA1,S100A12,LCN2,LIMS1,ENDOD1,MASP1,S100A8,CPB2,MMP8,UNC13D,CDA,CANX,ITGA6,CPN1,S100A9,GCA,ITGB2,S100A4,CA13,COLEC11,TGFB1I1,EFHD2,RP2,RUFY1,ITSN2,MASP2,ASAP1,DPYD,ZNF578,ASH1L
GO:MF,	antioxidant activity	GO:0016209	0.054195472505191154	1.2660369929476105	84	110	5	20171	HBB,HBD,APOM,S100A9,GPX3
GO:MF,	CXCR chemokine receptor binding	GO:0045236	0.06814968617096868	1.166536139749049	18	110	3	20171	PPBP,PF4,PF4V1
GO:MF,	calcium ion binding	GO:0005509	0.08922833335270099	1.0494972188876455	724	110	13	20171	LCP1,SELP,S100A12,MASP1,S100A8,CANX,S100A9,GCA,S100A4,COLEC11,EFHD2,ITSN2,MASP2
GO:MF,	Toll-like receptor 4 binding	GO:0035662	0.0986305547145061	1.005988524325727	4	110	2	20171	S100A8,S100A9
GO:MF,	immunoglobulin binding	GO:0019865	0.1265885679125875	0.8976055132496303	22	110	3	20171	VWF,HRG,FCGR3B
GO:MF,	hemoglobin alpha binding	GO:0031721	0.1637979154563198	0.7856916295083121	5	110	2	20171	HBB,HBD
GO:MF,	neuregulin binding	GO:0038132	0.1637979154563198	0.7856916295083121	5	110	2	20171	ITGB3,ITGA6
GO:MF,	fucose binding	GO:0042806	0.1637979154563198	0.7856916295083121	5	110	2	20171	SELP,COLEC11
GO:MF,	heparin binding	GO:0008201	0.21021847887474468	0.6773291107597295	173	110	6	20171	LTF,HRG,SELP,PF4,PF4V1,PTPRC
GO:MF,	glycosaminoglycan binding	GO:0005539	0.2159705349675867	0.6656054959502956	244	110	7	20171	IGHM,LTF,HRG,SELP,PF4,PF4V1,PTPRC
GO:MF,	icosatetraenoic acid binding	GO:0050543	0.24482085764610023	0.6111515849957171	6	110	2	20171	S100A8,S100A9
GO:MF,	arylesterase activity	GO:0004064	0.24482085764610023	0.6111515849957171	6	110	2	20171	CA2,CA1
GO:MF,	arachidonic acid binding	GO:0050544	0.24482085764610023	0.6111515849957171	6	110	2	20171	S100A8,S100A9
GO:MF,	ion binding	GO:0043167	0.2729924568319974	0.5638493529647342	6079	110	50	20171	FGG,FGA,LCP1,VCP,IGHM,HBB,LTF,HRG,SELP,ITGA2B,PDLIM1,CA2,HBD,CA1,S100A12,LCN2,LIMS1,ENDOD1,MASP1,S100A8,CPB2,MMP8,UNC13D,CDA,CANX,ITGA6,PTPA,CPN1,IQGAP2,S100A9,GCA,ITGB2,RAB27B,PTK2,S100A4,CA13,COLEC11,TGFB1I1,EFHD2,RP2,RUFY1,ITSN2,MASP2,ASAP1,DPYD,PIK3C3,VPS4A,CKMT2,ZNF578,ASH1L
GO:MF,	glycolipid binding	GO:0051861	0.292134554064126	0.5344170710584955	29	110	3	20171	SELP,MANF,FCGR3B
GO:MF,	icosanoid binding	GO:0050542	0.3415276556525734	0.46657412298976364	7	110	2	20171	S100A8,S100A9
GO:MF,	growth factor binding	GO:0019838	0.4415572314487941	0.35501299833431543	132	110	5	20171	A2M,ITGB3,ITGA6,CD36,IL6ST
GO:MF,	protease binding	GO:0002020	0.4885788617381455	0.31106532661568875	135	110	5	20171	A2M,VWF,VCP,SERPINF2,ITGB3
GO:MF,	hemoglobin binding	GO:0030492	0.5813127664321146	0.23559013923157116	9	110	2	20171	HBB,HBD
GO:MF,	transition metal ion binding	GO:0046914	0.5949815562364509	0.2254964967065505	1115	110	15	20171	LTF,HRG,CA2,CA1,S100A12,LCN2,LIMS1,S100A8,CPB2,MMP8,CDA,CPN1,S100A9,S100A4,CA13
GO:MF,	haptoglobin binding	GO:0031720	0.7240544489453538	0.14022877359930763	10	110	2	20171	HBB,HBD
GO:MF,	SH2 domain binding	GO:0042169	0.7562425587421783	0.1213388856791242	40	110	3	20171	PTPN6,PTK2,RUFY1
GO:MF,	peptidase regulator activity	GO:0061134	0.8843902826529402	0.05335603793117045	228	110	6	20171	A2M,C4A,VCP,LTF,HRG,SERPINF2
GO:MF,	SNARE binding	GO:0000149	1	0	109	110	1	20171	STX7
GO:MF,	protein transmembrane transporter activity	GO:0008320	1	0	22	110	1	20171	AZGP1
GO:MF,	selenium binding	GO:0008430	1	0	9	110	1	20171	GPX3
GO:MF,	JUN kinase binding	GO:0008432	1	0	9	110	1	20171	PTK2
GO:MF,	organic anion transmembrane transporter activity	GO:0008514	1	0	193	110	1	20171	CD36
GO:MF,	G protein-coupled peptide receptor activity	GO:0008528	1	0	144	110	1	20171	GP1BA
GO:MF,	S-adenosylmethionine-dependent methyltransferase activity	GO:0008757	1	0	167	110	1	20171	ASH1L
GO:MF,	coreceptor activity	GO:0015026	1	0	47	110	1	20171	ITGB3
GO:MF,	thrombin-activated receptor activity	GO:0015057	1	0	5	110	1	20171	GP1BA
GO:MF,	carbohydrate transmembrane transporter activity	GO:0015144	1	0	44	110	1	20171	PPBP
GO:MF,	monosaccharide transmembrane transporter activity	GO:0015145	1	0	28	110	1	20171	PPBP
GO:MF,	hexose transmembrane transporter activity	GO:0015149	1	0	25	110	1	20171	PPBP
GO:MF,	protein methyltransferase activity	GO:0008276	1	0	95	110	1	20171	ASH1L
GO:MF,	fatty acid transmembrane transporter activity	GO:0015245	1	0	10	110	1	20171	CD36
GO:MF,	short-chain fatty acid transmembrane transporter activity	GO:0015636	1	0	3	110	1	20171	CD36
GO:MF,	alcohol transmembrane transporter activity	GO:0015665	1	0	4	110	1	20171	RBP4
GO:MF,	channel regulator activity	GO:0016247	1	0	145	110	1	20171	STX7
GO:MF,	channel inhibitor activity	GO:0016248	1	0	39	110	1	20171	STX7
GO:MF,	lysine N-methyltransferase activity	GO:0016278	1	0	63	110	1	20171	ASH1L
GO:MF,	protein-lysine N-methyltransferase activity	GO:0016279	1	0	62	110	1	20171	ASH1L
GO:MF,	lipase activity	GO:0016298	1	0	133	110	1	20171	PLBD1
GO:MF,	kinase activity	GO:0016301	1	0	795	110	3	20171	PTK2,PIK3C3,CKMT2
GO:MF,	1-phosphatidylinositol-3-kinase activity	GO:0016303	1	0	10	110	1	20171	PIK3C3
GO:MF,	pyrophosphatase activity	GO:0016462	1	0	730	110	5	20171	VCP,ARHGDIB,RAB27B,RGS10,VPS4A
GO:MF,	oxidoreductase activity	GO:0016491	1	0	753	110	4	20171	HBB,HBD,GPX3,DPYD
GO:MF,	tubulin binding	GO:0015631	1	0	383	110	2	20171	S100A8,S100A9
GO:MF,	peptidase activator activity	GO:0016504	1	0	44	110	1	20171	VCP
GO:MF,	zinc ion binding	GO:0008270	1	0	837	110	12	20171	HRG,CA2,CA1,S100A12,LIMS1,S100A8,CPB2,MMP8,CDA,CPN1,S100A9,CA13
GO:MF,	metallopeptidase activity	GO:0008237	1	0	186	110	3	20171	CPB2,MMP8,CPN1
GO:MF,	insulin-like growth factor binding	GO:0005520	1	0	20	110	2	20171	ITGB3,ITGA6
GO:MF,	ATP binding	GO:0005524	1	0	1500	110	6	20171	VCP,PTPA,PTK2,PIK3C3,VPS4A,CKMT2
GO:MF,	GTP binding	GO:0005525	1	0	385	110	2	20171	RAB27B,RP2
GO:MF,	macrolide binding	GO:0005527	1	0	12	110	1	20171	LCN2
GO:MF,	mannose binding	GO:0005537	1	0	22	110	1	20171	COLEC11
GO:MF,	phospholipid binding	GO:0005543	1	0	471	110	6	20171	IGHM,BIN2,IQGAP2,APOM,FCGR3B,ASAP1
GO:MF,	phosphatidylinositol-4,5-bisphosphate binding	GO:0005546	1	0	85	110	1	20171	ASAP1
GO:MF,	phosphatidylinositol-3,4,5-trisphosphate binding	GO:0005547	1	0	40	110	2	20171	IQGAP2,ASAP1
GO:MF,	chemokine activity	GO:0008009	1	0	50	110	3	20171	PPBP,PF4,PF4V1
GO:MF,	microtubule binding	GO:0008017	1	0	275	110	2	20171	S100A8,S100A9
GO:MF,	protein C-terminus binding	GO:0008022	1	0	186	110	2	20171	CORO1A,VPS4A
GO:MF,	exopeptidase activity	GO:0008238	1	0	98	110	2	20171	CPB2,CPN1
GO:MF,	monocarboxylic acid transmembrane transporter activity	GO:0008028	1	0	59	110	1	20171	CD36
GO:MF,	enzyme activator activity	GO:0008047	1	0	566	110	8	20171	VCP,LTF,ARHGDIB,PTPA,IQGAP2,RGS10,RP2,ASAP1
GO:MF,	growth factor activity	GO:0008083	1	0	165	110	2	20171	PPBP,MANF
GO:MF,	cytoskeletal protein binding	GO:0008092	1	0	1004	110	11	20171	LCP1,PDLIM1,CORO1A,S100A8,LSP1,IQGAP2,S100A9,RAB27B,PTPRC,PTK2,S100A4
GO:MF,	transcription factor binding	GO:0008134	1	0	589	110	2	20171	WBP2,TGFB1I1
GO:MF,	protein tyrosine phosphatase activator activity	GO:0008160	1	0	2	110	1	20171	PTPA
GO:MF,	methyltransferase activity	GO:0008168	1	0	224	110	1	20171	ASH1L
GO:MF,	N-methyltransferase activity	GO:0008170	1	0	101	110	1	20171	ASH1L
GO:MF,	ion channel inhibitor activity	GO:0008200	1	0	38	110	1	20171	STX7
GO:MF,	peptidase activity	GO:0008233	1	0	624	110	7	20171	PLG,LTF,MASP1,CPB2,MMP8,CPN1,MASP2
GO:MF,	metalloexopeptidase activity	GO:0008235	1	0	66	110	2	20171	CPB2,CPN1
GO:MF,	serine-type peptidase activity	GO:0008236	1	0	198	110	5	20171	PLG,LTF,MASP1,MMP8,MASP2
GO:MF,	high-density lipoprotein particle binding	GO:0008035	1	0	10	110	1	20171	CD36
GO:MF,	oxidoreductase activity, acting on the CH-CH group of donors	GO:0016627	1	0	65	110	1	20171	DPYD
GO:MF,	oxidoreductase activity, acting on the CH-CH group of donors, NAD or NADP as acceptor	GO:0016628	1	0	30	110	1	20171	DPYD
GO:MF,	oxidoreductase activity, acting on peroxide as acceptor	GO:0016684	1	0	56	110	3	20171	HBB,HBD,GPX3
GO:MF,	fibroblast growth factor binding	GO:0017134	1	0	23	110	1	20171	ITGB3
GO:MF,	serine hydrolase activity	GO:0017171	1	0	202	110	5	20171	PLG,LTF,MASP1,MMP8,MASP2
GO:MF,	histone lysine N-methyltransferase activity	GO:0018024	1	0	45	110	1	20171	ASH1L
GO:MF,	guanyl nucleotide binding	GO:0019001	1	0	407	110	2	20171	RAB27B,RP2
GO:MF,	GDP binding	GO:0019003	1	0	71	110	1	20171	RAB27B
GO:MF,	transmembrane receptor protein phosphatase activity	GO:0019198	1	0	17	110	2	20171	PTPN6,PTPRC
GO:MF,	kinase regulator activity	GO:0019207	1	0	247	110	1	20171	LTF
GO:MF,	phosphatase regulator activity	GO:0019208	1	0	117	110	2	20171	PTPA,PPP1R14A
GO:MF,	kinase activator activity	GO:0019209	1	0	121	110	1	20171	LTF
GO:MF,	phosphatase activator activity	GO:0019211	1	0	24	110	1	20171	PTPA
GO:MF,	phosphatase inhibitor activity	GO:0019212	1	0	55	110	1	20171	PPP1R14A
GO:MF,	SH3 domain binding	GO:0017124	1	0	124	110	4	20171	PTPN6,SH3BGRL2,GRB2,RUFY1
GO:MF,	deaminase activity	GO:0019239	1	0	33	110	1	20171	CDA
GO:MF,	isoprenoid binding	GO:0019840	1	0	38	110	1	20171	RBP4
GO:MF,	retinol binding	GO:0019841	1	0	16	110	1	20171	RBP4
GO:MF,	vitamin binding	GO:0019842	1	0	150	110	1	20171	RBP4
GO:MF,	IgG binding	GO:0019864	1	0	9	110	1	20171	FCGR3B
GO:MF,	chloride channel inhibitor activity	GO:0019869	1	0	10	110	1	20171	STX7
GO:MF,	protein kinase regulator activity	GO:0019887	1	0	219	110	1	20171	LTF
GO:MF,	protein phosphatase regulator activity	GO:0019888	1	0	98	110	2	20171	PTPA,PPP1R14A
GO:MF,	enzyme binding	GO:0019899	1	0	2082	110	20	20171	A2M,VWF,PLG,LCP1,VCP,SERPINF2,ITGB3,ARHGDIB,LIMS1,PTPN6,MLEC,UNC13D,GRB2,PTPA,IQGAP2,ITGB2,PTPRC,PTK2,STOM,TSG101
GO:MF,	kinase binding	GO:0019900	1	0	788	110	8	20171	PLG,ITGB3,LIMS1,PTPN6,GRB2,ITGB2,PTPRC,PTK2
GO:MF,	protein kinase binding	GO:0019901	1	0	706	110	7	20171	ITGB3,LIMS1,PTPN6,GRB2,ITGB2,PTPRC,PTK2
GO:MF,	phosphatase binding	GO:0019902	1	0	195	110	4	20171	VCP,GRB2,PTPA,PTK2
GO:MF,	oxygen binding	GO:0019825	1	0	39	110	2	20171	HBB,HBD
GO:MF,	dihydropyrimidine dehydrogenase (NADP+) activity	GO:0017113	1	0	1	110	1	20171	DPYD
GO:MF,	ribonucleoside triphosphate phosphatase activity	GO:0017111	1	0	668	110	5	20171	VCP,ARHGDIB,RAB27B,RGS10,VPS4A
GO:MF,	chloride channel regulator activity	GO:0017081	1	0	16	110	1	20171	STX7
GO:MF,	transferase activity	GO:0016740	1	0	2340	110	4	20171	PTK2,PIK3C3,CKMT2,ASH1L
GO:MF,	transferase activity, transferring one-carbon groups	GO:0016741	1	0	236	110	1	20171	ASH1L
GO:MF,	transferase activity, transferring phosphorus-containing groups	GO:0016772	1	0	967	110	3	20171	PTK2,PIK3C3,CKMT2
GO:MF,	phosphotransferase activity, alcohol group as acceptor	GO:0016773	1	0	696	110	2	20171	PTK2,PIK3C3
GO:MF,	phosphotransferase activity, nitrogenous group as acceptor	GO:0016775	1	0	7	110	1	20171	CKMT2
GO:MF,	hydrolase activity	GO:0016787	1	0	2413	110	24	20171	PLG,VCP,LTF,ARHGDIB,CA2,CA1,AZGP1,ENDOD1,MASP1,PTPN6,CPB2,MMP8,CDA,PTPA,CPN1,LYZ,RAB27B,RGS10,PTPRC,PTK2,PLBD1,GUSB,MASP2,VPS4A
GO:MF,	hydrolase activity, acting on ester bonds	GO:0016788	1	0	786	110	9	20171	CA2,CA1,AZGP1,ENDOD1,PTPN6,PTPA,PTPRC,PTK2,PLBD1
GO:MF,	phosphatase activity	GO:0016791	1	0	290	110	4	20171	PTPN6,PTPA,PTPRC,PTK2
GO:MF,	hydrolase activity, acting on glycosyl bonds	GO:0016798	1	0	138	110	2	20171	LYZ,GUSB
GO:MF,	hydrolase activity, acting on carbon-nitrogen (but not peptide) bonds	GO:0016810	1	0	139	110	1	20171	CDA
GO:MF,	hydrolase activity, acting on carbon-nitrogen (but not peptide) bonds, in cyclic amidines	GO:0016814	1	0	36	110	1	20171	CDA
GO:MF,	hydrolase activity, acting on acid anhydrides	GO:0016817	1	0	731	110	5	20171	VCP,ARHGDIB,RAB27B,RGS10,VPS4A
GO:MF,	hydrolase activity, acting on acid anhydrides, in phosphorus-containing anhydrides	GO:0016818	1	0	731	110	5	20171	VCP,ARHGDIB,RAB27B,RGS10,VPS4A
GO:MF,	lyase activity	GO:0016829	1	0	207	110	3	20171	CA2,CA1,CA13
GO:MF,	carbon-oxygen lyase activity	GO:0016835	1	0	80	110	3	20171	CA2,CA1,CA13
GO:MF,	hydro-lyase activity	GO:0016836	1	0	64	110	3	20171	CA2,CA1,CA13
GO:MF,	isomerase activity	GO:0016853	1	0	170	110	2	20171	ITGB3,PTPA
GO:MF,	cis-trans isomerase activity	GO:0016859	1	0	48	110	1	20171	PTPA
GO:MF,	intramolecular oxidoreductase activity	GO:0016860	1	0	53	110	1	20171	ITGB3
GO:MF,	intramolecular oxidoreductase activity, transposing S-S bonds	GO:0016864	1	0	18	110	1	20171	ITGB3
GO:MF,	ATP hydrolysis activity	GO:0016887	1	0	336	110	2	20171	VCP,VPS4A
GO:MF,	retinal binding	GO:0016918	1	0	19	110	1	20171	RBP4
GO:MF,	nuclear receptor binding	GO:0016922	1	0	142	110	2	20171	WBP2,TGFB1I1
GO:MF,	myosin binding	GO:0017022	1	0	74	110	2	20171	CORO1A,RAB27B
GO:MF,	purine nucleotide binding	GO:0017076	1	0	2020	110	9	20171	VCP,PTPA,RAB27B,PTK2,RP2,DPYD,PIK3C3,VPS4A,CKMT2
GO:MF,	collagen binding	GO:0005518	1	0	70	110	1	20171	VWF
GO:MF,	calmodulin binding	GO:0005516	1	0	203	110	1	20171	IQGAP2
GO:MF,	copper ion binding	GO:0005507	1	0	61	110	1	20171	S100A12
GO:MF,	iron ion binding	GO:0005506	1	0	158	110	2	20171	LTF,LCN2
GO:MF,	single-stranded DNA binding	GO:0003697	1	0	126	110	1	20171	IGHM
GO:MF,	DNA-binding transcription factor activity	GO:0003700	1	0	1415	110	1	20171	ZNF578
GO:MF,	transcription coregulator activity	GO:0003712	1	0	521	110	4	20171	PDLIM1,WBP2,TGFB1I1,TSG101
GO:MF,	transcription coactivator activity	GO:0003713	1	0	291	110	4	20171	PDLIM1,WBP2,TGFB1I1,TSG101
GO:MF,	transcription corepressor activity	GO:0003714	1	0	193	110	1	20171	TSG101
GO:MF,	RNA binding	GO:0003723	1	0	3122	110	8	20171	VCP,C4BPA,CORO1A,MANF,CANX,H1-4,GRB2,S100A4
GO:MF,	peptidyl-prolyl cis-trans isomerase activity	GO:0003755	1	0	45	110	1	20171	PTPA
GO:MF,	protein disulfide isomerase activity	GO:0003756	1	0	18	110	1	20171	ITGB3
GO:MF,	actin binding	GO:0003779	1	0	447	110	7	20171	LCP1,PDLIM1,CORO1A,LSP1,IQGAP2,PTK2,S100A4
GO:MF,	actin monomer binding	GO:0003785	1	0	30	110	1	20171	CORO1A
GO:MF,	lysozyme activity	GO:0003796	1	0	11	110	1	20171	LYZ
GO:MF,	double-stranded DNA binding	GO:0003690	1	0	1663	110	3	20171	H1-4,WBP2,ZNF578
GO:MF,	catalytic activity	GO:0003824	1	0	5691	110	33	20171	PLG,VCP,HBB,LTF,ITGB3,ARHGDIB,CA2,HBD,CA1,AZGP1,ENDOD1,MASP1,PTPN6,CPB2,MMP8,CDA,PTPA,CPN1,LYZ,RAB27B,RGS10,PTPRC,PTK2,CA13,PLBD1,GPX3,GUSB,MASP2,DPYD,PIK3C3,VPS4A,CKMT2,ASH1L
GO:MF,	G protein activity	GO:0003925	1	0	42	110	1	20171	RAB27B
GO:MF,	creatine kinase activity	GO:0004111	1	0	6	110	1	20171	CKMT2
GO:MF,	cytidine deaminase activity	GO:0004126	1	0	12	110	1	20171	CDA
GO:MF,	endopeptidase activity	GO:0004175	1	0	438	110	5	20171	PLG,LTF,MASP1,MMP8,MASP2
GO:MF,	carboxypeptidase activity	GO:0004180	1	0	45	110	2	20171	CPB2,CPN1
GO:MF,	metallocarboxypeptidase activity	GO:0004181	1	0	29	110	2	20171	CPB2,CPN1
GO:MF,	metalloendopeptidase activity	GO:0004222	1	0	111	110	1	20171	MMP8
GO:MF,	serine-type endopeptidase activity	GO:0004252	1	0	180	110	5	20171	PLG,LTF,MASP1,MMP8,MASP2
GO:MF,	nuclease activity	GO:0004518	1	0	215	110	2	20171	AZGP1,ENDOD1
GO:MF,	endonuclease activity	GO:0004519	1	0	129	110	1	20171	ENDOD1
GO:MF,	ribonuclease activity	GO:0004540	1	0	125	110	1	20171	AZGP1
GO:MF,	GTPase activity	GO:0003924	1	0	333	110	3	20171	ARHGDIB,RAB27B,RGS10
GO:MF,	chromatin binding	GO:0003682	1	0	594	110	3	20171	H1-4,WBP2,ASH1L
GO:MF,	DNA binding	GO:0003677	1	0	2526	110	8	20171	IGHM,LTF,H1-4,WBP2,COLEC11,TSG101,ZNF578,ASH1L
GO:MF,	nucleic acid binding	GO:0003676	1	0	5483	110	16	20171	VCP,IGHM,C4BPA,LTF,ENDOD1,CORO1A,MANF,CANX,H1-4,GRB2,WBP2,S100A4,COLEC11,TSG101,ZNF578,ASH1L
GO:MF,	nucleotide binding	GO:0000166	1	0	2178	110	9	20171	VCP,PTPA,RAB27B,PTK2,RP2,DPYD,PIK3C3,VPS4A,CKMT2
GO:MF,	magnesium ion binding	GO:0000287	1	0	225	110	1	20171	RP2
GO:MF,	transcription cis-regulatory region binding	GO:0000976	1	0	1504	110	2	20171	WBP2,ZNF578
GO:MF,	RNA polymerase II transcription regulatory region sequence-specific DNA binding	GO:0000977	1	0	1407	110	2	20171	WBP2,ZNF578
GO:MF,	RNA polymerase II cis-regulatory region sequence-specific DNA binding	GO:0000978	1	0	1191	110	2	20171	WBP2,ZNF578
GO:MF,	DNA-binding transcription factor activity, RNA polymerase II-specific	GO:0000981	1	0	1360	110	1	20171	ZNF578
GO:MF,	cis-regulatory region sequence-specific DNA binding	GO:0000987	1	0	1211	110	2	20171	WBP2,ZNF578
GO:MF,	transcription regulatory region nucleic acid binding	GO:0001067	1	0	1506	110	2	20171	WBP2,ZNF578
GO:MF,	lipopolysaccharide binding	GO:0001530	1	0	37	110	2	20171	LTF,SELP
GO:MF,	amyloid-beta binding	GO:0001540	1	0	84	110	2	20171	ITGB2,CD36
GO:MF,	virus receptor activity	GO:0001618	1	0	77	110	1	20171	ITGB3
GO:MF,	proteinase-activated receptor activity	GO:0001648	1	0	5	110	1	20171	GP1BA
GO:MF,	peptide receptor activity	GO:0001653	1	0	150	110	1	20171	GP1BA
GO:MF,	G protein-coupled receptor binding	GO:0001664	1	0	290	110	3	20171	PPBP,PF4,PF4V1
GO:MF,	phosphotyrosine residue binding	GO:0001784	1	0	46	110	3	20171	PTPN6,GRB2,GRAP2
GO:MF,	phosphatidylserine binding	GO:0001786	1	0	60	110	1	20171	ASAP1
GO:MF,	complement component C1q complex binding	GO:0001849	1	0	8	110	1	20171	C4A
GO:MF,	complement component C4b binding	GO:0001855	1	0	2	110	1	20171	MASP2
GO:MF,	nucleoside binding	GO:0001882	1	0	8	110	1	20171	CDA
GO:MF,	G-protein alpha-subunit binding	GO:0001965	1	0	26	110	1	20171	RGS10
GO:MF,	fibronectin binding	GO:0001968	1	0	31	110	1	20171	ITGB3
GO:MF,	nucleobase binding	GO:0002054	1	0	4	110	1	20171	DPYD
GO:MF,	uracil binding	GO:0002058	1	0	1	110	1	20171	DPYD
GO:MF,	pyrimidine nucleobase binding	GO:0002061	1	0	1	110	1	20171	DPYD
GO:MF,	molecular_function	GO:0003674	1	0	20171	110	110	20171	A2M,FGB,VWF,FGG,FGA,C4A,PLG,LCP1,VCP,IGHM,IGHG2,C4BPA,HBB,LTF,HRG,SERPINF2,IGHG4,ITGB3,SELP,ITGA2B,BIN2,ARHGDIB,PDLIM1,CA2,HBD,CA1,RSU1,S100A12,LCN2,FGL1,AZGP1,GP5,GP1BA,PPBP,LIMS1,GLOD4,ENDOD1,CORO1A,CFHR1,IGLC2,MASP1,S100A8,RBP4,PTPN6,LSP1,CPB2,MANF,MMP8,MLEC,SH3BGRL2,UNC13D,CDA,PECAM1,CFHR2,CANX,PF4,ITGA6,H1-4,GRB2,PTPA,CPN1,IQGAP2,APOM,SKAP2,S100A9,GCA,ITGB2,PF4V1,LYZ,STX7,WBP2,RAB27B,RGS10,P…
GO:MF,	hydrolase activity, hydrolyzing O-glycosyl compounds	GO:0004553	1	0	98	110	2	20171	LYZ,GUSB
GO:MF,	protein phosphatase binding	GO:0019903	1	0	149	110	4	20171	VCP,GRB2,PTPA,PTK2
GO:MF,	beta-glucuronidase activity	GO:0004566	1	0	3	110	1	20171	GUSB
GO:MF,	glutathione peroxidase activity	GO:0004602	1	0	21	110	1	20171	GPX3
GO:MF,	GTPase inhibitor activity	GO:0005095	1	0	13	110	1	20171	IQGAP2
GO:MF,	GTPase activator activity	GO:0005096	1	0	275	110	5	20171	ARHGDIB,IQGAP2,RGS10,RP2,ASAP1
GO:MF,	cytokine activity	GO:0005125	1	0	237	110	3	20171	PPBP,PF4,PF4V1
GO:MF,	cytokine receptor binding	GO:0005126	1	0	276	110	6	20171	ITGB3,PPBP,PF4,GRB2,PF4V1,IL6ST
GO:MF,	ciliary neurotrophic factor receptor binding	GO:0005127	1	0	9	110	1	20171	IL6ST
GO:MF,	interleukin-6 receptor binding	GO:0005138	1	0	7	110	1	20171	IL6ST
GO:MF,	epidermal growth factor receptor binding	GO:0005154	1	0	33	110	1	20171	GRB2
GO:MF,	platelet-derived growth factor receptor binding	GO:0005161	1	0	14	110	1	20171	ITGB3
GO:MF,	neurotrophin receptor binding	GO:0005165	1	0	12	110	1	20171	GRB2
GO:MF,	neurotrophin TRK receptor binding	GO:0005167	1	0	6	110	1	20171	GRB2
GO:MF,	neurotrophin TRKA receptor binding	GO:0005168	1	0	6	110	1	20171	GRB2
GO:MF,	Rho GDP-dissociation inhibitor activity	GO:0005094	1	0	3	110	1	20171	ARHGDIB
GO:MF,	vascular endothelial growth factor receptor binding	GO:0005172	1	0	14	110	1	20171	ITGB3
GO:MF,	extracellular matrix structural constituent	GO:0005201	1	0	174	110	4	20171	FGB,VWF,FGG,FGA
GO:MF,	transporter activity	GO:0005215	1	0	1230	110	5	20171	AZGP1,PPBP,RBP4,APOM,CD36
GO:MF,	lipid transporter activity	GO:0005319	1	0	172	110	3	20171	RBP4,APOM,CD36
GO:MF,	long-chain fatty acid transporter activity	GO:0005324	1	0	17	110	1	20171	CD36
GO:MF,	organic acid transmembrane transporter activity	GO:0005342	1	0	161	110	1	20171	CD36
GO:MF,	oxygen carrier activity	GO:0005344	1	0	15	110	2	20171	HBB,HBD
GO:MF,	glucose transmembrane transporter activity	GO:0005355	1	0	24	110	1	20171	PPBP
GO:MF,	SNAP receptor activity	GO:0005484	1	0	40	110	1	20171	STX7
GO:MF,	binding	GO:0005488	1	0	18286	110	107	20171	A2M,FGB,VWF,FGG,FGA,C4A,PLG,LCP1,VCP,IGHM,IGHG2,C4BPA,HBB,LTF,HRG,SERPINF2,IGHG4,ITGB3,SELP,ITGA2B,BIN2,ARHGDIB,PDLIM1,CA2,HBD,CA1,RSU1,S100A12,LCN2,FGL1,AZGP1,GP5,GP1BA,PPBP,LIMS1,GLOD4,ENDOD1,CORO1A,CFHR1,IGLC2,MASP1,S100A8,RBP4,PTPN6,LSP1,CPB2,MANF,MMP8,MLEC,SH3BGRL2,UNC13D,CDA,PECAM1,CFHR2,CANX,PF4,ITGA6,H1-4,GRB2,PTPA,CPN1,IQGAP2,APOM,SKAP2,S100A9,GCA,ITGB2,PF4V1,LYZ,STX7,WBP2,RAB27B,RGS10,P…
GO:MF,	retinoid binding	GO:0005501	1	0	38	110	1	20171	RBP4
GO:MF,	fatty acid binding	GO:0005504	1	0	48	110	2	20171	S100A8,S100A9
GO:MF,	structural molecule activity	GO:0005198	1	0	1095	110	5	20171	FGB,VWF,FGG,FGA,H1-4
GO:MF,	GDP-dissociation inhibitor activity	GO:0005092	1	0	16	110	1	20171	ARHGDIB
GO:MF,	guanyl-nucleotide exchange factor activity	GO:0005085	1	0	231	110	1	20171	ITSN2
GO:MF,	protein kinase C binding	GO:0005080	1	0	56	110	1	20171	ITGB3
GO:MF,	phospholipase activity	GO:0004620	1	0	110	110	1	20171	PLBD1
GO:MF,	protein kinase activity	GO:0004672	1	0	587	110	2	20171	PTK2,PIK3C3
GO:MF,	protein tyrosine kinase activity	GO:0004713	1	0	147	110	1	20171	PTK2
GO:MF,	non-membrane spanning protein tyrosine kinase activity	GO:0004715	1	0	45	110	1	20171	PTK2
GO:MF,	phosphoprotein phosphatase activity	GO:0004721	1	0	189	110	4	20171	PTPN6,PTPA,PTPRC,PTK2
GO:MF,	protein tyrosine phosphatase activity	GO:0004725	1	0	100	110	3	20171	PTPN6,PTPRC,PTK2
GO:MF,	non-membrane spanning protein tyrosine phosphatase activity	GO:0004726	1	0	12	110	1	20171	PTPN6
GO:MF,	enzyme inhibitor activity	GO:0004857	1	0	397	110	7	20171	A2M,C4A,LTF,HRG,SERPINF2,IQGAP2,PPP1R14A
GO:MF,	protein phosphatase inhibitor activity	GO:0004864	1	0	52	110	1	20171	PPP1R14A
GO:MF,	protein serine/threonine phosphatase inhibitor activity	GO:0004865	1	0	17	110	1	20171	PPP1R14A
GO:MF,	endopeptidase inhibitor activity	GO:0004866	1	0	178	110	5	20171	A2M,C4A,LTF,HRG,SERPINF2
GO:MF,	serine-type endopeptidase inhibitor activity	GO:0004867	1	0	100	110	3	20171	A2M,HRG,SERPINF2
GO:MF,	cysteine-type endopeptidase inhibitor activity	GO:0004869	1	0	53	110	2	20171	LTF,HRG
GO:MF,	transmembrane signaling receptor activity	GO:0004888	1	0	1271	110	7	20171	GP1BA,PTPN6,PECAM1,ITGB2,PTPRC,FCGR3B,IL6ST
GO:MF,	cytokine receptor activity	GO:0004896	1	0	100	110	1	20171	IL6ST
GO:MF,	ciliary neurotrophic factor receptor activity	GO:0004897	1	0	8	110	1	20171	IL6ST
GO:MF,	interleukin-6 receptor activity	GO:0004915	1	0	2	110	1	20171	IL6ST
GO:MF,	interleukin-11 receptor activity	GO:0004921	1	0	3	110	1	20171	IL6ST
GO:MF,	leukemia inhibitory factor receptor activity	GO:0004923	1	0	6	110	1	20171	IL6ST
GO:MF,	oncostatin-M receptor activity	GO:0004924	1	0	6	110	1	20171	IL6ST
GO:MF,	G protein-coupled receptor activity	GO:0004930	1	0	834	110	1	20171	GP1BA
GO:MF,	transmembrane receptor protein tyrosine phosphatase activity	GO:0005001	1	0	17	110	2	20171	PTPN6,PTPRC
GO:MF,	low-density lipoprotein particle receptor activity	GO:0005041	1	0	15	110	1	20171	CD36
GO:MF,	scavenger receptor activity	GO:0005044	1	0	48	110	1	20171	CD36
GO:MF,	transmembrane receptor protein tyrosine kinase adaptor activity	GO:0005068	1	0	16	110	1	20171	GRB2
GO:MF,	peroxidase activity	GO:0004601	1	0	54	110	3	20171	HBB,HBD,GPX3
GO:MF,	protein domain specific binding	GO:0019904	1	0	698	110	10	20171	PLG,VCP,PTPN6,SH3BGRL2,GRB2,RAB27B,PTK2,RUFY1,GUSB,VPS4A
GO:MF,	syntaxin binding	GO:0019905	1	0	70	110	1	20171	STX7
GO:MF,	cytokine binding	GO:0019955	1	0	145	110	4	20171	A2M,ITGB3,CD36,IL6ST
GO:MF,	oligosaccharide binding	GO:0070492	1	0	15	110	2	20171	SELP,COLEC11
GO:MF,	growth factor receptor binding	GO:0070851	1	0	141	110	3	20171	ITGB3,GRB2,IL6ST
GO:MF,	lipoteichoic acid immune receptor activity	GO:0070892	1	0	1	110	1	20171	CD36
GO:MF,	lipoprotein particle binding	GO:0071813	1	0	27	110	1	20171	CD36
GO:MF,	protein-lipid complex binding	GO:0071814	1	0	27	110	1	20171	CD36
GO:MF,	Arp2/3 complex binding	GO:0071933	1	0	14	110	1	20171	IQGAP2
GO:MF,	modified amino acid binding	GO:0072341	1	0	91	110	1	20171	ASAP1
GO:MF,	protein phosphatase activator activity	GO:0072542	1	0	16	110	1	20171	PTPA
GO:MF,	vitamin transmembrane transporter activity	GO:0090482	1	0	31	110	1	20171	RBP4
GO:MF,	scaffold protein binding	GO:0097110	1	0	68	110	1	20171	IL6ST
GO:MF,	organic cyclic compound binding	GO:0097159	1	0	7536	110	29	20171	VCP,IGHM,C4BPA,HBB,LTF,HRG,HBD,LCN2,ENDOD1,CORO1A,MANF,CDA,CANX,H1-4,GRB2,PTPA,WBP2,RAB27B,PTK2,S100A4,COLEC11,RP2,TSG101,DPYD,PIK3C3,VPS4A,CKMT2,ZNF578,ASH1L
GO:MF,	I-SMAD binding	GO:0070411	1	0	14	110	1	20171	TGFB1I1
GO:MF,	carbohydrate derivative binding	GO:0097367	1	0	2300	110	18	20171	VCP,IGHM,LTF,HRG,SELP,MANF,CDA,PF4,PTPA,PF4V1,RAB27B,PTPRC,PTK2,RP2,FCGR3B,PIK3C3,VPS4A,CKMT2
GO:MF,	cell-cell adhesion mediator activity	GO:0098632	1	0	54	110	1	20171	PDLIM1
GO:MF,	cadherin binding involved in cell-cell adhesion	GO:0098641	1	0	18	110	1	20171	PDLIM1
GO:MF,	molecular function regulator activity	GO:0098772	1	0	2006	110	21	20171	A2M,C4A,VCP,LTF,HRG,SERPINF2,ARHGDIB,PPBP,MANF,PF4,PTPA,IQGAP2,PF4V1,STX7,RAB27B,RGS10,PTK2,RP2,PPP1R14A,ITSN2,ASAP1
GO:MF,	ion channel regulator activity	GO:0099106	1	0	140	110	1	20171	STX7
GO:MF,	sulfatide binding	GO:0120146	1	0	6	110	1	20171	MANF
GO:MF,	calcium-dependent carbohydrate binding	GO:0120153	1	0	1	110	1	20171	COLEC11
GO:MF,	modification-dependent protein binding	GO:0140030	1	0	174	110	2	20171	VCP,PTPN6
GO:MF,	phosphorylation-dependent protein binding	GO:0140031	1	0	6	110	1	20171	PTPN6
GO:MF,	ubiquitination-like modification-dependent protein binding	GO:0140035	1	0	15	110	1	20171	VCP
GO:MF,	ubiquitin-dependent protein binding	GO:0140036	1	0	13	110	1	20171	VCP
GO:MF,	catalytic activity, acting on a protein	GO:0140096	1	0	2335	110	14	20171	PLG,LTF,ITGB3,MASP1,PTPN6,CPB2,MMP8,PTPA,CPN1,PTPRC,PTK2,MASP2,PIK3C3,ASH1L
GO:MF,	cell adhesion mediator activity	GO:0098631	1	0	65	110	1	20171	PDLIM1
GO:MF,	RNA polymerase binding	GO:0070063	1	0	58	110	1	20171	STOM
GO:MF,	thrombospondin receptor activity	GO:0070053	1	0	4	110	1	20171	CD36
GO:MF,	fibrinogen binding	GO:0070051	1	0	4	110	1	20171	ITGB3
GO:MF,	flavin adenine dinucleotide binding	GO:0050660	1	0	90	110	1	20171	DPYD
GO:MF,	NADP binding	GO:0050661	1	0	53	110	1	20171	DPYD
GO:MF,	nuclear androgen receptor binding	GO:0050681	1	0	27	110	1	20171	TGFB1I1
GO:MF,	extracellular matrix binding	GO:0050840	1	0	56	110	2	20171	ITGB3,ITGA2B
GO:MF,	quaternary ammonium group binding	GO:0050997	1	0	41	110	1	20171	IGHM
GO:MF,	actin filament binding	GO:0051015	1	0	221	110	3	20171	LCP1,CORO1A,IQGAP2
GO:MF,	GTPase binding	GO:0051020	1	0	308	110	4	20171	LCP1,ARHGDIB,UNC13D,IQGAP2
GO:MF,	unfolded protein binding	GO:0051082	1	0	114	110	2	20171	CANX,RP2
GO:MF,	chaperone binding	GO:0051087	1	0	106	110	3	20171	FGB,VWF,PLG
GO:MF,	sugar transmembrane transporter activity	GO:0051119	1	0	30	110	1	20171	PPBP
GO:MF,	phosphoprotein binding	GO:0051219	1	0	93	110	3	20171	PTPN6,GRB2,GRAP2
GO:MF,	muscle alpha-actinin binding	GO:0051371	1	0	15	110	1	20171	PDLIM1
GO:MF,	alpha-actinin binding	GO:0051393	1	0	28	110	1	20171	PDLIM1
GO:MF,	iron-sulfur cluster binding	GO:0051536	1	0	74	110	1	20171	DPYD
GO:MF,	4 iron, 4 sulfur cluster binding	GO:0051539	1	0	45	110	1	20171	DPYD
GO:MF,	metal cluster binding	GO:0051540	1	0	74	110	1	20171	DPYD
GO:MF,	protein phosphatase 2A binding	GO:0051721	1	0	31	110	1	20171	PTPA
GO:MF,	carboxylic ester hydrolase activity	GO:0052689	1	0	155	110	2	20171	CA2,CA1
GO:MF,	phosphatidylinositol kinase activity	GO:0052742	1	0	18	110	1	20171	PIK3C3
GO:MF,	molecular transducer activity	GO:0060089	1	0	1489	110	9	20171	ITGB3,GP1BA,PTPN6,PECAM1,ITGB2,PTPRC,CD36,FCGR3B,IL6ST
GO:MF,	molecular adaptor activity	GO:0060090	1	0	523	110	4	20171	ITGA2B,GRB2,STX7,ITSN2
GO:MF,	nucleoside-triphosphatase regulator activity	GO:0060589	1	0	496	110	6	20171	ARHGDIB,IQGAP2,RGS10,RP2,ITSN2,ASAP1
GO:MF,	endopeptidase regulator activity	GO:0061135	1	0	192	110	5	20171	A2M,C4A,LTF,HRG,SERPINF2
GO:MF,	RNA polymerase II-specific DNA-binding transcription factor binding	GO:0061629	1	0	354	110	2	20171	WBP2,TGFB1I1
GO:MF,	peptidoglycan muralytic activity	GO:0061783	1	0	15	110	1	20171	LYZ
GO:MF,	catalytic activity, acting on RNA	GO:0140098	1	0	397	110	1	20171	AZGP1
GO:MF,	transforming growth factor beta binding	GO:0050431	1	0	25	110	1	20171	CD36
GO:MF,	molecular carrier activity	GO:0140104	1	0	84	110	2	20171	HBB,HBD
GO:MF,	exogenous protein binding	GO:0140272	1	0	78	110	1	20171	ITGB3
GO:MF,	DNA-binding transcription factor binding	GO:0140297	1	0	482	110	2	20171	WBP2,TGFB1I1
GO:MF,	protein transporter activity	GO:0140318	1	0	32	110	1	20171	AZGP1
GO:MF,	immune receptor activity	GO:0140375	1	0	142	110	1	20171	IL6ST
GO:MF,	ATP-dependent protein disaggregase activity	GO:0140545	1	0	5	110	1	20171	VPS4A
GO:MF,	catalytic activity, acting on a nucleic acid	GO:0140640	1	0	612	110	1	20171	AZGP1
GO:MF,	ATP-dependent activity	GO:0140657	1	0	563	110	2	20171	VCP,VPS4A
GO:MF,	molecular function activator activity	GO:0140677	1	0	1284	110	14	20171	VCP,LTF,ARHGDIB,PPBP,MANF,PF4,PTPA,IQGAP2,PF4V1,RGS10,PTK2,RP2,ITSN2,ASAP1
GO:MF,	molecular function inhibitor activity	GO:0140678	1	0	724	110	9	20171	A2M,C4A,LTF,HRG,SERPINF2,IQGAP2,STX7,PPP1R14A,ITSN2
GO:MF,	protein-containing complex destabilizing activity	GO:0140776	1	0	12	110	1	20171	VPS4A
GO:MF,	histone H3 methyltransferase activity	GO:0140938	1	0	40	110	1	20171	ASH1L
GO:MF,	oxidised low-density lipoprotein particle receptor activity	GO:0150025	1	0	1	110	1	20171	CD36
GO:MF,	nucleoside phosphate binding	GO:1901265	1	0	2179	110	9	20171	VCP,PTPA,RAB27B,PTK2,RP2,DPYD,PIK3C3,VPS4A,CKMT2
GO:MF,	heterocyclic compound binding	GO:1901363	1	0	7463	110	29	20171	VCP,IGHM,C4BPA,HBB,LTF,HRG,HBD,LCN2,ENDOD1,CORO1A,MANF,CDA,CANX,H1-4,GRB2,PTPA,WBP2,RAB27B,PTK2,S100A4,COLEC11,RP2,TSG101,DPYD,PIK3C3,VPS4A,CKMT2,ZNF578,ASH1L
GO:MF,	oleate transmembrane transporter activity	GO:1901480	1	0	6	110	1	20171	CD36
GO:MF,	organic hydroxy compound transmembrane transporter activity	GO:1901618	1	0	53	110	1	20171	RBP4
GO:MF,	sulfur compound binding	GO:1901681	1	0	269	110	6	20171	LTF,HRG,SELP,PF4,PF4V1,PTPRC
GO:MF,	phosphatidylinositol phosphate binding	GO:1901981	1	0	181	110	2	20171	IQGAP2,ASAP1
GO:MF,	phosphatidylinositol bisphosphate binding	GO:1902936	1	0	110	110	1	20171	ASAP1
GO:MF,	enterobactin binding	GO:1903981	1	0	2	110	1	20171	LCN2
GO:MF,	BAT3 complex binding	GO:1904288	1	0	4	110	1	20171	VCP
GO:MF,	ubiquitin-specific protease binding	GO:1990381	1	0	18	110	1	20171	VCP
GO:MF,	protein antigen binding	GO:1990405	1	0	7	110	1	20171	PLG
GO:MF,	protein tyrosine kinase binding	GO:1990782	1	0	122	110	1	20171	GRB2
GO:MF,	sequence-specific double-stranded DNA binding	GO:1990837	1	0	1562	110	2	20171	WBP2,ZNF578
GO:MF,	transcription regulator activity	GO:0140110	1	0	1929	110	5	20171	PDLIM1,WBP2,TGFB1I1,TSG101,ZNF578
GO:MF,	Roundabout binding	GO:0048495	1	0	8	110	1	20171	TGFB1I1
GO:MF,	brain-derived neurotrophic factor binding	GO:0048403	1	0	4	110	1	20171	A2M
GO:MF,	receptor tyrosine kinase binding	GO:0030971	1	0	78	110	1	20171	GRB2
GO:MF,	heat shock protein binding	GO:0031072	1	0	126	110	1	20171	ITGB2
GO:MF,	phosphatidylcholine binding	GO:0031210	1	0	31	110	1	20171	IGHM
GO:MF,	small GTPase binding	GO:0031267	1	0	277	110	3	20171	ARHGDIB,UNC13D,IQGAP2
GO:MF,	carboxylic acid binding	GO:0031406	1	0	171	110	3	20171	SELP,S100A8,S100A9
GO:MF,	myosin V binding	GO:0031489	1	0	16	110	1	20171	RAB27B
GO:MF,	chromatin DNA binding	GO:0031490	1	0	119	110	2	20171	H1-4,WBP2
GO:MF,	nucleosome binding	GO:0031491	1	0	69	110	1	20171	H1-4
GO:MF,	nucleosomal DNA binding	GO:0031492	1	0	39	110	1	20171	H1-4
GO:MF,	polyubiquitin modification-dependent protein binding	GO:0031593	1	0	56	110	1	20171	VCP
GO:MF,	ubiquitin protein ligase binding	GO:0031625	1	0	297	110	2	20171	VCP,TSG101
GO:MF,	GTPase regulator activity	GO:0030695	1	0	496	110	6	20171	ARHGDIB,IQGAP2,RGS10,RP2,ITSN2,ASAP1
GO:MF,	insulin-like growth factor I binding	GO:0031994	1	0	13	110	2	20171	ITGB3,ITGA6
GO:MF,	ubiquitin-like protein binding	GO:0032182	1	0	116	110	1	20171	TSG101
GO:MF,	ribonucleotide binding	GO:0032553	1	0	1934	110	8	20171	VCP,PTPA,RAB27B,PTK2,RP2,PIK3C3,VPS4A,CKMT2
GO:MF,	purine ribonucleotide binding	GO:0032555	1	0	1917	110	8	20171	VCP,PTPA,RAB27B,PTK2,RP2,PIK3C3,VPS4A,CKMT2
GO:MF,	adenyl ribonucleotide binding	GO:0032559	1	0	1563	110	6	20171	VCP,PTPA,PTK2,PIK3C3,VPS4A,CKMT2
GO:MF,	guanyl ribonucleotide binding	GO:0032561	1	0	407	110	2	20171	RAB27B,RP2
GO:MF,	amide binding	GO:0033218	1	0	400	110	2	20171	ITGB2,CD36
GO:MF,	monocarboxylic acid binding	GO:0033293	1	0	80	110	2	20171	S100A8,S100A9
GO:MF,	sialic acid binding	GO:0033691	1	0	22	110	1	20171	SELP
GO:MF,	apolipoprotein binding	GO:0034185	1	0	18	110	2	20171	PLG,CANX
GO:MF,	GPI anchor binding	GO:0034235	1	0	8	110	1	20171	FCGR3B
GO:MF,	retinol transmembrane transporter activity	GO:0034632	1	0	3	110	1	20171	RBP4
GO:MF,	myosin heavy chain binding	GO:0032036	1	0	14	110	1	20171	CORO1A
GO:MF,	protein-macromolecule adaptor activity	GO:0030674	1	0	349	110	2	20171	GRB2,STX7
GO:MF,	adenyl nucleotide binding	GO:0030554	1	0	1664	110	7	20171	VCP,PTPA,PTK2,DPYD,PIK3C3,VPS4A,CKMT2
GO:MF,	signaling receptor activator activity	GO:0030546	1	0	508	110	4	20171	PPBP,MANF,PF4,PF4V1
GO:MF,	chemokine binding	GO:0019956	1	0	33	110	2	20171	A2M,ITGB3
GO:MF,	C-X-C chemokine binding	GO:0019958	1	0	6	110	1	20171	A2M
GO:MF,	interleukin-8 binding	GO:0019959	1	0	3	110	1	20171	A2M
GO:MF,	C-X3-C chemokine binding	GO:0019960	1	0	5	110	1	20171	ITGB3
GO:MF,	interleukin-1 binding	GO:0019966	1	0	9	110	1	20171	A2M
GO:MF,	interleukin-11 binding	GO:0019970	1	0	3	110	1	20171	IL6ST
GO:MF,	interleukin-6 binding	GO:0019981	1	0	2	110	1	20171	IL6ST
GO:MF,	heme binding	GO:0020037	1	0	142	110	3	20171	HBB,HRG,HBD
GO:MF,	transmembrane transporter activity	GO:0022857	1	0	1124	110	4	20171	AZGP1,PPBP,RBP4,CD36
GO:MF,	macromolecule transmembrane transporter activity	GO:0022884	1	0	28	110	1	20171	AZGP1
GO:MF,	signaling receptor complex adaptor activity	GO:0030159	1	0	51	110	1	20171	GRB2
GO:MF,	low-density lipoprotein particle binding	GO:0030169	1	0	16	110	1	20171	CD36
GO:MF,	lipoprotein particle receptor activity	GO:0030228	1	0	18	110	1	20171	CD36
GO:MF,	enzyme regulator activity	GO:0030234	1	0	1264	110	14	20171	A2M,C4A,VCP,LTF,HRG,SERPINF2,ARHGDIB,PTPA,IQGAP2,RGS10,RP2,PPP1R14A,ITSN2,ASAP1
GO:MF,	carbohydrate binding	GO:0030246	1	0	282	110	5	20171	SELP,MLEC,CANX,COLEC11,GUSB
GO:MF,	protein kinase activator activity	GO:0030295	1	0	115	110	1	20171	LTF
GO:MF,	nuclear estrogen receptor binding	GO:0030331	1	0	42	110	1	20171	WBP2
GO:MF,	interleukin-17 receptor activity	GO:0030368	1	0	9	110	1	20171	IL6ST
GO:MF,	ICAM-3 receptor activity	GO:0030369	1	0	3	110	1	20171	ITGB2
GO:MF,	nuclear receptor coactivator activity	GO:0030374	1	0	57	110	1	20171	TSG101
GO:MF,	peptidase inhibitor activity	GO:0030414	1	0	184	110	5	20171	A2M,C4A,LTF,HRG,SERPINF2
GO:MF,	ankyrin binding	GO:0030506	1	0	19	110	1	20171	PTPRC
GO:MF,	spectrin binding	GO:0030507	1	0	26	110	1	20171	PTPRC
GO:MF,	structural constituent of chromatin	GO:0030527	1	0	101	110	1	20171	H1-4
GO:MF,	signaling receptor regulator activity	GO:0030545	1	0	543	110	4	20171	PPBP,MANF,PF4,PF4V1
GO:MF,	phosphatidylinositol 3-kinase activity	GO:0035004	1	0	12	110	1	20171	PIK3C3
GO:MF,	nerve growth factor binding	GO:0048406	1	0	6	110	1	20171	A2M
GO:MF,	phosphatidylinositol binding	GO:0035091	1	0	275	110	3	20171	IQGAP2,FCGR3B,ASAP1
GO:MF,	ionotropic glutamate receptor binding	GO:0035255	1	0	23	110	1	20171	CANX
GO:MF,	ADP binding	GO:0043531	1	0	34	110	1	20171	VCP
GO:MF,	protein serine/threonine kinase activator activity	GO:0043539	1	0	53	110	1	20171	LTF
GO:MF,	phosphatidylinositol 3-kinase binding	GO:0043548	1	0	30	110	1	20171	CORO1A
GO:MF,	insulin receptor substrate binding	GO:0043560	1	0	13	110	1	20171	GRB2
GO:MF,	sequence-specific DNA binding	GO:0043565	1	0	1667	110	2	20171	WBP2,ZNF578
GO:MF,	ubiquitin-like protein ligase binding	GO:0044389	1	0	315	110	2	20171	VCP,TSG101
GO:MF,	cadherin binding	GO:0045296	1	0	334	110	5	20171	PDLIM1,GLOD4,ITGA6,EFHD2,ASAP1
GO:MF,	protein phosphorylated amino acid binding	GO:0045309	1	0	58	110	3	20171	PTPN6,GRB2,GRAP2
GO:MF,	interleukin-27 receptor activity	GO:0045509	1	0	2	110	1	20171	IL6ST
GO:MF,	SMAD binding	GO:0046332	1	0	78	110	1	20171	TGFB1I1
GO:MF,	sphingolipid binding	GO:0046625	1	0	28	110	1	20171	SELP
GO:MF,	heparan sulfate proteoglycan binding	GO:0043395	1	0	18	110	2	20171	HRG,PTPRC
GO:MF,	virion binding	GO:0046790	1	0	11	110	1	20171	TSG101
GO:MF,	tetrapyrrole binding	GO:0046906	1	0	152	110	3	20171	HBB,HRG,HBD
GO:MF,	carboxylic acid transmembrane transporter activity	GO:0046943	1	0	160	110	1	20171	CD36
GO:MF,	histone H3K9 methyltransferase activity	GO:0046974	1	0	10	110	1	20171	ASH1L
GO:MF,	histone H3K36 methyltransferase activity	GO:0046975	1	0	11	110	1	20171	ASH1L
GO:MF,	protein heterodimerization activity	GO:0046982	1	0	357	110	1	20171	GCA
GO:MF,	protein dimerization activity	GO:0046983	1	0	1088	110	10	20171	SERPINF2,CORO1A,MASP1,CDA,PECAM1,PTPA,GCA,STOM,TSG101,DPYD
GO:MF,	protein N-terminus binding	GO:0047485	1	0	107	110	1	20171	VWF
GO:MF,	deoxycytidine deaminase activity	GO:0047844	1	0	9	110	1	20171	CDA
GO:MF,	receptor ligand activity	GO:0048018	1	0	500	110	4	20171	PPBP,MANF,PF4,PF4V1
GO:MF,	monosaccharide binding	GO:0048029	1	0	74	110	2	20171	SELP,COLEC11
GO:MF,	CXCR3 chemokine receptor binding	GO:0048248	1	0	5	110	1	20171	PF4
GO:MF,	ephrin receptor binding	GO:0046875	1	0	30	110	1	20171	GRB2
GO:MF,	proteoglycan binding	GO:0043394	1	0	36	110	2	20171	HRG,PTPRC
GO:MF,	glycosphingolipid binding	GO:0043208	1	0	10	110	1	20171	SELP
GO:MF,	vascular endothelial growth factor receptor 2 binding	GO:0043184	1	0	9	110	1	20171	ITGB3
GO:MF,	signaling adaptor activity	GO:0035591	1	0	85	110	1	20171	GRB2
GO:MF,	purine ribonucleoside triphosphate binding	GO:0035639	1	0	1848	110	8	20171	VCP,PTPA,RAB27B,PTK2,RP2,PIK3C3,VPS4A,CKMT2
GO:MF,	deubiquitinase activator activity	GO:0035800	1	0	3	110	1	20171	VCP
GO:MF,	long-chain fatty acid binding	GO:0036041	1	0	15	110	2	20171	S100A8,S100A9
GO:MF,	small molecule binding	GO:0036094	1	0	2527	110	18	20171	VCP,HBB,SELP,HBD,LCN2,S100A8,RBP4,CDA,PTPA,S100A9,RAB27B,PTK2,COLEC11,RP2,DPYD,PIK3C3,VPS4A,CKMT2
GO:MF,	K48-linked polyubiquitin modification-dependent protein binding	GO:0036435	1	0	11	110	1	20171	VCP
GO:MF,	signaling receptor activity	GO:0038023	1	0	1489	110	9	20171	ITGB3,GP1BA,PTPN6,PECAM1,ITGB2,PTPRC,CD36,FCGR3B,IL6ST
GO:MF,	cargo receptor activity	GO:0038024	1	0	85	110	2	20171	ITGB2,CD36
GO:MF,	pattern recognition receptor activity	GO:0038187	1	0	28	110	1	20171	CD36
GO:MF,	histone methyltransferase activity	GO:0042054	1	0	61	110	1	20171	ASH1L
GO:MF,	peptide binding	GO:0042277	1	0	323	110	2	20171	ITGB2,CD36
GO:MF,	MHC protein binding	GO:0042287	1	0	40	110	1	20171	VCP
GO:MF,	MHC class I protein binding	GO:0042288	1	0	21	110	1	20171	VCP
GO:MF,	chemokine receptor binding	GO:0042379	1	0	72	110	3	20171	PPBP,PF4,PF4V1
GO:MF,	phosphoric ester hydrolase activity	GO:0042578	1	0	381	110	4	20171	PTPN6,PTPA,PTPRC,PTK2
GO:MF,	histone H3K4 methyltransferase activity	GO:0042800	1	0	19	110	1	20171	ASH1L
GO:MF,	protein homodimerization activity	GO:0042803	1	0	701	110	10	20171	SERPINF2,CORO1A,MASP1,CDA,PECAM1,PTPA,GCA,STOM,TSG101,DPYD
GO:MF,	actinin binding	GO:0042805	1	0	37	110	1	20171	PDLIM1
GO:MF,	peptidoglycan binding	GO:0042834	1	0	17	110	1	20171	IGHM
GO:MF,	tumor necrosis factor binding	GO:0043120	1	0	5	110	1	20171	A2M
GO:MF,	neurotrophin binding	GO:0043121	1	0	10	110	1	20171	A2M
GO:MF,	ubiquitin binding	GO:0043130	1	0	97	110	1	20171	TSG101
GO:MF,	anion binding	GO:0043168	1	0	2426	110	15	20171	VCP,SELP,LCN2,S100A8,PTPA,IQGAP2,S100A9,RAB27B,PTK2,RP2,ASAP1,DPYD,PIK3C3,VPS4A,CKMT2
GO:MF,	organic acid binding	GO:0043177	1	0	140	110	4	20171	HBB,HBD,S100A8,S100A9
GO:MF,	alcohol binding	GO:0043178	1	0	90	110	1	20171	RBP4
GO:MF,	glutamate receptor binding	GO:0035254	1	0	45	110	1	20171	CANX
GO:BP,	humoral immune response	GO:0006959	3.4087111294112877e-26	25.467409801416558	320	110	30	21128	A2M,FGB,FGA,C4A,IGHM,IGHG2,C4BPA,LTF,HRG,IGHG4,S100A12,PPBP,CFHR1,IGLC2,MASP1,PTPN6,CFHR2,PF4,S100A9,PF4V1,LYZ,PTPRC,IGHV3-23,IGHV3-7,COLEC11,C4BPB,IGHV5-51,IGHV2-26,IGHV2-70D,MASP2
GO:BP,	immune system process	GO:0002376	6.033784791814377e-19	18.21941018395126	2683	110	56	21128	A2M,FGB,FGA,C4A,PLG,LCP1,IGHM,IGHG2,C4BPA,LTF,HRG,IGHG4,ITGB3,SELP,S100A12,LCN2,FGL1,AZGP1,GP1BA,PPBP,ENDOD1,CORO1A,CFHR1,IGLC2,MASP1,S100A8,RBP4,PTPN6,MMP8,UNC13D,PECAM1,CFHR2,PF4,ITGA6,SKAP2,S100A9,ITGB2,PF4V1,LYZ,STX7,PTPRC,IGHV3-23,PTK2,IGHV3-7,CD36,COLEC11,C4BPB,IGHV5-51,PITHD1,FCGR3B,IL6ST,IGKV4-1,IGHV2-26,IGHV2-70D,MASP2,IGLV3-10
GO:BP,	complement activation	GO:0006956	1.2563802324429076e-17	16.900878905295265	131	110	18	21128	A2M,C4A,IGHM,IGHG2,C4BPA,IGHG4,CFHR1,IGLC2,MASP1,CFHR2,IGHV3-23,IGHV3-7,COLEC11,C4BPB,IGHV5-51,IGHV2-26,IGHV2-70D,MASP2
GO:BP,	biological process involved in interspecies interaction between organisms	GO:0044419	7.515975767042726e-17	16.12401462881853	1724	110	44	21128	A2M,FGB,FGA,C4A,PLG,IGHM,IGHG2,C4BPA,LTF,HRG,IGHG4,ITGB3,SELP,S100A12,LCN2,PPBP,ENDOD1,CORO1A,CFHR1,IGLC2,MASP1,S100A8,PTPN6,UNC13D,CFHR2,PF4,S100A9,PF4V1,LYZ,PTPRC,IGHV3-23,PTK2,IGHV3-7,STOM,CD36,COLEC11,C4BPB,IGHV5-51,IGHV2-26,IGHV2-70D,TSG101,MASP2,PIK3C3,VPS4A
GO:BP,	defense response to other organism	GO:0098542	8.271175259728066e-17	16.082432776717013	1221	110	38	21128	A2M,FGB,FGA,C4A,IGHM,IGHG2,C4BPA,LTF,HRG,IGHG4,SELP,S100A12,LCN2,PPBP,ENDOD1,CORO1A,CFHR1,IGLC2,MASP1,S100A8,PTPN6,UNC13D,CFHR2,PF4,S100A9,PF4V1,LYZ,PTPRC,IGHV3-23,PTK2,IGHV3-7,CD36,COLEC11,C4BPB,IGHV5-51,IGHV2-26,IGHV2-70D,MASP2
GO:BP,	defense response	GO:0006952	3.288815502983119e-16	15.482960489023817	1791	110	44	21128	A2M,FGB,FGA,C4A,IGHM,IGHG2,C4BPA,LTF,HRG,SERPINF2,IGHG4,SELP,S100A12,LCN2,PPBP,ENDOD1,CORO1A,CFHR1,IGLC2,MASP1,S100A8,PTPN6,LSP1,MMP8,UNC13D,CFHR2,PF4,S100A9,ITGB2,PF4V1,LYZ,PTPRC,IGHV3-23,PTK2,IGHV3-7,CD36,COLEC11,C4BPB,IGHV5-51,IL6ST,IGHV2-26,IGHV2-70D,MASP2,ASH1L
GO:BP,	blood coagulation	GO:0007596	6.827647347710399e-16	15.165728918561786	228	110	20	21128	FGB,VWF,FGG,FGA,PLG,HBB,HRG,SERPINF2,ITGB3,SELP,F13B,GP5,GP1BA,PTPN6,CPB2,PF4,PF4V1,CD36,C4BPB,IL6ST
GO:BP,	immune response	GO:0006955	7.039453178022455e-16	15.152461075373646	1922	110	45	21128	A2M,FGB,FGA,C4A,LCP1,IGHM,IGHG2,C4BPA,LTF,HRG,IGHG4,S100A12,LCN2,FGL1,PPBP,ENDOD1,CORO1A,CFHR1,IGLC2,MASP1,S100A8,PTPN6,UNC13D,CFHR2,PF4,S100A9,ITGB2,PF4V1,LYZ,STX7,PTPRC,IGHV3-23,PTK2,IGHV3-7,CD36,COLEC11,C4BPB,IGHV5-51,FCGR3B,IL6ST,IGKV4-1,IGHV2-26,IGHV2-70D,MASP2,IGLV3-10
GO:BP,	coagulation	GO:0050817	1.0520212483281094e-15	14.977975488377664	233	110	20	21128	FGB,VWF,FGG,FGA,PLG,HBB,HRG,SERPINF2,ITGB3,SELP,F13B,GP5,GP1BA,PTPN6,CPB2,PF4,PF4V1,CD36,C4BPB,IL6ST
GO:BP,	hemostasis	GO:0007599	1.1456341527458113e-15	14.940954047997149	234	110	20	21128	FGB,VWF,FGG,FGA,PLG,HBB,HRG,SERPINF2,ITGB3,SELP,F13B,GP5,GP1BA,PTPN6,CPB2,PF4,PF4V1,CD36,C4BPB,IL6ST
GO:BP,	phagocytosis	GO:0006909	1.1840610783631635e-15	14.926625894478033	313	110	22	21128	C4A,IGHM,IGHG2,C4BPA,IGHG4,ITGB3,BIN2,CORO1A,IGLC2,UNC13D,PECAM1,ITGB2,PTPRC,IGHV3-23,PTK2,IGHV3-7,CD36,COLEC11,C4BPB,IGHV5-51,IGHV2-26,IGHV2-70D
GO:BP,	response to stress	GO:0006950	3.5265532308681003e-15	14.452649556396777	3980	110	62	21128	A2M,FGB,VWF,FGG,FGA,C4A,PLG,VCP,IGHM,IGHG2,C4BPA,HBB,LTF,HRG,SERPINF2,IGHG4,ITGB3,SELP,PDLIM1,F13B,S100A12,LCN2,GP5,GP1BA,PPBP,ENDOD1,CORO1A,CFHR1,IGLC2,MASP1,S100A8,PTPN6,LSP1,CPB2,MANF,MMP8,UNC13D,CFHR2,CANX,PF4,GRB2,S100A9,ITGB2,PF4V1,LYZ,PTPRC,IGHV3-23,PTK2,IGHV3-7,CD36,COLEC11,C4BPB,IGHV5-51,GPX3,IL6ST,IGHV2-26,IGHV2-70D,MASP2,RWDD1,PIK3C3,VPS4A,ASH1L
GO:BP,	positive regulation of immune system process	GO:0002684	5.243636866577955e-15	14.280367391791648	1060	110	34	21128	A2M,C4A,IGHM,IGHG2,C4BPA,LTF,HRG,IGHG4,ITGB3,SELP,CORO1A,CFHR1,IGLC2,MASP1,RBP4,PTPN6,MMP8,UNC13D,CFHR2,PF4,ITGB2,STX7,PTPRC,IGHV3-23,PTK2,IGHV3-7,CD36,COLEC11,C4BPB,IGHV5-51,IL6ST,IGHV2-26,IGHV2-70D,MASP2
GO:BP,	response to stimulus	GO:0050896	1.2066546368332821e-14	13.918417013896137	9039	110	91	21128	A2M,FGB,VWF,FGG,FGA,C4A,PLG,LCP1,VCP,IGHM,IGHG2,C4BPA,HBB,LTF,HRG,SERPINF2,IGHG4,ITGB3,SELP,ITGA2B,BIN2,ARHGDIB,PDLIM1,CA2,HBD,RSU1,F13B,S100A12,LCN2,FGL1,AZGP1,GP5,GP1BA,PPBP,LIMS1,ENDOD1,CORO1A,CFHR1,IGLC2,MASP1,S100A8,RBP4,PTPN6,LSP1,CPB2,MANF,MMP8,UNC13D,CDA,PECAM1,CFHR2,CANX,PF4,ITGA6,GRB2,CPN1,IQGAP2,APOM,SKAP2,S100A9,ITGB2,PF4V1,LYZ,STX7,WBP2,RGS10,PTPRC,IGHV3-23,PTK2,S100A4,IGHV3-7,CD36,C…
GO:BP,	immune effector process	GO:0002252	1.8693864562940708e-14	13.728300908098667	684	110	28	21128	A2M,C4A,LCP1,IGHM,IGHG2,C4BPA,IGHG4,CORO1A,CFHR1,IGLC2,MASP1,RBP4,PTPN6,UNC13D,CFHR2,ITGB2,STX7,PTPRC,IGHV3-23,PTK2,IGHV3-7,CD36,COLEC11,C4BPB,IGHV5-51,IGHV2-26,IGHV2-70D,MASP2
GO:BP,	response to external stimulus	GO:0009605	2.1536766843531955e-14	13.66681949358236	2861	110	52	21128	A2M,FGB,FGG,FGA,C4A,PLG,IGHM,IGHG2,C4BPA,LTF,HRG,SERPINF2,IGHG4,ITGB3,SELP,BIN2,S100A12,LCN2,GP1BA,PPBP,ENDOD1,CORO1A,CFHR1,IGLC2,MASP1,S100A8,PTPN6,LSP1,CPB2,MMP8,UNC13D,CDA,CFHR2,PF4,S100A9,ITGB2,PF4V1,LYZ,PTPRC,IGHV3-23,PTK2,IGHV3-7,CD36,COLEC11,C4BPB,IGHV5-51,IL6ST,IGHV2-26,IGHV2-70D,MASP2,PIK3C3,ASH1L
GO:BP,	response to external biotic stimulus	GO:0043207	4.477401933518984e-14	13.348973917527612	1560	110	39	21128	A2M,FGB,FGA,C4A,IGHM,IGHG2,C4BPA,LTF,HRG,IGHG4,SELP,S100A12,LCN2,PPBP,ENDOD1,CORO1A,CFHR1,IGLC2,MASP1,S100A8,PTPN6,UNC13D,CDA,CFHR2,PF4,S100A9,PF4V1,LYZ,PTPRC,IGHV3-23,PTK2,IGHV3-7,CD36,COLEC11,C4BPB,IGHV5-51,IGHV2-26,IGHV2-70D,MASP2
GO:BP,	regulation of immune system process	GO:0002682	7.335218574465086e-14	13.134586940543294	1493	110	38	21128	A2M,C4A,IGHM,IGHG2,C4BPA,LTF,HRG,IGHG4,ITGB3,SELP,FGL1,GP1BA,CORO1A,CFHR1,IGLC2,MASP1,RBP4,PTPN6,MMP8,UNC13D,CFHR2,PF4,ITGB2,STX7,PTPRC,IGHV3-23,PTK2,IGHV3-7,CD36,COLEC11,C4BPB,IGHV5-51,PITHD1,FCGR3B,IL6ST,IGHV2-26,IGHV2-70D,MASP2
GO:BP,	humoral immune response mediated by circulating immunoglobulin	GO:0002455	8.969054134585192e-14	13.047253354702832	118	110	15	21128	C4A,IGHM,IGHG2,C4BPA,IGHG4,IGLC2,PTPN6,PTPRC,IGHV3-23,IGHV3-7,C4BPB,IGHV5-51,IGHV2-26,IGHV2-70D,MASP2
GO:BP,	response to biotic stimulus	GO:0009607	1.0126587550183746e-13	12.994536878213255	1598	110	39	21128	A2M,FGB,FGA,C4A,IGHM,IGHG2,C4BPA,LTF,HRG,IGHG4,SELP,S100A12,LCN2,PPBP,ENDOD1,CORO1A,CFHR1,IGLC2,MASP1,S100A8,PTPN6,UNC13D,CDA,CFHR2,PF4,S100A9,PF4V1,LYZ,PTPRC,IGHV3-23,PTK2,IGHV3-7,CD36,COLEC11,C4BPB,IGHV5-51,IGHV2-26,IGHV2-70D,MASP2
GO:BP,	wound healing	GO:0042060	1.2256646003154972e-13	12.911628357028391	440	110	23	21128	FGB,VWF,FGG,FGA,PLG,HBB,HRG,SERPINF2,ITGB3,SELP,F13B,GP5,GP1BA,S100A8,PTPN6,CPB2,PF4,PF4V1,PTK2,CD36,C4BPB,IL6ST,VPS4A
GO:BP,	regulation of immune response	GO:0050776	2.92787057285439e-13	12.533448125269897	901	110	30	21128	A2M,C4A,IGHM,IGHG2,C4BPA,LTF,HRG,IGHG4,FGL1,CFHR1,IGLC2,MASP1,PTPN6,UNC13D,CFHR2,ITGB2,STX7,PTPRC,IGHV3-23,PTK2,IGHV3-7,CD36,COLEC11,C4BPB,IGHV5-51,FCGR3B,IL6ST,IGHV2-26,IGHV2-70D,MASP2
GO:BP,	response to other organism	GO:0051707	2.9350995962867364e-13	12.532377157317944	1557	110	38	21128	A2M,FGB,FGA,C4A,IGHM,IGHG2,C4BPA,LTF,HRG,IGHG4,SELP,S100A12,LCN2,PPBP,ENDOD1,CORO1A,CFHR1,IGLC2,MASP1,S100A8,PTPN6,UNC13D,CFHR2,PF4,S100A9,PF4V1,LYZ,PTPRC,IGHV3-23,PTK2,IGHV3-7,CD36,COLEC11,C4BPB,IGHV5-51,IGHV2-26,IGHV2-70D,MASP2
GO:BP,	positive regulation of response to stimulus	GO:0048584	4.076763386149779e-13	12.389684494108677	2267	110	45	21128	A2M,FGB,VWF,FGG,FGA,C4A,PLG,VCP,IGHM,IGHG2,C4BPA,LTF,HRG,SERPINF2,IGHG4,ITGB3,SELP,S100A12,LIMS1,CFHR1,IGLC2,MASP1,S100A8,PTPN6,CPB2,MMP8,CFHR2,S100A9,ITGB2,STX7,WBP2,PTPRC,IGHV3-23,PTK2,S100A4,IGHV3-7,CD36,COLEC11,C4BPB,IGHV5-51,TGFB1I1,IL6ST,IGHV2-26,IGHV2-70D,MASP2
GO:BP,	regulation of response to stimulus	GO:0048583	6.760053577632021e-13	12.170049861990652	3998	110	59	21128	A2M,FGB,VWF,FGG,FGA,C4A,PLG,VCP,IGHM,IGHG2,C4BPA,LTF,HRG,SERPINF2,IGHG4,ITGB3,SELP,ARHGDIB,S100A12,FGL1,GP1BA,LIMS1,CFHR1,IGLC2,MASP1,S100A8,PTPN6,CPB2,MANF,MMP8,UNC13D,CFHR2,PF4,ITGA6,GRB2,S100A9,ITGB2,STX7,WBP2,RGS10,PTPRC,IGHV3-23,PTK2,S100A4,IGHV3-7,CD36,COLEC11,C4BPB,IGHV5-51,TGFB1I1,FCGR3B,IL6ST,IGHV2-26,IGHV2-70D,TSG101,MASP2,GRAP2,RWDD1,ASH1L
GO:BP,	positive regulation of immune response	GO:0050778	7.242428943335769e-13	12.140115757038052	721	110	27	21128	A2M,C4A,IGHM,IGHG2,C4BPA,LTF,HRG,IGHG4,CFHR1,IGLC2,MASP1,PTPN6,CFHR2,ITGB2,STX7,PTPRC,IGHV3-23,PTK2,IGHV3-7,CD36,COLEC11,C4BPB,IGHV5-51,IL6ST,IGHV2-26,IGHV2-70D,MASP2
GO:BP,	cell activation	GO:0001775	3.0940368150251786e-12	11.509474523064846	1142	110	32	21128	FGB,VWF,FGG,FGA,LCP1,IGHM,IGHG2,HBB,HRG,IGHG4,ITGB3,SELP,S100A12,FGL1,GP5,GP1BA,CORO1A,IGLC2,PTPN6,MMP8,UNC13D,PF4,SKAP2,ITGB2,PF4V1,PTPRC,IGHV3-23,IGHV3-7,IGHV5-51,IL6ST,IGHV2-26,IGHV2-70D
GO:BP,	regulation of body fluid levels	GO:0050878	7.32135316211236e-12	11.135408643459733	367	110	20	21128	FGB,VWF,FGG,FGA,PLG,HBB,HRG,SERPINF2,ITGB3,SELP,F13B,GP5,GP1BA,PTPN6,CPB2,PF4,PF4V1,CD36,C4BPB,IL6ST
GO:BP,	activation of immune response	GO:0002253	8.66802061997927e-12	11.062080064226636	536	110	23	21128	A2M,C4A,IGHM,IGHG2,C4BPA,LTF,IGHG4,CFHR1,IGLC2,MASP1,PTPN6,CFHR2,PTPRC,IGHV3-23,PTK2,IGHV3-7,CD36,COLEC11,C4BPB,IGHV5-51,IGHV2-26,IGHV2-70D,MASP2
GO:BP,	phagocytosis, recognition	GO:0006910	1.1732347870862819e-11	10.93061506841938	102	110	13	21128	IGHM,IGHG2,C4BPA,IGHG4,IGLC2,IGHV3-23,IGHV3-7,CD36,COLEC11,C4BPB,IGHV5-51,IGHV2-26,IGHV2-70D
GO:BP,	defense response to bacterium	GO:0042742	1.3488350062608589e-11	10.870041171345786	379	110	20	21128	FGB,FGA,IGHM,IGHG2,LTF,IGHG4,SELP,S100A12,LCN2,PPBP,IGLC2,S100A8,S100A9,LYZ,IGHV3-23,IGHV3-7,CD36,IGHV5-51,IGHV2-26,IGHV2-70D
GO:BP,	platelet activation	GO:0030168	1.7287833286436243e-11	10.762259434181843	134	110	14	21128	FGB,VWF,FGG,FGA,HBB,HRG,ITGB3,SELP,GP5,GP1BA,PTPN6,PF4,PF4V1,IL6ST
GO:BP,	complement activation, classical pathway	GO:0006958	1.7289901494995063e-11	10.76220748100612	105	110	13	21128	C4A,IGHM,IGHG2,C4BPA,IGHG4,IGLC2,IGHV3-23,IGHV3-7,C4BPB,IGHV5-51,IGHV2-26,IGHV2-70D,MASP2
GO:BP,	innate immune response	GO:0045087	2.0932127055778588e-11	10.67918663780319	978	110	29	21128	A2M,FGB,FGA,C4A,IGHM,IGHG2,C4BPA,LTF,IGHG4,S100A12,LCN2,ENDOD1,CORO1A,IGLC2,MASP1,S100A8,PTPN6,UNC13D,S100A9,IGHV3-23,PTK2,IGHV3-7,CD36,COLEC11,C4BPB,IGHV5-51,IGHV2-26,IGHV2-70D,MASP2
GO:BP,	response to wounding	GO:0009611	3.7101055737420034e-11	10.430613732045	574	110	23	21128	FGB,VWF,FGG,FGA,PLG,HBB,HRG,SERPINF2,ITGB3,SELP,F13B,GP5,GP1BA,S100A8,PTPN6,CPB2,PF4,PF4V1,PTK2,CD36,C4BPB,IL6ST,VPS4A
GO:BP,	vesicle-mediated transport	GO:0016192	5.997552887698852e-11	10.222025913642	1638	110	36	21128	FGB,FGG,FGA,C4A,VCP,IGHM,IGHG2,C4BPA,IGHG4,ITGB3,BIN2,CORO1A,IGLC2,UNC13D,PECAM1,CANX,GRB2,ITGB2,STX7,RAB27B,PTPRC,IGHV3-23,PTK2,IGHV3-7,CD36,COLEC11,C4BPB,IGHV5-51,RP2,RUFY1,ITSN2,IGHV2-26,IGHV2-70D,TSG101,PIK3C3,VPS4A
GO:BP,	positive regulation of biological process	GO:0048518	1.3892503805619705e-10	9.857219475574837	6348	110	71	21128	A2M,FGB,VWF,FGG,FGA,C4A,PLG,LCP1,VCP,IGHM,IGHG2,C4BPA,HBB,LTF,HRG,SERPINF2,IGHG4,ITGB3,SELP,PDLIM1,CA2,HBD,RSU1,S100A12,LCN2,GP5,GP1BA,PPBP,LIMS1,CORO1A,CFHR1,IGLC2,MASP1,S100A8,RBP4,PTPN6,CPB2,MMP8,UNC13D,PECAM1,CFHR2,PF4,ITGA6,GRB2,PTPA,S100A9,ITGB2,STX7,WBP2,RAB27B,PTPRC,IGHV3-23,PTK2,S100A4,IGHV3-7,STOM,CD36,COLEC11,C4BPB,IGHV5-51,PITHD1,TGFB1I1,IL6ST,ITSN2,IGHV2-26,IGHV2-70D,TSG101,MASP2,ASA…
GO:BP,	immunoglobulin mediated immune response	GO:0016064	1.902444747250402e-10	9.720687947599552	196	110	15	21128	C4A,IGHM,IGHG2,C4BPA,IGHG4,IGLC2,PTPN6,PTPRC,IGHV3-23,IGHV3-7,C4BPB,IGHV5-51,IGHV2-26,IGHV2-70D,MASP2
GO:BP,	B cell mediated immunity	GO:0019724	2.3791466930986934e-10	9.623578779467902	199	110	15	21128	C4A,IGHM,IGHG2,C4BPA,IGHG4,IGLC2,PTPN6,PTPRC,IGHV3-23,IGHV3-7,C4BPB,IGHV5-51,IGHV2-26,IGHV2-70D,MASP2
GO:BP,	lymphocyte mediated immunity	GO:0002449	4.5696957860234814e-10	9.34011271083801	347	110	18	21128	C4A,IGHM,IGHG2,C4BPA,IGHG4,CORO1A,IGLC2,PTPN6,UNC13D,STX7,PTPRC,IGHV3-23,IGHV3-7,C4BPB,IGHV5-51,IGHV2-26,IGHV2-70D,MASP2
GO:BP,	endocytosis	GO:0006897	6.890683951274405e-10	9.161737669018011	660	110	23	21128	IGHM,IGHG2,C4BPA,IGHG4,ITGB3,BIN2,IGLC2,CANX,GRB2,ITGB2,RAB27B,IGHV3-23,IGHV3-7,CD36,COLEC11,C4BPB,IGHV5-51,RUFY1,ITSN2,IGHV2-26,IGHV2-70D,TSG101,PIK3C3
GO:BP,	fibrinolysis	GO:0042730	1.5782608306858221e-9	8.801821221680033	27	110	8	21128	FGB,FGG,FGA,PLG,HRG,SERPINF2,GP1BA,CPB2
GO:BP,	response to bacterium	GO:0009617	2.2617598885375955e-9	8.645553502247951	772	110	24	21128	FGB,FGA,IGHM,IGHG2,C4BPA,LTF,IGHG4,SELP,S100A12,LCN2,PPBP,IGLC2,S100A8,PF4,S100A9,PF4V1,LYZ,IGHV3-23,IGHV3-7,CD36,C4BPB,IGHV5-51,IGHV2-26,IGHV2-70D
GO:BP,	leukocyte mediated immunity	GO:0002443	2.826815020617639e-9	8.548702609675829	444	110	19	21128	C4A,IGHM,IGHG2,C4BPA,IGHG4,CORO1A,IGLC2,PTPN6,UNC13D,ITGB2,STX7,PTPRC,IGHV3-23,IGHV3-7,C4BPB,IGHV5-51,IGHV2-26,IGHV2-70D,MASP2
GO:BP,	adaptive immune response	GO:0002250	4.012811010883986e-9	8.396551293508862	719	110	23	21128	FGB,FGA,C4A,IGHM,IGHG2,C4BPA,IGHG4,FGL1,IGLC2,PTPN6,UNC13D,STX7,PTPRC,IGHV3-23,IGHV3-7,C4BPB,IGHV5-51,IL6ST,IGKV4-1,IGHV2-26,IGHV2-70D,MASP2,IGLV3-10
GO:BP,	antimicrobial humoral response	GO:0019730	4.718561675773081e-9	8.326190363965475	126	110	12	21128	FGB,FGA,IGHM,LTF,HRG,S100A12,PPBP,PF4,S100A9,PF4V1,LYZ,COLEC11
GO:BP,	phagocytosis, engulfment	GO:0006911	5.188565217017883e-9	8.284952720085785	127	110	12	21128	IGHM,IGHG2,IGHG4,BIN2,IGLC2,ITGB2,IGHV3-23,IGHV3-7,CD36,IGHV5-51,IGHV2-26,IGHV2-70D
GO:BP,	adaptive immune response based on somatic recombination of immune receptors built from immunoglobulin superfamily domains	GO:0002460	8.017246273259179e-9	8.09597477556754	355	110	17	21128	C4A,IGHM,IGHG2,C4BPA,IGHG4,IGLC2,PTPN6,UNC13D,STX7,PTPRC,IGHV3-23,IGHV3-7,C4BPB,IGHV5-51,IGHV2-26,IGHV2-70D,MASP2
GO:BP,	plasma membrane invagination	GO:0099024	1.1773974309114344e-8	7.929076916156094	136	110	12	21128	IGHM,IGHG2,IGHG4,BIN2,IGLC2,ITGB2,IGHV3-23,IGHV3-7,CD36,IGHV5-51,IGHV2-26,IGHV2-70D
GO:BP,	membrane invagination	GO:0010324	2.139587385231253e-8	7.669669971321332	143	110	12	21128	IGHM,IGHG2,IGHG4,BIN2,IGLC2,ITGB2,IGHV3-23,IGHV3-7,CD36,IGHV5-51,IGHV2-26,IGHV2-70D
GO:BP,	regulation of cell activation	GO:0050865	2.6199928278840983e-8	7.581699897540798	713	110	22	21128	FGG,IGHM,IGHG2,HRG,IGHG4,SELP,FGL1,GP5,GP1BA,CORO1A,IGLC2,PTPN6,MMP8,UNC13D,ITGB2,PTPRC,IGHV3-23,IGHV3-7,IGHV5-51,IL6ST,IGHV2-26,IGHV2-70D
GO:BP,	cell recognition	GO:0008037	2.9819750800861126e-8	7.525495990201036	230	110	14	21128	IGHM,IGHG2,C4BPA,IGHG4,IGLC2,PECAM1,IGHV3-23,IGHV3-7,CD36,COLEC11,C4BPB,IGHV5-51,IGHV2-26,IGHV2-70D
GO:BP,	cell adhesion	GO:0007155	4.217228320734626e-8	7.37497288564606	1521	110	31	21128	FGB,VWF,FGG,FGA,PLG,HBB,HRG,SERPINF2,ITGB3,SELP,ITGA2B,PDLIM1,RSU1,FGL1,AZGP1,GP5,GP1BA,LIMS1,CORO1A,S100A8,PTPN6,UNC13D,PECAM1,ITGA6,S100A9,ITGB2,PTPRC,PTK2,CD36,TGFB1I1,IL6ST
GO:BP,	positive regulation of cell activation	GO:0050867	5.08709315994467e-8	7.293530309060322	460	110	18	21128	IGHM,IGHG2,IGHG4,SELP,GP5,GP1BA,CORO1A,IGLC2,PTPN6,MMP8,ITGB2,PTPRC,IGHV3-23,IGHV3-7,IGHV5-51,IL6ST,IGHV2-26,IGHV2-70D
GO:BP,	B cell receptor signaling pathway	GO:0050853	1.2400278515342188e-7	6.906568560296003	128	110	11	21128	IGHM,IGHG2,IGHG4,IGLC2,PTPN6,PTPRC,IGHV3-23,IGHV3-7,IGHV5-51,IGHV2-26,IGHV2-70D
GO:BP,	positive regulation of multicellular organismal process	GO:0051240	1.3342933694215122e-7	6.87474867213364	1695	110	32	21128	FGB,FGG,FGA,PLG,IGHM,IGHG2,LTF,HRG,SERPINF2,IGHG4,ITGB3,SELP,LCN2,GP5,GP1BA,CORO1A,IGLC2,PTPN6,CPB2,MMP8,PF4,ITGB2,PTPRC,IGHV3-23,PTK2,IGHV3-7,CD36,IGHV5-51,TGFB1I1,IL6ST,IGHV2-26,IGHV2-70D
GO:BP,	cell-substrate adhesion	GO:0031589	1.4569312137806952e-7	6.8365609521288935	367	110	16	21128	FGB,VWF,FGG,FGA,PLG,HRG,ITGB3,ITGA2B,RSU1,LIMS1,CORO1A,UNC13D,ITGA6,ITGB2,PTK2,CD36
GO:BP,	regulation of blood coagulation	GO:0030193	1.862443154604144e-7	6.729916973891614	70	110	9	21128	FGB,FGG,FGA,PLG,HRG,SERPINF2,GP1BA,CPB2,CD36
GO:BP,	regulation of hemostasis	GO:1900046	2.4165478156315327e-7	6.616804607163017	72	110	9	21128	FGB,FGG,FGA,PLG,HRG,SERPINF2,GP1BA,CPB2,CD36
GO:BP,	positive regulation of cellular process	GO:0048522	3.407235155773268e-7	6.4675978918708035	5657	110	61	21128	FGB,VWF,FGG,FGA,LCP1,VCP,IGHM,IGHG2,HBB,LTF,HRG,SERPINF2,IGHG4,ITGB3,SELP,PDLIM1,CA2,HBD,RSU1,S100A12,GP5,GP1BA,PPBP,LIMS1,CORO1A,IGLC2,S100A8,RBP4,PTPN6,CPB2,MMP8,UNC13D,PECAM1,PF4,ITGA6,GRB2,PTPA,S100A9,ITGB2,STX7,WBP2,RAB27B,PTPRC,IGHV3-23,PTK2,S100A4,IGHV3-7,STOM,CD36,COLEC11,IGHV5-51,PITHD1,TGFB1I1,IL6ST,ITSN2,IGHV2-26,IGHV2-70D,TSG101,ASAP1,VPS4A,ASH1L
GO:BP,	negative regulation of blood coagulation	GO:0030195	3.4572387614112573e-7	6.461270626479363	50	110	8	21128	FGB,FGG,FGA,PLG,HRG,SERPINF2,GP1BA,CPB2
GO:BP,	regulation of coagulation	GO:0050818	3.5200971613017045e-7	6.453445349011975	75	110	9	21128	FGB,FGG,FGA,PLG,HRG,SERPINF2,GP1BA,CPB2,CD36
GO:BP,	blood coagulation, fibrin clot formation	GO:0072378	3.7954807706427576e-7	6.420733204534605	17	110	6	21128	FGB,FGG,FGA,F13B,GP5,GP1BA
GO:BP,	negative regulation of hemostasis	GO:1900047	4.082852106984418e-7	6.389036351226611	51	110	8	21128	FGB,FGG,FGA,PLG,HRG,SERPINF2,GP1BA,CPB2
GO:BP,	negative regulation of coagulation	GO:0050819	6.585843608725336e-7	6.181388586511149	54	110	8	21128	FGB,FGG,FGA,PLG,HRG,SERPINF2,GP1BA,CPB2
GO:BP,	positive regulation of cell adhesion	GO:0045785	8.036518432223571e-7	6.0949320548765575	477	110	17	21128	FGB,FGG,FGA,HRG,SERPINF2,ITGB3,SELP,RSU1,GP1BA,LIMS1,CORO1A,PTPN6,UNC13D,ITGB2,PTPRC,CD36,IL6ST
GO:BP,	cell-cell adhesion	GO:0098609	9.929331931297945e-7	6.003079970871307	948	110	23	21128	FGB,FGG,FGA,PLG,HBB,SERPINF2,ITGB3,SELP,ITGA2B,PDLIM1,FGL1,GP1BA,LIMS1,CORO1A,S100A8,PTPN6,PECAM1,ITGA6,S100A9,ITGB2,PTPRC,PTK2,IL6ST
GO:BP,	protein activation cascade	GO:0072376	0.0000011737162125258423	5.930436896472189	20	110	6	21128	FGB,FGG,FGA,F13B,GP5,GP1BA
GO:BP,	establishment of localization	GO:0051234	0.0000018470505667515458	5.733521214705644	4933	110	55	21128	FGB,FGG,FGA,C4A,LCP1,VCP,IGHM,IGHG2,C4BPA,HBB,LTF,HRG,IGHG4,ITGB3,BIN2,CA2,HBD,LCN2,AZGP1,GP5,GP1BA,PPBP,LIMS1,CORO1A,IGLC2,S100A8,RBP4,PTPN6,CPB2,UNC13D,PECAM1,CANX,GRB2,APOM,ITGB2,STX7,WBP2,RAB27B,PTPRC,IGHV3-23,PTK2,IGHV3-7,STOM,CD36,COLEC11,C4BPB,IGHV5-51,RP2,RUFY1,ITSN2,IGHV2-26,IGHV2-70D,TSG101,PIK3C3,VPS4A
GO:BP,	regulation of wound healing	GO:0061041	0.0000028280185233743515	5.548517750259537	130	110	10	21128	FGB,FGG,FGA,PLG,HRG,SERPINF2,GP1BA,CPB2,PTK2,CD36
GO:BP,	leukocyte migration	GO:0050900	0.00000454446678630246	5.342517066314716	399	110	15	21128	PLG,ITGB3,SELP,S100A12,GP1BA,PPBP,CORO1A,S100A8,PECAM1,PF4,ITGA6,S100A9,ITGB2,PF4V1,PTK2
GO:BP,	signal transduction	GO:0007165	0.0000047150215511538175	5.3265163178734625	6012	110	61	21128	FGB,VWF,FGG,FGA,LCP1,VCP,IGHM,IGHG2,LTF,HRG,SERPINF2,IGHG4,ITGB3,SELP,ITGA2B,ARHGDIB,CA2,RSU1,S100A12,GP1BA,PPBP,LIMS1,CORO1A,IGLC2,S100A8,PTPN6,LSP1,MANF,MMP8,CDA,PECAM1,PF4,ITGA6,GRB2,IQGAP2,SKAP2,S100A9,ITGB2,PF4V1,WBP2,RGS10,PTPRC,IGHV3-23,PTK2,S100A4,IGHV3-7,CD36,COLEC11,IGHV5-51,TGFB1I1,FCGR3B,IL6ST,RUFY1,IGHV2-26,IGHV2-70D,TSG101,GRAP2,RWDD1,PIK3C3,VPS4A,ASH1L
GO:BP,	immune response-activating cell surface receptor signaling pathway	GO:0002429	0.000005661124193686217	5.247097317462876	343	110	14	21128	IGHM,IGHG2,LTF,IGHG4,IGLC2,PTPN6,PTPRC,IGHV3-23,PTK2,IGHV3-7,COLEC11,IGHV5-51,IGHV2-26,IGHV2-70D
GO:BP,	transport	GO:0006810	0.0000057575328902096585	5.23976357242656	4773	110	53	21128	FGB,FGG,FGA,C4A,LCP1,VCP,IGHM,IGHG2,C4BPA,HBB,LTF,HRG,IGHG4,ITGB3,BIN2,CA2,HBD,LCN2,AZGP1,GP5,GP1BA,PPBP,CORO1A,IGLC2,S100A8,RBP4,PTPN6,CPB2,UNC13D,PECAM1,CANX,GRB2,APOM,ITGB2,STX7,RAB27B,PTPRC,IGHV3-23,PTK2,IGHV3-7,STOM,CD36,COLEC11,C4BPB,IGHV5-51,RP2,RUFY1,ITSN2,IGHV2-26,IGHV2-70D,TSG101,PIK3C3,VPS4A
GO:BP,	regulation of cell adhesion	GO:0030155	0.000005792192759369702	5.2371569936103555	777	110	20	21128	FGB,FGG,FGA,PLG,HRG,SERPINF2,ITGB3,SELP,RSU1,FGL1,GP1BA,LIMS1,CORO1A,PTPN6,UNC13D,ITGB2,PTPRC,PTK2,CD36,IL6ST
GO:BP,	platelet aggregation	GO:0070527	0.000007011868786708956	5.154166219466639	72	110	8	21128	FGB,FGG,FGA,HBB,ITGB3,GP1BA,PTPN6,IL6ST
GO:BP,	negative regulation of wound healing	GO:0061045	0.00000784108941018236	5.105623593953042	73	110	8	21128	FGB,FGG,FGA,PLG,HRG,SERPINF2,GP1BA,CPB2
GO:BP,	signaling	GO:0023052	0.00001044100678820514	4.9812576218816105	6462	110	63	21128	FGB,VWF,FGG,FGA,PLG,LCP1,VCP,IGHM,IGHG2,LTF,HRG,SERPINF2,IGHG4,ITGB3,SELP,ITGA2B,ARHGDIB,CA2,RSU1,S100A12,GP1BA,PPBP,LIMS1,CORO1A,IGLC2,S100A8,RBP4,PTPN6,LSP1,MANF,MMP8,CDA,PECAM1,PF4,ITGA6,GRB2,IQGAP2,SKAP2,S100A9,ITGB2,PF4V1,WBP2,RGS10,PTPRC,IGHV3-23,PTK2,S100A4,IGHV3-7,CD36,COLEC11,IGHV5-51,TGFB1I1,FCGR3B,IL6ST,RUFY1,IGHV2-26,IGHV2-70D,TSG101,GRAP2,RWDD1,PIK3C3,VPS4A,ASH1L
GO:BP,	immune response-regulating cell surface receptor signaling pathway	GO:0002768	0.000015374861244588662	4.81318879496597	371	110	14	21128	IGHM,IGHG2,LTF,IGHG4,IGLC2,PTPN6,PTPRC,IGHV3-23,PTK2,IGHV3-7,COLEC11,IGHV5-51,IGHV2-26,IGHV2-70D
GO:BP,	positive regulation of B cell activation	GO:0050871	0.000016625674034396275	4.779220738597192	156	110	10	21128	IGHM,IGHG2,IGHG4,IGLC2,PTPRC,IGHV3-23,IGHV3-7,IGHV5-51,IGHV2-26,IGHV2-70D
GO:BP,	regulation of B cell activation	GO:0050864	0.00001691323861915895	4.771773223877219	203	110	11	21128	IGHM,IGHG2,IGHG4,IGLC2,PTPN6,PTPRC,IGHV3-23,IGHV3-7,IGHV5-51,IGHV2-26,IGHV2-70D
GO:BP,	positive regulation of leukocyte activation	GO:0002696	0.000019142363469202528	4.7180044417805	444	110	15	21128	IGHM,IGHG2,IGHG4,CORO1A,IGLC2,PTPN6,MMP8,ITGB2,PTPRC,IGHV3-23,IGHV3-7,IGHV5-51,IL6ST,IGHV2-26,IGHV2-70D
GO:BP,	cell communication	GO:0007154	0.000021707016237208105	4.663399868888821	6573	110	63	21128	FGB,VWF,FGG,FGA,PLG,LCP1,VCP,IGHM,IGHG2,LTF,HRG,SERPINF2,IGHG4,ITGB3,SELP,ITGA2B,ARHGDIB,CA2,RSU1,S100A12,GP1BA,PPBP,LIMS1,CORO1A,IGLC2,S100A8,RBP4,PTPN6,LSP1,MANF,MMP8,CDA,PECAM1,PF4,ITGA6,GRB2,IQGAP2,SKAP2,S100A9,ITGB2,PF4V1,WBP2,RGS10,PTPRC,IGHV3-23,PTK2,S100A4,IGHV3-7,CD36,COLEC11,IGHV5-51,TGFB1I1,FCGR3B,IL6ST,RUFY1,IGHV2-26,IGHV2-70D,TSG101,GRAP2,RWDD1,PIK3C3,VPS4A,ASH1L
GO:BP,	regulation of response to wounding	GO:1903034	0.000023892766633548362	4.621733558742556	162	110	10	21128	FGB,FGG,FGA,PLG,HRG,SERPINF2,GP1BA,CPB2,PTK2,CD36
GO:BP,	cellular response to stimulus	GO:0051716	0.0000284456450903721	4.545984212853771	7491	110	68	21128	FGB,VWF,FGG,FGA,LCP1,VCP,IGHM,IGHG2,HBB,LTF,HRG,SERPINF2,IGHG4,ITGB3,SELP,ITGA2B,BIN2,ARHGDIB,CA2,HBD,RSU1,S100A12,GP1BA,PPBP,LIMS1,CORO1A,IGLC2,S100A8,PTPN6,LSP1,CPB2,MANF,MMP8,CDA,PECAM1,CANX,PF4,ITGA6,GRB2,IQGAP2,APOM,SKAP2,S100A9,ITGB2,PF4V1,WBP2,RGS10,PTPRC,IGHV3-23,PTK2,S100A4,IGHV3-7,CD36,COLEC11,IGHV5-51,TGFB1I1,GPX3,FCGR3B,IL6ST,RUFY1,IGHV2-26,IGHV2-70D,TSG101,GRAP2,RWDD1,PIK3C3,VPS4A,AS…
GO:BP,	positive regulation of exocytosis	GO:0045921	0.00003209499799485531	4.493562647112381	87	110	8	21128	FGB,FGG,FGA,UNC13D,ITGB2,RAB27B,TSG101,VPS4A
GO:BP,	regulation of cell-substrate adhesion	GO:0010810	0.00003218989190952486	4.492280481629879	216	110	11	21128	FGB,FGG,FGA,PLG,HRG,ITGB3,RSU1,LIMS1,UNC13D,PTK2,CD36
GO:BP,	immune response-activating signaling pathway	GO:0002757	0.000032474803721921374	4.488453465127731	462	110	15	21128	IGHM,IGHG2,LTF,IGHG4,IGLC2,PTPN6,PTPRC,IGHV3-23,PTK2,IGHV3-7,CD36,COLEC11,IGHV5-51,IGHV2-26,IGHV2-70D
GO:BP,	positive regulation of cell-substrate adhesion	GO:0010811	0.00003703912012776141	4.431339338626083	126	110	9	21128	FGB,FGG,FGA,HRG,ITGB3,RSU1,LIMS1,UNC13D,CD36
GO:BP,	negative regulation of response to wounding	GO:1903035	0.00003845936614990416	4.414997877660394	89	110	8	21128	FGB,FGG,FGA,PLG,HRG,SERPINF2,GP1BA,CPB2
GO:BP,	membrane organization	GO:0061024	0.00005227308082746249	4.281721903060135	886	110	20	21128	IGHM,IGHG2,IGHG4,BIN2,CORO1A,IGLC2,S100A9,GCA,ITGB2,STX7,PTPRC,IGHV3-23,IGHV3-7,CD36,IGHV5-51,IGHV2-26,IGHV2-70D,TSG101,ASAP1,VPS4A
GO:BP,	regulation of substrate adhesion-dependent cell spreading	GO:1900024	0.00005479328592674843	4.261272654355144	61	110	7	21128	FGB,FGG,FGA,ITGB3,LIMS1,UNC13D,PTK2
GO:BP,	localization	GO:0051179	0.00006507150358680854	4.186609158043928	5578	110	56	21128	FGB,FGG,FGA,C4A,LCP1,VCP,IGHM,IGHG2,C4BPA,HBB,LTF,HRG,IGHG4,ITGB3,BIN2,CA2,HBD,LCN2,AZGP1,GP5,GP1BA,PPBP,LIMS1,CORO1A,IGLC2,S100A8,RBP4,PTPN6,CPB2,UNC13D,PECAM1,CANX,GRB2,APOM,S100A9,ITGB2,STX7,WBP2,RAB27B,PTPRC,IGHV3-23,PTK2,IGHV3-7,STOM,CD36,COLEC11,C4BPB,IGHV5-51,RP2,RUFY1,ITSN2,IGHV2-26,IGHV2-70D,TSG101,PIK3C3,VPS4A
GO:BP,	homotypic cell-cell adhesion	GO:0034109	0.00007006880225403944	4.154475306209967	96	110	8	21128	FGB,FGG,FGA,HBB,ITGB3,GP1BA,PTPN6,IL6ST
GO:BP,	immune response-regulating signaling pathway	GO:0002764	0.00007056609889663294	4.151403890990066	490	110	15	21128	IGHM,IGHG2,LTF,IGHG4,IGLC2,PTPN6,PTPRC,IGHV3-23,PTK2,IGHV3-7,CD36,COLEC11,IGHV5-51,IGHV2-26,IGHV2-70D
GO:BP,	negative regulation of humoral immune response	GO:0002921	0.00007091396824259075	4.149268211457503	19	110	5	21128	A2M,C4BPA,MASP1,PTPN6,C4BPB
GO:BP,	cell-matrix adhesion	GO:0007160	0.00008717187023227561	4.059623636326552	238	110	11	21128	FGB,FGG,FGA,HRG,ITGB3,ITGA2B,LIMS1,ITGA6,ITGB2,PTK2,CD36
GO:BP,	regulation of biological process	GO:0050789	0.0000918675078856933	4.03683806468681	12378	110	91	21128	A2M,FGB,VWF,FGG,FGA,C4A,PLG,LCP1,VCP,IGHM,IGHG2,C4BPA,HBB,LTF,HRG,SERPINF2,IGHG4,ITGB3,SELP,ITGA2B,ARHGDIB,PDLIM1,CA2,HBD,RSU1,S100A12,LCN2,FGL1,AZGP1,GP5,GP1BA,PPBP,LIMS1,CORO1A,CFHR1,IGLC2,MASP1,S100A8,RBP4,PTPN6,LSP1,CPB2,MANF,MMP8,UNC13D,CDA,PECAM1,CFHR2,PF4,ITGA6,H1-4,GRB2,PTPA,IQGAP2,APOM,SKAP2,S100A9,ITGB2,PF4V1,STX7,WBP2,RAB27B,RGS10,PTPRC,IGHV3-23,PTK2,S100A4,IGHV3-7,STOM,CD36,COLEC11,C4…
GO:BP,	regulation of leukocyte activation	GO:0002694	0.00009585749267798076	4.018373934934868	658	110	17	21128	IGHM,IGHG2,IGHG4,FGL1,CORO1A,IGLC2,PTPN6,MMP8,UNC13D,ITGB2,PTPRC,IGHV3-23,IGHV3-7,IGHV5-51,IL6ST,IGHV2-26,IGHV2-70D
GO:BP,	antigen receptor-mediated signaling pathway	GO:0050851	0.00011235934991327361	3.949390782196472	244	110	11	21128	IGHM,IGHG2,IGHG4,IGLC2,PTPN6,PTPRC,IGHV3-23,IGHV3-7,IGHV5-51,IGHV2-26,IGHV2-70D
GO:BP,	cell surface receptor signaling pathway	GO:0007166	0.00012021379156727333	3.920045704895917	2869	110	37	21128	FGB,FGG,FGA,VCP,IGHM,IGHG2,LTF,HRG,IGHG4,ITGB3,ITGA2B,GP1BA,PPBP,LIMS1,CORO1A,IGLC2,PTPN6,CDA,PECAM1,PF4,ITGA6,GRB2,ITGB2,PF4V1,PTPRC,IGHV3-23,PTK2,IGHV3-7,CD36,COLEC11,IGHV5-51,TGFB1I1,FCGR3B,IL6ST,IGHV2-26,IGHV2-70D,TSG101
GO:BP,	regulation of multicellular organismal process	GO:0051239	0.00012288359925549018	3.910506076659031	3004	110	38	21128	FGB,FGG,FGA,PLG,IGHM,IGHG2,LTF,HRG,SERPINF2,IGHG4,ITGB3,SELP,ARHGDIB,LCN2,FGL1,GP5,GP1BA,CORO1A,IGLC2,RBP4,PTPN6,CPB2,MMP8,UNC13D,PF4,APOM,ITGB2,PTPRC,IGHV3-23,PTK2,IGHV3-7,CD36,IGHV5-51,PITHD1,TGFB1I1,IL6ST,IGHV2-26,IGHV2-70D
GO:BP,	regulation of response to external stimulus	GO:0032101	0.00012746709860928223	3.894601899436913	1030	110	21	21128	A2M,FGB,FGG,FGA,PLG,LTF,HRG,SERPINF2,S100A12,GP1BA,S100A8,PTPN6,CPB2,MMP8,S100A9,PTPRC,PTK2,CD36,COLEC11,IL6ST,ASH1L
GO:BP,	biological regulation	GO:0065007	0.0001365264990780531	3.8647830461584536	12926	110	93	21128	A2M,FGB,VWF,FGG,FGA,C4A,PLG,LCP1,VCP,IGHM,IGHG2,C4BPA,HBB,LTF,HRG,SERPINF2,IGHG4,ITGB3,SELP,ITGA2B,ARHGDIB,PDLIM1,CA2,HBD,RSU1,F13B,S100A12,LCN2,FGL1,AZGP1,GP5,GP1BA,PPBP,LIMS1,CORO1A,CFHR1,IGLC2,MASP1,S100A8,RBP4,PTPN6,LSP1,CPB2,MANF,MMP8,UNC13D,CDA,PECAM1,CFHR2,PF4,ITGA6,H1-4,GRB2,PTPA,IQGAP2,APOM,SKAP2,S100A9,ITGB2,PF4V1,STX7,WBP2,RAB27B,RGS10,PTPRC,IGHV3-23,PTK2,S100A4,IGHV3-7,STOM,CD36,COLEC…
GO:BP,	regulation of cellular process	GO:0050794	0.00015808618914504245	3.801106069600308	11139	110	85	21128	FGB,VWF,FGG,FGA,C4A,PLG,LCP1,VCP,IGHM,IGHG2,C4BPA,HBB,LTF,HRG,SERPINF2,IGHG4,ITGB3,SELP,ITGA2B,ARHGDIB,PDLIM1,CA2,HBD,RSU1,S100A12,FGL1,AZGP1,GP5,GP1BA,PPBP,LIMS1,CORO1A,IGLC2,S100A8,RBP4,PTPN6,LSP1,CPB2,MANF,MMP8,UNC13D,CDA,PECAM1,PF4,ITGA6,H1-4,GRB2,PTPA,IQGAP2,APOM,SKAP2,S100A9,ITGB2,PF4V1,STX7,WBP2,RAB27B,RGS10,PTPRC,IGHV3-23,PTK2,S100A4,IGHV3-7,STOM,CD36,COLEC11,C4BPB,IGHV5-51,PITHD1,TGFB1I1…
GO:BP,	positive regulation of substrate adhesion-dependent cell spreading	GO:1900026	0.00019315121135970577	3.7141025638060565	44	110	6	21128	FGB,FGG,FGA,ITGB3,LIMS1,UNC13D
GO:BP,	regulation of vesicle-mediated transport	GO:0060627	0.00023801134970320102	3.6234023328764886	538	110	15	21128	FGB,FGG,FGA,C4A,ITGB3,CORO1A,UNC13D,ITGB2,RAB27B,PTPRC,CD36,COLEC11,RUFY1,TSG101,VPS4A
GO:BP,	regulation of humoral immune response	GO:0002920	0.00025414204913009285	3.5949234727129618	46	110	6	21128	A2M,C4BPA,MASP1,PTPN6,PTPRC,C4BPB
GO:BP,	inflammatory response	GO:0006954	0.0002603728665814658	3.5844042755106127	793	110	18	21128	A2M,C4A,SERPINF2,SELP,S100A12,PPBP,S100A8,MMP8,UNC13D,PF4,S100A9,ITGB2,PF4V1,LYZ,PTPRC,CD36,IL6ST,ASH1L
GO:BP,	positive regulation of lymphocyte activation	GO:0051251	0.00028305193457782543	3.548133872492501	397	110	13	21128	IGHM,IGHG2,IGHG4,CORO1A,IGLC2,PTPN6,PTPRC,IGHV3-23,IGHV3-7,IGHV5-51,IL6ST,IGHV2-26,IGHV2-70D
GO:BP,	granulocyte migration	GO:0097530	0.00029256136738326535	3.533783022844954	160	110	9	21128	S100A12,PPBP,S100A8,PECAM1,PF4,S100A9,ITGB2,PF4V1,PTK2
GO:BP,	biological process involved in interaction with symbiont	GO:0051702	0.00030806196616813144	3.5113619170771737	116	110	8	21128	PLG,LTF,HRG,CFHR1,CFHR2,PF4,STOM,PIK3C3
GO:BP,	regulation of cell-cell adhesion	GO:0022407	0.0003391044385986674	3.4696665256265353	476	110	14	21128	FGB,FGG,FGA,PLG,SERPINF2,SELP,FGL1,GP1BA,CORO1A,PTPN6,ITGB2,PTPRC,PTK2,IL6ST
GO:BP,	leukocyte activation	GO:0045321	0.0003677021284426372	3.4345038562115917	999	110	20	21128	LCP1,IGHM,IGHG2,IGHG4,S100A12,FGL1,CORO1A,IGLC2,PTPN6,MMP8,UNC13D,SKAP2,ITGB2,PTPRC,IGHV3-23,IGHV3-7,IGHV5-51,IL6ST,IGHV2-26,IGHV2-70D
GO:BP,	antimicrobial humoral immune response mediated by antimicrobial peptide	GO:0061844	0.00047471942519765656	3.32356299688171	83	110	7	21128	LTF,HRG,S100A12,PPBP,PF4,S100A9,PF4V1
GO:BP,	plasminogen activation	GO:0031639	0.00047627710076104414	3.322140298715558	27	110	5	21128	FGB,FGG,FGA,SERPINF2,CPB2
GO:BP,	B cell activation	GO:0042113	0.0005219758669867533	3.282349575688861	349	110	12	21128	IGHM,IGHG2,IGHG4,IGLC2,PTPN6,SKAP2,PTPRC,IGHV3-23,IGHV3-7,IGHV5-51,IGHV2-26,IGHV2-70D
GO:BP,	regulation of platelet activation	GO:0010543	0.0005385584703330405	3.2687671392286	52	110	6	21128	FGG,HRG,SELP,GP5,GP1BA,IL6ST
GO:BP,	positive regulation of blood coagulation	GO:0030194	0.0005774179752648087	3.238509700474687	28	110	5	21128	PLG,HRG,SERPINF2,CPB2,CD36
GO:BP,	positive regulation of hemostasis	GO:1900048	0.0005774179752648087	3.238509700474687	28	110	5	21128	PLG,HRG,SERPINF2,CPB2,CD36
GO:BP,	lymphocyte activation	GO:0046649	0.0005871330069973752	3.2312635040987687	838	110	18	21128	LCP1,IGHM,IGHG2,IGHG4,FGL1,CORO1A,IGLC2,PTPN6,UNC13D,SKAP2,ITGB2,PTPRC,IGHV3-23,IGHV3-7,IGHV5-51,IL6ST,IGHV2-26,IGHV2-70D
GO:BP,	complement activation, lectin pathway	GO:0001867	0.0006173888254297452	3.2094412353950936	12	110	4	21128	A2M,MASP1,COLEC11,MASP2
GO:BP,	response to organic substance	GO:0010033	0.0006607802142964677	3.1799429695474055	2664	110	34	21128	A2M,FGB,FGG,VCP,LTF,ITGB3,SELP,CA2,PPBP,LIMS1,CORO1A,S100A8,RBP4,PTPN6,LSP1,CPB2,MANF,CDA,CANX,PF4,GRB2,CPN1,S100A9,ITGB2,PF4V1,WBP2,RGS10,PTPRC,PTK2,CD36,GPX3,IL6ST,RWDD1,PIK3C3
GO:BP,	granulocyte chemotaxis	GO:0071621	0.0007864628559237934	3.104321783973008	131	110	8	21128	S100A12,PPBP,S100A8,PF4,S100A9,ITGB2,PF4V1,PTK2
GO:BP,	neutrophil migration	GO:1990266	0.0007864628559237934	3.104321783973008	131	110	8	21128	S100A12,PPBP,S100A8,PECAM1,PF4,S100A9,ITGB2,PF4V1
GO:BP,	cell adhesion mediated by integrin	GO:0033627	0.0008291212829694121	3.0813819366732047	90	110	7	21128	HRG,ITGB3,ITGA2B,PTPN6,ITGA6,ITGB2,PTK2
GO:BP,	positive regulation of coagulation	GO:0050820	0.0008303468580936078	3.0807404533000726	30	110	5	21128	PLG,HRG,SERPINF2,CPB2,CD36
GO:BP,	negative regulation of fibrinolysis	GO:0051918	0.0008882075883447902	3.0514855207793308	13	110	4	21128	PLG,HRG,SERPINF2,CPB2
GO:BP,	regulation of immune effector process	GO:0002697	0.0010888109504866713	2.9630475199575317	374	110	12	21128	A2M,C4BPA,MASP1,RBP4,PTPN6,UNC13D,ITGB2,STX7,PTPRC,CD36,COLEC11,C4BPB
GO:BP,	positive regulation of secretion	GO:0051047	0.0011969754606539489	2.9219147530286955	309	110	11	21128	FGB,FGG,FGA,S100A8,RBP4,CPB2,UNC13D,ITGB2,RAB27B,TSG101,VPS4A
GO:BP,	heterotypic cell-cell adhesion	GO:0034113	0.001280420382021296	2.8926474212750732	60	110	6	21128	FGB,FGG,FGA,ITGB3,ITGB2,PTPRC
GO:BP,	positive regulation of wound healing	GO:0090303	0.001280420382021296	2.8926474212750732	60	110	6	21128	PLG,HRG,SERPINF2,CPB2,PTK2,CD36
GO:BP,	cell chemotaxis	GO:0060326	0.0014461314710035277	2.8397922225768473	315	110	11	21128	HRG,BIN2,S100A12,PPBP,CORO1A,S100A8,PF4,S100A9,ITGB2,PF4V1,PTK2
GO:BP,	positive regulation of cell-cell adhesion	GO:0022409	0.0015387942835812223	2.812819435709219	317	110	11	21128	FGB,FGG,FGA,SERPINF2,SELP,GP1BA,CORO1A,PTPN6,ITGB2,PTPRC,IL6ST
GO:BP,	negative regulation of complement activation	GO:0045916	0.0016820988540690977	2.7741484850451315	15	110	4	21128	A2M,C4BPA,MASP1,C4BPB
GO:BP,	biological process involved in symbiotic interaction	GO:0044403	0.0016876106158237529	2.7727277513754993	320	110	11	21128	PLG,LTF,HRG,ITGB3,CFHR1,CFHR2,PF4,STOM,TSG101,PIK3C3,VPS4A
GO:BP,	negative regulation of response to external stimulus	GO:0032102	0.0021487839024203217	2.6678072581732253	399	110	12	21128	A2M,FGB,FGG,FGA,PLG,LTF,HRG,SERPINF2,GP1BA,CPB2,PTPRC,ASH1L
GO:BP,	neutrophil chemotaxis	GO:0030593	0.002526025597320007	2.597562252862832	106	110	7	21128	S100A12,PPBP,S100A8,PF4,S100A9,ITGB2,PF4V1
GO:BP,	regulation of lymphocyte activation	GO:0051249	0.0027389114547203123	2.5624220076686215	567	110	14	21128	IGHM,IGHG2,IGHG4,FGL1,CORO1A,IGLC2,PTPN6,PTPRC,IGHV3-23,IGHV3-7,IGHV5-51,IL6ST,IGHV2-26,IGHV2-70D
GO:BP,	substrate adhesion-dependent cell spreading	GO:0034446	0.003446172915476578	2.462662935142992	111	110	7	21128	FGB,FGG,FGA,ITGB3,LIMS1,UNC13D,PTK2
GO:BP,	regulation of fibrinolysis	GO:0051917	0.0037256979307615646	2.4287923594025784	18	110	4	21128	PLG,HRG,SERPINF2,CPB2
GO:BP,	positive regulation of response to wounding	GO:1903036	0.003798754579703501	2.4203587633348342	72	110	6	21128	PLG,HRG,SERPINF2,CPB2,PTK2,CD36
GO:BP,	positive regulation of secretion by cell	GO:1903532	0.00410719565358897	2.3864546082614817	282	110	10	21128	FGB,FGG,FGA,RBP4,CPB2,UNC13D,ITGB2,RAB27B,TSG101,VPS4A
GO:BP,	regulation of localization	GO:0032879	0.004318998397749176	2.364616957065912	2101	110	28	21128	FGB,FGG,FGA,C4A,LCP1,VCP,ITGB3,CA2,GP5,GP1BA,CORO1A,S100A8,RBP4,PTPN6,CPB2,UNC13D,PECAM1,ITGB2,STX7,RAB27B,PTPRC,STOM,CD36,COLEC11,RUFY1,TSG101,PIK3C3,VPS4A
GO:BP,	regulation of humoral immune response mediated by circulating immunoglobulin	GO:0002923	0.004700306987433281	2.327873776405903	19	110	4	21128	C4BPA,PTPN6,PTPRC,C4BPB
GO:BP,	maintenance of location in cell	GO:0051651	0.005666483173638061	2.2466863965119845	228	110	9	21128	ITGB3,LCN2,GP5,GP1BA,CORO1A,S100A8,PTPN6,S100A9,PTPRC
GO:BP,	response to chemical	GO:0042221	0.006151185373928421	2.2110411847530203	4088	110	42	21128	A2M,FGB,FGG,FGA,VCP,HBB,LTF,HRG,ITGB3,SELP,BIN2,CA2,HBD,S100A12,AZGP1,PPBP,LIMS1,CORO1A,S100A8,RBP4,PTPN6,LSP1,CPB2,MANF,CDA,CANX,PF4,GRB2,CPN1,APOM,S100A9,ITGB2,PF4V1,WBP2,RGS10,PTPRC,PTK2,CD36,GPX3,IL6ST,RWDD1,PIK3C3
GO:BP,	positive regulation of intracellular signal transduction	GO:1902533	0.006820107364959297	2.1662087884458154	995	110	18	21128	FGB,VWF,FGG,FGA,LTF,SERPINF2,ITGB3,SELP,S100A12,LIMS1,S100A8,PTPN6,MMP8,S100A9,PTPRC,PTK2,S100A4,CD36
GO:BP,	proteolysis	GO:0006508	0.007382369143756212	2.1318042423849994	1787	110	25	21128	A2M,FGB,FGG,FGA,C4A,PLG,VCP,LTF,HRG,SERPINF2,MASP1,S100A8,CPB2,MMP8,CANX,CPN1,S100A9,PTK2,COLEC11,PITHD1,TGFB1I1,TSG101,MASP2,PIK3C3,VPS4A
GO:BP,	regulation of response to stress	GO:0080134	0.007944595395804511	2.0999282157434322	1441	110	22	21128	A2M,FGB,FGG,FGA,PLG,LTF,HRG,SERPINF2,S100A12,GP1BA,S100A8,PTPN6,CPB2,MANF,MMP8,S100A9,PTPRC,PTK2,CD36,COLEC11,IL6ST,ASH1L
GO:BP,	positive regulation of transport	GO:0051050	0.007985413554064992	2.097702587403071	905	110	17	21128	FGB,FGG,FGA,C4A,CA2,S100A8,RBP4,CPB2,UNC13D,ITGB2,RAB27B,PTPRC,STOM,CD36,COLEC11,TSG101,VPS4A
GO:BP,	regulation of hydrolase activity	GO:0051336	0.008055482388252967	2.093908447512479	1007	110	18	21128	A2M,C4A,VCP,LTF,HRG,SERPINF2,RSU1,LIMS1,S100A8,ITGA6,PTPA,IQGAP2,S100A9,RGS10,PTPRC,PTK2,RP2,ASAP1
GO:BP,	cellular response to chemical stimulus	GO:0070887	0.008152907362736227	2.088687492311201	2697	110	32	21128	FGB,FGG,VCP,HBB,LTF,HRG,ITGB3,BIN2,CA2,HBD,S100A12,PPBP,LIMS1,CORO1A,S100A8,PTPN6,LSP1,CPB2,PF4,GRB2,APOM,S100A9,ITGB2,PF4V1,WBP2,RGS10,PTPRC,PTK2,CD36,GPX3,IL6ST,RWDD1
GO:BP,	regulation of complement activation	GO:0030449	0.008764494767438524	2.0572731139156137	22	110	4	21128	A2M,C4BPA,MASP1,C4BPB
GO:BP,	leukocyte chemotaxis	GO:0030595	0.008902615334217604	2.0504823912914705	241	110	9	21128	S100A12,PPBP,CORO1A,S100A8,PF4,S100A9,ITGB2,PF4V1,PTK2
GO:BP,	myeloid leukocyte migration	GO:0097529	0.00920674038013633	2.0358941032983795	242	110	9	21128	S100A12,PPBP,S100A8,PECAM1,PF4,S100A9,ITGB2,PF4V1,PTK2
GO:BP,	multicellular organismal process	GO:0032501	0.010117899285413765	1.9949096479168509	7657	110	63	21128	A2M,FGB,VWF,FGG,FGA,PLG,LCP1,IGHM,IGHG2,HBB,LTF,HRG,SERPINF2,IGHG4,ITGB3,SELP,ITGA2B,ARHGDIB,PDLIM1,F13B,S100A12,LCN2,FGL1,AZGP1,GP5,GP1BA,CORO1A,IGLC2,S100A8,RBP4,PTPN6,CPB2,MANF,MMP8,UNC13D,PECAM1,PF4,ITGA6,GRB2,APOM,SKAP2,S100A9,ITGB2,PF4V1,LYZ,PTPRC,IGHV3-23,PTK2,IGHV3-7,CD36,C4BPB,IGHV5-51,PITHD1,TGFB1I1,RP2,IL6ST,ITSN2,IGHV2-26,IGHV2-70D,ASAP1,VPS4A,CKMT2,ASH1L
GO:BP,	cell killing	GO:0001906	0.010951037224448217	1.9605447447945437	186	110	8	21128	LTF,S100A12,CORO1A,PTPN6,UNC13D,LYZ,STX7,PTPRC
GO:BP,	positive regulation of signaling	GO:0023056	0.013487301146842219	1.8700749453834182	1727	110	24	21128	FGB,VWF,FGG,FGA,VCP,LTF,SERPINF2,ITGB3,SELP,CA2,S100A12,LIMS1,S100A8,RBP4,PTPN6,MMP8,S100A9,WBP2,PTPRC,PTK2,S100A4,CD36,TGFB1I1,IL6ST
GO:BP,	positive regulation of cell communication	GO:0010647	0.013754329246734854	1.8615605838671465	1729	110	24	21128	FGB,VWF,FGG,FGA,VCP,LTF,SERPINF2,ITGB3,SELP,CA2,S100A12,LIMS1,S100A8,RBP4,PTPN6,MMP8,S100A9,WBP2,PTPRC,PTK2,S100A4,CD36,TGFB1I1,IL6ST
GO:BP,	positive regulation of response to external stimulus	GO:0032103	0.013769692077997988	1.8610757714585129	563	110	13	21128	PLG,LTF,HRG,SERPINF2,S100A12,S100A8,CPB2,MMP8,S100A9,PTK2,CD36,COLEC11,IL6ST
GO:BP,	negative regulation of response to stimulus	GO:0048585	0.01404134899272929	1.852591166283498	1611	110	23	21128	A2M,FGB,FGG,FGA,PLG,VCP,C4BPA,LTF,HRG,SERPINF2,GP1BA,MASP1,PTPN6,CPB2,PF4,ITGA6,RGS10,PTPRC,C4BPB,TGFB1I1,IL6ST,TSG101,ASH1L
GO:BP,	leukocyte cell-cell adhesion	GO:0007159	0.015449033380793134	1.811098688441112	403	110	11	21128	SELP,FGL1,GP1BA,CORO1A,S100A8,PTPN6,PECAM1,S100A9,ITGB2,PTPRC,IL6ST
GO:BP,	regulation of peptidyl-tyrosine phosphorylation	GO:0050730	0.016422018736411432	1.7845734567053526	260	110	9	21128	HRG,ITGB3,PTPN6,PECAM1,ITGB2,PTPRC,CD36,IL6ST,TSG101
GO:BP,	cellular oxidant detoxification	GO:0098869	0.019179790303639657	1.717156145365043	95	110	6	21128	HBB,HBD,APOM,S100A9,CD36,GPX3
GO:BP,	positive regulation of signal transduction	GO:0009967	0.020187800294560982	1.694911000124163	1528	110	22	21128	FGB,VWF,FGG,FGA,VCP,LTF,SERPINF2,ITGB3,SELP,S100A12,LIMS1,S100A8,PTPN6,MMP8,S100A9,WBP2,PTPRC,PTK2,S100A4,CD36,TGFB1I1,IL6ST
GO:BP,	protein maturation	GO:0051604	0.0207998047986377	1.6819407407714837	339	110	10	21128	FGB,FGG,FGA,SERPINF2,F13B,GP5,GP1BA,CPB2,CPN1,PIK3C3
GO:BP,	cytolysis by host of symbiont cells	GO:0051838	0.020878662447873054	1.6802973270354102	9	110	3	21128	HRG,CFHR1,CFHR2
GO:BP,	maintenance of location	GO:0051235	0.021337773175632405	1.6708509058111147	340	110	10	21128	ITGB3,LCN2,GP5,GP1BA,CORO1A,S100A8,PTPN6,S100A9,PTPRC,CD36
GO:BP,	response to oxygen-containing compound	GO:1901700	0.02401457192674324	1.6195251504995236	1665	110	23	21128	A2M,VCP,HBB,LTF,ITGB3,SELP,CA2,PPBP,S100A8,RBP4,CPB2,CDA,PF4,GRB2,S100A9,PF4V1,WBP2,RGS10,PTK2,CD36,GPX3,RWDD1,PIK3C3
GO:BP,	defense response to fungus	GO:0050832	0.025872336249183066	1.5871643531034207	59	110	5	21128	LTF,HRG,S100A12,S100A8,S100A9
GO:BP,	positive regulation of platelet activation	GO:0010572	0.029713502183904034	1.5270461570315612	10	110	3	21128	SELP,GP5,GP1BA
GO:BP,	regulation of exocytosis	GO:0017157	0.03146936639181922	1.5021120011384723	215	110	8	21128	FGB,FGG,FGA,UNC13D,ITGB2,RAB27B,TSG101,VPS4A
GO:BP,	killing by host of symbiont cells	GO:0051873	0.03179846213288193	1.4975938832656779	30	110	4	21128	HRG,CFHR1,CFHR2,PF4
GO:BP,	chemotaxis	GO:0006935	0.03885200411640904	1.410586573922303	621	110	13	21128	HRG,ITGB3,BIN2,S100A12,PPBP,CORO1A,S100A8,LSP1,PF4,S100A9,ITGB2,PF4V1,PTK2
GO:BP,	taxis	GO:0042330	0.04017833081940358	1.3960081096728911	623	110	13	21128	HRG,ITGB3,BIN2,S100A12,PPBP,CORO1A,S100A8,LSP1,PF4,S100A9,ITGB2,PF4V1,PTK2
GO:BP,	regulation of opsonization	GO:1903027	0.04070109675333226	1.390393887887737	11	110	3	21128	C4BPA,COLEC11,C4BPB
GO:BP,	megakaryocyte differentiation	GO:0030219	0.04164078958468259	1.3804810440745776	65	110	5	21128	GP5,GP1BA,PTPN6,PF4,PITHD1
GO:BP,	cellular detoxification	GO:1990748	0.044375525848258025	1.352856487533612	110	110	6	21128	HBB,HBD,APOM,S100A9,CD36,GPX3
GO:BP,	zymogen activation	GO:0031638	0.04486825472184689	1.3480608232552629	66	110	5	21128	FGB,FGG,FGA,SERPINF2,CPB2
GO:BP,	neutrophil aggregation	GO:0070488	0.04974268258819893	1.3032707972358308	2	110	2	21128	S100A8,S100A9
GO:BP,	cell migration	GO:0016477	0.051361430984023716	1.2893628848650651	1502	110	21	21128	PLG,LCP1,HRG,ITGB3,SELP,BIN2,ARHGDIB,PDLIM1,S100A12,GP1BA,PPBP,CORO1A,S100A8,PECAM1,PF4,ITGA6,S100A9,ITGB2,PF4V1,PTPRC,PTK2
GO:BP,	negative regulation of humoral immune response mediated by circulating immunoglobulin	GO:0002924	0.05406233272929977	1.2671052189109622	12	110	3	21128	C4BPA,PTPN6,C4BPB
GO:BP,	peptidyl-tyrosine phosphorylation	GO:0018108	0.05415616984241305	1.2663520584131156	379	110	10	21128	HRG,ITGB3,PTPN6,PECAM1,ITGB2,PTPRC,PTK2,CD36,IL6ST,TSG101
GO:BP,	regulation of transport	GO:0051049	0.0551169072384862	1.2587151598766106	1754	110	23	21128	FGB,FGG,FGA,C4A,LCP1,ITGB3,CA2,CORO1A,S100A8,RBP4,PTPN6,CPB2,UNC13D,ITGB2,RAB27B,PTPRC,STOM,CD36,COLEC11,RUFY1,TSG101,PIK3C3,VPS4A
GO:BP,	peptidyl-tyrosine modification	GO:0018212	0.05662799101346737	1.2469688455294274	381	110	10	21128	HRG,ITGB3,PTPN6,PECAM1,ITGB2,PTPRC,PTK2,CD36,IL6ST,TSG101
GO:BP,	regulation of cell death	GO:0010941	0.059148758979678306	1.2280543630213718	1638	110	22	21128	FGB,FGG,FGA,VCP,HBB,LTF,HRG,ITGB3,HBD,CORO1A,S100A8,PTPN6,PF4,ITGA6,PTPA,S100A9,ITGB2,PTPRC,PTK2,CD36,IL6ST,VPS4A
GO:BP,	response to fungus	GO:0009620	0.05976824253289912	1.223529514276501	70	110	5	21128	LTF,HRG,S100A12,S100A8,S100A9
GO:BP,	integrin-mediated signaling pathway	GO:0007229	0.0660109801949169	1.1803838183757738	118	110	6	21128	ITGB3,ITGA2B,LIMS1,ITGA6,ITGB2,PTK2
GO:BP,	regulation of protein localization	GO:0032880	0.06740632739209326	1.1712993345849678	854	110	15	21128	FGB,FGG,FGA,LCP1,VCP,ITGB3,RBP4,PECAM1,ITGB2,STX7,STOM,CD36,TSG101,PIK3C3,VPS4A
GO:BP,	regulation of signal transduction	GO:0009966	0.06910215488895835	1.160508409329251	2991	110	32	21128	FGB,VWF,FGG,FGA,VCP,LTF,HRG,SERPINF2,ITGB3,SELP,ARHGDIB,S100A12,LIMS1,S100A8,PTPN6,MMP8,PF4,ITGA6,GRB2,S100A9,WBP2,RGS10,PTPRC,PTK2,S100A4,CD36,TGFB1I1,IL6ST,TSG101,GRAP2,RWDD1,ASH1L
GO:BP,	cellular response to toxic substance	GO:0097237	0.06922430647801196	1.159741386529029	119	110	6	21128	HBB,HBD,APOM,S100A9,CD36,GPX3
GO:BP,	negative regulation of immune effector process	GO:0002698	0.07602749492076438	1.1190293191280332	121	110	6	21128	A2M,C4BPA,MASP1,PTPN6,PTPRC,C4BPB
GO:BP,	regulation of MAPK cascade	GO:0043408	0.08914294251936047	1.0499130343868237	673	110	13	21128	FGB,FGG,FGA,SERPINF2,ITGB3,S100A12,PTPN6,MMP8,GRB2,PTPRC,CD36,GRAP2,ASH1L
GO:BP,	release of sequestered calcium ion into cytosol	GO:0051209	0.09540167551653672	1.020443997820053	126	110	6	21128	ITGB3,GP5,GP1BA,CORO1A,PTPN6,PTPRC
GO:BP,	negative regulation of sequestering of calcium ion	GO:0051283	0.09971238652014626	1.0012508891987293	127	110	6	21128	ITGB3,GP5,GP1BA,CORO1A,PTPN6,PTPRC
GO:BP,	bone cell development	GO:0098751	0.1018768825009039	0.9919243531996854	40	110	4	21128	LTF,GP5,GP1BA,PTPN6
GO:BP,	cell motility	GO:0048870	0.10263925712194595	0.9886864999399005	1699	110	22	21128	PLG,LCP1,HRG,ITGB3,SELP,BIN2,ARHGDIB,PDLIM1,S100A12,GP1BA,PPBP,CORO1A,S100A8,PECAM1,PF4,ITGA6,S100A9,ITGB2,PF4V1,PTPRC,PTK2,ASH1L
GO:BP,	negative regulation of multicellular organismal process	GO:0051241	0.10374684721410742	0.9840250922864295	1105	110	17	21128	FGB,FGG,FGA,PLG,LTF,HRG,SERPINF2,ARHGDIB,FGL1,GP1BA,RBP4,PTPN6,CPB2,MMP8,PF4,APOM,PTPRC
GO:BP,	positive regulation of immune effector process	GO:0002699	0.10600319325269833	0.9746810517999679	255	110	8	21128	RBP4,PTPN6,UNC13D,ITGB2,STX7,PTPRC,CD36,COLEC11
GO:BP,	regulation of molecular function	GO:0065009	0.10786614325419111	0.9671148491561404	3059	110	32	21128	A2M,C4A,VCP,LTF,HRG,SERPINF2,ITGB3,ARHGDIB,RSU1,S100A12,LIMS1,CFHR1,S100A8,PTPN6,MMP8,CFHR2,ITGA6,PTPA,IQGAP2,S100A9,ITGB2,RGS10,PTPRC,PTK2,STOM,CD36,RP2,PPP1R14A,ITSN2,TSG101,ASAP1,RWDD1
GO:BP,	regulation of sequestering of calcium ion	GO:0051282	0.10880119957748458	0.9633663163381128	129	110	6	21128	ITGB3,GP5,GP1BA,CORO1A,PTPN6,PTPRC
GO:BP,	positive regulation of heterotypic cell-cell adhesion	GO:0034116	0.11054407415996013	0.9564645333078635	15	110	3	21128	FGB,FGG,FGA
GO:BP,	carbon dioxide transport	GO:0015670	0.11054407415996013	0.9564645333078635	15	110	3	21128	HBB,CA2,HBD
GO:BP,	positive regulation of nitric oxide biosynthetic process	GO:0045429	0.11243956002433274	0.9490808624543008	41	110	4	21128	HBB,MMP8,ITGB2,CD36
GO:BP,	locomotion	GO:0040011	0.12389570026698328	0.9069437653166333	1353	110	19	21128	HRG,ITGB3,SELP,BIN2,ARHGDIB,S100A12,GP1BA,PPBP,CORO1A,S100A8,LSP1,PECAM1,PF4,ITGA6,S100A9,ITGB2,PF4V1,PTPRC,PTK2
GO:BP,	regulation of signaling	GO:0023051	0.12745942493384416	0.8946280452835937	3378	110	34	21128	FGB,VWF,FGG,FGA,VCP,LTF,HRG,SERPINF2,ITGB3,SELP,ARHGDIB,CA2,S100A12,LIMS1,S100A8,RBP4,PTPN6,MMP8,PF4,ITGA6,GRB2,S100A9,WBP2,RGS10,PTPRC,PTK2,S100A4,CD36,TGFB1I1,IL6ST,TSG101,GRAP2,RWDD1,ASH1L
GO:BP,	regulation of intracellular signal transduction	GO:1902531	0.12865609831672375	0.890569623347671	1725	110	22	21128	FGB,VWF,FGG,FGA,LTF,SERPINF2,ITGB3,SELP,ARHGDIB,S100A12,LIMS1,S100A8,PTPN6,MMP8,GRB2,S100A9,PTPRC,PTK2,S100A4,CD36,GRAP2,ASH1L
GO:BP,	sequestering of calcium ion	GO:0051208	0.12896411755670398	0.8895311091958713	133	110	6	21128	ITGB3,GP5,GP1BA,CORO1A,PTPN6,PTPRC
GO:BP,	regulation of cell communication	GO:0010646	0.13539014795404528	0.8684129371639118	3388	110	34	21128	FGB,VWF,FGG,FGA,VCP,LTF,HRG,SERPINF2,ITGB3,SELP,ARHGDIB,CA2,S100A12,LIMS1,S100A8,RBP4,PTPN6,MMP8,PF4,ITGA6,GRB2,S100A9,WBP2,RGS10,PTPRC,PTK2,S100A4,CD36,TGFB1I1,IL6ST,TSG101,GRAP2,RWDD1,ASH1L
GO:BP,	positive regulation of nitric oxide metabolic process	GO:1904407	0.13592899470600772	0.8666878950135184	43	110	4	21128	HBB,MMP8,ITGB2,CD36
GO:BP,	detoxification	GO:0098754	0.14010669765172612	0.8535411032319962	135	110	6	21128	HBB,HBD,APOM,S100A9,CD36,GPX3
GO:BP,	positive regulation of viral budding via host ESCRT complex	GO:1903774	0.14871946026866553	0.8276321993709455	3	110	2	21128	TSG101,VPS4A
GO:BP,	negative regulation of B cell mediated immunity	GO:0002713	0.16395932087733592	0.7852638892079167	17	110	3	21128	C4BPA,PTPN6,C4BPB
GO:BP,	opsonization	GO:0008228	0.16395932087733592	0.7852638892079167	17	110	3	21128	C4BPA,COLEC11,C4BPB
GO:BP,	negative regulation of immunoglobulin mediated immune response	GO:0002890	0.16395932087733592	0.7852638892079167	17	110	3	21128	C4BPA,PTPN6,C4BPB
GO:BP,	regulation of secretion	GO:0051046	0.17393783884488243	0.7596059302805203	620	110	12	21128	FGB,FGG,FGA,S100A8,RBP4,CPB2,UNC13D,ITGB2,RAB27B,TSG101,PIK3C3,VPS4A
GO:BP,	multivesicular body sorting pathway	GO:0071985	0.1933397201290329	0.7136789144102695	47	110	4	21128	VCP,RAB27B,TSG101,VPS4A
GO:BP,	chronic inflammatory response	GO:0002544	0.1960060454666506	0.7077305333766016	18	110	3	21128	S100A8,UNC13D,S100A9
GO:BP,	secretion	GO:0046903	0.21037359536785616	0.6770087707239067	945	110	15	21128	FGB,FGG,FGA,CA2,CORO1A,S100A8,RBP4,CPB2,UNC13D,CANX,ITGB2,RAB27B,TSG101,PIK3C3,VPS4A
GO:BP,	regulation of cell adhesion mediated by integrin	GO:0033628	0.2278344996694688	0.6423805125588302	49	110	4	21128	HRG,ITGB3,PTPN6,PTK2
GO:BP,	podosome assembly	GO:0071800	0.23187587143150418	0.6347444408805233	19	110	3	21128	LCP1,BIN2,ASAP1
GO:BP,	positive regulation of ERK1 and ERK2 cascade	GO:0070374	0.24175441368688322	0.6166255883003471	214	110	7	21128	FGB,FGG,FGA,SERPINF2,ITGB3,PTPRC,CD36
GO:BP,	exocytosis	GO:0006887	0.2552978118136849	0.5929529075667432	370	110	9	21128	FGB,FGG,FGA,CORO1A,UNC13D,ITGB2,RAB27B,TSG101,VPS4A
GO:BP,	regulation of cellular localization	GO:0060341	0.2588576444208037	0.5869390051818321	963	110	15	21128	FGB,FGG,FGA,LCP1,VCP,ITGB3,RBP4,PECAM1,ITGB2,STX7,STOM,CD36,TSG101,PIK3C3,VPS4A
GO:BP,	regulation of extrinsic apoptotic signaling pathway	GO:2001236	0.27900433364291327	0.554389050982363	153	110	6	21128	FGB,FGG,FGA,PF4,ITGA6,PTPRC
GO:BP,	regulation of catalytic activity	GO:0050790	0.280499199494479	0.5520683738218183	2356	110	26	21128	A2M,C4A,VCP,LTF,HRG,SERPINF2,ITGB3,ARHGDIB,RSU1,S100A12,LIMS1,S100A8,PTPN6,ITGA6,PTPA,IQGAP2,S100A9,ITGB2,RGS10,PTPRC,PTK2,RP2,PPP1R14A,ITSN2,TSG101,ASAP1
GO:BP,	cell-substrate junction assembly	GO:0007044	0.2847178870805399	0.5455852479343424	97	110	5	21128	HRG,ITGB3,LIMS1,ITGA6,PTK2
GO:BP,	regulation of viral budding via host ESCRT complex	GO:1903772	0.29642560960667935	0.5280842783229223	4	110	2	21128	TSG101,VPS4A
GO:BP,	negative regulation of extrinsic apoptotic signaling pathway	GO:2001237	0.29879207293667687	0.5246309286957496	98	110	5	21128	FGB,FGG,FGA,PF4,ITGA6
GO:BP,	positive regulation of peptide secretion	GO:0002793	0.29879207293667687	0.5246309286957496	98	110	5	21128	FGB,FGG,FGA,S100A8,RBP4
GO:BP,	leukocyte migration involved in inflammatory response	GO:0002523	0.31585624381914557	0.5005105335886766	21	110	3	21128	S100A8,S100A9,ITGB2
GO:BP,	regulation of secretion by cell	GO:1903530	0.3183273010121073	0.4971261129641174	563	110	11	21128	FGB,FGG,FGA,RBP4,CPB2,UNC13D,ITGB2,RAB27B,TSG101,PIK3C3,VPS4A
GO:BP,	positive regulation of NF-kappaB transcription factor activity	GO:0051092	0.32113146252820735	0.4933171427891283	157	110	6	21128	LTF,S100A12,S100A8,S100A9,ITGB2,CD36
GO:BP,	reactive oxygen species metabolic process	GO:0072593	0.3293031203628781	0.4824041540437588	225	110	7	21128	HBB,HBD,MMP8,GRB2,ITGB2,CD36,GPX3
GO:BP,	negative regulation of lymphocyte mediated immunity	GO:0002707	0.33334158781057055	0.4771105002310756	54	110	4	21128	C4BPA,PTPN6,PTPRC,C4BPB
GO:BP,	regulation of ERK1 and ERK2 cascade	GO:0070372	0.33375243162091234	0.4765755614754663	301	110	8	21128	FGB,FGG,FGA,SERPINF2,ITGB3,PTPN6,PTPRC,CD36
GO:BP,	cell death	GO:0008219	0.34676733647688657	0.4599618173547887	2113	110	24	21128	FGB,FGG,FGA,VCP,HBB,LTF,HRG,ITGB3,HBD,LCN2,CORO1A,S100A8,PTPN6,PF4,ITGA6,PTPA,S100A9,ITGB2,PTPRC,PTK2,CD36,COLEC11,IL6ST,VPS4A
GO:BP,	MAPK cascade	GO:0000165	0.35560904554122374	0.44902720051769673	773	110	13	21128	FGB,FGG,FGA,SERPINF2,ITGB3,S100A12,PTPN6,MMP8,GRB2,PTPRC,CD36,GRAP2,ASH1L
GO:BP,	cell-substrate junction organization	GO:0150115	0.3773122756159632	0.42329906507319026	103	110	5	21128	HRG,ITGB3,LIMS1,ITGA6,PTK2
GO:BP,	protein metabolic process	GO:0019538	0.377565742950614	0.42300741671090913	5482	110	46	21128	A2M,FGB,FGG,FGA,C4A,PLG,VCP,C4BPA,LTF,HRG,SERPINF2,ITGB3,F13B,S100A12,GP5,GP1BA,MASP1,S100A8,PTPN6,CPB2,MMP8,MLEC,PECAM1,CANX,H1-4,PTPA,CPN1,APOM,S100A9,ITGB2,WBP2,PTPRC,PTK2,CD36,COLEC11,C4BPB,PITHD1,TGFB1I1,IL6ST,GUSB,TSG101,MASP2,RWDD1,PIK3C3,VPS4A,ASH1L
GO:BP,	regulation of tumor necrosis factor production	GO:0032680	0.3806954663414573	0.419422295117894	162	110	6	21128	LTF,PTPN6,MMP8,PF4,PTPRC,CD36
GO:BP,	tumor necrosis factor production	GO:0032640	0.3806954663414573	0.419422295117894	162	110	6	21128	LTF,PTPN6,MMP8,PF4,PTPRC,CD36
GO:BP,	negative regulation of adaptive immune response based on somatic recombination of immune receptors built from immunoglobulin superfamily domains	GO:0002823	0.38405756551730214	0.41560367533873743	56	110	4	21128	C4BPA,PTPN6,PTPRC,C4BPB
GO:BP,	positive regulation of cell-matrix adhesion	GO:0001954	0.38405756551730214	0.41560367533873743	56	110	4	21128	HRG,ITGB3,LIMS1,CD36
GO:BP,	megakaryocyte development	GO:0035855	0.4174110029371995	0.3794361071346539	23	110	3	21128	GP5,GP1BA,PTPN6
GO:BP,	positive regulation of hydrolase activity	GO:0051345	0.42380690781704583	0.3728319688088592	582	110	11	21128	VCP,RSU1,LIMS1,S100A8,ITGA6,PTPA,S100A9,RGS10,PTPRC,RP2,ASAP1
GO:BP,	regulation of leukocyte mediated immunity	GO:0002703	0.429653195529444	0.366881953810656	235	110	7	21128	C4BPA,PTPN6,UNC13D,ITGB2,STX7,PTPRC,C4BPB
GO:BP,	regulation of nitric oxide biosynthetic process	GO:0045428	0.44010888518205105	0.3564398635511574	58	110	4	21128	HBB,MMP8,ITGB2,CD36
GO:BP,	tumor necrosis factor superfamily cytokine production	GO:0071706	0.4486550409163652	0.3480874483189688	167	110	6	21128	LTF,PTPN6,MMP8,PF4,PTPRC,CD36
GO:BP,	regulation of tumor necrosis factor superfamily cytokine production	GO:1903555	0.4486550409163652	0.3480874483189688	167	110	6	21128	LTF,PTPN6,MMP8,PF4,PTPRC,CD36
GO:BP,	gas transport	GO:0015669	0.4752368872229397	0.3230898573878949	24	110	3	21128	HBB,CA2,HBD
GO:BP,	regulation of heterotypic cell-cell adhesion	GO:0034114	0.4752368872229397	0.3230898573878949	24	110	3	21128	FGB,FGG,FGA
GO:BP,	positive regulation of leukocyte adhesion to vascular endothelial cell	GO:1904996	0.4752368872229397	0.3230898573878949	24	110	3	21128	SELP,GP1BA,ITGB2
GO:BP,	response to symbiotic bacterium	GO:0009609	0.492360245375643	0.3077170205477722	5	110	2	21128	C4BPA,C4BPB
GO:BP,	response to symbiont	GO:0009608	0.492360245375643	0.3077170205477722	5	110	2	21128	C4BPA,C4BPB
GO:BP,	autophagosome maturation	GO:0097352	0.5018156949845768	0.2994557596443649	60	110	4	21128	VCP,TSG101,PIK3C3,VPS4A
GO:BP,	regulation of protein transport	GO:0051223	0.5117112365570371	0.29097504634401083	498	110	10	21128	FGB,FGG,FGA,LCP1,RBP4,ITGB2,STOM,CD36,TSG101,PIK3C3
GO:BP,	response to lipid	GO:0033993	0.5153910553544847	0.287863122928883	913	110	14	21128	A2M,LTF,SELP,PPBP,S100A8,RBP4,PF4,CPN1,S100A9,PF4V1,WBP2,CD36,GPX3,RWDD1
GO:BP,	negative regulation of adaptive immune response	GO:0002820	0.534891088069902	0.2717346379141197	61	110	4	21128	C4BPA,PTPN6,PTPRC,C4BPB
GO:BP,	regulation of nitric oxide metabolic process	GO:0080164	0.534891088069902	0.2717346379141197	61	110	4	21128	HBB,MMP8,ITGB2,CD36
GO:BP,	cellular monoatomic cation homeostasis	GO:0030003	0.5366940622910656	0.27027320949867367	501	110	10	21128	ITGB3,CA2,LCN2,GP5,GP1BA,CORO1A,S100A8,PTPN6,S100A9,PTPRC
GO:BP,	one-carbon compound transport	GO:0019755	0.5379998322405658	0.2692178597555586	25	110	3	21128	HBB,CA2,HBD
GO:BP,	positive regulation of cellular component biogenesis	GO:0044089	0.5452455175146816	0.2634078960869805	502	110	10	21128	LCP1,VCP,HRG,SERPINF2,LIMS1,GRB2,CD36,TSG101,ASAP1,VPS4A
GO:BP,	ERK1 and ERK2 cascade	GO:0070371	0.5602860025886892	0.2515902272101529	325	110	8	21128	FGB,FGG,FGA,SERPINF2,ITGB3,PTPN6,PTPRC,CD36
GO:BP,	secretion by cell	GO:0032940	0.5723925015306071	0.24230606422954062	812	110	13	21128	FGB,FGG,FGA,CORO1A,RBP4,CPB2,UNC13D,CANX,ITGB2,RAB27B,TSG101,PIK3C3,VPS4A
GO:BP,	monoatomic cation homeostasis	GO:0055080	0.5816151259446403	0.23536430739511677	604	110	11	21128	LTF,ITGB3,CA2,LCN2,GP5,GP1BA,CORO1A,S100A8,PTPN6,S100A9,PTPRC
GO:BP,	response to lipopolysaccharide	GO:0032496	0.595813871797909	0.22488938971588196	328	110	8	21128	LTF,SELP,PPBP,S100A8,PF4,S100A9,PF4V1,CD36
GO:BP,	antibacterial humoral response	GO:0019731	0.6056902860996748	0.21774939138067706	63	110	4	21128	FGB,FGA,IGHM,LTF
GO:BP,	regulation of B cell mediated immunity	GO:0002712	0.6056902860996748	0.21774939138067706	63	110	4	21128	C4BPA,PTPN6,PTPRC,C4BPB
GO:BP,	regulation of immunoglobulin mediated immune response	GO:0002889	0.6056902860996748	0.21774939138067706	63	110	4	21128	C4BPA,PTPN6,PTPRC,C4BPB
GO:BP,	sequestering of metal ion	GO:0051238	0.6058745210644346	0.21761731057292755	26	110	3	21128	LCN2,S100A8,S100A9
GO:BP,	cellular monoatomic ion homeostasis	GO:0006873	0.6178589728256566	0.20911064192247478	510	110	10	21128	ITGB3,CA2,LCN2,GP5,GP1BA,CORO1A,S100A8,PTPN6,S100A9,PTPRC
GO:BP,	protein processing	GO:0016485	0.6251133934397359	0.20404119597056514	250	110	7	21128	FGB,FGG,FGA,SERPINF2,CPB2,CPN1,PIK3C3
GO:BP,	acute inflammatory response	GO:0002526	0.6552924560807423	0.18356483174073948	116	110	5	21128	A2M,SERPINF2,S100A8,IL6ST,ASH1L
GO:BP,	monoatomic ion homeostasis	GO:0050801	0.6682850977436077	0.1750382232095082	614	110	11	21128	LTF,ITGB3,CA2,LCN2,GP5,GP1BA,CORO1A,S100A8,PTPN6,S100A9,PTPRC
GO:BP,	regulation of defense response	GO:0031347	0.6720977707952369	0.1725675450588743	718	110	12	21128	A2M,LTF,S100A12,S100A8,PTPN6,MMP8,S100A9,PTPRC,CD36,COLEC11,IL6ST,ASH1L
GO:BP,	cellular metal ion homeostasis	GO:0006875	0.6865930796583785	0.1633005782498048	423	110	9	21128	ITGB3,LCN2,GP5,GP1BA,CORO1A,S100A8,PTPN6,S100A9,PTPRC
GO:BP,	calcium ion transmembrane import into cytosol	GO:0097553	0.7112582246671882	0.14797269858362364	182	110	6	21128	ITGB3,GP5,GP1BA,CORO1A,PTPN6,PTPRC
GO:BP,	negative regulation of leukocyte mediated immunity	GO:0002704	0.724129839330862	0.1401835561104709	66	110	4	21128	C4BPA,PTPN6,PTPRC,C4BPB
GO:BP,	induction of bacterial agglutination	GO:0043152	0.736026294864635	0.13310667002306667	6	110	2	21128	FGB,FGA
GO:BP,	positive regulation of catalytic activity	GO:0043085	0.741119620578908	0.13011168896457123	1181	110	16	21128	VCP,LTF,ITGB3,RSU1,S100A12,LIMS1,S100A8,ITGA6,PTPA,S100A9,ITGB2,RGS10,PTPRC,PTK2,RP2,ASAP1
GO:BP,	regulation of establishment of protein localization	GO:0070201	0.7530424791660866	0.12318052453359164	523	110	10	21128	FGB,FGG,FGA,LCP1,RBP4,ITGB2,STOM,CD36,TSG101,PIK3C3
GO:BP,	metal ion homeostasis	GO:0055065	0.7875119155456537	0.10374286634270896	526	110	10	21128	LTF,ITGB3,LCN2,GP5,GP1BA,CORO1A,S100A8,PTPN6,S100A9,PTPRC
GO:BP,	regulation of cell-matrix adhesion	GO:0001952	0.795669530671005	0.09926727247154837	121	110	5	21128	HRG,ITGB3,LIMS1,PTK2,CD36
GO:BP,	negative regulation of immune response	GO:0050777	0.7983378629245678	0.09781327287192251	186	110	6	21128	A2M,C4BPA,MASP1,PTPN6,PTPRC,C4BPB
GO:BP,	positive regulation of reactive oxygen species metabolic process	GO:2000379	0.8117365203254587	0.09058491452441582	68	110	4	21128	MMP8,GRB2,ITGB2,CD36
GO:BP,	negative regulation of extrinsic apoptotic signaling pathway via death domain receptors	GO:1902042	0.841870332348903	0.07475479482096827	29	110	3	21128	FGB,FGG,FGA
GO:BP,	hydrogen peroxide catabolic process	GO:0042744	0.841870332348903	0.07475479482096827	29	110	3	21128	HBB,HBD,GPX3
GO:BP,	anatomical structure homeostasis	GO:0060249	0.8471633697740134	0.0720328308148053	263	110	7	21128	LTF,ITGB3,AZGP1,CORO1A,RBP4,PECAM1,LYZ
GO:BP,	tissue homeostasis	GO:0001894	0.8471633697740134	0.0720328308148053	263	110	7	21128	LTF,ITGB3,AZGP1,CORO1A,RBP4,PECAM1,LYZ
GO:BP,	response to molecule of bacterial origin	GO:0002237	0.8660584658019628	0.06245278867769518	347	110	8	21128	LTF,SELP,PPBP,S100A8,PF4,S100A9,PF4V1,CD36
GO:BP,	positive regulation of molecular function	GO:0044093	0.9075437297238074	0.042132439437650875	1580	110	19	21128	VCP,LTF,ITGB3,RSU1,S100A12,LIMS1,S100A8,MMP8,ITGA6,PTPA,S100A9,ITGB2,RGS10,PTPRC,PTK2,CD36,RP2,ASAP1,RWDD1
GO:BP,	regulation of adaptive immune response	GO:0002819	0.9443285422511227	0.02487688360110814	192	110	6	21128	C4BPA,PTPN6,STX7,PTPRC,C4BPB,IL6ST
GO:BP,	regulation of peptide transport	GO:0090087	0.9443285422511227	0.02487688360110814	192	110	6	21128	FGB,FGG,FGA,CA2,S100A8,RBP4
GO:BP,	positive regulation of DNA-binding transcription factor activity	GO:0051091	0.9477104568839703	0.02332432741364831	268	110	7	21128	LTF,S100A12,S100A8,S100A9,ITGB2,CD36,RWDD1
GO:BP,	regulation of cytoskeleton organization	GO:0051493	0.9802220160817429	0.008675547328962955	541	110	10	21128	HRG,SERPINF2,ITGB3,ARHGDIB,CORO1A,S100A8,GRB2,IQGAP2,S100A9,PTK2
GO:BP,	positive regulation of leukocyte cell-cell adhesion	GO:1903039	0.9904994448859471	0.004145763520726968	270	110	7	21128	SELP,GP1BA,CORO1A,PTPN6,ITGB2,PTPRC,IL6ST
GO:BP,	labyrinthine layer development	GO:0060711	1	0	48	110	2	21128	PLG,GRB2
GO:BP,	regulation of protein tyrosine kinase activity	GO:0061097	1	0	95	110	3	21128	ITGB3,PTPRC,TSG101
GO:BP,	negative regulation of protein tyrosine kinase activity	GO:0061099	1	0	31	110	2	21128	PTPRC,TSG101
GO:BP,	negative regulation of response to cytokine stimulus	GO:0060761	1	0	79	110	2	21128	PTPRC,IL6ST
GO:BP,	regulation of Fc receptor mediated stimulatory signaling pathway	GO:0060368	1	0	11	110	1	21128	PTPRC
GO:BP,	cellular response to chemical stress	GO:0062197	1	0	332	110	2	21128	CD36,RWDD1
GO:BP,	regulation of response to cytokine stimulus	GO:0060759	1	0	163	110	3	21128	PTPN6,PTPRC,IL6ST
GO:BP,	labyrinthine layer blood vessel development	GO:0060716	1	0	20	110	1	21128	PLG
GO:BP,	response to growth hormone	GO:0060416	1	0	39	110	1	21128	PTK2
GO:BP,	membrane fission	GO:0090148	1	0	45	110	2	21128	TSG101,VPS4A
GO:BP,	positive regulation of small molecule metabolic process	GO:0062013	1	0	148	110	1	21128	VCP
GO:BP,	positive regulation of Fc receptor mediated stimulatory signaling pathway	GO:0060369	1	0	6	110	1	21128	PTPRC
GO:BP,	negative regulation of heart growth	GO:0061117	1	0	23	110	1	21128	RBP4
GO:BP,	regulation of canonical Wnt signaling pathway	GO:0060828	1	0	249	110	1	21128	VCP
GO:BP,	negative regulation of cellular response to growth factor stimulus	GO:0090288	1	0	104	110	1	21128	HRG
GO:BP,	regulation of proteasomal protein catabolic process	GO:0061136	1	0	196	110	2	21128	VCP,PITHD1
GO:BP,	labyrinthine layer morphogenesis	GO:0060713	1	0	22	110	1	21128	GRB2
GO:BP,	negative regulation of intracellular protein transport	GO:0090317	1	0	44	110	1	21128	CD36
GO:BP,	negative regulation of small molecule metabolic process	GO:0062014	1	0	101	110	1	21128	CDA
GO:BP,	growth hormone receptor signaling pathway	GO:0060396	1	0	27	110	1	21128	PTK2
GO:BP,	nucleic acid metabolic process	GO:0090304	1	0	7545	110	23	21128	VCP,LTF,SERPINF2,PDLIM1,S100A12,AZGP1,LIMS1,ENDOD1,S100A8,PF4,ITGA6,H1-4,S100A9,ITGB2,WBP2,PTPRC,CD36,PITHD1,TGFB1I1,TSG101,RWDD1,ZNF578,ASH1L
GO:BP,	actin filament bundle organization	GO:0061572	1	0	161	110	3	21128	LCP1,SERPINF2,PDLIM1
GO:BP,	regulation of small molecule metabolic process	GO:0062012	1	0	328	110	2	21128	VCP,CDA
GO:BP,	regulation of type I interferon-mediated signaling pathway	GO:0060338	1	0	40	110	1	21128	PTPN6
GO:BP,	uterus morphogenesis	GO:0061038	1	0	6	110	1	21128	ASH1L
GO:BP,	establishment of endothelial barrier	GO:0061028	1	0	49	110	1	21128	PECAM1
GO:BP,	protein-DNA complex assembly	GO:0065004	1	0	248	110	1	21128	H1-4
GO:BP,	membrane fusion	GO:0061025	1	0	181	110	4	21128	CORO1A,GCA,STX7,VPS4A
GO:BP,	trabecula formation	GO:0060343	1	0	26	110	1	21128	RBP4
GO:BP,	regulation of protein targeting to membrane	GO:0090313	1	0	35	110	2	21128	ITGB2,STOM
GO:BP,	heart trabecula formation	GO:0060347	1	0	15	110	1	21128	RBP4
GO:BP,	hepaticobiliary system development	GO:0061008	1	0	146	110	2	21128	FGL1,CPB2
GO:BP,	protein-containing complex assembly	GO:0065003	1	0	3283	110	15	21128	FGB,FGG,FGA,LCP1,VCP,HRG,SELP,BIN2,CORO1A,H1-4,GRB2,APOM,PTK2,CD36,ASAP1
GO:BP,	positive regulation of macrophage cytokine production	GO:0060907	1	0	24	110	1	21128	CD36
GO:BP,	bone development	GO:0060348	1	0	237	110	5	21128	LTF,GP5,GP1BA,PTPN6,PTPRC
GO:BP,	positive regulation of pattern recognition receptor signaling pathway	GO:0062208	1	0	46	110	1	21128	LTF
GO:BP,	positive regulation of protein targeting to membrane	GO:0090314	1	0	29	110	2	21128	ITGB2,STOM
GO:BP,	bone morphogenesis	GO:0060349	1	0	102	110	1	21128	LTF
GO:BP,	regulation of pattern recognition receptor signaling pathway	GO:0062207	1	0	103	110	2	21128	LTF,CD36
GO:BP,	positive regulation of intracellular protein transport	GO:0090316	1	0	157	110	2	21128	ITGB2,STOM
GO:BP,	regulation of dendritic spine development	GO:0060998	1	0	55	110	1	21128	ASAP1
GO:BP,	muscle structure development	GO:0061061	1	0	663	110	2	21128	PLG,PDLIM1
GO:BP,	positive regulation of myeloid leukocyte cytokine production involved in immune response	GO:0061081	1	0	34	110	1	21128	CD36
GO:BP,	dendritic spine development	GO:0060996	1	0	93	110	1	21128	ASAP1
GO:BP,	myeloid leukocyte cytokine production	GO:0061082	1	0	49	110	1	21128	CD36
GO:BP,	negative regulation of dendritic spine development	GO:0061000	1	0	12	110	1	21128	ASAP1
GO:BP,	establishment of protein localization to membrane	GO:0090150	1	0	489	110	2	21128	ITGB2,STOM
GO:BP,	cell differentiation involved in embryonic placenta development	GO:0060706	1	0	28	110	1	21128	PLG
GO:BP,	heart growth	GO:0060419	1	0	84	110	1	21128	RBP4
GO:BP,	protein localization to lysosome	GO:0061462	1	0	51	110	2	21128	PIK3C3,VPS4A
GO:BP,	early endosome to recycling endosome transport	GO:0061502	1	0	4	110	1	21128	CORO1A
GO:BP,	regulation of muscle system process	GO:0090257	1	0	233	110	1	21128	IL6ST
GO:BP,	late endosome to lysosome transport via multivesicular body sorting pathway	GO:0061764	1	0	2	110	1	21128	VPS4A
GO:BP,	myeloid cell development	GO:0061515	1	0	83	110	4	21128	LTF,GP5,GP1BA,PTPN6
GO:BP,	macrophage proliferation	GO:0061517	1	0	11	110	1	21128	PTK2
GO:BP,	negative regulation of platelet aggregation	GO:0090331	1	0	12	110	1	21128	FGG
GO:BP,	epithelium development	GO:0060429	1	0	1220	110	6	21128	CA2,PECAM1,GRB2,TGFB1I1,IL6ST,TSG101
GO:BP,	positive regulation of canonical Wnt signaling pathway	GO:0090263	1	0	102	110	1	21128	VCP
GO:BP,	mesenchyme development	GO:0060485	1	0	304	110	3	21128	PTK2,S100A4,TGFB1I1
GO:BP,	intestinal epithelial cell development	GO:0060576	1	0	14	110	1	21128	IL6ST
GO:BP,	regulation of cell projection assembly	GO:0060491	1	0	201	110	1	21128	HRG
GO:BP,	muscle tissue development	GO:0060537	1	0	408	110	1	21128	RBP4
GO:BP,	intestinal epithelial cell differentiation	GO:0060575	1	0	24	110	1	21128	IL6ST
GO:BP,	nucleic acid phosphodiester bond hydrolysis	GO:0090305	1	0	253	110	2	21128	AZGP1,ENDOD1
GO:BP,	respiratory system development	GO:0060541	1	0	214	110	1	21128	RBP4
GO:BP,	leukocyte adhesion to vascular endothelial cell	GO:0061756	1	0	48	110	3	21128	SELP,GP1BA,ITGB2
GO:BP,	regulation of peptide hormone secretion	GO:0090276	1	0	187	110	4	21128	FGB,FGG,FGA,RBP4
GO:BP,	late endosomal microautophagy	GO:0061738	1	0	3	110	1	21128	VPS4A
GO:BP,	negative regulation of cell death	GO:0060548	1	0	1001	110	11	21128	FGB,FGG,FGA,LTF,ITGB3,CORO1A,PF4,ITGA6,PTK2,IL6ST,VPS4A
GO:BP,	developmental growth involved in morphogenesis	GO:0060560	1	0	238	110	1	21128	ITSN2
GO:BP,	endoplasmic reticulum stress-induced pre-emptive quality control	GO:0061857	1	0	2	110	1	21128	VCP
GO:BP,	reproductive system development	GO:0061458	1	0	311	110	3	21128	A2M,RBP4,ASH1L
GO:BP,	glial cell activation	GO:0061900	1	0	52	110	3	21128	MMP8,ITGB2,PTPRC
GO:BP,	process utilizing autophagic mechanism	GO:0061919	1	0	562	110	6	21128	VCP,S100A8,S100A9,TSG101,PIK3C3,VPS4A
GO:BP,	organelle membrane fusion	GO:0090174	1	0	122	110	3	21128	CORO1A,STX7,VPS4A
GO:BP,	cytoskeleton-dependent cytokinesis	GO:0061640	1	0	119	110	1	21128	VPS4A
GO:BP,	regulation of cellular response to growth factor stimulus	GO:0090287	1	0	314	110	3	21128	HRG,ITGB3,TGFB1I1
GO:BP,	morphogenesis of a branching epithelium	GO:0061138	1	0	187	110	1	21128	GRB2
GO:BP,	penetration of cumulus oophorus	GO:0061956	1	0	1	110	1	21128	PITHD1
GO:BP,	placenta blood vessel development	GO:0060674	1	0	31	110	1	21128	PLG
GO:BP,	positive regulation of peptide hormone secretion	GO:0090277	1	0	96	110	4	21128	FGB,FGG,FGA,RBP4
GO:BP,	regulation of heart growth	GO:0060420	1	0	61	110	1	21128	RBP4
GO:BP,	trabecula morphogenesis	GO:0061383	1	0	48	110	1	21128	RBP4
GO:BP,	organophosphate biosynthetic process	GO:0090407	1	0	624	110	4	21128	VCP,CDA,PIK3C3,CKMT2
GO:BP,	trophoblast giant cell differentiation	GO:0060707	1	0	14	110	1	21128	PLG
GO:BP,	regulation of superoxide metabolic process	GO:0090322	1	0	28	110	2	21128	ITGB2,CD36
GO:BP,	regulation of platelet aggregation	GO:0090330	1	0	30	110	2	21128	FGG,IL6ST
GO:BP,	renal system vasculature development	GO:0061437	1	0	30	110	2	21128	ITGB3,PECAM1
GO:BP,	branching involved in labyrinthine layer morphogenesis	GO:0060670	1	0	13	110	1	21128	GRB2
GO:BP,	positive regulation of lipid kinase activity	GO:0090218	1	0	36	110	1	21128	PTK2
GO:BP,	embryonic placenta morphogenesis	GO:0060669	1	0	27	110	1	21128	GRB2
GO:BP,	kidney vasculature development	GO:0061440	1	0	30	110	2	21128	ITGB3,PECAM1
GO:BP,	phagosome maturation	GO:0090382	1	0	29	110	1	21128	CORO1A
GO:BP,	connective tissue development	GO:0061448	1	0	277	110	1	21128	ITGB3
GO:BP,	trophoblast cell migration	GO:0061450	1	0	16	110	2	21128	ITGB3,ARHGDIB
GO:BP,	midbody abscission	GO:0061952	1	0	19	110	1	21128	VPS4A
GO:BP,	heart trabecula morphogenesis	GO:0061384	1	0	33	110	1	21128	RBP4
GO:BP,	axon development	GO:0061564	1	0	496	110	1	21128	PTK2
GO:BP,	DNA biosynthetic process	GO:0071897	1	0	200	110	1	21128	VCP
GO:BP,	regulation of biological quality	GO:0065008	1	0	2790	110	25	21128	FGB,VWF,FGG,FGA,PLG,VCP,HBB,HRG,SERPINF2,ITGB3,SELP,F13B,GP5,GP1BA,CORO1A,RBP4,PTPN6,CPB2,PF4,GRB2,PF4V1,PTK2,CD36,C4BPB,IL6ST
GO:BP,	cellular response to growth hormone stimulus	GO:0071378	1	0	27	110	1	21128	PTK2
GO:BP,	positive regulation of glomerular mesangial cell proliferation	GO:0072126	1	0	7	110	1	21128	ITGB3
GO:BP,	regulation of glomerular mesangial cell proliferation	GO:0072124	1	0	10	110	1	21128	ITGB3
GO:BP,	cellular response to steroid hormone stimulus	GO:0071383	1	0	213	110	2	21128	WBP2,RWDD1
GO:BP,	cellular response to estrogen stimulus	GO:0071391	1	0	19	110	1	21128	WBP2
GO:BP,	cellular response to testosterone stimulus	GO:0071394	1	0	11	110	1	21128	RWDD1
GO:BP,	cellular response to lipid	GO:0071396	1	0	598	110	7	21128	LTF,PPBP,PF4,PF4V1,WBP2,CD36,RWDD1
GO:BP,	cell proliferation involved in kidney development	GO:0072111	1	0	21	110	1	21128	ITGB3
GO:BP,	cellular response to lipoprotein particle stimulus	GO:0071402	1	0	32	110	2	21128	ITGB2,CD36
GO:BP,	glomerular mesangial cell proliferation	GO:0072110	1	0	11	110	1	21128	ITGB3
GO:BP,	cellular response to low-density lipoprotein particle stimulus	GO:0071404	1	0	28	110	2	21128	ITGB2,CD36
GO:BP,	cellular response to organic cyclic compound	GO:0071407	1	0	579	110	2	21128	WBP2,RWDD1
GO:BP,	cellular response to organonitrogen compound	GO:0071417	1	0	642	110	5	21128	ITGB3,CA2,GRB2,PTK2,CD36
GO:BP,	regulation of histone H3-K14 acetylation	GO:0071440	1	0	6	110	1	21128	WBP2
GO:BP,	glomerular mesangium development	GO:0072109	1	0	16	110	1	21128	ITGB3
GO:BP,	regulation of stem cell proliferation	GO:0072091	1	0	90	110	1	21128	PTPRC
GO:BP,	stem cell proliferation	GO:0072089	1	0	123	110	1	21128	PTPRC
GO:BP,	positive regulation of histone H3-K14 acetylation	GO:0071442	1	0	4	110	1	21128	WBP2
GO:BP,	cellular response to hydroperoxide	GO:0071447	1	0	8	110	1	21128	CD36
GO:BP,	cellular response to peptide hormone stimulus	GO:0071375	1	0	302	110	4	21128	ITGB3,CA2,GRB2,PTK2
GO:BP,	kidney epithelium development	GO:0072073	1	0	149	110	1	21128	PECAM1
GO:BP,	cellular response to growth factor stimulus	GO:0071363	1	0	675	110	7	21128	HRG,ITGB3,LIMS1,CORO1A,GRB2,PTK2,TGFB1I1
GO:BP,	cellular response to tumor necrosis factor	GO:0071356	1	0	225	110	1	21128	LIMS1
GO:BP,	cellular response to lipopolysaccharide	GO:0071222	1	0	209	110	5	21128	LTF,PPBP,PF4,PF4V1,CD36
GO:BP,	cellular response to lipoteichoic acid	GO:0071223	1	0	10	110	1	21128	CD36
GO:BP,	cellular response to arsenic-containing substance	GO:0071243	1	0	20	110	1	21128	VCP
GO:BP,	purine-containing compound metabolic process	GO:0072521	1	0	587	110	2	21128	VCP,DPYD
GO:BP,	cellular response to mechanical stimulus	GO:0071260	1	0	75	110	1	21128	ITGB3
GO:BP,	flavin adenine dinucleotide catabolic process	GO:0072389	1	0	1	110	1	21128	VCP
GO:BP,	flavin adenine dinucleotide metabolic process	GO:0072387	1	0	3	110	1	21128	VCP
GO:BP,	cellular response to organic substance	GO:0071310	1	0	1993	110	21	21128	FGB,FGG,VCP,LTF,ITGB3,CA2,PPBP,LIMS1,CORO1A,PTPN6,LSP1,CPB2,PF4,GRB2,PF4V1,WBP2,PTPRC,PTK2,CD36,IL6ST,RWDD1
GO:BP,	cellular response to carbohydrate stimulus	GO:0071322	1	0	153	110	1	21128	CPB2
GO:BP,	cellular response to monosaccharide stimulus	GO:0071326	1	0	141	110	1	21128	CPB2
GO:BP,	blood coagulation, common pathway	GO:0072377	1	0	2	110	1	21128	FGA
GO:BP,	cellular response to hexose stimulus	GO:0071331	1	0	139	110	1	21128	CPB2
GO:BP,	cellular response to glucose stimulus	GO:0071333	1	0	137	110	1	21128	CPB2
GO:BP,	cellular response to cytokine stimulus	GO:0071345	1	0	823	110	11	21128	FGB,FGG,PPBP,LIMS1,CORO1A,PTPN6,LSP1,PF4,PF4V1,PTPRC,IL6ST
GO:BP,	cellular response to interleukin-1	GO:0071347	1	0	106	110	2	21128	FGB,FGG
GO:BP,	circulatory system development	GO:0072359	1	0	1118	110	11	21128	PLG,HRG,SERPINF2,ITGB3,ITGA2B,PDLIM1,RBP4,PECAM1,PF4,ITGB2,PTK2
GO:BP,	cellular response to interleukin-4	GO:0071353	1	0	32	110	1	21128	CORO1A
GO:BP,	cellular response to interleukin-6	GO:0071354	1	0	33	110	2	21128	FGG,IL6ST
GO:BP,	vesicle uncoating	GO:0072319	1	0	9	110	1	21128	VPS4A
GO:BP,	cellular response to type I interferon	GO:0071357	1	0	77	110	1	21128	PTPN6
GO:BP,	cellular response to bacterial lipopeptide	GO:0071221	1	0	6	110	1	21128	CD36
GO:BP,	cellular response to oxygen radical	GO:0071450	1	0	21	110	1	21128	CD36
GO:BP,	cellular response to xenobiotic stimulus	GO:0071466	1	0	183	110	2	21128	ITGB3,S100A12
GO:BP,	membrane assembly	GO:0071709	1	0	60	110	1	21128	VPS4A
GO:BP,	ER-associated misfolded protein catabolic process	GO:0071712	1	0	12	110	1	21128	VCP
GO:BP,	response to diacyl bacterial lipopeptide	GO:0071724	1	0	4	110	1	21128	CD36
GO:BP,	cellular response to diacyl bacterial lipopeptide	GO:0071726	1	0	4	110	1	21128	CD36
GO:BP,	nephron development	GO:0072006	1	0	154	110	2	21128	ITGB3,PECAM1
GO:BP,	renal system development	GO:0072001	1	0	323	110	3	21128	ITGB3,RBP4,PECAM1
GO:BP,	nuclear membrane organization	GO:0071763	1	0	46	110	1	21128	VPS4A
GO:BP,	response to fibroblast growth factor	GO:0071774	1	0	112	110	1	21128	GRB2
GO:BP,	extracellular exosome assembly	GO:0071971	1	0	7	110	1	21128	TSG101
GO:BP,	regulation of podosome assembly	GO:0071801	1	0	14	110	2	21128	LCP1,ASAP1
GO:BP,	positive regulation of podosome assembly	GO:0071803	1	0	11	110	2	21128	LCP1,ASAP1
GO:BP,	protein transmembrane transport	GO:0071806	1	0	64	110	1	21128	AZGP1
GO:BP,	positive regulation of protein serine/threonine kinase activity	GO:0071902	1	0	227	110	3	21128	LTF,S100A12,PTPRC
GO:BP,	protein-DNA complex subunit organization	GO:0071824	1	0	269	110	1	21128	H1-4
GO:BP,	protein-lipid complex subunit organization	GO:0071825	1	0	48	110	1	21128	APOM
GO:BP,	ribonucleoprotein complex subunit organization	GO:0071826	1	0	1641	110	1	21128	VCP
GO:BP,	plasma lipoprotein particle organization	GO:0071827	1	0	45	110	1	21128	APOM
GO:BP,	negative regulation of protein serine/threonine kinase activity	GO:0071901	1	0	113	110	1	21128	PTPN6
GO:BP,	cellular component organization or biogenesis	GO:0071840	1	0	8262	110	52	21128	FGB,FGG,FGA,PLG,LCP1,VCP,IGHM,IGHG2,HRG,SERPINF2,IGHG4,ITGB3,SELP,BIN2,ARHGDIB,PDLIM1,LIMS1,CORO1A,IGLC2,S100A8,CPB2,MANF,MMP8,CDA,PECAM1,ITGA6,H1-4,GRB2,PTPA,IQGAP2,APOM,S100A9,GCA,ITGB2,STX7,WBP2,PTPRC,IGHV3-23,PTK2,IGHV3-7,CD36,IGHV5-51,RP2,RUFY1,ITSN2,IGHV2-26,IGHV2-70D,TSG101,ASAP1,PIK3C3,VPS4A,ASH1L
GO:BP,	nitrogen compound transport	GO:0071705	1	0	2252	110	23	21128	FGB,FGG,FGA,LCP1,VCP,HBB,HRG,ITGB3,CA2,AZGP1,S100A8,RBP4,CANX,ITGB2,STX7,RAB27B,STOM,CD36,RP2,RUFY1,TSG101,PIK3C3,VPS4A
GO:BP,	cellular response to superoxide	GO:0071451	1	0	21	110	1	21128	CD36
GO:BP,	organic substance metabolic process	GO:0071704	1	0	13937	110	58	21128	A2M,FGB,FGG,FGA,C4A,PLG,VCP,C4BPA,LTF,HRG,SERPINF2,ITGB3,PDLIM1,F13B,S100A12,AZGP1,GP5,GP1BA,LIMS1,ENDOD1,MASP1,S100A8,RBP4,PTPN6,CPB2,MMP8,MLEC,CDA,PECAM1,CANX,PF4,ITGA6,H1-4,PTPA,CPN1,APOM,S100A9,ITGB2,WBP2,PTPRC,PTK2,CD36,COLEC11,PLBD1,C4BPB,PITHD1,TGFB1I1,IL6ST,GUSB,TSG101,MASP2,RWDD1,DPYD,PIK3C3,VPS4A,CKMT2,ZNF578,ASH1L
GO:BP,	nephron epithelium development	GO:0072009	1	0	119	110	1	21128	PECAM1
GO:BP,	cellular response to radiation	GO:0071478	1	0	189	110	1	21128	GRB2
GO:BP,	cellular response to ionizing radiation	GO:0071479	1	0	75	110	1	21128	GRB2
GO:BP,	cellular response to endogenous stimulus	GO:0071495	1	0	1445	110	12	21128	FGB,HRG,ITGB3,CA2,LIMS1,CORO1A,GRB2,WBP2,PTK2,CD36,TGFB1I1,RWDD1
GO:BP,	cellular response to external stimulus	GO:0071496	1	0	328	110	4	21128	ITGB3,CDA,PTPRC,PIK3C3
GO:BP,	dopaminergic neuron differentiation	GO:0071542	1	0	43	110	1	21128	MANF
GO:BP,	glomerulus vasculature development	GO:0072012	1	0	28	110	2	21128	ITGB3,PECAM1
GO:BP,	glomerular endothelium development	GO:0072011	1	0	4	110	1	21128	PECAM1
GO:BP,	response to transforming growth factor beta	GO:0071559	1	0	263	110	3	21128	LIMS1,PTK2,TGFB1I1
GO:BP,	cellular response to transforming growth factor beta stimulus	GO:0071560	1	0	257	110	3	21128	LIMS1,PTK2,TGFB1I1
GO:BP,	transforming growth factor beta production	GO:0071604	1	0	41	110	1	21128	SERPINF2
GO:BP,	glomerular epithelium development	GO:0072010	1	0	26	110	1	21128	PECAM1
GO:BP,	regulation of granulocyte chemotaxis	GO:0071622	1	0	52	110	1	21128	PTK2
GO:BP,	regulation of transforming growth factor beta production	GO:0071634	1	0	38	110	1	21128	SERPINF2
GO:BP,	positive regulation of transforming growth factor beta production	GO:0071636	1	0	20	110	1	21128	SERPINF2
GO:BP,	mononuclear cell migration	GO:0071674	1	0	205	110	6	21128	PLG,ITGB3,S100A12,CORO1A,PECAM1,PTK2
GO:BP,	regulation of mononuclear cell migration	GO:0071675	1	0	123	110	3	21128	ITGB3,CORO1A,PTK2
GO:BP,	positive regulation of mononuclear cell migration	GO:0071677	1	0	75	110	2	21128	ITGB3,CORO1A
GO:BP,	protein localization to extracellular region	GO:0071692	1	0	359	110	6	21128	FGB,FGG,FGA,RBP4,CANX,PIK3C3
GO:BP,	anatomical structure maturation	GO:0071695	1	0	253	110	2	21128	FGG,LTF
GO:BP,	organic substance transport	GO:0071702	1	0	2680	110	26	21128	FGB,FGG,FGA,LCP1,VCP,HBB,HRG,ITGB3,CA2,HBD,AZGP1,PPBP,S100A8,RBP4,CANX,APOM,ITGB2,STX7,RAB27B,STOM,CD36,RP2,RUFY1,TSG101,PIK3C3,VPS4A
GO:BP,	cellular response to bacterial lipoprotein	GO:0071220	1	0	6	110	1	21128	CD36
GO:BP,	cellular response to molecule of bacterial origin	GO:0071219	1	0	218	110	5	21128	LTF,PPBP,PF4,PF4V1,CD36
GO:BP,	cellular response to misfolded protein	GO:0071218	1	0	23	110	1	21128	VCP
GO:BP,	establishment of protein localization to chromosome	GO:0070199	1	0	27	110	1	21128	WBP2
GO:BP,	lytic vacuole organization	GO:0080171	1	0	99	110	1	21128	CORO1A
GO:BP,	extracellular matrix constituent secretion	GO:0070278	1	0	14	110	1	21128	CPB2
GO:BP,	renal absorption	GO:0070293	1	0	30	110	1	21128	HBB
GO:BP,	regulation of cellular response to stress	GO:0080135	1	0	711	110	4	21128	SERPINF2,MANF,MMP8,CD36
GO:BP,	regulation of primary metabolic process	GO:0080090	1	0	5882	110	34	21128	A2M,C4A,VCP,C4BPA,LTF,HRG,SERPINF2,ITGB3,PDLIM1,S100A12,LIMS1,S100A8,PTPN6,CPB2,CDA,PECAM1,PF4,ITGA6,H1-4,PTPA,S100A9,ITGB2,WBP2,PTPRC,PTK2,CD36,C4BPB,PITHD1,TGFB1I1,IL6ST,TSG101,RWDD1,ZNF578,ASH1L
GO:BP,	regulation of stress-activated protein kinase signaling cascade	GO:0070302	1	0	196	110	2	21128	SERPINF2,MMP8
GO:BP,	positive regulation of stress-activated protein kinase signaling cascade	GO:0070304	1	0	130	110	2	21128	SERPINF2,MMP8
GO:BP,	response to bacterial lipopeptide	GO:0070339	1	0	6	110	1	21128	CD36
GO:BP,	negative regulation of ERK1 and ERK2 cascade	GO:0070373	1	0	73	110	1	21128	PTPRC
GO:BP,	response to lipoteichoic acid	GO:0070391	1	0	10	110	1	21128	CD36
GO:BP,	regulation of protein serine/threonine kinase activity	GO:0071900	1	0	386	110	5	21128	LTF,S100A12,PTPN6,PTPRC,TSG101
GO:BP,	thymocyte migration	GO:0072679	1	0	7	110	1	21128	CORO1A
GO:BP,	leukocyte aggregation	GO:0070486	1	0	13	110	2	21128	S100A8,S100A9
GO:BP,	T cell migration	GO:0072678	1	0	73	110	2	21128	ITGB3,CORO1A
GO:BP,	thrombin-activated receptor signaling pathway	GO:0070493	1	0	12	110	2	21128	GP1BA,IQGAP2
GO:BP,	cholesterol import	GO:0070508	1	0	10	110	1	21128	CD36
GO:BP,	lymphocyte migration	GO:0072676	1	0	123	110	2	21128	ITGB3,CORO1A
GO:BP,	neutrophil extravasation	GO:0072672	1	0	14	110	1	21128	PECAM1
GO:BP,	positive regulation of biomineral tissue development	GO:0070169	1	0	54	110	1	21128	LTF
GO:BP,	establishment of protein localization to vacuole	GO:0072666	1	0	58	110	3	21128	TSG101,PIK3C3,VPS4A
GO:BP,	regulation of biomineral tissue development	GO:0070167	1	0	101	110	1	21128	LTF
GO:BP,	regulation of anatomical structure size	GO:0090066	1	0	511	110	7	21128	FGB,FGG,FGA,HBB,SERPINF2,CORO1A,GRB2
GO:BP,	epithelium migration	GO:0090132	1	0	304	110	5	21128	HRG,ITGB3,CORO1A,ITGB2,PTK2
GO:BP,	neuron cellular homeostasis	GO:0070050	1	0	42	110	1	21128	CA2
GO:BP,	tissue migration	GO:0090130	1	0	310	110	5	21128	HRG,ITGB3,CORO1A,ITGB2,PTK2
GO:BP,	glycosylation	GO:0070085	1	0	249	110	1	21128	MLEC
GO:BP,	ubiquitin-dependent endocytosis	GO:0070086	1	0	5	110	1	21128	TSG101
GO:BP,	chemokine-mediated signaling pathway	GO:0070098	1	0	90	110	3	21128	PPBP,PF4,PF4V1
GO:BP,	regulation of cell-substrate junction assembly	GO:0090109	1	0	64	110	3	21128	HRG,LIMS1,PTK2
GO:BP,	negative regulation of transmembrane receptor protein serine/threonine kinase signaling pathway	GO:0090101	1	0	146	110	1	21128	TGFB1I1
GO:BP,	positive regulation of transmembrane receptor protein serine/threonine kinase signaling pathway	GO:0090100	1	0	116	110	1	21128	TGFB1I1
GO:BP,	regulation of transmembrane receptor protein serine/threonine kinase signaling pathway	GO:0090092	1	0	273	110	1	21128	TGFB1I1
GO:BP,	regulation of dipeptide transport	GO:0090089	1	0	2	110	1	21128	CA2
GO:BP,	interleukin-6-mediated signaling pathway	GO:0070102	1	0	18	110	1	21128	IL6ST
GO:BP,	regulation of oligopeptide transport	GO:0090088	1	0	2	110	1	21128	CA2
GO:BP,	regulation of interleukin-6-mediated signaling pathway	GO:0070103	1	0	5	110	1	21128	IL6ST
GO:BP,	regulation of protein deubiquitination	GO:0090085	1	0	12	110	1	21128	VCP
GO:BP,	foam cell differentiation	GO:0090077	1	0	36	110	3	21128	ITGB3,PF4,CD36
GO:BP,	negative regulation of interleukin-6-mediated signaling pathway	GO:0070104	1	0	2	110	1	21128	IL6ST
GO:BP,	interleukin-27-mediated signaling pathway	GO:0070106	1	0	7	110	1	21128	IL6ST
GO:BP,	ciliary neurotrophic factor-mediated signaling pathway	GO:0070120	1	0	5	110	1	21128	IL6ST
GO:BP,	histone H3-K4 trimethylation	GO:0080182	1	0	22	110	1	21128	H1-4
GO:BP,	protein K63-linked deubiquitination	GO:0070536	1	0	38	110	1	21128	VCP
GO:BP,	protein localization to vacuole	GO:0072665	1	0	77	110	3	21128	TSG101,PIK3C3,VPS4A
GO:BP,	protein localization to plasma membrane	GO:0072659	1	0	284	110	2	21128	STX7,VPS4A
GO:BP,	negative regulation of leukocyte proliferation	GO:0070664	1	0	96	110	1	21128	PTPN6
GO:BP,	positive regulation of leukocyte proliferation	GO:0070665	1	0	165	110	4	21128	CORO1A,PTPRC,PTK2,IL6ST
GO:BP,	response to interleukin-4	GO:0070670	1	0	35	110	1	21128	CORO1A
GO:BP,	cellular macromolecule localization	GO:0070727	1	0	2718	110	22	21128	FGB,FGG,FGA,LCP1,VCP,ITGB3,AZGP1,LIMS1,RBP4,PECAM1,CANX,ITGB2,STX7,WBP2,RAB27B,STOM,CD36,RP2,RUFY1,TSG101,PIK3C3,VPS4A
GO:BP,	histone H3-K27 methylation	GO:0070734	1	0	18	110	1	21128	H1-4
GO:BP,	response to interleukin-6	GO:0070741	1	0	36	110	2	21128	FGG,IL6ST
GO:BP,	bicellular tight junction assembly	GO:0070830	1	0	66	110	1	21128	PECAM1
GO:BP,	inclusion body assembly	GO:0070841	1	0	25	110	1	21128	VCP
GO:BP,	aggresome assembly	GO:0070842	1	0	6	110	1	21128	VCP
GO:BP,	response to growth factor	GO:0070848	1	0	705	110	7	21128	HRG,ITGB3,LIMS1,CORO1A,GRB2,PTK2,TGFB1I1
GO:BP,	type I interferon-mediated signaling pathway	GO:0060337	1	0	75	110	1	21128	PTPN6
GO:BP,	organelle assembly	GO:0070925	1	0	944	110	9	21128	LCP1,BIN2,CORO1A,STX7,RP2,TSG101,ASAP1,PIK3C3,VPS4A
GO:BP,	bone maturation	GO:0070977	1	0	29	110	1	21128	LTF
GO:BP,	neuron death	GO:0070997	1	0	367	110	3	21128	CORO1A,ITGB2,IL6ST
GO:BP,	protein localization to chromatin	GO:0071168	1	0	54	110	2	21128	VCP,WBP2
GO:BP,	establishment of protein localization to chromatin	GO:0071169	1	0	9	110	1	21128	WBP2
GO:BP,	cellular response to abiotic stimulus	GO:0071214	1	0	336	110	2	21128	ITGB3,GRB2
GO:BP,	cellular response to biotic stimulus	GO:0071216	1	0	246	110	6	21128	LTF,PPBP,CDA,PF4,PF4V1,CD36
GO:BP,	cellular response to external biotic stimulus	GO:0071217	1	0	1	110	1	21128	CDA
GO:BP,	regulation of leukocyte proliferation	GO:0070663	1	0	267	110	5	21128	CORO1A,PTPN6,PTPRC,PTK2,IL6ST
GO:BP,	leukocyte proliferation	GO:0070661	1	0	347	110	5	21128	CORO1A,PTPN6,PTPRC,PTK2,IL6ST
GO:BP,	purine-containing compound biosynthetic process	GO:0072522	1	0	287	110	1	21128	VCP
GO:BP,	purine-containing compound catabolic process	GO:0072523	1	0	58	110	1	21128	DPYD
GO:BP,	response to fatty acid	GO:0070542	1	0	63	110	1	21128	CD36
GO:BP,	response to linoleic acid	GO:0070543	1	0	3	110	1	21128	CD36
GO:BP,	response to interleukin-1	GO:0070555	1	0	133	110	2	21128	FGB,FGG
GO:BP,	protein localization to membrane	GO:0072657	1	0	808	110	4	21128	ITGB2,STX7,STOM,VPS4A
GO:BP,	establishment of protein localization to organelle	GO:0072594	1	0	664	110	5	21128	WBP2,CD36,TSG101,PIK3C3,VPS4A
GO:BP,	clathrin-dependent endocytosis	GO:0072583	1	0	47	110	2	21128	CANX,ITSN2
GO:BP,	endothelial cell apoptotic process	GO:0072577	1	0	56	110	3	21128	FGB,FGG,FGA
GO:BP,	liver morphogenesis	GO:0072576	1	0	25	110	2	21128	FGL1,CPB2
GO:BP,	calcium ion transmembrane transport	GO:0070588	1	0	343	110	6	21128	ITGB3,GP5,GP1BA,CORO1A,PTPN6,PTPRC
GO:BP,	protein-lipid complex assembly	GO:0065005	1	0	29	110	1	21128	APOM
GO:BP,	epithelial cell proliferation involved in liver morphogenesis	GO:0072575	1	0	24	110	2	21128	FGL1,CPB2
GO:BP,	blood microparticle formation	GO:0072564	1	0	2	110	1	21128	CD36
GO:BP,	tumor necrosis factor (ligand) superfamily member 11 production	GO:0072535	1	0	3	110	1	21128	LTF
GO:BP,	pyrimidine-containing compound catabolic process	GO:0072529	1	0	38	110	2	21128	CDA,DPYD
GO:BP,	regulation of protein processing	GO:0070613	1	0	67	110	2	21128	SERPINF2,CPB2
GO:BP,	protein modification by small protein removal	GO:0070646	1	0	185	110	1	21128	VCP
GO:BP,	pyrimidine-containing compound biosynthetic process	GO:0072528	1	0	44	110	1	21128	CDA
GO:BP,	pyrimidine-containing compound metabolic process	GO:0072527	1	0	89	110	2	21128	CDA,DPYD
GO:BP,	pyridine-containing compound metabolic process	GO:0072524	1	0	90	110	1	21128	VCP
GO:BP,	protein modification by small protein conjugation or removal	GO:0070647	1	0	1052	110	2	21128	VCP,TSG101
GO:BP,	hepatocyte proliferation	GO:0072574	1	0	24	110	2	21128	FGL1,CPB2
GO:BP,	response to oxygen levels	GO:0070482	1	0	331	110	1	21128	PDLIM1
GO:BP,	positive regulation of stress fiber assembly	GO:0051496	1	0	52	110	1	21128	SERPINF2
GO:BP,	cilium movement involved in cell motility	GO:0060294	1	0	148	110	1	21128	ASH1L
GO:BP,	phosphatidylinositol phosphate biosynthetic process	GO:0046854	1	0	66	110	1	21128	PIK3C3
GO:BP,	isoprenoid transport	GO:0046864	1	0	5	110	1	21128	RBP4
GO:BP,	terpenoid transport	GO:0046865	1	0	5	110	1	21128	RBP4
GO:BP,	hormone secretion	GO:0046879	1	0	298	110	4	21128	FGB,FGG,FGA,RBP4
GO:BP,	regulation of hormone secretion	GO:0046883	1	0	242	110	4	21128	FGB,FGG,FGA,RBP4
GO:BP,	positive regulation of hormone secretion	GO:0046887	1	0	127	110	4	21128	FGB,FGG,FGA,RBP4
GO:BP,	response to cycloheximide	GO:0046898	1	0	4	110	1	21128	CDA
GO:BP,	intracellular transport	GO:0046907	1	0	1806	110	12	21128	LCP1,VCP,CORO1A,ITGB2,STX7,RAB27B,STOM,CD36,ITSN2,TSG101,PIK3C3,VPS4A
GO:BP,	cellular transition metal ion homeostasis	GO:0046916	1	0	113	110	3	21128	LCN2,S100A8,S100A9
GO:BP,	carboxylic acid transport	GO:0046942	1	0	290	110	1	21128	CD36
GO:BP,	regulation of bone remodeling	GO:0046850	1	0	50	110	1	21128	ITGB3
GO:BP,	antigen processing and presentation of peptide antigen	GO:0048002	1	0	63	110	1	21128	AZGP1
GO:BP,	vascular endothelial growth factor receptor signaling pathway	GO:0048010	1	0	55	110	2	21128	ITGB3,PTK2
GO:BP,	ephrin receptor signaling pathway	GO:0048013	1	0	52	110	1	21128	PTK2
GO:BP,	phosphatidylinositol-mediated signaling	GO:0048015	1	0	176	110	4	21128	SELP,PTPN6,PTK2,PIK3C3
GO:BP,	inositol lipid-mediated signaling	GO:0048017	1	0	180	110	4	21128	SELP,PTPN6,PTK2,PIK3C3
GO:BP,	focal adhesion assembly	GO:0048041	1	0	86	110	3	21128	HRG,LIMS1,PTK2
GO:BP,	fibroblast proliferation	GO:0048144	1	0	107	110	1	21128	ITGB3
GO:BP,	regulation of fibroblast proliferation	GO:0048145	1	0	90	110	1	21128	ITGB3
GO:BP,	positive regulation of fibroblast proliferation	GO:0048146	1	0	54	110	1	21128	ITGB3
GO:BP,	Golgi vesicle transport	GO:0048193	1	0	305	110	2	21128	VCP,RP2
GO:BP,	male gamete generation	GO:0048232	1	0	616	110	1	21128	PITHD1
GO:BP,	platelet-derived growth factor receptor signaling pathway	GO:0048008	1	0	58	110	1	21128	ITGB3
GO:BP,	bone remodeling	GO:0046849	1	0	90	110	1	21128	ITGB3
GO:BP,	negative regulation of nucleocytoplasmic transport	GO:0046823	1	0	23	110	1	21128	CD36
GO:BP,	regulation of nucleocytoplasmic transport	GO:0046822	1	0	110	110	1	21128	CD36
GO:BP,	regulation of Ras protein signal transduction	GO:0046578	1	0	201	110	1	21128	ARHGDIB
GO:BP,	regulation of organ growth	GO:0046620	1	0	88	110	1	21128	RBP4
GO:BP,	negative regulation of organ growth	GO:0046621	1	0	31	110	1	21128	RBP4
GO:BP,	gamma-delta T cell activation	GO:0046629	1	0	21	110	1	21128	PTPRC
GO:BP,	alpha-beta T cell activation	GO:0046631	1	0	169	110	1	21128	PTPRC
GO:BP,	alpha-beta T cell proliferation	GO:0046633	1	0	48	110	1	21128	PTPRC
GO:BP,	regulation of alpha-beta T cell activation	GO:0046634	1	0	113	110	1	21128	PTPRC
GO:BP,	positive regulation of alpha-beta T cell activation	GO:0046635	1	0	71	110	1	21128	PTPRC
GO:BP,	regulation of alpha-beta T cell proliferation	GO:0046640	1	0	45	110	1	21128	PTPRC
GO:BP,	positive regulation of alpha-beta T cell proliferation	GO:0046641	1	0	25	110	1	21128	PTPRC
GO:BP,	regulation of gamma-delta T cell activation	GO:0046643	1	0	10	110	1	21128	PTPRC
GO:BP,	positive regulation of gamma-delta T cell activation	GO:0046645	1	0	8	110	1	21128	PTPRC
GO:BP,	lymphocyte proliferation	GO:0046651	1	0	306	110	4	21128	CORO1A,PTPN6,PTPRC,IL6ST
GO:BP,	female sex differentiation	GO:0046660	1	0	124	110	2	21128	A2M,RBP4
GO:BP,	response to arsenic-containing substance	GO:0046685	1	0	32	110	1	21128	VCP
GO:BP,	decidualization	GO:0046697	1	0	25	110	1	21128	ASH1L
GO:BP,	heterocycle catabolic process	GO:0046700	1	0	460	110	3	21128	VCP,CDA,DPYD
GO:BP,	muscle cell cellular homeostasis	GO:0046716	1	0	26	110	1	21128	PLG
GO:BP,	viral entry into host cell	GO:0046718	1	0	152	110	1	21128	ITGB3
GO:BP,	non-lytic viral release	GO:0046753	1	0	16	110	1	21128	VPS4A
GO:BP,	viral budding	GO:0046755	1	0	28	110	2	21128	TSG101,VPS4A
GO:BP,	viral budding from plasma membrane	GO:0046761	1	0	15	110	1	21128	VPS4A
GO:BP,	protein autophosphorylation	GO:0046777	1	0	230	110	2	21128	PTPRC,PTK2
GO:BP,	macrophage chemotaxis	GO:0048246	1	0	42	110	1	21128	PTK2
GO:BP,	development of primary female sexual characteristics	GO:0046545	1	0	109	110	1	21128	A2M
GO:BP,	regulation of receptor-mediated endocytosis	GO:0048259	1	0	108	110	1	21128	ITGB3
GO:BP,	vesicle docking	GO:0048278	1	0	64	110	1	21128	STX7
GO:BP,	camera-type eye morphogenesis	GO:0048593	1	0	130	110	1	21128	RBP4
GO:BP,	embryonic morphogenesis	GO:0048598	1	0	618	110	6	21128	ITGB3,RBP4,MMP8,GRB2,ITGB2,TGFB1I1
GO:BP,	reproductive structure development	GO:0048608	1	0	307	110	3	21128	A2M,RBP4,ASH1L
GO:BP,	multicellular organismal reproductive process	GO:0048609	1	0	892	110	3	21128	A2M,PITHD1,ASH1L
GO:BP,	regulation of developmental growth	GO:0048638	1	0	323	110	2	21128	RBP4,ITSN2
GO:BP,	positive regulation of developmental growth	GO:0048639	1	0	163	110	1	21128	ITSN2
GO:BP,	negative regulation of developmental growth	GO:0048640	1	0	109	110	1	21128	RBP4
GO:BP,	anatomical structure formation involved in morphogenesis	GO:0048646	1	0	1168	110	12	21128	HRG,ITGB3,ITGA2B,RBP4,PTPN6,MMP8,UNC13D,PF4,GRB2,ITGB2,PTK2,CD36
GO:BP,	smooth muscle cell proliferation	GO:0048659	1	0	147	110	2	21128	SERPINF2,ITGB3
GO:BP,	regulation of smooth muscle cell proliferation	GO:0048660	1	0	142	110	2	21128	SERPINF2,ITGB3
GO:BP,	eye morphogenesis	GO:0048592	1	0	166	110	1	21128	RBP4
GO:BP,	positive regulation of smooth muscle cell proliferation	GO:0048661	1	0	85	110	2	21128	SERPINF2,ITGB3
GO:BP,	cell morphogenesis involved in neuron differentiation	GO:0048667	1	0	577	110	1	21128	PTK2
GO:BP,	generation of neurons	GO:0048699	1	0	1473	110	6	21128	MANF,ITGA6,S100A9,PTK2,ITSN2,ASAP1
GO:BP,	skeletal system morphogenesis	GO:0048705	1	0	232	110	1	21128	LTF
GO:BP,	embryonic skeletal system development	GO:0048706	1	0	129	110	1	21128	RBP4
GO:BP,	astrocyte differentiation	GO:0048708	1	0	81	110	3	21128	S100A8,S100A9,IL6ST
GO:BP,	regulation of astrocyte differentiation	GO:0048710	1	0	29	110	1	21128	IL6ST
GO:BP,	positive regulation of astrocyte differentiation	GO:0048711	1	0	13	110	1	21128	IL6ST
GO:BP,	tissue morphogenesis	GO:0048729	1	0	633	110	4	21128	ITGB3,CA2,GRB2,TGFB1I1
GO:BP,	system development	GO:0048731	1	0	3962	110	27	21128	A2M,PLG,LTF,HRG,SERPINF2,ITGB3,ITGA2B,PDLIM1,FGL1,GP5,GP1BA,S100A8,RBP4,PTPN6,CPB2,MANF,PECAM1,PF4,ITGA6,S100A9,ITGB2,PTPRC,PTK2,IL6ST,ITSN2,ASAP1,ASH1L
GO:BP,	gland development	GO:0048732	1	0	445	110	3	21128	FGL1,CPB2,ASH1L
GO:BP,	neuron development	GO:0048666	1	0	1130	110	6	21128	MANF,ITGA6,S100A9,PTK2,ITSN2,ASAP1
GO:BP,	developmental growth	GO:0048589	1	0	652	110	3	21128	PLG,RBP4,ITSN2
GO:BP,	developmental cell growth	GO:0048588	1	0	224	110	1	21128	ITSN2
GO:BP,	embryonic organ development	GO:0048568	1	0	461	110	4	21128	A2M,PLG,RBP4,GRB2
GO:BP,	organelle fusion	GO:0048284	1	0	154	110	3	21128	CORO1A,STX7,VPS4A
GO:BP,	organelle fission	GO:0048285	1	0	498	110	1	21128	VPS4A
GO:BP,	isotype switching to IgG isotypes	GO:0048291	1	0	15	110	1	21128	PTPRC
GO:BP,	regulation of isotype switching to IgG isotypes	GO:0048302	1	0	14	110	1	21128	PTPRC
GO:BP,	positive regulation of isotype switching to IgG isotypes	GO:0048304	1	0	10	110	1	21128	PTPRC
GO:BP,	mesoderm morphogenesis	GO:0048332	1	0	75	110	1	21128	ITGB3
GO:BP,	mesodermal cell differentiation	GO:0048333	1	0	33	110	1	21128	ITGB3
GO:BP,	cell development	GO:0048468	1	0	2728	110	17	21128	FGG,LTF,GP5,GP1BA,S100A8,PTPN6,MANF,PECAM1,PF4,ITGA6,S100A9,PTPRC,PTK2,PITHD1,IL6ST,ITSN2,ASAP1
GO:BP,	cell maturation	GO:0048469	1	0	190	110	1	21128	FGG
GO:BP,	synaptic vesicle endocytosis	GO:0048488	1	0	67	110	3	21128	CANX,RAB27B,ITSN2
GO:BP,	rhythmic process	GO:0048511	1	0	307	110	1	21128	A2M
GO:BP,	animal organ development	GO:0048513	1	0	3109	110	21	21128	A2M,PLG,LCP1,LTF,ITGB3,PDLIM1,FGL1,GP5,GP1BA,RBP4,PTPN6,CPB2,PECAM1,ITGA6,GRB2,PTPRC,PTK2,S100A4,TGFB1I1,TSG101,ASH1L
GO:BP,	blood vessel morphogenesis	GO:0048514	1	0	618	110	7	21128	HRG,SERPINF2,ITGB3,ITGA2B,PF4,ITGB2,PTK2
GO:BP,	spermatid differentiation	GO:0048515	1	0	201	110	1	21128	PITHD1
GO:BP,	negative regulation of biological process	GO:0048519	1	0	5927	110	43	21128	A2M,FGB,FGG,FGA,C4A,PLG,VCP,C4BPA,LTF,HRG,SERPINF2,ITGB3,ARHGDIB,FGL1,AZGP1,GP5,GP1BA,LIMS1,CORO1A,MASP1,RBP4,PTPN6,CPB2,MMP8,CDA,PF4,ITGA6,H1-4,PTPA,APOM,SKAP2,ITGB2,RGS10,PTPRC,PTK2,CD36,C4BPB,TGFB1I1,IL6ST,TSG101,ASAP1,VPS4A,ASH1L
GO:BP,	negative regulation of cellular process	GO:0048523	1	0	4755	110	35	21128	FGB,FGG,FGA,PLG,VCP,LTF,HRG,ITGB3,ARHGDIB,FGL1,AZGP1,GP5,GP1BA,LIMS1,CORO1A,RBP4,PTPN6,CPB2,CDA,PF4,ITGA6,H1-4,PTPA,APOM,SKAP2,ITGB2,RGS10,PTPRC,PTK2,CD36,TGFB1I1,IL6ST,TSG101,VPS4A,ASH1L
GO:BP,	positive regulation of viral process	GO:0048524	1	0	65	110	3	21128	STOM,TSG101,VPS4A
GO:BP,	negative regulation of viral process	GO:0048525	1	0	91	110	1	21128	LTF
GO:BP,	hematopoietic or lymphoid organ development	GO:0048534	1	0	97	110	1	21128	PTPRC
GO:BP,	bone marrow development	GO:0048539	1	0	8	110	1	21128	PTPRC
GO:BP,	response to steroid hormone	GO:0048545	1	0	342	110	4	21128	A2M,CPN1,WBP2,RWDD1
GO:BP,	embryonic organ morphogenesis	GO:0048562	1	0	302	110	1	21128	RBP4
GO:BP,	digestive tract development	GO:0048565	1	0	133	110	1	21128	IL6ST
GO:BP,	negative regulation of receptor-mediated endocytosis	GO:0048261	1	0	30	110	1	21128	ITGB3
GO:BP,	sebaceous gland development	GO:0048733	1	0	10	110	1	21128	ASH1L
GO:BP,	nicotinamide nucleotide metabolic process	GO:0046496	1	0	84	110	1	21128	VCP
GO:BP,	glycerolipid metabolic process	GO:0046486	1	0	400	110	1	21128	PIK3C3
GO:BP,	regulation of megakaryocyte differentiation	GO:0045652	1	0	37	110	2	21128	PF4,PITHD1
GO:BP,	negative regulation of megakaryocyte differentiation	GO:0045653	1	0	19	110	1	21128	PF4
GO:BP,	positive regulation of megakaryocyte differentiation	GO:0045654	1	0	11	110	1	21128	PITHD1
GO:BP,	regulation of osteoblast differentiation	GO:0045667	1	0	127	110	3	21128	LTF,PTK2,IL6ST
GO:BP,	positive regulation of osteoblast differentiation	GO:0045669	1	0	68	110	2	21128	LTF,IL6ST
GO:BP,	regulation of osteoclast differentiation	GO:0045670	1	0	69	110	1	21128	LTF
GO:BP,	negative regulation of osteoclast differentiation	GO:0045671	1	0	32	110	1	21128	LTF
GO:BP,	regulation of glial cell differentiation	GO:0045685	1	0	74	110	1	21128	IL6ST
GO:BP,	positive regulation of glial cell differentiation	GO:0045687	1	0	43	110	1	21128	IL6ST
GO:BP,	positive regulation of protein catabolic process	GO:0045732	1	0	212	110	3	21128	VCP,C4BPA,C4BPB
GO:BP,	positive regulation of macrophage differentiation	GO:0045651	1	0	16	110	1	21128	PF4
GO:BP,	positive regulation of G protein-coupled receptor signaling pathway	GO:0045745	1	0	27	110	1	21128	ITGB3
GO:BP,	regulation of angiogenesis	GO:0045765	1	0	287	110	4	21128	HRG,ITGB3,PF4,ITGB2
GO:BP,	positive regulation of angiogenesis	GO:0045766	1	0	165	110	2	21128	ITGB3,ITGB2
GO:BP,	positive regulation of ossification	GO:0045778	1	0	54	110	1	21128	LTF
GO:BP,	positive regulation of bone resorption	GO:0045780	1	0	19	110	1	21128	ITGB3
GO:BP,	negative regulation of cell cycle	GO:0045786	1	0	383	110	1	21128	VPS4A
GO:BP,	negative regulation of endocytosis	GO:0045806	1	0	49	110	1	21128	ITGB3
GO:BP,	positive regulation of endocytosis	GO:0045807	1	0	98	110	2	21128	CD36,TSG101
GO:BP,	transcription initiation-coupled chromatin remodeling	GO:0045815	1	0	18	110	1	21128	WBP2
GO:BP,	negative regulation of innate immune response	GO:0045824	1	0	74	110	1	21128	A2M
GO:BP,	positive regulation of isotype switching	GO:0045830	1	0	27	110	1	21128	PTPRC
GO:BP,	positive regulation of Notch signaling pathway	GO:0045747	1	0	46	110	1	21128	IL6ST
GO:BP,	regulation of macrophage differentiation	GO:0045649	1	0	23	110	1	21128	PF4
GO:BP,	positive regulation of myeloid cell differentiation	GO:0045639	1	0	100	110	2	21128	PF4,PITHD1
GO:BP,	negative regulation of myeloid cell differentiation	GO:0045638	1	0	92	110	2	21128	LTF,PF4
GO:BP,	cellular respiration	GO:0045333	1	0	256	110	1	21128	VCP
GO:BP,	MHC class II biosynthetic process	GO:0045342	1	0	20	110	1	21128	PF4
GO:BP,	regulation of MHC class II biosynthetic process	GO:0045346	1	0	19	110	1	21128	PF4
GO:BP,	negative regulation of MHC class II biosynthetic process	GO:0045347	1	0	6	110	1	21128	PF4
GO:BP,	fat cell differentiation	GO:0045444	1	0	237	110	1	21128	TGFB1I1
GO:BP,	myoblast differentiation	GO:0045445	1	0	112	110	1	21128	PLG
GO:BP,	endothelial cell differentiation	GO:0045446	1	0	112	110	1	21128	PECAM1
GO:BP,	bone resorption	GO:0045453	1	0	66	110	1	21128	ITGB3
GO:BP,	response to ethanol	GO:0045471	1	0	127	110	1	21128	S100A8
GO:BP,	mast cell activation	GO:0045576	1	0	69	110	3	21128	S100A12,PTPN6,UNC13D
GO:BP,	regulation of B cell differentiation	GO:0045577	1	0	33	110	1	21128	PTPN6
GO:BP,	regulation of T cell differentiation	GO:0045580	1	0	180	110	1	21128	PTPRC
GO:BP,	positive regulation of T cell differentiation	GO:0045582	1	0	117	110	1	21128	PTPRC
GO:BP,	regulation of gamma-delta T cell differentiation	GO:0045586	1	0	9	110	1	21128	PTPRC
GO:BP,	positive regulation of gamma-delta T cell differentiation	GO:0045588	1	0	7	110	1	21128	PTPRC
GO:BP,	regulation of cell differentiation	GO:0045595	1	0	1567	110	11	21128	LTF,SERPINF2,ITGB3,PTPN6,PF4,PTPRC,PTK2,CD36,PITHD1,TGFB1I1,IL6ST
GO:BP,	negative regulation of cell differentiation	GO:0045596	1	0	674	110	4	21128	LTF,ITGB3,PF4,TGFB1I1
GO:BP,	positive regulation of cell differentiation	GO:0045597	1	0	850	110	9	21128	LTF,SERPINF2,PF4,PTPRC,PTK2,CD36,PITHD1,TGFB1I1,IL6ST
GO:BP,	regulation of fat cell differentiation	GO:0045598	1	0	135	110	1	21128	TGFB1I1
GO:BP,	negative regulation of fat cell differentiation	GO:0045599	1	0	54	110	1	21128	TGFB1I1
GO:BP,	regulation of lymphocyte differentiation	GO:0045619	1	0	211	110	2	21128	PTPN6,PTPRC
GO:BP,	positive regulation of lymphocyte differentiation	GO:0045621	1	0	132	110	1	21128	PTPRC
GO:BP,	regulation of myeloid cell differentiation	GO:0045637	1	0	210	110	3	21128	LTF,PF4,PITHD1
GO:BP,	positive regulation of lipid metabolic process	GO:0045834	1	0	151	110	1	21128	PTK2
GO:BP,	phosphatidylinositol metabolic process	GO:0046488	1	0	161	110	1	21128	PIK3C3
GO:BP,	positive regulation of membrane potential	GO:0045838	1	0	17	110	1	21128	VCP
GO:BP,	positive regulation of protein kinase activity	GO:0045860	1	0	417	110	5	21128	LTF,ITGB3,S100A12,PTPRC,PTK2
GO:BP,	dUMP catabolic process	GO:0046079	1	0	6	110	1	21128	DPYD
GO:BP,	cytidine metabolic process	GO:0046087	1	0	12	110	1	21128	CDA
GO:BP,	thymidine metabolic process	GO:0046104	1	0	5	110	1	21128	DPYD
GO:BP,	nucleobase catabolic process	GO:0046113	1	0	5	110	1	21128	DPYD
GO:BP,	deoxyribonucleoside catabolic process	GO:0046121	1	0	6	110	1	21128	DPYD
GO:BP,	pyrimidine deoxyribonucleoside metabolic process	GO:0046125	1	0	5	110	1	21128	DPYD
GO:BP,	pyrimidine deoxyribonucleoside catabolic process	GO:0046127	1	0	1	110	1	21128	DPYD
GO:BP,	pyrimidine ribonucleoside metabolic process	GO:0046131	1	0	14	110	1	21128	CDA
GO:BP,	pyrimidine ribonucleoside catabolic process	GO:0046133	1	0	14	110	1	21128	CDA
GO:BP,	pyrimidine nucleoside catabolic process	GO:0046135	1	0	16	110	2	21128	CDA,DPYD
GO:BP,	dUMP metabolic process	GO:0046078	1	0	9	110	1	21128	DPYD
GO:BP,	nitric oxide metabolic process	GO:0046209	1	0	78	110	4	21128	HBB,MMP8,ITGB2,CD36
GO:BP,	regulation of JNK cascade	GO:0046328	1	0	143	110	2	21128	SERPINF2,MMP8
GO:BP,	positive regulation of JNK cascade	GO:0046330	1	0	97	110	2	21128	SERPINF2,MMP8
GO:BP,	monosaccharide biosynthetic process	GO:0046364	1	0	91	110	1	21128	RBP4
GO:BP,	deoxyribose phosphate catabolic process	GO:0046386	1	0	28	110	1	21128	DPYD
GO:BP,	ribose phosphate biosynthetic process	GO:0046390	1	0	249	110	2	21128	VCP,CDA
GO:BP,	carboxylic acid biosynthetic process	GO:0046394	1	0	329	110	1	21128	DPYD
GO:BP,	regulation of receptor signaling pathway via JAK-STAT	GO:0046425	1	0	102	110	1	21128	PTPRC
GO:BP,	organophosphate catabolic process	GO:0046434	1	0	164	110	3	21128	VCP,PLBD1,DPYD
GO:BP,	glycerophospholipid biosynthetic process	GO:0046474	1	0	215	110	1	21128	PIK3C3
GO:BP,	heterocycle metabolic process	GO:0046483	1	0	8296	110	25	21128	VCP,LTF,SERPINF2,PDLIM1,S100A12,AZGP1,LIMS1,ENDOD1,S100A8,CDA,PF4,ITGA6,H1-4,S100A9,ITGB2,WBP2,PTPRC,CD36,PITHD1,TGFB1I1,TSG101,RWDD1,DPYD,ZNF578,ASH1L
GO:BP,	phosphocreatine biosynthetic process	GO:0046314	1	0	5	110	1	21128	CKMT2
GO:BP,	dCMP metabolic process	GO:0046063	1	0	6	110	1	21128	DPYD
GO:BP,	UMP catabolic process	GO:0046050	1	0	5	110	1	21128	DPYD
GO:BP,	UMP metabolic process	GO:0046049	1	0	19	110	2	21128	CDA,DPYD
GO:BP,	negative regulation of proteolysis	GO:0045861	1	0	341	110	6	21128	A2M,C4A,LTF,HRG,SERPINF2,CPB2
GO:BP,	positive regulation of proteolysis	GO:0045862	1	0	369	110	4	21128	VCP,S100A8,S100A9,PTK2
GO:BP,	negative regulation of smoothened signaling pathway	GO:0045879	1	0	34	110	1	21128	VCP
GO:BP,	negative regulation of DNA-templated transcription	GO:0045892	1	0	1311	110	4	21128	LIMS1,H1-4,CD36,TSG101
GO:BP,	positive regulation of DNA-templated transcription	GO:0045893	1	0	1703	110	9	21128	SERPINF2,PDLIM1,PF4,ITGA6,WBP2,PITHD1,TGFB1I1,TSG101,ASH1L
GO:BP,	positive regulation of vasoconstriction	GO:0045907	1	0	31	110	3	21128	FGB,FGG,FGA
GO:BP,	negative regulation of DNA recombination	GO:0045910	1	0	44	110	1	21128	H1-4
GO:BP,	positive regulation of DNA recombination	GO:0045911	1	0	71	110	1	21128	PTPRC
GO:BP,	negative regulation of catecholamine metabolic process	GO:0045914	1	0	2	110	1	21128	ITGB2
GO:BP,	negative regulation of growth	GO:0045926	1	0	248	110	3	21128	HRG,RBP4,CDA
GO:BP,	positive regulation of growth	GO:0045927	1	0	261	110	3	21128	S100A8,S100A9,ITSN2
GO:BP,	negative regulation of mitotic cell cycle	GO:0045930	1	0	228	110	1	21128	VPS4A
GO:BP,	negative regulation of nucleobase-containing compound metabolic process	GO:0045934	1	0	1565	110	5	21128	LIMS1,CDA,H1-4,CD36,TSG101
GO:BP,	positive regulation of nucleobase-containing compound metabolic process	GO:0045935	1	0	2051	110	11	21128	VCP,SERPINF2,PDLIM1,PF4,ITGA6,WBP2,PTPRC,PITHD1,TGFB1I1,TSG101,ASH1L
GO:BP,	negative regulation of phosphate metabolic process	GO:0045936	1	0	419	110	5	21128	PTPN6,CDA,PTPA,PTPRC,TSG101
GO:BP,	positive regulation of phosphate metabolic process	GO:0045937	1	0	907	110	11	21128	VCP,LTF,ITGB3,S100A12,PECAM1,ITGA6,PTPA,PTPRC,PTK2,CD36,IL6ST
GO:BP,	positive regulation of transcription by RNA polymerase II	GO:0045944	1	0	1242	110	5	21128	SERPINF2,PF4,ITGA6,WBP2,ASH1L
GO:BP,	negative regulation of complement activation, classical pathway	GO:0045959	1	0	9	110	2	21128	C4BPA,C4BPB
GO:BP,	negative regulation of dopamine metabolic process	GO:0045963	1	0	2	110	1	21128	ITGB2
GO:BP,	negative regulation of nucleotide metabolic process	GO:0045980	1	0	24	110	1	21128	CDA
GO:BP,	positive regulation of nucleotide metabolic process	GO:0045981	1	0	48	110	1	21128	VCP
GO:BP,	ATP metabolic process	GO:0046034	1	0	224	110	1	21128	VCP
GO:BP,	CMP metabolic process	GO:0046035	1	0	8	110	1	21128	DPYD
GO:BP,	regulation of protein kinase activity	GO:0045859	1	0	661	110	7	21128	LTF,ITGB3,S100A12,PTPN6,PTPRC,PTK2,TSG101
GO:BP,	appendage development	GO:0048736	1	0	182	110	1	21128	ITGA6
GO:BP,	cardiac muscle tissue development	GO:0048738	1	0	224	110	1	21128	RBP4
GO:BP,	mesenchymal cell differentiation	GO:0048762	1	0	241	110	3	21128	PTK2,S100A4,TGFB1I1
GO:BP,	regulation of neurotransmitter transport	GO:0051588	1	0	107	110	1	21128	ITGB3
GO:BP,	response to calcium ion	GO:0051592	1	0	149	110	3	21128	FGB,FGG,FGA
GO:BP,	proteolysis involved in protein catabolic process	GO:0051603	1	0	799	110	7	21128	VCP,CANX,PTK2,PITHD1,TGFB1I1,TSG101,VPS4A
GO:BP,	detection of stimulus	GO:0051606	1	0	647	110	2	21128	AZGP1,PTK2
GO:BP,	defense response to virus	GO:0051607	1	0	304	110	2	21128	UNC13D,PTPRC
GO:BP,	serotonin uptake	GO:0051610	1	0	11	110	1	21128	ITGB3
GO:BP,	regulation of serotonin uptake	GO:0051611	1	0	4	110	1	21128	ITGB3
GO:BP,	actin filament network formation	GO:0051639	1	0	11	110	1	21128	LCP1
GO:BP,	organelle localization	GO:0051640	1	0	577	110	4	21128	UNC13D,STX7,TSG101,VPS4A
GO:BP,	cellular localization	GO:0051641	1	0	3588	110	32	21128	FGB,FGG,FGA,LCP1,VCP,ITGB3,LCN2,AZGP1,GP5,GP1BA,LIMS1,CORO1A,S100A8,RBP4,PTPN6,UNC13D,PECAM1,CANX,S100A9,ITGB2,STX7,WBP2,RAB27B,PTPRC,STOM,CD36,RP2,RUFY1,ITSN2,TSG101,PIK3C3,VPS4A
GO:BP,	regulation of neurotransmitter uptake	GO:0051580	1	0	18	110	1	21128	ITGB3
GO:BP,	vesicle localization	GO:0051648	1	0	211	110	2	21128	TSG101,VPS4A
GO:BP,	establishment of vesicle localization	GO:0051650	1	0	194	110	2	21128	TSG101,VPS4A
GO:BP,	establishment of organelle localization	GO:0051656	1	0	443	110	3	21128	UNC13D,TSG101,VPS4A
GO:BP,	membrane raft localization	GO:0051665	1	0	8	110	1	21128	PTPRC
GO:BP,	localization within membrane	GO:0051668	1	0	901	110	5	21128	ITGB2,STX7,PTPRC,STOM,VPS4A
GO:BP,	disruption of membrane integrity in another organism	GO:0051673	1	0	13	110	1	21128	LTF
GO:BP,	biological process involved in interaction with host	GO:0051701	1	0	219	110	4	21128	LTF,ITGB3,TSG101,VPS4A
GO:BP,	biological process involved in intraspecies interaction between organisms	GO:0051703	1	0	56	110	1	21128	LTF
GO:BP,	regulation of cell cycle	GO:0051726	1	0	1124	110	5	21128	PTPN6,PTPRC,TSG101,PIK3C3,VPS4A
GO:BP,	actin crosslink formation	GO:0051764	1	0	14	110	1	21128	LCP1
GO:BP,	positive regulation of cell division	GO:0051781	1	0	93	110	1	21128	PPBP
GO:BP,	establishment of localization in cell	GO:0051649	1	0	2340	110	15	21128	LCP1,VCP,ITGB3,CORO1A,UNC13D,CANX,ITGB2,STX7,RAB27B,STOM,CD36,ITSN2,TSG101,PIK3C3,VPS4A
GO:BP,	histone H3-K4 methylation	GO:0051568	1	0	73	110	2	21128	H1-4,ASH1L
GO:BP,	RNA phosphodiester bond hydrolysis	GO:0090501	1	0	161	110	1	21128	AZGP1
GO:BP,	positive regulation of cytoskeleton organization	GO:0051495	1	0	194	110	2	21128	SERPINF2,GRB2
GO:BP,	negative regulation of lymphocyte activation	GO:0051250	1	0	162	110	2	21128	FGL1,PTPN6
GO:BP,	regulation of RNA metabolic process	GO:0051252	1	0	3783	110	19	21128	LTF,SERPINF2,PDLIM1,S100A12,LIMS1,S100A8,PF4,ITGA6,H1-4,S100A9,ITGB2,WBP2,CD36,PITHD1,TGFB1I1,TSG101,RWDD1,ZNF578,ASH1L
GO:BP,	negative regulation of RNA metabolic process	GO:0051253	1	0	1438	110	4	21128	LIMS1,H1-4,CD36,TSG101
GO:BP,	positive regulation of RNA metabolic process	GO:0051254	1	0	1843	110	9	21128	SERPINF2,PDLIM1,PF4,ITGA6,WBP2,PITHD1,TGFB1I1,TSG101,ASH1L
GO:BP,	protein polymerization	GO:0051258	1	0	284	110	5	21128	FGB,FGG,FGA,CORO1A,GRB2
GO:BP,	protein depolymerization	GO:0051261	1	0	123	110	1	21128	VPS4A
GO:BP,	chromosome organization	GO:0051276	1	0	635	110	2	21128	H1-4,VPS4A
GO:BP,	regulation of release of sequestered calcium ion into cytosol	GO:0051279	1	0	83	110	3	21128	ITGB3,CORO1A,PTPN6
GO:BP,	cell division	GO:0051301	1	0	660	110	4	21128	PPBP,TSG101,PIK3C3,VPS4A
GO:BP,	regulation of cell division	GO:0051302	1	0	189	110	3	21128	PPBP,PIK3C3,VPS4A
GO:BP,	establishment of chromosome localization	GO:0051303	1	0	85	110	1	21128	VPS4A
GO:BP,	metaphase plate congression	GO:0051310	1	0	73	110	1	21128	VPS4A
GO:BP,	regulation of transferase activity	GO:0051338	1	0	908	110	7	21128	LTF,ITGB3,S100A12,PTPN6,PTPRC,PTK2,TSG101
GO:BP,	negative regulation of hydrolase activity	GO:0051346	1	0	356	110	6	21128	A2M,C4A,LTF,HRG,SERPINF2,PTPA
GO:BP,	positive regulation of transferase activity	GO:0051347	1	0	584	110	5	21128	LTF,ITGB3,S100A12,PTPRC,PTK2
GO:BP,	negative regulation of transferase activity	GO:0051348	1	0	271	110	3	21128	PTPN6,PTPRC,TSG101
GO:BP,	response to glucocorticoid	GO:0051384	1	0	145	110	2	21128	A2M,CPN1
GO:BP,	neuron apoptotic process	GO:0051402	1	0	254	110	2	21128	CORO1A,IL6ST
GO:BP,	stress-activated MAPK cascade	GO:0051403	1	0	239	110	2	21128	SERPINF2,MMP8
GO:BP,	intracellular pH reduction	GO:0051452	1	0	53	110	1	21128	CA2
GO:BP,	regulation of intracellular pH	GO:0051453	1	0	85	110	1	21128	CA2
GO:BP,	regulation of stress fiber assembly	GO:0051492	1	0	89	110	1	21128	SERPINF2
GO:BP,	negative regulation of cytoskeleton organization	GO:0051494	1	0	165	110	1	21128	CORO1A
GO:BP,	negative regulation of cell division	GO:0051782	1	0	17	110	1	21128	VPS4A
GO:BP,	negative regulation of protein metabolic process	GO:0051248	1	0	1031	110	11	21128	A2M,C4A,LTF,HRG,SERPINF2,ITGB3,PTPN6,CPB2,PTPA,PTPRC,TSG101
GO:BP,	response to misfolded protein	GO:0051788	1	0	25	110	1	21128	VCP
GO:BP,	regulation of mitochondrial membrane potential	GO:0051881	1	0	71	110	1	21128	VCP
GO:BP,	lipoprotein particle mediated signaling	GO:0055095	1	0	3	110	1	21128	CD36
GO:BP,	low-density lipoprotein particle mediated signaling	GO:0055096	1	0	3	110	1	21128	CD36
GO:BP,	digestive system development	GO:0055123	1	0	145	110	1	21128	IL6ST
GO:BP,	cardiac muscle cell proliferation	GO:0060038	1	0	50	110	1	21128	RBP4
GO:BP,	retina development in camera-type eye	GO:0060041	1	0	161	110	1	21128	RBP4
GO:BP,	retina morphogenesis in camera-type eye	GO:0060042	1	0	64	110	1	21128	RBP4
GO:BP,	regulation of cardiac muscle cell proliferation	GO:0060043	1	0	38	110	1	21128	RBP4
GO:BP,	negative regulation of cardiac muscle cell proliferation	GO:0060044	1	0	12	110	1	21128	RBP4
GO:BP,	angiogenesis involved in wound healing	GO:0060055	1	0	28	110	1	21128	ITGB3
GO:BP,	embryonic retina morphogenesis in camera-type eye	GO:0060059	1	0	6	110	1	21128	RBP4
GO:BP,	response to lipoprotein particle	GO:0055094	1	0	29	110	2	21128	ITGB2,CD36
GO:BP,	uterus development	GO:0060065	1	0	24	110	2	21128	RBP4,ASH1L
GO:BP,	canonical Wnt signaling pathway	GO:0060070	1	0	299	110	1	21128	VCP
GO:BP,	regulation of phagocytosis, engulfment	GO:0060099	1	0	16	110	1	21128	CD36
GO:BP,	positive regulation of phagocytosis, engulfment	GO:0060100	1	0	14	110	1	21128	CD36
GO:BP,	maternal process involved in female pregnancy	GO:0060135	1	0	60	110	1	21128	ASH1L
GO:BP,	urinary bladder development	GO:0060157	1	0	4	110	1	21128	RBP4
GO:BP,	limb development	GO:0060173	1	0	182	110	1	21128	ITGA6
GO:BP,	regulation of macromolecule metabolic process	GO:0060255	1	0	6851	110	35	21128	A2M,C4A,VCP,C4BPA,LTF,HRG,SERPINF2,ITGB3,PDLIM1,S100A12,LIMS1,S100A8,RBP4,PTPN6,CPB2,MMP8,PECAM1,PF4,ITGA6,H1-4,PTPA,S100A9,ITGB2,WBP2,PTPRC,PTK2,CD36,C4BPB,PITHD1,TGFB1I1,IL6ST,TSG101,RWDD1,ZNF578,ASH1L
GO:BP,	cilium assembly	GO:0060271	1	0	370	110	2	21128	RP2,ASAP1
GO:BP,	regulation of cell development	GO:0060284	1	0	830	110	6	21128	LTF,PTPN6,PF4,PTPRC,PITHD1,IL6ST
GO:BP,	cilium-dependent cell motility	GO:0060285	1	0	161	110	1	21128	ASH1L
GO:BP,	vagina development	GO:0060068	1	0	10	110	1	21128	RBP4
GO:BP,	sterol homeostasis	GO:0055092	1	0	87	110	1	21128	APOM
GO:BP,	lipid homeostasis	GO:0055088	1	0	159	110	1	21128	APOM
GO:BP,	nucleobase-containing small molecule metabolic process	GO:0055086	1	0	700	110	3	21128	VCP,CDA,DPYD
GO:BP,	regulation of focal adhesion assembly	GO:0051893	1	0	64	110	3	21128	HRG,LIMS1,PTK2
GO:BP,	positive regulation of focal adhesion assembly	GO:0051894	1	0	26	110	2	21128	HRG,LIMS1
GO:BP,	regulation of protein kinase B signaling	GO:0051896	1	0	168	110	1	21128	PTK2
GO:BP,	positive regulation of protein kinase B signaling	GO:0051897	1	0	114	110	1	21128	PTK2
GO:BP,	positive regulation of fibrinolysis	GO:0051919	1	0	4	110	1	21128	PLG
GO:BP,	regulation of calcium ion transport	GO:0051924	1	0	264	110	3	21128	ITGB3,CORO1A,PTPN6
GO:BP,	synaptic transmission, GABAergic	GO:0051932	1	0	58	110	1	21128	CA2
GO:BP,	regulation of nervous system development	GO:0051960	1	0	457	110	1	21128	IL6ST
GO:BP,	positive regulation of nervous system development	GO:0051962	1	0	283	110	1	21128	IL6ST
GO:BP,	modification by symbiont of host cell membrane	GO:0052025	1	0	13	110	1	21128	LTF
GO:BP,	modification by symbiont of host cellular component	GO:0052043	1	0	13	110	1	21128	LTF
GO:BP,	modification by symbiont of host structure	GO:0052111	1	0	13	110	1	21128	LTF
GO:BP,	regulation of peptidase activity	GO:0052547	1	0	444	110	8	21128	A2M,C4A,VCP,LTF,HRG,SERPINF2,S100A8,S100A9
GO:BP,	regulation of endopeptidase activity	GO:0052548	1	0	415	110	8	21128	A2M,C4A,VCP,LTF,HRG,SERPINF2,S100A8,S100A9
GO:BP,	cardiac muscle tissue growth	GO:0055017	1	0	75	110	1	21128	RBP4
GO:BP,	regulation of cardiac muscle tissue growth	GO:0055021	1	0	54	110	1	21128	RBP4
GO:BP,	negative regulation of cardiac muscle tissue growth	GO:0055022	1	0	23	110	1	21128	RBP4
GO:BP,	zinc ion homeostasis	GO:0055069	1	0	41	110	2	21128	S100A8,S100A9
GO:BP,	iron ion homeostasis	GO:0055072	1	0	88	110	2	21128	LTF,LCN2
GO:BP,	calcium ion homeostasis	GO:0055074	1	0	315	110	6	21128	ITGB3,GP5,GP1BA,CORO1A,PTPN6,PTPRC
GO:BP,	transition metal ion homeostasis	GO:0055076	1	0	142	110	4	21128	LTF,LCN2,S100A8,S100A9
GO:BP,	cellular chemical homeostasis	GO:0055082	1	0	689	110	11	21128	ITGB3,CA2,LCN2,GP5,GP1BA,CORO1A,S100A8,PTPN6,CPB2,S100A9,PTPRC
GO:BP,	transmembrane transport	GO:0055085	1	0	1555	110	11	21128	ITGB3,CA2,AZGP1,GP5,GP1BA,PPBP,CORO1A,PTPN6,PTPRC,STOM,CD36
GO:BP,	modulation by host of symbiont process	GO:0051851	1	0	81	110	3	21128	LTF,STOM,PIK3C3
GO:BP,	positive regulation of protein metabolic process	GO:0051247	1	0	1499	110	15	21128	VCP,C4BPA,LTF,ITGB3,S100A12,S100A8,PECAM1,PTPA,S100A9,WBP2,PTPRC,PTK2,CD36,C4BPB,IL6ST
GO:BP,	regulation of protein metabolic process	GO:0051246	1	0	2560	110	24	21128	A2M,C4A,VCP,C4BPA,LTF,HRG,SERPINF2,ITGB3,S100A12,S100A8,PTPN6,CPB2,PECAM1,PTPA,S100A9,ITGB2,WBP2,PTPRC,PTK2,CD36,C4BPB,PITHD1,IL6ST,TSG101
GO:BP,	spindle disassembly	GO:0051230	1	0	2	110	1	21128	VCP
GO:BP,	regulation of inflammatory response	GO:0050727	1	0	371	110	7	21128	S100A12,S100A8,MMP8,S100A9,PTPRC,IL6ST,ASH1L
GO:BP,	negative regulation of inflammatory response	GO:0050728	1	0	148	110	2	21128	PTPRC,ASH1L
GO:BP,	positive regulation of inflammatory response	GO:0050729	1	0	145	110	5	21128	S100A12,S100A8,MMP8,S100A9,IL6ST
GO:BP,	positive regulation of peptidyl-tyrosine phosphorylation	GO:0050731	1	0	191	110	5	21128	ITGB3,PECAM1,PTPRC,CD36,IL6ST
GO:BP,	negative regulation of peptidyl-tyrosine phosphorylation	GO:0050732	1	0	53	110	3	21128	PTPN6,PTPRC,TSG101
GO:BP,	regulation of lipoprotein metabolic process	GO:0050746	1	0	18	110	1	21128	ITGB3
GO:BP,	negative regulation of lipoprotein metabolic process	GO:0050748	1	0	5	110	1	21128	ITGB3
GO:BP,	regulation of phagocytosis	GO:0050764	1	0	102	110	4	21128	C4A,PTPRC,CD36,COLEC11
GO:BP,	positive regulation of phagocytosis	GO:0050766	1	0	73	110	4	21128	C4A,PTPRC,CD36,COLEC11
GO:BP,	regulation of neurogenesis	GO:0050767	1	0	375	110	1	21128	IL6ST
GO:BP,	positive regulation of protein secretion	GO:0050714	1	0	131	110	4	21128	FGB,FGG,FGA,RBP4
GO:BP,	positive regulation of neurogenesis	GO:0050769	1	0	233	110	1	21128	IL6ST
GO:BP,	regulation of developmental process	GO:0050793	1	0	2474	110	17	21128	LTF,HRG,SERPINF2,ITGB3,CORO1A,RBP4,PTPN6,PF4,ITGB2,PTPRC,PTK2,CD36,PITHD1,TGFB1I1,IL6ST,ITSN2,ASAP1
GO:BP,	regulation of insulin secretion	GO:0050796	1	0	155	110	1	21128	RBP4
GO:BP,	regulation of synapse structure or activity	GO:0050803	1	0	220	110	1	21128	VCP
GO:BP,	modulation of chemical synaptic transmission	GO:0050804	1	0	455	110	1	21128	CA2
GO:BP,	positive regulation of synaptic transmission	GO:0050806	1	0	173	110	1	21128	CA2
GO:BP,	regulation of synapse organization	GO:0050807	1	0	214	110	1	21128	VCP
GO:BP,	synapse organization	GO:0050808	1	0	438	110	1	21128	VCP
GO:BP,	defense response to Gram-negative bacterium	GO:0050829	1	0	91	110	4	21128	IGHM,LTF,SELP,LYZ
GO:BP,	defense response to Gram-positive bacterium	GO:0050830	1	0	120	110	2	21128	LYZ,CD36
GO:BP,	progesterone receptor signaling pathway	GO:0050847	1	0	9	110	1	21128	WBP2
GO:BP,	regulation of viral process	GO:0050792	1	0	162	110	4	21128	LTF,STOM,TSG101,VPS4A
GO:BP,	regulation of protein secretion	GO:0050708	1	0	251	110	5	21128	FGB,FGG,FGA,RBP4,PIK3C3
GO:BP,	negative regulation of epithelial cell proliferation	GO:0050680	1	0	140	110	1	21128	CPB2
GO:BP,	positive regulation of epithelial cell proliferation	GO:0050679	1	0	211	110	1	21128	ITGB3
GO:BP,	tissue remodeling	GO:0048771	1	0	168	110	3	21128	PLG,HRG,ITGB3
GO:BP,	animal organ maturation	GO:0048799	1	0	33	110	1	21128	LTF
GO:BP,	genitalia development	GO:0048806	1	0	46	110	1	21128	RBP4
GO:BP,	female genitalia morphogenesis	GO:0048807	1	0	3	110	1	21128	RBP4
GO:BP,	neuron projection morphogenesis	GO:0048812	1	0	635	110	2	21128	PTK2,ITSN2
GO:BP,	anatomical structure development	GO:0048856	1	0	5861	110	41	21128	A2M,FGG,PLG,LCP1,LTF,HRG,SERPINF2,ITGB3,ITGA2B,ARHGDIB,PDLIM1,CA2,FGL1,GP5,GP1BA,CORO1A,S100A8,RBP4,PTPN6,CPB2,MANF,MMP8,UNC13D,PECAM1,PF4,ITGA6,GRB2,S100A9,ITGB2,PTPRC,PTK2,S100A4,CD36,PITHD1,TGFB1I1,IL6ST,ITSN2,TSG101,ASAP1,VPS4A,ASH1L
GO:BP,	cell projection morphogenesis	GO:0048858	1	0	656	110	2	21128	PTK2,ITSN2
GO:BP,	leukemia inhibitory factor signaling pathway	GO:0048861	1	0	9	110	1	21128	IL6ST
GO:BP,	stem cell differentiation	GO:0048863	1	0	248	110	2	21128	A2M,PTPRC
GO:BP,	stem cell development	GO:0048864	1	0	89	110	1	21128	PTPRC
GO:BP,	cellular developmental process	GO:0048869	1	0	4312	110	28	21128	A2M,FGG,PLG,LTF,SERPINF2,ITGB3,GP5,GP1BA,S100A8,PTPN6,MANF,MMP8,PECAM1,PF4,ITGA6,GRB2,S100A9,ITGB2,PTPRC,PTK2,S100A4,CD36,PITHD1,TGFB1I1,IL6ST,ITSN2,TSG101,ASAP1
GO:BP,	multicellular organismal homeostasis	GO:0048871	1	0	754	110	9	21128	LTF,ITGB3,LCN2,AZGP1,CORO1A,RBP4,PECAM1,LYZ,CD36
GO:BP,	homeostasis of number of cells	GO:0048872	1	0	300	110	1	21128	CORO1A
GO:BP,	homeostasis of number of cells within a tissue	GO:0048873	1	0	31	110	1	21128	CORO1A
GO:BP,	chemical homeostasis	GO:0048878	1	0	1014	110	14	21128	LTF,ITGB3,CA2,LCN2,GP5,GP1BA,CORO1A,S100A8,RBP4,PTPN6,CPB2,APOM,S100A9,PTPRC
GO:BP,	sensory system development	GO:0048880	1	0	408	110	1	21128	RBP4
GO:BP,	chromosome localization	GO:0050000	1	0	92	110	1	21128	VPS4A
GO:BP,	chondroitin sulfate proteoglycan metabolic process	GO:0050654	1	0	38	110	1	21128	GUSB
GO:BP,	regulation of lymphocyte proliferation	GO:0050670	1	0	239	110	4	21128	CORO1A,PTPN6,PTPRC,IL6ST
GO:BP,	positive regulation of lymphocyte proliferation	GO:0050671	1	0	145	110	3	21128	CORO1A,PTPRC,IL6ST
GO:BP,	negative regulation of lymphocyte proliferation	GO:0050672	1	0	88	110	1	21128	PTPN6
GO:BP,	epithelial cell proliferation	GO:0050673	1	0	443	110	3	21128	ITGB3,FGL1,CPB2
GO:BP,	regulation of epithelial cell proliferation	GO:0050678	1	0	373	110	2	21128	ITGB3,CPB2
GO:BP,	T cell receptor signaling pathway	GO:0050852	1	0	132	110	2	21128	PTPN6,PTPRC
GO:BP,	regulation of antigen receptor-mediated signaling pathway	GO:0050854	1	0	64	110	2	21128	PTPN6,PTPRC
GO:BP,	regulation of T cell receptor signaling pathway	GO:0050856	1	0	45	110	1	21128	PTPN6
GO:BP,	positive regulation of antigen receptor-mediated signaling pathway	GO:0050857	1	0	24	110	1	21128	PTPRC
GO:BP,	positive regulation of DNA metabolic process	GO:0051054	1	0	299	110	1	21128	PTPRC
GO:BP,	regulation of small GTPase mediated signal transduction	GO:0051056	1	0	314	110	1	21128	ARHGDIB
GO:BP,	regulation of DNA-binding transcription factor activity	GO:0051090	1	0	434	110	7	21128	LTF,S100A12,S100A8,S100A9,ITGB2,CD36,RWDD1
GO:BP,	negative regulation of developmental process	GO:0051093	1	0	919	110	7	21128	LTF,HRG,ITGB3,RBP4,PF4,TGFB1I1,ASAP1
GO:BP,	positive regulation of developmental process	GO:0051094	1	0	1311	110	12	21128	LTF,SERPINF2,ITGB3,PF4,ITGB2,PTPRC,PTK2,CD36,PITHD1,TGFB1I1,IL6ST,ITSN2
GO:BP,	regulation of binding	GO:0051098	1	0	372	110	3	21128	CFHR1,MMP8,CFHR2
GO:BP,	positive regulation of binding	GO:0051099	1	0	179	110	1	21128	MMP8
GO:BP,	negative regulation of binding	GO:0051100	1	0	162	110	2	21128	CFHR1,CFHR2
GO:BP,	regulation of DNA binding	GO:0051101	1	0	121	110	1	21128	MMP8
GO:BP,	regulation of actin nucleation	GO:0051125	1	0	41	110	1	21128	CORO1A
GO:BP,	negative regulation of actin nucleation	GO:0051126	1	0	10	110	1	21128	CORO1A
GO:BP,	regulation of cellular component organization	GO:0051128	1	0	2365	110	23	21128	LCP1,VCP,HRG,SERPINF2,ITGB3,SELP,ARHGDIB,LIMS1,CORO1A,S100A8,CPB2,CDA,ITGA6,GRB2,IQGAP2,APOM,S100A9,PTK2,CD36,RUFY1,ITSN2,TSG101,ASAP1
GO:BP,	negative regulation of cellular component organization	GO:0051129	1	0	702	110	4	21128	HRG,ITGB3,CORO1A,APOM
GO:BP,	positive regulation of cellular component organization	GO:0051130	1	0	1056	110	12	21128	LCP1,VCP,HRG,SERPINF2,LIMS1,CPB2,ITGA6,GRB2,S100A9,CD36,TSG101,ASAP1
GO:BP,	nuclear transport	GO:0051169	1	0	330	110	1	21128	CD36
GO:BP,	import into nucleus	GO:0051170	1	0	170	110	1	21128	CD36
GO:BP,	regulation of nitrogen compound metabolic process	GO:0051171	1	0	5724	110	36	21128	A2M,C4A,VCP,C4BPA,HBB,LTF,HRG,SERPINF2,ITGB3,PDLIM1,S100A12,LIMS1,S100A8,PTPN6,CPB2,MMP8,CDA,PECAM1,PF4,ITGA6,H1-4,PTPA,S100A9,ITGB2,WBP2,PTPRC,PTK2,CD36,C4BPB,PITHD1,TGFB1I1,IL6ST,TSG101,RWDD1,ZNF578,ASH1L
GO:BP,	negative regulation of nitrogen compound metabolic process	GO:0051172	1	0	2401	110	16	21128	A2M,C4A,LTF,HRG,SERPINF2,ITGB3,LIMS1,PTPN6,CPB2,CDA,H1-4,PTPA,ITGB2,PTPRC,CD36,TSG101
GO:BP,	positive regulation of nitrogen compound metabolic process	GO:0051173	1	0	3154	110	26	21128	VCP,C4BPA,HBB,LTF,SERPINF2,ITGB3,PDLIM1,S100A12,S100A8,MMP8,PECAM1,PF4,ITGA6,PTPA,S100A9,ITGB2,WBP2,PTPRC,PTK2,CD36,C4BPB,PITHD1,TGFB1I1,IL6ST,TSG101,ASH1L
GO:BP,	regulation of phosphorus metabolic process	GO:0051174	1	0	1401	110	17	21128	VCP,LTF,HRG,ITGB3,S100A12,PTPN6,CDA,PECAM1,ITGA6,PTPA,ITGB2,PTPRC,PTK2,CD36,IL6ST,PPP1R14A,TSG101
GO:BP,	positive regulation of protein transport	GO:0051222	1	0	299	110	7	21128	FGB,FGG,FGA,RBP4,ITGB2,STOM,TSG101
GO:BP,	negative regulation of protein transport	GO:0051224	1	0	118	110	1	21128	CD36
GO:BP,	mitotic spindle disassembly	GO:0051228	1	0	2	110	1	21128	VCP
GO:BP,	negative regulation of DNA metabolic process	GO:0051053	1	0	147	110	1	21128	H1-4
GO:BP,	regulation of blood vessel remodeling	GO:0060312	1	0	6	110	1	21128	HRG
GO:BP,	regulation of DNA metabolic process	GO:0051052	1	0	535	110	2	21128	H1-4,PTPRC
GO:BP,	actin filament bundle assembly	GO:0051017	1	0	158	110	3	21128	LCP1,SERPINF2,PDLIM1
GO:BP,	negative regulation of antigen receptor-mediated signaling pathway	GO:0050858	1	0	33	110	1	21128	PTPN6
GO:BP,	negative regulation of T cell receptor signaling pathway	GO:0050860	1	0	26	110	1	21128	PTPN6
GO:BP,	regulation of T cell activation	GO:0050863	1	0	373	110	5	21128	FGL1,CORO1A,PTPN6,PTPRC,IL6ST
GO:BP,	negative regulation of cell activation	GO:0050866	1	0	216	110	4	21128	FGG,FGL1,PTPN6,PTPRC
GO:BP,	negative regulation of T cell activation	GO:0050868	1	0	127	110	2	21128	FGL1,PTPN6
GO:BP,	positive regulation of T cell activation	GO:0050870	1	0	247	110	4	21128	CORO1A,PTPN6,PTPRC,IL6ST
GO:BP,	nervous system process	GO:0050877	1	0	1518	110	4	21128	AZGP1,RBP4,CD36,RP2
GO:BP,	endocrine process	GO:0050886	1	0	93	110	1	21128	SERPINF2
GO:BP,	intestinal absorption	GO:0050892	1	0	42	110	1	21128	CD36
GO:BP,	leukocyte tethering or rolling	GO:0050901	1	0	34	110	2	21128	SELP,GP1BA
GO:BP,	diapedesis	GO:0050904	1	0	7	110	1	21128	PECAM1
GO:BP,	detection of stimulus involved in sensory perception	GO:0050906	1	0	514	110	1	21128	AZGP1
GO:BP,	detection of chemical stimulus involved in sensory perception	GO:0050907	1	0	445	110	1	21128	AZGP1
GO:BP,	sensory perception of taste	GO:0050909	1	0	69	110	2	21128	AZGP1,CD36
GO:BP,	detection of chemical stimulus involved in sensory perception of taste	GO:0050912	1	0	43	110	1	21128	AZGP1
GO:BP,	sensory perception of bitter taste	GO:0050913	1	0	42	110	1	21128	AZGP1
GO:BP,	positive chemotaxis	GO:0050918	1	0	64	110	1	21128	CORO1A
GO:BP,	negative chemotaxis	GO:0050919	1	0	48	110	1	21128	ITGB3
GO:BP,	regulation of chemotaxis	GO:0050920	1	0	224	110	2	21128	HRG,PTK2
GO:BP,	positive regulation of chemotaxis	GO:0050921	1	0	144	110	1	21128	PTK2
GO:BP,	negative regulation of chemotaxis	GO:0050922	1	0	62	110	1	21128	HRG
GO:BP,	sensory perception of light stimulus	GO:0050953	1	0	224	110	2	21128	RBP4,RP2
GO:BP,	detection of mechanical stimulus	GO:0050982	1	0	53	110	1	21128	PTK2
GO:BP,	negative regulation of transport	GO:0051051	1	0	431	110	3	21128	ITGB3,CORO1A,CD36
GO:BP,	sensory organ morphogenesis	GO:0090596	1	0	284	110	1	21128	RBP4
GO:BP,	acetylcholine receptor signaling pathway	GO:0095500	1	0	29	110	1	21128	RGS10
GO:BP,	ubiquitin-independent protein catabolic process via the multivesicular body sorting pathway	GO:0090611	1	0	5	110	1	21128	VPS4A
GO:BP,	negative regulation of neuron death	GO:1901215	1	0	216	110	2	21128	CORO1A,IL6ST
GO:BP,	positive regulation of neuron death	GO:1901216	1	0	93	110	1	21128	ITGB2
GO:BP,	regulation of NIK/NF-kappaB signaling	GO:1901222	1	0	100	110	2	21128	LIMS1,MMP8
GO:BP,	positive regulation of NIK/NF-kappaB signaling	GO:1901224	1	0	66	110	2	21128	LIMS1,MMP8
GO:BP,	nucleoside phosphate catabolic process	GO:1901292	1	0	87	110	2	21128	VCP,DPYD
GO:BP,	nucleoside phosphate biosynthetic process	GO:1901293	1	0	321	110	2	21128	VCP,CDA
GO:BP,	regulation of vasculature development	GO:1901342	1	0	291	110	4	21128	HRG,ITGB3,PF4,ITGB2
GO:BP,	negative regulation of vasculature development	GO:1901343	1	0	104	110	2	21128	HRG,PF4
GO:BP,	organic cyclic compound metabolic process	GO:1901360	1	0	8584	110	25	21128	VCP,LTF,SERPINF2,PDLIM1,S100A12,AZGP1,LIMS1,ENDOD1,S100A8,CDA,PF4,ITGA6,H1-4,S100A9,ITGB2,WBP2,PTPRC,CD36,PITHD1,TGFB1I1,TSG101,RWDD1,DPYD,ZNF578,ASH1L
GO:BP,	organic cyclic compound catabolic process	GO:1901361	1	0	509	110	3	21128	VCP,CDA,DPYD
GO:BP,	organic cyclic compound biosynthetic process	GO:1901362	1	0	4307	110	21	21128	VCP,LTF,SERPINF2,PDLIM1,S100A12,LIMS1,S100A8,CDA,PF4,ITGA6,H1-4,S100A9,ITGB2,WBP2,CD36,PITHD1,TGFB1I1,TSG101,RWDD1,ZNF578,ASH1L
GO:BP,	organonitrogen compound metabolic process	GO:1901564	1	0	6538	110	49	21128	A2M,FGB,FGG,FGA,C4A,PLG,VCP,C4BPA,LTF,HRG,SERPINF2,ITGB3,F13B,S100A12,GP5,GP1BA,MASP1,S100A8,PTPN6,CPB2,MMP8,MLEC,CDA,PECAM1,CANX,H1-4,PTPA,CPN1,APOM,S100A9,ITGB2,WBP2,PTPRC,PTK2,CD36,COLEC11,C4BPB,PITHD1,TGFB1I1,IL6ST,GUSB,TSG101,MASP2,RWDD1,DPYD,PIK3C3,VPS4A,CKMT2,ASH1L
GO:BP,	organonitrogen compound catabolic process	GO:1901565	1	0	1386	110	14	21128	VCP,C4BPA,CPB2,CDA,CANX,CPN1,PTK2,C4BPB,PITHD1,TGFB1I1,GUSB,TSG101,DPYD,VPS4A
GO:BP,	organonitrogen compound biosynthetic process	GO:1901566	1	0	1805	110	7	21128	VCP,MLEC,CDA,RWDD1,DPYD,PIK3C3,CKMT2
GO:BP,	organic substance catabolic process	GO:1901575	1	0	2148	110	15	21128	VCP,C4BPA,CPB2,CDA,CANX,CPN1,PTK2,PLBD1,C4BPB,PITHD1,TGFB1I1,GUSB,TSG101,DPYD,VPS4A
GO:BP,	organic substance biosynthetic process	GO:1901576	1	0	5886	110	26	21128	VCP,LTF,SERPINF2,PDLIM1,S100A12,LIMS1,S100A8,RBP4,MLEC,CDA,PF4,ITGA6,H1-4,S100A9,ITGB2,WBP2,CD36,PITHD1,TGFB1I1,TSG101,RWDD1,DPYD,PIK3C3,CKMT2,ZNF578,ASH1L
GO:BP,	regulation of acid-sensing ion channel activity	GO:1901585	1	0	1	110	1	21128	STOM
GO:BP,	organic hydroxy compound metabolic process	GO:1901615	1	0	561	110	2	21128	RBP4,ITGB2
GO:BP,	response to peptide	GO:1901652	1	0	497	110	5	21128	ITGB3,CA2,GRB2,PTK2,CD36
GO:BP,	cellular response to peptide	GO:1901653	1	0	363	110	5	21128	ITGB3,CA2,GRB2,PTK2,CD36
GO:BP,	response to ketone	GO:1901654	1	0	211	110	4	21128	A2M,CDA,WBP2,RWDD1
GO:BP,	cellular response to ketone	GO:1901655	1	0	111	110	1	21128	RWDD1
GO:BP,	glycosyl compound metabolic process	GO:1901657	1	0	80	110	3	21128	CDA,GUSB,DPYD
GO:BP,	regulation of neuron death	GO:1901214	1	0	324	110	3	21128	CORO1A,ITGB2,IL6ST
GO:BP,	negative regulation of ERBB signaling pathway	GO:1901185	1	0	32	110	1	21128	TSG101
GO:BP,	regulation of ERBB signaling pathway	GO:1901184	1	0	79	110	1	21128	TSG101
GO:BP,	negative regulation of trophoblast cell migration	GO:1901164	1	0	6	110	1	21128	ARHGDIB
GO:BP,	positive regulation of bone mineralization involved in bone maturation	GO:1900159	1	0	3	110	1	21128	LTF
GO:BP,	regulation of protein localization to nucleus	GO:1900180	1	0	138	110	1	21128	CD36
GO:BP,	negative regulation of protein localization to nucleus	GO:1900181	1	0	36	110	1	21128	CD36
GO:BP,	regulation of single-species biofilm formation	GO:1900190	1	0	2	110	1	21128	LTF
GO:BP,	negative regulation of single-species biofilm formation	GO:1900191	1	0	2	110	1	21128	LTF
GO:BP,	regulation of NLRP3 inflammasome complex assembly	GO:1900225	1	0	20	110	1	21128	CD36
GO:BP,	positive regulation of NLRP3 inflammasome complex assembly	GO:1900227	1	0	12	110	1	21128	CD36
GO:BP,	regulation of single-species biofilm formation in or on host organism	GO:1900228	1	0	2	110	1	21128	LTF
GO:BP,	negative regulation of single-species biofilm formation in or on host organism	GO:1900229	1	0	2	110	1	21128	LTF
GO:BP,	regulation of purine nucleotide biosynthetic process	GO:1900371	1	0	42	110	1	21128	VCP
GO:BP,	positive regulation of purine nucleotide biosynthetic process	GO:1900373	1	0	26	110	1	21128	VCP
GO:BP,	glycosyl compound catabolic process	GO:1901658	1	0	33	110	3	21128	CDA,GUSB,DPYD
GO:BP,	regulation of cellular response to oxidative stress	GO:1900407	1	0	82	110	1	21128	CD36
GO:BP,	positive regulation of purine nucleotide metabolic process	GO:1900544	1	0	48	110	1	21128	VCP
GO:BP,	regulation of adenylate cyclase-inhibiting opioid receptor signaling pathway	GO:1900729	1	0	1	110	1	21128	ITGB3
GO:BP,	positive regulation of adenylate cyclase-inhibiting opioid receptor signaling pathway	GO:1900731	1	0	1	110	1	21128	ITGB3
GO:BP,	regulation of vascular endothelial growth factor signaling pathway	GO:1900746	1	0	22	110	1	21128	HRG
GO:BP,	negative regulation of vascular endothelial growth factor signaling pathway	GO:1900747	1	0	11	110	1	21128	HRG
GO:BP,	regulation of response to reactive oxygen species	GO:1901031	1	0	33	110	1	21128	CD36
GO:BP,	negative regulation of signal transduction in absence of ligand	GO:1901099	1	0	36	110	1	21128	PF4
GO:BP,	carbohydrate derivative metabolic process	GO:1901135	1	0	1125	110	5	21128	VCP,MLEC,CDA,GUSB,DPYD
GO:BP,	carbohydrate derivative catabolic process	GO:1901136	1	0	173	110	3	21128	CDA,GUSB,DPYD
GO:BP,	carbohydrate derivative biosynthetic process	GO:1901137	1	0	676	110	3	21128	VCP,MLEC,CDA
GO:BP,	regulation of trophoblast cell migration	GO:1901163	1	0	15	110	2	21128	ITGB3,ARHGDIB
GO:BP,	regulation of purine nucleotide metabolic process	GO:1900542	1	0	98	110	1	21128	VCP
GO:BP,	regulation of bone mineralization involved in bone maturation	GO:1900157	1	0	7	110	1	21128	LTF
GO:BP,	iron coordination entity transport	GO:1901678	1	0	14	110	2	21128	HRG,LCN2
GO:BP,	cellular response to nitrogen compound	GO:1901699	1	0	698	110	6	21128	ITGB3,CA2,GRB2,RGS10,PTK2,CD36
GO:BP,	positive regulation of neutrophil activation	GO:1902565	1	0	6	110	1	21128	ITGB2
GO:BP,	negative regulation of RNA biosynthetic process	GO:1902679	1	0	1327	110	4	21128	LIMS1,H1-4,CD36,TSG101
GO:BP,	positive regulation of RNA biosynthetic process	GO:1902680	1	0	1710	110	9	21128	SERPINF2,PDLIM1,PF4,ITGA6,WBP2,PITHD1,TGFB1I1,TSG101,ASH1L
GO:BP,	regulation of receptor localization to synapse	GO:1902683	1	0	18	110	1	21128	STX7
GO:BP,	positive regulation of receptor localization to synapse	GO:1902685	1	0	4	110	1	21128	STX7
GO:BP,	positive regulation of chondrocyte proliferation	GO:1902732	1	0	9	110	1	21128	LTF
GO:BP,	regulation of lamellipodium organization	GO:1902743	1	0	53	110	1	21128	HRG
GO:BP,	negative regulation of lamellipodium organization	GO:1902744	1	0	6	110	1	21128	HRG
GO:BP,	regulation of cell cycle G2/M phase transition	GO:1902749	1	0	110	110	1	21128	VPS4A
GO:BP,	negative regulation of cell cycle G2/M phase transition	GO:1902750	1	0	65	110	1	21128	VPS4A
GO:BP,	late endosome to lysosome transport	GO:1902774	1	0	23	110	1	21128	VPS4A
GO:BP,	regulation of cell cycle G1/S phase transition	GO:1902806	1	0	189	110	1	21128	PTPN6
GO:BP,	microtubule cytoskeleton organization involved in mitosis	GO:1902850	1	0	168	110	2	21128	VCP,PTPA
GO:BP,	regulation of response to oxidative stress	GO:1902882	1	0	91	110	1	21128	CD36
GO:BP,	regulation of supramolecular fiber organization	GO:1902903	1	0	381	110	3	21128	SERPINF2,CORO1A,GRB2
GO:BP,	negative regulation of supramolecular fiber organization	GO:1902904	1	0	167	110	1	21128	CORO1A
GO:BP,	positive regulation of supramolecular fiber organization	GO:1902905	1	0	175	110	2	21128	SERPINF2,GRB2
GO:BP,	positive regulation of protein deubiquitination	GO:1903003	1	0	6	110	1	21128	VCP
GO:BP,	regulation of protein K63-linked deubiquitination	GO:1903004	1	0	2	110	1	21128	VCP
GO:BP,	positive regulation of protein K63-linked deubiquitination	GO:1903006	1	0	2	110	1	21128	VCP
GO:BP,	positive regulation of Lys63-specific deubiquitinase activity	GO:1903007	1	0	1	110	1	21128	VCP
GO:BP,	organelle disassembly	GO:1903008	1	0	140	110	1	21128	VCP
GO:BP,	positive regulation of opsonization	GO:1903028	1	0	9	110	1	21128	COLEC11
GO:BP,	regulation of neutrophil activation	GO:1902563	1	0	14	110	1	21128	ITGB2
GO:BP,	negative regulation of cellular response to vascular endothelial growth factor stimulus	GO:1902548	1	0	13	110	1	21128	HRG
GO:BP,	regulation of cellular response to vascular endothelial growth factor stimulus	GO:1902547	1	0	24	110	1	21128	HRG
GO:BP,	negative regulation of intracellular signal transduction	GO:1902532	1	0	514	110	3	21128	PTPN6,PTPRC,ASH1L
GO:BP,	cellular response to oxygen-containing compound	GO:1901701	1	0	1191	110	13	21128	VCP,LTF,ITGB3,CA2,PPBP,CPB2,PF4,GRB2,PF4V1,RGS10,PTK2,CD36,RWDD1
GO:BP,	regulation of cell proliferation involved in kidney development	GO:1901722	1	0	14	110	1	21128	ITGB3
GO:BP,	positive regulation of cell proliferation involved in kidney development	GO:1901724	1	0	9	110	1	21128	ITGB3
GO:BP,	positive regulation of platelet aggregation	GO:1901731	1	0	11	110	1	21128	IL6ST
GO:BP,	positive regulation of proteasomal protein catabolic process	GO:1901800	1	0	119	110	1	21128	VCP
GO:BP,	positive regulation of cellular respiration	GO:1901857	1	0	14	110	1	21128	VCP
GO:BP,	regulation of cell junction assembly	GO:1901888	1	0	206	110	3	21128	HRG,LIMS1,PTK2
GO:BP,	positive regulation of cell junction assembly	GO:1901890	1	0	107	110	2	21128	HRG,LIMS1
GO:BP,	regulation of protein acetylation	GO:1901983	1	0	89	110	1	21128	WBP2
GO:BP,	positive regulation of protein acetylation	GO:1901985	1	0	50	110	1	21128	WBP2
GO:BP,	regulation of cell cycle phase transition	GO:1901987	1	0	432	110	2	21128	PTPN6,VPS4A
GO:BP,	response to nitrogen compound	GO:1901698	1	0	1123	110	11	21128	VCP,ITGB3,CA2,CDA,CANX,GRB2,ITGB2,RGS10,PTK2,CD36,PIK3C3
GO:BP,	negative regulation of cell cycle phase transition	GO:1901988	1	0	256	110	1	21128	VPS4A
GO:BP,	negative regulation of mitotic cell cycle phase transition	GO:1901991	1	0	178	110	1	21128	VPS4A
GO:BP,	fatty acid transmembrane transport	GO:1902001	1	0	18	110	1	21128	CD36
GO:BP,	regulation of extrinsic apoptotic signaling pathway via death domain receptors	GO:1902041	1	0	48	110	3	21128	FGB,FGG,FGA
GO:BP,	regulation of leukocyte differentiation	GO:1902105	1	0	316	110	4	21128	LTF,PTPN6,PF4,PTPRC
GO:BP,	negative regulation of leukocyte differentiation	GO:1902106	1	0	105	110	1	21128	LTF
GO:BP,	positive regulation of leukocyte differentiation	GO:1902107	1	0	184	110	2	21128	PF4,PTPRC
GO:BP,	regulation of organelle assembly	GO:1902115	1	0	210	110	3	21128	LCP1,TSG101,ASAP1
GO:BP,	positive regulation of organelle assembly	GO:1902117	1	0	83	110	2	21128	LCP1,ASAP1
GO:BP,	regulation of sodium ion transmembrane transport	GO:1902305	1	0	60	110	1	21128	STOM
GO:BP,	mitotic cytokinetic process	GO:1902410	1	0	25	110	1	21128	VPS4A
GO:BP,	protein localization to cell junction	GO:1902414	1	0	100	110	2	21128	PECAM1,RAB27B
GO:BP,	regulation of mitotic cell cycle phase transition	GO:1901990	1	0	331	110	2	21128	PTPN6,VPS4A
GO:BP,	regulation of leukocyte cell-cell adhesion	GO:1903037	1	0	365	110	8	21128	SELP,FGL1,GP1BA,CORO1A,PTPN6,ITGB2,PTPRC,IL6ST
GO:BP,	cell-cell signaling by wnt	GO:0198738	1	0	450	110	2	21128	VCP,TGFB1I1
GO:BP,	regulation of cell-substrate junction organization	GO:0150116	1	0	69	110	3	21128	HRG,LIMS1,PTK2
GO:BP,	inorganic cation transmembrane transport	GO:0098662	1	0	828	110	7	21128	ITGB3,GP5,GP1BA,CORO1A,PTPN6,PTPRC,STOM
GO:BP,	import across plasma membrane	GO:0098739	1	0	197	110	1	21128	CD36
GO:BP,	cell-cell adhesion via plasma-membrane adhesion molecules	GO:0098742	1	0	285	110	3	21128	SELP,PECAM1,ITGB2
GO:BP,	cell aggregation	GO:0098743	1	0	23	110	1	21128	LTF
GO:BP,	response to interleukin-7	GO:0098760	1	0	15	110	1	21128	LSP1
GO:BP,	cellular response to interleukin-7	GO:0098761	1	0	15	110	1	21128	LSP1
GO:BP,	inorganic ion homeostasis	GO:0098771	1	0	548	110	10	21128	LTF,ITGB3,LCN2,GP5,GP1BA,CORO1A,S100A8,PTPN6,S100A9,PTPRC
GO:BP,	neurotransmitter reuptake	GO:0098810	1	0	36	110	1	21128	ITGB3
GO:BP,	nuclear chromosome segregation	GO:0098813	1	0	340	110	1	21128	VPS4A
GO:BP,	protein transport along microtubule	GO:0098840	1	0	14	110	1	21128	RAB27B
GO:BP,	intestinal lipid absorption	GO:0098856	1	0	23	110	1	21128	CD36
GO:BP,	postsynaptic neurotransmitter receptor internalization	GO:0098884	1	0	20	110	1	21128	ITGB3
GO:BP,	regulation of action potential	GO:0098900	1	0	57	110	1	21128	CD36
GO:BP,	anterograde trans-synaptic signaling	GO:0098916	1	0	724	110	2	21128	PLG,CA2
GO:BP,	postsynaptic signal transduction	GO:0098926	1	0	41	110	1	21128	RGS10
GO:BP,	vesicle-mediated transport between endosomal compartments	GO:0098927	1	0	43	110	2	21128	CORO1A,PIK3C3
GO:BP,	axonal transport	GO:0098930	1	0	64	110	1	21128	RAB27B
GO:BP,	vesicle-mediated transport in synapse	GO:0099003	1	0	217	110	4	21128	ITGB3,CANX,RAB27B,ITSN2
GO:BP,	regulation of postsynaptic membrane neurotransmitter receptor levels	GO:0099072	1	0	66	110	1	21128	ITGB3
GO:BP,	microtubule-based transport	GO:0099111	1	0	208	110	1	21128	RAB27B
GO:BP,	microtubule-based protein transport	GO:0099118	1	0	14	110	1	21128	RAB27B
GO:BP,	regulation of postsynaptic neurotransmitter receptor internalization	GO:0099149	1	0	13	110	1	21128	ITGB3
GO:BP,	regulation of trans-synaptic signaling	GO:0099177	1	0	456	110	1	21128	CA2
GO:BP,	inorganic ion transmembrane transport	GO:0098660	1	0	920	110	7	21128	ITGB3,GP5,GP1BA,CORO1A,PTPN6,PTPRC,STOM
GO:BP,	import into cell	GO:0098657	1	0	247	110	3	21128	ITGB3,CD36,TSG101
GO:BP,	monoatomic cation transmembrane transport	GO:0098655	1	0	855	110	7	21128	ITGB3,GP5,GP1BA,CORO1A,PTPN6,PTPRC,STOM
GO:BP,	aggregation of unicellular organisms	GO:0098630	1	0	2	110	1	21128	LTF
GO:BP,	regulation of plasma lipoprotein particle levels	GO:0097006	1	0	71	110	2	21128	APOM,CD36
GO:BP,	energy homeostasis	GO:0097009	1	0	43	110	1	21128	CD36
GO:BP,	receptor localization to synapse	GO:0097120	1	0	58	110	1	21128	STX7
GO:BP,	apoptotic signaling pathway	GO:0097190	1	0	597	110	8	21128	FGB,FGG,FGA,S100A8,PF4,ITGA6,S100A9,PTPRC
GO:BP,	extrinsic apoptotic signaling pathway	GO:0097191	1	0	224	110	6	21128	FGB,FGG,FGA,PF4,ITGA6,PTPRC
GO:BP,	extrinsic apoptotic signaling pathway in absence of ligand	GO:0097192	1	0	70	110	1	21128	PF4
GO:BP,	intrinsic apoptotic signaling pathway	GO:0097193	1	0	299	110	2	21128	S100A8,S100A9
GO:BP,	execution phase of apoptosis	GO:0097194	1	0	72	110	1	21128	COLEC11
GO:BP,	amyloid-beta clearance	GO:0097242	1	0	37	110	2	21128	ITGB2,CD36
GO:BP,	response to alcohol	GO:0097305	1	0	251	110	3	21128	A2M,S100A8,CDA
GO:BP,	plasma membrane tubulation	GO:0097320	1	0	20	110	2	21128	BIN2,ASAP1
GO:BP,	trans-synaptic signaling by BDNF, modulating synaptic transmission	GO:0099183	1	0	4	110	1	21128	PLG
GO:BP,	liver regeneration	GO:0097421	1	0	30	110	1	21128	CPB2
GO:BP,	dendrite extension	GO:0097484	1	0	35	110	1	21128	ITSN2
GO:BP,	neuron projection guidance	GO:0097485	1	0	241	110	1	21128	PTK2
GO:BP,	sequestering of iron ion	GO:0097577	1	0	6	110	1	21128	LCN2
GO:BP,	lamellipodium organization	GO:0097581	1	0	91	110	1	21128	HRG
GO:BP,	nucleic acid-templated transcription	GO:0097659	1	0	3585	110	19	21128	LTF,SERPINF2,PDLIM1,S100A12,LIMS1,S100A8,PF4,ITGA6,H1-4,S100A9,ITGB2,WBP2,CD36,PITHD1,TGFB1I1,TSG101,RWDD1,ZNF578,ASH1L
GO:BP,	histone H3-K36 dimethylation	GO:0097676	1	0	4	110	1	21128	ASH1L
GO:BP,	receptor signaling pathway via STAT	GO:0097696	1	0	173	110	2	21128	PTPRC,IL6ST
GO:BP,	sperm motility	GO:0097722	1	0	136	110	1	21128	ASH1L
GO:BP,	extracellular exosome biogenesis	GO:0097734	1	0	21	110	2	21128	TSG101,VPS4A
GO:BP,	blood vessel diameter maintenance	GO:0097746	1	0	143	110	5	21128	FGB,FGG,FGA,HBB,SERPINF2
GO:BP,	histone H3-K27 trimethylation	GO:0098532	1	0	10	110	1	21128	H1-4
GO:BP,	supramolecular fiber organization	GO:0097435	1	0	814	110	7	21128	LCP1,SERPINF2,PDLIM1,CORO1A,GRB2,IQGAP2,CD36
GO:BP,	positive regulation of cell-substrate junction organization	GO:0150117	1	0	31	110	2	21128	HRG,LIMS1
GO:BP,	trans-synaptic signaling by BDNF	GO:0099191	1	0	5	110	1	21128	PLG
GO:BP,	synaptic vesicle endosomal processing	GO:0099532	1	0	9	110	1	21128	ITSN2
GO:BP,	extracellular vesicle biogenesis	GO:0140112	1	0	23	110	2	21128	TSG101,VPS4A
GO:BP,	presynaptic endocytosis	GO:0140238	1	0	67	110	3	21128	CANX,RAB27B,ITSN2
GO:BP,	postsynaptic endocytosis	GO:0140239	1	0	20	110	1	21128	ITGB3
GO:BP,	export from cell	GO:0140352	1	0	871	110	13	21128	FGB,FGG,FGA,CORO1A,RBP4,CPB2,UNC13D,CANX,ITGB2,RAB27B,TSG101,PIK3C3,VPS4A
GO:BP,	lipid import into cell	GO:0140354	1	0	19	110	1	21128	CD36
GO:BP,	defense response to symbiont	GO:0140546	1	0	305	110	2	21128	UNC13D,PTPRC
GO:BP,	inflammasome complex assembly	GO:0140632	1	0	24	110	1	21128	CD36
GO:BP,	non-membrane-bounded organelle assembly	GO:0140694	1	0	386	110	3	21128	LCP1,BIN2,ASAP1
GO:BP,	interferon-mediated signaling pathway	GO:0140888	1	0	101	110	1	21128	PTPN6
GO:BP,	cell surface toll-like receptor signaling pathway	GO:0140895	1	0	48	110	1	21128	LTF
GO:BP,	disruption of cellular component of another organism	GO:0140975	1	0	17	110	1	21128	LTF
GO:BP,	clathrin-dependent synaptic vesicle endocytosis	GO:0150007	1	0	3	110	1	21128	ITSN2
GO:BP,	oxidised low-density lipoprotein particle clearance	GO:0150024	1	0	1	110	1	21128	CD36
GO:BP,	visual system development	GO:0150063	1	0	402	110	1	21128	RBP4
GO:BP,	neuroinflammatory response	GO:0150076	1	0	68	110	3	21128	MMP8,ITGB2,PTPRC
GO:BP,	regulation of neuroinflammatory response	GO:0150077	1	0	34	110	2	21128	MMP8,PTPRC
GO:BP,	positive regulation of neuroinflammatory response	GO:0150078	1	0	15	110	1	21128	MMP8
GO:BP,	negative regulation of neuroinflammatory response	GO:0150079	1	0	14	110	1	21128	PTPRC
GO:BP,	amyloid-beta clearance by cellular catabolic process	GO:0150094	1	0	8	110	1	21128	CD36
GO:BP,	transport across blood-brain barrier	GO:0150104	1	0	87	110	1	21128	CD36
GO:BP,	protein localization to cell-cell junction	GO:0150105	1	0	21	110	1	21128	PECAM1
GO:BP,	late endosome to vacuole transport	GO:0045324	1	0	36	110	2	21128	TSG101,VPS4A
GO:BP,	positive regulation of protein localization to cell-cell junction	GO:0150107	1	0	1	110	1	21128	PECAM1
GO:BP,	organelle localization by membrane tethering	GO:0140056	1	0	82	110	1	21128	STX7
GO:BP,	cellular response to oxidised low-density lipoprotein particle stimulus	GO:0140052	1	0	11	110	1	21128	CD36
GO:BP,	mitotic nuclear division	GO:0140014	1	0	294	110	1	21128	VPS4A
GO:BP,	olefinic compound metabolic process	GO:0120254	1	0	159	110	1	21128	RBP4
GO:BP,	synaptic signaling	GO:0099536	1	0	756	110	3	21128	PLG,CA2,RGS10
GO:BP,	trans-synaptic signaling	GO:0099537	1	0	731	110	2	21128	PLG,CA2
GO:BP,	trans-synaptic signaling, modulating synaptic transmission	GO:0099550	1	0	13	110	1	21128	PLG
GO:BP,	neurotransmitter receptor internalization	GO:0099590	1	0	27	110	1	21128	ITGB3
GO:BP,	axo-dendritic protein transport	GO:0099640	1	0	9	110	1	21128	RAB27B
GO:BP,	anterograde axonal protein transport	GO:0099641	1	0	8	110	1	21128	RAB27B
GO:BP,	mitotic nuclear membrane organization	GO:0101024	1	0	9	110	1	21128	VPS4A
GO:BP,	cellular response to environmental stimulus	GO:0104004	1	0	336	110	2	21128	ITGB3,GRB2
GO:BP,	cold-induced thermogenesis	GO:0106106	1	0	147	110	2	21128	LCN2,CD36
GO:BP,	protein-DNA covalent cross-linking repair	GO:0106300	1	0	7	110	1	21128	VCP
GO:BP,	regulation of actomyosin structure organization	GO:0110020	1	0	98	110	1	21128	SERPINF2
GO:BP,	synaptic vesicle cycle	GO:0099504	1	0	196	110	3	21128	CANX,RAB27B,ITSN2
GO:BP,	regulation of actin filament organization	GO:0110053	1	0	276	110	3	21128	SERPINF2,CORO1A,GRB2
GO:BP,	regulation of plasma membrane bounded cell projection assembly	GO:0120032	1	0	199	110	1	21128	HRG
GO:BP,	negative regulation of plasma membrane bounded cell projection assembly	GO:0120033	1	0	35	110	1	21128	HRG
GO:BP,	regulation of plasma membrane bounded cell projection organization	GO:0120035	1	0	640	110	3	21128	HRG,ITGA6,S100A9
GO:BP,	plasma membrane bounded cell projection organization	GO:0120036	1	0	1518	110	9	21128	HRG,CORO1A,MANF,ITGA6,S100A9,PTK2,RP2,ITSN2,ASAP1
GO:BP,	plasma membrane bounded cell projection morphogenesis	GO:0120039	1	0	651	110	2	21128	PTK2,ITSN2
GO:BP,	regulation of macrophage proliferation	GO:0120040	1	0	7	110	1	21128	PTK2
GO:BP,	positive regulation of macrophage proliferation	GO:0120041	1	0	6	110	1	21128	PTK2
GO:BP,	regulation of cold-induced thermogenesis	GO:0120161	1	0	147	110	2	21128	LCN2,CD36
GO:BP,	positive regulation of cold-induced thermogenesis	GO:0120162	1	0	98	110	2	21128	LCN2,CD36
GO:BP,	tight junction assembly	GO:0120192	1	0	71	110	1	21128	PECAM1
GO:BP,	tight junction organization	GO:0120193	1	0	77	110	1	21128	PECAM1
GO:BP,	plasma membrane bounded cell projection assembly	GO:0120031	1	0	572	110	3	21128	HRG,RP2,ASAP1
GO:BP,	negative regulation of leukocyte cell-cell adhesion	GO:1903038	1	0	138	110	2	21128	FGL1,PTPN6
GO:BP,	regulation of proteolysis involved in protein catabolic process	GO:1903050	1	0	231	110	3	21128	VCP,PTK2,PITHD1
GO:BP,	regulation of endothelial cell apoptotic process	GO:2000351	1	0	51	110	3	21128	FGB,FGG,FGA
GO:BP,	negative regulation of endothelial cell apoptotic process	GO:2000352	1	0	31	110	3	21128	FGB,FGG,FGA
GO:BP,	regulation of prostaglandin-E synthase activity	GO:2000361	1	0	3	110	1	21128	ITGB2
GO:BP,	positive regulation of prostaglandin-E synthase activity	GO:2000363	1	0	3	110	1	21128	ITGB2
GO:BP,	regulation of reactive oxygen species metabolic process	GO:2000377	1	0	142	110	4	21128	MMP8,GRB2,ITGB2,CD36
GO:BP,	regulation of ubiquitin-dependent endocytosis	GO:2000395	1	0	2	110	1	21128	TSG101
GO:BP,	positive regulation of ubiquitin-dependent endocytosis	GO:2000397	1	0	2	110	1	21128	TSG101
GO:BP,	regulation of lymphocyte migration	GO:2000401	1	0	69	110	2	21128	ITGB3,CORO1A
GO:BP,	positive regulation of lymphocyte migration	GO:2000403	1	0	43	110	2	21128	ITGB3,CORO1A
GO:BP,	regulation of T cell migration	GO:2000404	1	0	49	110	2	21128	ITGB3,CORO1A
GO:BP,	positive regulation of T cell migration	GO:2000406	1	0	35	110	2	21128	ITGB3,CORO1A
GO:BP,	regulation of apoptotic cell clearance	GO:2000425	1	0	10	110	1	21128	C4A
GO:BP,	positive regulation of apoptotic cell clearance	GO:2000427	1	0	8	110	1	21128	C4A
GO:BP,	regulation of hematopoietic stem cell migration	GO:2000471	1	0	2	110	1	21128	PTPRC
GO:BP,	positive regulation of hematopoietic stem cell migration	GO:2000473	1	0	2	110	1	21128	PTPRC
GO:BP,	regulation of opioid receptor signaling pathway	GO:2000474	1	0	3	110	1	21128	ITGB3
GO:BP,	positive regulation of opioid receptor signaling pathway	GO:2000476	1	0	1	110	1	21128	ITGB3
GO:BP,	positive regulation of blood vessel remodeling	GO:2000504	1	0	2	110	1	21128	HRG
GO:BP,	positive regulation of stem cell proliferation	GO:2000648	1	0	57	110	1	21128	PTPRC
GO:BP,	regulation of sodium ion transmembrane transporter activity	GO:2000649	1	0	51	110	1	21128	STOM
GO:BP,	regulation of peptidyl-lysine acetylation	GO:2000756	1	0	75	110	1	21128	WBP2
GO:BP,	positive regulation of peptidyl-lysine acetylation	GO:2000758	1	0	40	110	1	21128	WBP2
GO:BP,	negative regulation of anoikis	GO:2000811	1	0	18	110	1	21128	PTK2
GO:BP,	negative regulation of hepatocyte proliferation	GO:2000346	1	0	4	110	1	21128	CPB2
GO:BP,	regulation of hepatocyte proliferation	GO:2000345	1	0	17	110	1	21128	CPB2
GO:BP,	positive regulation of blood microparticle formation	GO:2000334	1	0	2	110	1	21128	CD36
GO:BP,	regulation of blood microparticle formation	GO:2000332	1	0	2	110	1	21128	CD36
GO:BP,	regulation of multicellular organismal development	GO:2000026	1	0	1400	110	10	21128	LTF,HRG,ITGB3,RBP4,PTPN6,PF4,ITGB2,PTPRC,PITHD1,IL6ST
GO:BP,	regulation of G1/S transition of mitotic cell cycle	GO:2000045	1	0	161	110	1	21128	PTPN6
GO:BP,	regulation of cell-cell adhesion mediated by cadherin	GO:2000047	1	0	21	110	2	21128	PLG,SERPINF2
GO:BP,	negative regulation of cell-cell adhesion mediated by cadherin	GO:2000048	1	0	10	110	1	21128	PLG
GO:BP,	positive regulation of cell-cell adhesion mediated by cadherin	GO:2000049	1	0	11	110	1	21128	SERPINF2
GO:BP,	regulation of ubiquitin-dependent protein catabolic process	GO:2000058	1	0	173	110	2	21128	VCP,PTK2
GO:BP,	positive regulation of ubiquitin-dependent protein catabolic process	GO:2000060	1	0	112	110	2	21128	VCP,PTK2
GO:BP,	regulation of cysteine-type endopeptidase activity	GO:2000116	1	0	234	110	4	21128	VCP,LTF,S100A8,S100A9
GO:BP,	negative regulation of cysteine-type endopeptidase activity	GO:2000117	1	0	90	110	1	21128	LTF
GO:BP,	regulation of removal of superoxide radicals	GO:2000121	1	0	6	110	1	21128	CD36
GO:BP,	regulation of cell motility	GO:2000145	1	0	988	110	10	21128	HRG,ITGB3,SELP,ARHGDIB,GP1BA,CORO1A,PECAM1,ITGA6,PTPRC,PTK2
GO:BP,	positive regulation of androgen receptor activity	GO:2000825	1	0	5	110	1	21128	RWDD1
GO:BP,	negative regulation of cell motility	GO:2000146	1	0	304	110	2	21128	HRG,ARHGDIB
GO:BP,	regulation of ubiquitin-specific protease activity	GO:2000152	1	0	6	110	1	21128	VCP
GO:BP,	positive regulation of ubiquitin-specific protease activity	GO:2000158	1	0	3	110	1	21128	VCP
GO:BP,	negative regulation of blood vessel morphogenesis	GO:2000181	1	0	103	110	2	21128	HRG,PF4
GO:BP,	regulation of anoikis	GO:2000209	1	0	25	110	1	21128	PTK2
GO:BP,	regulation of reproductive process	GO:2000241	1	0	207	110	2	21128	ITGB3,ARHGDIB
GO:BP,	negative regulation of reproductive process	GO:2000242	1	0	74	110	1	21128	ARHGDIB
GO:BP,	regulation of actin cytoskeleton reorganization	GO:2000249	1	0	43	110	2	21128	ARHGDIB,IQGAP2
GO:BP,	negative regulation of signaling receptor activity	GO:2000272	1	0	50	110	1	21128	TSG101
GO:BP,	positive regulation of signaling receptor activity	GO:2000273	1	0	46	110	1	21128	RWDD1
GO:BP,	regulation of tumor necrosis factor (ligand) superfamily member 11 production	GO:2000307	1	0	3	110	1	21128	LTF
GO:BP,	negative regulation of tumor necrosis factor (ligand) superfamily member 11 production	GO:2000308	1	0	1	110	1	21128	LTF
GO:BP,	positive regulation of cell motility	GO:2000147	1	0	557	110	7	21128	ITGB3,SELP,CORO1A,PECAM1,ITGA6,PTPRC,PTK2
GO:BP,	cellular response to chemokine	GO:1990869	1	0	99	110	3	21128	PPBP,PF4,PF4V1
GO:BP,	positive regulation of oligopeptide transport	GO:2000878	1	0	2	110	1	21128	CA2
GO:BP,	regulation of endothelial cell chemotaxis	GO:2001026	1	0	21	110	1	21128	HRG
GO:BP,	negative regulation of endothelial cell chemotaxis	GO:2001027	1	0	4	110	1	21128	HRG
GO:BP,	regulation of integrin-mediated signaling pathway	GO:2001044	1	0	21	110	1	21128	LIMS1
GO:BP,	positive regulation of integrin-mediated signaling pathway	GO:2001046	1	0	13	110	1	21128	LIMS1
GO:BP,	positive regulation of cysteine-type endopeptidase activity	GO:2001056	1	0	143	110	3	21128	VCP,S100A8,S100A9
GO:BP,	reactive nitrogen species metabolic process	GO:2001057	1	0	79	110	4	21128	HBB,MMP8,ITGB2,CD36
GO:BP,	regulation of RNA biosynthetic process	GO:2001141	1	0	3490	110	19	21128	LTF,SERPINF2,PDLIM1,S100A12,LIMS1,S100A8,PF4,ITGA6,H1-4,S100A9,ITGB2,WBP2,CD36,PITHD1,TGFB1I1,TSG101,RWDD1,ZNF578,ASH1L
GO:BP,	regulation of dipeptide transmembrane transport	GO:2001148	1	0	2	110	1	21128	CA2
GO:BP,	positive regulation of dipeptide transmembrane transport	GO:2001150	1	0	2	110	1	21128	CA2
GO:BP,	regulation of ATP biosynthetic process	GO:2001169	1	0	21	110	1	21128	VCP
GO:BP,	positive regulation of ATP biosynthetic process	GO:2001171	1	0	14	110	1	21128	VCP
GO:BP,	regulation of osteoclast development	GO:2001204	1	0	10	110	1	21128	LTF
GO:BP,	positive regulation of dipeptide transport	GO:2000880	1	0	2	110	1	21128	CA2
GO:BP,	negative regulation of osteoclast development	GO:2001205	1	0	4	110	1	21128	LTF
GO:BP,	regulation of apoptotic signaling pathway	GO:2001233	1	0	366	110	8	21128	FGB,FGG,FGA,S100A8,PF4,ITGA6,S100A9,PTPRC
GO:BP,	negative regulation of apoptotic signaling pathway	GO:2001234	1	0	231	110	5	21128	FGB,FGG,FGA,PF4,ITGA6
GO:BP,	positive regulation of apoptotic signaling pathway	GO:2001235	1	0	130	110	3	21128	S100A8,S100A9,PTPRC
GO:BP,	positive regulation of extrinsic apoptotic signaling pathway	GO:2001238	1	0	50	110	1	21128	PTPRC
GO:BP,	regulation of extrinsic apoptotic signaling pathway in absence of ligand	GO:2001239	1	0	46	110	1	21128	PF4
GO:BP,	negative regulation of extrinsic apoptotic signaling pathway in absence of ligand	GO:2001240	1	0	36	110	1	21128	PF4
GO:BP,	regulation of intrinsic apoptotic signaling pathway	GO:2001242	1	0	168	110	2	21128	S100A8,S100A9
GO:BP,	positive regulation of intrinsic apoptotic signaling pathway	GO:2001244	1	0	60	110	2	21128	S100A8,S100A9
GO:BP,	regulation of cation channel activity	GO:2001257	1	0	141	110	1	21128	STOM
GO:BP,	regulation of chloride transport	GO:2001225	1	0	8	110	1	21128	CA2
GO:BP,	mitotic cell cycle process	GO:1903047	1	0	773	110	4	21128	VCP,PTPN6,PTPA,VPS4A
GO:BP,	response to chemokine	GO:1990868	1	0	99	110	3	21128	PPBP,PF4,PF4V1
GO:BP,	adaptive thermogenesis	GO:1990845	1	0	160	110	2	21128	LCN2,CD36
GO:BP,	regulation of extracellular exosome assembly	GO:1903551	1	0	6	110	1	21128	TSG101
GO:BP,	negative regulation of tumor necrosis factor superfamily cytokine production	GO:1903556	1	0	62	110	2	21128	LTF,PTPN6
GO:BP,	positive regulation of tumor necrosis factor superfamily cytokine production	GO:1903557	1	0	105	110	4	21128	MMP8,PF4,PTPRC,CD36
GO:BP,	regulation of ATP metabolic process	GO:1903578	1	0	72	110	1	21128	VCP
GO:BP,	positive regulation of ATP metabolic process	GO:1903580	1	0	36	110	1	21128	VCP
GO:BP,	regulation of protein tyrosine phosphatase activity	GO:1903613	1	0	6	110	1	21128	PTPRC
GO:BP,	positive regulation of protein tyrosine phosphatase activity	GO:1903615	1	0	3	110	1	21128	PTPRC
GO:BP,	tarsal gland development	GO:1903699	1	0	1	110	1	21128	ASH1L
GO:BP,	regulation of hemopoiesis	GO:1903706	1	0	410	110	5	21128	LTF,PTPN6,PF4,PTPRC,PITHD1
GO:BP,	negative regulation of hemopoiesis	GO:1903707	1	0	109	110	1	21128	LTF
GO:BP,	positive regulation of hemopoiesis	GO:1903708	1	0	184	110	2	21128	PF4,PTPRC
GO:BP,	uterine gland development	GO:1903709	1	0	1	110	1	21128	ASH1L
GO:BP,	regulation of aerobic respiration	GO:1903715	1	0	30	110	1	21128	VCP
GO:BP,	regulation of plasma membrane organization	GO:1903729	1	0	19	110	1	21128	ASAP1
GO:BP,	organic acid transmembrane transport	GO:1903825	1	0	153	110	1	21128	CD36
GO:BP,	negative regulation of protein localization	GO:1903828	1	0	196	110	1	21128	CD36
GO:BP,	positive regulation of protein localization	GO:1903829	1	0	459	110	8	21128	FGB,FGG,FGA,RBP4,PECAM1,ITGB2,STOM,TSG101
GO:BP,	response to arsenite ion	GO:1903842	1	0	4	110	1	21128	VCP
GO:BP,	cellular response to arsenite ion	GO:1903843	1	0	4	110	1	21128	VCP
GO:BP,	regulation of cellular response to transforming growth factor beta stimulus	GO:1903844	1	0	141	110	1	21128	TGFB1I1
GO:BP,	positive regulation of cellular response to transforming growth factor beta stimulus	GO:1903846	1	0	31	110	1	21128	TGFB1I1
GO:BP,	regulation of dendrite extension	GO:1903859	1	0	25	110	1	21128	ITSN2
GO:BP,	positive regulation of dendrite extension	GO:1903861	1	0	22	110	1	21128	ITSN2
GO:BP,	positive regulation of exosomal secretion	GO:1903543	1	0	15	110	2	21128	TSG101,VPS4A
GO:BP,	regulation of exosomal secretion	GO:1903541	1	0	17	110	2	21128	TSG101,VPS4A
GO:BP,	regulation of protein targeting	GO:1903533	1	0	78	110	2	21128	ITGB2,STOM
GO:BP,	positive regulation of membrane tubulation	GO:1903527	1	0	4	110	1	21128	ASAP1
GO:BP,	positive regulation of proteolysis involved in protein catabolic process	GO:1903052	1	0	138	110	2	21128	VCP,PTK2
GO:BP,	regulation of extracellular matrix organization	GO:1903053	1	0	54	110	2	21128	ITGB3,CPB2
GO:BP,	positive regulation of extracellular matrix organization	GO:1903055	1	0	26	110	1	21128	CPB2
GO:BP,	regulation of protein localization to plasma membrane	GO:1903076	1	0	103	110	2	21128	STX7,VPS4A
GO:BP,	mononuclear cell differentiation	GO:1903131	1	0	474	110	2	21128	PTPN6,PTPRC
GO:BP,	regulation of calcium ion transmembrane transport	GO:1903169	1	0	185	110	3	21128	ITGB3,CORO1A,PTPN6
GO:BP,	regulation of leukocyte tethering or rolling	GO:1903236	1	0	18	110	2	21128	SELP,GP1BA
GO:BP,	positive regulation of leukocyte tethering or rolling	GO:1903238	1	0	13	110	2	21128	SELP,GP1BA
GO:BP,	regulation of regulated secretory pathway	GO:1903305	1	0	148	110	2	21128	UNC13D,ITGB2
GO:BP,	positive regulation of regulated secretory pathway	GO:1903307	1	0	52	110	2	21128	UNC13D,ITGB2
GO:BP,	regulation of protein maturation	GO:1903317	1	0	72	110	2	21128	SERPINF2,CPB2
GO:BP,	positive regulation of oxidative phosphorylation	GO:1903862	1	0	2	110	1	21128	VCP
GO:BP,	negative regulation of protein maturation	GO:1903318	1	0	29	110	2	21128	SERPINF2,CPB2
GO:BP,	positive regulation of protein modification by small protein conjugation or removal	GO:1903322	1	0	139	110	1	21128	VCP
GO:BP,	reactive oxygen species biosynthetic process	GO:1903409	1	0	56	110	2	21128	MMP8,CD36
GO:BP,	regulation of reactive oxygen species biosynthetic process	GO:1903426	1	0	43	110	2	21128	MMP8,CD36
GO:BP,	positive regulation of reactive oxygen species biosynthetic process	GO:1903428	1	0	19	110	2	21128	MMP8,CD36
GO:BP,	regulation of nucleic acid-templated transcription	GO:1903506	1	0	3467	110	19	21128	LTF,SERPINF2,PDLIM1,S100A12,LIMS1,S100A8,PF4,ITGA6,H1-4,S100A9,ITGB2,WBP2,CD36,PITHD1,TGFB1I1,TSG101,RWDD1,ZNF578,ASH1L
GO:BP,	negative regulation of nucleic acid-templated transcription	GO:1903507	1	0	1313	110	4	21128	LIMS1,H1-4,CD36,TSG101
GO:BP,	positive regulation of nucleic acid-templated transcription	GO:1903508	1	0	1703	110	9	21128	SERPINF2,PDLIM1,PF4,ITGA6,WBP2,PITHD1,TGFB1I1,TSG101,ASH1L
GO:BP,	mucopolysaccharide metabolic process	GO:1903510	1	0	97	110	1	21128	GUSB
GO:BP,	endoplasmic reticulum to cytosol transport	GO:1903513	1	0	28	110	1	21128	VCP
GO:BP,	regulation of blood circulation	GO:1903522	1	0	252	110	3	21128	FGB,FGG,FGA
GO:BP,	regulation of membrane tubulation	GO:1903525	1	0	6	110	1	21128	ASAP1
GO:BP,	regulation of protein modification by small protein conjugation or removal	GO:1903320	1	0	252	110	1	21128	VCP
GO:BP,	vacuolar localization	GO:1990849	1	0	86	110	1	21128	UNC13D
GO:BP,	regulation of viral life cycle	GO:1903900	1	0	141	110	3	21128	LTF,TSG101,VPS4A
GO:BP,	regulation of microglial cell activation	GO:1903978	1	0	18	110	2	21128	MMP8,PTPRC
GO:BP,	positive regulation of Fc-gamma receptor signaling pathway involved in phagocytosis	GO:1905451	1	0	4	110	1	21128	PTPRC
GO:BP,	regulation of protein localization to membrane	GO:1905475	1	0	175	110	4	21128	ITGB2,STX7,STOM,VPS4A
GO:BP,	positive regulation of protein localization to membrane	GO:1905477	1	0	104	110	2	21128	ITGB2,STOM
GO:BP,	macrophage migration	GO:1905517	1	0	61	110	1	21128	PTK2
GO:BP,	regulation of macrophage migration	GO:1905521	1	0	45	110	1	21128	PTK2
GO:BP,	positive regulation of macrophage migration	GO:1905523	1	0	27	110	1	21128	PTK2
GO:BP,	negative regulation of low-density lipoprotein receptor activity	GO:1905598	1	0	5	110	1	21128	ITGB3
GO:BP,	regulation of protein localization to chromatin	GO:1905634	1	0	11	110	1	21128	VCP
GO:BP,	epididymis development	GO:1905867	1	0	4	110	1	21128	PTPN6
GO:BP,	regulation of response to endoplasmic reticulum stress	GO:1905897	1	0	82	110	1	21128	MANF
GO:BP,	regulation of lipid localization	GO:1905952	1	0	165	110	2	21128	ITGB3,CD36
GO:BP,	negative regulation of lipid localization	GO:1905953	1	0	46	110	1	21128	ITGB3
GO:BP,	positive regulation of lipid localization	GO:1905954	1	0	109	110	1	21128	CD36
GO:BP,	amyloid fibril formation	GO:1990000	1	0	39	110	1	21128	CD36
GO:BP,	response to nerve growth factor	GO:1990089	1	0	47	110	1	21128	CORO1A
GO:BP,	cellular response to nerve growth factor stimulus	GO:1990090	1	0	45	110	1	21128	CORO1A
GO:BP,	neuron projection extension	GO:1990138	1	0	175	110	1	21128	ITSN2
GO:BP,	exosomal secretion	GO:1990182	1	0	20	110	2	21128	TSG101,VPS4A
GO:BP,	cellular response to insulin-like growth factor stimulus	GO:1990314	1	0	9	110	1	21128	ITGB3
GO:BP,	lipid transport across blood-brain barrier	GO:1990379	1	0	6	110	1	21128	CD36
GO:BP,	embryonic liver development	GO:1990402	1	0	3	110	1	21128	A2M
GO:BP,	response to angiotensin	GO:1990776	1	0	31	110	1	21128	CA2
GO:BP,	protein localization to cell periphery	GO:1990778	1	0	338	110	2	21128	STX7,VPS4A
GO:BP,	regulation of Fc-gamma receptor signaling pathway involved in phagocytosis	GO:1905449	1	0	6	110	1	21128	PTPRC
GO:BP,	protein localization to presynapse	GO:1905383	1	0	10	110	1	21128	RAB27B
GO:BP,	positive regulation of membrane invagination	GO:1905155	1	0	14	110	1	21128	CD36
GO:BP,	regulation of membrane invagination	GO:1905153	1	0	16	110	1	21128	CD36
GO:BP,	negative regulation of microglial cell activation	GO:1903979	1	0	8	110	1	21128	PTPRC
GO:BP,	positive regulation of microglial cell activation	GO:1903980	1	0	8	110	1	21128	MMP8
GO:BP,	positive regulation of vasculature development	GO:1904018	1	0	165	110	2	21128	ITGB3,ITGB2
GO:BP,	epithelial cell apoptotic process	GO:1904019	1	0	134	110	3	21128	FGB,FGG,FGA
GO:BP,	regulation of epithelial cell apoptotic process	GO:1904035	1	0	106	110	3	21128	FGB,FGG,FGA
GO:BP,	negative regulation of epithelial cell apoptotic process	GO:1904036	1	0	59	110	3	21128	FGB,FGG,FGA
GO:BP,	regulation of monoatomic cation transmembrane transport	GO:1904062	1	0	329	110	4	21128	ITGB3,CORO1A,PTPN6,STOM
GO:BP,	DN2 thymocyte differentiation	GO:1904155	1	0	4	110	1	21128	PTPRC
GO:BP,	regulation of protein localization to cell periphery	GO:1904375	1	0	125	110	2	21128	STX7,VPS4A
GO:BP,	cellular response to angiotensin	GO:1904385	1	0	27	110	1	21128	CA2
GO:BP,	response to amyloid-beta	GO:1904645	1	0	48	110	1	21128	CD36
GO:BP,	positive regulation of viral life cycle	GO:1903902	1	0	25	110	2	21128	TSG101,VPS4A
GO:BP,	cellular response to amyloid-beta	GO:1904646	1	0	39	110	1	21128	CD36
GO:BP,	regulation of receptor signaling pathway via STAT	GO:1904892	1	0	108	110	1	21128	PTPRC
GO:BP,	ESCRT complex disassembly	GO:1904896	1	0	10	110	1	21128	VPS4A
GO:BP,	ESCRT III complex disassembly	GO:1904903	1	0	10	110	1	21128	VPS4A
GO:BP,	negative regulation of establishment of protein localization	GO:1904950	1	0	122	110	1	21128	CD36
GO:BP,	positive regulation of establishment of protein localization	GO:1904951	1	0	315	110	7	21128	FGB,FGG,FGA,RBP4,ITGB2,STOM,TSG101
GO:BP,	regulation of leukocyte adhesion to vascular endothelial cell	GO:1904994	1	0	31	110	3	21128	SELP,GP1BA,ITGB2
GO:BP,	autophagosome organization	GO:1905037	1	0	117	110	1	21128	PIK3C3
GO:BP,	carboxylic acid transmembrane transport	GO:1905039	1	0	152	110	1	21128	CD36
GO:BP,	cell surface receptor signaling pathway involved in cell-cell signaling	GO:1905114	1	0	576	110	2	21128	VCP,TGFB1I1
GO:BP,	response to acetylcholine	GO:1905144	1	0	34	110	1	21128	RGS10
GO:BP,	cellular response to acetylcholine	GO:1905145	1	0	31	110	1	21128	RGS10
GO:BP,	glucose transmembrane transport	GO:1904659	1	0	109	110	1	21128	PPBP
GO:BP,	regulation of protein localization to cell-cell junction	GO:0150106	1	0	3	110	1	21128	PECAM1
GO:BP,	endothelial cell migration	GO:0043542	1	0	218	110	4	21128	HRG,ITGB3,ITGB2,PTK2
GO:BP,	cell-cell junction organization	GO:0045216	1	0	204	110	2	21128	LIMS1,PECAM1
GO:BP,	regulation of adaptive immune response based on somatic recombination of immune receptors built from immunoglobulin superfamily domains	GO:0002822	1	0	176	110	5	21128	C4BPA,PTPN6,STX7,PTPRC,C4BPB
GO:BP,	positive regulation of adaptive immune response based on somatic recombination of immune receptors built from immunoglobulin superfamily domains	GO:0002824	1	0	108	110	2	21128	STX7,PTPRC
GO:BP,	regulation of response to biotic stimulus	GO:0002831	1	0	452	110	6	21128	A2M,LTF,HRG,PTPN6,CD36,COLEC11
GO:BP,	negative regulation of response to biotic stimulus	GO:0002832	1	0	120	110	2	21128	A2M,LTF
GO:BP,	positive regulation of response to biotic stimulus	GO:0002833	1	0	317	110	4	21128	LTF,HRG,CD36,COLEC11
GO:BP,	regulation of response to tumor cell	GO:0002834	1	0	20	110	1	21128	HRG
GO:BP,	positive regulation of response to tumor cell	GO:0002836	1	0	14	110	1	21128	HRG
GO:BP,	regulation of immune response to tumor cell	GO:0002837	1	0	19	110	1	21128	HRG
GO:BP,	positive regulation of immune response to tumor cell	GO:0002839	1	0	14	110	1	21128	HRG
GO:BP,	regulation of myeloid leukocyte mediated immunity	GO:0002886	1	0	60	110	2	21128	UNC13D,ITGB2
GO:BP,	positive regulation of myeloid leukocyte mediated immunity	GO:0002888	1	0	20	110	1	21128	ITGB2
GO:BP,	positive regulation of adaptive immune response	GO:0002821	1	0	114	110	3	21128	STX7,PTPRC,IL6ST
GO:BP,	positive regulation of immunoglobulin mediated immune response	GO:0002891	1	0	41	110	1	21128	PTPRC
GO:BP,	positive regulation of humoral immune response mediated by circulating immunoglobulin	GO:0002925	1	0	7	110	1	21128	PTPRC
GO:BP,	developmental process involved in reproduction	GO:0003006	1	0	971	110	5	21128	A2M,PLG,RBP4,PITHD1,ASH1L
GO:BP,	heart morphogenesis	GO:0003007	1	0	255	110	2	21128	RBP4,PTK2
GO:BP,	system process	GO:0003008	1	0	2280	110	11	21128	FGB,FGG,FGA,HBB,SERPINF2,AZGP1,RBP4,CD36,RP2,IL6ST,CKMT2
GO:BP,	muscle system process	GO:0003012	1	0	425	110	2	21128	IL6ST,CKMT2
GO:BP,	circulatory system process	GO:0003013	1	0	596	110	6	21128	FGB,FGG,FGA,HBB,SERPINF2,CD36
GO:BP,	renal system process	GO:0003014	1	0	128	110	2	21128	HBB,SERPINF2
GO:BP,	vascular process in circulatory system	GO:0003018	1	0	265	110	6	21128	FGB,FGG,FGA,HBB,SERPINF2,CD36
GO:BP,	regulation of systemic arterial blood pressure mediated by a chemical signal	GO:0003044	1	0	50	110	1	21128	SERPINF2
GO:BP,	renal system process involved in regulation of systemic arterial blood pressure	GO:0003071	1	0	26	110	1	21128	SERPINF2
GO:BP,	renal control of peripheral vascular resistance involved in regulation of systemic arterial blood pressure	GO:0003072	1	0	5	110	1	21128	SERPINF2
GO:BP,	positive regulation of humoral immune response	GO:0002922	1	0	22	110	1	21128	PTPRC
GO:BP,	regulation of systemic arterial blood pressure	GO:0003073	1	0	101	110	1	21128	SERPINF2
GO:BP,	regulation of peptide secretion	GO:0002791	1	0	190	110	5	21128	FGB,FGG,FGA,S100A8,RBP4
GO:BP,	positive regulation of myeloid leukocyte differentiation	GO:0002763	1	0	58	110	1	21128	PF4
GO:BP,	negative regulation of acute inflammatory response	GO:0002674	1	0	12	110	1	21128	ASH1L
GO:BP,	positive regulation of acute inflammatory response	GO:0002675	1	0	27	110	1	21128	IL6ST
GO:BP,	negative regulation of immune system process	GO:0002683	1	0	465	110	8	21128	A2M,C4BPA,LTF,FGL1,MASP1,PTPN6,PTPRC,C4BPB
GO:BP,	regulation of leukocyte migration	GO:0002685	1	0	229	110	5	21128	ITGB3,SELP,GP1BA,CORO1A,PTK2
GO:BP,	positive regulation of leukocyte migration	GO:0002687	1	0	151	110	4	21128	ITGB3,SELP,CORO1A,PTK2
GO:BP,	regulation of leukocyte chemotaxis	GO:0002688	1	0	126	110	1	21128	PTK2
GO:BP,	positive regulation of leukocyte chemotaxis	GO:0002690	1	0	98	110	1	21128	PTK2
GO:BP,	regulation of cellular extravasation	GO:0002691	1	0	40	110	2	21128	SELP,GP1BA
GO:BP,	negative regulation of leukocyte activation	GO:0002695	1	0	194	110	3	21128	FGL1,PTPN6,PTPRC
GO:BP,	regulation of production of molecular mediator of immune response	GO:0002700	1	0	186	110	3	21128	RBP4,PTPRC,CD36
GO:BP,	positive regulation of production of molecular mediator of immune response	GO:0002702	1	0	132	110	3	21128	RBP4,PTPRC,CD36
GO:BP,	peptide secretion	GO:0002790	1	0	237	110	5	21128	FGB,FGG,FGA,S100A8,RBP4
GO:BP,	positive regulation of leukocyte mediated immunity	GO:0002705	1	0	136	110	3	21128	ITGB2,STX7,PTPRC
GO:BP,	positive regulation of lymphocyte mediated immunity	GO:0002708	1	0	115	110	2	21128	STX7,PTPRC
GO:BP,	regulation of T cell mediated immunity	GO:0002709	1	0	85	110	2	21128	STX7,PTPRC
GO:BP,	negative regulation of T cell mediated immunity	GO:0002710	1	0	26	110	1	21128	PTPRC
GO:BP,	positive regulation of T cell mediated immunity	GO:0002711	1	0	56	110	2	21128	STX7,PTPRC
GO:BP,	positive regulation of B cell mediated immunity	GO:0002714	1	0	41	110	1	21128	PTPRC
GO:BP,	regulation of cytokine production involved in immune response	GO:0002718	1	0	117	110	1	21128	CD36
GO:BP,	positive regulation of cytokine production involved in immune response	GO:0002720	1	0	79	110	1	21128	CD36
GO:BP,	cell surface pattern recognition receptor signaling pathway	GO:0002752	1	0	55	110	2	21128	LTF,COLEC11
GO:BP,	innate immune response-activating signaling pathway	GO:0002758	1	0	202	110	3	21128	LTF,CD36,COLEC11
GO:BP,	regulation of myeloid leukocyte differentiation	GO:0002761	1	0	121	110	2	21128	LTF,PF4
GO:BP,	negative regulation of myeloid leukocyte differentiation	GO:0002762	1	0	50	110	1	21128	LTF
GO:BP,	regulation of lymphocyte mediated immunity	GO:0002706	1	0	173	110	5	21128	C4BPA,PTPN6,STX7,PTPRC,C4BPB
GO:BP,	regulation of systemic arterial blood pressure by renin-angiotensin	GO:0003081	1	0	25	110	1	21128	SERPINF2
GO:BP,	endothelium development	GO:0003158	1	0	131	110	1	21128	PECAM1
GO:BP,	cardiac chamber development	GO:0003205	1	0	168	110	1	21128	RBP4
GO:BP,	thymine catabolic process	GO:0006210	1	0	3	110	1	21128	DPYD
GO:BP,	uracil catabolic process	GO:0006212	1	0	2	110	1	21128	DPYD
GO:BP,	pyrimidine nucleoside metabolic process	GO:0006213	1	0	24	110	2	21128	CDA,DPYD
GO:BP,	thymidine catabolic process	GO:0006214	1	0	1	110	1	21128	DPYD
GO:BP,	cytidine catabolic process	GO:0006216	1	0	12	110	1	21128	CDA
GO:BP,	pyrimidine nucleotide metabolic process	GO:0006220	1	0	60	110	2	21128	CDA,DPYD
GO:BP,	pyrimidine nucleotide biosynthetic process	GO:0006221	1	0	39	110	1	21128	CDA
GO:BP,	UMP biosynthetic process	GO:0006222	1	0	15	110	1	21128	CDA
GO:BP,	pyrimidine nucleotide catabolic process	GO:0006244	1	0	22	110	1	21128	DPYD
GO:BP,	CMP catabolic process	GO:0006248	1	0	5	110	1	21128	DPYD
GO:BP,	dCMP catabolic process	GO:0006249	1	0	6	110	1	21128	DPYD
GO:BP,	pyrimidine nucleobase catabolic process	GO:0006208	1	0	3	110	1	21128	DPYD
GO:BP,	DNA metabolic process	GO:0006259	1	0	1054	110	3	21128	VCP,H1-4,PTPRC
GO:BP,	postreplication repair	GO:0006301	1	0	35	110	1	21128	VCP
GO:BP,	double-strand break repair	GO:0006302	1	0	300	110	1	21128	VCP
GO:BP,	DNA recombination	GO:0006310	1	0	326	110	2	21128	H1-4,PTPRC
GO:BP,	chromatin organization	GO:0006325	1	0	665	110	3	21128	H1-4,WBP2,ASH1L
GO:BP,	nucleosome assembly	GO:0006334	1	0	123	110	1	21128	H1-4
GO:BP,	chromatin remodeling	GO:0006338	1	0	401	110	3	21128	H1-4,WBP2,ASH1L
GO:BP,	DNA-templated transcription	GO:0006351	1	0	3584	110	19	21128	LTF,SERPINF2,PDLIM1,S100A12,LIMS1,S100A8,PF4,ITGA6,H1-4,S100A9,ITGB2,WBP2,CD36,PITHD1,TGFB1I1,TSG101,RWDD1,ZNF578,ASH1L
GO:BP,	DNA-templated transcription elongation	GO:0006354	1	0	240	110	1	21128	TGFB1I1
GO:BP,	regulation of DNA-templated transcription	GO:0006355	1	0	3465	110	19	21128	LTF,SERPINF2,PDLIM1,S100A12,LIMS1,S100A8,PF4,ITGA6,H1-4,S100A9,ITGB2,WBP2,CD36,PITHD1,TGFB1I1,TSG101,RWDD1,ZNF578,ASH1L
GO:BP,	regulation of transcription by RNA polymerase II	GO:0006357	1	0	2572	110	11	21128	SERPINF2,PDLIM1,PF4,ITGA6,H1-4,WBP2,CD36,TSG101,RWDD1,ZNF578,ASH1L
GO:BP,	transcription by RNA polymerase II	GO:0006366	1	0	2674	110	11	21128	SERPINF2,PDLIM1,PF4,ITGA6,H1-4,WBP2,CD36,TSG101,RWDD1,ZNF578,ASH1L
GO:BP,	DNA repair	GO:0006281	1	0	591	110	1	21128	VCP
GO:BP,	pyrimidine nucleobase metabolic process	GO:0006206	1	0	15	110	2	21128	CDA,DPYD
GO:BP,	purine nucleotide biosynthetic process	GO:0006164	1	0	278	110	1	21128	VCP
GO:BP,	purine nucleotide metabolic process	GO:0006163	1	0	557	110	1	21128	VCP
GO:BP,	cardiac chamber morphogenesis	GO:0003206	1	0	124	110	1	21128	RBP4
GO:BP,	cardiac muscle hypertrophy	GO:0003300	1	0	80	110	1	21128	IL6ST
GO:BP,	regulation of extracellular matrix constituent secretion	GO:0003330	1	0	10	110	1	21128	CPB2
GO:BP,	positive regulation of extracellular matrix constituent secretion	GO:0003331	1	0	5	110	1	21128	CPB2
GO:BP,	cilium movement	GO:0003341	1	0	198	110	1	21128	ASH1L
GO:BP,	carbohydrate metabolic process	GO:0005975	1	0	601	110	4	21128	RBP4,MLEC,IL6ST,GUSB
GO:BP,	polysaccharide metabolic process	GO:0005976	1	0	107	110	1	21128	IL6ST
GO:BP,	glycogen metabolic process	GO:0005977	1	0	73	110	1	21128	IL6ST
GO:BP,	monosaccharide metabolic process	GO:0005996	1	0	249	110	1	21128	RBP4
GO:BP,	glucose metabolic process	GO:0006006	1	0	187	110	1	21128	RBP4
GO:BP,	aminoglycan metabolic process	GO:0006022	1	0	132	110	1	21128	GUSB
GO:BP,	aminoglycan catabolic process	GO:0006026	1	0	35	110	1	21128	GUSB
GO:BP,	glycosaminoglycan catabolic process	GO:0006027	1	0	29	110	1	21128	GUSB
GO:BP,	proteoglycan metabolic process	GO:0006029	1	0	96	110	1	21128	GUSB
GO:BP,	alcohol metabolic process	GO:0006066	1	0	366	110	1	21128	RBP4
GO:BP,	cellular glucan metabolic process	GO:0006073	1	0	74	110	1	21128	IL6ST
GO:BP,	organic acid metabolic process	GO:0006082	1	0	978	110	2	21128	CD36,DPYD
GO:BP,	generation of precursor metabolites and energy	GO:0006091	1	0	525	110	2	21128	VCP,IL6ST
GO:BP,	gluconeogenesis	GO:0006094	1	0	84	110	1	21128	RBP4
GO:BP,	energy reserve metabolic process	GO:0006112	1	0	86	110	1	21128	IL6ST
GO:BP,	oxidative phosphorylation	GO:0006119	1	0	160	110	1	21128	VCP
GO:BP,	nucleobase-containing compound metabolic process	GO:0006139	1	0	8125	110	25	21128	VCP,LTF,SERPINF2,PDLIM1,S100A12,AZGP1,LIMS1,ENDOD1,S100A8,CDA,PF4,ITGA6,H1-4,S100A9,ITGB2,WBP2,PTPRC,CD36,PITHD1,TGFB1I1,TSG101,RWDD1,DPYD,ZNF578,ASH1L
GO:BP,	regulation of nucleotide metabolic process	GO:0006140	1	0	99	110	2	21128	VCP,CDA
GO:BP,	purine nucleobase metabolic process	GO:0006144	1	0	20	110	1	21128	DPYD
GO:BP,	purine nucleobase catabolic process	GO:0006145	1	0	3	110	1	21128	DPYD
GO:BP,	regulation of acute inflammatory response	GO:0002673	1	0	47	110	2	21128	IL6ST,ASH1L
GO:BP,	positive regulation of immunoglobulin production	GO:0002639	1	0	52	110	2	21128	RBP4,PTPRC
GO:BP,	regulation of immunoglobulin production	GO:0002637	1	0	75	110	2	21128	RBP4,PTPRC
GO:BP,	myeloid leukocyte differentiation	GO:0002573	1	0	219	110	2	21128	LTF,PF4
GO:BP,	placenta development	GO:0001890	1	0	154	110	4	21128	PLG,GRB2,PTK2,ASH1L
GO:BP,	embryonic placenta development	GO:0001892	1	0	91	110	2	21128	PLG,GRB2
GO:BP,	maternal placenta development	GO:0001893	1	0	35	110	1	21128	ASH1L
[truncated: 1,846 more rows]

## Sheet: LPRF REACTOME
LPRF-CM	REACTOME CATEGORIES WITH P<0.05
source,	term_name	term_id	adjusted_p_value	negative_log10_of_adjusted_p_value	term_size	query_size	intersection_size	effective_domain_size	intersections
REAC,	Innate Immune System	REAC:R-HSA-168249	3.673114793984689e-18	17.4349654986585	1093	94	45	10777	FGB,FGG,FGA,C4A,VCP,IGHG2,C4BPA,HBB,LTF,IGHG4,BIN2,S100A12,LCN2,PPBP,CFHR1,IGLC2,MASP1,S100A8,PTPN6,CPB2,MMP8,MLEC,UNC13D,CDA,PECAM1,CFHR2,CPN1,IQGAP2,S100A9,GCA,ITGB2,LYZ,PTPRC,IGHV3-23,PTK2,IGHV3-7,STOM,CD36,COLEC11,C4BPB,FCGR3B,IGKV4-1,GUSB,GRAP2,PIK3C3
REAC,	Platelet degranulation	REAC:R-HSA-114608	7.266989464298198e-15	14.138645469447647	125	94	18	10777	A2M,FGB,VWF,FGG,FGA,PLG,HRG,SERPINF2,ITGB3,SELP,ITGA2B,PPBP,ENDOD1,MANF,PECAM1,PF4,RAB27B,CD36
REAC,	Response to elevated platelet cytosolic Ca2+	REAC:R-HSA-76005	1.498983974283624e-14	13.824203010192011	130	94	18	10777	A2M,FGB,VWF,FGG,FGA,PLG,HRG,SERPINF2,ITGB3,SELP,ITGA2B,PPBP,ENDOD1,MANF,PECAM1,PF4,RAB27B,CD36
REAC,	Hemostasis	REAC:R-HSA-109582	2.1536703736025825e-14	13.666820766163431	672	94	33	10777	A2M,FGB,VWF,FGG,FGA,PLG,IGHM,HBB,HRG,SERPINF2,ITGB3,SELP,ITGA2B,HBD,F13B,GP5,GP1BA,PPBP,ENDOD1,IGLC2,PTPN6,MANF,PECAM1,PF4,ITGA6,ITGB2,PF4V1,RAB27B,IGHV3-23,PTK2,IGHV3-7,CD36,IGKV4-1
REAC,	Platelet activation, signaling and aggregation	REAC:R-HSA-76002	1.2493562750874716e-13	12.90331369754201	258	94	22	10777	A2M,FGB,VWF,FGG,FGA,PLG,HRG,SERPINF2,ITGB3,SELP,ITGA2B,GP5,GP1BA,PPBP,ENDOD1,PTPN6,MANF,PECAM1,PF4,RAB27B,PTK2,CD36
REAC,	Immune System	REAC:R-HSA-168256	7.065013438145659e-12	11.150887007756406	2041	94	51	10777	FGB,FGG,FGA,C4A,LCP1,VCP,IGHM,IGHG2,C4BPA,HBB,LTF,IGHG4,BIN2,CA1,S100A12,LCN2,PPBP,CFHR1,IGLC2,MASP1,S100A8,PTPN6,CPB2,MMP8,MLEC,UNC13D,CDA,PECAM1,CFHR2,CANX,GRB2,CPN1,IQGAP2,S100A9,GCA,ITGB2,LYZ,PTPRC,IGHV3-23,PTK2,IGHV3-7,STOM,CD36,COLEC11,C4BPB,FCGR3B,IL6ST,IGKV4-1,GUSB,GRAP2,PIK3C3
REAC,	Complement cascade	REAC:R-HSA-166658	1.1448614516268537e-11	10.94124706741549	111	94	15	10777	C4A,IGHG2,C4BPA,IGHG4,CFHR1,IGLC2,MASP1,CPB2,CFHR2,CPN1,IGHV3-23,IGHV3-7,COLEC11,C4BPB,IGKV4-1
REAC,	Formation of Fibrin Clot (Clotting Cascade)	REAC:R-HSA-140877	3.304041496754809e-10	9.480954506842437	39	94	10	10777	A2M,FGB,VWF,FGG,FGA,F13B,GP5,GP1BA,PF4,PF4V1
REAC,	Neutrophil degranulation	REAC:R-HSA-6798695	5.789267831965532e-10	9.237376357972662	476	94	24	10777	VCP,HBB,LTF,BIN2,S100A12,LCN2,PPBP,S100A8,PTPN6,MMP8,MLEC,UNC13D,CDA,PECAM1,IQGAP2,S100A9,GCA,ITGB2,LYZ,PTPRC,STOM,CD36,FCGR3B,GUSB
REAC,	Regulation of Complement cascade	REAC:R-HSA-977606	1.2871170350591011e-9	8.890381961744055	101	94	13	10777	C4A,IGHG2,C4BPA,IGHG4,CFHR1,IGLC2,CPB2,CFHR2,CPN1,IGHV3-23,IGHV3-7,C4BPB,IGKV4-1
REAC,	GRB2:SOS provides linkage to MAPK signaling for Integrins	REAC:R-HSA-354194	4.0974316575605736e-9	8.387488281440648	14	94	7	10777	FGB,VWF,FGG,FGA,ITGB3,ITGA2B,PTK2
REAC,	p130Cas linkage to MAPK signaling for integrins	REAC:R-HSA-372708	7.628393068490194e-9	8.117566937141737	15	94	7	10777	FGB,VWF,FGG,FGA,ITGB3,ITGA2B,PTK2
REAC,	Platelet Aggregation (Plug Formation)	REAC:R-HSA-76009	1.0729066428300012e-8	7.969438065795169	38	94	9	10777	FGB,VWF,FGG,FGA,ITGB3,ITGA2B,GP5,GP1BA,PTK2
REAC,	Integrin signaling	REAC:R-HSA-354192	7.21283134131256e-7	6.14189422286243	26	94	7	10777	FGB,VWF,FGG,FGA,ITGB3,ITGA2B,PTK2
REAC,	MyD88 deficiency (TLR2/4)	REAC:R-HSA-5602498	0.000001759215839597478	5.7546808733364365	17	94	6	10777	FGB,FGG,FGA,S100A8,S100A9,CD36
REAC,	IRAK4 deficiency (TLR2/4)	REAC:R-HSA-5603041	0.0000026203578759591226	5.581639390764122	18	94	6	10777	FGB,FGG,FGA,S100A8,S100A9,CD36
REAC,	Cell surface interactions at the vascular wall	REAC:R-HSA-202733	0.000003735046888589719	5.4277039418196775	190	94	13	10777	IGHM,ITGB3,SELP,IGLC2,PTPN6,PECAM1,PF4,ITGA6,ITGB2,PF4V1,IGHV3-23,IGHV3-7,IGKV4-1
REAC,	Initial triggering of complement	REAC:R-HSA-166663	0.00000715054153575879	5.1456610662988025	76	94	9	10777	C4A,IGHG2,IGHG4,IGLC2,MASP1,IGHV3-23,IGHV3-7,COLEC11,IGKV4-1
REAC,	Regulation of TLR by endogenous ligand	REAC:R-HSA-5686938	0.000007499853588257211	5.124947214799318	21	94	6	10777	FGB,FGG,FGA,S100A8,S100A9,CD36
REAC,	Common Pathway of Fibrin Clot Formation	REAC:R-HSA-140875	0.000010240155465911007	4.989693449856795	22	94	6	10777	FGB,FGG,FGA,F13B,PF4,PF4V1
REAC,	Integrin cell surface interactions	REAC:R-HSA-216083	0.000017452132769407242	4.758151491719964	84	94	9	10777	FGB,VWF,FGG,FGA,ITGB3,ITGA2B,PECAM1,ITGA6,ITGB2
REAC,	Metal sequestration by antimicrobial proteins	REAC:R-HSA-6799990	0.00003292818104144394	4.48243225912964	6	94	4	10777	LTF,LCN2,S100A8,S100A9
REAC,	Creation of C4 and C2 activators	REAC:R-HSA-166786	0.00004886604877776792	4.310992775835475	68	94	8	10777	IGHG2,IGHG4,IGLC2,MASP1,IGHV3-23,IGHV3-7,COLEC11,IGKV4-1
REAC,	Diseases associated with the TLR signaling cascade	REAC:R-HSA-5602358	0.00009486475860353003	4.022895094069341	31	94	6	10777	FGB,FGG,FGA,S100A8,S100A9,CD36
REAC,	Diseases of Immune System	REAC:R-HSA-5260271	0.00009486475860353003	4.022895094069341	31	94	6	10777	FGB,FGG,FGA,S100A8,S100A9,CD36
REAC,	Signaling by high-kinase activity BRAF mutants	REAC:R-HSA-6802948	0.00020334658468142903	3.69176311741462	35	94	6	10777	FGB,VWF,FGG,FGA,ITGB3,ITGA2B
REAC,	MAP2K and MAPK activation	REAC:R-HSA-5674135	0.00039742963328856415	3.4007397540004884	39	94	6	10777	FGB,VWF,FGG,FGA,ITGB3,ITGA2B
REAC,	Signaling by RAF1 mutants	REAC:R-HSA-9656223	0.00046429748725921834	3.333203666694388	40	94	6	10777	FGB,VWF,FGG,FGA,ITGB3,ITGA2B
REAC,	Binding and Uptake of Ligands by Scavenger Receptors	REAC:R-HSA-2173782	0.0007771831753389127	3.109476609689033	97	94	8	10777	HBB,IGLC2,MASP1,IGHV3-23,IGHV3-7,CD36,COLEC11,IGKV4-1
REAC,	Paradoxical activation of RAF signaling by kinase inactive BRAF	REAC:R-HSA-6802955	0.000951307965700823	3.0216788667080707	45	94	6	10777	FGB,VWF,FGG,FGA,ITGB3,ITGA2B
REAC,	Signaling downstream of RAS mutants	REAC:R-HSA-9649948	0.000951307965700823	3.0216788667080707	45	94	6	10777	FGB,VWF,FGG,FGA,ITGB3,ITGA2B
REAC,	Signaling by RAS mutants	REAC:R-HSA-6802949	0.000951307965700823	3.0216788667080707	45	94	6	10777	FGB,VWF,FGG,FGA,ITGB3,ITGA2B
REAC,	Signaling by moderate kinase activity BRAF mutants	REAC:R-HSA-6802946	0.000951307965700823	3.0216788667080707	45	94	6	10777	FGB,VWF,FGG,FGA,ITGB3,ITGA2B
REAC,	Toll-like Receptor Cascades	REAC:R-HSA-168898	0.0030438226193748295	2.5165806599406593	154	94	9	10777	FGB,FGG,FGA,S100A12,S100A8,S100A9,ITGB2,CD36,PIK3C3
REAC,	Extracellular matrix organization	REAC:R-HSA-1474244	0.004131132213218397	2.3839309055917157	298	94	12	10777	A2M,FGB,VWF,FGG,FGA,PLG,ITGB3,ITGA2B,MMP8,PECAM1,ITGA6,ITGB2
REAC,	CD22 mediated BCR regulation	REAC:R-HSA-5690714	0.005264069263068966	2.2786784050379545	60	94	6	10777	IGHM,IGLC2,PTPN6,IGHV3-23,IGHV3-7,IGKV4-1
REAC,	Classical antibody-mediated complement activation	REAC:R-HSA-173623	0.005797605744389118	2.2367513213815022	61	94	6	10777	IGHG2,IGHG4,IGLC2,IGHV3-23,IGHV3-7,IGKV4-1
REAC,	Signaling by BRAF and RAF1 fusions	REAC:R-HSA-6802952	0.007665690717559058	2.115448706914052	64	94	6	10777	FGB,VWF,FGG,FGA,ITGB3,ITGA2B
REAC,	Toll Like Receptor 4 (TLR4) Cascade	REAC:R-HSA-166016	0.007719917558389666	2.1123873375046296	132	94	8	10777	FGB,FGG,FGA,S100A12,S100A8,S100A9,ITGB2,CD36
REAC,	FCGR activation	REAC:R-HSA-2029481	0.009991571046480735	2.0003662191640705	67	94	6	10777	IGHG2,IGHG4,IGLC2,IGHV3-23,IGHV3-7,IGKV4-1
REAC,	MyD88:MAL(TIRAP) cascade initiated on plasma membrane	REAC:R-HSA-166058	0.01039519690857676	1.9831672797333408	100	94	7	10777	FGB,FGG,FGA,S100A12,S100A8,S100A9,CD36
REAC,	Toll Like Receptor TLR6:TLR2 Cascade	REAC:R-HSA-168188	0.01039519690857676	1.9831672797333408	100	94	7	10777	FGB,FGG,FGA,S100A12,S100A8,S100A9,CD36
REAC,	Toll Like Receptor 2 (TLR2) Cascade	REAC:R-HSA-181438	0.012596824854235467	1.8997389090140628	103	94	7	10777	FGB,FGG,FGA,S100A12,S100A8,S100A9,CD36
REAC,	Toll Like Receptor TLR1:TLR2 Cascade	REAC:R-HSA-168179	0.012596824854235467	1.8997389090140628	103	94	7	10777	FGB,FGG,FGA,S100A12,S100A8,S100A9,CD36
REAC,	Intrinsic Pathway of Fibrin Clot Formation	REAC:R-HSA-140837	0.017348356912039304	1.7607416515835301	23	94	4	10777	A2M,VWF,GP5,GP1BA
REAC,	Erythrocytes take up oxygen and release carbon dioxide	REAC:R-HSA-1247673	0.02129956417547796	1.6716292828580435	9	94	3	10777	HBB,CA2,CA1
REAC,	Leishmania phagocytosis	REAC:R-HSA-9664417	0.02287878576270229	1.6405670284171008	113	94	7	10777	IGHG2,IGHG4,IGLC2,IGHV3-23,PTK2,IGHV3-7,IGKV4-1
REAC,	Parasite infection	REAC:R-HSA-9664407	0.02287878576270229	1.6405670284171008	113	94	7	10777	IGHG2,IGHG4,IGLC2,IGHV3-23,PTK2,IGHV3-7,IGKV4-1
REAC,	FCGR3A-mediated phagocytosis	REAC:R-HSA-9664422	0.02287878576270229	1.6405670284171008	113	94	7	10777	IGHG2,IGHG4,IGLC2,IGHV3-23,PTK2,IGHV3-7,IGKV4-1
REAC,	Regulation of actin dynamics for phagocytic cup formation	REAC:R-HSA-2029482	0.027043188300074524	1.5679421078671478	116	94	7	10777	IGHG2,IGHG4,IGLC2,IGHV3-23,PTK2,IGHV3-7,IGKV4-1
REAC,	Role of phospholipids in phagocytosis	REAC:R-HSA-2029485	0.029462980428206106	1.5307233227326098	81	94	6	10777	IGHG2,IGHG4,IGLC2,IGHV3-23,IGHV3-7,IGKV4-1
REAC,	Oncogenic MAPK signaling	REAC:R-HSA-6802957	0.031567643126025086	1.5007578417875922	82	94	6	10777	FGB,VWF,FGG,FGA,ITGB3,ITGA2B
REAC,	Antigen activates B Cell Receptor (BCR) leading to generation of second messengers	REAC:R-HSA-983695	0.03613644564061792	1.442054566622335	84	94	6	10777	IGHM,IGLC2,PTPN6,IGHV3-23,IGHV3-7,IGKV4-1
REAC,	GP1b-IX-V activation signalling	REAC:R-HSA-430116	0.04131124963797704	1.383931667703893	11	94	3	10777	VWF,GP5,GP1BA
REAC,	PECAM1 interactions	REAC:R-HSA-210990	0.04131124963797704	1.383931667703893	11	94	3	10777	ITGB3,PTPN6,PECAM1
REAC,	Disease	REAC:R-HSA-1643685	0.04222181514673746	1.3744630999893594	1823	94	31	10777	FGB,VWF,FGG,FGA,VCP,IGHG2,LTF,IGHG4,ITGB3,ITGA2B,BIN2,GP5,GP1BA,CORO1A,IGLC2,MASP1,S100A8,RBP4,PTPN6,CANX,GRB2,S100A9,IGHV3-23,PTK2,IGHV3-7,CD36,IGKV4-1,GUSB,TSG101,PIK3C3,VPS4A

## Sheet: LPRF GO-BP
LPRF-CM	GO BP CATEGORIES WITH P<0.05
source,	term_name	term_id	adjusted_p_value	negative_log10_of_adjusted_p_value	term_size	query_size	intersection_size	effective_domain_size	intersections
GO:BP,	humoral immune response	GO:0006959	3.4087111294112877e-26	25.467409801416558	320	110	30	21128	A2M,FGB,FGA,C4A,IGHM,IGHG2,C4BPA,LTF,HRG,IGHG4,S100A12,PPBP,CFHR1,IGLC2,MASP1,PTPN6,CFHR2,PF4,S100A9,PF4V1,LYZ,PTPRC,IGHV3-23,IGHV3-7,COLEC11,C4BPB,IGHV5-51,IGHV2-26,IGHV2-70D,MASP2
GO:BP,	immune system process	GO:0002376	6.033784791814377e-19	18.21941018395126	2683	110	56	21128	A2M,FGB,FGA,C4A,PLG,LCP1,IGHM,IGHG2,C4BPA,LTF,HRG,IGHG4,ITGB3,SELP,S100A12,LCN2,FGL1,AZGP1,GP1BA,PPBP,ENDOD1,CORO1A,CFHR1,IGLC2,MASP1,S100A8,RBP4,PTPN6,MMP8,UNC13D,PECAM1,CFHR2,PF4,ITGA6,SKAP2,S100A9,ITGB2,PF4V1,LYZ,STX7,PTPRC,IGHV3-23,PTK2,IGHV3-7,CD36,COLEC11,C4BPB,IGHV5-51,PITHD1,FCGR3B,IL6ST,IGKV4-1,IGHV2-26,IGHV2-70D,MASP2,IGLV3-10
GO:BP,	complement activation	GO:0006956	1.2563802324429076e-17	16.900878905295265	131	110	18	21128	A2M,C4A,IGHM,IGHG2,C4BPA,IGHG4,CFHR1,IGLC2,MASP1,CFHR2,IGHV3-23,IGHV3-7,COLEC11,C4BPB,IGHV5-51,IGHV2-26,IGHV2-70D,MASP2
GO:BP,	biological process involved in interspecies interaction between organisms	GO:0044419	7.515975767042726e-17	16.12401462881853	1724	110	44	21128	A2M,FGB,FGA,C4A,PLG,IGHM,IGHG2,C4BPA,LTF,HRG,IGHG4,ITGB3,SELP,S100A12,LCN2,PPBP,ENDOD1,CORO1A,CFHR1,IGLC2,MASP1,S100A8,PTPN6,UNC13D,CFHR2,PF4,S100A9,PF4V1,LYZ,PTPRC,IGHV3-23,PTK2,IGHV3-7,STOM,CD36,COLEC11,C4BPB,IGHV5-51,IGHV2-26,IGHV2-70D,TSG101,MASP2,PIK3C3,VPS4A
GO:BP,	defense response to other organism	GO:0098542	8.271175259728066e-17	16.082432776717013	1221	110	38	21128	A2M,FGB,FGA,C4A,IGHM,IGHG2,C4BPA,LTF,HRG,IGHG4,SELP,S100A12,LCN2,PPBP,ENDOD1,CORO1A,CFHR1,IGLC2,MASP1,S100A8,PTPN6,UNC13D,CFHR2,PF4,S100A9,PF4V1,LYZ,PTPRC,IGHV3-23,PTK2,IGHV3-7,CD36,COLEC11,C4BPB,IGHV5-51,IGHV2-26,IGHV2-70D,MASP2
GO:BP,	defense response	GO:0006952	3.288815502983119e-16	15.482960489023817	1791	110	44	21128	A2M,FGB,FGA,C4A,IGHM,IGHG2,C4BPA,LTF,HRG,SERPINF2,IGHG4,SELP,S100A12,LCN2,PPBP,ENDOD1,CORO1A,CFHR1,IGLC2,MASP1,S100A8,PTPN6,LSP1,MMP8,UNC13D,CFHR2,PF4,S100A9,ITGB2,PF4V1,LYZ,PTPRC,IGHV3-23,PTK2,IGHV3-7,CD36,COLEC11,C4BPB,IGHV5-51,IL6ST,IGHV2-26,IGHV2-70D,MASP2,ASH1L
GO:BP,	blood coagulation	GO:0007596	6.827647347710399e-16	15.165728918561786	228	110	20	21128	FGB,VWF,FGG,FGA,PLG,HBB,HRG,SERPINF2,ITGB3,SELP,F13B,GP5,GP1BA,PTPN6,CPB2,PF4,PF4V1,CD36,C4BPB,IL6ST
GO:BP,	immune response	GO:0006955	7.039453178022455e-16	15.152461075373646	1922	110	45	21128	A2M,FGB,FGA,C4A,LCP1,IGHM,IGHG2,C4BPA,LTF,HRG,IGHG4,S100A12,LCN2,FGL1,PPBP,ENDOD1,CORO1A,CFHR1,IGLC2,MASP1,S100A8,PTPN6,UNC13D,CFHR2,PF4,S100A9,ITGB2,PF4V1,LYZ,STX7,PTPRC,IGHV3-23,PTK2,IGHV3-7,CD36,COLEC11,C4BPB,IGHV5-51,FCGR3B,IL6ST,IGKV4-1,IGHV2-26,IGHV2-70D,MASP2,IGLV3-10
GO:BP,	coagulation	GO:0050817	1.0520212483281094e-15	14.977975488377664	233	110	20	21128	FGB,VWF,FGG,FGA,PLG,HBB,HRG,SERPINF2,ITGB3,SELP,F13B,GP5,GP1BA,PTPN6,CPB2,PF4,PF4V1,CD36,C4BPB,IL6ST
GO:BP,	hemostasis	GO:0007599	1.1456341527458113e-15	14.940954047997149	234	110	20	21128	FGB,VWF,FGG,FGA,PLG,HBB,HRG,SERPINF2,ITGB3,SELP,F13B,GP5,GP1BA,PTPN6,CPB2,PF4,PF4V1,CD36,C4BPB,IL6ST
GO:BP,	phagocytosis	GO:0006909	1.1840610783631635e-15	14.926625894478033	313	110	22	21128	C4A,IGHM,IGHG2,C4BPA,IGHG4,ITGB3,BIN2,CORO1A,IGLC2,UNC13D,PECAM1,ITGB2,PTPRC,IGHV3-23,PTK2,IGHV3-7,CD36,COLEC11,C4BPB,IGHV5-51,IGHV2-26,IGHV2-70D
GO:BP,	response to stress	GO:0006950	3.5265532308681003e-15	14.452649556396777	3980	110	62	21128	A2M,FGB,VWF,FGG,FGA,C4A,PLG,VCP,IGHM,IGHG2,C4BPA,HBB,LTF,HRG,SERPINF2,IGHG4,ITGB3,SELP,PDLIM1,F13B,S100A12,LCN2,GP5,GP1BA,PPBP,ENDOD1,CORO1A,CFHR1,IGLC2,MASP1,S100A8,PTPN6,LSP1,CPB2,MANF,MMP8,UNC13D,CFHR2,CANX,PF4,GRB2,S100A9,ITGB2,PF4V1,LYZ,PTPRC,IGHV3-23,PTK2,IGHV3-7,CD36,COLEC11,C4BPB,IGHV5-51,GPX3,IL6ST,IGHV2-26,IGHV2-70D,MASP2,RWDD1,PIK3C3,VPS4A,ASH1L
GO:BP,	positive regulation of immune system process	GO:0002684	5.243636866577955e-15	14.280367391791648	1060	110	34	21128	A2M,C4A,IGHM,IGHG2,C4BPA,LTF,HRG,IGHG4,ITGB3,SELP,CORO1A,CFHR1,IGLC2,MASP1,RBP4,PTPN6,MMP8,UNC13D,CFHR2,PF4,ITGB2,STX7,PTPRC,IGHV3-23,PTK2,IGHV3-7,CD36,COLEC11,C4BPB,IGHV5-51,IL6ST,IGHV2-26,IGHV2-70D,MASP2
GO:BP,	response to stimulus	GO:0050896	1.2066546368332821e-14	13.918417013896137	9039	110	91	21128	A2M,FGB,VWF,FGG,FGA,C4A,PLG,LCP1,VCP,IGHM,IGHG2,C4BPA,HBB,LTF,HRG,SERPINF2,IGHG4,ITGB3,SELP,ITGA2B,BIN2,ARHGDIB,PDLIM1,CA2,HBD,RSU1,F13B,S100A12,LCN2,FGL1,AZGP1,GP5,GP1BA,PPBP,LIMS1,ENDOD1,CORO1A,CFHR1,IGLC2,MASP1,S100A8,RBP4,PTPN6,LSP1,CPB2,MANF,MMP8,UNC13D,CDA,PECAM1,CFHR2,CANX,PF4,ITGA6,GRB2,CPN1,IQGAP2,APOM,SKAP2,S100A9,ITGB2,PF4V1,LYZ,STX7,WBP2,RGS10,PTPRC,IGHV3-23,PTK2,S100A4,IGHV3-7,CD36,C…
GO:BP,	immune effector process	GO:0002252	1.8693864562940708e-14	13.728300908098667	684	110	28	21128	A2M,C4A,LCP1,IGHM,IGHG2,C4BPA,IGHG4,CORO1A,CFHR1,IGLC2,MASP1,RBP4,PTPN6,UNC13D,CFHR2,ITGB2,STX7,PTPRC,IGHV3-23,PTK2,IGHV3-7,CD36,COLEC11,C4BPB,IGHV5-51,IGHV2-26,IGHV2-70D,MASP2
GO:BP,	response to external stimulus	GO:0009605	2.1536766843531955e-14	13.66681949358236	2861	110	52	21128	A2M,FGB,FGG,FGA,C4A,PLG,IGHM,IGHG2,C4BPA,LTF,HRG,SERPINF2,IGHG4,ITGB3,SELP,BIN2,S100A12,LCN2,GP1BA,PPBP,ENDOD1,CORO1A,CFHR1,IGLC2,MASP1,S100A8,PTPN6,LSP1,CPB2,MMP8,UNC13D,CDA,CFHR2,PF4,S100A9,ITGB2,PF4V1,LYZ,PTPRC,IGHV3-23,PTK2,IGHV3-7,CD36,COLEC11,C4BPB,IGHV5-51,IL6ST,IGHV2-26,IGHV2-70D,MASP2,PIK3C3,ASH1L
GO:BP,	response to external biotic stimulus	GO:0043207	4.477401933518984e-14	13.348973917527612	1560	110	39	21128	A2M,FGB,FGA,C4A,IGHM,IGHG2,C4BPA,LTF,HRG,IGHG4,SELP,S100A12,LCN2,PPBP,ENDOD1,CORO1A,CFHR1,IGLC2,MASP1,S100A8,PTPN6,UNC13D,CDA,CFHR2,PF4,S100A9,PF4V1,LYZ,PTPRC,IGHV3-23,PTK2,IGHV3-7,CD36,COLEC11,C4BPB,IGHV5-51,IGHV2-26,IGHV2-70D,MASP2
GO:BP,	regulation of immune system process	GO:0002682	7.335218574465086e-14	13.134586940543294	1493	110	38	21128	A2M,C4A,IGHM,IGHG2,C4BPA,LTF,HRG,IGHG4,ITGB3,SELP,FGL1,GP1BA,CORO1A,CFHR1,IGLC2,MASP1,RBP4,PTPN6,MMP8,UNC13D,CFHR2,PF4,ITGB2,STX7,PTPRC,IGHV3-23,PTK2,IGHV3-7,CD36,COLEC11,C4BPB,IGHV5-51,PITHD1,FCGR3B,IL6ST,IGHV2-26,IGHV2-70D,MASP2
GO:BP,	humoral immune response mediated by circulating immunoglobulin	GO:0002455	8.969054134585192e-14	13.047253354702832	118	110	15	21128	C4A,IGHM,IGHG2,C4BPA,IGHG4,IGLC2,PTPN6,PTPRC,IGHV3-23,IGHV3-7,C4BPB,IGHV5-51,IGHV2-26,IGHV2-70D,MASP2
GO:BP,	response to biotic stimulus	GO:0009607	1.0126587550183746e-13	12.994536878213255	1598	110	39	21128	A2M,FGB,FGA,C4A,IGHM,IGHG2,C4BPA,LTF,HRG,IGHG4,SELP,S100A12,LCN2,PPBP,ENDOD1,CORO1A,CFHR1,IGLC2,MASP1,S100A8,PTPN6,UNC13D,CDA,CFHR2,PF4,S100A9,PF4V1,LYZ,PTPRC,IGHV3-23,PTK2,IGHV3-7,CD36,COLEC11,C4BPB,IGHV5-51,IGHV2-26,IGHV2-70D,MASP2
GO:BP,	wound healing	GO:0042060	1.2256646003154972e-13	12.911628357028391	440	110	23	21128	FGB,VWF,FGG,FGA,PLG,HBB,HRG,SERPINF2,ITGB3,SELP,F13B,GP5,GP1BA,S100A8,PTPN6,CPB2,PF4,PF4V1,PTK2,CD36,C4BPB,IL6ST,VPS4A
GO:BP,	regulation of immune response	GO:0050776	2.92787057285439e-13	12.533448125269897	901	110	30	21128	A2M,C4A,IGHM,IGHG2,C4BPA,LTF,HRG,IGHG4,FGL1,CFHR1,IGLC2,MASP1,PTPN6,UNC13D,CFHR2,ITGB2,STX7,PTPRC,IGHV3-23,PTK2,IGHV3-7,CD36,COLEC11,C4BPB,IGHV5-51,FCGR3B,IL6ST,IGHV2-26,IGHV2-70D,MASP2
GO:BP,	response to other organism	GO:0051707	2.9350995962867364e-13	12.532377157317944	1557	110	38	21128	A2M,FGB,FGA,C4A,IGHM,IGHG2,C4BPA,LTF,HRG,IGHG4,SELP,S100A12,LCN2,PPBP,ENDOD1,CORO1A,CFHR1,IGLC2,MASP1,S100A8,PTPN6,UNC13D,CFHR2,PF4,S100A9,PF4V1,LYZ,PTPRC,IGHV3-23,PTK2,IGHV3-7,CD36,COLEC11,C4BPB,IGHV5-51,IGHV2-26,IGHV2-70D,MASP2
GO:BP,	positive regulation of response to stimulus	GO:0048584	4.076763386149779e-13	12.389684494108677	2267	110	45	21128	A2M,FGB,VWF,FGG,FGA,C4A,PLG,VCP,IGHM,IGHG2,C4BPA,LTF,HRG,SERPINF2,IGHG4,ITGB3,SELP,S100A12,LIMS1,CFHR1,IGLC2,MASP1,S100A8,PTPN6,CPB2,MMP8,CFHR2,S100A9,ITGB2,STX7,WBP2,PTPRC,IGHV3-23,PTK2,S100A4,IGHV3-7,CD36,COLEC11,C4BPB,IGHV5-51,TGFB1I1,IL6ST,IGHV2-26,IGHV2-70D,MASP2
GO:BP,	regulation of response to stimulus	GO:0048583	6.760053577632021e-13	12.170049861990652	3998	110	59	21128	A2M,FGB,VWF,FGG,FGA,C4A,PLG,VCP,IGHM,IGHG2,C4BPA,LTF,HRG,SERPINF2,IGHG4,ITGB3,SELP,ARHGDIB,S100A12,FGL1,GP1BA,LIMS1,CFHR1,IGLC2,MASP1,S100A8,PTPN6,CPB2,MANF,MMP8,UNC13D,CFHR2,PF4,ITGA6,GRB2,S100A9,ITGB2,STX7,WBP2,RGS10,PTPRC,IGHV3-23,PTK2,S100A4,IGHV3-7,CD36,COLEC11,C4BPB,IGHV5-51,TGFB1I1,FCGR3B,IL6ST,IGHV2-26,IGHV2-70D,TSG101,MASP2,GRAP2,RWDD1,ASH1L
GO:BP,	positive regulation of immune response	GO:0050778	7.242428943335769e-13	12.140115757038052	721	110	27	21128	A2M,C4A,IGHM,IGHG2,C4BPA,LTF,HRG,IGHG4,CFHR1,IGLC2,MASP1,PTPN6,CFHR2,ITGB2,STX7,PTPRC,IGHV3-23,PTK2,IGHV3-7,CD36,COLEC11,C4BPB,IGHV5-51,IL6ST,IGHV2-26,IGHV2-70D,MASP2
GO:BP,	cell activation	GO:0001775	3.0940368150251786e-12	11.509474523064846	1142	110	32	21128	FGB,VWF,FGG,FGA,LCP1,IGHM,IGHG2,HBB,HRG,IGHG4,ITGB3,SELP,S100A12,FGL1,GP5,GP1BA,CORO1A,IGLC2,PTPN6,MMP8,UNC13D,PF4,SKAP2,ITGB2,PF4V1,PTPRC,IGHV3-23,IGHV3-7,IGHV5-51,IL6ST,IGHV2-26,IGHV2-70D
GO:BP,	regulation of body fluid levels	GO:0050878	7.32135316211236e-12	11.135408643459733	367	110	20	21128	FGB,VWF,FGG,FGA,PLG,HBB,HRG,SERPINF2,ITGB3,SELP,F13B,GP5,GP1BA,PTPN6,CPB2,PF4,PF4V1,CD36,C4BPB,IL6ST
GO:BP,	activation of immune response	GO:0002253	8.66802061997927e-12	11.062080064226636	536	110	23	21128	A2M,C4A,IGHM,IGHG2,C4BPA,LTF,IGHG4,CFHR1,IGLC2,MASP1,PTPN6,CFHR2,PTPRC,IGHV3-23,PTK2,IGHV3-7,CD36,COLEC11,C4BPB,IGHV5-51,IGHV2-26,IGHV2-70D,MASP2
GO:BP,	phagocytosis, recognition	GO:0006910	1.1732347870862819e-11	10.93061506841938	102	110	13	21128	IGHM,IGHG2,C4BPA,IGHG4,IGLC2,IGHV3-23,IGHV3-7,CD36,COLEC11,C4BPB,IGHV5-51,IGHV2-26,IGHV2-70D
GO:BP,	defense response to bacterium	GO:0042742	1.3488350062608589e-11	10.870041171345786	379	110	20	21128	FGB,FGA,IGHM,IGHG2,LTF,IGHG4,SELP,S100A12,LCN2,PPBP,IGLC2,S100A8,S100A9,LYZ,IGHV3-23,IGHV3-7,CD36,IGHV5-51,IGHV2-26,IGHV2-70D
GO:BP,	platelet activation	GO:0030168	1.7287833286436243e-11	10.762259434181843	134	110	14	21128	FGB,VWF,FGG,FGA,HBB,HRG,ITGB3,SELP,GP5,GP1BA,PTPN6,PF4,PF4V1,IL6ST
GO:BP,	complement activation, classical pathway	GO:0006958	1.7289901494995063e-11	10.76220748100612	105	110	13	21128	C4A,IGHM,IGHG2,C4BPA,IGHG4,IGLC2,IGHV3-23,IGHV3-7,C4BPB,IGHV5-51,IGHV2-26,IGHV2-70D,MASP2
GO:BP,	innate immune response	GO:0045087	2.0932127055778588e-11	10.67918663780319	978	110	29	21128	A2M,FGB,FGA,C4A,IGHM,IGHG2,C4BPA,LTF,IGHG4,S100A12,LCN2,ENDOD1,CORO1A,IGLC2,MASP1,S100A8,PTPN6,UNC13D,S100A9,IGHV3-23,PTK2,IGHV3-7,CD36,COLEC11,C4BPB,IGHV5-51,IGHV2-26,IGHV2-70D,MASP2
GO:BP,	response to wounding	GO:0009611	3.7101055737420034e-11	10.430613732045	574	110	23	21128	FGB,VWF,FGG,FGA,PLG,HBB,HRG,SERPINF2,ITGB3,SELP,F13B,GP5,GP1BA,S100A8,PTPN6,CPB2,PF4,PF4V1,PTK2,CD36,C4BPB,IL6ST,VPS4A
GO:BP,	vesicle-mediated transport	GO:0016192	5.997552887698852e-11	10.222025913642	1638	110	36	21128	FGB,FGG,FGA,C4A,VCP,IGHM,IGHG2,C4BPA,IGHG4,ITGB3,BIN2,CORO1A,IGLC2,UNC13D,PECAM1,CANX,GRB2,ITGB2,STX7,RAB27B,PTPRC,IGHV3-23,PTK2,IGHV3-7,CD36,COLEC11,C4BPB,IGHV5-51,RP2,RUFY1,ITSN2,IGHV2-26,IGHV2-70D,TSG101,PIK3C3,VPS4A
GO:BP,	positive regulation of biological process	GO:0048518	1.3892503805619705e-10	9.857219475574837	6348	110	71	21128	A2M,FGB,VWF,FGG,FGA,C4A,PLG,LCP1,VCP,IGHM,IGHG2,C4BPA,HBB,LTF,HRG,SERPINF2,IGHG4,ITGB3,SELP,PDLIM1,CA2,HBD,RSU1,S100A12,LCN2,GP5,GP1BA,PPBP,LIMS1,CORO1A,CFHR1,IGLC2,MASP1,S100A8,RBP4,PTPN6,CPB2,MMP8,UNC13D,PECAM1,CFHR2,PF4,ITGA6,GRB2,PTPA,S100A9,ITGB2,STX7,WBP2,RAB27B,PTPRC,IGHV3-23,PTK2,S100A4,IGHV3-7,STOM,CD36,COLEC11,C4BPB,IGHV5-51,PITHD1,TGFB1I1,IL6ST,ITSN2,IGHV2-26,IGHV2-70D,TSG101,MASP2,ASA…
GO:BP,	immunoglobulin mediated immune response	GO:0016064	1.902444747250402e-10	9.720687947599552	196	110	15	21128	C4A,IGHM,IGHG2,C4BPA,IGHG4,IGLC2,PTPN6,PTPRC,IGHV3-23,IGHV3-7,C4BPB,IGHV5-51,IGHV2-26,IGHV2-70D,MASP2
GO:BP,	B cell mediated immunity	GO:0019724	2.3791466930986934e-10	9.623578779467902	199	110	15	21128	C4A,IGHM,IGHG2,C4BPA,IGHG4,IGLC2,PTPN6,PTPRC,IGHV3-23,IGHV3-7,C4BPB,IGHV5-51,IGHV2-26,IGHV2-70D,MASP2
GO:BP,	lymphocyte mediated immunity	GO:0002449	4.5696957860234814e-10	9.34011271083801	347	110	18	21128	C4A,IGHM,IGHG2,C4BPA,IGHG4,CORO1A,IGLC2,PTPN6,UNC13D,STX7,PTPRC,IGHV3-23,IGHV3-7,C4BPB,IGHV5-51,IGHV2-26,IGHV2-70D,MASP2
GO:BP,	endocytosis	GO:0006897	6.890683951274405e-10	9.161737669018011	660	110	23	21128	IGHM,IGHG2,C4BPA,IGHG4,ITGB3,BIN2,IGLC2,CANX,GRB2,ITGB2,RAB27B,IGHV3-23,IGHV3-7,CD36,COLEC11,C4BPB,IGHV5-51,RUFY1,ITSN2,IGHV2-26,IGHV2-70D,TSG101,PIK3C3
GO:BP,	fibrinolysis	GO:0042730	1.5782608306858221e-9	8.801821221680033	27	110	8	21128	FGB,FGG,FGA,PLG,HRG,SERPINF2,GP1BA,CPB2
GO:BP,	response to bacterium	GO:0009617	2.2617598885375955e-9	8.645553502247951	772	110	24	21128	FGB,FGA,IGHM,IGHG2,C4BPA,LTF,IGHG4,SELP,S100A12,LCN2,PPBP,IGLC2,S100A8,PF4,S100A9,PF4V1,LYZ,IGHV3-23,IGHV3-7,CD36,C4BPB,IGHV5-51,IGHV2-26,IGHV2-70D
GO:BP,	leukocyte mediated immunity	GO:0002443	2.826815020617639e-9	8.548702609675829	444	110	19	21128	C4A,IGHM,IGHG2,C4BPA,IGHG4,CORO1A,IGLC2,PTPN6,UNC13D,ITGB2,STX7,PTPRC,IGHV3-23,IGHV3-7,C4BPB,IGHV5-51,IGHV2-26,IGHV2-70D,MASP2
GO:BP,	adaptive immune response	GO:0002250	4.012811010883986e-9	8.396551293508862	719	110	23	21128	FGB,FGA,C4A,IGHM,IGHG2,C4BPA,IGHG4,FGL1,IGLC2,PTPN6,UNC13D,STX7,PTPRC,IGHV3-23,IGHV3-7,C4BPB,IGHV5-51,IL6ST,IGKV4-1,IGHV2-26,IGHV2-70D,MASP2,IGLV3-10
GO:BP,	antimicrobial humoral response	GO:0019730	4.718561675773081e-9	8.326190363965475	126	110	12	21128	FGB,FGA,IGHM,LTF,HRG,S100A12,PPBP,PF4,S100A9,PF4V1,LYZ,COLEC11
GO:BP,	phagocytosis, engulfment	GO:0006911	5.188565217017883e-9	8.284952720085785	127	110	12	21128	IGHM,IGHG2,IGHG4,BIN2,IGLC2,ITGB2,IGHV3-23,IGHV3-7,CD36,IGHV5-51,IGHV2-26,IGHV2-70D
GO:BP,	adaptive immune response based on somatic recombination of immune receptors built from immunoglobulin superfamily domains	GO:0002460	8.017246273259179e-9	8.09597477556754	355	110	17	21128	C4A,IGHM,IGHG2,C4BPA,IGHG4,IGLC2,PTPN6,UNC13D,STX7,PTPRC,IGHV3-23,IGHV3-7,C4BPB,IGHV5-51,IGHV2-26,IGHV2-70D,MASP2
GO:BP,	plasma membrane invagination	GO:0099024	1.1773974309114344e-8	7.929076916156094	136	110	12	21128	IGHM,IGHG2,IGHG4,BIN2,IGLC2,ITGB2,IGHV3-23,IGHV3-7,CD36,IGHV5-51,IGHV2-26,IGHV2-70D
GO:BP,	membrane invagination	GO:0010324	2.139587385231253e-8	7.669669971321332	143	110	12	21128	IGHM,IGHG2,IGHG4,BIN2,IGLC2,ITGB2,IGHV3-23,IGHV3-7,CD36,IGHV5-51,IGHV2-26,IGHV2-70D
GO:BP,	regulation of cell activation	GO:0050865	2.6199928278840983e-8	7.581699897540798	713	110	22	21128	FGG,IGHM,IGHG2,HRG,IGHG4,SELP,FGL1,GP5,GP1BA,CORO1A,IGLC2,PTPN6,MMP8,UNC13D,ITGB2,PTPRC,IGHV3-23,IGHV3-7,IGHV5-51,IL6ST,IGHV2-26,IGHV2-70D
GO:BP,	cell recognition	GO:0008037	2.9819750800861126e-8	7.525495990201036	230	110	14	21128	IGHM,IGHG2,C4BPA,IGHG4,IGLC2,PECAM1,IGHV3-23,IGHV3-7,CD36,COLEC11,C4BPB,IGHV5-51,IGHV2-26,IGHV2-70D
GO:BP,	cell adhesion	GO:0007155	4.217228320734626e-8	7.37497288564606	1521	110	31	21128	FGB,VWF,FGG,FGA,PLG,HBB,HRG,SERPINF2,ITGB3,SELP,ITGA2B,PDLIM1,RSU1,FGL1,AZGP1,GP5,GP1BA,LIMS1,CORO1A,S100A8,PTPN6,UNC13D,PECAM1,ITGA6,S100A9,ITGB2,PTPRC,PTK2,CD36,TGFB1I1,IL6ST
GO:BP,	positive regulation of cell activation	GO:0050867	5.08709315994467e-8	7.293530309060322	460	110	18	21128	IGHM,IGHG2,IGHG4,SELP,GP5,GP1BA,CORO1A,IGLC2,PTPN6,MMP8,ITGB2,PTPRC,IGHV3-23,IGHV3-7,IGHV5-51,IL6ST,IGHV2-26,IGHV2-70D
GO:BP,	B cell receptor signaling pathway	GO:0050853	1.2400278515342188e-7	6.906568560296003	128	110	11	21128	IGHM,IGHG2,IGHG4,IGLC2,PTPN6,PTPRC,IGHV3-23,IGHV3-7,IGHV5-51,IGHV2-26,IGHV2-70D
GO:BP,	positive regulation of multicellular organismal process	GO:0051240	1.3342933694215122e-7	6.87474867213364	1695	110	32	21128	FGB,FGG,FGA,PLG,IGHM,IGHG2,LTF,HRG,SERPINF2,IGHG4,ITGB3,SELP,LCN2,GP5,GP1BA,CORO1A,IGLC2,PTPN6,CPB2,MMP8,PF4,ITGB2,PTPRC,IGHV3-23,PTK2,IGHV3-7,CD36,IGHV5-51,TGFB1I1,IL6ST,IGHV2-26,IGHV2-70D
GO:BP,	cell-substrate adhesion	GO:0031589	1.4569312137806952e-7	6.8365609521288935	367	110	16	21128	FGB,VWF,FGG,FGA,PLG,HRG,ITGB3,ITGA2B,RSU1,LIMS1,CORO1A,UNC13D,ITGA6,ITGB2,PTK2,CD36
GO:BP,	regulation of blood coagulation	GO:0030193	1.862443154604144e-7	6.729916973891614	70	110	9	21128	FGB,FGG,FGA,PLG,HRG,SERPINF2,GP1BA,CPB2,CD36
GO:BP,	regulation of hemostasis	GO:1900046	2.4165478156315327e-7	6.616804607163017	72	110	9	21128	FGB,FGG,FGA,PLG,HRG,SERPINF2,GP1BA,CPB2,CD36
GO:BP,	positive regulation of cellular process	GO:0048522	3.407235155773268e-7	6.4675978918708035	5657	110	61	21128	FGB,VWF,FGG,FGA,LCP1,VCP,IGHM,IGHG2,HBB,LTF,HRG,SERPINF2,IGHG4,ITGB3,SELP,PDLIM1,CA2,HBD,RSU1,S100A12,GP5,GP1BA,PPBP,LIMS1,CORO1A,IGLC2,S100A8,RBP4,PTPN6,CPB2,MMP8,UNC13D,PECAM1,PF4,ITGA6,GRB2,PTPA,S100A9,ITGB2,STX7,WBP2,RAB27B,PTPRC,IGHV3-23,PTK2,S100A4,IGHV3-7,STOM,CD36,COLEC11,IGHV5-51,PITHD1,TGFB1I1,IL6ST,ITSN2,IGHV2-26,IGHV2-70D,TSG101,ASAP1,VPS4A,ASH1L
GO:BP,	negative regulation of blood coagulation	GO:0030195	3.4572387614112573e-7	6.461270626479363	50	110	8	21128	FGB,FGG,FGA,PLG,HRG,SERPINF2,GP1BA,CPB2
GO:BP,	regulation of coagulation	GO:0050818	3.5200971613017045e-7	6.453445349011975	75	110	9	21128	FGB,FGG,FGA,PLG,HRG,SERPINF2,GP1BA,CPB2,CD36
GO:BP,	blood coagulation, fibrin clot formation	GO:0072378	3.7954807706427576e-7	6.420733204534605	17	110	6	21128	FGB,FGG,FGA,F13B,GP5,GP1BA
GO:BP,	negative regulation of hemostasis	GO:1900047	4.082852106984418e-7	6.389036351226611	51	110	8	21128	FGB,FGG,FGA,PLG,HRG,SERPINF2,GP1BA,CPB2
GO:BP,	negative regulation of coagulation	GO:0050819	6.585843608725336e-7	6.181388586511149	54	110	8	21128	FGB,FGG,FGA,PLG,HRG,SERPINF2,GP1BA,CPB2
GO:BP,	positive regulation of cell adhesion	GO:0045785	8.036518432223571e-7	6.0949320548765575	477	110	17	21128	FGB,FGG,FGA,HRG,SERPINF2,ITGB3,SELP,RSU1,GP1BA,LIMS1,CORO1A,PTPN6,UNC13D,ITGB2,PTPRC,CD36,IL6ST
GO:BP,	cell-cell adhesion	GO:0098609	9.929331931297945e-7	6.003079970871307	948	110	23	21128	FGB,FGG,FGA,PLG,HBB,SERPINF2,ITGB3,SELP,ITGA2B,PDLIM1,FGL1,GP1BA,LIMS1,CORO1A,S100A8,PTPN6,PECAM1,ITGA6,S100A9,ITGB2,PTPRC,PTK2,IL6ST
GO:BP,	protein activation cascade	GO:0072376	0.0000011737162125258423	5.930436896472189	20	110	6	21128	FGB,FGG,FGA,F13B,GP5,GP1BA
GO:BP,	establishment of localization	GO:0051234	0.0000018470505667515458	5.733521214705644	4933	110	55	21128	FGB,FGG,FGA,C4A,LCP1,VCP,IGHM,IGHG2,C4BPA,HBB,LTF,HRG,IGHG4,ITGB3,BIN2,CA2,HBD,LCN2,AZGP1,GP5,GP1BA,PPBP,LIMS1,CORO1A,IGLC2,S100A8,RBP4,PTPN6,CPB2,UNC13D,PECAM1,CANX,GRB2,APOM,ITGB2,STX7,WBP2,RAB27B,PTPRC,IGHV3-23,PTK2,IGHV3-7,STOM,CD36,COLEC11,C4BPB,IGHV5-51,RP2,RUFY1,ITSN2,IGHV2-26,IGHV2-70D,TSG101,PIK3C3,VPS4A
GO:BP,	regulation of wound healing	GO:0061041	0.0000028280185233743515	5.548517750259537	130	110	10	21128	FGB,FGG,FGA,PLG,HRG,SERPINF2,GP1BA,CPB2,PTK2,CD36
GO:BP,	leukocyte migration	GO:0050900	0.00000454446678630246	5.342517066314716	399	110	15	21128	PLG,ITGB3,SELP,S100A12,GP1BA,PPBP,CORO1A,S100A8,PECAM1,PF4,ITGA6,S100A9,ITGB2,PF4V1,PTK2
GO:BP,	signal transduction	GO:0007165	0.0000047150215511538175	5.3265163178734625	6012	110	61	21128	FGB,VWF,FGG,FGA,LCP1,VCP,IGHM,IGHG2,LTF,HRG,SERPINF2,IGHG4,ITGB3,SELP,ITGA2B,ARHGDIB,CA2,RSU1,S100A12,GP1BA,PPBP,LIMS1,CORO1A,IGLC2,S100A8,PTPN6,LSP1,MANF,MMP8,CDA,PECAM1,PF4,ITGA6,GRB2,IQGAP2,SKAP2,S100A9,ITGB2,PF4V1,WBP2,RGS10,PTPRC,IGHV3-23,PTK2,S100A4,IGHV3-7,CD36,COLEC11,IGHV5-51,TGFB1I1,FCGR3B,IL6ST,RUFY1,IGHV2-26,IGHV2-70D,TSG101,GRAP2,RWDD1,PIK3C3,VPS4A,ASH1L
GO:BP,	immune response-activating cell surface receptor signaling pathway	GO:0002429	0.000005661124193686217	5.247097317462876	343	110	14	21128	IGHM,IGHG2,LTF,IGHG4,IGLC2,PTPN6,PTPRC,IGHV3-23,PTK2,IGHV3-7,COLEC11,IGHV5-51,IGHV2-26,IGHV2-70D
GO:BP,	transport	GO:0006810	0.0000057575328902096585	5.23976357242656	4773	110	53	21128	FGB,FGG,FGA,C4A,LCP1,VCP,IGHM,IGHG2,C4BPA,HBB,LTF,HRG,IGHG4,ITGB3,BIN2,CA2,HBD,LCN2,AZGP1,GP5,GP1BA,PPBP,CORO1A,IGLC2,S100A8,RBP4,PTPN6,CPB2,UNC13D,PECAM1,CANX,GRB2,APOM,ITGB2,STX7,RAB27B,PTPRC,IGHV3-23,PTK2,IGHV3-7,STOM,CD36,COLEC11,C4BPB,IGHV5-51,RP2,RUFY1,ITSN2,IGHV2-26,IGHV2-70D,TSG101,PIK3C3,VPS4A
GO:BP,	regulation of cell adhesion	GO:0030155	0.000005792192759369702	5.2371569936103555	777	110	20	21128	FGB,FGG,FGA,PLG,HRG,SERPINF2,ITGB3,SELP,RSU1,FGL1,GP1BA,LIMS1,CORO1A,PTPN6,UNC13D,ITGB2,PTPRC,PTK2,CD36,IL6ST
GO:BP,	platelet aggregation	GO:0070527	0.000007011868786708956	5.154166219466639	72	110	8	21128	FGB,FGG,FGA,HBB,ITGB3,GP1BA,PTPN6,IL6ST
GO:BP,	negative regulation of wound healing	GO:0061045	0.00000784108941018236	5.105623593953042	73	110	8	21128	FGB,FGG,FGA,PLG,HRG,SERPINF2,GP1BA,CPB2
GO:BP,	signaling	GO:0023052	0.00001044100678820514	4.9812576218816105	6462	110	63	21128	FGB,VWF,FGG,FGA,PLG,LCP1,VCP,IGHM,IGHG2,LTF,HRG,SERPINF2,IGHG4,ITGB3,SELP,ITGA2B,ARHGDIB,CA2,RSU1,S100A12,GP1BA,PPBP,LIMS1,CORO1A,IGLC2,S100A8,RBP4,PTPN6,LSP1,MANF,MMP8,CDA,PECAM1,PF4,ITGA6,GRB2,IQGAP2,SKAP2,S100A9,ITGB2,PF4V1,WBP2,RGS10,PTPRC,IGHV3-23,PTK2,S100A4,IGHV3-7,CD36,COLEC11,IGHV5-51,TGFB1I1,FCGR3B,IL6ST,RUFY1,IGHV2-26,IGHV2-70D,TSG101,GRAP2,RWDD1,PIK3C3,VPS4A,ASH1L
GO:BP,	immune response-regulating cell surface receptor signaling pathway	GO:0002768	0.000015374861244588662	4.81318879496597	371	110	14	21128	IGHM,IGHG2,LTF,IGHG4,IGLC2,PTPN6,PTPRC,IGHV3-23,PTK2,IGHV3-7,COLEC11,IGHV5-51,IGHV2-26,IGHV2-70D
GO:BP,	positive regulation of B cell activation	GO:0050871	0.000016625674034396275	4.779220738597192	156	110	10	21128	IGHM,IGHG2,IGHG4,IGLC2,PTPRC,IGHV3-23,IGHV3-7,IGHV5-51,IGHV2-26,IGHV2-70D
GO:BP,	regulation of B cell activation	GO:0050864	0.00001691323861915895	4.771773223877219	203	110	11	21128	IGHM,IGHG2,IGHG4,IGLC2,PTPN6,PTPRC,IGHV3-23,IGHV3-7,IGHV5-51,IGHV2-26,IGHV2-70D
GO:BP,	positive regulation of leukocyte activation	GO:0002696	0.000019142363469202528	4.7180044417805	444	110	15	21128	IGHM,IGHG2,IGHG4,CORO1A,IGLC2,PTPN6,MMP8,ITGB2,PTPRC,IGHV3-23,IGHV3-7,IGHV5-51,IL6ST,IGHV2-26,IGHV2-70D
GO:BP,	cell communication	GO:0007154	0.000021707016237208105	4.663399868888821	6573	110	63	21128	FGB,VWF,FGG,FGA,PLG,LCP1,VCP,IGHM,IGHG2,LTF,HRG,SERPINF2,IGHG4,ITGB3,SELP,ITGA2B,ARHGDIB,CA2,RSU1,S100A12,GP1BA,PPBP,LIMS1,CORO1A,IGLC2,S100A8,RBP4,PTPN6,LSP1,MANF,MMP8,CDA,PECAM1,PF4,ITGA6,GRB2,IQGAP2,SKAP2,S100A9,ITGB2,PF4V1,WBP2,RGS10,PTPRC,IGHV3-23,PTK2,S100A4,IGHV3-7,CD36,COLEC11,IGHV5-51,TGFB1I1,FCGR3B,IL6ST,RUFY1,IGHV2-26,IGHV2-70D,TSG101,GRAP2,RWDD1,PIK3C3,VPS4A,ASH1L
GO:BP,	regulation of response to wounding	GO:1903034	0.000023892766633548362	4.621733558742556	162	110	10	21128	FGB,FGG,FGA,PLG,HRG,SERPINF2,GP1BA,CPB2,PTK2,CD36
GO:BP,	cellular response to stimulus	GO:0051716	0.0000284456450903721	4.545984212853771	7491	110	68	21128	FGB,VWF,FGG,FGA,LCP1,VCP,IGHM,IGHG2,HBB,LTF,HRG,SERPINF2,IGHG4,ITGB3,SELP,ITGA2B,BIN2,ARHGDIB,CA2,HBD,RSU1,S100A12,GP1BA,PPBP,LIMS1,CORO1A,IGLC2,S100A8,PTPN6,LSP1,CPB2,MANF,MMP8,CDA,PECAM1,CANX,PF4,ITGA6,GRB2,IQGAP2,APOM,SKAP2,S100A9,ITGB2,PF4V1,WBP2,RGS10,PTPRC,IGHV3-23,PTK2,S100A4,IGHV3-7,CD36,COLEC11,IGHV5-51,TGFB1I1,GPX3,FCGR3B,IL6ST,RUFY1,IGHV2-26,IGHV2-70D,TSG101,GRAP2,RWDD1,PIK3C3,VPS4A,AS…
GO:BP,	positive regulation of exocytosis	GO:0045921	0.00003209499799485531	4.493562647112381	87	110	8	21128	FGB,FGG,FGA,UNC13D,ITGB2,RAB27B,TSG101,VPS4A
GO:BP,	regulation of cell-substrate adhesion	GO:0010810	0.00003218989190952486	4.492280481629879	216	110	11	21128	FGB,FGG,FGA,PLG,HRG,ITGB3,RSU1,LIMS1,UNC13D,PTK2,CD36
GO:BP,	immune response-activating signaling pathway	GO:0002757	0.000032474803721921374	4.488453465127731	462	110	15	21128	IGHM,IGHG2,LTF,IGHG4,IGLC2,PTPN6,PTPRC,IGHV3-23,PTK2,IGHV3-7,CD36,COLEC11,IGHV5-51,IGHV2-26,IGHV2-70D
GO:BP,	positive regulation of cell-substrate adhesion	GO:0010811	0.00003703912012776141	4.431339338626083	126	110	9	21128	FGB,FGG,FGA,HRG,ITGB3,RSU1,LIMS1,UNC13D,CD36
GO:BP,	negative regulation of response to wounding	GO:1903035	0.00003845936614990416	4.414997877660394	89	110	8	21128	FGB,FGG,FGA,PLG,HRG,SERPINF2,GP1BA,CPB2
GO:BP,	membrane organization	GO:0061024	0.00005227308082746249	4.281721903060135	886	110	20	21128	IGHM,IGHG2,IGHG4,BIN2,CORO1A,IGLC2,S100A9,GCA,ITGB2,STX7,PTPRC,IGHV3-23,IGHV3-7,CD36,IGHV5-51,IGHV2-26,IGHV2-70D,TSG101,ASAP1,VPS4A
GO:BP,	regulation of substrate adhesion-dependent cell spreading	GO:1900024	0.00005479328592674843	4.261272654355144	61	110	7	21128	FGB,FGG,FGA,ITGB3,LIMS1,UNC13D,PTK2
GO:BP,	localization	GO:0051179	0.00006507150358680854	4.186609158043928	5578	110	56	21128	FGB,FGG,FGA,C4A,LCP1,VCP,IGHM,IGHG2,C4BPA,HBB,LTF,HRG,IGHG4,ITGB3,BIN2,CA2,HBD,LCN2,AZGP1,GP5,GP1BA,PPBP,LIMS1,CORO1A,IGLC2,S100A8,RBP4,PTPN6,CPB2,UNC13D,PECAM1,CANX,GRB2,APOM,S100A9,ITGB2,STX7,WBP2,RAB27B,PTPRC,IGHV3-23,PTK2,IGHV3-7,STOM,CD36,COLEC11,C4BPB,IGHV5-51,RP2,RUFY1,ITSN2,IGHV2-26,IGHV2-70D,TSG101,PIK3C3,VPS4A
GO:BP,	homotypic cell-cell adhesion	GO:0034109	0.00007006880225403944	4.154475306209967	96	110	8	21128	FGB,FGG,FGA,HBB,ITGB3,GP1BA,PTPN6,IL6ST
GO:BP,	immune response-regulating signaling pathway	GO:0002764	0.00007056609889663294	4.151403890990066	490	110	15	21128	IGHM,IGHG2,LTF,IGHG4,IGLC2,PTPN6,PTPRC,IGHV3-23,PTK2,IGHV3-7,CD36,COLEC11,IGHV5-51,IGHV2-26,IGHV2-70D
GO:BP,	negative regulation of humoral immune response	GO:0002921	0.00007091396824259075	4.149268211457503	19	110	5	21128	A2M,C4BPA,MASP1,PTPN6,C4BPB
GO:BP,	cell-matrix adhesion	GO:0007160	0.00008717187023227561	4.059623636326552	238	110	11	21128	FGB,FGG,FGA,HRG,ITGB3,ITGA2B,LIMS1,ITGA6,ITGB2,PTK2,CD36
GO:BP,	regulation of biological process	GO:0050789	0.0000918675078856933	4.03683806468681	12378	110	91	21128	A2M,FGB,VWF,FGG,FGA,C4A,PLG,LCP1,VCP,IGHM,IGHG2,C4BPA,HBB,LTF,HRG,SERPINF2,IGHG4,ITGB3,SELP,ITGA2B,ARHGDIB,PDLIM1,CA2,HBD,RSU1,S100A12,LCN2,FGL1,AZGP1,GP5,GP1BA,PPBP,LIMS1,CORO1A,CFHR1,IGLC2,MASP1,S100A8,RBP4,PTPN6,LSP1,CPB2,MANF,MMP8,UNC13D,CDA,PECAM1,CFHR2,PF4,ITGA6,H1-4,GRB2,PTPA,IQGAP2,APOM,SKAP2,S100A9,ITGB2,PF4V1,STX7,WBP2,RAB27B,RGS10,PTPRC,IGHV3-23,PTK2,S100A4,IGHV3-7,STOM,CD36,COLEC11,C4…
GO:BP,	regulation of leukocyte activation	GO:0002694	0.00009585749267798076	4.018373934934868	658	110	17	21128	IGHM,IGHG2,IGHG4,FGL1,CORO1A,IGLC2,PTPN6,MMP8,UNC13D,ITGB2,PTPRC,IGHV3-23,IGHV3-7,IGHV5-51,IL6ST,IGHV2-26,IGHV2-70D
GO:BP,	antigen receptor-mediated signaling pathway	GO:0050851	0.00011235934991327361	3.949390782196472	244	110	11	21128	IGHM,IGHG2,IGHG4,IGLC2,PTPN6,PTPRC,IGHV3-23,IGHV3-7,IGHV5-51,IGHV2-26,IGHV2-70D
GO:BP,	cell surface receptor signaling pathway	GO:0007166	0.00012021379156727333	3.920045704895917	2869	110	37	21128	FGB,FGG,FGA,VCP,IGHM,IGHG2,LTF,HRG,IGHG4,ITGB3,ITGA2B,GP1BA,PPBP,LIMS1,CORO1A,IGLC2,PTPN6,CDA,PECAM1,PF4,ITGA6,GRB2,ITGB2,PF4V1,PTPRC,IGHV3-23,PTK2,IGHV3-7,CD36,COLEC11,IGHV5-51,TGFB1I1,FCGR3B,IL6ST,IGHV2-26,IGHV2-70D,TSG101
GO:BP,	regulation of multicellular organismal process	GO:0051239	0.00012288359925549018	3.910506076659031	3004	110	38	21128	FGB,FGG,FGA,PLG,IGHM,IGHG2,LTF,HRG,SERPINF2,IGHG4,ITGB3,SELP,ARHGDIB,LCN2,FGL1,GP5,GP1BA,CORO1A,IGLC2,RBP4,PTPN6,CPB2,MMP8,UNC13D,PF4,APOM,ITGB2,PTPRC,IGHV3-23,PTK2,IGHV3-7,CD36,IGHV5-51,PITHD1,TGFB1I1,IL6ST,IGHV2-26,IGHV2-70D
GO:BP,	regulation of response to external stimulus	GO:0032101	0.00012746709860928223	3.894601899436913	1030	110	21	21128	A2M,FGB,FGG,FGA,PLG,LTF,HRG,SERPINF2,S100A12,GP1BA,S100A8,PTPN6,CPB2,MMP8,S100A9,PTPRC,PTK2,CD36,COLEC11,IL6ST,ASH1L
GO:BP,	biological regulation	GO:0065007	0.0001365264990780531	3.8647830461584536	12926	110	93	21128	A2M,FGB,VWF,FGG,FGA,C4A,PLG,LCP1,VCP,IGHM,IGHG2,C4BPA,HBB,LTF,HRG,SERPINF2,IGHG4,ITGB3,SELP,ITGA2B,ARHGDIB,PDLIM1,CA2,HBD,RSU1,F13B,S100A12,LCN2,FGL1,AZGP1,GP5,GP1BA,PPBP,LIMS1,CORO1A,CFHR1,IGLC2,MASP1,S100A8,RBP4,PTPN6,LSP1,CPB2,MANF,MMP8,UNC13D,CDA,PECAM1,CFHR2,PF4,ITGA6,H1-4,GRB2,PTPA,IQGAP2,APOM,SKAP2,S100A9,ITGB2,PF4V1,STX7,WBP2,RAB27B,RGS10,PTPRC,IGHV3-23,PTK2,S100A4,IGHV3-7,STOM,CD36,COLEC…
GO:BP,	regulation of cellular process	GO:0050794	0.00015808618914504245	3.801106069600308	11139	110	85	21128	FGB,VWF,FGG,FGA,C4A,PLG,LCP1,VCP,IGHM,IGHG2,C4BPA,HBB,LTF,HRG,SERPINF2,IGHG4,ITGB3,SELP,ITGA2B,ARHGDIB,PDLIM1,CA2,HBD,RSU1,S100A12,FGL1,AZGP1,GP5,GP1BA,PPBP,LIMS1,CORO1A,IGLC2,S100A8,RBP4,PTPN6,LSP1,CPB2,MANF,MMP8,UNC13D,CDA,PECAM1,PF4,ITGA6,H1-4,GRB2,PTPA,IQGAP2,APOM,SKAP2,S100A9,ITGB2,PF4V1,STX7,WBP2,RAB27B,RGS10,PTPRC,IGHV3-23,PTK2,S100A4,IGHV3-7,STOM,CD36,COLEC11,C4BPB,IGHV5-51,PITHD1,TGFB1I1…
GO:BP,	positive regulation of substrate adhesion-dependent cell spreading	GO:1900026	0.00019315121135970577	3.7141025638060565	44	110	6	21128	FGB,FGG,FGA,ITGB3,LIMS1,UNC13D
GO:BP,	regulation of vesicle-mediated transport	GO:0060627	0.00023801134970320102	3.6234023328764886	538	110	15	21128	FGB,FGG,FGA,C4A,ITGB3,CORO1A,UNC13D,ITGB2,RAB27B,PTPRC,CD36,COLEC11,RUFY1,TSG101,VPS4A
GO:BP,	regulation of humoral immune response	GO:0002920	0.00025414204913009285	3.5949234727129618	46	110	6	21128	A2M,C4BPA,MASP1,PTPN6,PTPRC,C4BPB
GO:BP,	inflammatory response	GO:0006954	0.0002603728665814658	3.5844042755106127	793	110	18	21128	A2M,C4A,SERPINF2,SELP,S100A12,PPBP,S100A8,MMP8,UNC13D,PF4,S100A9,ITGB2,PF4V1,LYZ,PTPRC,CD36,IL6ST,ASH1L
GO:BP,	positive regulation of lymphocyte activation	GO:0051251	0.00028305193457782543	3.548133872492501	397	110	13	21128	IGHM,IGHG2,IGHG4,CORO1A,IGLC2,PTPN6,PTPRC,IGHV3-23,IGHV3-7,IGHV5-51,IL6ST,IGHV2-26,IGHV2-70D
GO:BP,	granulocyte migration	GO:0097530	0.00029256136738326535	3.533783022844954	160	110	9	21128	S100A12,PPBP,S100A8,PECAM1,PF4,S100A9,ITGB2,PF4V1,PTK2
GO:BP,	biological process involved in interaction with symbiont	GO:0051702	0.00030806196616813144	3.5113619170771737	116	110	8	21128	PLG,LTF,HRG,CFHR1,CFHR2,PF4,STOM,PIK3C3
GO:BP,	regulation of cell-cell adhesion	GO:0022407	0.0003391044385986674	3.4696665256265353	476	110	14	21128	FGB,FGG,FGA,PLG,SERPINF2,SELP,FGL1,GP1BA,CORO1A,PTPN6,ITGB2,PTPRC,PTK2,IL6ST
GO:BP,	leukocyte activation	GO:0045321	0.0003677021284426372	3.4345038562115917	999	110	20	21128	LCP1,IGHM,IGHG2,IGHG4,S100A12,FGL1,CORO1A,IGLC2,PTPN6,MMP8,UNC13D,SKAP2,ITGB2,PTPRC,IGHV3-23,IGHV3-7,IGHV5-51,IL6ST,IGHV2-26,IGHV2-70D
GO:BP,	antimicrobial humoral immune response mediated by antimicrobial peptide	GO:0061844	0.00047471942519765656	3.32356299688171	83	110	7	21128	LTF,HRG,S100A12,PPBP,PF4,S100A9,PF4V1
GO:BP,	plasminogen activation	GO:0031639	0.00047627710076104414	3.322140298715558	27	110	5	21128	FGB,FGG,FGA,SERPINF2,CPB2
GO:BP,	B cell activation	GO:0042113	0.0005219758669867533	3.282349575688861	349	110	12	21128	IGHM,IGHG2,IGHG4,IGLC2,PTPN6,SKAP2,PTPRC,IGHV3-23,IGHV3-7,IGHV5-51,IGHV2-26,IGHV2-70D
GO:BP,	regulation of platelet activation	GO:0010543	0.0005385584703330405	3.2687671392286	52	110	6	21128	FGG,HRG,SELP,GP5,GP1BA,IL6ST
GO:BP,	positive regulation of blood coagulation	GO:0030194	0.0005774179752648087	3.238509700474687	28	110	5	21128	PLG,HRG,SERPINF2,CPB2,CD36
GO:BP,	positive regulation of hemostasis	GO:1900048	0.0005774179752648087	3.238509700474687	28	110	5	21128	PLG,HRG,SERPINF2,CPB2,CD36
GO:BP,	lymphocyte activation	GO:0046649	0.0005871330069973752	3.2312635040987687	838	110	18	21128	LCP1,IGHM,IGHG2,IGHG4,FGL1,CORO1A,IGLC2,PTPN6,UNC13D,SKAP2,ITGB2,PTPRC,IGHV3-23,IGHV3-7,IGHV5-51,IL6ST,IGHV2-26,IGHV2-70D
GO:BP,	complement activation, lectin pathway	GO:0001867	0.0006173888254297452	3.2094412353950936	12	110	4	21128	A2M,MASP1,COLEC11,MASP2
GO:BP,	response to organic substance	GO:0010033	0.0006607802142964677	3.1799429695474055	2664	110	34	21128	A2M,FGB,FGG,VCP,LTF,ITGB3,SELP,CA2,PPBP,LIMS1,CORO1A,S100A8,RBP4,PTPN6,LSP1,CPB2,MANF,CDA,CANX,PF4,GRB2,CPN1,S100A9,ITGB2,PF4V1,WBP2,RGS10,PTPRC,PTK2,CD36,GPX3,IL6ST,RWDD1,PIK3C3
GO:BP,	granulocyte chemotaxis	GO:0071621	0.0007864628559237934	3.104321783973008	131	110	8	21128	S100A12,PPBP,S100A8,PF4,S100A9,ITGB2,PF4V1,PTK2
GO:BP,	neutrophil migration	GO:1990266	0.0007864628559237934	3.104321783973008	131	110	8	21128	S100A12,PPBP,S100A8,PECAM1,PF4,S100A9,ITGB2,PF4V1
GO:BP,	cell adhesion mediated by integrin	GO:0033627	0.0008291212829694121	3.0813819366732047	90	110	7	21128	HRG,ITGB3,ITGA2B,PTPN6,ITGA6,ITGB2,PTK2
GO:BP,	positive regulation of coagulation	GO:0050820	0.0008303468580936078	3.0807404533000726	30	110	5	21128	PLG,HRG,SERPINF2,CPB2,CD36
GO:BP,	negative regulation of fibrinolysis	GO:0051918	0.0008882075883447902	3.0514855207793308	13	110	4	21128	PLG,HRG,SERPINF2,CPB2
GO:BP,	regulation of immune effector process	GO:0002697	0.0010888109504866713	2.9630475199575317	374	110	12	21128	A2M,C4BPA,MASP1,RBP4,PTPN6,UNC13D,ITGB2,STX7,PTPRC,CD36,COLEC11,C4BPB
GO:BP,	positive regulation of secretion	GO:0051047	0.0011969754606539489	2.9219147530286955	309	110	11	21128	FGB,FGG,FGA,S100A8,RBP4,CPB2,UNC13D,ITGB2,RAB27B,TSG101,VPS4A
GO:BP,	heterotypic cell-cell adhesion	GO:0034113	0.001280420382021296	2.8926474212750732	60	110	6	21128	FGB,FGG,FGA,ITGB3,ITGB2,PTPRC
GO:BP,	positive regulation of wound healing	GO:0090303	0.001280420382021296	2.8926474212750732	60	110	6	21128	PLG,HRG,SERPINF2,CPB2,PTK2,CD36
GO:BP,	cell chemotaxis	GO:0060326	0.0014461314710035277	2.8397922225768473	315	110	11	21128	HRG,BIN2,S100A12,PPBP,CORO1A,S100A8,PF4,S100A9,ITGB2,PF4V1,PTK2
GO:BP,	positive regulation of cell-cell adhesion	GO:0022409	0.0015387942835812223	2.812819435709219	317	110	11	21128	FGB,FGG,FGA,SERPINF2,SELP,GP1BA,CORO1A,PTPN6,ITGB2,PTPRC,IL6ST
GO:BP,	negative regulation of complement activation	GO:0045916	0.0016820988540690977	2.7741484850451315	15	110	4	21128	A2M,C4BPA,MASP1,C4BPB
GO:BP,	biological process involved in symbiotic interaction	GO:0044403	0.0016876106158237529	2.7727277513754993	320	110	11	21128	PLG,LTF,HRG,ITGB3,CFHR1,CFHR2,PF4,STOM,TSG101,PIK3C3,VPS4A
GO:BP,	negative regulation of response to external stimulus	GO:0032102	0.0021487839024203217	2.6678072581732253	399	110	12	21128	A2M,FGB,FGG,FGA,PLG,LTF,HRG,SERPINF2,GP1BA,CPB2,PTPRC,ASH1L
GO:BP,	neutrophil chemotaxis	GO:0030593	0.002526025597320007	2.597562252862832	106	110	7	21128	S100A12,PPBP,S100A8,PF4,S100A9,ITGB2,PF4V1
GO:BP,	regulation of lymphocyte activation	GO:0051249	0.0027389114547203123	2.5624220076686215	567	110	14	21128	IGHM,IGHG2,IGHG4,FGL1,CORO1A,IGLC2,PTPN6,PTPRC,IGHV3-23,IGHV3-7,IGHV5-51,IL6ST,IGHV2-26,IGHV2-70D
GO:BP,	substrate adhesion-dependent cell spreading	GO:0034446	0.003446172915476578	2.462662935142992	111	110	7	21128	FGB,FGG,FGA,ITGB3,LIMS1,UNC13D,PTK2
GO:BP,	regulation of fibrinolysis	GO:0051917	0.0037256979307615646	2.4287923594025784	18	110	4	21128	PLG,HRG,SERPINF2,CPB2
GO:BP,	positive regulation of response to wounding	GO:1903036	0.003798754579703501	2.4203587633348342	72	110	6	21128	PLG,HRG,SERPINF2,CPB2,PTK2,CD36
GO:BP,	positive regulation of secretion by cell	GO:1903532	0.00410719565358897	2.3864546082614817	282	110	10	21128	FGB,FGG,FGA,RBP4,CPB2,UNC13D,ITGB2,RAB27B,TSG101,VPS4A
GO:BP,	regulation of localization	GO:0032879	0.004318998397749176	2.364616957065912	2101	110	28	21128	FGB,FGG,FGA,C4A,LCP1,VCP,ITGB3,CA2,GP5,GP1BA,CORO1A,S100A8,RBP4,PTPN6,CPB2,UNC13D,PECAM1,ITGB2,STX7,RAB27B,PTPRC,STOM,CD36,COLEC11,RUFY1,TSG101,PIK3C3,VPS4A
GO:BP,	regulation of humoral immune response mediated by circulating immunoglobulin	GO:0002923	0.004700306987433281	2.327873776405903	19	110	4	21128	C4BPA,PTPN6,PTPRC,C4BPB
GO:BP,	maintenance of location in cell	GO:0051651	0.005666483173638061	2.2466863965119845	228	110	9	21128	ITGB3,LCN2,GP5,GP1BA,CORO1A,S100A8,PTPN6,S100A9,PTPRC
GO:BP,	response to chemical	GO:0042221	0.006151185373928421	2.2110411847530203	4088	110	42	21128	A2M,FGB,FGG,FGA,VCP,HBB,LTF,HRG,ITGB3,SELP,BIN2,CA2,HBD,S100A12,AZGP1,PPBP,LIMS1,CORO1A,S100A8,RBP4,PTPN6,LSP1,CPB2,MANF,CDA,CANX,PF4,GRB2,CPN1,APOM,S100A9,ITGB2,PF4V1,WBP2,RGS10,PTPRC,PTK2,CD36,GPX3,IL6ST,RWDD1,PIK3C3
GO:BP,	positive regulation of intracellular signal transduction	GO:1902533	0.006820107364959297	2.1662087884458154	995	110	18	21128	FGB,VWF,FGG,FGA,LTF,SERPINF2,ITGB3,SELP,S100A12,LIMS1,S100A8,PTPN6,MMP8,S100A9,PTPRC,PTK2,S100A4,CD36
GO:BP,	proteolysis	GO:0006508	0.007382369143756212	2.1318042423849994	1787	110	25	21128	A2M,FGB,FGG,FGA,C4A,PLG,VCP,LTF,HRG,SERPINF2,MASP1,S100A8,CPB2,MMP8,CANX,CPN1,S100A9,PTK2,COLEC11,PITHD1,TGFB1I1,TSG101,MASP2,PIK3C3,VPS4A
GO:BP,	regulation of response to stress	GO:0080134	0.007944595395804511	2.0999282157434322	1441	110	22	21128	A2M,FGB,FGG,FGA,PLG,LTF,HRG,SERPINF2,S100A12,GP1BA,S100A8,PTPN6,CPB2,MANF,MMP8,S100A9,PTPRC,PTK2,CD36,COLEC11,IL6ST,ASH1L
GO:BP,	positive regulation of transport	GO:0051050	0.007985413554064992	2.097702587403071	905	110	17	21128	FGB,FGG,FGA,C4A,CA2,S100A8,RBP4,CPB2,UNC13D,ITGB2,RAB27B,PTPRC,STOM,CD36,COLEC11,TSG101,VPS4A
GO:BP,	regulation of hydrolase activity	GO:0051336	0.008055482388252967	2.093908447512479	1007	110	18	21128	A2M,C4A,VCP,LTF,HRG,SERPINF2,RSU1,LIMS1,S100A8,ITGA6,PTPA,IQGAP2,S100A9,RGS10,PTPRC,PTK2,RP2,ASAP1
GO:BP,	cellular response to chemical stimulus	GO:0070887	0.008152907362736227	2.088687492311201	2697	110	32	21128	FGB,FGG,VCP,HBB,LTF,HRG,ITGB3,BIN2,CA2,HBD,S100A12,PPBP,LIMS1,CORO1A,S100A8,PTPN6,LSP1,CPB2,PF4,GRB2,APOM,S100A9,ITGB2,PF4V1,WBP2,RGS10,PTPRC,PTK2,CD36,GPX3,IL6ST,RWDD1
GO:BP,	regulation of complement activation	GO:0030449	0.008764494767438524	2.0572731139156137	22	110	4	21128	A2M,C4BPA,MASP1,C4BPB
GO:BP,	leukocyte chemotaxis	GO:0030595	0.008902615334217604	2.0504823912914705	241	110	9	21128	S100A12,PPBP,CORO1A,S100A8,PF4,S100A9,ITGB2,PF4V1,PTK2
GO:BP,	myeloid leukocyte migration	GO:0097529	0.00920674038013633	2.0358941032983795	242	110	9	21128	S100A12,PPBP,S100A8,PECAM1,PF4,S100A9,ITGB2,PF4V1,PTK2
GO:BP,	multicellular organismal process	GO:0032501	0.010117899285413765	1.9949096479168509	7657	110	63	21128	A2M,FGB,VWF,FGG,FGA,PLG,LCP1,IGHM,IGHG2,HBB,LTF,HRG,SERPINF2,IGHG4,ITGB3,SELP,ITGA2B,ARHGDIB,PDLIM1,F13B,S100A12,LCN2,FGL1,AZGP1,GP5,GP1BA,CORO1A,IGLC2,S100A8,RBP4,PTPN6,CPB2,MANF,MMP8,UNC13D,PECAM1,PF4,ITGA6,GRB2,APOM,SKAP2,S100A9,ITGB2,PF4V1,LYZ,PTPRC,IGHV3-23,PTK2,IGHV3-7,CD36,C4BPB,IGHV5-51,PITHD1,TGFB1I1,RP2,IL6ST,ITSN2,IGHV2-26,IGHV2-70D,ASAP1,VPS4A,CKMT2,ASH1L
GO:BP,	cell killing	GO:0001906	0.010951037224448217	1.9605447447945437	186	110	8	21128	LTF,S100A12,CORO1A,PTPN6,UNC13D,LYZ,STX7,PTPRC
GO:BP,	positive regulation of signaling	GO:0023056	0.013487301146842219	1.8700749453834182	1727	110	24	21128	FGB,VWF,FGG,FGA,VCP,LTF,SERPINF2,ITGB3,SELP,CA2,S100A12,LIMS1,S100A8,RBP4,PTPN6,MMP8,S100A9,WBP2,PTPRC,PTK2,S100A4,CD36,TGFB1I1,IL6ST
GO:BP,	positive regulation of cell communication	GO:0010647	0.013754329246734854	1.8615605838671465	1729	110	24	21128	FGB,VWF,FGG,FGA,VCP,LTF,SERPINF2,ITGB3,SELP,CA2,S100A12,LIMS1,S100A8,RBP4,PTPN6,MMP8,S100A9,WBP2,PTPRC,PTK2,S100A4,CD36,TGFB1I1,IL6ST
GO:BP,	positive regulation of response to external stimulus	GO:0032103	0.013769692077997988	1.8610757714585129	563	110	13	21128	PLG,LTF,HRG,SERPINF2,S100A12,S100A8,CPB2,MMP8,S100A9,PTK2,CD36,COLEC11,IL6ST
GO:BP,	negative regulation of response to stimulus	GO:0048585	0.01404134899272929	1.852591166283498	1611	110	23	21128	A2M,FGB,FGG,FGA,PLG,VCP,C4BPA,LTF,HRG,SERPINF2,GP1BA,MASP1,PTPN6,CPB2,PF4,ITGA6,RGS10,PTPRC,C4BPB,TGFB1I1,IL6ST,TSG101,ASH1L
GO:BP,	leukocyte cell-cell adhesion	GO:0007159	0.015449033380793134	1.811098688441112	403	110	11	21128	SELP,FGL1,GP1BA,CORO1A,S100A8,PTPN6,PECAM1,S100A9,ITGB2,PTPRC,IL6ST
GO:BP,	regulation of peptidyl-tyrosine phosphorylation	GO:0050730	0.016422018736411432	1.7845734567053526	260	110	9	21128	HRG,ITGB3,PTPN6,PECAM1,ITGB2,PTPRC,CD36,IL6ST,TSG101
GO:BP,	cellular oxidant detoxification	GO:0098869	0.019179790303639657	1.717156145365043	95	110	6	21128	HBB,HBD,APOM,S100A9,CD36,GPX3
GO:BP,	positive regulation of signal transduction	GO:0009967	0.020187800294560982	1.694911000124163	1528	110	22	21128	FGB,VWF,FGG,FGA,VCP,LTF,SERPINF2,ITGB3,SELP,S100A12,LIMS1,S100A8,PTPN6,MMP8,S100A9,WBP2,PTPRC,PTK2,S100A4,CD36,TGFB1I1,IL6ST
GO:BP,	protein maturation	GO:0051604	0.0207998047986377	1.6819407407714837	339	110	10	21128	FGB,FGG,FGA,SERPINF2,F13B,GP5,GP1BA,CPB2,CPN1,PIK3C3
GO:BP,	cytolysis by host of symbiont cells	GO:0051838	0.020878662447873054	1.6802973270354102	9	110	3	21128	HRG,CFHR1,CFHR2
GO:BP,	maintenance of location	GO:0051235	0.021337773175632405	1.6708509058111147	340	110	10	21128	ITGB3,LCN2,GP5,GP1BA,CORO1A,S100A8,PTPN6,S100A9,PTPRC,CD36
GO:BP,	response to oxygen-containing compound	GO:1901700	0.02401457192674324	1.6195251504995236	1665	110	23	21128	A2M,VCP,HBB,LTF,ITGB3,SELP,CA2,PPBP,S100A8,RBP4,CPB2,CDA,PF4,GRB2,S100A9,PF4V1,WBP2,RGS10,PTK2,CD36,GPX3,RWDD1,PIK3C3
GO:BP,	defense response to fungus	GO:0050832	0.025872336249183066	1.5871643531034207	59	110	5	21128	LTF,HRG,S100A12,S100A8,S100A9
GO:BP,	positive regulation of platelet activation	GO:0010572	0.029713502183904034	1.5270461570315612	10	110	3	21128	SELP,GP5,GP1BA
GO:BP,	regulation of exocytosis	GO:0017157	0.03146936639181922	1.5021120011384723	215	110	8	21128	FGB,FGG,FGA,UNC13D,ITGB2,RAB27B,TSG101,VPS4A
GO:BP,	killing by host of symbiont cells	GO:0051873	0.03179846213288193	1.4975938832656779	30	110	4	21128	HRG,CFHR1,CFHR2,PF4
GO:BP,	chemotaxis	GO:0006935	0.03885200411640904	1.410586573922303	621	110	13	21128	HRG,ITGB3,BIN2,S100A12,PPBP,CORO1A,S100A8,LSP1,PF4,S100A9,ITGB2,PF4V1,PTK2
GO:BP,	taxis	GO:0042330	0.04017833081940358	1.3960081096728911	623	110	13	21128	HRG,ITGB3,BIN2,S100A12,PPBP,CORO1A,S100A8,LSP1,PF4,S100A9,ITGB2,PF4V1,PTK2
GO:BP,	regulation of opsonization	GO:1903027	0.04070109675333226	1.390393887887737	11	110	3	21128	C4BPA,COLEC11,C4BPB
GO:BP,	megakaryocyte differentiation	GO:0030219	0.04164078958468259	1.3804810440745776	65	110	5	21128	GP5,GP1BA,PTPN6,PF4,PITHD1
GO:BP,	cellular detoxification	GO:1990748	0.044375525848258025	1.352856487533612	110	110	6	21128	HBB,HBD,APOM,S100A9,CD36,GPX3
GO:BP,	zymogen activation	GO:0031638	0.04486825472184689	1.3480608232552629	66	110	5	21128	FGB,FGG,FGA,SERPINF2,CPB2
GO:BP,	neutrophil aggregation	GO:0070488	0.04974268258819893	1.3032707972358308	2	110	2	21128	S100A8,S100A9
GO:BP,	cell migration	GO:0016477	0.051361430984023716	1.2893628848650651	1502	110	21	21128	PLG,LCP1,HRG,ITGB3,SELP,BIN2,ARHGDIB,PDLIM1,S100A12,GP1BA,PPBP,CORO1A,S100A8,PECAM1,PF4,ITGA6,S100A9,ITGB2,PF4V1,PTPRC,PTK2
GO:BP,	negative regulation of humoral immune response mediated by circulating immunoglobulin	GO:0002924	0.05406233272929977	1.2671052189109622	12	110	3	21128	C4BPA,PTPN6,C4BPB
GO:BP,	peptidyl-tyrosine phosphorylation	GO:0018108	0.05415616984241305	1.2663520584131156	379	110	10	21128	HRG,ITGB3,PTPN6,PECAM1,ITGB2,PTPRC,PTK2,CD36,IL6ST,TSG101
GO:BP,	regulation of transport	GO:0051049	0.0551169072384862	1.2587151598766106	1754	110	23	21128	FGB,FGG,FGA,C4A,LCP1,ITGB3,CA2,CORO1A,S100A8,RBP4,PTPN6,CPB2,UNC13D,ITGB2,RAB27B,PTPRC,STOM,CD36,COLEC11,RUFY1,TSG101,PIK3C3,VPS4A
GO:BP,	peptidyl-tyrosine modification	GO:0018212	0.05662799101346737	1.2469688455294274	381	110	10	21128	HRG,ITGB3,PTPN6,PECAM1,ITGB2,PTPRC,PTK2,CD36,IL6ST,TSG101
GO:BP,	regulation of cell death	GO:0010941	0.059148758979678306	1.2280543630213718	1638	110	22	21128	FGB,FGG,FGA,VCP,HBB,LTF,HRG,ITGB3,HBD,CORO1A,S100A8,PTPN6,PF4,ITGA6,PTPA,S100A9,ITGB2,PTPRC,PTK2,CD36,IL6ST,VPS4A
GO:BP,	response to fungus	GO:0009620	0.05976824253289912	1.223529514276501	70	110	5	21128	LTF,HRG,S100A12,S100A8,S100A9
GO:BP,	integrin-mediated signaling pathway	GO:0007229	0.0660109801949169	1.1803838183757738	118	110	6	21128	ITGB3,ITGA2B,LIMS1,ITGA6,ITGB2,PTK2
GO:BP,	regulation of protein localization	GO:0032880	0.06740632739209326	1.1712993345849678	854	110	15	21128	FGB,FGG,FGA,LCP1,VCP,ITGB3,RBP4,PECAM1,ITGB2,STX7,STOM,CD36,TSG101,PIK3C3,VPS4A
GO:BP,	regulation of signal transduction	GO:0009966	0.06910215488895835	1.160508409329251	2991	110	32	21128	FGB,VWF,FGG,FGA,VCP,LTF,HRG,SERPINF2,ITGB3,SELP,ARHGDIB,S100A12,LIMS1,S100A8,PTPN6,MMP8,PF4,ITGA6,GRB2,S100A9,WBP2,RGS10,PTPRC,PTK2,S100A4,CD36,TGFB1I1,IL6ST,TSG101,GRAP2,RWDD1,ASH1L
GO:BP,	cellular response to toxic substance	GO:0097237	0.06922430647801196	1.159741386529029	119	110	6	21128	HBB,HBD,APOM,S100A9,CD36,GPX3
GO:BP,	negative regulation of immune effector process	GO:0002698	0.07602749492076438	1.1190293191280332	121	110	6	21128	A2M,C4BPA,MASP1,PTPN6,PTPRC,C4BPB
GO:BP,	regulation of MAPK cascade	GO:0043408	0.08914294251936047	1.0499130343868237	673	110	13	21128	FGB,FGG,FGA,SERPINF2,ITGB3,S100A12,PTPN6,MMP8,GRB2,PTPRC,CD36,GRAP2,ASH1L
GO:BP,	release of sequestered calcium ion into cytosol	GO:0051209	0.09540167551653672	1.020443997820053	126	110	6	21128	ITGB3,GP5,GP1BA,CORO1A,PTPN6,PTPRC
GO:BP,	negative regulation of sequestering of calcium ion	GO:0051283	0.09971238652014626	1.0012508891987293	127	110	6	21128	ITGB3,GP5,GP1BA,CORO1A,PTPN6,PTPRC
GO:BP,	bone cell development	GO:0098751	0.1018768825009039	0.9919243531996854	40	110	4	21128	LTF,GP5,GP1BA,PTPN6
GO:BP,	cell motility	GO:0048870	0.10263925712194595	0.9886864999399005	1699	110	22	21128	PLG,LCP1,HRG,ITGB3,SELP,BIN2,ARHGDIB,PDLIM1,S100A12,GP1BA,PPBP,CORO1A,S100A8,PECAM1,PF4,ITGA6,S100A9,ITGB2,PF4V1,PTPRC,PTK2,ASH1L
GO:BP,	negative regulation of multicellular organismal process	GO:0051241	0.10374684721410742	0.9840250922864295	1105	110	17	21128	FGB,FGG,FGA,PLG,LTF,HRG,SERPINF2,ARHGDIB,FGL1,GP1BA,RBP4,PTPN6,CPB2,MMP8,PF4,APOM,PTPRC
GO:BP,	positive regulation of immune effector process	GO:0002699	0.10600319325269833	0.9746810517999679	255	110	8	21128	RBP4,PTPN6,UNC13D,ITGB2,STX7,PTPRC,CD36,COLEC11
GO:BP,	regulation of molecular function	GO:0065009	0.10786614325419111	0.9671148491561404	3059	110	32	21128	A2M,C4A,VCP,LTF,HRG,SERPINF2,ITGB3,ARHGDIB,RSU1,S100A12,LIMS1,CFHR1,S100A8,PTPN6,MMP8,CFHR2,ITGA6,PTPA,IQGAP2,S100A9,ITGB2,RGS10,PTPRC,PTK2,STOM,CD36,RP2,PPP1R14A,ITSN2,TSG101,ASAP1,RWDD1
GO:BP,	regulation of sequestering of calcium ion	GO:0051282	0.10880119957748458	0.9633663163381128	129	110	6	21128	ITGB3,GP5,GP1BA,CORO1A,PTPN6,PTPRC
GO:BP,	positive regulation of heterotypic cell-cell adhesion	GO:0034116	0.11054407415996013	0.9564645333078635	15	110	3	21128	FGB,FGG,FGA
GO:BP,	carbon dioxide transport	GO:0015670	0.11054407415996013	0.9564645333078635	15	110	3	21128	HBB,CA2,HBD
GO:BP,	positive regulation of nitric oxide biosynthetic process	GO:0045429	0.11243956002433274	0.9490808624543008	41	110	4	21128	HBB,MMP8,ITGB2,CD36
GO:BP,	locomotion	GO:0040011	0.12389570026698328	0.9069437653166333	1353	110	19	21128	HRG,ITGB3,SELP,BIN2,ARHGDIB,S100A12,GP1BA,PPBP,CORO1A,S100A8,LSP1,PECAM1,PF4,ITGA6,S100A9,ITGB2,PF4V1,PTPRC,PTK2
GO:BP,	regulation of signaling	GO:0023051	0.12745942493384416	0.8946280452835937	3378	110	34	21128	FGB,VWF,FGG,FGA,VCP,LTF,HRG,SERPINF2,ITGB3,SELP,ARHGDIB,CA2,S100A12,LIMS1,S100A8,RBP4,PTPN6,MMP8,PF4,ITGA6,GRB2,S100A9,WBP2,RGS10,PTPRC,PTK2,S100A4,CD36,TGFB1I1,IL6ST,TSG101,GRAP2,RWDD1,ASH1L
GO:BP,	regulation of intracellular signal transduction	GO:1902531	0.12865609831672375	0.890569623347671	1725	110	22	21128	FGB,VWF,FGG,FGA,LTF,SERPINF2,ITGB3,SELP,ARHGDIB,S100A12,LIMS1,S100A8,PTPN6,MMP8,GRB2,S100A9,PTPRC,PTK2,S100A4,CD36,GRAP2,ASH1L
GO:BP,	sequestering of calcium ion	GO:0051208	0.12896411755670398	0.8895311091958713	133	110	6	21128	ITGB3,GP5,GP1BA,CORO1A,PTPN6,PTPRC
GO:BP,	regulation of cell communication	GO:0010646	0.13539014795404528	0.8684129371639118	3388	110	34	21128	FGB,VWF,FGG,FGA,VCP,LTF,HRG,SERPINF2,ITGB3,SELP,ARHGDIB,CA2,S100A12,LIMS1,S100A8,RBP4,PTPN6,MMP8,PF4,ITGA6,GRB2,S100A9,WBP2,RGS10,PTPRC,PTK2,S100A4,CD36,TGFB1I1,IL6ST,TSG101,GRAP2,RWDD1,ASH1L
GO:BP,	positive regulation of nitric oxide metabolic process	GO:1904407	0.13592899470600772	0.8666878950135184	43	110	4	21128	HBB,MMP8,ITGB2,CD36
GO:BP,	detoxification	GO:0098754	0.14010669765172612	0.8535411032319962	135	110	6	21128	HBB,HBD,APOM,S100A9,CD36,GPX3
GO:BP,	positive regulation of viral budding via host ESCRT complex	GO:1903774	0.14871946026866553	0.8276321993709455	3	110	2	21128	TSG101,VPS4A
GO:BP,	negative regulation of B cell mediated immunity	GO:0002713	0.16395932087733592	0.7852638892079167	17	110	3	21128	C4BPA,PTPN6,C4BPB
GO:BP,	opsonization	GO:0008228	0.16395932087733592	0.7852638892079167	17	110	3	21128	C4BPA,COLEC11,C4BPB
GO:BP,	negative regulation of immunoglobulin mediated immune response	GO:0002890	0.16395932087733592	0.7852638892079167	17	110	3	21128	C4BPA,PTPN6,C4BPB
GO:BP,	regulation of secretion	GO:0051046	0.17393783884488243	0.7596059302805203	620	110	12	21128	FGB,FGG,FGA,S100A8,RBP4,CPB2,UNC13D,ITGB2,RAB27B,TSG101,PIK3C3,VPS4A
GO:BP,	multivesicular body sorting pathway	GO:0071985	0.1933397201290329	0.7136789144102695	47	110	4	21128	VCP,RAB27B,TSG101,VPS4A
GO:BP,	chronic inflammatory response	GO:0002544	0.1960060454666506	0.7077305333766016	18	110	3	21128	S100A8,UNC13D,S100A9
GO:BP,	secretion	GO:0046903	0.21037359536785616	0.6770087707239067	945	110	15	21128	FGB,FGG,FGA,CA2,CORO1A,S100A8,RBP4,CPB2,UNC13D,CANX,ITGB2,RAB27B,TSG101,PIK3C3,VPS4A
GO:BP,	regulation of cell adhesion mediated by integrin	GO:0033628	0.2278344996694688	0.6423805125588302	49	110	4	21128	HRG,ITGB3,PTPN6,PTK2
GO:BP,	podosome assembly	GO:0071800	0.23187587143150418	0.6347444408805233	19	110	3	21128	LCP1,BIN2,ASAP1
GO:BP,	positive regulation of ERK1 and ERK2 cascade	GO:0070374	0.24175441368688322	0.6166255883003471	214	110	7	21128	FGB,FGG,FGA,SERPINF2,ITGB3,PTPRC,CD36
GO:BP,	exocytosis	GO:0006887	0.2552978118136849	0.5929529075667432	370	110	9	21128	FGB,FGG,FGA,CORO1A,UNC13D,ITGB2,RAB27B,TSG101,VPS4A
GO:BP,	regulation of cellular localization	GO:0060341	0.2588576444208037	0.5869390051818321	963	110	15	21128	FGB,FGG,FGA,LCP1,VCP,ITGB3,RBP4,PECAM1,ITGB2,STX7,STOM,CD36,TSG101,PIK3C3,VPS4A
GO:BP,	regulation of extrinsic apoptotic signaling pathway	GO:2001236	0.27900433364291327	0.554389050982363	153	110	6	21128	FGB,FGG,FGA,PF4,ITGA6,PTPRC
GO:BP,	regulation of catalytic activity	GO:0050790	0.280499199494479	0.5520683738218183	2356	110	26	21128	A2M,C4A,VCP,LTF,HRG,SERPINF2,ITGB3,ARHGDIB,RSU1,S100A12,LIMS1,S100A8,PTPN6,ITGA6,PTPA,IQGAP2,S100A9,ITGB2,RGS10,PTPRC,PTK2,RP2,PPP1R14A,ITSN2,TSG101,ASAP1
GO:BP,	cell-substrate junction assembly	GO:0007044	0.2847178870805399	0.5455852479343424	97	110	5	21128	HRG,ITGB3,LIMS1,ITGA6,PTK2
GO:BP,	regulation of viral budding via host ESCRT complex	GO:1903772	0.29642560960667935	0.5280842783229223	4	110	2	21128	TSG101,VPS4A
GO:BP,	negative regulation of extrinsic apoptotic signaling pathway	GO:2001237	0.29879207293667687	0.5246309286957496	98	110	5	21128	FGB,FGG,FGA,PF4,ITGA6
GO:BP,	positive regulation of peptide secretion	GO:0002793	0.29879207293667687	0.5246309286957496	98	110	5	21128	FGB,FGG,FGA,S100A8,RBP4
GO:BP,	leukocyte migration involved in inflammatory response	GO:0002523	0.31585624381914557	0.5005105335886766	21	110	3	21128	S100A8,S100A9,ITGB2
GO:BP,	regulation of secretion by cell	GO:1903530	0.3183273010121073	0.4971261129641174	563	110	11	21128	FGB,FGG,FGA,RBP4,CPB2,UNC13D,ITGB2,RAB27B,TSG101,PIK3C3,VPS4A
GO:BP,	positive regulation of NF-kappaB transcription factor activity	GO:0051092	0.32113146252820735	0.4933171427891283	157	110	6	21128	LTF,S100A12,S100A8,S100A9,ITGB2,CD36
GO:BP,	reactive oxygen species metabolic process	GO:0072593	0.3293031203628781	0.4824041540437588	225	110	7	21128	HBB,HBD,MMP8,GRB2,ITGB2,CD36,GPX3
GO:BP,	negative regulation of lymphocyte mediated immunity	GO:0002707	0.33334158781057055	0.4771105002310756	54	110	4	21128	C4BPA,PTPN6,PTPRC,C4BPB
GO:BP,	regulation of ERK1 and ERK2 cascade	GO:0070372	0.33375243162091234	0.4765755614754663	301	110	8	21128	FGB,FGG,FGA,SERPINF2,ITGB3,PTPN6,PTPRC,CD36
GO:BP,	cell death	GO:0008219	0.34676733647688657	0.4599618173547887	2113	110	24	21128	FGB,FGG,FGA,VCP,HBB,LTF,HRG,ITGB3,HBD,LCN2,CORO1A,S100A8,PTPN6,PF4,ITGA6,PTPA,S100A9,ITGB2,PTPRC,PTK2,CD36,COLEC11,IL6ST,VPS4A
GO:BP,	MAPK cascade	GO:0000165	0.35560904554122374	0.44902720051769673	773	110	13	21128	FGB,FGG,FGA,SERPINF2,ITGB3,S100A12,PTPN6,MMP8,GRB2,PTPRC,CD36,GRAP2,ASH1L
GO:BP,	cell-substrate junction organization	GO:0150115	0.3773122756159632	0.42329906507319026	103	110	5	21128	HRG,ITGB3,LIMS1,ITGA6,PTK2
GO:BP,	protein metabolic process	GO:0019538	0.377565742950614	0.42300741671090913	5482	110	46	21128	A2M,FGB,FGG,FGA,C4A,PLG,VCP,C4BPA,LTF,HRG,SERPINF2,ITGB3,F13B,S100A12,GP5,GP1BA,MASP1,S100A8,PTPN6,CPB2,MMP8,MLEC,PECAM1,CANX,H1-4,PTPA,CPN1,APOM,S100A9,ITGB2,WBP2,PTPRC,PTK2,CD36,COLEC11,C4BPB,PITHD1,TGFB1I1,IL6ST,GUSB,TSG101,MASP2,RWDD1,PIK3C3,VPS4A,ASH1L
GO:BP,	regulation of tumor necrosis factor production	GO:0032680	0.3806954663414573	0.419422295117894	162	110	6	21128	LTF,PTPN6,MMP8,PF4,PTPRC,CD36
GO:BP,	tumor necrosis factor production	GO:0032640	0.3806954663414573	0.419422295117894	162	110	6	21128	LTF,PTPN6,MMP8,PF4,PTPRC,CD36
GO:BP,	negative regulation of adaptive immune response based on somatic recombination of immune receptors built from immunoglobulin superfamily domains	GO:0002823	0.38405756551730214	0.41560367533873743	56	110	4	21128	C4BPA,PTPN6,PTPRC,C4BPB
GO:BP,	positive regulation of cell-matrix adhesion	GO:0001954	0.38405756551730214	0.41560367533873743	56	110	4	21128	HRG,ITGB3,LIMS1,CD36
GO:BP,	megakaryocyte development	GO:0035855	0.4174110029371995	0.3794361071346539	23	110	3	21128	GP5,GP1BA,PTPN6
GO:BP,	positive regulation of hydrolase activity	GO:0051345	0.42380690781704583	0.3728319688088592	582	110	11	21128	VCP,RSU1,LIMS1,S100A8,ITGA6,PTPA,S100A9,RGS10,PTPRC,RP2,ASAP1
GO:BP,	regulation of leukocyte mediated immunity	GO:0002703	0.429653195529444	0.366881953810656	235	110	7	21128	C4BPA,PTPN6,UNC13D,ITGB2,STX7,PTPRC,C4BPB
GO:BP,	regulation of nitric oxide biosynthetic process	GO:0045428	0.44010888518205105	0.3564398635511574	58	110	4	21128	HBB,MMP8,ITGB2,CD36
GO:BP,	tumor necrosis factor superfamily cytokine production	GO:0071706	0.4486550409163652	0.3480874483189688	167	110	6	21128	LTF,PTPN6,MMP8,PF4,PTPRC,CD36
GO:BP,	regulation of tumor necrosis factor superfamily cytokine production	GO:1903555	0.4486550409163652	0.3480874483189688	167	110	6	21128	LTF,PTPN6,MMP8,PF4,PTPRC,CD36
GO:BP,	gas transport	GO:0015669	0.4752368872229397	0.3230898573878949	24	110	3	21128	HBB,CA2,HBD
GO:BP,	regulation of heterotypic cell-cell adhesion	GO:0034114	0.4752368872229397	0.3230898573878949	24	110	3	21128	FGB,FGG,FGA
GO:BP,	positive regulation of leukocyte adhesion to vascular endothelial cell	GO:1904996	0.4752368872229397	0.3230898573878949	24	110	3	21128	SELP,GP1BA,ITGB2
GO:BP,	response to symbiotic bacterium	GO:0009609	0.492360245375643	0.3077170205477722	5	110	2	21128	C4BPA,C4BPB
GO:BP,	response to symbiont	GO:0009608	0.492360245375643	0.3077170205477722	5	110	2	21128	C4BPA,C4BPB
GO:BP,	autophagosome maturation	GO:0097352	0.5018156949845768	0.2994557596443649	60	110	4	21128	VCP,TSG101,PIK3C3,VPS4A
GO:BP,	regulation of protein transport	GO:0051223	0.5117112365570371	0.29097504634401083	498	110	10	21128	FGB,FGG,FGA,LCP1,RBP4,ITGB2,STOM,CD36,TSG101,PIK3C3
GO:BP,	response to lipid	GO:0033993	0.5153910553544847	0.287863122928883	913	110	14	21128	A2M,LTF,SELP,PPBP,S100A8,RBP4,PF4,CPN1,S100A9,PF4V1,WBP2,CD36,GPX3,RWDD1
GO:BP,	negative regulation of adaptive immune response	GO:0002820	0.534891088069902	0.2717346379141197	61	110	4	21128	C4BPA,PTPN6,PTPRC,C4BPB
GO:BP,	regulation of nitric oxide metabolic process	GO:0080164	0.534891088069902	0.2717346379141197	61	110	4	21128	HBB,MMP8,ITGB2,CD36
GO:BP,	cellular monoatomic cation homeostasis	GO:0030003	0.5366940622910656	0.27027320949867367	501	110	10	21128	ITGB3,CA2,LCN2,GP5,GP1BA,CORO1A,S100A8,PTPN6,S100A9,PTPRC
GO:BP,	one-carbon compound transport	GO:0019755	0.5379998322405658	0.2692178597555586	25	110	3	21128	HBB,CA2,HBD
GO:BP,	positive regulation of cellular component biogenesis	GO:0044089	0.5452455175146816	0.2634078960869805	502	110	10	21128	LCP1,VCP,HRG,SERPINF2,LIMS1,GRB2,CD36,TSG101,ASAP1,VPS4A
GO:BP,	ERK1 and ERK2 cascade	GO:0070371	0.5602860025886892	0.2515902272101529	325	110	8	21128	FGB,FGG,FGA,SERPINF2,ITGB3,PTPN6,PTPRC,CD36
GO:BP,	secretion by cell	GO:0032940	0.5723925015306071	0.24230606422954062	812	110	13	21128	FGB,FGG,FGA,CORO1A,RBP4,CPB2,UNC13D,CANX,ITGB2,RAB27B,TSG101,PIK3C3,VPS4A
GO:BP,	monoatomic cation homeostasis	GO:0055080	0.5816151259446403	0.23536430739511677	604	110	11	21128	LTF,ITGB3,CA2,LCN2,GP5,GP1BA,CORO1A,S100A8,PTPN6,S100A9,PTPRC
GO:BP,	response to lipopolysaccharide	GO:0032496	0.595813871797909	0.22488938971588196	328	110	8	21128	LTF,SELP,PPBP,S100A8,PF4,S100A9,PF4V1,CD36
GO:BP,	antibacterial humoral response	GO:0019731	0.6056902860996748	0.21774939138067706	63	110	4	21128	FGB,FGA,IGHM,LTF
GO:BP,	regulation of B cell mediated immunity	GO:0002712	0.6056902860996748	0.21774939138067706	63	110	4	21128	C4BPA,PTPN6,PTPRC,C4BPB
GO:BP,	regulation of immunoglobulin mediated immune response	GO:0002889	0.6056902860996748	0.21774939138067706	63	110	4	21128	C4BPA,PTPN6,PTPRC,C4BPB
GO:BP,	sequestering of metal ion	GO:0051238	0.6058745210644346	0.21761731057292755	26	110	3	21128	LCN2,S100A8,S100A9
GO:BP,	cellular monoatomic ion homeostasis	GO:0006873	0.6178589728256566	0.20911064192247478	510	110	10	21128	ITGB3,CA2,LCN2,GP5,GP1BA,CORO1A,S100A8,PTPN6,S100A9,PTPRC
GO:BP,	protein processing	GO:0016485	0.6251133934397359	0.20404119597056514	250	110	7	21128	FGB,FGG,FGA,SERPINF2,CPB2,CPN1,PIK3C3
GO:BP,	acute inflammatory response	GO:0002526	0.6552924560807423	0.18356483174073948	116	110	5	21128	A2M,SERPINF2,S100A8,IL6ST,ASH1L
GO:BP,	monoatomic ion homeostasis	GO:0050801	0.6682850977436077	0.1750382232095082	614	110	11	21128	LTF,ITGB3,CA2,LCN2,GP5,GP1BA,CORO1A,S100A8,PTPN6,S100A9,PTPRC
GO:BP,	regulation of defense response	GO:0031347	0.6720977707952369	0.1725675450588743	718	110	12	21128	A2M,LTF,S100A12,S100A8,PTPN6,MMP8,S100A9,PTPRC,CD36,COLEC11,IL6ST,ASH1L
GO:BP,	cellular metal ion homeostasis	GO:0006875	0.6865930796583785	0.1633005782498048	423	110	9	21128	ITGB3,LCN2,GP5,GP1BA,CORO1A,S100A8,PTPN6,S100A9,PTPRC
GO:BP,	calcium ion transmembrane import into cytosol	GO:0097553	0.7112582246671882	0.14797269858362364	182	110	6	21128	ITGB3,GP5,GP1BA,CORO1A,PTPN6,PTPRC
GO:BP,	negative regulation of leukocyte mediated immunity	GO:0002704	0.724129839330862	0.1401835561104709	66	110	4	21128	C4BPA,PTPN6,PTPRC,C4BPB
GO:BP,	induction of bacterial agglutination	GO:0043152	0.736026294864635	0.13310667002306667	6	110	2	21128	FGB,FGA
GO:BP,	positive regulation of catalytic activity	GO:0043085	0.741119620578908	0.13011168896457123	1181	110	16	21128	VCP,LTF,ITGB3,RSU1,S100A12,LIMS1,S100A8,ITGA6,PTPA,S100A9,ITGB2,RGS10,PTPRC,PTK2,RP2,ASAP1
GO:BP,	regulation of establishment of protein localization	GO:0070201	0.7530424791660866	0.12318052453359164	523	110	10	21128	FGB,FGG,FGA,LCP1,RBP4,ITGB2,STOM,CD36,TSG101,PIK3C3
GO:BP,	metal ion homeostasis	GO:0055065	0.7875119155456537	0.10374286634270896	526	110	10	21128	LTF,ITGB3,LCN2,GP5,GP1BA,CORO1A,S100A8,PTPN6,S100A9,PTPRC
GO:BP,	regulation of cell-matrix adhesion	GO:0001952	0.795669530671005	0.09926727247154837	121	110	5	21128	HRG,ITGB3,LIMS1,PTK2,CD36
GO:BP,	negative regulation of immune response	GO:0050777	0.7983378629245678	0.09781327287192251	186	110	6	21128	A2M,C4BPA,MASP1,PTPN6,PTPRC,C4BPB
GO:BP,	positive regulation of reactive oxygen species metabolic process	GO:2000379	0.8117365203254587	0.09058491452441582	68	110	4	21128	MMP8,GRB2,ITGB2,CD36
GO:BP,	negative regulation of extrinsic apoptotic signaling pathway via death domain receptors	GO:1902042	0.841870332348903	0.07475479482096827	29	110	3	21128	FGB,FGG,FGA
GO:BP,	hydrogen peroxide catabolic process	GO:0042744	0.841870332348903	0.07475479482096827	29	110	3	21128	HBB,HBD,GPX3
GO:BP,	anatomical structure homeostasis	GO:0060249	0.8471633697740134	0.0720328308148053	263	110	7	21128	LTF,ITGB3,AZGP1,CORO1A,RBP4,PECAM1,LYZ
GO:BP,	tissue homeostasis	GO:0001894	0.8471633697740134	0.0720328308148053	263	110	7	21128	LTF,ITGB3,AZGP1,CORO1A,RBP4,PECAM1,LYZ
GO:BP,	response to molecule of bacterial origin	GO:0002237	0.8660584658019628	0.06245278867769518	347	110	8	21128	LTF,SELP,PPBP,S100A8,PF4,S100A9,PF4V1,CD36
GO:BP,	positive regulation of molecular function	GO:0044093	0.9075437297238074	0.042132439437650875	1580	110	19	21128	VCP,LTF,ITGB3,RSU1,S100A12,LIMS1,S100A8,MMP8,ITGA6,PTPA,S100A9,ITGB2,RGS10,PTPRC,PTK2,CD36,RP2,ASAP1,RWDD1
GO:BP,	regulation of adaptive immune response	GO:0002819	0.9443285422511227	0.02487688360110814	192	110	6	21128	C4BPA,PTPN6,STX7,PTPRC,C4BPB,IL6ST
GO:BP,	regulation of peptide transport	GO:0090087	0.9443285422511227	0.02487688360110814	192	110	6	21128	FGB,FGG,FGA,CA2,S100A8,RBP4
GO:BP,	positive regulation of DNA-binding transcription factor activity	GO:0051091	0.9477104568839703	0.02332432741364831	268	110	7	21128	LTF,S100A12,S100A8,S100A9,ITGB2,CD36,RWDD1
GO:BP,	regulation of cytoskeleton organization	GO:0051493	0.9802220160817429	0.008675547328962955	541	110	10	21128	HRG,SERPINF2,ITGB3,ARHGDIB,CORO1A,S100A8,GRB2,IQGAP2,S100A9,PTK2
GO:BP,	positive regulation of leukocyte cell-cell adhesion	GO:1903039	0.9904994448859471	0.004145763520726968	270	110	7	21128	SELP,GP1BA,CORO1A,PTPN6,ITGB2,PTPRC,IL6ST
GO:BP,	labyrinthine layer development	GO:0060711	1	0	48	110	2	21128	PLG,GRB2
GO:BP,	regulation of protein tyrosine kinase activity	GO:0061097	1	0	95	110	3	21128	ITGB3,PTPRC,TSG101
GO:BP,	negative regulation of protein tyrosine kinase activity	GO:0061099	1	0	31	110	2	21128	PTPRC,TSG101
GO:BP,	negative regulation of response to cytokine stimulus	GO:0060761	1	0	79	110	2	21128	PTPRC,IL6ST
GO:BP,	regulation of Fc receptor mediated stimulatory signaling pathway	GO:0060368	1	0	11	110	1	21128	PTPRC
GO:BP,	cellular response to chemical stress	GO:0062197	1	0	332	110	2	21128	CD36,RWDD1
GO:BP,	regulation of response to cytokine stimulus	GO:0060759	1	0	163	110	3	21128	PTPN6,PTPRC,IL6ST
GO:BP,	labyrinthine layer blood vessel development	GO:0060716	1	0	20	110	1	21128	PLG
GO:BP,	response to growth hormone	GO:0060416	1	0	39	110	1	21128	PTK2
GO:BP,	membrane fission	GO:0090148	1	0	45	110	2	21128	TSG101,VPS4A
GO:BP,	positive regulation of small molecule metabolic process	GO:0062013	1	0	148	110	1	21128	VCP
GO:BP,	positive regulation of Fc receptor mediated stimulatory signaling pathway	GO:0060369	1	0	6	110	1	21128	PTPRC
GO:BP,	negative regulation of heart growth	GO:0061117	1	0	23	110	1	21128	RBP4
GO:BP,	regulation of canonical Wnt signaling pathway	GO:0060828	1	0	249	110	1	21128	VCP
GO:BP,	negative regulation of cellular response to growth factor stimulus	GO:0090288	1	0	104	110	1	21128	HRG
GO:BP,	regulation of proteasomal protein catabolic process	GO:0061136	1	0	196	110	2	21128	VCP,PITHD1
GO:BP,	labyrinthine layer morphogenesis	GO:0060713	1	0	22	110	1	21128	GRB2
GO:BP,	negative regulation of intracellular protein transport	GO:0090317	1	0	44	110	1	21128	CD36
GO:BP,	negative regulation of small molecule metabolic process	GO:0062014	1	0	101	110	1	21128	CDA
GO:BP,	growth hormone receptor signaling pathway	GO:0060396	1	0	27	110	1	21128	PTK2
GO:BP,	nucleic acid metabolic process	GO:0090304	1	0	7545	110	23	21128	VCP,LTF,SERPINF2,PDLIM1,S100A12,AZGP1,LIMS1,ENDOD1,S100A8,PF4,ITGA6,H1-4,S100A9,ITGB2,WBP2,PTPRC,CD36,PITHD1,TGFB1I1,TSG101,RWDD1,ZNF578,ASH1L
GO:BP,	actin filament bundle organization	GO:0061572	1	0	161	110	3	21128	LCP1,SERPINF2,PDLIM1
GO:BP,	regulation of small molecule metabolic process	GO:0062012	1	0	328	110	2	21128	VCP,CDA
GO:BP,	regulation of type I interferon-mediated signaling pathway	GO:0060338	1	0	40	110	1	21128	PTPN6
GO:BP,	uterus morphogenesis	GO:0061038	1	0	6	110	1	21128	ASH1L
GO:BP,	establishment of endothelial barrier	GO:0061028	1	0	49	110	1	21128	PECAM1
GO:BP,	protein-DNA complex assembly	GO:0065004	1	0	248	110	1	21128	H1-4
GO:BP,	membrane fusion	GO:0061025	1	0	181	110	4	21128	CORO1A,GCA,STX7,VPS4A
GO:BP,	trabecula formation	GO:0060343	1	0	26	110	1	21128	RBP4
GO:BP,	regulation of protein targeting to membrane	GO:0090313	1	0	35	110	2	21128	ITGB2,STOM
GO:BP,	heart trabecula formation	GO:0060347	1	0	15	110	1	21128	RBP4
GO:BP,	hepaticobiliary system development	GO:0061008	1	0	146	110	2	21128	FGL1,CPB2
GO:BP,	protein-containing complex assembly	GO:0065003	1	0	3283	110	15	21128	FGB,FGG,FGA,LCP1,VCP,HRG,SELP,BIN2,CORO1A,H1-4,GRB2,APOM,PTK2,CD36,ASAP1
GO:BP,	positive regulation of macrophage cytokine production	GO:0060907	1	0	24	110	1	21128	CD36
GO:BP,	bone development	GO:0060348	1	0	237	110	5	21128	LTF,GP5,GP1BA,PTPN6,PTPRC
GO:BP,	positive regulation of pattern recognition receptor signaling pathway	GO:0062208	1	0	46	110	1	21128	LTF
GO:BP,	positive regulation of protein targeting to membrane	GO:0090314	1	0	29	110	2	21128	ITGB2,STOM
GO:BP,	bone morphogenesis	GO:0060349	1	0	102	110	1	21128	LTF
GO:BP,	regulation of pattern recognition receptor signaling pathway	GO:0062207	1	0	103	110	2	21128	LTF,CD36
GO:BP,	positive regulation of intracellular protein transport	GO:0090316	1	0	157	110	2	21128	ITGB2,STOM
GO:BP,	regulation of dendritic spine development	GO:0060998	1	0	55	110	1	21128	ASAP1
GO:BP,	muscle structure development	GO:0061061	1	0	663	110	2	21128	PLG,PDLIM1
GO:BP,	positive regulation of myeloid leukocyte cytokine production involved in immune response	GO:0061081	1	0	34	110	1	21128	CD36
GO:BP,	dendritic spine development	GO:0060996	1	0	93	110	1	21128	ASAP1
GO:BP,	myeloid leukocyte cytokine production	GO:0061082	1	0	49	110	1	21128	CD36
GO:BP,	negative regulation of dendritic spine development	GO:0061000	1	0	12	110	1	21128	ASAP1
GO:BP,	establishment of protein localization to membrane	GO:0090150	1	0	489	110	2	21128	ITGB2,STOM
GO:BP,	cell differentiation involved in embryonic placenta development	GO:0060706	1	0	28	110	1	21128	PLG
GO:BP,	heart growth	GO:0060419	1	0	84	110	1	21128	RBP4
GO:BP,	protein localization to lysosome	GO:0061462	1	0	51	110	2	21128	PIK3C3,VPS4A
GO:BP,	early endosome to recycling endosome transport	GO:0061502	1	0	4	110	1	21128	CORO1A
GO:BP,	regulation of muscle system process	GO:0090257	1	0	233	110	1	21128	IL6ST
GO:BP,	late endosome to lysosome transport via multivesicular body sorting pathway	GO:0061764	1	0	2	110	1	21128	VPS4A
GO:BP,	myeloid cell development	GO:0061515	1	0	83	110	4	21128	LTF,GP5,GP1BA,PTPN6
GO:BP,	macrophage proliferation	GO:0061517	1	0	11	110	1	21128	PTK2
GO:BP,	negative regulation of platelet aggregation	GO:0090331	1	0	12	110	1	21128	FGG
GO:BP,	epithelium development	GO:0060429	1	0	1220	110	6	21128	CA2,PECAM1,GRB2,TGFB1I1,IL6ST,TSG101
GO:BP,	positive regulation of canonical Wnt signaling pathway	GO:0090263	1	0	102	110	1	21128	VCP
GO:BP,	mesenchyme development	GO:0060485	1	0	304	110	3	21128	PTK2,S100A4,TGFB1I1
GO:BP,	intestinal epithelial cell development	GO:0060576	1	0	14	110	1	21128	IL6ST
GO:BP,	regulation of cell projection assembly	GO:0060491	1	0	201	110	1	21128	HRG
GO:BP,	muscle tissue development	GO:0060537	1	0	408	110	1	21128	RBP4
GO:BP,	intestinal epithelial cell differentiation	GO:0060575	1	0	24	110	1	21128	IL6ST
GO:BP,	nucleic acid phosphodiester bond hydrolysis	GO:0090305	1	0	253	110	2	21128	AZGP1,ENDOD1
GO:BP,	respiratory system development	GO:0060541	1	0	214	110	1	21128	RBP4
GO:BP,	leukocyte adhesion to vascular endothelial cell	GO:0061756	1	0	48	110	3	21128	SELP,GP1BA,ITGB2
GO:BP,	regulation of peptide hormone secretion	GO:0090276	1	0	187	110	4	21128	FGB,FGG,FGA,RBP4
GO:BP,	late endosomal microautophagy	GO:0061738	1	0	3	110	1	21128	VPS4A
GO:BP,	negative regulation of cell death	GO:0060548	1	0	1001	110	11	21128	FGB,FGG,FGA,LTF,ITGB3,CORO1A,PF4,ITGA6,PTK2,IL6ST,VPS4A
GO:BP,	developmental growth involved in morphogenesis	GO:0060560	1	0	238	110	1	21128	ITSN2
GO:BP,	endoplasmic reticulum stress-induced pre-emptive quality control	GO:0061857	1	0	2	110	1	21128	VCP
GO:BP,	reproductive system development	GO:0061458	1	0	311	110	3	21128	A2M,RBP4,ASH1L
GO:BP,	glial cell activation	GO:0061900	1	0	52	110	3	21128	MMP8,ITGB2,PTPRC
GO:BP,	process utilizing autophagic mechanism	GO:0061919	1	0	562	110	6	21128	VCP,S100A8,S100A9,TSG101,PIK3C3,VPS4A
GO:BP,	organelle membrane fusion	GO:0090174	1	0	122	110	3	21128	CORO1A,STX7,VPS4A
GO:BP,	cytoskeleton-dependent cytokinesis	GO:0061640	1	0	119	110	1	21128	VPS4A
GO:BP,	regulation of cellular response to growth factor stimulus	GO:0090287	1	0	314	110	3	21128	HRG,ITGB3,TGFB1I1
GO:BP,	morphogenesis of a branching epithelium	GO:0061138	1	0	187	110	1	21128	GRB2
GO:BP,	penetration of cumulus oophorus	GO:0061956	1	0	1	110	1	21128	PITHD1
GO:BP,	placenta blood vessel development	GO:0060674	1	0	31	110	1	21128	PLG
GO:BP,	positive regulation of peptide hormone secretion	GO:0090277	1	0	96	110	4	21128	FGB,FGG,FGA,RBP4
GO:BP,	regulation of heart growth	GO:0060420	1	0	61	110	1	21128	RBP4
GO:BP,	trabecula morphogenesis	GO:0061383	1	0	48	110	1	21128	RBP4
GO:BP,	organophosphate biosynthetic process	GO:0090407	1	0	624	110	4	21128	VCP,CDA,PIK3C3,CKMT2
GO:BP,	trophoblast giant cell differentiation	GO:0060707	1	0	14	110	1	21128	PLG
GO:BP,	regulation of superoxide metabolic process	GO:0090322	1	0	28	110	2	21128	ITGB2,CD36
GO:BP,	regulation of platelet aggregation	GO:0090330	1	0	30	110	2	21128	FGG,IL6ST
GO:BP,	renal system vasculature development	GO:0061437	1	0	30	110	2	21128	ITGB3,PECAM1
GO:BP,	branching involved in labyrinthine layer morphogenesis	GO:0060670	1	0	13	110	1	21128	GRB2
GO:BP,	positive regulation of lipid kinase activity	GO:0090218	1	0	36	110	1	21128	PTK2
GO:BP,	embryonic placenta morphogenesis	GO:0060669	1	0	27	110	1	21128	GRB2
GO:BP,	kidney vasculature development	GO:0061440	1	0	30	110	2	21128	ITGB3,PECAM1
GO:BP,	phagosome maturation	GO:0090382	1	0	29	110	1	21128	CORO1A
GO:BP,	connective tissue development	GO:0061448	1	0	277	110	1	21128	ITGB3
GO:BP,	trophoblast cell migration	GO:0061450	1	0	16	110	2	21128	ITGB3,ARHGDIB
GO:BP,	midbody abscission	GO:0061952	1	0	19	110	1	21128	VPS4A
GO:BP,	heart trabecula morphogenesis	GO:0061384	1	0	33	110	1	21128	RBP4
GO:BP,	axon development	GO:0061564	1	0	496	110	1	21128	PTK2
GO:BP,	DNA biosynthetic process	GO:0071897	1	0	200	110	1	21128	VCP
GO:BP,	regulation of biological quality	GO:0065008	1	0	2790	110	25	21128	FGB,VWF,FGG,FGA,PLG,VCP,HBB,HRG,SERPINF2,ITGB3,SELP,F13B,GP5,GP1BA,CORO1A,RBP4,PTPN6,CPB2,PF4,GRB2,PF4V1,PTK2,CD36,C4BPB,IL6ST
GO:BP,	cellular response to growth hormone stimulus	GO:0071378	1	0	27	110	1	21128	PTK2
GO:BP,	positive regulation of glomerular mesangial cell proliferation	GO:0072126	1	0	7	110	1	21128	ITGB3
GO:BP,	regulation of glomerular mesangial cell proliferation	GO:0072124	1	0	10	110	1	21128	ITGB3
GO:BP,	cellular response to steroid hormone stimulus	GO:0071383	1	0	213	110	2	21128	WBP2,RWDD1
GO:BP,	cellular response to estrogen stimulus	GO:0071391	1	0	19	110	1	21128	WBP2
GO:BP,	cellular response to testosterone stimulus	GO:0071394	1	0	11	110	1	21128	RWDD1
GO:BP,	cellular response to lipid	GO:0071396	1	0	598	110	7	21128	LTF,PPBP,PF4,PF4V1,WBP2,CD36,RWDD1
GO:BP,	cell proliferation involved in kidney development	GO:0072111	1	0	21	110	1	21128	ITGB3
GO:BP,	cellular response to lipoprotein particle stimulus	GO:0071402	1	0	32	110	2	21128	ITGB2,CD36
GO:BP,	glomerular mesangial cell proliferation	GO:0072110	1	0	11	110	1	21128	ITGB3
GO:BP,	cellular response to low-density lipoprotein particle stimulus	GO:0071404	1	0	28	110	2	21128	ITGB2,CD36
GO:BP,	cellular response to organic cyclic compound	GO:0071407	1	0	579	110	2	21128	WBP2,RWDD1
GO:BP,	cellular response to organonitrogen compound	GO:0071417	1	0	642	110	5	21128	ITGB3,CA2,GRB2,PTK2,CD36
GO:BP,	regulation of histone H3-K14 acetylation	GO:0071440	1	0	6	110	1	21128	WBP2
GO:BP,	glomerular mesangium development	GO:0072109	1	0	16	110	1	21128	ITGB3
GO:BP,	regulation of stem cell proliferation	GO:0072091	1	0	90	110	1	21128	PTPRC
GO:BP,	stem cell proliferation	GO:0072089	1	0	123	110	1	21128	PTPRC
GO:BP,	positive regulation of histone H3-K14 acetylation	GO:0071442	1	0	4	110	1	21128	WBP2
GO:BP,	cellular response to hydroperoxide	GO:0071447	1	0	8	110	1	21128	CD36
GO:BP,	cellular response to peptide hormone stimulus	GO:0071375	1	0	302	110	4	21128	ITGB3,CA2,GRB2,PTK2
GO:BP,	kidney epithelium development	GO:0072073	1	0	149	110	1	21128	PECAM1
GO:BP,	cellular response to growth factor stimulus	GO:0071363	1	0	675	110	7	21128	HRG,ITGB3,LIMS1,CORO1A,GRB2,PTK2,TGFB1I1
GO:BP,	cellular response to tumor necrosis factor	GO:0071356	1	0	225	110	1	21128	LIMS1
GO:BP,	cellular response to lipopolysaccharide	GO:0071222	1	0	209	110	5	21128	LTF,PPBP,PF4,PF4V1,CD36
GO:BP,	cellular response to lipoteichoic acid	GO:0071223	1	0	10	110	1	21128	CD36
GO:BP,	cellular response to arsenic-containing substance	GO:0071243	1	0	20	110	1	21128	VCP
GO:BP,	purine-containing compound metabolic process	GO:0072521	1	0	587	110	2	21128	VCP,DPYD
GO:BP,	cellular response to mechanical stimulus	GO:0071260	1	0	75	110	1	21128	ITGB3
GO:BP,	flavin adenine dinucleotide catabolic process	GO:0072389	1	0	1	110	1	21128	VCP
GO:BP,	flavin adenine dinucleotide metabolic process	GO:0072387	1	0	3	110	1	21128	VCP
GO:BP,	cellular response to organic substance	GO:0071310	1	0	1993	110	21	21128	FGB,FGG,VCP,LTF,ITGB3,CA2,PPBP,LIMS1,CORO1A,PTPN6,LSP1,CPB2,PF4,GRB2,PF4V1,WBP2,PTPRC,PTK2,CD36,IL6ST,RWDD1
GO:BP,	cellular response to carbohydrate stimulus	GO:0071322	1	0	153	110	1	21128	CPB2
GO:BP,	cellular response to monosaccharide stimulus	GO:0071326	1	0	141	110	1	21128	CPB2
GO:BP,	blood coagulation, common pathway	GO:0072377	1	0	2	110	1	21128	FGA
GO:BP,	cellular response to hexose stimulus	GO:0071331	1	0	139	110	1	21128	CPB2
GO:BP,	cellular response to glucose stimulus	GO:0071333	1	0	137	110	1	21128	CPB2
GO:BP,	cellular response to cytokine stimulus	GO:0071345	1	0	823	110	11	21128	FGB,FGG,PPBP,LIMS1,CORO1A,PTPN6,LSP1,PF4,PF4V1,PTPRC,IL6ST
GO:BP,	cellular response to interleukin-1	GO:0071347	1	0	106	110	2	21128	FGB,FGG
GO:BP,	circulatory system development	GO:0072359	1	0	1118	110	11	21128	PLG,HRG,SERPINF2,ITGB3,ITGA2B,PDLIM1,RBP4,PECAM1,PF4,ITGB2,PTK2
GO:BP,	cellular response to interleukin-4	GO:0071353	1	0	32	110	1	21128	CORO1A
GO:BP,	cellular response to interleukin-6	GO:0071354	1	0	33	110	2	21128	FGG,IL6ST
GO:BP,	vesicle uncoating	GO:0072319	1	0	9	110	1	21128	VPS4A
GO:BP,	cellular response to type I interferon	GO:0071357	1	0	77	110	1	21128	PTPN6
GO:BP,	cellular response to bacterial lipopeptide	GO:0071221	1	0	6	110	1	21128	CD36
GO:BP,	cellular response to oxygen radical	GO:0071450	1	0	21	110	1	21128	CD36
GO:BP,	cellular response to xenobiotic stimulus	GO:0071466	1	0	183	110	2	21128	ITGB3,S100A12
GO:BP,	membrane assembly	GO:0071709	1	0	60	110	1	21128	VPS4A
GO:BP,	ER-associated misfolded protein catabolic process	GO:0071712	1	0	12	110	1	21128	VCP
GO:BP,	response to diacyl bacterial lipopeptide	GO:0071724	1	0	4	110	1	21128	CD36
GO:BP,	cellular response to diacyl bacterial lipopeptide	GO:0071726	1	0	4	110	1	21128	CD36
GO:BP,	nephron development	GO:0072006	1	0	154	110	2	21128	ITGB3,PECAM1
GO:BP,	renal system development	GO:0072001	1	0	323	110	3	21128	ITGB3,RBP4,PECAM1
GO:BP,	nuclear membrane organization	GO:0071763	1	0	46	110	1	21128	VPS4A
GO:BP,	response to fibroblast growth factor	GO:0071774	1	0	112	110	1	21128	GRB2
GO:BP,	extracellular exosome assembly	GO:0071971	1	0	7	110	1	21128	TSG101
GO:BP,	regulation of podosome assembly	GO:0071801	1	0	14	110	2	21128	LCP1,ASAP1
GO:BP,	positive regulation of podosome assembly	GO:0071803	1	0	11	110	2	21128	LCP1,ASAP1
GO:BP,	protein transmembrane transport	GO:0071806	1	0	64	110	1	21128	AZGP1
GO:BP,	positive regulation of protein serine/threonine kinase activity	GO:0071902	1	0	227	110	3	21128	LTF,S100A12,PTPRC
GO:BP,	protein-DNA complex subunit organization	GO:0071824	1	0	269	110	1	21128	H1-4
GO:BP,	protein-lipid complex subunit organization	GO:0071825	1	0	48	110	1	21128	APOM
GO:BP,	ribonucleoprotein complex subunit organization	GO:0071826	1	0	1641	110	1	21128	VCP
GO:BP,	plasma lipoprotein particle organization	GO:0071827	1	0	45	110	1	21128	APOM
GO:BP,	negative regulation of protein serine/threonine kinase activity	GO:0071901	1	0	113	110	1	21128	PTPN6
GO:BP,	cellular component organization or biogenesis	GO:0071840	1	0	8262	110	52	21128	FGB,FGG,FGA,PLG,LCP1,VCP,IGHM,IGHG2,HRG,SERPINF2,IGHG4,ITGB3,SELP,BIN2,ARHGDIB,PDLIM1,LIMS1,CORO1A,IGLC2,S100A8,CPB2,MANF,MMP8,CDA,PECAM1,ITGA6,H1-4,GRB2,PTPA,IQGAP2,APOM,S100A9,GCA,ITGB2,STX7,WBP2,PTPRC,IGHV3-23,PTK2,IGHV3-7,CD36,IGHV5-51,RP2,RUFY1,ITSN2,IGHV2-26,IGHV2-70D,TSG101,ASAP1,PIK3C3,VPS4A,ASH1L
GO:BP,	nitrogen compound transport	GO:0071705	1	0	2252	110	23	21128	FGB,FGG,FGA,LCP1,VCP,HBB,HRG,ITGB3,CA2,AZGP1,S100A8,RBP4,CANX,ITGB2,STX7,RAB27B,STOM,CD36,RP2,RUFY1,TSG101,PIK3C3,VPS4A
GO:BP,	cellular response to superoxide	GO:0071451	1	0	21	110	1	21128	CD36
GO:BP,	organic substance metabolic process	GO:0071704	1	0	13937	110	58	21128	A2M,FGB,FGG,FGA,C4A,PLG,VCP,C4BPA,LTF,HRG,SERPINF2,ITGB3,PDLIM1,F13B,S100A12,AZGP1,GP5,GP1BA,LIMS1,ENDOD1,MASP1,S100A8,RBP4,PTPN6,CPB2,MMP8,MLEC,CDA,PECAM1,CANX,PF4,ITGA6,H1-4,PTPA,CPN1,APOM,S100A9,ITGB2,WBP2,PTPRC,PTK2,CD36,COLEC11,PLBD1,C4BPB,PITHD1,TGFB1I1,IL6ST,GUSB,TSG101,MASP2,RWDD1,DPYD,PIK3C3,VPS4A,CKMT2,ZNF578,ASH1L
GO:BP,	nephron epithelium development	GO:0072009	1	0	119	110	1	21128	PECAM1
GO:BP,	cellular response to radiation	GO:0071478	1	0	189	110	1	21128	GRB2
GO:BP,	cellular response to ionizing radiation	GO:0071479	1	0	75	110	1	21128	GRB2
GO:BP,	cellular response to endogenous stimulus	GO:0071495	1	0	1445	110	12	21128	FGB,HRG,ITGB3,CA2,LIMS1,CORO1A,GRB2,WBP2,PTK2,CD36,TGFB1I1,RWDD1
GO:BP,	cellular response to external stimulus	GO:0071496	1	0	328	110	4	21128	ITGB3,CDA,PTPRC,PIK3C3
GO:BP,	dopaminergic neuron differentiation	GO:0071542	1	0	43	110	1	21128	MANF
GO:BP,	glomerulus vasculature development	GO:0072012	1	0	28	110	2	21128	ITGB3,PECAM1
GO:BP,	glomerular endothelium development	GO:0072011	1	0	4	110	1	21128	PECAM1
GO:BP,	response to transforming growth factor beta	GO:0071559	1	0	263	110	3	21128	LIMS1,PTK2,TGFB1I1
GO:BP,	cellular response to transforming growth factor beta stimulus	GO:0071560	1	0	257	110	3	21128	LIMS1,PTK2,TGFB1I1
GO:BP,	transforming growth factor beta production	GO:0071604	1	0	41	110	1	21128	SERPINF2
GO:BP,	glomerular epithelium development	GO:0072010	1	0	26	110	1	21128	PECAM1
GO:BP,	regulation of granulocyte chemotaxis	GO:0071622	1	0	52	110	1	21128	PTK2
GO:BP,	regulation of transforming growth factor beta production	GO:0071634	1	0	38	110	1	21128	SERPINF2
GO:BP,	positive regulation of transforming growth factor beta production	GO:0071636	1	0	20	110	1	21128	SERPINF2
GO:BP,	mononuclear cell migration	GO:0071674	1	0	205	110	6	21128	PLG,ITGB3,S100A12,CORO1A,PECAM1,PTK2
GO:BP,	regulation of mononuclear cell migration	GO:0071675	1	0	123	110	3	21128	ITGB3,CORO1A,PTK2
GO:BP,	positive regulation of mononuclear cell migration	GO:0071677	1	0	75	110	2	21128	ITGB3,CORO1A
GO:BP,	protein localization to extracellular region	GO:0071692	1	0	359	110	6	21128	FGB,FGG,FGA,RBP4,CANX,PIK3C3
GO:BP,	anatomical structure maturation	GO:0071695	1	0	253	110	2	21128	FGG,LTF
GO:BP,	organic substance transport	GO:0071702	1	0	2680	110	26	21128	FGB,FGG,FGA,LCP1,VCP,HBB,HRG,ITGB3,CA2,HBD,AZGP1,PPBP,S100A8,RBP4,CANX,APOM,ITGB2,STX7,RAB27B,STOM,CD36,RP2,RUFY1,TSG101,PIK3C3,VPS4A
GO:BP,	cellular response to bacterial lipoprotein	GO:0071220	1	0	6	110	1	21128	CD36
GO:BP,	cellular response to molecule of bacterial origin	GO:0071219	1	0	218	110	5	21128	LTF,PPBP,PF4,PF4V1,CD36
GO:BP,	cellular response to misfolded protein	GO:0071218	1	0	23	110	1	21128	VCP
GO:BP,	establishment of protein localization to chromosome	GO:0070199	1	0	27	110	1	21128	WBP2
GO:BP,	lytic vacuole organization	GO:0080171	1	0	99	110	1	21128	CORO1A
GO:BP,	extracellular matrix constituent secretion	GO:0070278	1	0	14	110	1	21128	CPB2
GO:BP,	renal absorption	GO:0070293	1	0	30	110	1	21128	HBB
GO:BP,	regulation of cellular response to stress	GO:0080135	1	0	711	110	4	21128	SERPINF2,MANF,MMP8,CD36
GO:BP,	regulation of primary metabolic process	GO:0080090	1	0	5882	110	34	21128	A2M,C4A,VCP,C4BPA,LTF,HRG,SERPINF2,ITGB3,PDLIM1,S100A12,LIMS1,S100A8,PTPN6,CPB2,CDA,PECAM1,PF4,ITGA6,H1-4,PTPA,S100A9,ITGB2,WBP2,PTPRC,PTK2,CD36,C4BPB,PITHD1,TGFB1I1,IL6ST,TSG101,RWDD1,ZNF578,ASH1L
GO:BP,	regulation of stress-activated protein kinase signaling cascade	GO:0070302	1	0	196	110	2	21128	SERPINF2,MMP8
GO:BP,	positive regulation of stress-activated protein kinase signaling cascade	GO:0070304	1	0	130	110	2	21128	SERPINF2,MMP8
GO:BP,	response to bacterial lipopeptide	GO:0070339	1	0	6	110	1	21128	CD36
GO:BP,	negative regulation of ERK1 and ERK2 cascade	GO:0070373	1	0	73	110	1	21128	PTPRC
GO:BP,	response to lipoteichoic acid	GO:0070391	1	0	10	110	1	21128	CD36
GO:BP,	regulation of protein serine/threonine kinase activity	GO:0071900	1	0	386	110	5	21128	LTF,S100A12,PTPN6,PTPRC,TSG101
GO:BP,	thymocyte migration	GO:0072679	1	0	7	110	1	21128	CORO1A
GO:BP,	leukocyte aggregation	GO:0070486	1	0	13	110	2	21128	S100A8,S100A9
GO:BP,	T cell migration	GO:0072678	1	0	73	110	2	21128	ITGB3,CORO1A
GO:BP,	thrombin-activated receptor signaling pathway	GO:0070493	1	0	12	110	2	21128	GP1BA,IQGAP2
GO:BP,	cholesterol import	GO:0070508	1	0	10	110	1	21128	CD36
GO:BP,	lymphocyte migration	GO:0072676	1	0	123	110	2	21128	ITGB3,CORO1A
GO:BP,	neutrophil extravasation	GO:0072672	1	0	14	110	1	21128	PECAM1
GO:BP,	positive regulation of biomineral tissue development	GO:0070169	1	0	54	110	1	21128	LTF
GO:BP,	establishment of protein localization to vacuole	GO:0072666	1	0	58	110	3	21128	TSG101,PIK3C3,VPS4A
GO:BP,	regulation of biomineral tissue development	GO:0070167	1	0	101	110	1	21128	LTF
GO:BP,	regulation of anatomical structure size	GO:0090066	1	0	511	110	7	21128	FGB,FGG,FGA,HBB,SERPINF2,CORO1A,GRB2
GO:BP,	epithelium migration	GO:0090132	1	0	304	110	5	21128	HRG,ITGB3,CORO1A,ITGB2,PTK2
GO:BP,	neuron cellular homeostasis	GO:0070050	1	0	42	110	1	21128	CA2
GO:BP,	tissue migration	GO:0090130	1	0	310	110	5	21128	HRG,ITGB3,CORO1A,ITGB2,PTK2
GO:BP,	glycosylation	GO:0070085	1	0	249	110	1	21128	MLEC
GO:BP,	ubiquitin-dependent endocytosis	GO:0070086	1	0	5	110	1	21128	TSG101
GO:BP,	chemokine-mediated signaling pathway	GO:0070098	1	0	90	110	3	21128	PPBP,PF4,PF4V1
GO:BP,	regulation of cell-substrate junction assembly	GO:0090109	1	0	64	110	3	21128	HRG,LIMS1,PTK2
GO:BP,	negative regulation of transmembrane receptor protein serine/threonine kinase signaling pathway	GO:0090101	1	0	146	110	1	21128	TGFB1I1
GO:BP,	positive regulation of transmembrane receptor protein serine/threonine kinase signaling pathway	GO:0090100	1	0	116	110	1	21128	TGFB1I1
GO:BP,	regulation of transmembrane receptor protein serine/threonine kinase signaling pathway	GO:0090092	1	0	273	110	1	21128	TGFB1I1
GO:BP,	regulation of dipeptide transport	GO:0090089	1	0	2	110	1	21128	CA2
GO:BP,	interleukin-6-mediated signaling pathway	GO:0070102	1	0	18	110	1	21128	IL6ST
GO:BP,	regulation of oligopeptide transport	GO:0090088	1	0	2	110	1	21128	CA2
GO:BP,	regulation of interleukin-6-mediated signaling pathway	GO:0070103	1	0	5	110	1	21128	IL6ST
GO:BP,	regulation of protein deubiquitination	GO:0090085	1	0	12	110	1	21128	VCP
GO:BP,	foam cell differentiation	GO:0090077	1	0	36	110	3	21128	ITGB3,PF4,CD36
GO:BP,	negative regulation of interleukin-6-mediated signaling pathway	GO:0070104	1	0	2	110	1	21128	IL6ST
GO:BP,	interleukin-27-mediated signaling pathway	GO:0070106	1	0	7	110	1	21128	IL6ST
GO:BP,	ciliary neurotrophic factor-mediated signaling pathway	GO:0070120	1	0	5	110	1	21128	IL6ST
GO:BP,	histone H3-K4 trimethylation	GO:0080182	1	0	22	110	1	21128	H1-4
GO:BP,	protein K63-linked deubiquitination	GO:0070536	1	0	38	110	1	21128	VCP
GO:BP,	protein localization to vacuole	GO:0072665	1	0	77	110	3	21128	TSG101,PIK3C3,VPS4A
GO:BP,	protein localization to plasma membrane	GO:0072659	1	0	284	110	2	21128	STX7,VPS4A
GO:BP,	negative regulation of leukocyte proliferation	GO:0070664	1	0	96	110	1	21128	PTPN6
GO:BP,	positive regulation of leukocyte proliferation	GO:0070665	1	0	165	110	4	21128	CORO1A,PTPRC,PTK2,IL6ST
GO:BP,	response to interleukin-4	GO:0070670	1	0	35	110	1	21128	CORO1A
GO:BP,	cellular macromolecule localization	GO:0070727	1	0	2718	110	22	21128	FGB,FGG,FGA,LCP1,VCP,ITGB3,AZGP1,LIMS1,RBP4,PECAM1,CANX,ITGB2,STX7,WBP2,RAB27B,STOM,CD36,RP2,RUFY1,TSG101,PIK3C3,VPS4A
GO:BP,	histone H3-K27 methylation	GO:0070734	1	0	18	110	1	21128	H1-4
GO:BP,	response to interleukin-6	GO:0070741	1	0	36	110	2	21128	FGG,IL6ST
GO:BP,	bicellular tight junction assembly	GO:0070830	1	0	66	110	1	21128	PECAM1
GO:BP,	inclusion body assembly	GO:0070841	1	0	25	110	1	21128	VCP
GO:BP,	aggresome assembly	GO:0070842	1	0	6	110	1	21128	VCP
GO:BP,	response to growth factor	GO:0070848	1	0	705	110	7	21128	HRG,ITGB3,LIMS1,CORO1A,GRB2,PTK2,TGFB1I1
GO:BP,	type I interferon-mediated signaling pathway	GO:0060337	1	0	75	110	1	21128	PTPN6
GO:BP,	organelle assembly	GO:0070925	1	0	944	110	9	21128	LCP1,BIN2,CORO1A,STX7,RP2,TSG101,ASAP1,PIK3C3,VPS4A
GO:BP,	bone maturation	GO:0070977	1	0	29	110	1	21128	LTF
GO:BP,	neuron death	GO:0070997	1	0	367	110	3	21128	CORO1A,ITGB2,IL6ST
GO:BP,	protein localization to chromatin	GO:0071168	1	0	54	110	2	21128	VCP,WBP2
GO:BP,	establishment of protein localization to chromatin	GO:0071169	1	0	9	110	1	21128	WBP2
GO:BP,	cellular response to abiotic stimulus	GO:0071214	1	0	336	110	2	21128	ITGB3,GRB2
GO:BP,	cellular response to biotic stimulus	GO:0071216	1	0	246	110	6	21128	LTF,PPBP,CDA,PF4,PF4V1,CD36
GO:BP,	cellular response to external biotic stimulus	GO:0071217	1	0	1	110	1	21128	CDA
GO:BP,	regulation of leukocyte proliferation	GO:0070663	1	0	267	110	5	21128	CORO1A,PTPN6,PTPRC,PTK2,IL6ST
GO:BP,	leukocyte proliferation	GO:0070661	1	0	347	110	5	21128	CORO1A,PTPN6,PTPRC,PTK2,IL6ST
GO:BP,	purine-containing compound biosynthetic process	GO:0072522	1	0	287	110	1	21128	VCP
GO:BP,	purine-containing compound catabolic process	GO:0072523	1	0	58	110	1	21128	DPYD
GO:BP,	response to fatty acid	GO:0070542	1	0	63	110	1	21128	CD36
GO:BP,	response to linoleic acid	GO:0070543	1	0	3	110	1	21128	CD36
GO:BP,	response to interleukin-1	GO:0070555	1	0	133	110	2	21128	FGB,FGG
GO:BP,	protein localization to membrane	GO:0072657	1	0	808	110	4	21128	ITGB2,STX7,STOM,VPS4A
GO:BP,	establishment of protein localization to organelle	GO:0072594	1	0	664	110	5	21128	WBP2,CD36,TSG101,PIK3C3,VPS4A
GO:BP,	clathrin-dependent endocytosis	GO:0072583	1	0	47	110	2	21128	CANX,ITSN2
GO:BP,	endothelial cell apoptotic process	GO:0072577	1	0	56	110	3	21128	FGB,FGG,FGA
GO:BP,	liver morphogenesis	GO:0072576	1	0	25	110	2	21128	FGL1,CPB2
GO:BP,	calcium ion transmembrane transport	GO:0070588	1	0	343	110	6	21128	ITGB3,GP5,GP1BA,CORO1A,PTPN6,PTPRC
GO:BP,	protein-lipid complex assembly	GO:0065005	1	0	29	110	1	21128	APOM
GO:BP,	epithelial cell proliferation involved in liver morphogenesis	GO:0072575	1	0	24	110	2	21128	FGL1,CPB2
GO:BP,	blood microparticle formation	GO:0072564	1	0	2	110	1	21128	CD36
GO:BP,	tumor necrosis factor (ligand) superfamily member 11 production	GO:0072535	1	0	3	110	1	21128	LTF
GO:BP,	pyrimidine-containing compound catabolic process	GO:0072529	1	0	38	110	2	21128	CDA,DPYD
GO:BP,	regulation of protein processing	GO:0070613	1	0	67	110	2	21128	SERPINF2,CPB2
GO:BP,	protein modification by small protein removal	GO:0070646	1	0	185	110	1	21128	VCP
GO:BP,	pyrimidine-containing compound biosynthetic process	GO:0072528	1	0	44	110	1	21128	CDA
GO:BP,	pyrimidine-containing compound metabolic process	GO:0072527	1	0	89	110	2	21128	CDA,DPYD
GO:BP,	pyridine-containing compound metabolic process	GO:0072524	1	0	90	110	1	21128	VCP
GO:BP,	protein modification by small protein conjugation or removal	GO:0070647	1	0	1052	110	2	21128	VCP,TSG101
GO:BP,	hepatocyte proliferation	GO:0072574	1	0	24	110	2	21128	FGL1,CPB2
GO:BP,	response to oxygen levels	GO:0070482	1	0	331	110	1	21128	PDLIM1
GO:BP,	positive regulation of stress fiber assembly	GO:0051496	1	0	52	110	1	21128	SERPINF2
GO:BP,	cilium movement involved in cell motility	GO:0060294	1	0	148	110	1	21128	ASH1L
GO:BP,	phosphatidylinositol phosphate biosynthetic process	GO:0046854	1	0	66	110	1	21128	PIK3C3
GO:BP,	isoprenoid transport	GO:0046864	1	0	5	110	1	21128	RBP4
GO:BP,	terpenoid transport	GO:0046865	1	0	5	110	1	21128	RBP4
GO:BP,	hormone secretion	GO:0046879	1	0	298	110	4	21128	FGB,FGG,FGA,RBP4
GO:BP,	regulation of hormone secretion	GO:0046883	1	0	242	110	4	21128	FGB,FGG,FGA,RBP4
GO:BP,	positive regulation of hormone secretion	GO:0046887	1	0	127	110	4	21128	FGB,FGG,FGA,RBP4
GO:BP,	response to cycloheximide	GO:0046898	1	0	4	110	1	21128	CDA
GO:BP,	intracellular transport	GO:0046907	1	0	1806	110	12	21128	LCP1,VCP,CORO1A,ITGB2,STX7,RAB27B,STOM,CD36,ITSN2,TSG101,PIK3C3,VPS4A
GO:BP,	cellular transition metal ion homeostasis	GO:0046916	1	0	113	110	3	21128	LCN2,S100A8,S100A9
GO:BP,	carboxylic acid transport	GO:0046942	1	0	290	110	1	21128	CD36
GO:BP,	regulation of bone remodeling	GO:0046850	1	0	50	110	1	21128	ITGB3
GO:BP,	antigen processing and presentation of peptide antigen	GO:0048002	1	0	63	110	1	21128	AZGP1
GO:BP,	vascular endothelial growth factor receptor signaling pathway	GO:0048010	1	0	55	110	2	21128	ITGB3,PTK2
GO:BP,	ephrin receptor signaling pathway	GO:0048013	1	0	52	110	1	21128	PTK2
GO:BP,	phosphatidylinositol-mediated signaling	GO:0048015	1	0	176	110	4	21128	SELP,PTPN6,PTK2,PIK3C3
GO:BP,	inositol lipid-mediated signaling	GO:0048017	1	0	180	110	4	21128	SELP,PTPN6,PTK2,PIK3C3
GO:BP,	focal adhesion assembly	GO:0048041	1	0	86	110	3	21128	HRG,LIMS1,PTK2
GO:BP,	fibroblast proliferation	GO:0048144	1	0	107	110	1	21128	ITGB3
GO:BP,	regulation of fibroblast proliferation	GO:0048145	1	0	90	110	1	21128	ITGB3
GO:BP,	positive regulation of fibroblast proliferation	GO:0048146	1	0	54	110	1	21128	ITGB3
GO:BP,	Golgi vesicle transport	GO:0048193	1	0	305	110	2	21128	VCP,RP2
GO:BP,	male gamete generation	GO:0048232	1	0	616	110	1	21128	PITHD1
GO:BP,	platelet-derived growth factor receptor signaling pathway	GO:0048008	1	0	58	110	1	21128	ITGB3
GO:BP,	bone remodeling	GO:0046849	1	0	90	110	1	21128	ITGB3
GO:BP,	negative regulation of nucleocytoplasmic transport	GO:0046823	1	0	23	110	1	21128	CD36
GO:BP,	regulation of nucleocytoplasmic transport	GO:0046822	1	0	110	110	1	21128	CD36
GO:BP,	regulation of Ras protein signal transduction	GO:0046578	1	0	201	110	1	21128	ARHGDIB
GO:BP,	regulation of organ growth	GO:0046620	1	0	88	110	1	21128	RBP4
GO:BP,	negative regulation of organ growth	GO:0046621	1	0	31	110	1	21128	RBP4
GO:BP,	gamma-delta T cell activation	GO:0046629	1	0	21	110	1	21128	PTPRC
GO:BP,	alpha-beta T cell activation	GO:0046631	1	0	169	110	1	21128	PTPRC
GO:BP,	alpha-beta T cell proliferation	GO:0046633	1	0	48	110	1	21128	PTPRC
GO:BP,	regulation of alpha-beta T cell activation	GO:0046634	1	0	113	110	1	21128	PTPRC
GO:BP,	positive regulation of alpha-beta T cell activation	GO:0046635	1	0	71	110	1	21128	PTPRC
GO:BP,	regulation of alpha-beta T cell proliferation	GO:0046640	1	0	45	110	1	21128	PTPRC
GO:BP,	positive regulation of alpha-beta T cell proliferation	GO:0046641	1	0	25	110	1	21128	PTPRC
GO:BP,	regulation of gamma-delta T cell activation	GO:0046643	1	0	10	110	1	21128	PTPRC
GO:BP,	positive regulation of gamma-delta T cell activation	GO:0046645	1	0	8	110	1	21128	PTPRC
GO:BP,	lymphocyte proliferation	GO:0046651	1	0	306	110	4	21128	CORO1A,PTPN6,PTPRC,IL6ST
GO:BP,	female sex differentiation	GO:0046660	1	0	124	110	2	21128	A2M,RBP4
GO:BP,	response to arsenic-containing substance	GO:0046685	1	0	32	110	1	21128	VCP
GO:BP,	decidualization	GO:0046697	1	0	25	110	1	21128	ASH1L
GO:BP,	heterocycle catabolic process	GO:0046700	1	0	460	110	3	21128	VCP,CDA,DPYD
GO:BP,	muscle cell cellular homeostasis	GO:0046716	1	0	26	110	1	21128	PLG
GO:BP,	viral entry into host cell	GO:0046718	1	0	152	110	1	21128	ITGB3
GO:BP,	non-lytic viral release	GO:0046753	1	0	16	110	1	21128	VPS4A
GO:BP,	viral budding	GO:0046755	1	0	28	110	2	21128	TSG101,VPS4A
GO:BP,	viral budding from plasma membrane	GO:0046761	1	0	15	110	1	21128	VPS4A
GO:BP,	protein autophosphorylation	GO:0046777	1	0	230	110	2	21128	PTPRC,PTK2
GO:BP,	macrophage chemotaxis	GO:0048246	1	0	42	110	1	21128	PTK2
GO:BP,	development of primary female sexual characteristics	GO:0046545	1	0	109	110	1	21128	A2M
GO:BP,	regulation of receptor-mediated endocytosis	GO:0048259	1	0	108	110	1	21128	ITGB3
GO:BP,	vesicle docking	GO:0048278	1	0	64	110	1	21128	STX7
GO:BP,	camera-type eye morphogenesis	GO:0048593	1	0	130	110	1	21128	RBP4
GO:BP,	embryonic morphogenesis	GO:0048598	1	0	618	110	6	21128	ITGB3,RBP4,MMP8,GRB2,ITGB2,TGFB1I1
GO:BP,	reproductive structure development	GO:0048608	1	0	307	110	3	21128	A2M,RBP4,ASH1L
GO:BP,	multicellular organismal reproductive process	GO:0048609	1	0	892	110	3	21128	A2M,PITHD1,ASH1L
GO:BP,	regulation of developmental growth	GO:0048638	1	0	323	110	2	21128	RBP4,ITSN2
GO:BP,	positive regulation of developmental growth	GO:0048639	1	0	163	110	1	21128	ITSN2
GO:BP,	negative regulation of developmental growth	GO:0048640	1	0	109	110	1	21128	RBP4
GO:BP,	anatomical structure formation involved in morphogenesis	GO:0048646	1	0	1168	110	12	21128	HRG,ITGB3,ITGA2B,RBP4,PTPN6,MMP8,UNC13D,PF4,GRB2,ITGB2,PTK2,CD36
GO:BP,	smooth muscle cell proliferation	GO:0048659	1	0	147	110	2	21128	SERPINF2,ITGB3
GO:BP,	regulation of smooth muscle cell proliferation	GO:0048660	1	0	142	110	2	21128	SERPINF2,ITGB3
GO:BP,	eye morphogenesis	GO:0048592	1	0	166	110	1	21128	RBP4
GO:BP,	positive regulation of smooth muscle cell proliferation	GO:0048661	1	0	85	110	2	21128	SERPINF2,ITGB3
GO:BP,	cell morphogenesis involved in neuron differentiation	GO:0048667	1	0	577	110	1	21128	PTK2
GO:BP,	generation of neurons	GO:0048699	1	0	1473	110	6	21128	MANF,ITGA6,S100A9,PTK2,ITSN2,ASAP1
GO:BP,	skeletal system morphogenesis	GO:0048705	1	0	232	110	1	21128	LTF
GO:BP,	embryonic skeletal system development	GO:0048706	1	0	129	110	1	21128	RBP4
GO:BP,	astrocyte differentiation	GO:0048708	1	0	81	110	3	21128	S100A8,S100A9,IL6ST
GO:BP,	regulation of astrocyte differentiation	GO:0048710	1	0	29	110	1	21128	IL6ST
GO:BP,	positive regulation of astrocyte differentiation	GO:0048711	1	0	13	110	1	21128	IL6ST
GO:BP,	tissue morphogenesis	GO:0048729	1	0	633	110	4	21128	ITGB3,CA2,GRB2,TGFB1I1
GO:BP,	system development	GO:0048731	1	0	3962	110	27	21128	A2M,PLG,LTF,HRG,SERPINF2,ITGB3,ITGA2B,PDLIM1,FGL1,GP5,GP1BA,S100A8,RBP4,PTPN6,CPB2,MANF,PECAM1,PF4,ITGA6,S100A9,ITGB2,PTPRC,PTK2,IL6ST,ITSN2,ASAP1,ASH1L
GO:BP,	gland development	GO:0048732	1	0	445	110	3	21128	FGL1,CPB2,ASH1L
GO:BP,	neuron development	GO:0048666	1	0	1130	110	6	21128	MANF,ITGA6,S100A9,PTK2,ITSN2,ASAP1
GO:BP,	developmental growth	GO:0048589	1	0	652	110	3	21128	PLG,RBP4,ITSN2
GO:BP,	developmental cell growth	GO:0048588	1	0	224	110	1	21128	ITSN2
GO:BP,	embryonic organ development	GO:0048568	1	0	461	110	4	21128	A2M,PLG,RBP4,GRB2
GO:BP,	organelle fusion	GO:0048284	1	0	154	110	3	21128	CORO1A,STX7,VPS4A
GO:BP,	organelle fission	GO:0048285	1	0	498	110	1	21128	VPS4A
GO:BP,	isotype switching to IgG isotypes	GO:0048291	1	0	15	110	1	21128	PTPRC
GO:BP,	regulation of isotype switching to IgG isotypes	GO:0048302	1	0	14	110	1	21128	PTPRC
GO:BP,	positive regulation of isotype switching to IgG isotypes	GO:0048304	1	0	10	110	1	21128	PTPRC
GO:BP,	mesoderm morphogenesis	GO:0048332	1	0	75	110	1	21128	ITGB3
GO:BP,	mesodermal cell differentiation	GO:0048333	1	0	33	110	1	21128	ITGB3
GO:BP,	cell development	GO:0048468	1	0	2728	110	17	21128	FGG,LTF,GP5,GP1BA,S100A8,PTPN6,MANF,PECAM1,PF4,ITGA6,S100A9,PTPRC,PTK2,PITHD1,IL6ST,ITSN2,ASAP1
GO:BP,	cell maturation	GO:0048469	1	0	190	110	1	21128	FGG
GO:BP,	synaptic vesicle endocytosis	GO:0048488	1	0	67	110	3	21128	CANX,RAB27B,ITSN2
GO:BP,	rhythmic process	GO:0048511	1	0	307	110	1	21128	A2M
GO:BP,	animal organ development	GO:0048513	1	0	3109	110	21	21128	A2M,PLG,LCP1,LTF,ITGB3,PDLIM1,FGL1,GP5,GP1BA,RBP4,PTPN6,CPB2,PECAM1,ITGA6,GRB2,PTPRC,PTK2,S100A4,TGFB1I1,TSG101,ASH1L
GO:BP,	blood vessel morphogenesis	GO:0048514	1	0	618	110	7	21128	HRG,SERPINF2,ITGB3,ITGA2B,PF4,ITGB2,PTK2
GO:BP,	spermatid differentiation	GO:0048515	1	0	201	110	1	21128	PITHD1
GO:BP,	negative regulation of biological process	GO:0048519	1	0	5927	110	43	21128	A2M,FGB,FGG,FGA,C4A,PLG,VCP,C4BPA,LTF,HRG,SERPINF2,ITGB3,ARHGDIB,FGL1,AZGP1,GP5,GP1BA,LIMS1,CORO1A,MASP1,RBP4,PTPN6,CPB2,MMP8,CDA,PF4,ITGA6,H1-4,PTPA,APOM,SKAP2,ITGB2,RGS10,PTPRC,PTK2,CD36,C4BPB,TGFB1I1,IL6ST,TSG101,ASAP1,VPS4A,ASH1L
GO:BP,	negative regulation of cellular process	GO:0048523	1	0	4755	110	35	21128	FGB,FGG,FGA,PLG,VCP,LTF,HRG,ITGB3,ARHGDIB,FGL1,AZGP1,GP5,GP1BA,LIMS1,CORO1A,RBP4,PTPN6,CPB2,CDA,PF4,ITGA6,H1-4,PTPA,APOM,SKAP2,ITGB2,RGS10,PTPRC,PTK2,CD36,TGFB1I1,IL6ST,TSG101,VPS4A,ASH1L
GO:BP,	positive regulation of viral process	GO:0048524	1	0	65	110	3	21128	STOM,TSG101,VPS4A
GO:BP,	negative regulation of viral process	GO:0048525	1	0	91	110	1	21128	LTF
GO:BP,	hematopoietic or lymphoid organ development	GO:0048534	1	0	97	110	1	21128	PTPRC
GO:BP,	bone marrow development	GO:0048539	1	0	8	110	1	21128	PTPRC
GO:BP,	response to steroid hormone	GO:0048545	1	0	342	110	4	21128	A2M,CPN1,WBP2,RWDD1
GO:BP,	embryonic organ morphogenesis	GO:0048562	1	0	302	110	1	21128	RBP4
GO:BP,	digestive tract development	GO:0048565	1	0	133	110	1	21128	IL6ST
GO:BP,	negative regulation of receptor-mediated endocytosis	GO:0048261	1	0	30	110	1	21128	ITGB3
GO:BP,	sebaceous gland development	GO:0048733	1	0	10	110	1	21128	ASH1L
GO:BP,	nicotinamide nucleotide metabolic process	GO:0046496	1	0	84	110	1	21128	VCP
GO:BP,	glycerolipid metabolic process	GO:0046486	1	0	400	110	1	21128	PIK3C3
GO:BP,	regulation of megakaryocyte differentiation	GO:0045652	1	0	37	110	2	21128	PF4,PITHD1
GO:BP,	negative regulation of megakaryocyte differentiation	GO:0045653	1	0	19	110	1	21128	PF4
GO:BP,	positive regulation of megakaryocyte differentiation	GO:0045654	1	0	11	110	1	21128	PITHD1
GO:BP,	regulation of osteoblast differentiation	GO:0045667	1	0	127	110	3	21128	LTF,PTK2,IL6ST
GO:BP,	positive regulation of osteoblast differentiation	GO:0045669	1	0	68	110	2	21128	LTF,IL6ST
GO:BP,	regulation of osteoclast differentiation	GO:0045670	1	0	69	110	1	21128	LTF
GO:BP,	negative regulation of osteoclast differentiation	GO:0045671	1	0	32	110	1	21128	LTF
GO:BP,	regulation of glial cell differentiation	GO:0045685	1	0	74	110	1	21128	IL6ST
GO:BP,	positive regulation of glial cell differentiation	GO:0045687	1	0	43	110	1	21128	IL6ST
GO:BP,	positive regulation of protein catabolic process	GO:0045732	1	0	212	110	3	21128	VCP,C4BPA,C4BPB
GO:BP,	positive regulation of macrophage differentiation	GO:0045651	1	0	16	110	1	21128	PF4
GO:BP,	positive regulation of G protein-coupled receptor signaling pathway	GO:0045745	1	0	27	110	1	21128	ITGB3
GO:BP,	regulation of angiogenesis	GO:0045765	1	0	287	110	4	21128	HRG,ITGB3,PF4,ITGB2
GO:BP,	positive regulation of angiogenesis	GO:0045766	1	0	165	110	2	21128	ITGB3,ITGB2
GO:BP,	positive regulation of ossification	GO:0045778	1	0	54	110	1	21128	LTF
GO:BP,	positive regulation of bone resorption	GO:0045780	1	0	19	110	1	21128	ITGB3
GO:BP,	negative regulation of cell cycle	GO:0045786	1	0	383	110	1	21128	VPS4A
GO:BP,	negative regulation of endocytosis	GO:0045806	1	0	49	110	1	21128	ITGB3
GO:BP,	positive regulation of endocytosis	GO:0045807	1	0	98	110	2	21128	CD36,TSG101
GO:BP,	transcription initiation-coupled chromatin remodeling	GO:0045815	1	0	18	110	1	21128	WBP2
GO:BP,	negative regulation of innate immune response	GO:0045824	1	0	74	110	1	21128	A2M
GO:BP,	positive regulation of isotype switching	GO:0045830	1	0	27	110	1	21128	PTPRC
GO:BP,	positive regulation of Notch signaling pathway	GO:0045747	1	0	46	110	1	21128	IL6ST
GO:BP,	regulation of macrophage differentiation	GO:0045649	1	0	23	110	1	21128	PF4
GO:BP,	positive regulation of myeloid cell differentiation	GO:0045639	1	0	100	110	2	21128	PF4,PITHD1
GO:BP,	negative regulation of myeloid cell differentiation	GO:0045638	1	0	92	110	2	21128	LTF,PF4
GO:BP,	cellular respiration	GO:0045333	1	0	256	110	1	21128	VCP
GO:BP,	MHC class II biosynthetic process	GO:0045342	1	0	20	110	1	21128	PF4
GO:BP,	regulation of MHC class II biosynthetic process	GO:0045346	1	0	19	110	1	21128	PF4
GO:BP,	negative regulation of MHC class II biosynthetic process	GO:0045347	1	0	6	110	1	21128	PF4
GO:BP,	fat cell differentiation	GO:0045444	1	0	237	110	1	21128	TGFB1I1
GO:BP,	myoblast differentiation	GO:0045445	1	0	112	110	1	21128	PLG
GO:BP,	endothelial cell differentiation	GO:0045446	1	0	112	110	1	21128	PECAM1
GO:BP,	bone resorption	GO:0045453	1	0	66	110	1	21128	ITGB3
GO:BP,	response to ethanol	GO:0045471	1	0	127	110	1	21128	S100A8
GO:BP,	mast cell activation	GO:0045576	1	0	69	110	3	21128	S100A12,PTPN6,UNC13D
GO:BP,	regulation of B cell differentiation	GO:0045577	1	0	33	110	1	21128	PTPN6
GO:BP,	regulation of T cell differentiation	GO:0045580	1	0	180	110	1	21128	PTPRC
GO:BP,	positive regulation of T cell differentiation	GO:0045582	1	0	117	110	1	21128	PTPRC
GO:BP,	regulation of gamma-delta T cell differentiation	GO:0045586	1	0	9	110	1	21128	PTPRC
GO:BP,	positive regulation of gamma-delta T cell differentiation	GO:0045588	1	0	7	110	1	21128	PTPRC
GO:BP,	regulation of cell differentiation	GO:0045595	1	0	1567	110	11	21128	LTF,SERPINF2,ITGB3,PTPN6,PF4,PTPRC,PTK2,CD36,PITHD1,TGFB1I1,IL6ST
GO:BP,	negative regulation of cell differentiation	GO:0045596	1	0	674	110	4	21128	LTF,ITGB3,PF4,TGFB1I1
GO:BP,	positive regulation of cell differentiation	GO:0045597	1	0	850	110	9	21128	LTF,SERPINF2,PF4,PTPRC,PTK2,CD36,PITHD1,TGFB1I1,IL6ST
GO:BP,	regulation of fat cell differentiation	GO:0045598	1	0	135	110	1	21128	TGFB1I1
GO:BP,	negative regulation of fat cell differentiation	GO:0045599	1	0	54	110	1	21128	TGFB1I1
GO:BP,	regulation of lymphocyte differentiation	GO:0045619	1	0	211	110	2	21128	PTPN6,PTPRC
GO:BP,	positive regulation of lymphocyte differentiation	GO:0045621	1	0	132	110	1	21128	PTPRC
GO:BP,	regulation of myeloid cell differentiation	GO:0045637	1	0	210	110	3	21128	LTF,PF4,PITHD1
GO:BP,	positive regulation of lipid metabolic process	GO:0045834	1	0	151	110	1	21128	PTK2
GO:BP,	phosphatidylinositol metabolic process	GO:0046488	1	0	161	110	1	21128	PIK3C3
GO:BP,	positive regulation of membrane potential	GO:0045838	1	0	17	110	1	21128	VCP
GO:BP,	positive regulation of protein kinase activity	GO:0045860	1	0	417	110	5	21128	LTF,ITGB3,S100A12,PTPRC,PTK2
GO:BP,	dUMP catabolic process	GO:0046079	1	0	6	110	1	21128	DPYD
GO:BP,	cytidine metabolic process	GO:0046087	1	0	12	110	1	21128	CDA
GO:BP,	thymidine metabolic process	GO:0046104	1	0	5	110	1	21128	DPYD
GO:BP,	nucleobase catabolic process	GO:0046113	1	0	5	110	1	21128	DPYD
GO:BP,	deoxyribonucleoside catabolic process	GO:0046121	1	0	6	110	1	21128	DPYD
GO:BP,	pyrimidine deoxyribonucleoside metabolic process	GO:0046125	1	0	5	110	1	21128	DPYD
GO:BP,	pyrimidine deoxyribonucleoside catabolic process	GO:0046127	1	0	1	110	1	21128	DPYD
GO:BP,	pyrimidine ribonucleoside metabolic process	GO:0046131	1	0	14	110	1	21128	CDA
GO:BP,	pyrimidine ribonucleoside catabolic process	GO:0046133	1	0	14	110	1	21128	CDA
GO:BP,	pyrimidine nucleoside catabolic process	GO:0046135	1	0	16	110	2	21128	CDA,DPYD
GO:BP,	dUMP metabolic process	GO:0046078	1	0	9	110	1	21128	DPYD
GO:BP,	nitric oxide metabolic process	GO:0046209	1	0	78	110	4	21128	HBB,MMP8,ITGB2,CD36
GO:BP,	regulation of JNK cascade	GO:0046328	1	0	143	110	2	21128	SERPINF2,MMP8
GO:BP,	positive regulation of JNK cascade	GO:0046330	1	0	97	110	2	21128	SERPINF2,MMP8
GO:BP,	monosaccharide biosynthetic process	GO:0046364	1	0	91	110	1	21128	RBP4
GO:BP,	deoxyribose phosphate catabolic process	GO:0046386	1	0	28	110	1	21128	DPYD
GO:BP,	ribose phosphate biosynthetic process	GO:0046390	1	0	249	110	2	21128	VCP,CDA
GO:BP,	carboxylic acid biosynthetic process	GO:0046394	1	0	329	110	1	21128	DPYD
GO:BP,	regulation of receptor signaling pathway via JAK-STAT	GO:0046425	1	0	102	110	1	21128	PTPRC
GO:BP,	organophosphate catabolic process	GO:0046434	1	0	164	110	3	21128	VCP,PLBD1,DPYD
GO:BP,	glycerophospholipid biosynthetic process	GO:0046474	1	0	215	110	1	21128	PIK3C3
GO:BP,	heterocycle metabolic process	GO:0046483	1	0	8296	110	25	21128	VCP,LTF,SERPINF2,PDLIM1,S100A12,AZGP1,LIMS1,ENDOD1,S100A8,CDA,PF4,ITGA6,H1-4,S100A9,ITGB2,WBP2,PTPRC,CD36,PITHD1,TGFB1I1,TSG101,RWDD1,DPYD,ZNF578,ASH1L
GO:BP,	phosphocreatine biosynthetic process	GO:0046314	1	0	5	110	1	21128	CKMT2
GO:BP,	dCMP metabolic process	GO:0046063	1	0	6	110	1	21128	DPYD
GO:BP,	UMP catabolic process	GO:0046050	1	0	5	110	1	21128	DPYD
GO:BP,	UMP metabolic process	GO:0046049	1	0	19	110	2	21128	CDA,DPYD
GO:BP,	negative regulation of proteolysis	GO:0045861	1	0	341	110	6	21128	A2M,C4A,LTF,HRG,SERPINF2,CPB2
GO:BP,	positive regulation of proteolysis	GO:0045862	1	0	369	110	4	21128	VCP,S100A8,S100A9,PTK2
GO:BP,	negative regulation of smoothened signaling pathway	GO:0045879	1	0	34	110	1	21128	VCP
GO:BP,	negative regulation of DNA-templated transcription	GO:0045892	1	0	1311	110	4	21128	LIMS1,H1-4,CD36,TSG101
GO:BP,	positive regulation of DNA-templated transcription	GO:0045893	1	0	1703	110	9	21128	SERPINF2,PDLIM1,PF4,ITGA6,WBP2,PITHD1,TGFB1I1,TSG101,ASH1L
GO:BP,	positive regulation of vasoconstriction	GO:0045907	1	0	31	110	3	21128	FGB,FGG,FGA
GO:BP,	negative regulation of DNA recombination	GO:0045910	1	0	44	110	1	21128	H1-4
GO:BP,	positive regulation of DNA recombination	GO:0045911	1	0	71	110	1	21128	PTPRC
GO:BP,	negative regulation of catecholamine metabolic process	GO:0045914	1	0	2	110	1	21128	ITGB2
GO:BP,	negative regulation of growth	GO:0045926	1	0	248	110	3	21128	HRG,RBP4,CDA
GO:BP,	positive regulation of growth	GO:0045927	1	0	261	110	3	21128	S100A8,S100A9,ITSN2
GO:BP,	negative regulation of mitotic cell cycle	GO:0045930	1	0	228	110	1	21128	VPS4A
GO:BP,	negative regulation of nucleobase-containing compound metabolic process	GO:0045934	1	0	1565	110	5	21128	LIMS1,CDA,H1-4,CD36,TSG101
GO:BP,	positive regulation of nucleobase-containing compound metabolic process	GO:0045935	1	0	2051	110	11	21128	VCP,SERPINF2,PDLIM1,PF4,ITGA6,WBP2,PTPRC,PITHD1,TGFB1I1,TSG101,ASH1L
GO:BP,	negative regulation of phosphate metabolic process	GO:0045936	1	0	419	110	5	21128	PTPN6,CDA,PTPA,PTPRC,TSG101
GO:BP,	positive regulation of phosphate metabolic process	GO:0045937	1	0	907	110	11	21128	VCP,LTF,ITGB3,S100A12,PECAM1,ITGA6,PTPA,PTPRC,PTK2,CD36,IL6ST
GO:BP,	positive regulation of transcription by RNA polymerase II	GO:0045944	1	0	1242	110	5	21128	SERPINF2,PF4,ITGA6,WBP2,ASH1L
GO:BP,	negative regulation of complement activation, classical pathway	GO:0045959	1	0	9	110	2	21128	C4BPA,C4BPB
GO:BP,	negative regulation of dopamine metabolic process	GO:0045963	1	0	2	110	1	21128	ITGB2
GO:BP,	negative regulation of nucleotide metabolic process	GO:0045980	1	0	24	110	1	21128	CDA
GO:BP,	positive regulation of nucleotide metabolic process	GO:0045981	1	0	48	110	1	21128	VCP
GO:BP,	ATP metabolic process	GO:0046034	1	0	224	110	1	21128	VCP
GO:BP,	CMP metabolic process	GO:0046035	1	0	8	110	1	21128	DPYD
GO:BP,	regulation of protein kinase activity	GO:0045859	1	0	661	110	7	21128	LTF,ITGB3,S100A12,PTPN6,PTPRC,PTK2,TSG101
GO:BP,	appendage development	GO:0048736	1	0	182	110	1	21128	ITGA6
GO:BP,	cardiac muscle tissue development	GO:0048738	1	0	224	110	1	21128	RBP4
GO:BP,	mesenchymal cell differentiation	GO:0048762	1	0	241	110	3	21128	PTK2,S100A4,TGFB1I1
GO:BP,	regulation of neurotransmitter transport	GO:0051588	1	0	107	110	1	21128	ITGB3
GO:BP,	response to calcium ion	GO:0051592	1	0	149	110	3	21128	FGB,FGG,FGA
GO:BP,	proteolysis involved in protein catabolic process	GO:0051603	1	0	799	110	7	21128	VCP,CANX,PTK2,PITHD1,TGFB1I1,TSG101,VPS4A
GO:BP,	detection of stimulus	GO:0051606	1	0	647	110	2	21128	AZGP1,PTK2
GO:BP,	defense response to virus	GO:0051607	1	0	304	110	2	21128	UNC13D,PTPRC
GO:BP,	serotonin uptake	GO:0051610	1	0	11	110	1	21128	ITGB3
GO:BP,	regulation of serotonin uptake	GO:0051611	1	0	4	110	1	21128	ITGB3
GO:BP,	actin filament network formation	GO:0051639	1	0	11	110	1	21128	LCP1
GO:BP,	organelle localization	GO:0051640	1	0	577	110	4	21128	UNC13D,STX7,TSG101,VPS4A
GO:BP,	cellular localization	GO:0051641	1	0	3588	110	32	21128	FGB,FGG,FGA,LCP1,VCP,ITGB3,LCN2,AZGP1,GP5,GP1BA,LIMS1,CORO1A,S100A8,RBP4,PTPN6,UNC13D,PECAM1,CANX,S100A9,ITGB2,STX7,WBP2,RAB27B,PTPRC,STOM,CD36,RP2,RUFY1,ITSN2,TSG101,PIK3C3,VPS4A
GO:BP,	regulation of neurotransmitter uptake	GO:0051580	1	0	18	110	1	21128	ITGB3
GO:BP,	vesicle localization	GO:0051648	1	0	211	110	2	21128	TSG101,VPS4A
GO:BP,	establishment of vesicle localization	GO:0051650	1	0	194	110	2	21128	TSG101,VPS4A
GO:BP,	establishment of organelle localization	GO:0051656	1	0	443	110	3	21128	UNC13D,TSG101,VPS4A
GO:BP,	membrane raft localization	GO:0051665	1	0	8	110	1	21128	PTPRC
GO:BP,	localization within membrane	GO:0051668	1	0	901	110	5	21128	ITGB2,STX7,PTPRC,STOM,VPS4A
GO:BP,	disruption of membrane integrity in another organism	GO:0051673	1	0	13	110	1	21128	LTF
GO:BP,	biological process involved in interaction with host	GO:0051701	1	0	219	110	4	21128	LTF,ITGB3,TSG101,VPS4A
GO:BP,	biological process involved in intraspecies interaction between organisms	GO:0051703	1	0	56	110	1	21128	LTF
GO:BP,	regulation of cell cycle	GO:0051726	1	0	1124	110	5	21128	PTPN6,PTPRC,TSG101,PIK3C3,VPS4A
GO:BP,	actin crosslink formation	GO:0051764	1	0	14	110	1	21128	LCP1
GO:BP,	positive regulation of cell division	GO:0051781	1	0	93	110	1	21128	PPBP
GO:BP,	establishment of localization in cell	GO:0051649	1	0	2340	110	15	21128	LCP1,VCP,ITGB3,CORO1A,UNC13D,CANX,ITGB2,STX7,RAB27B,STOM,CD36,ITSN2,TSG101,PIK3C3,VPS4A
GO:BP,	histone H3-K4 methylation	GO:0051568	1	0	73	110	2	21128	H1-4,ASH1L
GO:BP,	RNA phosphodiester bond hydrolysis	GO:0090501	1	0	161	110	1	21128	AZGP1
GO:BP,	positive regulation of cytoskeleton organization	GO:0051495	1	0	194	110	2	21128	SERPINF2,GRB2
GO:BP,	negative regulation of lymphocyte activation	GO:0051250	1	0	162	110	2	21128	FGL1,PTPN6
GO:BP,	regulation of RNA metabolic process	GO:0051252	1	0	3783	110	19	21128	LTF,SERPINF2,PDLIM1,S100A12,LIMS1,S100A8,PF4,ITGA6,H1-4,S100A9,ITGB2,WBP2,CD36,PITHD1,TGFB1I1,TSG101,RWDD1,ZNF578,ASH1L
GO:BP,	negative regulation of RNA metabolic process	GO:0051253	1	0	1438	110	4	21128	LIMS1,H1-4,CD36,TSG101
GO:BP,	positive regulation of RNA metabolic process	GO:0051254	1	0	1843	110	9	21128	SERPINF2,PDLIM1,PF4,ITGA6,WBP2,PITHD1,TGFB1I1,TSG101,ASH1L
GO:BP,	protein polymerization	GO:0051258	1	0	284	110	5	21128	FGB,FGG,FGA,CORO1A,GRB2
GO:BP,	protein depolymerization	GO:0051261	1	0	123	110	1	21128	VPS4A
GO:BP,	chromosome organization	GO:0051276	1	0	635	110	2	21128	H1-4,VPS4A
GO:BP,	regulation of release of sequestered calcium ion into cytosol	GO:0051279	1	0	83	110	3	21128	ITGB3,CORO1A,PTPN6
GO:BP,	cell division	GO:0051301	1	0	660	110	4	21128	PPBP,TSG101,PIK3C3,VPS4A
GO:BP,	regulation of cell division	GO:0051302	1	0	189	110	3	21128	PPBP,PIK3C3,VPS4A
GO:BP,	establishment of chromosome localization	GO:0051303	1	0	85	110	1	21128	VPS4A
GO:BP,	metaphase plate congression	GO:0051310	1	0	73	110	1	21128	VPS4A
GO:BP,	regulation of transferase activity	GO:0051338	1	0	908	110	7	21128	LTF,ITGB3,S100A12,PTPN6,PTPRC,PTK2,TSG101
GO:BP,	negative regulation of hydrolase activity	GO:0051346	1	0	356	110	6	21128	A2M,C4A,LTF,HRG,SERPINF2,PTPA
GO:BP,	positive regulation of transferase activity	GO:0051347	1	0	584	110	5	21128	LTF,ITGB3,S100A12,PTPRC,PTK2
GO:BP,	negative regulation of transferase activity	GO:0051348	1	0	271	110	3	21128	PTPN6,PTPRC,TSG101
GO:BP,	response to glucocorticoid	GO:0051384	1	0	145	110	2	21128	A2M,CPN1
GO:BP,	neuron apoptotic process	GO:0051402	1	0	254	110	2	21128	CORO1A,IL6ST
GO:BP,	stress-activated MAPK cascade	GO:0051403	1	0	239	110	2	21128	SERPINF2,MMP8
GO:BP,	intracellular pH reduction	GO:0051452	1	0	53	110	1	21128	CA2
GO:BP,	regulation of intracellular pH	GO:0051453	1	0	85	110	1	21128	CA2
GO:BP,	regulation of stress fiber assembly	GO:0051492	1	0	89	110	1	21128	SERPINF2
GO:BP,	negative regulation of cytoskeleton organization	GO:0051494	1	0	165	110	1	21128	CORO1A
GO:BP,	negative regulation of cell division	GO:0051782	1	0	17	110	1	21128	VPS4A
GO:BP,	negative regulation of protein metabolic process	GO:0051248	1	0	1031	110	11	21128	A2M,C4A,LTF,HRG,SERPINF2,ITGB3,PTPN6,CPB2,PTPA,PTPRC,TSG101
GO:BP,	response to misfolded protein	GO:0051788	1	0	25	110	1	21128	VCP
GO:BP,	regulation of mitochondrial membrane potential	GO:0051881	1	0	71	110	1	21128	VCP
GO:BP,	lipoprotein particle mediated signaling	GO:0055095	1	0	3	110	1	21128	CD36
GO:BP,	low-density lipoprotein particle mediated signaling	GO:0055096	1	0	3	110	1	21128	CD36
GO:BP,	digestive system development	GO:0055123	1	0	145	110	1	21128	IL6ST
GO:BP,	cardiac muscle cell proliferation	GO:0060038	1	0	50	110	1	21128	RBP4
GO:BP,	retina development in camera-type eye	GO:0060041	1	0	161	110	1	21128	RBP4
GO:BP,	retina morphogenesis in camera-type eye	GO:0060042	1	0	64	110	1	21128	RBP4
GO:BP,	regulation of cardiac muscle cell proliferation	GO:0060043	1	0	38	110	1	21128	RBP4
GO:BP,	negative regulation of cardiac muscle cell proliferation	GO:0060044	1	0	12	110	1	21128	RBP4
GO:BP,	angiogenesis involved in wound healing	GO:0060055	1	0	28	110	1	21128	ITGB3
GO:BP,	embryonic retina morphogenesis in camera-type eye	GO:0060059	1	0	6	110	1	21128	RBP4
GO:BP,	response to lipoprotein particle	GO:0055094	1	0	29	110	2	21128	ITGB2,CD36
GO:BP,	uterus development	GO:0060065	1	0	24	110	2	21128	RBP4,ASH1L
GO:BP,	canonical Wnt signaling pathway	GO:0060070	1	0	299	110	1	21128	VCP
GO:BP,	regulation of phagocytosis, engulfment	GO:0060099	1	0	16	110	1	21128	CD36
GO:BP,	positive regulation of phagocytosis, engulfment	GO:0060100	1	0	14	110	1	21128	CD36
GO:BP,	maternal process involved in female pregnancy	GO:0060135	1	0	60	110	1	21128	ASH1L
GO:BP,	urinary bladder development	GO:0060157	1	0	4	110	1	21128	RBP4
GO:BP,	limb development	GO:0060173	1	0	182	110	1	21128	ITGA6
GO:BP,	regulation of macromolecule metabolic process	GO:0060255	1	0	6851	110	35	21128	A2M,C4A,VCP,C4BPA,LTF,HRG,SERPINF2,ITGB3,PDLIM1,S100A12,LIMS1,S100A8,RBP4,PTPN6,CPB2,MMP8,PECAM1,PF4,ITGA6,H1-4,PTPA,S100A9,ITGB2,WBP2,PTPRC,PTK2,CD36,C4BPB,PITHD1,TGFB1I1,IL6ST,TSG101,RWDD1,ZNF578,ASH1L
GO:BP,	cilium assembly	GO:0060271	1	0	370	110	2	21128	RP2,ASAP1
GO:BP,	regulation of cell development	GO:0060284	1	0	830	110	6	21128	LTF,PTPN6,PF4,PTPRC,PITHD1,IL6ST
GO:BP,	cilium-dependent cell motility	GO:0060285	1	0	161	110	1	21128	ASH1L
GO:BP,	vagina development	GO:0060068	1	0	10	110	1	21128	RBP4
GO:BP,	sterol homeostasis	GO:0055092	1	0	87	110	1	21128	APOM
GO:BP,	lipid homeostasis	GO:0055088	1	0	159	110	1	21128	APOM
GO:BP,	nucleobase-containing small molecule metabolic process	GO:0055086	1	0	700	110	3	21128	VCP,CDA,DPYD
GO:BP,	regulation of focal adhesion assembly	GO:0051893	1	0	64	110	3	21128	HRG,LIMS1,PTK2
GO:BP,	positive regulation of focal adhesion assembly	GO:0051894	1	0	26	110	2	21128	HRG,LIMS1
GO:BP,	regulation of protein kinase B signaling	GO:0051896	1	0	168	110	1	21128	PTK2
GO:BP,	positive regulation of protein kinase B signaling	GO:0051897	1	0	114	110	1	21128	PTK2
GO:BP,	positive regulation of fibrinolysis	GO:0051919	1	0	4	110	1	21128	PLG
GO:BP,	regulation of calcium ion transport	GO:0051924	1	0	264	110	3	21128	ITGB3,CORO1A,PTPN6
GO:BP,	synaptic transmission, GABAergic	GO:0051932	1	0	58	110	1	21128	CA2
GO:BP,	regulation of nervous system development	GO:0051960	1	0	457	110	1	21128	IL6ST
GO:BP,	positive regulation of nervous system development	GO:0051962	1	0	283	110	1	21128	IL6ST
GO:BP,	modification by symbiont of host cell membrane	GO:0052025	1	0	13	110	1	21128	LTF
GO:BP,	modification by symbiont of host cellular component	GO:0052043	1	0	13	110	1	21128	LTF
GO:BP,	modification by symbiont of host structure	GO:0052111	1	0	13	110	1	21128	LTF
GO:BP,	regulation of peptidase activity	GO:0052547	1	0	444	110	8	21128	A2M,C4A,VCP,LTF,HRG,SERPINF2,S100A8,S100A9
GO:BP,	regulation of endopeptidase activity	GO:0052548	1	0	415	110	8	21128	A2M,C4A,VCP,LTF,HRG,SERPINF2,S100A8,S100A9
GO:BP,	cardiac muscle tissue growth	GO:0055017	1	0	75	110	1	21128	RBP4
GO:BP,	regulation of cardiac muscle tissue growth	GO:0055021	1	0	54	110	1	21128	RBP4
GO:BP,	negative regulation of cardiac muscle tissue growth	GO:0055022	1	0	23	110	1	21128	RBP4
GO:BP,	zinc ion homeostasis	GO:0055069	1	0	41	110	2	21128	S100A8,S100A9
GO:BP,	iron ion homeostasis	GO:0055072	1	0	88	110	2	21128	LTF,LCN2
GO:BP,	calcium ion homeostasis	GO:0055074	1	0	315	110	6	21128	ITGB3,GP5,GP1BA,CORO1A,PTPN6,PTPRC
GO:BP,	transition metal ion homeostasis	GO:0055076	1	0	142	110	4	21128	LTF,LCN2,S100A8,S100A9
GO:BP,	cellular chemical homeostasis	GO:0055082	1	0	689	110	11	21128	ITGB3,CA2,LCN2,GP5,GP1BA,CORO1A,S100A8,PTPN6,CPB2,S100A9,PTPRC
GO:BP,	transmembrane transport	GO:0055085	1	0	1555	110	11	21128	ITGB3,CA2,AZGP1,GP5,GP1BA,PPBP,CORO1A,PTPN6,PTPRC,STOM,CD36
GO:BP,	modulation by host of symbiont process	GO:0051851	1	0	81	110	3	21128	LTF,STOM,PIK3C3
GO:BP,	positive regulation of protein metabolic process	GO:0051247	1	0	1499	110	15	21128	VCP,C4BPA,LTF,ITGB3,S100A12,S100A8,PECAM1,PTPA,S100A9,WBP2,PTPRC,PTK2,CD36,C4BPB,IL6ST
GO:BP,	regulation of protein metabolic process	GO:0051246	1	0	2560	110	24	21128	A2M,C4A,VCP,C4BPA,LTF,HRG,SERPINF2,ITGB3,S100A12,S100A8,PTPN6,CPB2,PECAM1,PTPA,S100A9,ITGB2,WBP2,PTPRC,PTK2,CD36,C4BPB,PITHD1,IL6ST,TSG101
GO:BP,	spindle disassembly	GO:0051230	1	0	2	110	1	21128	VCP
GO:BP,	regulation of inflammatory response	GO:0050727	1	0	371	110	7	21128	S100A12,S100A8,MMP8,S100A9,PTPRC,IL6ST,ASH1L
GO:BP,	negative regulation of inflammatory response	GO:0050728	1	0	148	110	2	21128	PTPRC,ASH1L
GO:BP,	positive regulation of inflammatory response	GO:0050729	1	0	145	110	5	21128	S100A12,S100A8,MMP8,S100A9,IL6ST
GO:BP,	positive regulation of peptidyl-tyrosine phosphorylation	GO:0050731	1	0	191	110	5	21128	ITGB3,PECAM1,PTPRC,CD36,IL6ST
GO:BP,	negative regulation of peptidyl-tyrosine phosphorylation	GO:0050732	1	0	53	110	3	21128	PTPN6,PTPRC,TSG101
GO:BP,	regulation of lipoprotein metabolic process	GO:0050746	1	0	18	110	1	21128	ITGB3
GO:BP,	negative regulation of lipoprotein metabolic process	GO:0050748	1	0	5	110	1	21128	ITGB3
GO:BP,	regulation of phagocytosis	GO:0050764	1	0	102	110	4	21128	C4A,PTPRC,CD36,COLEC11
GO:BP,	positive regulation of phagocytosis	GO:0050766	1	0	73	110	4	21128	C4A,PTPRC,CD36,COLEC11
GO:BP,	regulation of neurogenesis	GO:0050767	1	0	375	110	1	21128	IL6ST
GO:BP,	positive regulation of protein secretion	GO:0050714	1	0	131	110	4	21128	FGB,FGG,FGA,RBP4
GO:BP,	positive regulation of neurogenesis	GO:0050769	1	0	233	110	1	21128	IL6ST
GO:BP,	regulation of developmental process	GO:0050793	1	0	2474	110	17	21128	LTF,HRG,SERPINF2,ITGB3,CORO1A,RBP4,PTPN6,PF4,ITGB2,PTPRC,PTK2,CD36,PITHD1,TGFB1I1,IL6ST,ITSN2,ASAP1
GO:BP,	regulation of insulin secretion	GO:0050796	1	0	155	110	1	21128	RBP4
GO:BP,	regulation of synapse structure or activity	GO:0050803	1	0	220	110	1	21128	VCP
GO:BP,	modulation of chemical synaptic transmission	GO:0050804	1	0	455	110	1	21128	CA2
GO:BP,	positive regulation of synaptic transmission	GO:0050806	1	0	173	110	1	21128	CA2
GO:BP,	regulation of synapse organization	GO:0050807	1	0	214	110	1	21128	VCP
GO:BP,	synapse organization	GO:0050808	1	0	438	110	1	21128	VCP
GO:BP,	defense response to Gram-negative bacterium	GO:0050829	1	0	91	110	4	21128	IGHM,LTF,SELP,LYZ
GO:BP,	defense response to Gram-positive bacterium	GO:0050830	1	0	120	110	2	21128	LYZ,CD36
GO:BP,	progesterone receptor signaling pathway	GO:0050847	1	0	9	110	1	21128	WBP2
GO:BP,	regulation of viral process	GO:0050792	1	0	162	110	4	21128	LTF,STOM,TSG101,VPS4A
GO:BP,	regulation of protein secretion	GO:0050708	1	0	251	110	5	21128	FGB,FGG,FGA,RBP4,PIK3C3
GO:BP,	negative regulation of epithelial cell proliferation	GO:0050680	1	0	140	110	1	21128	CPB2
GO:BP,	positive regulation of epithelial cell proliferation	GO:0050679	1	0	211	110	1	21128	ITGB3
GO:BP,	tissue remodeling	GO:0048771	1	0	168	110	3	21128	PLG,HRG,ITGB3
GO:BP,	animal organ maturation	GO:0048799	1	0	33	110	1	21128	LTF
GO:BP,	genitalia development	GO:0048806	1	0	46	110	1	21128	RBP4
GO:BP,	female genitalia morphogenesis	GO:0048807	1	0	3	110	1	21128	RBP4
GO:BP,	neuron projection morphogenesis	GO:0048812	1	0	635	110	2	21128	PTK2,ITSN2
GO:BP,	anatomical structure development	GO:0048856	1	0	5861	110	41	21128	A2M,FGG,PLG,LCP1,LTF,HRG,SERPINF2,ITGB3,ITGA2B,ARHGDIB,PDLIM1,CA2,FGL1,GP5,GP1BA,CORO1A,S100A8,RBP4,PTPN6,CPB2,MANF,MMP8,UNC13D,PECAM1,PF4,ITGA6,GRB2,S100A9,ITGB2,PTPRC,PTK2,S100A4,CD36,PITHD1,TGFB1I1,IL6ST,ITSN2,TSG101,ASAP1,VPS4A,ASH1L
GO:BP,	cell projection morphogenesis	GO:0048858	1	0	656	110	2	21128	PTK2,ITSN2
GO:BP,	leukemia inhibitory factor signaling pathway	GO:0048861	1	0	9	110	1	21128	IL6ST
GO:BP,	stem cell differentiation	GO:0048863	1	0	248	110	2	21128	A2M,PTPRC
GO:BP,	stem cell development	GO:0048864	1	0	89	110	1	21128	PTPRC
GO:BP,	cellular developmental process	GO:0048869	1	0	4312	110	28	21128	A2M,FGG,PLG,LTF,SERPINF2,ITGB3,GP5,GP1BA,S100A8,PTPN6,MANF,MMP8,PECAM1,PF4,ITGA6,GRB2,S100A9,ITGB2,PTPRC,PTK2,S100A4,CD36,PITHD1,TGFB1I1,IL6ST,ITSN2,TSG101,ASAP1
GO:BP,	multicellular organismal homeostasis	GO:0048871	1	0	754	110	9	21128	LTF,ITGB3,LCN2,AZGP1,CORO1A,RBP4,PECAM1,LYZ,CD36
GO:BP,	homeostasis of number of cells	GO:0048872	1	0	300	110	1	21128	CORO1A
GO:BP,	homeostasis of number of cells within a tissue	GO:0048873	1	0	31	110	1	21128	CORO1A
GO:BP,	chemical homeostasis	GO:0048878	1	0	1014	110	14	21128	LTF,ITGB3,CA2,LCN2,GP5,GP1BA,CORO1A,S100A8,RBP4,PTPN6,CPB2,APOM,S100A9,PTPRC
GO:BP,	sensory system development	GO:0048880	1	0	408	110	1	21128	RBP4
GO:BP,	chromosome localization	GO:0050000	1	0	92	110	1	21128	VPS4A
GO:BP,	chondroitin sulfate proteoglycan metabolic process	GO:0050654	1	0	38	110	1	21128	GUSB
GO:BP,	regulation of lymphocyte proliferation	GO:0050670	1	0	239	110	4	21128	CORO1A,PTPN6,PTPRC,IL6ST
GO:BP,	positive regulation of lymphocyte proliferation	GO:0050671	1	0	145	110	3	21128	CORO1A,PTPRC,IL6ST
GO:BP,	negative regulation of lymphocyte proliferation	GO:0050672	1	0	88	110	1	21128	PTPN6
GO:BP,	epithelial cell proliferation	GO:0050673	1	0	443	110	3	21128	ITGB3,FGL1,CPB2
GO:BP,	regulation of epithelial cell proliferation	GO:0050678	1	0	373	110	2	21128	ITGB3,CPB2
GO:BP,	T cell receptor signaling pathway	GO:0050852	1	0	132	110	2	21128	PTPN6,PTPRC
GO:BP,	regulation of antigen receptor-mediated signaling pathway	GO:0050854	1	0	64	110	2	21128	PTPN6,PTPRC
GO:BP,	regulation of T cell receptor signaling pathway	GO:0050856	1	0	45	110	1	21128	PTPN6
GO:BP,	positive regulation of antigen receptor-mediated signaling pathway	GO:0050857	1	0	24	110	1	21128	PTPRC
GO:BP,	positive regulation of DNA metabolic process	GO:0051054	1	0	299	110	1	21128	PTPRC
GO:BP,	regulation of small GTPase mediated signal transduction	GO:0051056	1	0	314	110	1	21128	ARHGDIB
GO:BP,	regulation of DNA-binding transcription factor activity	GO:0051090	1	0	434	110	7	21128	LTF,S100A12,S100A8,S100A9,ITGB2,CD36,RWDD1
GO:BP,	negative regulation of developmental process	GO:0051093	1	0	919	110	7	21128	LTF,HRG,ITGB3,RBP4,PF4,TGFB1I1,ASAP1
GO:BP,	positive regulation of developmental process	GO:0051094	1	0	1311	110	12	21128	LTF,SERPINF2,ITGB3,PF4,ITGB2,PTPRC,PTK2,CD36,PITHD1,TGFB1I1,IL6ST,ITSN2
GO:BP,	regulation of binding	GO:0051098	1	0	372	110	3	21128	CFHR1,MMP8,CFHR2
GO:BP,	positive regulation of binding	GO:0051099	1	0	179	110	1	21128	MMP8
GO:BP,	negative regulation of binding	GO:0051100	1	0	162	110	2	21128	CFHR1,CFHR2
GO:BP,	regulation of DNA binding	GO:0051101	1	0	121	110	1	21128	MMP8
GO:BP,	regulation of actin nucleation	GO:0051125	1	0	41	110	1	21128	CORO1A
GO:BP,	negative regulation of actin nucleation	GO:0051126	1	0	10	110	1	21128	CORO1A
GO:BP,	regulation of cellular component organization	GO:0051128	1	0	2365	110	23	21128	LCP1,VCP,HRG,SERPINF2,ITGB3,SELP,ARHGDIB,LIMS1,CORO1A,S100A8,CPB2,CDA,ITGA6,GRB2,IQGAP2,APOM,S100A9,PTK2,CD36,RUFY1,ITSN2,TSG101,ASAP1
GO:BP,	negative regulation of cellular component organization	GO:0051129	1	0	702	110	4	21128	HRG,ITGB3,CORO1A,APOM
GO:BP,	positive regulation of cellular component organization	GO:0051130	1	0	1056	110	12	21128	LCP1,VCP,HRG,SERPINF2,LIMS1,CPB2,ITGA6,GRB2,S100A9,CD36,TSG101,ASAP1
GO:BP,	nuclear transport	GO:0051169	1	0	330	110	1	21128	CD36
GO:BP,	import into nucleus	GO:0051170	1	0	170	110	1	21128	CD36
GO:BP,	regulation of nitrogen compound metabolic process	GO:0051171	1	0	5724	110	36	21128	A2M,C4A,VCP,C4BPA,HBB,LTF,HRG,SERPINF2,ITGB3,PDLIM1,S100A12,LIMS1,S100A8,PTPN6,CPB2,MMP8,CDA,PECAM1,PF4,ITGA6,H1-4,PTPA,S100A9,ITGB2,WBP2,PTPRC,PTK2,CD36,C4BPB,PITHD1,TGFB1I1,IL6ST,TSG101,RWDD1,ZNF578,ASH1L
GO:BP,	negative regulation of nitrogen compound metabolic process	GO:0051172	1	0	2401	110	16	21128	A2M,C4A,LTF,HRG,SERPINF2,ITGB3,LIMS1,PTPN6,CPB2,CDA,H1-4,PTPA,ITGB2,PTPRC,CD36,TSG101
GO:BP,	positive regulation of nitrogen compound metabolic process	GO:0051173	1	0	3154	110	26	21128	VCP,C4BPA,HBB,LTF,SERPINF2,ITGB3,PDLIM1,S100A12,S100A8,MMP8,PECAM1,PF4,ITGA6,PTPA,S100A9,ITGB2,WBP2,PTPRC,PTK2,CD36,C4BPB,PITHD1,TGFB1I1,IL6ST,TSG101,ASH1L
GO:BP,	regulation of phosphorus metabolic process	GO:0051174	1	0	1401	110	17	21128	VCP,LTF,HRG,ITGB3,S100A12,PTPN6,CDA,PECAM1,ITGA6,PTPA,ITGB2,PTPRC,PTK2,CD36,IL6ST,PPP1R14A,TSG101
GO:BP,	positive regulation of protein transport	GO:0051222	1	0	299	110	7	21128	FGB,FGG,FGA,RBP4,ITGB2,STOM,TSG101
GO:BP,	negative regulation of protein transport	GO:0051224	1	0	118	110	1	21128	CD36
GO:BP,	mitotic spindle disassembly	GO:0051228	1	0	2	110	1	21128	VCP
GO:BP,	negative regulation of DNA metabolic process	GO:0051053	1	0	147	110	1	21128	H1-4
GO:BP,	regulation of blood vessel remodeling	GO:0060312	1	0	6	110	1	21128	HRG
GO:BP,	regulation of DNA metabolic process	GO:0051052	1	0	535	110	2	21128	H1-4,PTPRC
GO:BP,	actin filament bundle assembly	GO:0051017	1	0	158	110	3	21128	LCP1,SERPINF2,PDLIM1
GO:BP,	negative regulation of antigen receptor-mediated signaling pathway	GO:0050858	1	0	33	110	1	21128	PTPN6
GO:BP,	negative regulation of T cell receptor signaling pathway	GO:0050860	1	0	26	110	1	21128	PTPN6
GO:BP,	regulation of T cell activation	GO:0050863	1	0	373	110	5	21128	FGL1,CORO1A,PTPN6,PTPRC,IL6ST
GO:BP,	negative regulation of cell activation	GO:0050866	1	0	216	110	4	21128	FGG,FGL1,PTPN6,PTPRC
GO:BP,	negative regulation of T cell activation	GO:0050868	1	0	127	110	2	21128	FGL1,PTPN6
GO:BP,	positive regulation of T cell activation	GO:0050870	1	0	247	110	4	21128	CORO1A,PTPN6,PTPRC,IL6ST
GO:BP,	nervous system process	GO:0050877	1	0	1518	110	4	21128	AZGP1,RBP4,CD36,RP2
GO:BP,	endocrine process	GO:0050886	1	0	93	110	1	21128	SERPINF2
GO:BP,	intestinal absorption	GO:0050892	1	0	42	110	1	21128	CD36
GO:BP,	leukocyte tethering or rolling	GO:0050901	1	0	34	110	2	21128	SELP,GP1BA
GO:BP,	diapedesis	GO:0050904	1	0	7	110	1	21128	PECAM1
GO:BP,	detection of stimulus involved in sensory perception	GO:0050906	1	0	514	110	1	21128	AZGP1
GO:BP,	detection of chemical stimulus involved in sensory perception	GO:0050907	1	0	445	110	1	21128	AZGP1
GO:BP,	sensory perception of taste	GO:0050909	1	0	69	110	2	21128	AZGP1,CD36
GO:BP,	detection of chemical stimulus involved in sensory perception of taste	GO:0050912	1	0	43	110	1	21128	AZGP1
GO:BP,	sensory perception of bitter taste	GO:0050913	1	0	42	110	1	21128	AZGP1
GO:BP,	positive chemotaxis	GO:0050918	1	0	64	110	1	21128	CORO1A
GO:BP,	negative chemotaxis	GO:0050919	1	0	48	110	1	21128	ITGB3
GO:BP,	regulation of chemotaxis	GO:0050920	1	0	224	110	2	21128	HRG,PTK2
GO:BP,	positive regulation of chemotaxis	GO:0050921	1	0	144	110	1	21128	PTK2
GO:BP,	negative regulation of chemotaxis	GO:0050922	1	0	62	110	1	21128	HRG
GO:BP,	sensory perception of light stimulus	GO:0050953	1	0	224	110	2	21128	RBP4,RP2
GO:BP,	detection of mechanical stimulus	GO:0050982	1	0	53	110	1	21128	PTK2
GO:BP,	negative regulation of transport	GO:0051051	1	0	431	110	3	21128	ITGB3,CORO1A,CD36
GO:BP,	sensory organ morphogenesis	GO:0090596	1	0	284	110	1	21128	RBP4
GO:BP,	acetylcholine receptor signaling pathway	GO:0095500	1	0	29	110	1	21128	RGS10
GO:BP,	ubiquitin-independent protein catabolic process via the multivesicular body sorting pathway	GO:0090611	1	0	5	110	1	21128	VPS4A
GO:BP,	negative regulation of neuron death	GO:1901215	1	0	216	110	2	21128	CORO1A,IL6ST
GO:BP,	positive regulation of neuron death	GO:1901216	1	0	93	110	1	21128	ITGB2
GO:BP,	regulation of NIK/NF-kappaB signaling	GO:1901222	1	0	100	110	2	21128	LIMS1,MMP8
GO:BP,	positive regulation of NIK/NF-kappaB signaling	GO:1901224	1	0	66	110	2	21128	LIMS1,MMP8
GO:BP,	nucleoside phosphate catabolic process	GO:1901292	1	0	87	110	2	21128	VCP,DPYD
GO:BP,	nucleoside phosphate biosynthetic process	GO:1901293	1	0	321	110	2	21128	VCP,CDA
GO:BP,	regulation of vasculature development	GO:1901342	1	0	291	110	4	21128	HRG,ITGB3,PF4,ITGB2
GO:BP,	negative regulation of vasculature development	GO:1901343	1	0	104	110	2	21128	HRG,PF4
GO:BP,	organic cyclic compound metabolic process	GO:1901360	1	0	8584	110	25	21128	VCP,LTF,SERPINF2,PDLIM1,S100A12,AZGP1,LIMS1,ENDOD1,S100A8,CDA,PF4,ITGA6,H1-4,S100A9,ITGB2,WBP2,PTPRC,CD36,PITHD1,TGFB1I1,TSG101,RWDD1,DPYD,ZNF578,ASH1L
GO:BP,	organic cyclic compound catabolic process	GO:1901361	1	0	509	110	3	21128	VCP,CDA,DPYD
GO:BP,	organic cyclic compound biosynthetic process	GO:1901362	1	0	4307	110	21	21128	VCP,LTF,SERPINF2,PDLIM1,S100A12,LIMS1,S100A8,CDA,PF4,ITGA6,H1-4,S100A9,ITGB2,WBP2,CD36,PITHD1,TGFB1I1,TSG101,RWDD1,ZNF578,ASH1L
GO:BP,	organonitrogen compound metabolic process	GO:1901564	1	0	6538	110	49	21128	A2M,FGB,FGG,FGA,C4A,PLG,VCP,C4BPA,LTF,HRG,SERPINF2,ITGB3,F13B,S100A12,GP5,GP1BA,MASP1,S100A8,PTPN6,CPB2,MMP8,MLEC,CDA,PECAM1,CANX,H1-4,PTPA,CPN1,APOM,S100A9,ITGB2,WBP2,PTPRC,PTK2,CD36,COLEC11,C4BPB,PITHD1,TGFB1I1,IL6ST,GUSB,TSG101,MASP2,RWDD1,DPYD,PIK3C3,VPS4A,CKMT2,ASH1L
GO:BP,	organonitrogen compound catabolic process	GO:1901565	1	0	1386	110	14	21128	VCP,C4BPA,CPB2,CDA,CANX,CPN1,PTK2,C4BPB,PITHD1,TGFB1I1,GUSB,TSG101,DPYD,VPS4A
GO:BP,	organonitrogen compound biosynthetic process	GO:1901566	1	0	1805	110	7	21128	VCP,MLEC,CDA,RWDD1,DPYD,PIK3C3,CKMT2
GO:BP,	organic substance catabolic process	GO:1901575	1	0	2148	110	15	21128	VCP,C4BPA,CPB2,CDA,CANX,CPN1,PTK2,PLBD1,C4BPB,PITHD1,TGFB1I1,GUSB,TSG101,DPYD,VPS4A
GO:BP,	organic substance biosynthetic process	GO:1901576	1	0	5886	110	26	21128	VCP,LTF,SERPINF2,PDLIM1,S100A12,LIMS1,S100A8,RBP4,MLEC,CDA,PF4,ITGA6,H1-4,S100A9,ITGB2,WBP2,CD36,PITHD1,TGFB1I1,TSG101,RWDD1,DPYD,PIK3C3,CKMT2,ZNF578,ASH1L
GO:BP,	regulation of acid-sensing ion channel activity	GO:1901585	1	0	1	110	1	21128	STOM
GO:BP,	organic hydroxy compound metabolic process	GO:1901615	1	0	561	110	2	21128	RBP4,ITGB2
GO:BP,	response to peptide	GO:1901652	1	0	497	110	5	21128	ITGB3,CA2,GRB2,PTK2,CD36
GO:BP,	cellular response to peptide	GO:1901653	1	0	363	110	5	21128	ITGB3,CA2,GRB2,PTK2,CD36
GO:BP,	response to ketone	GO:1901654	1	0	211	110	4	21128	A2M,CDA,WBP2,RWDD1
GO:BP,	cellular response to ketone	GO:1901655	1	0	111	110	1	21128	RWDD1
GO:BP,	glycosyl compound metabolic process	GO:1901657	1	0	80	110	3	21128	CDA,GUSB,DPYD
GO:BP,	regulation of neuron death	GO:1901214	1	0	324	110	3	21128	CORO1A,ITGB2,IL6ST
GO:BP,	negative regulation of ERBB signaling pathway	GO:1901185	1	0	32	110	1	21128	TSG101
GO:BP,	regulation of ERBB signaling pathway	GO:1901184	1	0	79	110	1	21128	TSG101
GO:BP,	negative regulation of trophoblast cell migration	GO:1901164	1	0	6	110	1	21128	ARHGDIB
GO:BP,	positive regulation of bone mineralization involved in bone maturation	GO:1900159	1	0	3	110	1	21128	LTF
GO:BP,	regulation of protein localization to nucleus	GO:1900180	1	0	138	110	1	21128	CD36
GO:BP,	negative regulation of protein localization to nucleus	GO:1900181	1	0	36	110	1	21128	CD36
GO:BP,	regulation of single-species biofilm formation	GO:1900190	1	0	2	110	1	21128	LTF
GO:BP,	negative regulation of single-species biofilm formation	GO:1900191	1	0	2	110	1	21128	LTF
GO:BP,	regulation of NLRP3 inflammasome complex assembly	GO:1900225	1	0	20	110	1	21128	CD36
GO:BP,	positive regulation of NLRP3 inflammasome complex assembly	GO:1900227	1	0	12	110	1	21128	CD36
GO:BP,	regulation of single-species biofilm formation in or on host organism	GO:1900228	1	0	2	110	1	21128	LTF
GO:BP,	negative regulation of single-species biofilm formation in or on host organism	GO:1900229	1	0	2	110	1	21128	LTF
GO:BP,	regulation of purine nucleotide biosynthetic process	GO:1900371	1	0	42	110	1	21128	VCP
GO:BP,	positive regulation of purine nucleotide biosynthetic process	GO:1900373	1	0	26	110	1	21128	VCP
GO:BP,	glycosyl compound catabolic process	GO:1901658	1	0	33	110	3	21128	CDA,GUSB,DPYD
GO:BP,	regulation of cellular response to oxidative stress	GO:1900407	1	0	82	110	1	21128	CD36
GO:BP,	positive regulation of purine nucleotide metabolic process	GO:1900544	1	0	48	110	1	21128	VCP
GO:BP,	regulation of adenylate cyclase-inhibiting opioid receptor signaling pathway	GO:1900729	1	0	1	110	1	21128	ITGB3
GO:BP,	positive regulation of adenylate cyclase-inhibiting opioid receptor signaling pathway	GO:1900731	1	0	1	110	1	21128	ITGB3
GO:BP,	regulation of vascular endothelial growth factor signaling pathway	GO:1900746	1	0	22	110	1	21128	HRG
GO:BP,	negative regulation of vascular endothelial growth factor signaling pathway	GO:1900747	1	0	11	110	1	21128	HRG
GO:BP,	regulation of response to reactive oxygen species	GO:1901031	1	0	33	110	1	21128	CD36
GO:BP,	negative regulation of signal transduction in absence of ligand	GO:1901099	1	0	36	110	1	21128	PF4
GO:BP,	carbohydrate derivative metabolic process	GO:1901135	1	0	1125	110	5	21128	VCP,MLEC,CDA,GUSB,DPYD
GO:BP,	carbohydrate derivative catabolic process	GO:1901136	1	0	173	110	3	21128	CDA,GUSB,DPYD
GO:BP,	carbohydrate derivative biosynthetic process	GO:1901137	1	0	676	110	3	21128	VCP,MLEC,CDA
GO:BP,	regulation of trophoblast cell migration	GO:1901163	1	0	15	110	2	21128	ITGB3,ARHGDIB
GO:BP,	regulation of purine nucleotide metabolic process	GO:1900542	1	0	98	110	1	21128	VCP
GO:BP,	regulation of bone mineralization involved in bone maturation	GO:1900157	1	0	7	110	1	21128	LTF
GO:BP,	iron coordination entity transport	GO:1901678	1	0	14	110	2	21128	HRG,LCN2
GO:BP,	cellular response to nitrogen compound	GO:1901699	1	0	698	110	6	21128	ITGB3,CA2,GRB2,RGS10,PTK2,CD36
GO:BP,	positive regulation of neutrophil activation	GO:1902565	1	0	6	110	1	21128	ITGB2
GO:BP,	negative regulation of RNA biosynthetic process	GO:1902679	1	0	1327	110	4	21128	LIMS1,H1-4,CD36,TSG101
GO:BP,	positive regulation of RNA biosynthetic process	GO:1902680	1	0	1710	110	9	21128	SERPINF2,PDLIM1,PF4,ITGA6,WBP2,PITHD1,TGFB1I1,TSG101,ASH1L
GO:BP,	regulation of receptor localization to synapse	GO:1902683	1	0	18	110	1	21128	STX7
GO:BP,	positive regulation of receptor localization to synapse	GO:1902685	1	0	4	110	1	21128	STX7
GO:BP,	positive regulation of chondrocyte proliferation	GO:1902732	1	0	9	110	1	21128	LTF
GO:BP,	regulation of lamellipodium organization	GO:1902743	1	0	53	110	1	21128	HRG
GO:BP,	negative regulation of lamellipodium organization	GO:1902744	1	0	6	110	1	21128	HRG
GO:BP,	regulation of cell cycle G2/M phase transition	GO:1902749	1	0	110	110	1	21128	VPS4A
GO:BP,	negative regulation of cell cycle G2/M phase transition	GO:1902750	1	0	65	110	1	21128	VPS4A
GO:BP,	late endosome to lysosome transport	GO:1902774	1	0	23	110	1	21128	VPS4A
GO:BP,	regulation of cell cycle G1/S phase transition	GO:1902806	1	0	189	110	1	21128	PTPN6
GO:BP,	microtubule cytoskeleton organization involved in mitosis	GO:1902850	1	0	168	110	2	21128	VCP,PTPA
GO:BP,	regulation of response to oxidative stress	GO:1902882	1	0	91	110	1	21128	CD36
GO:BP,	regulation of supramolecular fiber organization	GO:1902903	1	0	381	110	3	21128	SERPINF2,CORO1A,GRB2
GO:BP,	negative regulation of supramolecular fiber organization	GO:1902904	1	0	167	110	1	21128	CORO1A
GO:BP,	positive regulation of supramolecular fiber organization	GO:1902905	1	0	175	110	2	21128	SERPINF2,GRB2
GO:BP,	positive regulation of protein deubiquitination	GO:1903003	1	0	6	110	1	21128	VCP
GO:BP,	regulation of protein K63-linked deubiquitination	GO:1903004	1	0	2	110	1	21128	VCP
GO:BP,	positive regulation of protein K63-linked deubiquitination	GO:1903006	1	0	2	110	1	21128	VCP
GO:BP,	positive regulation of Lys63-specific deubiquitinase activity	GO:1903007	1	0	1	110	1	21128	VCP
GO:BP,	organelle disassembly	GO:1903008	1	0	140	110	1	21128	VCP
GO:BP,	positive regulation of opsonization	GO:1903028	1	0	9	110	1	21128	COLEC11
GO:BP,	regulation of neutrophil activation	GO:1902563	1	0	14	110	1	21128	ITGB2
GO:BP,	negative regulation of cellular response to vascular endothelial growth factor stimulus	GO:1902548	1	0	13	110	1	21128	HRG
GO:BP,	regulation of cellular response to vascular endothelial growth factor stimulus	GO:1902547	1	0	24	110	1	21128	HRG
GO:BP,	negative regulation of intracellular signal transduction	GO:1902532	1	0	514	110	3	21128	PTPN6,PTPRC,ASH1L
GO:BP,	cellular response to oxygen-containing compound	GO:1901701	1	0	1191	110	13	21128	VCP,LTF,ITGB3,CA2,PPBP,CPB2,PF4,GRB2,PF4V1,RGS10,PTK2,CD36,RWDD1
GO:BP,	regulation of cell proliferation involved in kidney development	GO:1901722	1	0	14	110	1	21128	ITGB3
GO:BP,	positive regulation of cell proliferation involved in kidney development	GO:1901724	1	0	9	110	1	21128	ITGB3
GO:BP,	positive regulation of platelet aggregation	GO:1901731	1	0	11	110	1	21128	IL6ST
GO:BP,	positive regulation of proteasomal protein catabolic process	GO:1901800	1	0	119	110	1	21128	VCP
GO:BP,	positive regulation of cellular respiration	GO:1901857	1	0	14	110	1	21128	VCP
GO:BP,	regulation of cell junction assembly	GO:1901888	1	0	206	110	3	21128	HRG,LIMS1,PTK2
GO:BP,	positive regulation of cell junction assembly	GO:1901890	1	0	107	110	2	21128	HRG,LIMS1
GO:BP,	regulation of protein acetylation	GO:1901983	1	0	89	110	1	21128	WBP2
GO:BP,	positive regulation of protein acetylation	GO:1901985	1	0	50	110	1	21128	WBP2
GO:BP,	regulation of cell cycle phase transition	GO:1901987	1	0	432	110	2	21128	PTPN6,VPS4A
GO:BP,	response to nitrogen compound	GO:1901698	1	0	1123	110	11	21128	VCP,ITGB3,CA2,CDA,CANX,GRB2,ITGB2,RGS10,PTK2,CD36,PIK3C3
GO:BP,	negative regulation of cell cycle phase transition	GO:1901988	1	0	256	110	1	21128	VPS4A
GO:BP,	negative regulation of mitotic cell cycle phase transition	GO:1901991	1	0	178	110	1	21128	VPS4A
GO:BP,	fatty acid transmembrane transport	GO:1902001	1	0	18	110	1	21128	CD36
GO:BP,	regulation of extrinsic apoptotic signaling pathway via death domain receptors	GO:1902041	1	0	48	110	3	21128	FGB,FGG,FGA
GO:BP,	regulation of leukocyte differentiation	GO:1902105	1	0	316	110	4	21128	LTF,PTPN6,PF4,PTPRC
GO:BP,	negative regulation of leukocyte differentiation	GO:1902106	1	0	105	110	1	21128	LTF
GO:BP,	positive regulation of leukocyte differentiation	GO:1902107	1	0	184	110	2	21128	PF4,PTPRC
GO:BP,	regulation of organelle assembly	GO:1902115	1	0	210	110	3	21128	LCP1,TSG101,ASAP1
GO:BP,	positive regulation of organelle assembly	GO:1902117	1	0	83	110	2	21128	LCP1,ASAP1
GO:BP,	regulation of sodium ion transmembrane transport	GO:1902305	1	0	60	110	1	21128	STOM
GO:BP,	mitotic cytokinetic process	GO:1902410	1	0	25	110	1	21128	VPS4A
GO:BP,	protein localization to cell junction	GO:1902414	1	0	100	110	2	21128	PECAM1,RAB27B
GO:BP,	regulation of mitotic cell cycle phase transition	GO:1901990	1	0	331	110	2	21128	PTPN6,VPS4A
GO:BP,	regulation of leukocyte cell-cell adhesion	GO:1903037	1	0	365	110	8	21128	SELP,FGL1,GP1BA,CORO1A,PTPN6,ITGB2,PTPRC,IL6ST
GO:BP,	cell-cell signaling by wnt	GO:0198738	1	0	450	110	2	21128	VCP,TGFB1I1
GO:BP,	regulation of cell-substrate junction organization	GO:0150116	1	0	69	110	3	21128	HRG,LIMS1,PTK2
GO:BP,	inorganic cation transmembrane transport	GO:0098662	1	0	828	110	7	21128	ITGB3,GP5,GP1BA,CORO1A,PTPN6,PTPRC,STOM
GO:BP,	import across plasma membrane	GO:0098739	1	0	197	110	1	21128	CD36
GO:BP,	cell-cell adhesion via plasma-membrane adhesion molecules	GO:0098742	1	0	285	110	3	21128	SELP,PECAM1,ITGB2
GO:BP,	cell aggregation	GO:0098743	1	0	23	110	1	21128	LTF
GO:BP,	response to interleukin-7	GO:0098760	1	0	15	110	1	21128	LSP1
GO:BP,	cellular response to interleukin-7	GO:0098761	1	0	15	110	1	21128	LSP1
GO:BP,	inorganic ion homeostasis	GO:0098771	1	0	548	110	10	21128	LTF,ITGB3,LCN2,GP5,GP1BA,CORO1A,S100A8,PTPN6,S100A9,PTPRC
GO:BP,	neurotransmitter reuptake	GO:0098810	1	0	36	110	1	21128	ITGB3
GO:BP,	nuclear chromosome segregation	GO:0098813	1	0	340	110	1	21128	VPS4A
GO:BP,	protein transport along microtubule	GO:0098840	1	0	14	110	1	21128	RAB27B
GO:BP,	intestinal lipid absorption	GO:0098856	1	0	23	110	1	21128	CD36
GO:BP,	postsynaptic neurotransmitter receptor internalization	GO:0098884	1	0	20	110	1	21128	ITGB3
GO:BP,	regulation of action potential	GO:0098900	1	0	57	110	1	21128	CD36
GO:BP,	anterograde trans-synaptic signaling	GO:0098916	1	0	724	110	2	21128	PLG,CA2
GO:BP,	postsynaptic signal transduction	GO:0098926	1	0	41	110	1	21128	RGS10
GO:BP,	vesicle-mediated transport between endosomal compartments	GO:0098927	1	0	43	110	2	21128	CORO1A,PIK3C3
GO:BP,	axonal transport	GO:0098930	1	0	64	110	1	21128	RAB27B
GO:BP,	vesicle-mediated transport in synapse	GO:0099003	1	0	217	110	4	21128	ITGB3,CANX,RAB27B,ITSN2
GO:BP,	regulation of postsynaptic membrane neurotransmitter receptor levels	GO:0099072	1	0	66	110	1	21128	ITGB3
GO:BP,	microtubule-based transport	GO:0099111	1	0	208	110	1	21128	RAB27B
GO:BP,	microtubule-based protein transport	GO:0099118	1	0	14	110	1	21128	RAB27B
GO:BP,	regulation of postsynaptic neurotransmitter receptor internalization	GO:0099149	1	0	13	110	1	21128	ITGB3
GO:BP,	regulation of trans-synaptic signaling	GO:0099177	1	0	456	110	1	21128	CA2
GO:BP,	inorganic ion transmembrane transport	GO:0098660	1	0	920	110	7	21128	ITGB3,GP5,GP1BA,CORO1A,PTPN6,PTPRC,STOM
GO:BP,	import into cell	GO:0098657	1	0	247	110	3	21128	ITGB3,CD36,TSG101
GO:BP,	monoatomic cation transmembrane transport	GO:0098655	1	0	855	110	7	21128	ITGB3,GP5,GP1BA,CORO1A,PTPN6,PTPRC,STOM
GO:BP,	aggregation of unicellular organisms	GO:0098630	1	0	2	110	1	21128	LTF
GO:BP,	regulation of plasma lipoprotein particle levels	GO:0097006	1	0	71	110	2	21128	APOM,CD36
GO:BP,	energy homeostasis	GO:0097009	1	0	43	110	1	21128	CD36
GO:BP,	receptor localization to synapse	GO:0097120	1	0	58	110	1	21128	STX7
GO:BP,	apoptotic signaling pathway	GO:0097190	1	0	597	110	8	21128	FGB,FGG,FGA,S100A8,PF4,ITGA6,S100A9,PTPRC
GO:BP,	extrinsic apoptotic signaling pathway	GO:0097191	1	0	224	110	6	21128	FGB,FGG,FGA,PF4,ITGA6,PTPRC
GO:BP,	extrinsic apoptotic signaling pathway in absence of ligand	GO:0097192	1	0	70	110	1	21128	PF4
GO:BP,	intrinsic apoptotic signaling pathway	GO:0097193	1	0	299	110	2	21128	S100A8,S100A9
GO:BP,	execution phase of apoptosis	GO:0097194	1	0	72	110	1	21128	COLEC11
GO:BP,	amyloid-beta clearance	GO:0097242	1	0	37	110	2	21128	ITGB2,CD36
GO:BP,	response to alcohol	GO:0097305	1	0	251	110	3	21128	A2M,S100A8,CDA
GO:BP,	plasma membrane tubulation	GO:0097320	1	0	20	110	2	21128	BIN2,ASAP1
GO:BP,	trans-synaptic signaling by BDNF, modulating synaptic transmission	GO:0099183	1	0	4	110	1	21128	PLG
GO:BP,	liver regeneration	GO:0097421	1	0	30	110	1	21128	CPB2
GO:BP,	dendrite extension	GO:0097484	1	0	35	110	1	21128	ITSN2
GO:BP,	neuron projection guidance	GO:0097485	1	0	241	110	1	21128	PTK2
GO:BP,	sequestering of iron ion	GO:0097577	1	0	6	110	1	21128	LCN2
GO:BP,	lamellipodium organization	GO:0097581	1	0	91	110	1	21128	HRG
GO:BP,	nucleic acid-templated transcription	GO:0097659	1	0	3585	110	19	21128	LTF,SERPINF2,PDLIM1,S100A12,LIMS1,S100A8,PF4,ITGA6,H1-4,S100A9,ITGB2,WBP2,CD36,PITHD1,TGFB1I1,TSG101,RWDD1,ZNF578,ASH1L
GO:BP,	histone H3-K36 dimethylation	GO:0097676	1	0	4	110	1	21128	ASH1L
GO:BP,	receptor signaling pathway via STAT	GO:0097696	1	0	173	110	2	21128	PTPRC,IL6ST
GO:BP,	sperm motility	GO:0097722	1	0	136	110	1	21128	ASH1L
GO:BP,	extracellular exosome biogenesis	GO:0097734	1	0	21	110	2	21128	TSG101,VPS4A
GO:BP,	blood vessel diameter maintenance	GO:0097746	1	0	143	110	5	21128	FGB,FGG,FGA,HBB,SERPINF2
GO:BP,	histone H3-K27 trimethylation	GO:0098532	1	0	10	110	1	21128	H1-4
GO:BP,	supramolecular fiber organization	GO:0097435	1	0	814	110	7	21128	LCP1,SERPINF2,PDLIM1,CORO1A,GRB2,IQGAP2,CD36
GO:BP,	positive regulation of cell-substrate junction organization	GO:0150117	1	0	31	110	2	21128	HRG,LIMS1
GO:BP,	trans-synaptic signaling by BDNF	GO:0099191	1	0	5	110	1	21128	PLG
GO:BP,	synaptic vesicle endosomal processing	GO:0099532	1	0	9	110	1	21128	ITSN2
GO:BP,	extracellular vesicle biogenesis	GO:0140112	1	0	23	110	2	21128	TSG101,VPS4A
GO:BP,	presynaptic endocytosis	GO:0140238	1	0	67	110	3	21128	CANX,RAB27B,ITSN2
GO:BP,	postsynaptic endocytosis	GO:0140239	1	0	20	110	1	21128	ITGB3
GO:BP,	export from cell	GO:0140352	1	0	871	110	13	21128	FGB,FGG,FGA,CORO1A,RBP4,CPB2,UNC13D,CANX,ITGB2,RAB27B,TSG101,PIK3C3,VPS4A
GO:BP,	lipid import into cell	GO:0140354	1	0	19	110	1	21128	CD36
GO:BP,	defense response to symbiont	GO:0140546	1	0	305	110	2	21128	UNC13D,PTPRC
GO:BP,	inflammasome complex assembly	GO:0140632	1	0	24	110	1	21128	CD36
GO:BP,	non-membrane-bounded organelle assembly	GO:0140694	1	0	386	110	3	21128	LCP1,BIN2,ASAP1
GO:BP,	interferon-mediated signaling pathway	GO:0140888	1	0	101	110	1	21128	PTPN6
GO:BP,	cell surface toll-like receptor signaling pathway	GO:0140895	1	0	48	110	1	21128	LTF
GO:BP,	disruption of cellular component of another organism	GO:0140975	1	0	17	110	1	21128	LTF
GO:BP,	clathrin-dependent synaptic vesicle endocytosis	GO:0150007	1	0	3	110	1	21128	ITSN2
GO:BP,	oxidised low-density lipoprotein particle clearance	GO:0150024	1	0	1	110	1	21128	CD36
GO:BP,	visual system development	GO:0150063	1	0	402	110	1	21128	RBP4
GO:BP,	neuroinflammatory response	GO:0150076	1	0	68	110	3	21128	MMP8,ITGB2,PTPRC
GO:BP,	regulation of neuroinflammatory response	GO:0150077	1	0	34	110	2	21128	MMP8,PTPRC
GO:BP,	positive regulation of neuroinflammatory response	GO:0150078	1	0	15	110	1	21128	MMP8
GO:BP,	negative regulation of neuroinflammatory response	GO:0150079	1	0	14	110	1	21128	PTPRC
GO:BP,	amyloid-beta clearance by cellular catabolic process	GO:0150094	1	0	8	110	1	21128	CD36
GO:BP,	transport across blood-brain barrier	GO:0150104	1	0	87	110	1	21128	CD36
GO:BP,	protein localization to cell-cell junction	GO:0150105	1	0	21	110	1	21128	PECAM1
GO:BP,	late endosome to vacuole transport	GO:0045324	1	0	36	110	2	21128	TSG101,VPS4A
GO:BP,	positive regulation of protein localization to cell-cell junction	GO:0150107	1	0	1	110	1	21128	PECAM1
GO:BP,	organelle localization by membrane tethering	GO:0140056	1	0	82	110	1	21128	STX7
GO:BP,	cellular response to oxidised low-density lipoprotein particle stimulus	GO:0140052	1	0	11	110	1	21128	CD36
GO:BP,	mitotic nuclear division	GO:0140014	1	0	294	110	1	21128	VPS4A
GO:BP,	olefinic compound metabolic process	GO:0120254	1	0	159	110	1	21128	RBP4
GO:BP,	synaptic signaling	GO:0099536	1	0	756	110	3	21128	PLG,CA2,RGS10
GO:BP,	trans-synaptic signaling	GO:0099537	1	0	731	110	2	21128	PLG,CA2
GO:BP,	trans-synaptic signaling, modulating synaptic transmission	GO:0099550	1	0	13	110	1	21128	PLG
GO:BP,	neurotransmitter receptor internalization	GO:0099590	1	0	27	110	1	21128	ITGB3
GO:BP,	axo-dendritic protein transport	GO:0099640	1	0	9	110	1	21128	RAB27B
GO:BP,	anterograde axonal protein transport	GO:0099641	1	0	8	110	1	21128	RAB27B
GO:BP,	mitotic nuclear membrane organization	GO:0101024	1	0	9	110	1	21128	VPS4A
GO:BP,	cellular response to environmental stimulus	GO:0104004	1	0	336	110	2	21128	ITGB3,GRB2
GO:BP,	cold-induced thermogenesis	GO:0106106	1	0	147	110	2	21128	LCN2,CD36
GO:BP,	protein-DNA covalent cross-linking repair	GO:0106300	1	0	7	110	1	21128	VCP
GO:BP,	regulation of actomyosin structure organization	GO:0110020	1	0	98	110	1	21128	SERPINF2
GO:BP,	synaptic vesicle cycle	GO:0099504	1	0	196	110	3	21128	CANX,RAB27B,ITSN2
GO:BP,	regulation of actin filament organization	GO:0110053	1	0	276	110	3	21128	SERPINF2,CORO1A,GRB2
GO:BP,	regulation of plasma membrane bounded cell projection assembly	GO:0120032	1	0	199	110	1	21128	HRG
GO:BP,	negative regulation of plasma membrane bounded cell projection assembly	GO:0120033	1	0	35	110	1	21128	HRG
GO:BP,	regulation of plasma membrane bounded cell projection organization	GO:0120035	1	0	640	110	3	21128	HRG,ITGA6,S100A9
GO:BP,	plasma membrane bounded cell projection organization	GO:0120036	1	0	1518	110	9	21128	HRG,CORO1A,MANF,ITGA6,S100A9,PTK2,RP2,ITSN2,ASAP1
GO:BP,	plasma membrane bounded cell projection morphogenesis	GO:0120039	1	0	651	110	2	21128	PTK2,ITSN2
GO:BP,	regulation of macrophage proliferation	GO:0120040	1	0	7	110	1	21128	PTK2
GO:BP,	positive regulation of macrophage proliferation	GO:0120041	1	0	6	110	1	21128	PTK2
GO:BP,	regulation of cold-induced thermogenesis	GO:0120161	1	0	147	110	2	21128	LCN2,CD36
GO:BP,	positive regulation of cold-induced thermogenesis	GO:0120162	1	0	98	110	2	21128	LCN2,CD36
GO:BP,	tight junction assembly	GO:0120192	1	0	71	110	1	21128	PECAM1
GO:BP,	tight junction organization	GO:0120193	1	0	77	110	1	21128	PECAM1
GO:BP,	plasma membrane bounded cell projection assembly	GO:0120031	1	0	572	110	3	21128	HRG,RP2,ASAP1
GO:BP,	negative regulation of leukocyte cell-cell adhesion	GO:1903038	1	0	138	110	2	21128	FGL1,PTPN6
GO:BP,	regulation of proteolysis involved in protein catabolic process	GO:1903050	1	0	231	110	3	21128	VCP,PTK2,PITHD1
GO:BP,	regulation of endothelial cell apoptotic process	GO:2000351	1	0	51	110	3	21128	FGB,FGG,FGA
GO:BP,	negative regulation of endothelial cell apoptotic process	GO:2000352	1	0	31	110	3	21128	FGB,FGG,FGA
GO:BP,	regulation of prostaglandin-E synthase activity	GO:2000361	1	0	3	110	1	21128	ITGB2
GO:BP,	positive regulation of prostaglandin-E synthase activity	GO:2000363	1	0	3	110	1	21128	ITGB2
GO:BP,	regulation of reactive oxygen species metabolic process	GO:2000377	1	0	142	110	4	21128	MMP8,GRB2,ITGB2,CD36
GO:BP,	regulation of ubiquitin-dependent endocytosis	GO:2000395	1	0	2	110	1	21128	TSG101
GO:BP,	positive regulation of ubiquitin-dependent endocytosis	GO:2000397	1	0	2	110	1	21128	TSG101
GO:BP,	regulation of lymphocyte migration	GO:2000401	1	0	69	110	2	21128	ITGB3,CORO1A
GO:BP,	positive regulation of lymphocyte migration	GO:2000403	1	0	43	110	2	21128	ITGB3,CORO1A
GO:BP,	regulation of T cell migration	GO:2000404	1	0	49	110	2	21128	ITGB3,CORO1A
GO:BP,	positive regulation of T cell migration	GO:2000406	1	0	35	110	2	21128	ITGB3,CORO1A
GO:BP,	regulation of apoptotic cell clearance	GO:2000425	1	0	10	110	1	21128	C4A
GO:BP,	positive regulation of apoptotic cell clearance	GO:2000427	1	0	8	110	1	21128	C4A
GO:BP,	regulation of hematopoietic stem cell migration	GO:2000471	1	0	2	110	1	21128	PTPRC
GO:BP,	positive regulation of hematopoietic stem cell migration	GO:2000473	1	0	2	110	1	21128	PTPRC
GO:BP,	regulation of opioid receptor signaling pathway	GO:2000474	1	0	3	110	1	21128	ITGB3
GO:BP,	positive regulation of opioid receptor signaling pathway	GO:2000476	1	0	1	110	1	21128	ITGB3
GO:BP,	positive regulation of blood vessel remodeling	GO:2000504	1	0	2	110	1	21128	HRG
GO:BP,	positive regulation of stem cell proliferation	GO:2000648	1	0	57	110	1	21128	PTPRC
GO:BP,	regulation of sodium ion transmembrane transporter activity	GO:2000649	1	0	51	110	1	21128	STOM
GO:BP,	regulation of peptidyl-lysine acetylation	GO:2000756	1	0	75	110	1	21128	WBP2
GO:BP,	positive regulation of peptidyl-lysine acetylation	GO:2000758	1	0	40	110	1	21128	WBP2
GO:BP,	negative regulation of anoikis	GO:2000811	1	0	18	110	1	21128	PTK2
GO:BP,	negative regulation of hepatocyte proliferation	GO:2000346	1	0	4	110	1	21128	CPB2
GO:BP,	regulation of hepatocyte proliferation	GO:2000345	1	0	17	110	1	21128	CPB2
GO:BP,	positive regulation of blood microparticle formation	GO:2000334	1	0	2	110	1	21128	CD36
GO:BP,	regulation of blood microparticle formation	GO:2000332	1	0	2	110	1	21128	CD36
GO:BP,	regulation of multicellular organismal development	GO:2000026	1	0	1400	110	10	21128	LTF,HRG,ITGB3,RBP4,PTPN6,PF4,ITGB2,PTPRC,PITHD1,IL6ST
GO:BP,	regulation of G1/S transition of mitotic cell cycle	GO:2000045	1	0	161	110	1	21128	PTPN6
GO:BP,	regulation of cell-cell adhesion mediated by cadherin	GO:2000047	1	0	21	110	2	21128	PLG,SERPINF2
GO:BP,	negative regulation of cell-cell adhesion mediated by cadherin	GO:2000048	1	0	10	110	1	21128	PLG
GO:BP,	positive regulation of cell-cell adhesion mediated by cadherin	GO:2000049	1	0	11	110	1	21128	SERPINF2
GO:BP,	regulation of ubiquitin-dependent protein catabolic process	GO:2000058	1	0	173	110	2	21128	VCP,PTK2
GO:BP,	positive regulation of ubiquitin-dependent protein catabolic process	GO:2000060	1	0	112	110	2	21128	VCP,PTK2
GO:BP,	regulation of cysteine-type endopeptidase activity	GO:2000116	1	0	234	110	4	21128	VCP,LTF,S100A8,S100A9
GO:BP,	negative regulation of cysteine-type endopeptidase activity	GO:2000117	1	0	90	110	1	21128	LTF
GO:BP,	regulation of removal of superoxide radicals	GO:2000121	1	0	6	110	1	21128	CD36
GO:BP,	regulation of cell motility	GO:2000145	1	0	988	110	10	21128	HRG,ITGB3,SELP,ARHGDIB,GP1BA,CORO1A,PECAM1,ITGA6,PTPRC,PTK2
GO:BP,	positive regulation of androgen receptor activity	GO:2000825	1	0	5	110	1	21128	RWDD1
GO:BP,	negative regulation of cell motility	GO:2000146	1	0	304	110	2	21128	HRG,ARHGDIB
GO:BP,	regulation of ubiquitin-specific protease activity	GO:2000152	1	0	6	110	1	21128	VCP
GO:BP,	positive regulation of ubiquitin-specific protease activity	GO:2000158	1	0	3	110	1	21128	VCP
GO:BP,	negative regulation of blood vessel morphogenesis	GO:2000181	1	0	103	110	2	21128	HRG,PF4
GO:BP,	regulation of anoikis	GO:2000209	1	0	25	110	1	21128	PTK2
GO:BP,	regulation of reproductive process	GO:2000241	1	0	207	110	2	21128	ITGB3,ARHGDIB
GO:BP,	negative regulation of reproductive process	GO:2000242	1	0	74	110	1	21128	ARHGDIB
GO:BP,	regulation of actin cytoskeleton reorganization	GO:2000249	1	0	43	110	2	21128	ARHGDIB,IQGAP2
GO:BP,	negative regulation of signaling receptor activity	GO:2000272	1	0	50	110	1	21128	TSG101
GO:BP,	positive regulation of signaling receptor activity	GO:2000273	1	0	46	110	1	21128	RWDD1
GO:BP,	regulation of tumor necrosis factor (ligand) superfamily member 11 production	GO:2000307	1	0	3	110	1	21128	LTF
GO:BP,	negative regulation of tumor necrosis factor (ligand) superfamily member 11 production	GO:2000308	1	0	1	110	1	21128	LTF
GO:BP,	positive regulation of cell motility	GO:2000147	1	0	557	110	7	21128	ITGB3,SELP,CORO1A,PECAM1,ITGA6,PTPRC,PTK2
GO:BP,	cellular response to chemokine	GO:1990869	1	0	99	110	3	21128	PPBP,PF4,PF4V1
GO:BP,	positive regulation of oligopeptide transport	GO:2000878	1	0	2	110	1	21128	CA2
GO:BP,	regulation of endothelial cell chemotaxis	GO:2001026	1	0	21	110	1	21128	HRG
GO:BP,	negative regulation of endothelial cell chemotaxis	GO:2001027	1	0	4	110	1	21128	HRG
GO:BP,	regulation of integrin-mediated signaling pathway	GO:2001044	1	0	21	110	1	21128	LIMS1
GO:BP,	positive regulation of integrin-mediated signaling pathway	GO:2001046	1	0	13	110	1	21128	LIMS1
GO:BP,	positive regulation of cysteine-type endopeptidase activity	GO:2001056	1	0	143	110	3	21128	VCP,S100A8,S100A9
GO:BP,	reactive nitrogen species metabolic process	GO:2001057	1	0	79	110	4	21128	HBB,MMP8,ITGB2,CD36
GO:BP,	regulation of RNA biosynthetic process	GO:2001141	1	0	3490	110	19	21128	LTF,SERPINF2,PDLIM1,S100A12,LIMS1,S100A8,PF4,ITGA6,H1-4,S100A9,ITGB2,WBP2,CD36,PITHD1,TGFB1I1,TSG101,RWDD1,ZNF578,ASH1L
GO:BP,	regulation of dipeptide transmembrane transport	GO:2001148	1	0	2	110	1	21128	CA2
GO:BP,	positive regulation of dipeptide transmembrane transport	GO:2001150	1	0	2	110	1	21128	CA2
GO:BP,	regulation of ATP biosynthetic process	GO:2001169	1	0	21	110	1	21128	VCP
GO:BP,	positive regulation of ATP biosynthetic process	GO:2001171	1	0	14	110	1	21128	VCP
GO:BP,	regulation of osteoclast development	GO:2001204	1	0	10	110	1	21128	LTF
GO:BP,	positive regulation of dipeptide transport	GO:2000880	1	0	2	110	1	21128	CA2
GO:BP,	negative regulation of osteoclast development	GO:2001205	1	0	4	110	1	21128	LTF
GO:BP,	regulation of apoptotic signaling pathway	GO:2001233	1	0	366	110	8	21128	FGB,FGG,FGA,S100A8,PF4,ITGA6,S100A9,PTPRC
GO:BP,	negative regulation of apoptotic signaling pathway	GO:2001234	1	0	231	110	5	21128	FGB,FGG,FGA,PF4,ITGA6
GO:BP,	positive regulation of apoptotic signaling pathway	GO:2001235	1	0	130	110	3	21128	S100A8,S100A9,PTPRC
GO:BP,	positive regulation of extrinsic apoptotic signaling pathway	GO:2001238	1	0	50	110	1	21128	PTPRC
GO:BP,	regulation of extrinsic apoptotic signaling pathway in absence of ligand	GO:2001239	1	0	46	110	1	21128	PF4
GO:BP,	negative regulation of extrinsic apoptotic signaling pathway in absence of ligand	GO:2001240	1	0	36	110	1	21128	PF4
GO:BP,	regulation of intrinsic apoptotic signaling pathway	GO:2001242	1	0	168	110	2	21128	S100A8,S100A9
GO:BP,	positive regulation of intrinsic apoptotic signaling pathway	GO:2001244	1	0	60	110	2	21128	S100A8,S100A9
GO:BP,	regulation of cation channel activity	GO:2001257	1	0	141	110	1	21128	STOM
GO:BP,	regulation of chloride transport	GO:2001225	1	0	8	110	1	21128	CA2
GO:BP,	mitotic cell cycle process	GO:1903047	1	0	773	110	4	21128	VCP,PTPN6,PTPA,VPS4A
GO:BP,	response to chemokine	GO:1990868	1	0	99	110	3	21128	PPBP,PF4,PF4V1
GO:BP,	adaptive thermogenesis	GO:1990845	1	0	160	110	2	21128	LCN2,CD36
GO:BP,	regulation of extracellular exosome assembly	GO:1903551	1	0	6	110	1	21128	TSG101
GO:BP,	negative regulation of tumor necrosis factor superfamily cytokine production	GO:1903556	1	0	62	110	2	21128	LTF,PTPN6
GO:BP,	positive regulation of tumor necrosis factor superfamily cytokine production	GO:1903557	1	0	105	110	4	21128	MMP8,PF4,PTPRC,CD36
GO:BP,	regulation of ATP metabolic process	GO:1903578	1	0	72	110	1	21128	VCP
GO:BP,	positive regulation of ATP metabolic process	GO:1903580	1	0	36	110	1	21128	VCP
GO:BP,	regulation of protein tyrosine phosphatase activity	GO:1903613	1	0	6	110	1	21128	PTPRC
GO:BP,	positive regulation of protein tyrosine phosphatase activity	GO:1903615	1	0	3	110	1	21128	PTPRC
GO:BP,	tarsal gland development	GO:1903699	1	0	1	110	1	21128	ASH1L
GO:BP,	regulation of hemopoiesis	GO:1903706	1	0	410	110	5	21128	LTF,PTPN6,PF4,PTPRC,PITHD1
GO:BP,	negative regulation of hemopoiesis	GO:1903707	1	0	109	110	1	21128	LTF
GO:BP,	positive regulation of hemopoiesis	GO:1903708	1	0	184	110	2	21128	PF4,PTPRC
GO:BP,	uterine gland development	GO:1903709	1	0	1	110	1	21128	ASH1L
GO:BP,	regulation of aerobic respiration	GO:1903715	1	0	30	110	1	21128	VCP
GO:BP,	regulation of plasma membrane organization	GO:1903729	1	0	19	110	1	21128	ASAP1
GO:BP,	organic acid transmembrane transport	GO:1903825	1	0	153	110	1	21128	CD36
GO:BP,	negative regulation of protein localization	GO:1903828	1	0	196	110	1	21128	CD36
GO:BP,	positive regulation of protein localization	GO:1903829	1	0	459	110	8	21128	FGB,FGG,FGA,RBP4,PECAM1,ITGB2,STOM,TSG101
GO:BP,	response to arsenite ion	GO:1903842	1	0	4	110	1	21128	VCP
GO:BP,	cellular response to arsenite ion	GO:1903843	1	0	4	110	1	21128	VCP
GO:BP,	regulation of cellular response to transforming growth factor beta stimulus	GO:1903844	1	0	141	110	1	21128	TGFB1I1
GO:BP,	positive regulation of cellular response to transforming growth factor beta stimulus	GO:1903846	1	0	31	110	1	21128	TGFB1I1
GO:BP,	regulation of dendrite extension	GO:1903859	1	0	25	110	1	21128	ITSN2
GO:BP,	positive regulation of dendrite extension	GO:1903861	1	0	22	110	1	21128	ITSN2
GO:BP,	positive regulation of exosomal secretion	GO:1903543	1	0	15	110	2	21128	TSG101,VPS4A
GO:BP,	regulation of exosomal secretion	GO:1903541	1	0	17	110	2	21128	TSG101,VPS4A
GO:BP,	regulation of protein targeting	GO:1903533	1	0	78	110	2	21128	ITGB2,STOM
GO:BP,	positive regulation of membrane tubulation	GO:1903527	1	0	4	110	1	21128	ASAP1
GO:BP,	positive regulation of proteolysis involved in protein catabolic process	GO:1903052	1	0	138	110	2	21128	VCP,PTK2
GO:BP,	regulation of extracellular matrix organization	GO:1903053	1	0	54	110	2	21128	ITGB3,CPB2
GO:BP,	positive regulation of extracellular matrix organization	GO:1903055	1	0	26	110	1	21128	CPB2
GO:BP,	regulation of protein localization to plasma membrane	GO:1903076	1	0	103	110	2	21128	STX7,VPS4A
GO:BP,	mononuclear cell differentiation	GO:1903131	1	0	474	110	2	21128	PTPN6,PTPRC
GO:BP,	regulation of calcium ion transmembrane transport	GO:1903169	1	0	185	110	3	21128	ITGB3,CORO1A,PTPN6
GO:BP,	regulation of leukocyte tethering or rolling	GO:1903236	1	0	18	110	2	21128	SELP,GP1BA
GO:BP,	positive regulation of leukocyte tethering or rolling	GO:1903238	1	0	13	110	2	21128	SELP,GP1BA
GO:BP,	regulation of regulated secretory pathway	GO:1903305	1	0	148	110	2	21128	UNC13D,ITGB2
GO:BP,	positive regulation of regulated secretory pathway	GO:1903307	1	0	52	110	2	21128	UNC13D,ITGB2
GO:BP,	regulation of protein maturation	GO:1903317	1	0	72	110	2	21128	SERPINF2,CPB2
GO:BP,	positive regulation of oxidative phosphorylation	GO:1903862	1	0	2	110	1	21128	VCP
GO:BP,	negative regulation of protein maturation	GO:1903318	1	0	29	110	2	21128	SERPINF2,CPB2
GO:BP,	positive regulation of protein modification by small protein conjugation or removal	GO:1903322	1	0	139	110	1	21128	VCP
GO:BP,	reactive oxygen species biosynthetic process	GO:1903409	1	0	56	110	2	21128	MMP8,CD36
GO:BP,	regulation of reactive oxygen species biosynthetic process	GO:1903426	1	0	43	110	2	21128	MMP8,CD36
GO:BP,	positive regulation of reactive oxygen species biosynthetic process	GO:1903428	1	0	19	110	2	21128	MMP8,CD36
GO:BP,	regulation of nucleic acid-templated transcription	GO:1903506	1	0	3467	110	19	21128	LTF,SERPINF2,PDLIM1,S100A12,LIMS1,S100A8,PF4,ITGA6,H1-4,S100A9,ITGB2,WBP2,CD36,PITHD1,TGFB1I1,TSG101,RWDD1,ZNF578,ASH1L
GO:BP,	negative regulation of nucleic acid-templated transcription	GO:1903507	1	0	1313	110	4	21128	LIMS1,H1-4,CD36,TSG101
GO:BP,	positive regulation of nucleic acid-templated transcription	GO:1903508	1	0	1703	110	9	21128	SERPINF2,PDLIM1,PF4,ITGA6,WBP2,PITHD1,TGFB1I1,TSG101,ASH1L
GO:BP,	mucopolysaccharide metabolic process	GO:1903510	1	0	97	110	1	21128	GUSB
GO:BP,	endoplasmic reticulum to cytosol transport	GO:1903513	1	0	28	110	1	21128	VCP
GO:BP,	regulation of blood circulation	GO:1903522	1	0	252	110	3	21128	FGB,FGG,FGA
GO:BP,	regulation of membrane tubulation	GO:1903525	1	0	6	110	1	21128	ASAP1
GO:BP,	regulation of protein modification by small protein conjugation or removal	GO:1903320	1	0	252	110	1	21128	VCP
GO:BP,	vacuolar localization	GO:1990849	1	0	86	110	1	21128	UNC13D
GO:BP,	regulation of viral life cycle	GO:1903900	1	0	141	110	3	21128	LTF,TSG101,VPS4A
GO:BP,	regulation of microglial cell activation	GO:1903978	1	0	18	110	2	21128	MMP8,PTPRC
GO:BP,	positive regulation of Fc-gamma receptor signaling pathway involved in phagocytosis	GO:1905451	1	0	4	110	1	21128	PTPRC
GO:BP,	regulation of protein localization to membrane	GO:1905475	1	0	175	110	4	21128	ITGB2,STX7,STOM,VPS4A
GO:BP,	positive regulation of protein localization to membrane	GO:1905477	1	0	104	110	2	21128	ITGB2,STOM
GO:BP,	macrophage migration	GO:1905517	1	0	61	110	1	21128	PTK2
GO:BP,	regulation of macrophage migration	GO:1905521	1	0	45	110	1	21128	PTK2
GO:BP,	positive regulation of macrophage migration	GO:1905523	1	0	27	110	1	21128	PTK2
GO:BP,	negative regulation of low-density lipoprotein receptor activity	GO:1905598	1	0	5	110	1	21128	ITGB3
GO:BP,	regulation of protein localization to chromatin	GO:1905634	1	0	11	110	1	21128	VCP
GO:BP,	epididymis development	GO:1905867	1	0	4	110	1	21128	PTPN6
GO:BP,	regulation of response to endoplasmic reticulum stress	GO:1905897	1	0	82	110	1	21128	MANF
GO:BP,	regulation of lipid localization	GO:1905952	1	0	165	110	2	21128	ITGB3,CD36
GO:BP,	negative regulation of lipid localization	GO:1905953	1	0	46	110	1	21128	ITGB3
GO:BP,	positive regulation of lipid localization	GO:1905954	1	0	109	110	1	21128	CD36
GO:BP,	amyloid fibril formation	GO:1990000	1	0	39	110	1	21128	CD36
GO:BP,	response to nerve growth factor	GO:1990089	1	0	47	110	1	21128	CORO1A
GO:BP,	cellular response to nerve growth factor stimulus	GO:1990090	1	0	45	110	1	21128	CORO1A
GO:BP,	neuron projection extension	GO:1990138	1	0	175	110	1	21128	ITSN2
GO:BP,	exosomal secretion	GO:1990182	1	0	20	110	2	21128	TSG101,VPS4A
GO:BP,	cellular response to insulin-like growth factor stimulus	GO:1990314	1	0	9	110	1	21128	ITGB3
GO:BP,	lipid transport across blood-brain barrier	GO:1990379	1	0	6	110	1	21128	CD36
GO:BP,	embryonic liver development	GO:1990402	1	0	3	110	1	21128	A2M
GO:BP,	response to angiotensin	GO:1990776	1	0	31	110	1	21128	CA2
GO:BP,	protein localization to cell periphery	GO:1990778	1	0	338	110	2	21128	STX7,VPS4A
GO:BP,	regulation of Fc-gamma receptor signaling pathway involved in phagocytosis	GO:1905449	1	0	6	110	1	21128	PTPRC
GO:BP,	protein localization to presynapse	GO:1905383	1	0	10	110	1	21128	RAB27B
GO:BP,	positive regulation of membrane invagination	GO:1905155	1	0	14	110	1	21128	CD36
GO:BP,	regulation of membrane invagination	GO:1905153	1	0	16	110	1	21128	CD36
GO:BP,	negative regulation of microglial cell activation	GO:1903979	1	0	8	110	1	21128	PTPRC
GO:BP,	positive regulation of microglial cell activation	GO:1903980	1	0	8	110	1	21128	MMP8
GO:BP,	positive regulation of vasculature development	GO:1904018	1	0	165	110	2	21128	ITGB3,ITGB2
GO:BP,	epithelial cell apoptotic process	GO:1904019	1	0	134	110	3	21128	FGB,FGG,FGA
GO:BP,	regulation of epithelial cell apoptotic process	GO:1904035	1	0	106	110	3	21128	FGB,FGG,FGA
GO:BP,	negative regulation of epithelial cell apoptotic process	GO:1904036	1	0	59	110	3	21128	FGB,FGG,FGA
GO:BP,	regulation of monoatomic cation transmembrane transport	GO:1904062	1	0	329	110	4	21128	ITGB3,CORO1A,PTPN6,STOM
GO:BP,	DN2 thymocyte differentiation	GO:1904155	1	0	4	110	1	21128	PTPRC
GO:BP,	regulation of protein localization to cell periphery	GO:1904375	1	0	125	110	2	21128	STX7,VPS4A
GO:BP,	cellular response to angiotensin	GO:1904385	1	0	27	110	1	21128	CA2
GO:BP,	response to amyloid-beta	GO:1904645	1	0	48	110	1	21128	CD36
GO:BP,	positive regulation of viral life cycle	GO:1903902	1	0	25	110	2	21128	TSG101,VPS4A
GO:BP,	cellular response to amyloid-beta	GO:1904646	1	0	39	110	1	21128	CD36
GO:BP,	regulation of receptor signaling pathway via STAT	GO:1904892	1	0	108	110	1	21128	PTPRC
GO:BP,	ESCRT complex disassembly	GO:1904896	1	0	10	110	1	21128	VPS4A
GO:BP,	ESCRT III complex disassembly	GO:1904903	1	0	10	110	1	21128	VPS4A
GO:BP,	negative regulation of establishment of protein localization	GO:1904950	1	0	122	110	1	21128	CD36
GO:BP,	positive regulation of establishment of protein localization	GO:1904951	1	0	315	110	7	21128	FGB,FGG,FGA,RBP4,ITGB2,STOM,TSG101
GO:BP,	regulation of leukocyte adhesion to vascular endothelial cell	GO:1904994	1	0	31	110	3	21128	SELP,GP1BA,ITGB2
GO:BP,	autophagosome organization	GO:1905037	1	0	117	110	1	21128	PIK3C3
GO:BP,	carboxylic acid transmembrane transport	GO:1905039	1	0	152	110	1	21128	CD36
GO:BP,	cell surface receptor signaling pathway involved in cell-cell signaling	GO:1905114	1	0	576	110	2	21128	VCP,TGFB1I1
GO:BP,	response to acetylcholine	GO:1905144	1	0	34	110	1	21128	RGS10
GO:BP,	cellular response to acetylcholine	GO:1905145	1	0	31	110	1	21128	RGS10
GO:BP,	glucose transmembrane transport	GO:1904659	1	0	109	110	1	21128	PPBP
GO:BP,	regulation of protein localization to cell-cell junction	GO:0150106	1	0	3	110	1	21128	PECAM1
GO:BP,	endothelial cell migration	GO:0043542	1	0	218	110	4	21128	HRG,ITGB3,ITGB2,PTK2
GO:BP,	cell-cell junction organization	GO:0045216	1	0	204	110	2	21128	LIMS1,PECAM1
GO:BP,	regulation of adaptive immune response based on somatic recombination of immune receptors built from immunoglobulin superfamily domains	GO:0002822	1	0	176	110	5	21128	C4BPA,PTPN6,STX7,PTPRC,C4BPB
[truncated: 1,395 more rows]

## Sheet: LPRF GO-MF
LPRF-CM	GO MF CATEGORIES WITH P<0.05
[truncated: 38 more rows]

[truncated: 4 more sheets: BMSC CM ALL, BMSC REACTOME, BMSC GO-BP, BMSC GO-MF]
