# Supplementary material for: Proteomic analysis of mesenchymal stromal cells secretome in comparison to leukocyte- and platelet-rich fibrin
Source: Research Square preprint supplement (doi:10.21203/rs.3.rs-2917479/v1), 2023-05-17
Supplement: Supplementary file 5 [file a6b2e0f4917a2ee2dc362a77.xlsx]

## Sheet: MS data
BMSC-CM: Donor 1	BMSC-CM: Donor 2	BMSC-CM: Donor 3	PRF-CM: Donor 1	PRF-CM: Donor 2	PRF-CM: Donor 3	C: Contaminant	C: Modifications	N: Proteins Unique Sequence ID	N: Checked	N: Protein FDR Confidence: Combined	N: Master	N: Exp. q-value: Combined	N: Sum PEP Score	N: Coverage [%]	N: # Peptides	N: # PSMs	N: # Unique Peptides	N: # AAs	N: MW [kDa]	N: calc. pI	N: Score MS Amanda 2.0: MS Amanda 2.0	N: Score Sequest HT: Sequest HT	N: # Peptides (by Search Engine): MS Amanda 2.0	N: # Peptides (by Search Engine): Sequest HT	T: Accession	T: Description	T: # Razor Peptides	T: Pfam IDs	T: Entrez Gene ID	T: Ensembl Gene ID	T: Gene Symbol	T: Gene ID
6791740000	1532980000	9573000000	2363090000	1495190000	351615000	FALSE		3,27E+18	NaN	NaN	NaN	0	2397,8	72	151	6152	151	2477	272,2	5,5	452994	12672,4	79	151	P02751	Fibronectin OS=Homo sapiens OX=9606 GN=FN1 PE=1 SV=5	0	Pf00039, Pf00040, Pf00041	2335	ENSG00000115414	FN1	B7ZLF0;E9PE77;E9PG29;hsa:2335;O95609;O95610;P02751;Q14312;Q14325;Q14326;Q17RV7;Q53S27;Q564H7;Q585T2;Q59EH1;Q60FE4;Q68DP8;Q68DP9;Q68DT4;Q6LDP6;Q6MZS0;Q6MZU5;Q6N025;Q6N0A6;Q7Z391;Q86T27;Q8IVI8;Q96KP7;Q96KP8;Q96KP9;Q9H1B8;Q9HAP3;Q9UMK2
677278000	484533000	943701000	2552510000	1935490000	700789000	FALSE	Met-loss+Acetyl [N-Term]	-4,57E+18	NaN	NaN	NaN	0	2222,04	80	196	3435	181	2647	280,6	6,06	351741	6421,6	126	196	P21333	Filamin-A OS=Homo sapiens OX=9606 GN=FLNA PE=1 SV=4	14	Pf00307, Pf00630	2316	ENSG00000196924	FLNA	E9KL45;hsa:2316;P21333;Q5HY53;Q5HY55;Q8NF52
1393930000	734868000	2329680000	6193800	10108800	10351400	FALSE		-3,2E+18	NaN	NaN	NaN	0	2141,71	73	219	2466	219	3177	343,5	6,68	251586	4314,74	155	219	P12111	Collagen alpha-3(VI) chain OS=Homo sapiens OX=9606 GN=COL6A3 PE=1 SV=5	0	Pf00014, Pf00092, Pf01391	1293	ENSG00000163359	COL6A3	A8MT30;B4E3U5;B7ZMJ7;E9PFQ6;E9PGQ9;hsa:1293;P12111;Q16501;Q53QF4;Q53QF6
12843700000	2041130000	20398800000	19088500	42235600	112799000	FALSE		2,73E+18	NaN	NaN	NaN	0	2036,21	92	113	6419	113	1366	129,2	8,95	524074	14513,8	55	113	P08123	Collagen alpha-2(I) chain OS=Homo sapiens OX=9606 GN=COL1A2 PE=1 SV=7	0	Pf01391, Pf01410	1278	ENSG00000164692	COL1A2	hsa:1278;P02464;P08123;Q13897;Q13997;Q13998;Q14038;Q14057;Q15177;Q15947;Q16480;Q16511;Q7Z5S6;Q9UEB6;Q9UEF9;Q9UM83;Q9UMI1;Q9UML5;Q9UMM6;Q9UPH0
76018600	16743500	193743000	1201390000	1078000000	34211800	FALSE		8,72E+18	NaN	NaN	NaN	0	1988,08	62	244	2647	244	4563	515,3	7,05	275787	3687,38	204	242	P04114	Apolipoprotein B-100 OS=Homo sapiens OX=9606 GN=APOB PE=1 SV=2	0	Pf01347, Pf06448, Pf09172, Pf12491	338	ENSG00000084674	APOB	hsa:338;O00502;P04114;P78479;P78480;P78481;Q13779;Q13785;Q13786;Q13787;Q13788;Q4ZG63;Q53QC8;Q7Z600;Q9UMN0
8720710000	3051430000	17064000000	84976100	111694000	17811900	FALSE		1,08E+18	NaN	NaN	NaN	0	1956,55	91	116	4580	113	1464	138,8	5,8	433475	8794,05	59	116	P02452	Collagen alpha-1(I) chain OS=Homo sapiens OX=9606 GN=COL1A1 PE=1 SV=6	3	Pf00093, Pf01391, Pf01410	1277	ENSG00000108821	COL1A1	hsa:1277;O76045;P02452;P78441;Q13896;Q13902;Q13903;Q14037;Q14992;Q15176;Q15201;Q16050;Q59F64;Q7KZ30;Q7KZ34;Q8IVI5;Q8N473;Q9UML6;Q9UMM7
1703130000	1135060000	2470090000	2139510	2728340	4820580	FALSE		4,96E+18	NaN	NaN	NaN	0	1787,92	69	191	2689	191	3063	332,9	5,53	257060	4501,18	135	190	Q99715	Collagen alpha-1(XII) chain OS=Homo sapiens OX=9606 GN=COL12A1 PE=1 SV=2	0	Pf00041, Pf00092, Pf01391	1303	ENSG00000111799	COL12A1	hsa:1303;O43853;Q15955;Q5VYK1;Q5VYK2;Q71UR3;Q99715;Q99716
550850000	561861000	626046000	2239290000	3556920000	451346000	FALSE		-3,72E+18	NaN	NaN	NaN	0	1725,2	89	166	4512	156	1663	187	6,4	469090	6858,15	121	166	P01024	Complement C3 OS=Homo sapiens OX=9606 GN=C3 PE=1 SV=2	10	Pf00207, Pf01759, Pf01821, Pf01835, Pf07677, Pf07678, Pf07703, Pf17789, Pf17790, Pf17791	718	ENSG00000125730	C3	A7E236;hsa:718;P01024
10327600000	16331500000	11991200000	40450000000	58762200000	13187200000	TRUE		-7,06E+18	NaN	NaN	NaN	0	1694,5	95	115	19224	109	609	69,3	6,28	1937150	34536,5	80	115	P02768	Albumin OS=Homo sapiens OX=9606 GN=ALB PE=1 SV=2	6	Pf00273	213	ENSG00000163631	ALB	E7ESS9;hsa:213;O95574;P02768;P04277;Q13140;Q645G4;Q68DN5;Q6UXK4;Q86YG0;Q8IUK7;Q9P157;Q9P1I7;Q9UHS3;Q9UJZ0
238308000	187869000	246531000	1043850000	688076000	168425000	FALSE		-4,62E+18	NaN	NaN	NaN	0	1569,53	77	170	2272	154	2541	269,6	6,07	237865	4094,54	113	170	Q9Y490	Talin-1 OS=Homo sapiens OX=9606 GN=TLN1 PE=1 SV=3	15	Pf00373, Pf01608, Pf08913, Pf09141, Pf16511	7094	ENSG00000137076	TLN1	A6NMY0;hsa:7094;Q86YD0;Q9NZQ2;Q9UHH8;Q9UPX3;Q9Y490
215345000	103704000	294441000	27916000	33117800	2529880	FALSE		-8,8E+17	NaN	NaN	NaN	0	1543,57	70	254	1385	254	5890	628,7	6,15	148345	1815,21	208	254	Q09666	Neuroblast differentiation-associated protein AHNAK OS=Homo sapiens OX=9606 GN=AHNAK PE=1 SV=2	0		79026	ENSG00000124942	AHNAK	A1A586;hsa:79026;Q09666
301442000	190805000	366664000	875171000	624277000	352002000	FALSE		2,96E+18	NaN	NaN	NaN	0	1532,87	69	169	2540	143	1960	226,4	5,6	306786	4060,34	136	169	P35579	Myosin-9 OS=Homo sapiens OX=9606 GN=MYH9 PE=1 SV=4	25	Pf00063, Pf01576, Pf02736	4627	ENSG00000100345	MYH9	A8K6E4;hsa:4627;O60805;P35579;Q60FE2;Q86T83
250972000	197493000	286991000	2869790000	5370410000	602914000	FALSE		-6,32E+17	NaN	NaN	NaN	0	1450,55	75	115	3210	101	1474	163,2	6,46	336369	4884,35	74	115	P01023	Alpha-2-macroglobulin OS=Homo sapiens OX=9606 GN=A2M PE=1 SV=3	15	Pf00207, Pf01835, Pf07677, Pf07678, Pf07703, Pf17789, Pf17791	2	ENSG00000175899	A2M	hsa:2;P01023;Q13677;Q59F47;Q5QTS0;Q68DN2;Q6PIY3;Q6PN97
415516000	294182000	438946000	14860500000	13785500000	14410700000	FALSE		-1,31E+18	NaN	NaN	NaN	0	1328,71	82	67	9020	56	491	55,9	8,27	944635	14098,5	42	67	P02675	Fibrinogen beta chain OS=Homo sapiens OX=9606 GN=FGB PE=1 SV=2	11	Pf00147, Pf08702	2244	ENSG00000171564	FGB	A0JLR9;B2R7G3;hsa:2244;P02675;Q32Q65;Q3KPF2
13190600	7965780	18390200	330627000	276516000	109502000	FALSE		2,76E+18	NaN	NaN	NaN	0	1248,71	60	137	1201	137	2813	309,1	5,48	119966	2161,18	95	137	P04275	von Willebrand factor OS=Homo sapiens OX=9606 GN=VWF PE=1 SV=4	0	Pf00092, Pf00093, Pf00094, Pf01826, Pf08742, Pf16164	7450	ENSG00000110799	VWF	hsa:7450;P04275;Q8TCE8;Q99806
507779000	376525000	873004000	3011570	5269160	2348740	FALSE		-3,47E+18	NaN	NaN	NaN	0	1200,36	53	112	1148	110	2871	312,1	4,93	117654	2209,65	79	112	P35555	Fibrillin-1 OS=Homo sapiens OX=9606 GN=FBN1 PE=1 SV=4	2	Pf00683, Pf07645, Pf12662, Pf12947, Pf14670, Pf18193	2200	ENSG00000166147	FBN1	B2RUU0;D2JYH6;hsa:2200;P35555;Q15972;Q75N87
1436790000	437946000	2036410000	3037540000	3030980000	250984000	FALSE		-7,63E+18	NaN	NaN	NaN	0	1175,67	77	97	3232	94	1170	129,3	4,94	305163	5910,56	65	97	P07996	Thrombospondin-1 OS=Homo sapiens OX=9606 GN=THBS1 PE=1 SV=2	4	Pf00090, Pf00093, Pf02412, Pf05735	7057	ENSG00000137801	THBS1	A8K6H4;B4E3J7;B9EGH6;hsa:7057;P07996;Q15667;Q59E99
1185860000	1820380000	1474540000	2826810000	5439300000	582382000	FALSE		3,23E+18	NaN	NaN	NaN	0	1144,64	87	81	3398	80	698	77	7,12	283736	5951,37	61	81	P02787	Serotransferrin OS=Homo sapiens OX=9606 GN=TF PE=1 SV=3	1	Pf00405	7018	ENSG00000091513	TF	hsa:7018;O43890;P02787;Q1HBA5;Q9NQB8;Q9UHV0
154888000	78023600	147860000	40626600	12562900	3065000	FALSE		-3,24E+18	NaN	NaN	NaN	0	1105,64	46	180	1115	179	4684	531,5	5,96	125972	1530,56	150	179	Q15149	Plectin OS=Homo sapiens OX=9606 GN=PLEC PE=1 SV=3	1	Pf00307, Pf00681, Pf03501, Pf17902, Pf18373	5339	ENSG00000178209	PLEC	hsa:5339;Q15148;Q15149;Q16640;Q6S376;Q6S377;Q6S378;Q6S379;Q6S380;Q6S381;Q6S382;Q6S383
740335000	313289000	2058420000	80398600	62533900	872704	FALSE		-5,58E+18	NaN	NaN	NaN	0	1087,1	74	85	1001	63	1466	138,5	6,61	89400,5	2098,23	46	85	P02461	Collagen alpha-1(III) chain OS=Homo sapiens OX=9606 GN=COL3A1 PE=1 SV=4	26	Pf00093, Pf01391, Pf01410	1281	ENSG00000168542	COL3A1	D2JYH5;D3DPH4;hsa:1281;P02461;P78429;Q15112;Q16403;Q53S91;Q541P8;Q6LDB3;Q6LDJ2;Q6LDJ3;Q7KZ56;Q8N6U4;Q9UC88;Q9UC89;Q9UC90;Q9UC91;R4N3C5;V9GZI1
513366000	301927000	545041000	15844100000	16201200000	11391900000	FALSE		2,87E+18	NaN	NaN	NaN	0	1015,64	92	63	8366	63	453	51,5	5,62	647488	14975,6	33	63	P02679	Fibrinogen gamma chain OS=Homo sapiens OX=9606 GN=FGG PE=1 SV=3	0	Pf00147, Pf08702	2266	ENSG00000171557	FGG	A8K057;hsa:2266;P02679;P04469;P04470;Q53Y18;Q96A14;Q96KJ3;Q9UC62;Q9UC63;Q9UCF3
1221970000	867933000	1093310000	2005220	3893150	1408130	FALSE		-8,7E+18	NaN	NaN	NaN	0	934,411	80	87	1274	87	836	93,3	7,53	137259	2061,6	61	87	Q15063	Periostin OS=Homo sapiens OX=9606 GN=POSTN PE=1 SV=2	0	Pf02469	10631	ENSG00000133110	POSTN	B1ALD8;C0IMJ1;C0IMJ2;C0IMJ4;D2KRH7;F5H628;hsa:10631;Q15063;Q15064;Q29XZ0;Q3KPJ5;Q5VSY5;Q8IZF9
386935000	306043000	421529000	9812750000	12790800000	7862580000	FALSE		-3E+18	NaN	NaN	NaN	0	911,414	60	79	4452	79	866	94,9	6,01	464282	6346,26	53	79	P02671	Fibrinogen alpha chain OS=Homo sapiens OX=9606 GN=FGA PE=1 SV=2	0	Pf00147, Pf08702, Pf12160	2243	ENSG00000171560	FGA	A8K3E4;D3DP14;D3DP15;hsa:2243;P02671;Q4QQH7;Q9BX62;Q9UCH2
2701650000	1101110000	3638550000	4677430	19170600	26415400	FALSE		8,66E+18	NaN	NaN	NaN	0	910,396	73	66	2169	66	1028	108,5	5,43	166780	4149,07	38	66	P12109	Collagen alpha-1(VI) chain OS=Homo sapiens OX=9606 GN=COL6A1 PE=1 SV=3	0	Pf00092, Pf01391	1291	ENSG00000142156	COL6A1	hsa:1291;O00117;O00118;P12109;Q14040;Q14041;Q16258;Q7Z645;Q9BSA8
59374100	23069300	61442300	329570000	507426000	20552300	FALSE		7,14E+18	NaN	NaN	NaN	0	871,375	70	96	1112	4	1744	192,6	7,27	114529	1836,99	65	96	P0C0L5	Complement C4-B OS=Homo sapiens OX=9606 GN=C4B_2 PE=1 SV=2	93	Pf00207, Pf01759, Pf01821, Pf01835, Pf07677, Pf07678, Pf07703, Pf17789, Pf17791	100293534;721	ENSG00000224389;ENSG00000228267;ENSG00000228454;ENSG00000233312;ENSG00000236625	C4B;C4B_2	A2BHY4;hsa:100293534;hsa:721;P01028;P0C0L5;P78445;Q13160;Q13906;Q14033;Q14835;Q6U2E9;Q6U2G1;Q6U2I5;Q6U2L1;Q6U2L7;Q6U2L9;Q6U2M5;Q6VCV8;Q96SA7;Q9NPK5;Q9UIP5
185077000	95581500	224906000	459641000	247306000	182203000	FALSE	Acetyl [N-Term]	-1,52E+18	NaN	NaN	NaN	0	867,251	89	82	2043	57	892	103	5,41	222879	3092,57	62	82	P12814	Alpha-actinin-1 OS=Homo sapiens OX=9606 GN=ACTN1 PE=1 SV=2	0	Pf00307, Pf00435, Pf08726	87	ENSG00000072110	ACTN1	B3V8S3;B4DHH3;B7TY16;hsa:87;P12814;Q1HE25;Q9BTN1
546164000	205006000	1002250000	2374370	2591290	263635	FALSE		-1,61E+18	NaN	NaN	NaN	0	866,781	70	70	787	69	1499	144,8	6,46	72422,4	1709,32	36	70	P05997	Collagen alpha-2(V) chain OS=Homo sapiens OX=9606 GN=COL5A2 PE=1 SV=3	1	Pf00093, Pf01391, Pf01410	1290	ENSG00000204262	COL5A2	hsa:1290;P05997;P78440;Q13908;Q53WR4;Q59GR4;Q6LDJ5;Q7KZ55;Q86XF6;Q96QB0;Q96QB3
1379950	1068340	1109450	13884100	24610600	3195120	FALSE		4,74E+18	NaN	NaN	NaN	0	835,638	70	95	1089	3	1744	192,7	7,08	111505	1785,72	64	95	P0C0L4	Complement C4-A OS=Homo sapiens OX=9606 GN=C4A PE=1 SV=2	0	Pf00207, Pf01759, Pf01821, Pf01835, Pf07677, Pf07678, Pf07703, Pf17789, Pf17791	720;721	ENSG00000206340;ENSG00000227746;ENSG00000244731	C4A	A6H8M8;A6NHJ5;A7E2V2;B0QZR6;B0V2C8;B2RUT6;B7ZVZ6;hsa:720;hsa:721;P01028;P0C0L4;P78445;Q13160;Q13906;Q14033;Q14835;Q4LE82;Q5JNX2;Q5JQM8;Q6P4R1;Q6U2E5;Q6U2E8;Q6U2F0;Q6U2F3;Q6U2F4;Q6U2F6;Q6U2F8;Q6U2G0;Q96EG2;Q96SA8;Q9NPK5;Q9UIP5
352129000	136865000	393120000	310647000	157766000	120788000	FALSE		3,45E+18	NaN	NaN	NaN	0	826,553	83	82	1539	57	911	104,8	5,44	180361	2445,76	67	82	O43707	Alpha-actinin-4 OS=Homo sapiens OX=9606 GN=ACTN4 PE=1 SV=2	26	Pf00307, Pf00435, Pf08726	81	ENSG00000130402;ENSG00000282844	ACTN4	A4K467;D6PXK4;hsa:81;O43707;O76048
65693600	30497200	82585700	32356500	17537500	4842200	FALSE		-6,68E+16	NaN	NaN	NaN	0	808,235	60	124	846	124	2472	284,4	5,35	87308,1	1320,85	95	123	Q13813	Spectrin alpha chain, non-erythrocytic 1 OS=Homo sapiens OX=9606 GN=SPTAN1 PE=1 SV=3	0	Pf00018, Pf00435, Pf08726, Pf13499	6709	ENSG00000197694	SPTAN1	hsa:6709;Q13186;Q13813;Q15324;Q16606;Q59EF1;Q5VXV5;Q5VXV6;Q7Z6M5;Q9P0V0
436294000	213209000	1179240000	93273700	47804600	51921300	FALSE		-1,92E+18	NaN	NaN	NaN	0	780,514	61	72	938	66	1838	183,4	5,06	69188,7	1558,55	36	72	P20908	Collagen alpha-1(V) chain OS=Homo sapiens OX=9606 GN=COL5A1 PE=1 SV=3	8	Pf01391, Pf01410	1289	ENSG00000130635	COL5A1	A0A087WXW9;hsa:1289;P20908;Q15094;Q5SUX4
101107000	91869000	130725000	573398000	856297000	140875000	FALSE		1,12E+18	NaN	NaN	NaN	0	780,363	76	65	1063	60	810	90,5	7,24	94886,2	2086,07	43	65	P00747	Plasminogen OS=Homo sapiens OX=9606 GN=PLG PE=1 SV=2	7	Pf00024, Pf00051, Pf00089	5340	ENSG00000122194	PLG	hsa:5340;P00747;Q15146;Q5TEH4;Q6PA00
742119000	1878860000	1154550000	34326000	196955000	13962900	TRUE		-7,48E+18	NaN	NaN	NaN	0	770,036	84	70	2701	64	607	69,2	6,18	285955	3475,29	57	70	P02769	SWISS-PROT:P02769 (Bos taurus) Bovine serum albumin precursor	0	Pf00273	280717		ALB	A5PJX3;bta:280717;O02787;P02769;P04277;Q3SZR2
138847000	56411500	171359000	588337000	677674000	57091600	FALSE		4,61E+18	NaN	NaN	NaN	0	765,194	70	81	1304	72	1231	139	6,61	147539	1888,84	66	81	P08603	Complement factor H OS=Homo sapiens OX=9606 GN=CFH PE=1 SV=4	9	Pf00084	3075	ENSG00000000971	CFH	A5PL14;hsa:3075;P08603;P78435;Q14570;Q2TAZ5;Q38G77;Q5TFM3;Q8N708;Q9NU86
66098700	37145600	63752100	1659220	2137960	128389	FALSE	Met-loss+Acetyl [N-Term]	-6,02E+18	NaN	NaN	NaN	0	739,958	53	93	451	93	2468	270,5	4,81	48588,3	861,1	60	93	P46821	Microtubule-associated protein 1B OS=Homo sapiens OX=9606 GN=MAP1B PE=1 SV=2	0	Pf00414	4131	ENSG00000131711	MAP1B	A2BDK5;hsa:4131;P46821
76522900	47013200	77058700	245044000	512646000	20743300	FALSE		-3,78E+18	NaN	NaN	NaN	0	683,044	71	58	911	58	1065	122,1	5,72	83852,1	1863,71	34	58	P00450	Ceruloplasmin OS=Homo sapiens OX=9606 GN=CP PE=1 SV=1	0	Pf00394, Pf07731, Pf07732	1356	ENSG00000047457	CP	hsa:1356;P00450;Q14063;Q2PP18;Q9UKS4
226078000	98571100	232759000	381109000	248758000	225680000	FALSE	Met-loss [N-Term]	-7,02E+18	NaN	NaN	NaN	0	677,579	71	84	1205	84	1134	123,7	5,66	114831	2017,65	61	84	P18206	Vinculin OS=Homo sapiens OX=9606 GN=VCL PE=1 SV=4	0	Pf01044	7414	ENSG00000035403	VCL	hsa:7414;P18206;Q16450;Q5SWX2;Q7Z3B8;Q8IXU7
112204000	64806300	184642000	1668170	2656550	298503	FALSE		-9,14E+18	NaN	NaN	NaN	0	676,423	51	75	519	75	1823	202,4	6,28	49088,9	936,06	49	75	Q16363	Laminin subunit alpha-4 OS=Homo sapiens OX=9606 GN=LAMA4 PE=1 SV=4	0	Pf00053, Pf02210, Pf06008, Pf06009	3910	ENSG00000112769	LAMA4	hsa:3910;Q14731;Q14735;Q15335;Q16363;Q4LE44;Q5SZG8;Q9BTB8;Q9UE18;Q9UJN9
704823000	340106000	1065070000	18814300	8548150	8115560	FALSE		-4,22E+18	NaN	NaN	NaN	0	668,636	61	61	823	58	1172	129,9	4,83	102346	1579,97	44	61	P35442	Thrombospondin-2 OS=Homo sapiens OX=9606 GN=THBS2 PE=1 SV=2	0	Pf00090, Pf00093, Pf02412, Pf05735, Pf07645, Pf12947	7058	ENSG00000186340	THBS2	A6H8N1;A7E232;hsa:7058;P35442;Q5RI52
447830000	241727000	548420000	51991600	34514200	3895370	FALSE	Met-loss+Acetyl [N-Term]	6,49E+18	NaN	NaN	NaN	0	659,781	82	49	876	49	531	57,9	7,84	80904,7	1683,2	28	49	P14618	Pyruvate kinase PKM OS=Homo sapiens OX=9606 GN=PKM PE=1 SV=4	0	Pf00224, Pf02887	5315	ENSG00000067225	PKM	A6NFK3;B2R5N8;B3KRY0;B4DFX8;B4DUU6;hsa:5315;P14618;P14786;Q53GK4;Q96E76;Q9BWB5;Q9UCV6;Q9UPF2
29941800	31153100	46950200	3839450	3007570	813971	FALSE		3,65E+18	NaN	NaN	NaN	0	658,865	53	90	529	78	2602	278	5,73	49379,2	880,54	58	90	O75369	Filamin-B OS=Homo sapiens OX=9606 GN=FLNB PE=1 SV=2	3	Pf00307, Pf00630	2317	ENSG00000136068	FLNB	B2ZZ83;B2ZZ84;B2ZZ85;C9JKE6;C9JMC4;hsa:2317;O75369;Q13706;Q59EC2;Q60FE7;Q6MZJ1;Q8WXS9;Q8WXT0;Q8WXT1;Q8WXT2;Q8WXT3;Q9NRB5;Q9NT26;Q9UEV9
46242100	26437700	67778900	914373	1292470	581651	FALSE		3,07E+18	NaN	NaN	NaN	0	643,694	29	91	467	91	4544	504,3	5,39	50340,2	791,48	66	91	Q07954	Prolow-density lipoprotein receptor-related protein 1 OS=Homo sapiens OX=9606 GN=LRP1 PE=1 SV=2	0	Pf00057, Pf00058, Pf07645, Pf12662, Pf14670, Pf16472	4035	ENSG00000123384	LRP1	hsa:4035;Q07954;Q2PP12;Q86SW0;Q8IVG8
129880000	95250800	234659000	2419310	3420030	753018	FALSE		-1,83E+18	NaN	NaN	NaN	0	640,642	57	71	572	71	1609	177,5	5,12	59458,7	896,38	52	71	P11047	Laminin subunit gamma-1 OS=Homo sapiens OX=9606 GN=LAMC1 PE=1 SV=3	0	Pf00052, Pf00053, Pf00055	3915	ENSG00000135862	LAMC1	hsa:3915;P11047;Q5VYE7
86590000	44559700	206236000	1171990	719060	1263400	FALSE		1,2E+17	NaN	NaN	NaN	0	634,42	65	70	478	70	1479	165,2	7,17	43767,3	930,05	47	69	Q92626	Peroxidasin homolog OS=Homo sapiens OX=9606 GN=PXDN PE=1 SV=2	0	Pf00093, Pf03098, Pf07679, Pf13855	7837	ENSG00000130508	PXDN	A8QM65;D6W4Y0;hsa:7837;Q4KMG2;Q92626
1031830000	495899000	1804350000	844656	4262960	4975520	FALSE		3,61E+18	NaN	NaN	NaN	0	609,084	85	53	1453	53	660	73,8	5,47	136820	1916,52	39	53	P08253	72 kDa type IV collagenase OS=Homo sapiens OX=9606 GN=MMP2 PE=1 SV=2	0	Pf00040, Pf00045, Pf00413, Pf01471	4313	ENSG00000087245	MMP2	B2R6U1;B4DWH3;E9PE45;hsa:4313;P08253;Q9UCJ8
173799000	187039000	247668000	159473000	128175000	77605300	FALSE		6,76E+17	NaN	NaN	NaN	0	591,706	44	58	718	57	1721	186,7	5,96	76662,2	1326,34	40	58	Q14766	Latent-transforming growth factor beta-binding protein 1 OS=Homo sapiens OX=9606 GN=LTBP1 PE=1 SV=4	1	Pf00683, Pf07645, Pf12662	4052	ENSG00000049323	LTBP1	A1L3V1;hsa:4052;P22064;Q14766;Q53SD8;Q53SF3;Q53SG1;Q59HF7;Q8TD95
139632000	117495000	226185000	11746400	6836430	12079800	FALSE		-5,01E+18	NaN	NaN	NaN	0	576,229	51	73	568	73	1786	197,9	4,94	55867,3	943,28	52	72	P07942	Laminin subunit beta-1 OS=Homo sapiens OX=9606 GN=LAMB1 PE=1 SV=2	0	Pf00053, Pf00055	3912	ENSG00000091136	LAMB1	hsa:3912;P07942;Q14D91
310737000	705029000	423910000	2087830000	1970970000	203772000	FALSE		-4,65E+18	NaN	NaN	NaN	0	571,964	70	40	1337	23	406	45,2	6,58	178651	2437,23	30	40	P00738	Haptoglobin OS=Homo sapiens OX=9606 GN=HP PE=1 SV=1	18	Pf00089	3240	ENSG00000257017	HP	B0AZL5;hsa:3240;P00737;P00738;Q0VAC4;Q0VAC5;Q2PP15;Q3B7J0;Q6LBY9;Q9UC67
51963500	51014200	141362000	7584720	6849440	984543	FALSE		-3,75E+18	NaN	NaN	NaN	0	566,763	48	66	370	66	2201	240,7	4,89	38717,5	734,68	37	66	P24821	Tenascin OS=Homo sapiens OX=9606 GN=TNC PE=1 SV=3	0	Pf00041, Pf00147, Pf07974, Pf18720	3371	ENSG00000041982	TNC	C9IYT7;C9J575;C9J6D9;C9J848;hsa:3371;P24821;Q14583;Q15567;Q5T7S3
780788000	173339000	1263060000	1132710	2758460	4954870	FALSE		-7,27E+18	NaN	NaN	NaN	0	564,892	53	53	912	53	1019	108,5	6,21	84194,7	1657,14	36	53	P12110	Collagen alpha-2(VI) chain OS=Homo sapiens OX=9606 GN=COL6A2 PE=1 SV=4	0	Pf00092, Pf01391	1292	ENSG00000142173	COL6A2	hsa:1292;P12110;Q13909;Q13910;Q13911;Q14048;Q14049;Q16259;Q16597;Q6P0Q1;Q9UML3;Q9Y4S8
2421910000	574548000	2121670000	137049000	88815200	19393900	FALSE		-7,12E+18	NaN	NaN	NaN	0	550,699	89	56	1470	52	466	53,6	5,12	167780	2120,91	46	56	P08670	Vimentin OS=Homo sapiens OX=9606 GN=VIM PE=1 SV=4	4	Pf00038, Pf04732	7431	ENSG00000026025	VIM	B0YJC2;D3DRU4;hsa:7431;P08670;Q15867;Q15868;Q15869;Q548L2;Q6LER9;Q8N850;Q96ML2;Q9NTM3
62694900	108223000	128638000	6508500	3553640	1645810	FALSE	Met-loss [N-Term]	3,82E+18	NaN	NaN	NaN	0	544,855	74	69	479	69	858	95,3	6,83	47938,4	677,57	51	66	P13639	Elongation factor 2 OS=Homo sapiens OX=9606 GN=EEF2 PE=1 SV=4	0	Pf00009, Pf00679, Pf03144, Pf03764, Pf14492	1938	ENSG00000167658	EEF2	B2RMP5;D6W618;hsa:1938;P13639;Q58J86
159044000	146999000	143872000	216732000	96589100	79330200	FALSE	Acetyl [N-Term]	-2,16E+18	NaN	NaN	NaN	0	542,318	80	47	707	47	623	67,8	7,66	59168,4	1396,97	31	47	P29401	Transketolase OS=Homo sapiens OX=9606 GN=TKT PE=1 SV=3	0	Pf00456, Pf02779, Pf02780	7086	ENSG00000163931	TKT	A8K089;B4DE31;E7EPA7;hsa:7086;P29401;Q8TBA3;Q96HH3
46583300	23692800	67235200	39134200	22272800	4345320	FALSE		5,95E+18	NaN	NaN	NaN	0	538,214	49	92	676	89	2364	274,4	5,57	78600,8	872,45	74	92	Q01082	Spectrin beta chain, non-erythrocytic 1 OS=Homo sapiens OX=9606 GN=SPTBN1 PE=1 SV=2	3	Pf00169, Pf00307, Pf00435	6711	ENSG00000115306	SPTBN1	B2RP63;hsa:6711;O60837;Q01082;Q16057;Q53R99;Q59ER3;Q8IX99
17675700	9833400	17251100	5333020	6126670	454602	TRUE	Acetyl [N-Term];Met-loss+Acetyl [N-Term]	-1,74E+17	NaN	NaN	NaN	0	531,147	89	35	1605	2	375	41,7	5,48	109906	2632,03	20	34	P60709	Actin, cytoplasmic 1 OS=Homo sapiens OX=9606 GN=ACTB PE=1 SV=1	0	Pf00022	60	ENSG00000075624	ACTB	hsa:60;P02570;P60709;P70514;P99021;Q11211;Q64316;Q75MN2;Q96B34;Q96HG5
121295000	311874000	223459000	36894700	40575200	13210800	FALSE		1,55E+18	NaN	NaN	NaN	0	521,967	80	49	642	48	505	56,7	6,35	60034	1001,47	33	49	P30101	Protein disulfide-isomerase A3 OS=Homo sapiens OX=9606 GN=PDIA3 PE=1 SV=4	1	Pf00085, Pf13848	2923	ENSG00000167004	PDIA3	hsa:2923;P30101;Q13453;Q14255;Q8IYF8;Q9UMU7
512972000	517968000	897044000	405787000	685556000	57387500	FALSE	Acetyl [N-Term];Met-loss+Acetyl [N-Term]	6,98E+18	NaN	NaN	NaN	0	521,7	89	36	1498	3	375	41,8	5,48	99916,2	2579,1	21	35	P63261	Actin, cytoplasmic 2 OS=Homo sapiens OX=9606 GN=ACTG1 PE=1 SV=1	49	Pf00022	71	ENSG00000184009	ACTG1	A8K7C2;hsa:71;P02571;P14104;P63261;P99022;Q5U032;Q96E67
25519800	15661000	38441800	216409	366524	348101	FALSE		8,5E+18	NaN	NaN	NaN	0	502,617	34	66	472	50	2725	290,8	5,97	45327,5	798,82	49	66	Q14315	Filamin-C OS=Homo sapiens OX=9606 GN=FLNC PE=1 SV=3	0	Pf00307, Pf00630	2318	ENSG00000128591	FLNC	B2ZZ88;hsa:2318;O95303;Q07985;Q14315;Q9NS12;Q9NYE5;Q9UMR8;Q9Y503
30156000	24120700	62598600	82794,2	9641,54	NaN	FALSE		2,77E+18	NaN	NaN	NaN	0	500,765	36	58	317	56	2912	314,6	4,86	31612,6	591,26	34	58	P35556	Fibrillin-2 OS=Homo sapiens OX=9606 GN=FBN2 PE=1 SV=3	0	Pf00683, Pf07645, Pf12661, Pf12662, Pf12947, Pf18193	2201	ENSG00000138829	FBN2	B4DU01;hsa:2201;P35556;Q59ES6
273906000	75865200	507595000	890573	1236390	1537870	FALSE		-1,27E+16	NaN	NaN	NaN	0	496,874	35	42	446	41	1821	194,9	5,19	44614	1061,28	28	42	Q14767	Latent-transforming growth factor beta-binding protein 2 OS=Homo sapiens OX=9606 GN=LTBP2 PE=1 SV=3	1	Pf00008, Pf00683, Pf07645	4053	ENSG00000119681	LTBP2	hsa:4053;Q14767;Q99907;Q9NS51
5736430	2051780	3998810	411021000	169129000	53756300	FALSE	Acetyl [N-Term];Met-loss+Acetyl [N-Term]	-5,01E+18	NaN	NaN	NaN	0	495,019	89	59	513	50	627	70,2	5,43	52531,5	867,52	44	58	P13796	Plastin-2 OS=Homo sapiens OX=9606 GN=LCP1 PE=1 SV=6	9	Pf00036, Pf00307	3936	ENSG00000136167	LCP1	B2R613;B4DUA0;hsa:3936;P13796;Q5TBN4
1067580000	2144150000	2309740000	1382400	3710280	2399140	FALSE		-2,2E+18	NaN	NaN	NaN	0	478,964	70	32	1496	31	368	41,6	7,52	155815	2854,29	22	32	P21810	Biglycan OS=Homo sapiens OX=9606 GN=BGN PE=1 SV=2	1	Pf01462, Pf13855	633	ENSG00000182492	BGN	D3DWU3;hsa:633;P13247;P21810
371281000	456144000	399869000	114106000	60272400	15914400	FALSE		5,58E+18	NaN	NaN	NaN	0	476,808	82	42	743	37	434	47,1	7,39	64427,3	1370,7	27	42	P06733	Alpha-enolase OS=Homo sapiens OX=9606 GN=ENO1 PE=1 SV=2	5	Pf00113, Pf03952	2023	ENSG00000074800	ENO1	B2RD59;hsa:2023;P06733;P22712;Q16704;Q4TUS4;Q53FT9;Q53HR3;Q658M5;Q6GMP2;Q71V37;Q7Z3V6;Q8WU71;Q96GV1;Q9BT62;Q9UCH6;Q9UM55
34824000	12136800	29394600	19215900	6416740	684958	FALSE	Met-loss+Acetyl [N-Term]	8,71E+18	NaN	NaN	NaN	0	470,592	59	72	483	71	1657	189,1	6,48	51793	708,09	53	72	P46940	Ras GTPase-activating-like protein IQGAP1 OS=Homo sapiens OX=9606 GN=IQGAP1 PE=1 SV=1	1	Pf00307, Pf00612, Pf00616, Pf03836	8826	ENSG00000140575	IQGAP1	A7MBM3;hsa:8826;P46940
151848000	197714000	327595000	35226600	44877500	24197400	FALSE		8,61E+18	NaN	NaN	NaN	0	469,115	83	35	539	35	417	48,1	4,44	32795,1	1214,2	16	35	P27797	Calreticulin OS=Homo sapiens OX=9606 GN=CALR PE=1 SV=1	0	Pf00262	811	ENSG00000179218	CALR	hsa:811;P27797;Q6IAT4;Q9UDG2
2830610000	4274850000	5526920000	28072700	27660500	23509300	FALSE		-7,45E+18	NaN	NaN	NaN	0	462,105	67	27	3996	27	303	34,6	4,84	343151	5288,22	19	27	P09486	SPARC OS=Homo sapiens OX=9606 GN=SPARC PE=1 SV=1	0	Pf00050, Pf09289, Pf10591	6678	ENSG00000113140	SPARC	D3DQH9;hsa:6678;P09486;Q6IBK4
126597000	203429000	184169000	13292000	26807900	2177100	TRUE		-2,74E+18	NaN	NaN	NaN	0	461,538	85	53	480	2	704	77,7	7,08	45836,6	831,74	36	52	Q0IIK2	TREMBL:Q0IIK2 (Bos taurus) Transferrin	52
NaN	33925500	NaN	NaN	NaN	NaN	TRUE		3,93E+18	NaN	NaN	NaN	0	457,015	86	52	482	1	685	75,8	6,89	45980,9	837,64	35	51	Q29443	SWISS-PROT:Q29443 Serotransferrin - Bos taurus (Bovine).	0
75319400	143541000	88451100	246604000	285439000	58737800	FALSE		3,13E+18	NaN	NaN	NaN	0	456,655	79	44	693	36	474	52,9	5,45	61197,8	1246,18	27	44	P02774	Vitamin D-binding protein OS=Homo sapiens OX=9606 GN=GC PE=1 SV=2	8	Pf00273, Pf09164	2638	ENSG00000145321	GC	B4DPP2;D6RAK8;hsa:2638;P02774;Q16309;Q16310;Q53F31;Q6GTG1
203137000	213185000	254703000	208501000	182098000	14395800	FALSE	Met-loss [N-Term]	-1,21E+18	NaN	NaN	NaN	0	449,862	76	56	683	40	577	67,8	6,4	71064,8	995,58	45	56	P26038	Moesin OS=Homo sapiens OX=9606 GN=MSN PE=1 SV=3	16	Pf00373, Pf00769, Pf09379, Pf09380, Pf20492	4478	ENSG00000147065	MSN	hsa:4478;P26038
47711300	109267000	110732000	1476590	2125740	617624	FALSE		1,36E+18	NaN	NaN	NaN	0	449,623	37	53	312	47	1806	181	5,17	28555,8	646,44	30	53	P12107	Collagen alpha-1(XI) chain OS=Homo sapiens OX=9606 GN=COL11A1 PE=1 SV=4	0	Pf01391, Pf01410	1301	ENSG00000060718	COL11A1	B1ASK7;D3DT73;E9PCU0;hsa:1301;P12107;Q14034;Q149N0;Q9UIT4;Q9UIT5;Q9UIT6
123109000	151020000	258673000	41819200	26778700	11624400	FALSE		6,83E+17	NaN	NaN	NaN	0	447,41	61	49	687	47	654	72,3	5,16	88595,5	1155,79	40	49	P11021	Endoplasmic reticulum chaperone BiP OS=Homo sapiens OX=9606 GN=HSPA5 PE=1 SV=2	2	Pf00012	3309	ENSG00000044574	HSPA5	B0QZ61;hsa:3309;P11021;Q2EF78;Q9NPF1;Q9UK02
88656900	66946600	95807200	3784170	4240590	45484	FALSE	Met-loss+Acetyl [N-Term]	-8,22E+18	NaN	NaN	NaN	0	440,585	63	55	371	55	1152	120,9	5,43	35979,3	652,3	34	55	P27816	Microtubule-associated protein 4 OS=Homo sapiens OX=9606 GN=MAP4 PE=1 SV=3	0	Pf00418	4134	ENSG00000047849	MAP4	hsa:4134;P27816;Q13082;Q59FT2;Q68D74;Q6ZUW9;Q86V26;Q96A76;Q96NS9
57746800	55887000	71718200	111526000	495189000	1875220000	FALSE	Acetyl [N-Term];Met-loss+Acetyl [N-Term]	-6,9E+18	NaN	NaN	NaN	0	439,227	79	56	371	56	806	89,3	5,26	34306	640,72	34	55	P55072	Transitional endoplasmic reticulum ATPase OS=Homo sapiens OX=9606 GN=VCP PE=1 SV=4	0	Pf00004, Pf02359, Pf02933, Pf09336, Pf17862	7415	ENSG00000165280	VCP	B2R5T8;hsa:7415;P55072;Q0V924;Q2TAI5;Q969G7;Q9UCD5
166112000	156221000	284011000	70227200	88681100	5345900	FALSE		7,19E+18	NaN	NaN	NaN	0	438,982	60	41	582	39	705	80,1	6,21	62380	974,4	28	41	P00736	Complement C1r subcomponent OS=Homo sapiens OX=9606 GN=C1R PE=1 SV=2	2	Pf00084, Pf00089, Pf00431, Pf14670	715		C1R	A6NJQ8;hsa:715;P00736;Q68D77;Q8J012
185678000	268205000	306499000	36872100	30825800	29187100	FALSE		-2,59E+18	NaN	NaN	NaN	0	437,191	83	50	579	50	508	57,1	4,87	60725,4	812,7	36	50	P07237	Protein disulfide-isomerase OS=Homo sapiens OX=9606 GN=P4HB PE=1 SV=3	0	Pf00085, Pf13848	5034	ENSG00000185624	P4HB	B2RDQ2;hsa:5034;P07237;P30037;P32079;Q15205;Q6LDE5
159612000	193860000	310864000	10318800	831798	959885	FALSE		4,79E+18	NaN	NaN	NaN	0	427,135	74	31	234	31	494	53,9	5,64	28938,4	595,22	16	31	O95965	Integrin beta-like protein 1 OS=Homo sapiens OX=9606 GN=ITGBL1 PE=2 SV=1	0	Pf07974	9358	ENSG00000198542	ITGBL1	A8K5M5;B3KTP1;B4DQ02;hsa:9358;O95965;Q8N172;Q9NPR0
441029000	411350000	366430000	79346700	49855300	26661000	FALSE	Acetyl [N-Term];Met-loss+Acetyl [N-Term]	2,73E+18	NaN	NaN	NaN	0	425,628	95	40	892	39	332	36,7	8,27	89376,9	1225,1	30	39	P00338	L-lactate dehydrogenase A chain OS=Homo sapiens OX=9606 GN=LDHA PE=1 SV=2	1	Pf00056, Pf02866	3939	ENSG00000134333;ENSG00000288299	LDHA	B4DKQ2;B7Z5E3;D3DQY3;F8W819;hsa:3939;P00338;Q53G53;Q6IBM7;Q6ZNV1;Q9UDE8;Q9UDE9
137723000	151707000	216412000	72591000	100443000	6275310	FALSE		-5,23E+18	NaN	NaN	NaN	0	421,665	57	39	598	38	688	76,6	4,96	59430,6	942,14	25	39	P09871	Complement C1s subcomponent OS=Homo sapiens OX=9606 GN=C1S PE=1 SV=1	1	Pf00084, Pf00089, Pf00431, Pf14670	716	ENSG00000182326	C1S	D3DUT4;hsa:716;P09871;Q9UCU7;Q9UCU8;Q9UCU9;Q9UCV0;Q9UCV1;Q9UCV2;Q9UCV3;Q9UCV4;Q9UCV5;Q9UM14
183057000	82638100	516900000	14231400	15416400	10446600	FALSE		-5,33E+18	NaN	NaN	NaN	0	418,357	68	40	780	40	683	74,6	7,71	78188,1	1207,54	27	40	Q15582	Transforming growth factor-beta-induced protein ig-h3 OS=Homo sapiens OX=9606 GN=TGFBI PE=1 SV=1	0	Pf02469	7045	ENSG00000120708	TGFBI	D3DQB1;hsa:7045;O14471;O14472;O14476;O43216;O43217;O43218;O43219;Q15582;Q53XM1
614590000	227981000	767223000	4050510000	5600250000	548144000	FALSE		-8,14E+18	NaN	NaN	NaN	0	414,516	71	28	2136	16	330	36,1	8,19	197053	3430,69	16	28	P01857	Immunoglobulin heavy constant gamma 1 OS=Homo sapiens OX=9606 GN=IGHG1 PE=1 SV=1	13	Pf07654		ENSG00000211896;ENSG00000277633	IGHG1	P01857
11429700	5832440	11945200	2576740000	1809640000	604595000	FALSE	Acetyl [N-Term];Met-loss [N-Term];Met-loss+Acetyl [N-Term]	-8,84E+18	NaN	NaN	NaN	0	411,561	100	21	1138	17	142	15,2	8,68	109373	1984,63	12	19	P69905	Hemoglobin subunit alpha OS=Homo sapiens OX=9606 GN=HBA2 PE=1 SV=2	5	Pf00042	3039;3040	ENSG00000188536;ENSG00000206172	HBA1;HBA2	hsa:3039;hsa:3040;P01922;P69905;Q1HDT5;Q3MIF5;Q53F97;Q96KF1;Q9NYR7;Q9UCM0
192675000	349948000	257722000	75917600	49942100	21874800	FALSE	Met-loss [N-Term]	-9,17E+18	NaN	NaN	NaN	0	410,337	91	37	545	34	364	39,4	8,09	54099,4	1098,19	22	35	P04075	Fructose-bisphosphate aldolase A OS=Homo sapiens OX=9606 GN=ALDOA PE=1 SV=2	3	Pf00274	226	ENSG00000149925	ALDOA	B4DXI7;hsa:226;P04075;Q6FH76;Q6FI10;Q96B15;Q9BWD9;Q9UCN2
8694540	6279660	10443100	82150500	137594000	6040230	FALSE		-8,31E+18	NaN	NaN	NaN	0	403,632	59	68	477	68	1676	188,2	6,52	42759,9	622,82	51	68	P01031	Complement C5 OS=Homo sapiens OX=9606 GN=C5 PE=1 SV=4	0	Pf00207, Pf01759, Pf01821, Pf01835, Pf07677, Pf07678, Pf07703, Pf17789, Pf17790, Pf17791	727	ENSG00000106804	C5	hsa:727;P01031;Q14CJ0;Q27I61
26967400	33460100	33359000	1851440	2865620	574298	FALSE		-6,13E+17	NaN	NaN	NaN	0	402,107	73	49	325	48	840	94,3	5,19	34965,8	538,61	32	49	P34932	Heat shock 70 kDa protein 4 OS=Homo sapiens OX=9606 GN=HSPA4 PE=1 SV=4	1	Pf00012	3308	ENSG00000170606	HSPA4	hsa:3308;O95756;P34932;Q2TAL4;Q9BUK9
275876000	35747600	116547000	1575010	3142450	285133	FALSE		1,57E+18	NaN	NaN	NaN	0	400,596	67	36	328	34	757	82,8	4,6	33005,5	720,23	23	36	P49747	Cartilage oligomeric matrix protein OS=Homo sapiens OX=9606 GN=COMP PE=1 SV=2	2	Pf02412, Pf05735, Pf07645, Pf11598	1311	ENSG00000105664	COMP	B4DKJ3;hsa:1311;O14592;P49747;Q16388;Q16389;Q2NL86;Q8N4T2
346891000	619776000	356667000	62991100	1471620000	10452100	FALSE		-2,09E+18	NaN	NaN	NaN	0	400,483	68	37	1333	37	418	46,7	5,59	134761	1768,91	30	37	P01009	Alpha-1-antitrypsin OS=Homo sapiens OX=9606 GN=SERPINA1 PE=1 SV=3	0	Pf00079	5265	ENSG00000197249	SERPINA1	A6PX14;B2RDQ8;hsa:5265;P01009;Q0PVP5;Q13672;Q53XB8;Q5U0M1;Q7M4R2;Q86U18;Q86U19;Q96BF9;Q96ES1;Q9P1P0;Q9UCE6;Q9UCM3
33489000	8479850	44734800	125359000	267413000	7099830	FALSE		7,12E+18	NaN	NaN	NaN	0	398,179	54	44	541	43	930	103,3	6,98	51618,3	953,67	30	43	Q14624	Inter-alpha-trypsin inhibitor heavy chain H4 OS=Homo sapiens OX=9606 GN=ITIH4 PE=1 SV=4	1	Pf00092, Pf06668, Pf08487	3700	ENSG00000055955	ITIH4	B7Z545;E9PGN5;hsa:3700;Q14624;Q15135;Q9P190;Q9UQ54
326511000	1408160000	604408000	1596270	2374110	2300930	FALSE		3,04E+17	NaN	NaN	NaN	0	396,24	86	34	615	34	308	35	5,52	61352,4	1011,78	22	34	Q12841	Follistatin-related protein 1 OS=Homo sapiens OX=9606 GN=FSTL1 PE=1 SV=1	0	Pf07648, Pf09289	11167	ENSG00000163430	FSTL1	A8K523;B4DTT5;D3DN90;hsa:11167;Q12841;Q549Z0
28324600	36453500	31978600	119872000	100339000	12107200	FALSE		-5,22E+18	NaN	NaN	NaN	0	394,121	43	51	650	51	1228	138	7,93	77490,9	936,75	45	51	Q13201	Multimerin-1 OS=Homo sapiens OX=9606 GN=MMRN1 PE=1 SV=3	0	Pf00008, Pf00386, Pf07546	22915	ENSG00000138722	MMRN1	hsa:22915;Q13201;Q4W5L1;Q6P3T8;Q6ZUL9
283973000	135283000	727092000	5222110	10019400	1728470	FALSE		-1,08E+18	NaN	NaN	NaN	0	393,49	14	38	673	38	3396	372,6	4,51	87341,7	1177,49	28	38	P13611	Versican core protein OS=Homo sapiens OX=9606 GN=VCAN PE=1 SV=3	0	Pf00008, Pf00059, Pf00084, Pf00193, Pf07686	1462	ENSG00000038427	VCAN	hsa:1462;P13611;P20754;Q13010;Q13189;Q15123;Q9UCL9;Q9UNW5
128860000	61404900	135797000	44259000	24437800	11609200	FALSE		6,72E+18	NaN	NaN	NaN	0	391,327	89	47	549	36	445	50,6	6,47	77220	937,96	36	47	P50395	Rab GDP dissociation inhibitor beta OS=Homo sapiens OX=9606 GN=GDI2 PE=1 SV=2	11	Pf00996	2665	ENSG00000057608	GDI2	hsa:2665;O43928;P50395;Q5SX88;Q9UQM6
59111400	43260600	141500000	12254100	13377800	2737780	FALSE		-8,29E+18	NaN	NaN	NaN	0	386,406	64	54	446	52	803	92,4	4,84	44267,6	644,79	40	54	P14625	Endoplasmin OS=Homo sapiens OX=9606 GN=HSP90B1 PE=1 SV=1	2	Pf00183, Pf02518	7184	ENSG00000166598	HSP90B1	hsa:7184;P14625;Q96A97
34380600	11549700	42029500	91138400	173553000	1331420	FALSE		1,22E+18	NaN	NaN	NaN	0	385,565	60	39	513	28	622	70	5,9	63212,5	830,31	30	39	P00734	Prothrombin OS=Homo sapiens OX=9606 GN=F2 PE=1 SV=2	11	Pf00051, Pf00089, Pf00594, Pf09396	2147	ENSG00000180210	F2	B2R7F7;B4E1A7;hsa:2147;P00734;Q4QZ40;Q53H04;Q53H06;Q69EZ7;Q7Z7P3;Q9UCA1
62143500	216348000	91495000	29392000	40581400	14901200	FALSE	Acetyl [N-Term];Met-loss+Acetyl [N-Term]	-1,12E+18	NaN	NaN	NaN	0	379,146	91	42	450	42	417	44,6	8,1	47064,2	742,84	30	40	P00558	Phosphoglycerate kinase 1 OS=Homo sapiens OX=9606 GN=PGK1 PE=1 SV=3	0	Pf00162	5230	ENSG00000102144	PGK1	A8K4W6;B7Z7A9;hsa:5230;P00558;Q5J7W1;Q6IBT6;Q8NI87
129992000	73096500	140241000	410893000	293850000	86833400	FALSE		-7E+17	NaN	NaN	NaN	0	374,854	63	42	513	42	782	85,6	6,28	39196	990,34	26	42	P06396	Gelsolin OS=Homo sapiens OX=9606 GN=GSN PE=1 SV=1	0	Pf00626	2934	ENSG00000148180	GSN	A2A418;A8MUD1;A8MYN7;B7Z373;B7Z5V1;F5H1A8;hsa:2934;P06396;Q5T0I2;Q8WVV7
181327000	446082000	294211000	1625860000	5122500000	181984000	FALSE		4,81E+18	NaN	NaN	NaN	0	373,9	79	35	1208	34	267	30,8	5,76	144487	1633,51	31	35	P02647	Apolipoprotein A-I OS=Homo sapiens OX=9606 GN=APOA1 PE=1 SV=1	1	Pf01442	335	ENSG00000118137	APOA1	A8K866;hsa:335;P02647;Q6LDN9;Q6Q785;Q9UCS8;Q9UCT8
100554000	92392200	91686900	87675600	45001700	30459200	FALSE	Acetyl [N-Term];Met-loss+Acetyl [N-Term]	-4,29E+18	NaN	NaN	NaN	0	370,211	70	37	551	29	558	63,1	8,32	54084,4	993,93	26	36	P06744	Glucose-6-phosphate isomerase OS=Homo sapiens OX=9606 GN=GPI PE=1 SV=4	9	Pf00342	2821	ENSG00000105220	GPI	B4DG39;hsa:2821;P06744;Q9BRD3;Q9BSK5;Q9UHE6
734371000	155554000	776790000	6391560	5155080	4395890	FALSE		-8,45E+18	NaN	NaN	NaN	0	368,166	77	33	1094	33	402	45	7,2	95422,6	1247,74	22	33	P05121	Plasminogen activator inhibitor 1 OS=Homo sapiens OX=9606 GN=SERPINE1 PE=1 SV=1	0	Pf00079	5054	ENSG00000106366	SERPINE1	B7Z4S0;F8WD53;hsa:5054;P05121
4877560	1977400	6513100	93193400	114379000	5248140	FALSE		-2,31E+18	NaN	NaN	NaN	0	361,11	71	41	377	41	732	83,2	6	38025,6	610,15	29	41	P00488	Coagulation factor XIII A chain OS=Homo sapiens OX=9606 GN=F13A1 PE=1 SV=5	0	Pf00868, Pf00927, Pf01841	2162	ENSG00000124491	F13A1	hsa:2162;P00488;Q59HA7;Q8N6X2;Q96P24;Q9BX29
80004800	136899000	119986000	77357600	63281300	13752400	FALSE		-7,72E+17	NaN	NaN	NaN	0	360,051	72	46	482	40	646	70,9	5,52	41527,2	732,77	34	46	P11142	Heat shock cognate 71 kDa protein OS=Homo sapiens OX=9606 GN=HSPA8 PE=1 SV=1	4	Pf00012	3312	ENSG00000109971	HSPA8	hsa:3312;P11142;Q9H3R6
199444000	1277060000	598083000	3029090	3975890	6083900	FALSE		4,12E+18	NaN	NaN	NaN	0	359,506	77	34	696	32	354	40,1	7,42	61633,2	1024,25	29	34	P10915	Hyaluronan and proteoglycan link protein 1 OS=Homo sapiens OX=9606 GN=HAPLN1 PE=2 SV=2	2	Pf00193, Pf07686	1404	ENSG00000145681	HAPLN1	B2R9A9;hsa:1404;P10915
36050700	10854400	62636900	34888600	27947900	2339560	FALSE		5,9E+18	NaN	NaN	NaN	0	358,937	54	45	431	44	1247	136,3	5,29	40104,9	821,29	29	45	P14543	Nidogen-1 OS=Homo sapiens OX=9606 GN=NID1 PE=1 SV=3	1	Pf00058, Pf00086, Pf06119, Pf07474, Pf07645, Pf12662, Pf12947, Pf14670	4811	ENSG00000116962	NID1	hsa:4811;P14543;Q14942;Q59FL2;Q5TAF2;Q5TAF3;Q86XD7
45546600	26183100	44397600	134694000	183153000	9121830	FALSE		6,23E+18	NaN	NaN	NaN	0	358,115	63	45	459	43	764	85,5	7,06	51504,3	763,13	28	45	P00751	Complement factor B OS=Homo sapiens OX=9606 GN=CFB PE=1 SV=2	2	Pf00084, Pf00089, Pf00092	629	ENSG00000239754;ENSG00000241253;ENSG00000241534;ENSG00000242335;ENSG00000243570;ENSG00000243649	CFB	B0QZQ6;hsa:629;O15006;P00751;Q29944;Q53F89;Q5JP67;Q5ST50;Q96HX6;Q9BTF5;Q9BX92
48616100	5151820	83578700	538403	100978	1602690	FALSE		3,65E+18	NaN	NaN	NaN	0	356,541	43	43	228	43	1712	167,4	8,66	15331,6	489,28	19	43	P08572	Collagen alpha-2(IV) chain OS=Homo sapiens OX=9606 GN=COL4A2 PE=1 SV=4	0	Pf01391, Pf01413	1284	ENSG00000134871	COL4A2	hsa:1284;P08572;Q14052;Q548C3;Q5VZA9;Q66K23
38508600	16498600	38915700	177874000	252970000	35952500	FALSE		5,2E+18	NaN	NaN	NaN	0	355,44	44	37	387	37	911	101,3	6,79	37163,3	778,01	24	37	P19827	Inter-alpha-trypsin inhibitor heavy chain H1 OS=Homo sapiens OX=9606 GN=ITIH1 PE=1 SV=3	0	Pf00092, Pf06668, Pf08487	3697	ENSG00000055957	ITIH1	A8K9N5;B2RAH9;B7Z558;B7Z8C0;F5H165;F5H7Y8;hsa:3697;P19827;P78455;Q01746;Q562G1
118339000	120259000	276862000	1716510	1988300	313997	FALSE		9,19E+18	NaN	NaN	NaN	0	350,588	67	32	393	32	461	53,8	5,25	47904,5	698,97	25	32	Q02818	Nucleobindin-1 OS=Homo sapiens OX=9606 GN=NUCB1 PE=1 SV=4	0	Pf13499	4924	ENSG00000104805	NUCB1	B2RD64;hsa:4924;Q02818;Q15838;Q7Z4J7;Q9BUR1
577930000	123726000	518200000	16465900	8635340	4279550	FALSE	Acetyl [N-Term]	4,92E+17	NaN	NaN	NaN	0	349,863	69	47	466	46	664	74,1	7,02	48025,6	793,57	39	47	P02545	Prelamin-A/C OS=Homo sapiens OX=9606 GN=LMNA PE=1 SV=1	1	Pf00038, Pf00932	4000	ENSG00000160789	LMNA	B4DI32;D3DVB0;D6RAQ3;E7EUI9;hsa:4000;P02545;P02546;Q5I6Y4;Q5I6Y6;Q5TCJ2;Q5TCJ3;Q6UYC3;Q969I8;Q96JA2
236493000	156390000	226360000	4001800	5908950	3011380	FALSE		6,1E+18	NaN	NaN	NaN	0	349,258	76	30	531	30	315	37,1	4,64	54123,4	880,65	20	30	O43852	Calumenin OS=Homo sapiens OX=9606 GN=CALU PE=1 SV=2	0	Pf13833	813	ENSG00000128595	CALU	B3KPG9;D6QS48;D6QS49;D6QS50;D6QS51;D6QS52;D6QS53;D6QS54;D6QS55;D6QS56;D6QS57;D6QS58;D6QS59;F5H1Q9;F5H879;hsa:813;O43852;O60456;Q6FHB9;Q96RL3;Q9NR43
47270000	43304500	93996700	78390	77647,5	597654	FALSE		-2,85E+18	NaN	NaN	NaN	0	347,526	47	44	265	44	950	108,1	9,72	27631,1	447,29	31	44	Q76M96	Coiled-coil domain-containing protein 80 OS=Homo sapiens OX=9606 GN=CCDC80 PE=1 SV=1	0	Pf13778	151887	ENSG00000091986	CCDC80	D3DN67;hsa:151887;Q5PR20;Q6GPG9;Q76M96;Q8IVT6;Q8NBV1;Q8NHY8
50690700	42443100	91272400	17788000	15926600	3142440	FALSE		-2,22E+18	NaN	NaN	NaN	0	347,444	63	47	344	33	724	83,2	5,03	42642	518,57	38	47	P08238	Heat shock protein HSP 90-beta OS=Homo sapiens OX=9606 GN=HSP90AB1 PE=1 SV=4	12	Pf00183, Pf02518	3326	ENSG00000096384	HSP90AB1	B2R5P0;hsa:3326;P08238;Q5T9W7;Q9NQW0;Q9NTK6
26225600	14513700	29629500	7894640	28996600	493880	FALSE	Acetyl [N-Term];Met-loss [N-Term];Met-loss+Acetyl [N-Term]	4,77E+18	NaN	NaN	NaN	0	345,581	43	50	267	50	1675	191,5	5,69	26418,8	436,1	34	49	Q00610	Clathrin heavy chain 1 OS=Homo sapiens OX=9606 GN=CLTC PE=1 SV=5	0	Pf00637, Pf01394, Pf09268, Pf13838	1213	ENSG00000141367	CLTC	D3DU00;hsa:1213;Q00610;Q6N0A0;Q86TF2
26427400	66168400	37338000	21767400	14394800	2924390	FALSE		5,99E+18	NaN	NaN	NaN	0	344,096	87	38	322	38	606	66,2	6,65	20277,4	691,51	22	38	O75083	WD repeat-containing protein 1 OS=Homo sapiens OX=9606 GN=WDR1 PE=1 SV=4	0	Pf00400	9948	ENSG00000071127	WDR1	A8K6E9;A8MPU4;hsa:9948;O75083;O75313;Q8N6E5;Q9UG05;Q9UG78;Q9UQE0
113651000	96884600	112165000	1528680000	2346230000	199750000	FALSE		-5,6E+18	NaN	NaN	NaN	0	343,625	69	31	1626	10	453	49,4	6,77	173833	2523,73	22	31	P01871	Immunoglobulin heavy constant mu OS=Homo sapiens OX=9606 GN=IGHM PE=1 SV=4	23	Pf07654		ENSG00000211899;ENSG00000282657	IGHM	A0A075B6N9;A0A0G2JQL4;P01871;P04220;P20769
293354000	252610000	352549000	308784000	176042000	130201000	FALSE	Met-loss [N-Term]	2,87E+18	NaN	NaN	NaN	0	343,318	98	31	587	31	249	26,7	6,9	66588,1	1075,33	20	30	P60174	Triosephosphate isomerase OS=Homo sapiens OX=9606 GN=TPI1 PE=1 SV=4	0	Pf00121	7167	ENSG00000111669	TPI1	B7Z5D8;D3DUS9;hsa:7167;P00938;P60174;Q6FHP9;Q6IS07;Q8WWD0;Q96AG5
162528000	78460200	254184000	2878130	2399890	354028	FALSE		1,95E+18	NaN	NaN	NaN	0	341,909	57	32	239	32	666	74,8	7,64	21114,1	507	21	32	O75326	Semaphorin-7A OS=Homo sapiens OX=9606 GN=SEMA7A PE=1 SV=1	0	Pf01403, Pf01437, Pf13895	8482	ENSG00000138623;ENSG00000288455	SEMA7A	B4DDP7;F5H1S0;hsa:8482;O75326;Q1XE81;Q1XE82;Q1XE83;Q1XE84;Q3MIY5
27715300	15347900	57547500	17549300	11147400	3975380	FALSE		-7,07E+18	NaN	NaN	NaN	0	340,249	64	46	374	34	732	84,6	5,02	45087,2	584,04	34	46	P07900	Heat shock protein HSP 90-alpha OS=Homo sapiens OX=9606 GN=HSP90AA1 PE=1 SV=5	0	Pf00183, Pf02518	3320	ENSG00000080824	HSP90AA1	A8K500;B3KPJ9;hsa:3320;P07900;Q2PP14;Q5CAQ6;Q5CAQ7;Q9BVQ5
8888620	1339020	34515600	142358000	132422000	759894	FALSE		-1,98E+18	NaN	NaN	NaN	0	339,84	17	61	219	61	5635	613	6,49	19939,2	298,9	42	59	Q96RW7	Hemicentin-1 OS=Homo sapiens OX=9606 GN=HMCN1 PE=1 SV=2	0	Pf00090, Pf07474, Pf07645, Pf07679, Pf12662, Pf13927	83872	ENSG00000143341	HMCN1	A6NGE3;hsa:83872;Q5TYR7;Q96DN3;Q96DN8;Q96RW7;Q96SC3
44473700	11249100	29597500	378531	815805	14375,5	FALSE		6,24E+18	NaN	NaN	NaN	0	334,118	42	51	221	51	1796	193,4	5,3	19351,2	392,83	31	51	Q05707	Collagen alpha-1(XIV) chain OS=Homo sapiens OX=9606 GN=COL14A1 PE=1 SV=3	0	Pf00041, Pf00092, Pf01391	7373	ENSG00000187955	COL14A1	B2RU07;hsa:7373;O00260;O00261;O00262;Q05707;Q05708;Q5XJ18;Q96C67;Q9UDF6
118222000	116540000	139781000	22289700	30620800	34400100	FALSE	Acetyl [N-Term]	-9,01E+17	NaN	NaN	NaN	0	333,265	38	38	323	38	793	93,2	5,66	35719,6	534,86	31	38	Q05682	Caldesmon OS=Homo sapiens OX=9606 GN=CALD1 PE=1 SV=3	0	Pf02029	800	ENSG00000122786	CALD1	A8K0X1;hsa:800;Q05682;Q13978;Q13979;Q14741;Q14742;Q9UD91
48356000	21765800	52879300	401576000	578196000	17836800	FALSE		6,65E+18	NaN	NaN	NaN	0	328,014	72	27	1887	14	377	41,3	7,9	201871	2504,58	20	27	P01860	Immunoglobulin heavy constant gamma 3 OS=Homo sapiens OX=9606 GN=IGHG3 PE=1 SV=2	6	Pf07654			IGHG3	A0A075B6N8;A2NU35;P01860
145967000	146456000	171180000	118196000	53685600	3619060	FALSE		5,62E+17	NaN	NaN	NaN	0	326,738	86	29	490	29	335	36	8,46	33226	1013,47	15	29	P04406	Glyceraldehyde-3-phosphate dehydrogenase OS=Homo sapiens OX=9606 GN=GAPDH PE=1 SV=3	0	Pf00044, Pf02800	2597	ENSG00000111640	GAPDH	E7EUT4;hsa:2597;P00354;P04406;Q53X65
147724000	83367700	181072000	1191550	1814820	1894660	FALSE		-2,55E+18	NaN	NaN	NaN	0	324,498	79	28	365	28	449	47,9	7,43	38297,1	764,09	18	28	Q15113	Procollagen C-endopeptidase enhancer 1 OS=Homo sapiens OX=9606 GN=PCOLCE PE=1 SV=2	0	Pf00431, Pf01759	5118	ENSG00000106333	PCOLCE	B2R9E1;hsa:5118;O14550;Q15113
54630900	56258100	69854100	238481000	148908000	54886000	FALSE	Acetyl [N-Term];Met-loss+Acetyl [N-Term]	1,98E+18	NaN	NaN	NaN	0	324,213	69	35	481	34	475	51,9	8,06	51840	789,11	25	34	Q01518	Adenylyl cyclase-associated protein 1 OS=Homo sapiens OX=9606 GN=CAP1 PE=1 SV=5	1	Pf01213, Pf08603	10487	ENSG00000131236	CAP1	hsa:10487;Q01518;Q53HR7;Q5T0S1;Q5T0S2;Q6I9U6
224992000	231084000	279140000	2065370000	2326580000	221093000	FALSE		-6,47E+18	NaN	NaN	NaN	0	322,962	76	21	748	13	353	37,6	6,51	51632,3	1567,02	11	21	P01876	Immunoglobulin heavy constant alpha 1 OS=Homo sapiens OX=9606 GN=IGHA1 PE=1 SV=2	8	Pf07654		ENSG00000211895;ENSG00000282633	IGHA1	P01876
24052400	2149380	13977200	119025	311179	35945,1	FALSE		-4,49E+18	NaN	NaN	NaN	0	321,726	27	52	180	51	3122	343,7	6,4	16274,1	260,52	32	52	P24043	Laminin subunit alpha-2 OS=Homo sapiens OX=9606 GN=LAMA2 PE=1 SV=4	1	Pf00052, Pf00053, Pf00054, Pf00055, Pf06008, Pf06009	3908	ENSG00000196569	LAMA2	hsa:3908;P24043;Q14736;Q5VUM2;Q93022
2533020	6966860	2801110	32759100	47967300	4776290	FALSE	Met-loss [N-Term]	-4,94E+18	NaN	NaN	NaN	0	318,946	73	30	571	13	348	39	7,09	68025,4	790,01	24	29	P00739	Haptoglobin-related protein OS=Homo sapiens OX=9606 GN=HPR PE=2 SV=2	0	Pf00089	3250	ENSG00000261701	HPR	hsa:3250;P00739;Q7LE20;Q92658;Q92659;Q9ULB0
131530000	59531000	127712000	410842000	618743000	49051500	FALSE		6,92E+18	NaN	NaN	NaN	0	318,813	69	31	790	30	462	51,6	7,02	53935,6	1411,37	21	31	P02790	Hemopexin OS=Homo sapiens OX=9606 GN=HPX PE=1 SV=2	1	Pf00045	3263	ENSG00000110169	HPX	B2R957;hsa:3263;P02790
28103800	35129600	64327600	1980560	3970500	355619	FALSE		-7,58E+18	NaN	NaN	NaN	0	317,113	65	45	308	44	645	72,9	5,07	28401,6	372,7	32	45	P13667	Protein disulfide-isomerase A4 OS=Homo sapiens OX=9606 GN=PDIA4 PE=1 SV=2	0	Pf00085, Pf13848	9601	ENSG00000155660	PDIA4	A8K4K6;hsa:9601;P13667;Q549T6
39237800	31650800	49206200	367925	4839460	90308	FALSE		3,95E+18	NaN	NaN	NaN	0	316,613	35	43	229	43	1410	152,4	8,6	27360,9	334,94	37	42	Q9P2E9	Ribosome-binding protein 1 OS=Homo sapiens OX=9606 GN=RRBP1 PE=1 SV=5	0	Pf05104	6238	ENSG00000125844	RRBP1	A0A0A0MRV0;A2A2S6;A6NCN6;hsa:6238;O75300;O75301;Q5W165;Q96SB2;Q9BWP1;Q9H476;Q9P2E9
147983000	64755900	141453000	1285910000	1928700000	172301000	FALSE		-4,95E+18	NaN	NaN	NaN	0	307,141	74	25	2054	12	326	35,9	7,59	180123	3020,96	14	25	P01859	Immunoglobulin heavy constant gamma 2 OS=Homo sapiens OX=9606 GN=IGHG2 PE=1 SV=2	2	Pf07654		ENSG00000211893;ENSG00000274497	IGHG2	A6NE66;P01859
10898300	4173340	20444100	1179220	645022	54292,4	FALSE		-6,25E+18	NaN	NaN	NaN	0	300,604	30	46	219	46	2511	273,3	6,44	19764,2	365,95	27	46	P49327	Fatty acid synthase OS=Homo sapiens OX=9606 GN=FASN PE=1 SV=3	0	Pf00107, Pf00109, Pf00550, Pf00698, Pf00975, Pf02801, Pf08242, Pf08659, Pf14765, Pf16197	2194	ENSG00000169710	FASN	hsa:2194;P49327;Q13479;Q16702;Q4LE83;Q6P4U5;Q6SS02;Q969R1;Q96C68;Q96IT0
54370900	78070000	72175500	1277590	185872	524197	FALSE		6,71E+18	NaN	NaN	NaN	0	298,874	63	26	233	26	418	46,4	8,69	22914,3	474,82	17	26	P50454	Serpin H1 OS=Homo sapiens OX=9606 GN=SERPINH1 PE=1 SV=2	0	Pf00079	871	ENSG00000149257	SERPINH1	B3KVJ3;hsa:871;P29043;P50454;Q5XPB4;Q6NSJ6;Q8IY96;Q9NP88
267763000	690896000	412573000	23282100	2345480	2830530	FALSE		5,24E+18	NaN	NaN	NaN	0	297,556	66	20	384	20	220	24,4	7,49	35152,7	766,63	13	20	P16035	Metalloproteinase inhibitor 2 OS=Homo sapiens OX=9606 GN=TIMP2 PE=1 SV=2	0	Pf00965	7077	ENSG00000035862	TIMP2	hsa:7077;P16035;Q16121;Q93006;Q9UDF7
46867600	19071900	39942600	3895930	1749100	207905	FALSE	Acetyl [N-Term];Met-loss+Acetyl [N-Term]	-5,79E+18	NaN	NaN	NaN	0	297,527	64	45	228	45	893	99,3	5,48	21919,2	362,86	30	44	Q14764	Major vault protein OS=Homo sapiens OX=9606 GN=MVP PE=1 SV=4	0	Pf01505, Pf11978, Pf17794, Pf17795, Pf17796	9961	ENSG00000013364	MVP	hsa:9961;Q14764;Q96BG4;Q9BPW6;Q9BQT1;Q9UBD1
67270700	27910300	80669400	11696300	34393000	3753420	TRUE		5,45E+18	NaN	NaN	NaN	0	291,259	30	16	227	16	653	68,1	7,24	31350,5	579,13	10	16	P15636	SWISS-PROT:P15636 Protease I precursor Lysyl endopeptidase Achromobacter lyticus.	0	Pf01483, Pf18911
7262190	3980020	8359060	98106300	134924000	22971600	FALSE		-6,91E+18	NaN	NaN	NaN	0	290,747	62	29	322	29	597	67	7,3	37213,3	548,7	21	29	P04003	C4b-binding protein alpha chain OS=Homo sapiens OX=9606 GN=C4BPA PE=1 SV=2	0	Pf00084, Pf18453	722	ENSG00000123838	C4BPA	hsa:722;P04003;Q5VVQ8
30267300	13957900	31602200	1491240	762014	475292	FALSE	Acetyl [N-Term]	5,51E+18	NaN	NaN	NaN	0	289,838	72	40	296	31	630	70,8	5,6	32976,5	447,81	33	40	P13797	Plastin-3 OS=Homo sapiens OX=9606 GN=PLS3 PE=1 SV=4	1	Pf00307, Pf13499	5358	ENSG00000102024	PLS3	A8K579;B1AQ09;B4DGB4;B7Z6M1;hsa:5358;P13797;Q86YI6
58684700	22296600	113015000	306600	367671	541112	FALSE		-3,01E+18	NaN	NaN	NaN	0	287,25	35	31	194	31	1158	130,8	5,11	25014,5	403,51	22	31	Q8IUX7	Adipocyte enhancer-binding protein 1 OS=Homo sapiens OX=9606 GN=AEBP1 PE=1 SV=1	0	Pf00246, Pf00754, Pf13620	165	ENSG00000106624	AEBP1	hsa:165;Q14113;Q59ER7;Q6ZSC7;Q7KZ79;Q8IUX7
64580200	136497000	68149900	133152000	181649000	27756400	FALSE		3,18E+18	NaN	NaN	NaN	0	286,772	48	32	463	31	644	71,9	6,81	50841,6	657,22	25	32	P01042	Kininogen-1 OS=Homo sapiens OX=9606 GN=KNG1 PE=1 SV=2	1	Pf00031	3827	ENSG00000113889	KNG1	A8K474;B2RCR2;C9JEX1;hsa:3827;P01042;P01043;Q53EQ0;Q6PAU9;Q7M4P1
9344900	18976800	16802100	102975	148777	343089	FALSE		1,98E+18	NaN	NaN	NaN	0	286,669	25	50	182	50	2828	312	8,32	19151,8	263,11	36	50	Q9NR99	Matrix-remodeling-associated protein 5 OS=Homo sapiens OX=9606 GN=MXRA5 PE=1 SV=3	0	Pf07679, Pf13855, Pf13927	25878	ENSG00000101825	MXRA5	hsa:25878;Q6P1M7;Q9NR99;Q9Y3Y8
417881000	404291000	383358000	11599100	20003000	3514110	FALSE		5,07E+18	NaN	NaN	NaN	0	285,469	74	30	577	24	418	46,3	6,38	60726,1	712,69	23	30	P36955	Pigment epithelium-derived factor OS=Homo sapiens OX=9606 GN=SERPINF1 PE=1 SV=4	6	Pf00079	5176	ENSG00000132386	SERPINF1	F1T092;hsa:5176;P36955;Q13236;Q2TU83;Q96CT1;Q96R01;Q9BWA4
13510100	13190,7	29067500	NaN	NaN	NaN	TRUE		1,25E+18	NaN	NaN	NaN	0	284,03	22	25	282	3	1466	138,4	6,43	26164,8	594,79	16	25	P04258	SWISS-PROT:P04258 (Bos taurus) Similar to Collagen alpha 1(III) chain	0	Pf00093, Pf01391, Pf01410	510833	ENSBIXG00000028355;ENSBTAG00000021466	COL3A1	A0A4W2F3U8;bta:510833;F1MXS8;Q08E14
130646000	3146410	128792000	26914100	21921900	1882040	FALSE		-3,97E+18	NaN	NaN	NaN	0	281,057	52	38	206	34	644	66	8,12	21320,9	283,95	30	38	P04264	Keratin, type II cytoskeletal 1 OS=Homo sapiens OX=9606 GN=KRT1 PE=1 SV=6	4	Pf00038, Pf16208, Pf16210	3848	ENSG00000167768	KRT1	B2RA01;hsa:3848;P04264;P85925;P86104;Q14720;Q6GSJ0;Q9H298
39496000	41546200	105047000	1157080	2064250	595420	FALSE	Met-loss [N-Term]	6,67E+18	NaN	NaN	NaN	0	280,895	76	25	250	4	445	49,8	4,89	29699	446,39	17	24	P68371	Tubulin beta-4B chain OS=Homo sapiens OX=9606 GN=TUBB4B PE=1 SV=1	25	Pf00091, Pf03953	10383	ENSG00000188229	TUBB4B	A2BFA2;hsa:10383;P05217;P68371
48231100	44558800	45087500	192893	288132	592544	FALSE		5,3E+18	NaN	NaN	NaN	0	280,13	47	32	237	32	774	86,7	6,38	25555,4	398,43	22	31	Q9Y4K0	Lysyl oxidase homolog 2 OS=Homo sapiens OX=9606 GN=LOXL2 PE=1 SV=1	0	Pf00530, Pf01186	4017	ENSG00000134013	LOXL2	B2R5Q0;hsa:4017;Q53HV3;Q9BW70;Q9Y4K0;Q9Y5Y8
5310200	1519510	10741600	83019,9	208206	15239,4	FALSE	Met-loss [N-Term]	6,48E+18	NaN	NaN	NaN	0	278,966	72	23	260	4	444	49,6	4,89	30968,7	470,83	16	22	P07437	Tubulin beta chain OS=Homo sapiens OX=9606 GN=TUBB PE=1 SV=2	0	Pf00091, Pf03953	203068	ENSG00000183311;ENSG00000196230;ENSG00000224156;ENSG00000227739;ENSG00000229684;ENSG00000232421;ENSG00000232575;ENSG00000235067	TUBB	hsa:203068;P05218;P07437;Q8WUC1;Q9CY33
19614400	42362900	52780100	3305920	5129890	2035880	TRUE		1,49E+18	NaN	NaN	NaN	0	278,112	76	31	502	5	284	33	4,69	58193,1	667,89	29	31	Q3SX28	TREMBL:Q3SX28;Q5KR48 (Bos taurus) Tropomyosin 2	7	Pf00261	100125984;100471103;101114931;101353128;101382361;101976903;102542609;102737237;103265468;103667083;104993015;109270167;109563013	ENSAMEG00000009574;ENSBIXG00000019614;ENSBIXG00005009306;ENSCAFG00020016653;ENSCAFG00845009024;ENSCHIG00010011441;ENSFCAG00000012746;ENSJJAG00000000463;ENSMMSG00000015633;ENSNGAG00000009787;ENSOCUG00000010198;ENSSSCG00025051647;ENSSSCG00040013919;ENSSSUG00005013613;ENSSTOG00000005060;ENSUPAG00010017829	LOC101353128;LOC111145591;TLN1;Tpm2;TPM2	A0A068BGJ4;A0A1U7TXY2;A0A2U3VCL1;A0A2U3YUZ1;A0A2Y9DD27;A0A2Y9HC37;A0A2Y9J5N8;A0A384CEZ4;A0A3Q7MNR4;A0A3Q7TUZ3;A0A4W2EHP7;A0A673UIT7;A0A6I9I5E4;A0A6J0WGI8;A0A6J1XRY5;A0A6J2EXG7;A0A6P3E5X1;A0A6P3HPG3;A0A6P4WFK3;A0A6P5C8A8;A0A8B6YM68;A0A8B7AGH7;A0A8C0KXY3;A0A8C2QXD1;A0A8C5NU45;A0A8C6FP88;A0A8C6QPZ5;A0A8D1DIF5;A0A8D2I4D2;A0A8I3RWJ7;G1LTE9;I3M5E8;M3WHI1
9676880	9569000	11548100	3178700000	2883780000	1006120000	FALSE	Acetyl [N-Term];Met-loss+Acetyl [N-Term]	-2,76E+18	NaN	NaN	NaN	0	277,946	99	23	1680	14	147	16	7,28	181068	1929,33	13	22	P68871	Hemoglobin subunit beta OS=Homo sapiens OX=9606 GN=HBB PE=1 SV=2	9	Pf00042	3043	ENSG00000244734	HBB	A4GX73;B2ZUE0;hsa:3043;P02023;P68871;Q13852;Q14481;Q14510;Q45KT0;Q549N7;Q6FI08;Q6R7N2;Q8IZI1;Q9BX96;Q9UCD6;Q9UCP8;Q9UCP9
16152400	36783400	25235300	116009000	58277700	21814700	FALSE	Acetyl [N-Term];Met-loss+Acetyl [N-Term]	8,36E+18	NaN	NaN	NaN	0	274,605	76	32	327	32	527	59,7	7,39	39012,4	570,99	23	31	P04040	Catalase OS=Homo sapiens OX=9606 GN=CAT PE=1 SV=3	0	Pf00199, Pf06628	847	ENSG00000121691	CAT	A8K6C0;B2RCZ9;D3DR07;hsa:847;P04040;Q2M1U4;Q4VXX5;Q9BWT9;Q9UC85
857730	48765,3	1485850	29526200	19774700	20052600	FALSE		5,11E+18	NaN	NaN	NaN	0	274,25	59	38	254	36	710	78,1	8,12	30172,7	376,37	33	38	P02788	Lactotransferrin OS=Homo sapiens OX=9606 GN=LTF PE=1 SV=6	0	Pf00405	4057	ENSG00000012223	LTF	A8K9U8;B2MV13;B7Z4X2;E7EQH5;hsa:4057;O00756;P02788;Q16780;Q16785;Q16786;Q16789;Q5DSM0;Q8IU92;Q8IZH6;Q8TCD2;Q96KZ4;Q96KZ5;Q9H1Z3;Q9UCY5
5793880	4154630	5949170	5198210	9419780	1693600	FALSE		7,99E+18	NaN	NaN	NaN	0	273,702	65	36	186	35	623	62	5,24	16639,7	266,06	22	36	P35527	Keratin, type I cytoskeletal 9 OS=Homo sapiens OX=9606 GN=KRT9 PE=1 SV=3	1	Pf00038	3857	ENSG00000171403	KRT9	hsa:3857;O00109;P35527;Q0IJ47;Q14665
151457000	63624300	249014000	25974500	5077480	56979,9	FALSE		-6,51E+18	NaN	NaN	NaN	0	271,495	38	35	247	35	981	109,7	4,91	21545	388,19	24	35	O94985	Calsyntenin-1 OS=Homo sapiens OX=9606 GN=CLSTN1 PE=1 SV=1	0	Pf00028, Pf13385, Pf19699	22883	ENSG00000171603	CLSTN1	A8K183;hsa:22883;O94985;Q5SR52;Q5UE58;Q71MN0;Q8N4K9
35624500	9388220	45645800	5244130	5412860	484282	FALSE		6,08E+18	NaN	NaN	NaN	0	269,475	37	39	337	39	1445	161,6	5,85	36708	447,05	31	39	Q6YHK3	CD109 antigen OS=Homo sapiens OX=9606 GN=CD109 PE=1 SV=2	0	Pf00207, Pf01835, Pf07677, Pf07678, Pf07703, Pf17791	135228	ENSG00000156535	CD109	A5YKK4;B2R948;B3KW25;hsa:135228;Q0P6K7;Q5SYA8;Q5XUM7;Q5XUM9;Q6MZI7;Q6YHK3;Q8N3A7;Q8N915;Q8TDJ2;Q8TDJ3
51659700	44372300	185990000	80074800	78186100	25102200	FALSE		8,78E+18	NaN	NaN	NaN	0	268,05	68	28	513	28	540	60,6	6,71	40406,9	945,36	21	28	Q16610	Extracellular matrix protein 1 OS=Homo sapiens OX=9606 GN=ECM1 PE=1 SV=2	0	Pf05782	1893	ENSG00000143369	ECM1	A8K8S0;B4DW49;B4DY60;hsa:1893;O43266;Q16610;Q5T5G4;Q5T5G5;Q5T5G6;Q8IZ60
31009700	15008900	37912600	30066,2	379727	8122,9	FALSE		4,32E+18	NaN	NaN	NaN	0	267,787	52	33	170	33	863	98,9	7,37	17245,8	313,1	19	33	Q13822	Ectonucleotide pyrophosphatase/phosphodiesterase family member 2 OS=Homo sapiens OX=9606 GN=ENPP2 PE=1 SV=3	0	Pf01033, Pf01223, Pf01663	5168	ENSG00000136960	ENPP2	A8UHA1;E9PHP7;hsa:5168;Q13822;Q13827;Q14555;Q15117;Q9UCQ8;Q9UCR0;Q9UCR1;Q9UCR2;Q9UCR3;Q9UCR4
53866300	63581000	52583500	203231	597383	125081	FALSE	Met-loss [N-Term]	3,85E+18	NaN	NaN	NaN	0	267,578	78	37	178	37	592	64,6	6,71	17254,2	284,38	23	36	P31939	Bifunctional purine biosynthesis protein ATIC OS=Homo sapiens OX=9606 GN=ATIC PE=1 SV=3	0	Pf01808, Pf02142	471	ENSG00000138363	ATIC	A8K202;E9PBU3;hsa:471;P31939;Q13856;Q53S28
13042900	12233500	11374700	2937070	2383150	437405	FALSE		-5,36E+18	NaN	NaN	NaN	0	265,711	78	33	307	22	447	50,6	5,14	42037,4	507,39	27	33	P31150	Rab GDP dissociation inhibitor alpha OS=Homo sapiens OX=9606 GN=GDI1 PE=1 SV=2	0	Pf00996	2664	ENSG00000203879	GDI1	hsa:2664;P31150;P50394;Q6FG50;Q7Z2G6;Q7Z2G9;Q7Z2H5;Q7Z2I6
60551200	103554000	72586300	78439,2	66330,3	149336	FALSE	Acetyl [N-Term]	-5,99E+18	NaN	NaN	NaN	0	265,631	84	32	176	32	370	40,4	7,66	16403,8	288,35	21	32	Q9Y617	Phosphoserine aminotransferase OS=Homo sapiens OX=9606 GN=PSAT1 PE=1 SV=2	0	Pf00266	29968	ENSG00000135069	PSAT1	hsa:29968;Q5T7G5;Q5T7G6;Q96AW2;Q9BQ12;Q9Y617
359267000	133958000	301890000	134514000	119662000	12347500	FALSE	Acetyl [N-Term]	-9,14E+18	NaN	NaN	NaN	0	263,112	86	25	768	21	245	27,7	4,79	91508,6	920,97	22	25	P63104	14-3-3 protein zeta/delta OS=Homo sapiens OX=9606 GN=YWHAZ PE=1 SV=1	2	Pf00244	7534	ENSG00000164924	YWHAZ	A8K1N0;B7Z465;hsa:7534;P29213;P29312;P63104;Q32P43;Q5XJ08;Q6GPI2;Q6IN74;Q6NUR9;Q6P3U9;Q86V33
77175400	41143400	120134000	53081600	60062500	14448300	FALSE		4,14E+18	NaN	NaN	NaN	0	261,99	53	25	290	25	703	77,2	5,22	18727,4	706,43	12	25	P23142	Fibulin-1 OS=Homo sapiens OX=9606 GN=FBLN1 PE=1 SV=4	0	Pf07645, Pf12662	2192	ENSG00000077942	FBLN1	B0QY42;B1AHL4;hsa:2192;P23142;P23143;P23144;P37888;Q5TIC4;Q8TBH8;Q9HBQ5;Q9UC21;Q9UGR4;Q9UH41
83523500	82064400	76263100	36462200	17755700	9245010	FALSE	Acetyl [N-Term]	-7,58E+18	NaN	NaN	NaN	0	259,22	89	22	390	22	254	28,8	7,18	38052,2	638,12	16	21	P18669	Phosphoglycerate mutase 1 OS=Homo sapiens OX=9606 GN=PGAM1 PE=1 SV=2	0	Pf00300	5223	ENSG00000171314	PGAM1	hsa:5223;P18669;Q9BWC0
32483800	10365700	26268200	3331970	2239150	288282	FALSE		-1,55E+17	NaN	NaN	NaN	0	258,714	62	31	180	31	708	76,5	5,07	18071,2	343,83	17	31	P20810	Calpastatin OS=Homo sapiens OX=9606 GN=CAST PE=1 SV=4	0	Pf00748	831	ENSG00000153113	CAST	B7Z468;G5E946;G5E9D3;hsa:831;O95360;P20810;Q05DE8;Q7Z4K0;Q96D08;Q9H1Z5
256671000	264686000	441633000	941689000	1076230000	170548000	FALSE	Acetyl [N-Term];Met-loss+Acetyl [N-Term]	1,15E+17	NaN	NaN	NaN	0	257,83	86	32	748	17	248	28,5	4,69	78860,7	920,29	29	31	P67936	Tropomyosin alpha-4 chain OS=Homo sapiens OX=9606 GN=TPM4 PE=1 SV=3	16	Pf00261	7171	ENSG00000167460	TPM4	hsa:7171;P07226;P67936;Q15659;Q5U0D9;Q9BU85;Q9H8Q3;Q9UCS1;Q9UCS2;Q9UCS3;Q9UCS4
59433000	10877700	159600000	3723440	3260630	113797	FALSE		6,24E+18	NaN	NaN	NaN	0	257,04	48	33	292	33	747	82,5	8,92	32970,8	459,09	28	33	O00391	Sulfhydryl oxidase 1 OS=Homo sapiens OX=9606 GN=QSOX1 PE=1 SV=3	0	Pf00085, Pf04777, Pf18108, Pf18371	5768	ENSG00000116260	QSOX1	hsa:5768;O00391;Q59G29;Q5T2X0;Q8TDL6;Q8WVP4
30933200	21472200	29692200	67844100	40772800	11910500	FALSE	Met-loss [N-Term]	7,46E+18	NaN	NaN	NaN	0	255,681	54	33	372	33	611	69,2	6,18	39192,7	486,48	26	31	P09960	Leukotriene A-4 hydrolase OS=Homo sapiens OX=9606 GN=LTA4H PE=1 SV=2	0	Pf01433, Pf09127, Pf17900	4048	ENSG00000111144	LTA4H	B4DNQ9;F8VV40;hsa:4048;P09960;Q6IAT6;Q9UCT7
6590700	16200400	8539650	373222	909367	50653,3	TRUE		7,2E+18	NaN	NaN	NaN	0	253,576	68	28	231	5	474	53,3	5,52	17762,1	529,59	15	28	Q3MHN5	SWISS-PROT:Q3MHN5 (Bos taurus) Vitamin D-binding protein precursor	15	Pf00273, Pf09164	530076		GC	bta:530076;Q3MHN5
158606000	173557000	312894000	424762	741229	118515	FALSE		5,62E+18	NaN	NaN	NaN	0	253,288	60	27	338	27	398	44	9,29	36775,4	485,67	23	27	P07093	Glia-derived nexin OS=Homo sapiens OX=9606 GN=SERPINE2 PE=1 SV=1	0	Pf00079	5270	ENSG00000135919	SERPINE2	B2R6A4;B4DIF2;hsa:5270;P07093;Q53S15;Q5D0C4
26418000	5840420	33319100	311991000	330942000	71739700	FALSE		1,2E+18	NaN	NaN	NaN	0	252,652	42	27	421	27	525	59,5	7,5	45437,5	661,76	24	27	P04196	Histidine-rich glycoprotein OS=Homo sapiens OX=9606 GN=HRG PE=1 SV=1	0	Pf00031	3273	ENSG00000113905	HRG	B9EK35;D3DNU7;hsa:3273;P04196
49068300	26294700	127763000	201430	752899	424791	FALSE		-5,48E+18	NaN	NaN	NaN	0	250,509	12	29	161	29	4391	468,5	6,51	14421	335,01	13	29	P98160	Basement membrane-specific heparan sulfate proteoglycan core protein OS=Homo sapiens OX=9606 GN=HSPG2 PE=1 SV=4	0	Pf00008, Pf00052, Pf00053, Pf00054, Pf00057, Pf02210, Pf07679, Pf13927	3339	ENSG00000142798	HSPG2	hsa:3339;P98160;Q16287;Q5SZI3;Q9H3V5
15007600	17820200	27924100	943329	1023920	147297	FALSE		2,43E+18	NaN	NaN	NaN	0	249,988	55	38	191	38	1058	117,8	5,76	19427,3	302,5	24	38	P22314	Ubiquitin-like modifier-activating enzyme 1 OS=Homo sapiens OX=9606 GN=UBA1 PE=1 SV=3	0	Pf00899, Pf09358, Pf10585, Pf16190, Pf16191	7317	ENSG00000130985	UBA1	hsa:7317;P22314;Q5JRR8;Q96E13
193430000	397018000	232702000	57539300	62017300	21300300	FALSE	Met-loss [N-Term]	2,26E+18	NaN	NaN	NaN	0	248,932	92	18	393	18	165	18	7,81	27990,9	750,62	11	17	P62937	Peptidyl-prolyl cis-trans isomerase A OS=Homo sapiens OX=9606 GN=PPIA PE=1 SV=2	0	Pf00160	5478	ENSG00000196262	PPIA	A8K220;hsa:5478;P05092;P62937;Q3KQW3;Q567Q0;Q6IBU5;Q96IX3;Q9BRU4;Q9BTY9;Q9UC61
2662260	245784	2726400	NaN	33351,8	3089,66	TRUE		8,26E+18	NaN	NaN	NaN	0	248,681	63	26	225	3	475	53,6	6,05	18094,8	522,49	15	26	ENSEMBL:ENSBTAP00000018229	(Bos taurus) 54 kDa protein	0
15752700	31196600	20771500	66706500	155962000	979832	FALSE		6,06E+18	NaN	NaN	NaN	0	248,225	72	34	342	34	396	45,3	5,38	38938,8	486,43	30	34	P06727	Apolipoprotein A-IV OS=Homo sapiens OX=9606 GN=APOA4 PE=1 SV=4	0	Pf01442	337	ENSG00000110244	APOA4	A8MSL6;hsa:337;P06727;Q14CW8;Q6Q787
8935030	9253920	8607230	260855000	259904000	34390800	FALSE		-7,54E+18	NaN	NaN	NaN	0	247,733	58	21	449	20	491	54,5	6,29	38402,2	598,58	13	21	P08697	Alpha-2-antiplasmin OS=Homo sapiens OX=9606 GN=SERPINF2 PE=1 SV=3	1	Pf00079	5345	ENSG00000167711;ENSG00000276838	SERPINF2	B4E1B7;hsa:5345;P08697;Q8N5U7;Q9UCG2;Q9UCG3
7946500	14181500	7412340	43250700	48262100	22254500	FALSE		-7,35E+18	NaN	NaN	NaN	0	247,725	73	21	1504	14	327	35,9	7,36	131237	2128,06	11	21	P01861	Immunoglobulin heavy constant gamma 4 OS=Homo sapiens OX=9606 GN=IGHG4 PE=1 SV=1	0	Pf07654		ENSG00000211892;ENSG00000277016	IGHG4	P01861
708344	185480	1450840	35634900	40180600	3866540	FALSE		-8,8E+18	NaN	NaN	NaN	0	246,011	54	30	209	30	788	87	5,24	20234,5	372,05	22	30	P05106	Integrin beta-3 OS=Homo sapiens OX=9606 GN=ITGB3 PE=1 SV=2	0	Pf00362, Pf07965, Pf07974, Pf08725, Pf17205, Pf18372	3690	ENSG00000259207	ITGB3	A0PJW2;D3DXJ8;hsa:3690;O15495;P05106;Q12806;Q13413;Q14648;Q16499
171213	NaN	42149,3	61076500	32888500	7600480	FALSE		7,3E+18	NaN	NaN	NaN	0	245,657	55	31	252	31	707	78,4	6,06	27663,7	384,37	23	31	P14780	Matrix metalloproteinase-9 OS=Homo sapiens OX=9606 GN=MMP9 PE=1 SV=3	0	Pf00040, Pf00045, Pf00413, Pf01471	4318	ENSG00000100985	MMP9	B2R7V9;hsa:4318;P14780;Q3LR70;Q8N725;Q9H4Z1;Q9UCJ9;Q9UCL1;Q9UDK2
16048800	12471300	16377600	3447210	2040900	196446	FALSE	Acetyl [N-Term];Met-loss+Acetyl [N-Term]	4,78E+18	NaN	NaN	NaN	0	244,155	73	32	189	32	475	52,8	5,97	18494,2	284,36	19	31	Q96KP4	Cytosolic non-specific dipeptidase OS=Homo sapiens OX=9606 GN=CNDP2 PE=1 SV=2	0	Pf01546, Pf07687	55748	ENSG00000133313	CNDP2	B3KUG4;hsa:55748;Q8WY59;Q96KP4;Q9BQ94;Q9NVB4;V9HWE5
10534800	15393700	12079300	107216	1091760	15786,1	TRUE		5,29E+18	NaN	NaN	NaN	0	243,575	60	28	152	26	610	68,5	6,29	16205,7	256,74	21	28	Q3SZ57	SWISS-PROT:Q3SZ57 (Bos taurus) Alpha-fetoprotein precursor	0	Pf00273	506011	ENSBTAG00000017131	AFP	bta:506011;Q3SZ57
34424400	37056200	48100100	38270,8	136310	22118,9	FALSE		7,36E+18	NaN	NaN	NaN	0	243,494	26	25	144	25	1068	117,8	9,42	14596,2	319,47	15	25	Q7Z7G0	Target of Nesh-SH3 OS=Homo sapiens OX=9606 GN=ABI3BP PE=1 SV=2	0	Pf00041	25890	ENSG00000154175	ABI3BP	B3KSL4;hsa:25890;Q6ZW20;Q6ZW22;Q7Z7G0;Q9C082;Q9UFI6
15438400	21510900	14495200	69125200	185108000	1347950	FALSE		-8,75E+18	NaN	NaN	NaN	0	242,736	41	34	351	25	946	106,4	6,86	34043	454,4	25	34	P19823	Inter-alpha-trypsin inhibitor heavy chain H2 OS=Homo sapiens OX=9606 GN=ITIH2 PE=1 SV=2	9	Pf00092, Pf06668, Pf08487	3698	ENSG00000151655	ITIH2	hsa:3698;P19823;Q14659;Q15484;Q5T986
21792800	3789690	25889300	90810,8	51250	45469,8	FALSE		5,29E+17	NaN	NaN	NaN	0	242,617	36	34	169	34	1479	166,6	5,83	15452,8	269,77	20	33	Q9UBG0	C-type mannose receptor 2 OS=Homo sapiens OX=9606 GN=MRC2 PE=1 SV=2	0	Pf00040, Pf00059	9902	ENSG00000011028	MRC2	A6H8K4;D3DU08;hsa:9902;Q7LGE7;Q9UBG0;Q9Y5P9
NaN	682812	NaN	NaN	NaN	NaN	FALSE		6,27E+18	NaN	NaN	NaN	0	241,158	70	28	498	1	284	32,8	4,7	58243,6	670,1	27	28	P07951	Tropomyosin beta chain OS=Homo sapiens OX=9606 GN=TPM2 PE=1 SV=1	0	Pf00261	7169	ENSG00000198467	TPM2	A6NM85;hsa:7169;P06468;P07951;Q13894;Q53FM4;Q5TCU4;Q5TCU7;Q9UH67
174938000	53675900	307382000	2429670	1924310	507194	FALSE		-2,36E+18	NaN	NaN	NaN	0	240,765	93	25	354	25	201	22,6	8,84	36056,8	472,42	22	25	Q01995	Transgelin OS=Homo sapiens OX=9606 GN=TAGLN PE=1 SV=4	0	Pf00307, Pf00402	6876	ENSG00000149591	TAGLN	hsa:6876;O15542;Q01995
151825000	73168300	237358000	3530340	220736	75856,3	FALSE		3,22E+18	NaN	NaN	NaN	0	240,023	60	25	208	25	439	49,1	6,1	20290,5	368,7	16	25	Q08629	Testican-1 OS=Homo sapiens OX=9606 GN=SPOCK1 PE=1 SV=1	0	Pf00086, Pf07648, Pf10591	6695	ENSG00000152377	SPOCK1	B3KSW3;hsa:6695;Q08629;Q59EW0;Q8N630;Q9UCL8
77016100	275889000	156927000	195014	858753	1051040	FALSE		-6,82E+18	NaN	NaN	NaN	0	238,703	63	26	269	25	359	39,7	8,54	29568,2	405,53	18	26	P07585	Decorin OS=Homo sapiens OX=9606 GN=DCN PE=1 SV=1	0	Pf01462, Pf13855	1634	ENSG00000011465	DCN	hsa:1634;P07585;Q9P0Z0;Q9P0Z1;Q9Y5N8;Q9Y5N9
31387100	128121000	91082000	14831200	30134500	7791450	FALSE		2,21E+18	NaN	NaN	NaN	0	238,581	73	31	433	11	284	32,7	4,74	52209,9	569,02	30	31	P09493	Tropomyosin alpha-1 chain OS=Homo sapiens OX=9606 GN=TPM1 PE=1 SV=2	14	Pf00261	7168	ENSG00000140416	TPM1	B7Z5T7;D9YZV2;D9YZV3;D9YZV8;hsa:7168;P09493;P09494;P10469;Q6DV89;Q6DV90;Q7Z6L8;Q86W64;Q96IK2;Q9UCI1;Q9UCI2;Q9UCY9;Q9Y427
7446980	4640210	6068620	26129900	37130600	428334	FALSE		-8,17E+18	NaN	NaN	NaN	0	238,328	58	34	230	34	934	104,7	6,76	21206,5	376,16	22	34	P13671	Complement component C6 OS=Homo sapiens OX=9606 GN=C6 PE=1 SV=3	0	Pf00057, Pf00084, Pf00090, Pf01823	729	ENSG00000039537	C6	hsa:729;P13671
45373600	33616100	118006000	402368	858897	284759	FALSE		5,77E+18	NaN	NaN	NaN	0	237,887	42	26	162	26	796	87,9	4,91	15653,6	339,35	14	26	P55287	Cadherin-11 OS=Homo sapiens OX=9606 GN=CDH11 PE=1 SV=2	0	Pf00028, Pf01049	1009	ENSG00000140937	CDH11	A8K5D6;A8MZC8;B7WP28;hsa:1009;P55287;Q15065;Q15066;Q9UQ93;Q9UQ94
4817520	2853250	5325860	29163200	40617700	1330560	FALSE		-2,03E+18	NaN	NaN	NaN	0	236,21	25	43	251	43	2224	251,5	6,05	25936	286,51	39	43	P12259	Coagulation factor V OS=Homo sapiens OX=9606 GN=F5 PE=1 SV=4	0	Pf00754, Pf07732	2153	ENSG00000198734	F5	A8K6E8;hsa:2153;P12259;Q14285;Q2EHR5;Q5R346;Q5R347;Q6UPU6;Q8WWQ6
28721,7	NaN	17559,8	120431	1836240	NaN	FALSE		-7,83E+18	NaN	NaN	NaN	0	234,741	42	23	1348	1	576	63,4	7,87	155927	1942,67	18	23	P0DOX6	Immunoglobulin mu heavy chain OS=Homo sapiens OX=9606 PE=1 SV=2	1	Pf07654, Pf07686
250056000	241420000	304916000	90388600	98067600	43313300	FALSE		6,22E+18	NaN	NaN	NaN	0	234,313	68	24	773	24	216	23,7	9,41	79081,7	912,59	20	24	P23284	Peptidyl-prolyl cis-trans isomerase B OS=Homo sapiens OX=9606 GN=PPIB PE=1 SV=2	0	Pf00160	5479	ENSG00000166794	PPIB	A8K534;hsa:5479;P23284;Q6IBH5;Q9BVK5
187405	425548	255152	71178100	71981100	26291600	FALSE		5,68E+18	NaN	NaN	NaN	0	232,457	42	32	196	32	830	90,8	6,6	23970,9	321,17	25	32	P16109	P-selectin OS=Homo sapiens OX=9606 GN=SELP PE=1 SV=3	0	Pf00059, Pf00084	6403	ENSG00000174175	SELP	hsa:6403;P16109;Q5R344;Q8IVD1
15239400	19441700	22084400	23355000	12980000	3596570	FALSE		2,75E+18	NaN	NaN	NaN	0	231,664	62	32	227	19	641	70	5,66	23915,2	403,16	21	32	P0DMV9	Heat shock 70 kDa protein 1B OS=Homo sapiens OX=9606 GN=HSPA1B PE=1 SV=1	8	Pf00012	3303;3304	ENSG00000204388;ENSG00000212866;ENSG00000224501;ENSG00000231555;ENSG00000232804	HSPA1B	B4E3B6;hsa:3303;hsa:3304;P08107;P0DMV9;P19790;Q5JQI4;Q5SP17;Q9UQL9;Q9UQM0
1536400	209206	2024510	38345200	57986200	3789480	FALSE		3,07E+18	NaN	NaN	NaN	0	231,262	38	31	219	31	1039	113,3	5,38	23014,2	330,94	24	31	P08514	Integrin alpha-IIb OS=Homo sapiens OX=9606 GN=ITGA2B PE=1 SV=3	0	Pf00357, Pf01839, Pf08441	3674	ENSG00000005961	ITGA2B	B2RCY8;hsa:3674;O95366;P08514;Q14443;Q17R67
15678600	19271500	61590500	NaN	79286,9	40626,2	FALSE		-8,99E+18	NaN	NaN	NaN	0	230,641	58	27	158	27	426	47,4	8,03	18910,7	287,43	22	27	P08476	Inhibin beta A chain OS=Homo sapiens OX=9606 GN=INHBA PE=1 SV=2	0	Pf00019, Pf00688	3624	ENSG00000122641	INHBA	hsa:3624;P08476;Q14599
1839820	68271,8	2185880	225595	23115400	52982,5	FALSE		5,35E+18	NaN	NaN	NaN	0	228,696	34	36	373	25	1482	163,8	6,38	33444,1	433,57	28	36	P20742	Pregnancy zone protein OS=Homo sapiens OX=9606 GN=PZP PE=1 SV=4	1	Pf00207, Pf01835, Pf07677, Pf07678, Pf07703, Pf17789, Pf17791		ENSG00000126838	PZP	A6ND27;P20742;Q15273;Q2NKL2;Q7M4N7
26918200	17503300	32982500	5801760	2656950	538937	FALSE	Acetyl [N-Term];Met-loss+Acetyl [N-Term]	-2,1E+18	NaN	NaN	NaN	0	227,067	78	28	183	28	461	49,9	4,82	18574	330,6	15	27	P13489	Ribonuclease inhibitor OS=Homo sapiens OX=9606 GN=RNH1 PE=1 SV=2	0	Pf13516, Pf18779	6050	ENSG00000023191;ENSG00000276230	RNH1	hsa:6050;P13489;Q8IZK8;Q96FD7;Q9BQ80;Q9UDK6
105756000	122421000	119135000	45334600	31124200	23887300	FALSE		-1,61E+17	NaN	NaN	NaN	0	225,476	63	27	471	26	334	36,6	6,05	53226,7	618,26	22	27	P07195	L-lactate dehydrogenase B chain OS=Homo sapiens OX=9606 GN=LDHB PE=1 SV=2	0	Pf00056, Pf02866	3945	ENSG00000111716	LDHB	hsa:3945;P07195
16369500	1276500	28499300	27666900	15705800	151537	FALSE		3,35E+18	NaN	NaN	NaN	0	225,324	38	30	279	30	1016	106,6	5,17	30703,3	482,95	23	30	Q9Y6C2	EMILIN-1 OS=Homo sapiens OX=9606 GN=EMILIN1 PE=1 SV=3	0	Pf00386, Pf01391, Pf07546	11117	ENSG00000138080	EMILIN1	A0A0C4DFX3;A5PL03;H0Y7A0;hsa:11117;Q53SY9;Q96G58;Q96IH6;Q9UG76;Q9Y6C2
12852900	4396160	7523350	2198180	950230	69013,3	FALSE		7,13E+18	NaN	NaN	NaN	0	223,18	21	32	110	32	2803	305,3	4,92	8382,76	194,92	16	32	P78559	Microtubule-associated protein 1A OS=Homo sapiens OX=9606 GN=MAP1A PE=1 SV=6	0		4130	ENSG00000166963	MAP1A	hsa:4130;O95643;P78559;Q12973;Q15882;Q9UJT4
62688300	41374800	84837800	69014700	113010000	2115510	FALSE	Acetyl [N-Term];Met-loss+Acetyl [N-Term]	3,94E+18	NaN	NaN	NaN	0	221,791	100	19	329	19	151	16,9	4,65	31547,7	374,24	13	18	P60660	Myosin light polypeptide 6 OS=Homo sapiens OX=9606 GN=MYL6 PE=1 SV=2	0		4637	ENSG00000092841	MYL6	hsa:4637;P16475;P24572;P24573;P60660;Q12790;Q561V9;Q6IAZ0;Q6IPY5
41179500	32487000	210042000	31237200	39742000	5960900	FALSE		-1,46E+17	NaN	NaN	NaN	0	221,278	50	19	323	19	493	54,6	5,07	36249,9	582,09	15	19	Q12805	EGF-containing fibulin-like extracellular matrix protein 1 OS=Homo sapiens OX=9606 GN=EFEMP1 PE=1 SV=2	0	Pf07645, Pf12662	2202	ENSG00000115380	EFEMP1	A8K3I4;B4DW75;D6W5D2;hsa:2202;Q12805;Q541U7
2136170	18397000	10108500	535740	1034270	42004,3	FALSE		-7,57E+18	NaN	NaN	NaN	0	221,165	42	28	94	28	1193	130,9	6,19	10987,6	155,4	18	28	Q13753	Laminin subunit gamma-2 OS=Homo sapiens OX=9606 GN=LAMC2 PE=1 SV=2	0	Pf00052, Pf00053	3918	ENSG00000058085	LAMC2	hsa:3918;Q02536;Q02537;Q13752;Q13753;Q14941;Q14DF7;Q2M1N2;Q5VYE8
153380000	136603000	269503000	68097100	60143900	1775820	FALSE		6,75E+18	NaN	NaN	NaN	0	220,955	52	22	1224	1	377	42	5,39	137917	1196,28	13	22	P68032	Actin, alpha cardiac muscle 1 OS=Homo sapiens OX=9606 GN=ACTC1 PE=1 SV=1	8	Pf00022	70	ENSG00000159251	ACTC1	hsa:70;P04270;P68032
47258600	236970000	85575600	66609600	104849000	2749510	FALSE	Acetyl [N-Term];Met-loss+Acetyl [N-Term]	-1,54E+18	NaN	NaN	NaN	0	220,394	79	22	332	17	166	18,5	8,09	39449,9	476,4	19	21	P23528	Cofilin-1 OS=Homo sapiens OX=9606 GN=CFL1 PE=1 SV=3	6	Pf00241	1072	ENSG00000172757	CFL1	B3KUQ1;hsa:1072;P23528;Q53Y87;Q9UCA2
46342600	38013900	51591800	225009	139179	24904,4	FALSE		8,17E+18	NaN	NaN	NaN	0	220,392	74	21	173	21	331	38,9	5	17210,1	354,75	12	21	Q15293	Reticulocalbin-1 OS=Homo sapiens OX=9606 GN=RCN1 PE=1 SV=1	0	Pf13202	5954	ENSG00000049449	RCN1	B7Z1M1;D3DR00;hsa:5954;Q15293
33790300	33615400	31647900	100571000	130733000	3679400	FALSE		-1,62E+18	NaN	NaN	NaN	0	218,497	57	27	329	23	464	52,6	6,71	34254,5	464,13	20	27	P01008	Antithrombin-III OS=Homo sapiens OX=9606 GN=SERPINC1 PE=1 SV=1	4	Pf00079	462	ENSG00000117601	SERPINC1	B2R6P0;hsa:462;P01008;P78439;P78447;Q13815;Q5TC78;Q7KZ43;Q7KZ97;Q9UC78
18428700	72161300	31248500	3457,06	487656	1159380	FALSE	Met-loss+Acetyl [N-Term]	-7,08E+18	NaN	NaN	NaN	0	217,748	71	27	163	27	493	54,5	7,24	14305,1	284,29	17	27	Q16658	Fascin OS=Homo sapiens OX=9606 GN=FSCN1 PE=1 SV=3	0	Pf06268	6624	ENSG00000075618	FSCN1	A6NI89;B2RE97;hsa:6624;Q16658;Q96IC5;Q96IH1;Q9BRF1
2781180	2960800	2906690	80733900	80767600	35777400	FALSE		7,59E+18	NaN	NaN	NaN	0	217,501	59	24	237	22	565	61,8	5,15	21891,3	366,39	17	24	Q9UBW5	Bridging integrator 2 OS=Homo sapiens OX=9606 GN=BIN2 PE=1 SV=3	1	Pf03114	51411	ENSG00000110934	BIN2	B7Z6F3;F5H0W4;hsa:51411;Q86VV0;Q9NWK4;Q9UBW5;Q9UKN4
15820800	15136100	34413000	11151300	22422800	114631	FALSE		2,02E+18	NaN	NaN	NaN	0	217,475	43	34	209	34	1101	120,8	7,33	20373	309,49	26	34	P53396	ATP-citrate synthase OS=Homo sapiens OX=9606 GN=ACLY PE=1 SV=3	0	Pf00285, Pf00549, Pf02629, Pf16114	47	ENSG00000131473	ACLY	B4DIM0;B4E3P0;hsa:47;P53396;Q13037;Q9BRL0
23694200	71366900	67151800	145662	371128	3053980	FALSE		-8,42E+18	NaN	NaN	NaN	0	217,264	56	29	154	29	480	53,7	7,28	13838,3	272,71	20	28	O43854	EGF-like repeat and discoidin I-like domain-containing protein 3 OS=Homo sapiens OX=9606 GN=EDIL3 PE=1 SV=1	0	Pf00008, Pf00754, Pf12661	10085	ENSG00000164176	EDIL3	B2R763;hsa:10085;O43854;O43855;Q5D094;Q8N610
8385930	11377400	11223000	241615000	147184000	31847100	FALSE	Acetyl [N-Term];Met-loss+Acetyl [N-Term]	-9,18E+17	NaN	NaN	NaN	0	214,555	83	20	277	20	201	23	5,21	28880,5	457,39	13	19	P52566	Rho GDP-dissociation inhibitor 2 OS=Homo sapiens OX=9606 GN=ARHGDIB PE=1 SV=3	0	Pf02115	397	ENSG00000111348	ARHGDIB	B5BU79;hsa:397;P52566
50917700	33191700	103833000	7521610	7194970	1262430	FALSE		-8,07E+17	NaN	NaN	NaN	0	214,318	73	26	263	1	451	50,1	5,06	23468,4	435,79	16	26	Q71U36	Tubulin alpha-1A chain OS=Homo sapiens OX=9606 GN=TUBA1A PE=1 SV=1	28	Pf00091, Pf03953	7846	ENSG00000167552	TUBA1A	A8K0B8;G3V1U9;hsa:7846;P04687;P05209;Q71U36
424053000	60272200	424469000	63970600	60309900	3897890	FALSE	Acetyl [N-Term];Met-loss [N-Term]	8,29E+18	NaN	NaN	NaN	0	212,65	74	26	762	24	255	29,2	4,74	85907,5	823,95	22	26	P62258	14-3-3 protein epsilon OS=Homo sapiens OX=9606 GN=YWHAE PE=1 SV=1	3	Pf00244	7531	ENSG00000108953;ENSG00000274474	YWHAE	B3KY71;D3DTH5;hsa:7531;P29360;P42655;P62258;Q4VJB6;Q53XZ5;Q63631;Q7M4R4
15935500	13700900	14679900	2081680	1828410	2752560	FALSE		3,99E+18	NaN	NaN	NaN	0	211,983	47	33	188	33	919	103,2	5,72	15885	260,34	23	33	P55786	Puromycin-sensitive aminopeptidase OS=Homo sapiens OX=9606 GN=NPEPPS PE=1 SV=2	0	Pf01433, Pf11838, Pf17900	9520	ENSG00000141279	NPEPPS	B7Z463;hsa:9520;P55786;Q6P145;Q9NP16;Q9UEM2
NaN	738424	NaN	NaN	NaN	NaN	FALSE		-6,53E+18	NaN	NaN	NaN	0	211,481	52	21	1214	1	376	41,9	5,48	136870	1183,21	12	21	P63267	Actin, gamma-enteric smooth muscle OS=Homo sapiens OX=9606 GN=ACTG2 PE=1 SV=1	0	Pf00022	72	ENSG00000163017	ACTG2	B2R7E7;B4E315;D6W5H8;E9PG30;hsa:72;P12718;P63267;Q504R1;Q6FI22
8526030	7860780	13374400	206353	85641,1	159492	FALSE		1,16E+18	NaN	NaN	NaN	0	210,073	39	37	156	37	1512	170,5	7,33	14458,8	179,79	25	37	P07814	Bifunctional glutamate/proline--tRNA ligase OS=Homo sapiens OX=9606 GN=EPRS1 PE=1 SV=5	0	Pf00043, Pf00458, Pf00587, Pf00749, Pf03129, Pf03950, Pf09180	2058	ENSG00000136628	EPRS1	A0AVA9;B9EGH3;hsa:2058;P07814;Q05BP6;Q05DF8;Q5DSM1;Q5H9S5;Q6PD57;Q86X73
392453000	244873000	348001000	424140000	409969000	56358400	FALSE	Met-loss+Acetyl [N-Term]	1,52E+18	NaN	NaN	NaN	0	209,668	100	15	1251	15	140	15	8,27	121212	1133	12	15	P07737	Profilin-1 OS=Homo sapiens OX=9606 GN=PFN1 PE=1 SV=2	0	Pf00235	5216	ENSG00000108518	PFN1	hsa:5216;P07737;Q53Y44
12792200	22799900	26791900	1215040	166415	79517,5	FALSE		2,8E+18	NaN	NaN	NaN	0	208,903	50	32	162	32	737	84,6	6,71	16034,8	203,15	24	32	O00469	Procollagen-lysine,2-oxoglutarate 5-dioxygenase 2 OS=Homo sapiens OX=9606 GN=PLOD2 PE=1 SV=2	0	Pf03171	5352	ENSG00000152952	PLOD2	B3KWS3;hsa:5352;O00469;Q59ED2;Q8N170
321510	48044,6	2210800	98847300	61754400	133366	FALSE		-9,12E+18	NaN	NaN	NaN	0	208,613	53	34	272	30	745	83,8	8,97	29348,4	346,34	30	34	P05164	Myeloperoxidase OS=Homo sapiens OX=9606 GN=MPO PE=1 SV=1	4	Pf03098	4353	ENSG00000005381	MPO	A1L4B8;hsa:4353;P05164;Q14862;Q4PJH5;Q9UCL7
248050	196501	439667	NaN	NaN	1684,93	FALSE	Met-loss [N-Term]	8,25E+18	NaN	NaN	NaN	0	208,406	60	19	203	3	445	49,9	4,89	27505,8	357,05	14	17	Q9BVA1	Tubulin beta-2B chain OS=Homo sapiens OX=9606 GN=TUBB2B PE=1 SV=1	0	Pf00091, Pf03953	347733	ENSG00000137285	TUBB2B	A8K068;hsa:347733;Q9BVA1
11567800	10927100	32938300	6488430	8483830	1186570	FALSE		7,47E+18	NaN	NaN	NaN	0	208,257	55	29	252	29	748	84,1	7,77	25304,2	405,62	21	29	O14672	Disintegrin and metalloproteinase domain-containing protein 10 OS=Homo sapiens OX=9606 GN=ADAM10 PE=1 SV=1	0	Pf00200, Pf01562, Pf13574	102	ENSG00000137845	ADAM10	B4DU28;hsa:102;O14672;Q10742;Q92650
115011000	98598900	175931000	25096,4	67533,5	80831,6	FALSE		-5,61E+18	NaN	NaN	NaN	0	206,991	59	19	218	19	282	29,1	7,9	27249,4	396,84	13	19	Q16270	Insulin-like growth factor-binding protein 7 OS=Homo sapiens OX=9606 GN=IGFBP7 PE=1 SV=1	0	Pf00219, Pf07648, Pf07679	3490	ENSG00000163453	IGFBP7	B4E1N2;B7Z9W7;hsa:3490;Q07822;Q16270;Q53YE6;Q9UCA8
77057800	7619880	75696500	NaN	120645	40697,5	FALSE		-6,91E+18	NaN	NaN	NaN	0	206,733	70	15	157	15	328	37,5	4,89	12819,3	371,09	8	15	Q96D15	Reticulocalbin-3 OS=Homo sapiens OX=9606 GN=RCN3 PE=1 SV=1	0	Pf13202	57333	ENSG00000142552	RCN3	hsa:57333;Q96D15;Q9HBZ8
90068200	35215800	70200700	1250460	317310	107199	FALSE		-3,57E+18	NaN	NaN	NaN	0	206,56	68	23	179	23	349	38,1	8	17732,2	293,55	15	23	P29279	CCN family member 2 OS=Homo sapiens OX=9606 GN=CCN2 PE=1 SV=2	0	Pf00007, Pf00093, Pf00219, Pf19035	1490	ENSG00000118523	CCN2	E1P578;hsa:1490;P29279;Q6LCY0;Q96A79;Q96QX2;Q9UDL6
21258900	12832500	32409000	21652200	45003800	473104	FALSE		3,18E+18	NaN	NaN	NaN	0	206,555	44	18	197	18	572	61,2	6,67	23447,8	385,52	11	18	Q15942	Zyxin OS=Homo sapiens OX=9606 GN=ZYX PE=1 SV=1	0	Pf00412	7791	ENSG00000159840;ENSG00000285443	ZYX	A4D2G6;B4DQX7;hsa:7791;Q15942;Q6I9S4
78114800	45371000	75065100	187127000	107684000	17043900	FALSE	Acetyl [N-Term];Met-loss+Acetyl [N-Term]	8,48E+18	NaN	NaN	NaN	0	206,5	97	24	429	24	199	22,4	8,25	44517,5	621,93	20	22	P37802	Transgelin-2 OS=Homo sapiens OX=9606 GN=TAGLN2 PE=1 SV=3	0	Pf00307, Pf00402	8407	ENSG00000158710	TAGLN2	E9KL39;hsa:8407;P37802;Q5JRQ6;Q5JRQ7;Q6FGI1;Q9BUH5;Q9H4P0
43734400	38446700	57237300	2950180	3664330	424664	FALSE	Acetyl [N-Term];Met-loss+Acetyl [N-Term]	-3,01E+18	NaN	NaN	NaN	0	206,33	86	25	198	25	253	28,8	5,59	19100,2	318,81	17	24	Q9Y696	Chloride intracellular channel protein 4 OS=Homo sapiens OX=9606 GN=CLIC4 PE=1 SV=4	0	Pf13410	25932	ENSG00000169504	CLIC4	hsa:25932;Q9UFW9;Q9UQJ6;Q9Y696
4458280	8429500	6268130	50542600	65794800	13116100	FALSE	Acetyl [N-Term];Met-loss+Acetyl [N-Term]	2,04E+18	NaN	NaN	NaN	0	205,542	83	23	222	23	329	36	7,02	24611,2	371,73	17	22	O00151	PDZ and LIM domain protein 1 OS=Homo sapiens OX=9606 GN=PDLIM1 PE=1 SV=4	0	Pf00412, Pf00595, Pf15936	9124	ENSG00000107438	PDLIM1	B2RBS6;hsa:9124;O00151;Q5VZH5;Q9BPZ9
29173200	94177400	107710000	250751	87891	70792100	FALSE		-5,24E+18	NaN	NaN	NaN	0	204,072	31	23	186	23	906	99,7	4,81	15535,7	347,04	12	23	P19022	Cadherin-2 OS=Homo sapiens OX=9606 GN=CDH2 PE=1 SV=4	0	Pf00028, Pf01049, Pf08758	1000	ENSG00000170558	CDH2	A8MWK3;B0YIY6;hsa:1000;P19022;Q14923;Q8N173
22174300	8968620	21775300	117401000	201691000	9057660	FALSE		-1,8E+18	NaN	NaN	NaN	0	203,841	58	17	351	16	495	54,2	5,86	31985,4	583,27	12	17	P04217	Alpha-1B-glycoprotein OS=Homo sapiens OX=9606 GN=A1BG PE=1 SV=4	1	Pf13895	1	ENSG00000121410	A1BG	A8K052;hsa:1;P04217;Q68CK0;Q8IYJ6;Q96P39
15385300	18584000	27902900	95044,8	114816	95178,2	FALSE		7,88E+18	NaN	NaN	NaN	0	203,777	38	28	145	28	959	107,5	9,22	16147,8	237,06	21	28	Q86Y38	Xylosyltransferase 1 OS=Homo sapiens OX=9606 GN=XYLT1 PE=1 SV=1	0	Pf02485, Pf12529	64131	ENSG00000103489	XYLT1	hsa:64131;Q86Y38;Q9H1B6
25872500	13844900	47878100	16736800	11420100	4843950	FALSE		7,63E+18	NaN	NaN	NaN	0	202,838	57	24	173	24	528	59,4	4,41	18388,9	370,89	14	24	P14314	Glucosidase 2 subunit beta OS=Homo sapiens OX=9606 GN=PRKCSH PE=1 SV=2	0	Pf12999, Pf13015, Pf13202	5589	ENSG00000130175	PRKCSH	A8K318;hsa:5589;P14314;Q96BU9;Q96D06;Q9P0W9
79815400	65551200	95094800	32459400	36763000	6054930	FALSE		4,06E+18	NaN	NaN	NaN	0	202,626	75	23	325	20	199	22,1	8,13	27955,6	512,8	17	23	Q06830	Peroxiredoxin-1 OS=Homo sapiens OX=9606 GN=PRDX1 PE=1 SV=1	3	Pf00578, Pf10417	5052	ENSG00000117450	PRDX1	B5BU26;D3DPZ8;hsa:5052;P35703;Q06830;Q2V576;Q5T154;Q5T155
148326000	219062000	478956000	68454600	103236000	3591530	FALSE		7,57E+18	NaN	NaN	NaN	0	202,255	36	19	421	19	449	52,5	6,27	39996,9	597,95	15	19	P10909	Clusterin OS=Homo sapiens OX=9606 GN=CLU PE=1 SV=1	0	Pf01093	1191	ENSG00000120885	CLU	B2R9Q1;B3KSE6;hsa:1191;P10909;P11380;P11381;Q2TU75;Q5HYC1;Q7Z5B9
53894200	117918000	63318900	574109000	661386000	179017000	FALSE		4,55E+18	NaN	NaN	NaN	0	201,478	60	12	499	2	214	23,4	7,17	62198,2	797,02	10	12	P0DOX7	Immunoglobulin kappa light chain OS=Homo sapiens OX=9606 PE=1 SV=1	10	Pf07654, Pf07686
12042000	5911630	44938200	252558	356141	156493	FALSE		-8,07E+18	NaN	NaN	NaN	0	200,752	22	27	128	27	1894	205,4	9,32	10728,5	222,66	15	26	Q4ZHG4	Fibronectin type III domain-containing protein 1 OS=Homo sapiens OX=9606 GN=FNDC1 PE=2 SV=4	0	Pf00041	84624	ENSG00000164694	FNDC1	A6H8X2;B7ZBR4;B7ZBR5;B9EK49;hsa:84624;Q4ZHG4;Q5JPI0;Q5VU31;Q5VU32;Q5VXX4;Q70CQ6;Q96JG1
16905500	37278700	28267200	1894340	1200170	64283,5	FALSE		-3,92E+17	NaN	NaN	NaN	0	199,405	37	26	147	26	955	106,9	5,39	15008,2	216,6	15	26	Q9H4D0	Calsyntenin-2 OS=Homo sapiens OX=9606 GN=CLSTN2 PE=1 SV=2	0	Pf00028, Pf19699	64084	ENSG00000158258	CLSTN2	B2RCW5;D3DNF4;hsa:64084;Q3SX54;Q3ZB76;Q5UE56;Q96HZ2;Q9BSS0;Q9H4D0
1155820	865681	1094970	89125700	74815800	31848000	FALSE	Acetyl [N-Term];Met-loss+Acetyl [N-Term]	7,75E+18	NaN	NaN	NaN	0	199,207	77	21	179	21	260	29,2	7,4	18995,6	326,28	14	20	P00918	Carbonic anhydrase 2 OS=Homo sapiens OX=9606 GN=CA2 PE=1 SV=2	0	Pf00194	760	ENSG00000104267	CA2	B2R7G8;hsa:760;P00918;Q6FI12;Q96ET9
5857090	6529890	3466700	19647600	11110600	1045180	FALSE	Acetyl [N-Term];Met-loss+Acetyl [N-Term]	5,35E+18	NaN	NaN	NaN	0	199,188	49	42	280	37	847	97,1	7,17	30161,3	272,01	38	41	P06737	Glycogen phosphorylase, liver form OS=Homo sapiens OX=9606 GN=PYGL PE=1 SV=4	5	Pf00343	5836	ENSG00000100504	PYGL	A6NDQ4;B4DUB7;F5H816;hsa:5836;O60567;O60752;O60913;P06737;Q501V9;Q641R5;Q96G82
29550600	36260500	15034100	60446,9	30047,8	9796,15	FALSE		4,14E+18	NaN	NaN	NaN	0	198,059	54	26	150	26	469	54	6,96	16899,7	209,54	23	26	P03956	Interstitial collagenase OS=Homo sapiens OX=9606 GN=MMP1 PE=1 SV=3	0	Pf00045, Pf00413, Pf01471	4312	ENSG00000196611	MMP1	hsa:4312;P03956;P08156
23186500	5988580	33307600	41109400	40547800	20730000	FALSE		-6,71E+18	NaN	NaN	NaN	0	197,73	70	22	202	22	350	40,1	8,28	16796,5	379,63	8	22	P08567	Pleckstrin OS=Homo sapiens OX=9606 GN=PLEK PE=1 SV=3	0	Pf00169, Pf00610	5341	ENSG00000115956	PLEK	B2R9E8;hsa:5341;P08567;Q53SU8;Q6FGM8;Q6FGQ1;Q8WV81
19840600	1097600	19710900	130359000	140190000	5118890	FALSE		-5,38E+18	NaN	NaN	NaN	0	197,239	93	11	641	2	107	11,8	6,52	81835,3	1048,49	9	11	P01834	Immunoglobulin kappa constant OS=Homo sapiens OX=9606 GN=IGKC PE=1 SV=2	0	Pf07654			IGKC	A0A075B6H6;A0A087X130;P01834
14447900	17766600	20502900	2986870	2186070	614649	FALSE	Met-loss [N-Term]	-6,83E+18	NaN	NaN	NaN	0	195,453	62	22	161	22	471	53,1	6,23	15547,8	263,54	16	22	P23381	Tryptophan--tRNA ligase, cytoplasmic OS=Homo sapiens OX=9606 GN=WARS1 PE=1 SV=2	0	Pf00458, Pf00579	7453	ENSG00000140105	WARS1	A6NGN1;A6NID3;hsa:7453;P23381;P78535;Q502Y0;Q53XB6;Q9UDI5;Q9UDL3
75140100	173994000	91410800	175376000	357549000	27370300	FALSE		-7,73E+18	NaN	NaN	NaN	0	195,149	52	14	289	12	367	39,3	5,72	32090,8	697,32	8	14	P02765	Alpha-2-HS-glycoprotein OS=Homo sapiens OX=9606 GN=AHSG PE=1 SV=2	1	Pf00031	197	ENSG00000145192	AHSG	A8K9N6;B2R7G1;hsa:197;O14961;O14962;P02765;Q9P152
14759700	6723180	15416500	2439910	1576350	693283	FALSE		-5,65E+18	NaN	NaN	NaN	0	195,147	59	24	184	21	572	62,3	6,38	22285,3	333,6	16	24	Q16555	Dihydropyrimidinase-related protein 2 OS=Homo sapiens OX=9606 GN=DPYSL2 PE=1 SV=1	0	Pf01979	1808	ENSG00000092964	DPYSL2	A8K5H2;B4DR31;D3DSS7;hsa:1808;O00424;Q16555
11404,7	73518	21027,5	59731100	78204500	33274100	FALSE	Acetyl [N-Term];Met-loss+Acetyl [N-Term]	-8,02E+18	NaN	NaN	NaN	0	195,077	99	19	944	10	147	16	8,05	99098,7	1097,41	13	18	P02042	Hemoglobin subunit delta OS=Homo sapiens OX=9606 GN=HBD PE=1 SV=2	0	Pf00042	3045	ENSG00000223609	HBD	hsa:3045;P02042;Q3Y5H3;Q8WXT7
7728880	7457420	21245600	110690	186906	424443	FALSE		1,79E+18	NaN	NaN	NaN	0	194,865	36	37	155	37	1361	152,9	7,85	15061,1	220,11	26	37	Q8WUJ3	Cell migration-inducing and hyaluronan-binding protein OS=Homo sapiens OX=9606 GN=CEMIP PE=1 SV=2	0	Pf10162, Pf13330, Pf15711	57214	ENSG00000103888	CEMIP	hsa:57214;Q6L9J5;Q8WUJ3;Q9H1K5;Q9NPN9;Q9ULM1
8301140	11817000	14781200	628468	738794	93513,6	FALSE		3E+18	NaN	NaN	NaN	0	194,666	63	27	120	27	535	57,5	6,46	11493,7	172,88	19	27	P78371	T-complex protein 1 subunit beta OS=Homo sapiens OX=9606 GN=CCT2 PE=1 SV=4	0	Pf00118	10576	ENSG00000166226	CCT2	A8K402;B5BTY7;B7Z243;B7Z7K4;B7ZAT2;hsa:10576;P78371;Q14D36;Q6IAT3
18555200	18076800	21808800	58700000	53002600	8984790	FALSE		-6,02E+18	NaN	NaN	NaN	0	194,499	49	25	284	25	676	75,1	5,67	32836,1	449,22	19	25	P07225	Vitamin K-dependent protein S OS=Homo sapiens OX=9606 GN=PROS1 PE=1 SV=1	0	Pf00008, Pf00054, Pf00594, Pf02210, Pf07645, Pf14670	5627	ENSG00000184500	PROS1	A8KAC9;D3DN28;hsa:5627;P07225;Q15518;Q7Z715;Q9UCZ8
7816490	11819100	27625100	1883560	943835	1746550	FALSE		-2,3E+18	NaN	NaN	NaN	0	194,184	40	34	128	34	986	111,2	6,9	11638,6	185,23	24	34	P13497	Bone morphogenetic protein 1 OS=Homo sapiens OX=9606 GN=BMP1 PE=1 SV=2	0	Pf00431, Pf01400, Pf07645, Pf14670	649	ENSG00000168487	BMP1	A8K6F5;B2RN46;D3DSR0;hsa:649;P13497;Q13292;Q13872;Q14874;Q99421;Q99422;Q99423;Q9UL38
28535000	11607100	25733000	3113030	1385960	NaN	FALSE		-8,72E+18	NaN	NaN	NaN	0	193,806	63	17	112	17	318	35,5	8,12	15230,3	248,17	12	17	P27695	DNA-(apurinic or apyrimidinic site) endonuclease OS=Homo sapiens OX=9606 GN=APEX1 PE=1 SV=2	0	Pf03372	328	ENSG00000100823	APEX1	hsa:328;P27695;Q969L5;Q99775
8604360	5492060	10594900	746384	1194920	68008,9	TRUE		-3,62E+17	NaN	NaN	NaN	0	193,658	35	31	303	24	1477	164,2	6,02	26605,4	381,08	22	31	ENSEMBL:ENSBTAP00000024146	(Bos taurus) similar to alpha-2-macroglobulin isoform 1	0
428800000	95437500	484750000	4520530	4351720	585972	FALSE	Acetyl [N-Term];Met-loss [N-Term];Met-loss+Acetyl [N-Term]	-7,12E+18	NaN	NaN	NaN	0	193,65	95	15	279	15	135	14,7	5,5	29443,4	341,31	10	14	P09382	Galectin-1 OS=Homo sapiens OX=9606 GN=LGALS1 PE=1 SV=2	0	Pf00337	3956	ENSG00000100097	LGALS1	B2R5E8;hsa:3956;P09382;Q9UDK5
45353600	17010100	30754700	845005	1221460	302938	FALSE		-7,08E+18	NaN	NaN	NaN	0	193,595	51	31	224	30	739	81,2	5,22	18759,6	326,99	22	31	P19320	Vascular cell adhesion protein 1 OS=Homo sapiens OX=9606 GN=VCAM1 PE=1 SV=1	1	Pf00047, Pf05790, Pf07679, Pf13927	7412	ENSG00000162692	VCAM1	A8K6R7;B4DKS4;E9PDD1;hsa:7412;P19320;Q6NUP8
2954190	3106910	2552950	13703800	26579000	1171740	FALSE		-1,39E+17	NaN	NaN	NaN	0	193,279	56	28	148	28	591	67	8,13	17483,8	200,82	19	28	P07358	Complement component C8 beta chain OS=Homo sapiens OX=9606 GN=C8B PE=1 SV=3	0	Pf00057, Pf00090, Pf01823	732	ENSG00000021852	C8B	A1L4K7;hsa:732;P07358
13796500	9451080	32911700	NaN	178431	38180,6	FALSE		-2,92E+18	NaN	NaN	NaN	0	193,234	69	27	132	27	471	53,8	5,6	12998,1	210,61	19	26	P45452	Collagenase 3 OS=Homo sapiens OX=9606 GN=MMP13 PE=1 SV=1	0	Pf00045, Pf00413, Pf01471	4322	ENSG00000137745	MMP13	A8K846;B2RCZ3;hsa:4322;P45452;Q6NWN6
53960,6	509720	101708	63379400	52096600	23355200	FALSE	Acetyl [N-Term];Met-loss+Acetyl [N-Term]	4,86E+17	NaN	NaN	NaN	0	191,819	76	20	178	20	261	28,9	7,12	17335,4	270,1	12	18	P00915	Carbonic anhydrase 1 OS=Homo sapiens OX=9606 GN=CA1 PE=1 SV=2	0	Pf00194	759	ENSG00000133742	CA1	hsa:759;P00915
73865700	19618500	117718000	89990800	82736200	2197330	FALSE		-6,9E+18	NaN	NaN	NaN	0	191,717	47	20	330	20	478	54,3	5,8	33573,3	606,59	14	20	P04004	Vitronectin OS=Homo sapiens OX=9606 GN=VTN PE=1 SV=1	0	Pf00045, Pf01033	7448	ENSG00000109072	VTN	B2R7G0;hsa:7448;P01141;P04004;Q9BSH7
5693230	7178390	10762500	526363	431313	106278	FALSE	Acetyl [N-Term]	3,49E+18	NaN	NaN	NaN	0	190,842	46	33	125	33	968	106,7	5,53	14050,3	163,44	25	33	P49588	Alanine--tRNA ligase, cytoplasmic OS=Homo sapiens OX=9606 GN=AARS1 PE=1 SV=2	0	Pf01411, Pf02272, Pf07973	16	ENSG00000090861	AARS1	A6NF14;B4DR45;hsa:16;P49588;Q53GV7;Q96FA0
21384500	13872100	30152900	33858300	32316000	4516040	FALSE		5,87E+18	NaN	NaN	NaN	0	190,777	65	24	328	24	440	48,1	5,08	31242,3	512,15	12	24	Q15084	Protein disulfide-isomerase A6 OS=Homo sapiens OX=9606 GN=PDIA6 PE=1 SV=1	0	Pf00085	10130	ENSG00000143870	PDIA6	B3KY95;B5MCQ5;B7Z254;B7Z4M8;F8WA83;hsa:10130;Q15084;Q53RC7;Q6ZSH5;Q99778
11737000	14369300	16423700	113471	69856,2	215303	FALSE		4,82E+18	NaN	NaN	NaN	0	190,488	21	28	128	28	2322	250,4	5,47	13409	247,39	19	28	Q6UVK1	Chondroitin sulfate proteoglycan 4 OS=Homo sapiens OX=9606 GN=CSPG4 PE=1 SV=2	0	Pf02210, Pf16184	1464	ENSG00000173546	CSPG4	D3DW77;hsa:1464;Q6UVK1;Q92675
1398130000	230238000	1410070000	20109700	17266300	2747160	FALSE		-6,09E+18	NaN	NaN	NaN	0	190,024	73	15	435	15	207	23,2	8,1	37003,3	828,12	8	15	P01033	Metalloproteinase inhibitor 1 OS=Homo sapiens OX=9606 GN=TIMP1 PE=1 SV=1	0	Pf00965	7076	ENSG00000102265	TIMP1	hsa:7076;P01033;Q14252;Q9UCU1
18979800	20170600	41218600	430605	577235	171770	FALSE		7,74E+18	NaN	NaN	NaN	0	189,966	50	29	174	29	739	83,1	7,03	15451,5	254,44	22	29	P41250	Glycine--tRNA ligase OS=Homo sapiens OX=9606 GN=GARS1 PE=1 SV=3	0	Pf00458, Pf00587, Pf03129	2617	ENSG00000106105	GARS1	A0A090N8G0;B3KQA2;B4DIA0;hsa:2617;P41250;Q969Y1
15965300	4761090	21014800	1696190	523045	115538	FALSE		-2,78E+18	NaN	NaN	NaN	0	189,696	54	28	147	28	700	79,9	4,98	13767,8	214,13	19	28	P17655	Calpain-2 catalytic subunit OS=Homo sapiens OX=9606 GN=CAPN2 PE=1 SV=6	0	Pf00648, Pf01067, Pf13833	824	ENSG00000162909	CAPN2	A6NDG7;B7ZA96;E7ES58;hsa:824;P17655;Q16738;Q6PJT3;Q8WU26;Q9HBB1
7617510	10570400	15663300	95825,1	396994	88668	FALSE		8,12E+18	NaN	NaN	NaN	0	189,286	42	27	131	27	923	103,1	5,88	12189	182,65	18	27	O14786	Neuropilin-1 OS=Homo sapiens OX=9606 GN=NRP1 PE=1 SV=3	0	Pf00431, Pf00629, Pf00754, Pf11980	8829	ENSG00000099250	NRP1	B0LPG9;hsa:8829;O14786;O60461;Q5T7F1;Q5T7F2;Q5T7F3;Q86T59;Q96I90;Q96IH5
5432120	19847500	10523400	5253,94	19026,1	NaN	FALSE	Acetyl [N-Term];Met-loss+Acetyl [N-Term]	-8,19E+18	NaN	NaN	NaN	0	188,877	76	22	98	22	279	32,2	7,55	9886,3	162,62	15	20	Q14192	Four and a half LIM domains protein 2 OS=Homo sapiens OX=9606 GN=FHL2 PE=1 SV=3	0	Pf00412	2274	ENSG00000115641	FHL2	hsa:2274;Q13229;Q13644;Q14192;Q2I5I4;Q5TM15;Q9P294
1204450	1327170	3012440	2479,53	6067,02	7908,36	FALSE	Met-loss [N-Term]	-6,5E+18	NaN	NaN	NaN	0	187,707	57	20	182	7	450	50,4	4,93	25553,3	283,97	15	19	Q13509	Tubulin beta-3 chain OS=Homo sapiens OX=9606 GN=TUBB3 PE=1 SV=2	2	Pf00091, Pf03953	10381	ENSG00000258947	TUBB3	A8K854;hsa:10381;Q13509;Q9BTZ0;Q9BW10
9562820	14965800	12764800	5822880	5478960	1560080	FALSE	Acetyl [N-Term];Met-loss+Acetyl [N-Term]	5,41E+18	NaN	NaN	NaN	0	187,681	61	23	174	20	372	40,9	8,35	21066,2	234,83	17	22	O15143	Actin-related protein 2/3 complex subunit 1B OS=Homo sapiens OX=9606 GN=ARPC1B PE=1 SV=3	3	Pf00400	10095	ENSG00000130429	ARPC1B	hsa:10095;O15143;Q9BU00
11667100	14958600	16110600	1169280	412116	71656,8	FALSE	Met-loss [N-Term]	-7,96E+17	NaN	NaN	NaN	0	187,222	54	33	348	20	586	69,4	6,27	37226,7	375,5	30	33	P15311	Ezrin OS=Homo sapiens OX=9606 GN=EZR PE=1 SV=4	1	Pf00373, Pf00769, Pf09379, Pf09380, Pf20492	7430	ENSG00000092820	EZR	E1P5A8;hsa:7430;P15311;P23714;Q4VX75;Q96CU8;Q9NSJ4
173827000	106610000	232965000	47077700	57561200	435787	FALSE	Acetyl [N-Term];Met-loss+Acetyl [N-Term]	3,62E+17	NaN	NaN	NaN	0	186,949	71	27	257	27	339	38,6	7,75	28887	338,82	21	26	P07355	Annexin A2 OS=Homo sapiens OX=9606 GN=ANXA2 PE=1 SV=2	0	Pf00191	302	ENSG00000182718	ANXA2	hsa:302;P07355;Q567R4;Q6N0B3;Q8TBV2;Q96DD5;Q9UDH8
10834000	14828200	40494100	40020500	119553000	440264	FALSE		4,24E+18	NaN	NaN	NaN	0	186,724	40	23	327	23	500	55,1	6,55	39514,4	426,17	21	23	P05155	Plasma protease C1 inhibitor OS=Homo sapiens OX=9606 GN=SERPING1 PE=1 SV=2	0	Pf00079	710	ENSG00000149131	SERPING1	A6NMU0;A8KAI9;B2R6L5;B4E1F0;B4E1H2;hsa:710;P05155;Q16304;Q547W3;Q59EI5;Q7Z455;Q96FE0;Q9UC49;Q9UCF9
12451800	6945580	10869500	2347090	1387230	496492	FALSE	Acetyl [N-Term];Met-loss+Acetyl [N-Term]	-5,79E+18	NaN	NaN	NaN	0	186,323	54	28	153	28	737	82,5	5,1	12320	206,19	17	27	Q9NY33	Dipeptidyl peptidase 3 OS=Homo sapiens OX=9606 GN=DPP3 PE=1 SV=2	0	Pf03571	10072	ENSG00000254986	DPP3	B2RDB5;B4DLX4;F5H8L6;hsa:10072;O95748;Q969H2;Q9BV67;Q9HAL6;Q9NY33
11256100	7518370	9156060	9970420	10670100	1093930	FALSE		-8,49E+18	NaN	NaN	NaN	0	186,32	49	26	251	26	667	75,9	6,98	23162,8	338,18	22	26	Q86UX7	Fermitin family homolog 3 OS=Homo sapiens OX=9606 GN=FERMT3 PE=1 SV=1	0	Pf00169, Pf00373, Pf18124	83706	ENSG00000149781	FERMT3	hsa:83706;Q86UX7;Q8IUA1;Q8N207;Q9BT48
13297300	6314180	14067300	70281500	97228600	9930060	FALSE		6,67E+18	NaN	NaN	NaN	0	185,285	68	20	273	16	345	38,3	7,97	26872,1	497,17	14	20	P02749	Beta-2-glycoprotein 1 OS=Homo sapiens OX=9606 GN=APOH PE=1 SV=3	4	Pf00084, Pf09014	350	ENSG00000091583	APOH	B2R9M3;hsa:350;P02749;Q9UCN7
629083	784485	1363610	70610,6	74606,2	17176,1	FALSE		6,58E+18	NaN	NaN	NaN	0	182,98	67	24	232	1	449	49,9	5,1	22937,8	345,69	16	24	Q9BQE3	Tubulin alpha-1C chain OS=Homo sapiens OX=9606 GN=TUBA1C PE=1 SV=1	1	Pf00091, Pf03953	84790	ENSG00000167553	TUBA1C	hsa:84790;Q9BQE3
33083000	16137900	72661200	NaN	295833	51096,4	FALSE		2,08E+18	NaN	NaN	NaN	0	182,733	63	21	103	21	480	51,3	7,83	7499,73	227,4	12	21	Q92743	Serine protease HTRA1 OS=Homo sapiens OX=9606 GN=HTRA1 PE=1 SV=1	0	Pf00219, Pf02163, Pf07648, Pf13365, Pf17820	5654	ENSG00000166033	HTRA1	D3DRE4;hsa:5654;Q92743;Q9UNS5
38811000	46664600	53114700	16009200	10511600	1040120	FALSE	Acetyl [N-Term];Met-loss+Acetyl [N-Term]	-9,91E+17	NaN	NaN	NaN	0	181,821	85	19	192	19	241	26,9	5,17	18691	392,03	12	18	O00299	Chloride intracellular channel protein 1 OS=Homo sapiens OX=9606 GN=CLIC1 PE=1 SV=4	0	Pf13409, Pf13410	1192	ENSG00000206394;ENSG00000213719;ENSG00000223639;ENSG00000226248;ENSG00000226417;ENSG00000226651;ENSG00000230685	CLIC1	hsa:1192;O00299;Q15089;Q502X1
6700520	11562800	13507600	3971540	1969720	117653	FALSE		2,1E+18	NaN	NaN	NaN	0	180,909	62	28	172	28	562	61,4	6,76	16311	245,78	20	28	P36871	Phosphoglucomutase-1 OS=Homo sapiens OX=9606 GN=PGM1 PE=1 SV=3	0	Pf02878, Pf02879, Pf02880	5236	ENSG00000079739	PGM1	B2R5N9;B4DPV0;hsa:5236;P36871;Q16105;Q16106;Q5BKZ9;Q6NW22;Q86U74;Q96J40;Q9NTY4
73575400	38019700	93428500	2734780	3091900	760654	FALSE		1,07E+18	NaN	NaN	NaN	0	180,383	64	24	217	22	353	37,4	8,95	23470,8	284,77	19	24	P22626	Heterogeneous nuclear ribonucleoproteins A2/B1 OS=Homo sapiens OX=9606 GN=HNRNPA2B1 PE=1 SV=2	2	Pf00076	3181	ENSG00000122566	HNRNPA2B1	A0A024RA27;A0A024RA61;A8K064;hsa:3181;P22626;P22627;Q9UC98;Q9UDJ2
30395900	21651500	44329700	16634900	10413800	1619970	FALSE	Acetyl [N-Term];Met-loss+Acetyl [N-Term]	6,02E+18	NaN	NaN	NaN	0	180,199	72	23	281	23	418	47,3	5,88	27417,8	473,1	15	22	P61158	Actin-related protein 3 OS=Homo sapiens OX=9606 GN=ACTR3 PE=1 SV=3	0	Pf00022	10096	ENSG00000115091	ACTR3	hsa:10096;P32391;P61158;Q53QM2
33111000	14435300	83671900	NaN	NaN	160403	FALSE		-4,23E+18	NaN	NaN	NaN	0	179,514	40	21	138	21	678	74,9	5,69	13741,9	257,07	14	21	Q14393	Growth arrest-specific protein 6 OS=Homo sapiens OX=9606 GN=GAS6 PE=1 SV=3	0	Pf00054, Pf00594, Pf02210, Pf07645, Pf12662	2621	ENSG00000183087	GAS6	B3KRQ7;B3KVL4;E9PBL7;hsa:2621;Q14393;Q6IMN1;Q7Z7N3
37554000	17606900	90914900	1220920	4616230	469635	FALSE		-5,71E+18	NaN	NaN	NaN	0	179,491	62	19	178	19	339	37,8	6,3	23365,5	269,7	16	19	P07858	Cathepsin B OS=Homo sapiens OX=9606 GN=CTSB PE=1 SV=3	0	Pf00112, Pf08127	1508	ENSG00000164733	CTSB	B3KQR5;B3KRR5;hsa:1508;P07858;Q503A6;Q96D87
78226300	69392000	83072600	36705200	45259600	1088620	FALSE	Acetyl [N-Term];Met-loss+Acetyl [N-Term]	-6,98E+18	NaN	NaN	NaN	0	179,432	86	22	620	15	246	28,1	4,83	72794,6	696,2	18	21	P31946	14-3-3 protein beta/alpha OS=Homo sapiens OX=9606 GN=YWHAB PE=1 SV=3	3	Pf00244	7529	ENSG00000166913	YWHAB	A8K9K2;E1P616;hsa:7529;P31946
18038400	21729700	22123100	161681	194504	289989	FALSE		7,67E+18	NaN	NaN	NaN	0	179,362	76	21	108	21	362	41,8	4,86	13615,5	225,56	15	21	Q9BRK5	45 kDa calcium-binding protein OS=Homo sapiens OX=9606 GN=SDF4 PE=1 SV=1	0	Pf13202, Pf13499	51150	ENSG00000078808	SDF4	B1AME5;B1AME6;B2RDF1;B4DSM1;hsa:51150;Q53G52;Q53HQ9;Q8NBQ3;Q96AA1;Q9BRK5;Q9NZP7;Q9UN53
5775700	4198340	7842360	1484340	1601460	159939	FALSE		6,4E+18	NaN	NaN	NaN	0	179,124	31	29	98	29	1555	177,1	5,63	8117,72	129,77	19	29	Q9NYU2	UDP-glucose:glycoprotein glucosyltransferase 1 OS=Homo sapiens OX=9606 GN=UGGT1 PE=1 SV=3	0	Pf06427, Pf18400, Pf18401, Pf18402, Pf18403, Pf18404	56886	ENSG00000136731	UGGT1	hsa:56886;Q53QP2;Q53SL3;Q8IW30;Q9H8I4;Q9NYU2
9230790	8959990	6839280	26917,9	549982	40015,4	FALSE		-6,82E+18	NaN	NaN	NaN	0	178,998	43	26	114	26	925	104,9	7,14	10071,6	174,24	17	26	P22413	Ectonucleotide pyrophosphatase/phosphodiesterase family member 1 OS=Homo sapiens OX=9606 GN=ENPP1 PE=1 SV=2	0	Pf01033, Pf01223, Pf01663	5167	ENSG00000197594	ENPP1	hsa:5167;P22413;Q5T9R6;Q9NPZ3;Q9P1P6;Q9UP61;Q9Y6K3
7926820	1502600	9154450	17007900	14757100	1765070	FALSE	Acetyl [N-Term];Met-loss+Acetyl [N-Term]	7,59E+18	NaN	NaN	NaN	0	178,645	48	31	248	31	714	81,8	5,67	27327,2	290,44	26	30	P07384	Calpain-1 catalytic subunit OS=Homo sapiens OX=9606 GN=CAPN1 PE=1 SV=1	0	Pf00648, Pf01067, Pf13833	823	ENSG00000014216	CAPN1	hsa:823;P07384;Q2TTR0;Q6DHV4
14308700	11025000	24543900	NaN	19276,5	163241	FALSE		6,26E+18	NaN	NaN	NaN	0	178,564	21	24	99	24	1594	177,6	7,87	10167,2	176,92	18	24	P58397	A disintegrin and metalloproteinase with thrombospondin motifs 12 OS=Homo sapiens OX=9606 GN=ADAMTS12 PE=1 SV=2	0	Pf00090, Pf01421, Pf01562, Pf05986, Pf17771, Pf19030, Pf19236	81792	ENSG00000151388	ADAMTS12	A2RRN9;A5D6V6;hsa:81792;P58397;Q6UWL3
50114700	50495000	53984500	NaN	NaN	NaN	FALSE		2,25E+18	NaN	NaN	NaN	0	178,099	65	17	93	17	381	42	8,21	8077,22	193,54	8	17	O00622	CCN family member 1 OS=Homo sapiens OX=9606 GN=CCN1 PE=1 SV=1	0	Pf00007, Pf00093, Pf00219, Pf19035	3491	ENSG00000142871	CCN1	hsa:3491;O00622;O14934;O43775;Q9BZL7
40080300	24188300	24411000	473840	458332	NaN	FALSE		3,77E+18	NaN	NaN	NaN	0	177,625	53	17	122	17	431	48,5	8,41	15364,2	220,03	13	17	P00749	Urokinase-type plasminogen activator OS=Homo sapiens OX=9606 GN=PLAU PE=1 SV=3	0	Pf00051, Pf00089	5328	ENSG00000122861	PLAU	B4DPZ2;hsa:5328;P00749;Q15844;Q16618;Q53XS3;Q5SWW9;Q969W6
12701300	16063600	55681300	NaN	NaN	NaN	FALSE		-2,04E+18	NaN	NaN	NaN	0	177,331	72	21	114	21	344	38	5,67	10591	195,08	16	21	P19883	Follistatin OS=Homo sapiens OX=9606 GN=FST PE=1 SV=2	0	Pf07648, Pf09289	10468	ENSG00000134363	FST	B5BU94;hsa:10468;P19883;Q9BTH0
13544000	4590840	11359100	22697200	37990300	211574	FALSE		8,58E+18	NaN	NaN	NaN	0	175,438	50	25	160	25	559	63,1	5,59	17036,7	278,04	17	25	P02748	Complement component C9 OS=Homo sapiens OX=9606 GN=C9 PE=1 SV=2	0	Pf00057, Pf00090, Pf01823	735	ENSG00000113600	C9	hsa:735;P02748
5908980	7805920	4075450	1185330	2290880	1997310	TRUE		-5,61E+18	NaN	NaN	NaN	0	175,304	48	26	162	20	593	59,5	5,21	16664,7	217,82	20	26	P13645	SWISS-PROT:P13645 Tax_Id=9606 Gene_Symbol=KRT10 Keratin, type I cytoskeletal 10	6
26338900	21976100	39147500	1185660	1283690	28560,6	FALSE		-6,61E+18	NaN	NaN	NaN	0	175,087	55	25	201	25	420	50,2	5,12	20737,9	320,34	19	25	P80303	Nucleobindin-2 OS=Homo sapiens OX=9606 GN=NUCB2 PE=1 SV=3	0	Pf13499	4925	ENSG00000070081	NUCB2	A8K642;D3DQX5;hsa:4925;P80303;Q8NFT5;V9HW75
20845400	7088380	34562200	9377,8	NaN	13360,8	FALSE		-7,72E+18	NaN	NaN	NaN	0	174,785	18	30	122	30	2944	295	6,27	9620,59	195,76	17	30	Q02388	Collagen alpha-1(VII) chain OS=Homo sapiens OX=9606 GN=COL7A1 PE=1 SV=2	0	Pf00014, Pf00041, Pf00092, Pf01391	1294	ENSG00000114270	COL7A1	hsa:1294;Q02388;Q14054;Q16507
6758900	8880010	8393760	28922900	58050300	2639520	FALSE		3,71E+18	NaN	NaN	NaN	0	174,617	60	28	234	28	638	71,3	8,22	23938	275,11	24	28	P03952	Plasma kallikrein OS=Homo sapiens OX=9606 GN=KLKB1 PE=1 SV=1	0	Pf00024, Pf00089	3818	ENSG00000164344	KLKB1	A6NH96;B2R8H9;hsa:3818;P03952;Q17RE8;Q17RE9;Q4W5C3
9679960	2242200	24604200	879754	222387	578762	FALSE		-3,03E+18	NaN	NaN	NaN	0	174,127	45	24	123	24	944	106,8	6,14	10964	207,07	15	24	Q14697	Neutral alpha-glucosidase AB OS=Homo sapiens OX=9606 GN=GANAB PE=1 SV=3	0	Pf01055, Pf13802	23193	ENSG00000089597	GANAB	A6NC20;hsa:23193;Q14697;Q8WTS9;Q9P0X0
7604580	6426340	13195100	978452	1076070	188694	FALSE	Acetyl [N-Term];Met-loss+Acetyl [N-Term]	7,74E+18	NaN	NaN	NaN	0	173,802	49	29	114	29	910	101,9	7,17	11314	155,82	18	28	Q7KZF4	Staphylococcal nuclease domain-containing protein 1 OS=Homo sapiens OX=9606 GN=SND1 PE=1 SV=1	0	Pf00565, Pf00567	27044	ENSG00000197157	SND1	hsa:27044;Q13122;Q7KZF4;Q96AG0
23147300	28589900	40752100	487356	524231	58271,9	FALSE		-4,1E+17	NaN	NaN	NaN	0	173,051	62	19	128	19	462	50,1	9,01	9363,34	279,82	11	19	P68104	Elongation factor 1-alpha 1 OS=Homo sapiens OX=9606 GN=EEF1A1 PE=1 SV=1	0	Pf00009, Pf03143, Pf03144	1915	ENSG00000156508	EEF1A1	hsa:1915;P04719;P04720;P68104;Q6IQ15
51330200	17028400	41477000	5034430	2766580	1961000	FALSE	Acetyl [N-Term];Met-loss+Acetyl [N-Term]	4,39E+18	NaN	NaN	NaN	0	172,938	58	22	262	22	346	38,7	7,02	34677,5	368,47	20	21	P04083	Annexin A1 OS=Homo sapiens OX=9606 GN=ANXA1 PE=1 SV=2	0	Pf00191	301	ENSG00000135046	ANXA1	B5BU38;hsa:301;P04083
44522300	13735700	38060600	70436400	41167600	18615700	FALSE		-3,36E+18	NaN	NaN	NaN	0	172,397	94	13	167	13	154	15,9	6,13	13353,3	438,44	6	13	P00441	Superoxide dismutase [Cu-Zn] OS=Homo sapiens OX=9606 GN=SOD1 PE=1 SV=2	0	Pf00080	6647	ENSG00000142168	SOD1	A6NHJ0;D3DSE4;hsa:6647;P00441;Q16669;Q16711;Q16838;Q16839;Q16840;Q6NR85
13840000	5625840	9156570	126673000	110856000	47129500	FALSE		-1,82E+18	NaN	NaN	NaN	0	171,847	84	20	284	20	277	31,5	8,65	20068,7	505,74	12	20	Q15404	Ras suppressor protein 1 OS=Homo sapiens OX=9606 GN=RSU1 PE=1 SV=3	0	Pf13855	6251	ENSG00000148484	RSU1	A8KA46;D3DRU3;hsa:6251;Q15404;Q6FI17
5578210	8853120	5945500	424808	315423	21712,1	FALSE	Met-loss [N-Term]	-1,63E+18	NaN	NaN	NaN	0	171,842	52	32	282	15	583	68,5	6,37	30593,4	313,06	30	32	P35241	Radixin OS=Homo sapiens OX=9606 GN=RDX PE=1 SV=1	0	Pf00373, Pf00769, Pf09379, Pf09380, Pf20492	5962	ENSG00000137710	RDX	A7YIJ8;A7YIK0;A7YIK3;B7Z9U6;F5H1A7;hsa:5962;P35241;Q86Y61
1806280	4136590	1705450	531819	837930	56027,3	FALSE		8,96E+18	NaN	NaN	NaN	0	171,796	53	21	237	7	448	49,9	5,06	20122,8	332,45	15	21	P68366	Tubulin alpha-4A chain OS=Homo sapiens OX=9606 GN=TUBA4A PE=1 SV=1	0	Pf00091, Pf03953	7277	ENSG00000127824	TUBA4A	A8MUB1;B3KNQ6;hsa:7277;P05215;P68366
56619600	20430800	49792000	1607990	1491890	179571	FALSE		8,37E+18	NaN	NaN	NaN	0	170,608	39	19	190	5	372	38,7	9,13	18789,8	284,13	14	19	P09651	Heterogeneous nuclear ribonucleoprotein A1 OS=Homo sapiens OX=9606 GN=HNRNPA1 PE=1 SV=5	12	Pf00076, Pf11627	3178	ENSG00000135486	HNRNPA1	A8K4Z8;hsa:3178;P09651;Q3MIB7;Q6PJZ7
35545700	14601100	33143600	4186040	1962700	608195	FALSE		-2,26E+18	NaN	NaN	NaN	0	170,476	71	26	151	26	338	35,5	8,68	13808,4	185,45	20	26	P40926	Malate dehydrogenase, mitochondrial OS=Homo sapiens OX=9606 GN=MDH2 PE=1 SV=3	0	Pf00056, Pf02866	4191	ENSG00000146701	MDH2	A8K414;B2RE78;B4DE44;E9PDB2;hsa:4191;O43682;P40926
17809100	11569200	18935400	6959510	8191200	5194780	FALSE		-1,89E+18	NaN	NaN	NaN	0	170,229	53	28	178	28	474	53,2	7,08	20783,6	276,19	23	28	Q9ULV4	Coronin-1C OS=Homo sapiens OX=9606 GN=CORO1C PE=1 SV=1	0	Pf00400, Pf08953, Pf16300	23603	ENSG00000110880	CORO1C	A7MAP0;A7MAP1;B3KU12;hsa:23603;Q9NSK5;Q9ULV4
8954180	NaN	10098500	76729800	94049400	NaN	FALSE		-2,21E+18	NaN	NaN	NaN	0	170,117	42	13	417	2	455	48,9	6,67	31377,7	698,57	9	13	P0DOX2	Immunoglobulin alpha-2 heavy chain OS=Homo sapiens OX=9606 PE=1 SV=2	4	Pf00047, Pf07654, Pf07686
10695700	9800940	15094200	49312900	50692300	5237640	FALSE		8,73E+18	NaN	NaN	NaN	0	170,102	50	28	278	27	599	69	5,9	26237,4	352,91	21	28	P43652	Afamin OS=Homo sapiens OX=9606 GN=AFM PE=1 SV=1	1	Pf00273	173	ENSG00000079557	AFM	A8K3E1;hsa:173;P43652;Q32MR3;Q4W5C5
35909500	31633500	41711600	21214000	17521400	7137870	FALSE		9,06E+17	NaN	NaN	NaN	0	170,095	67	24	197	24	432	47,6	5,97	19590,2	282,44	15	24	Q8NBS9	Thioredoxin domain-containing protein 5 OS=Homo sapiens OX=9606 GN=TXNDC5 PE=1 SV=2	0	Pf00085	81567	ENSG00000239264	TXNDC5	B2RDM2;hsa:81567;Q5TCQ0;Q8NBS9;Q8ND33;Q8TCT2;Q9BVH9
14925000	7952480	29417800	53261800	62143700	1189780	FALSE		7,84E+18	NaN	NaN	NaN	0	169,565	60	24	387	6	285	32,9	4,72	44617,6	502,97	24	24	P06753	Tropomyosin alpha-3 chain OS=Homo sapiens OX=9606 GN=TPM3 PE=1 SV=2	0	Pf00261	7170	ENSG00000143549	TPM3	D3DV71;hsa:7170;P06753;P12324;Q2QD06;Q5VU58;Q5VU63;Q5VU66;Q5VU71;Q5VU72;Q8TCG3;Q969Q2;Q9NQH8
8476970	4268310	19469100	235574	NaN	NaN	FALSE		-3,8E+18	NaN	NaN	NaN	0	169,231	47	23	121	22	956	104,1	4,65	9305,45	162,22	11	23	P49746	Thrombospondin-3 OS=Homo sapiens OX=9606 GN=THBS3 PE=1 SV=1	0	Pf02412, Pf05735, Pf07645, Pf11598	7059	ENSG00000169231	THBS3	B1AVR8;B4DQ20;hsa:7059;P49746;Q8WV34
13020400	33227600	31782000	NaN	33822,2	1313,33	FALSE		-8,78E+18	NaN	NaN	NaN	0	169,228	84	23	117	23	421	47,3	6,7	7938,06	241,48	12	23	Q9UI42	Carboxypeptidase A4 OS=Homo sapiens OX=9606 GN=CPA4 PE=1 SV=2	0	Pf00246, Pf02244	51200	ENSG00000128510	CPA4	B7Z576;hsa:51200;Q86UY9;Q9UI42
3299690	4027250	5823690	56736900	118833000	305809	FALSE		5,88E+18	NaN	NaN	NaN	0	169,191	65	23	237	23	317	36,1	5,73	27282,7	283,87	22	23	P02649	Apolipoprotein E OS=Homo sapiens OX=9606 GN=APOE PE=1 SV=1	0	Pf01442	348	ENSG00000130203	APOE	B2RC15;C0JYY5;hsa:348;P02649;Q9P2S4
71858400	36345000	77535800	2790990	3118380	532720	FALSE	Met-loss [N-Term]	2,41E+18	NaN	NaN	NaN	0	168,516	88	13	273	13	172	19,6	4,93	29770,3	368,93	9	12	P13693	Translationally-controlled tumor protein OS=Homo sapiens OX=9606 GN=TPT1 PE=1 SV=1	0	Pf00838	7178	ENSG00000133112	TPT1	B2R7E5;hsa:7178;P13693;Q6YLS2;Q7Z4J4;Q8TBK7;Q96EE2;Q9UC70
24394100	14848200	23948900	32820800	54717300	2549790	FALSE		-8,34E+18	NaN	NaN	NaN	0	168,37	48	17	294	16	352	39	6,25	47497,8	502,67	14	17	P02760	Protein AMBP OS=Homo sapiens OX=9606 GN=AMBP PE=1 SV=1	0	Pf00014, Pf00061	259	ENSG00000106927	AMBP	hsa:259;P00977;P02759;P02760;P78491;Q2TU33;Q5TBD7;Q9UC58;Q9UDI8
52366700	53178100	65317900	6967040	6203870	1565140	FALSE	Acetyl [N-Term];Met-loss+Acetyl [N-Term]	6,24E+17	NaN	NaN	NaN	0	168,35	72	18	561	13	247	28,3	4,89	60515,6	592,64	15	17	P61981	14-3-3 protein gamma OS=Homo sapiens OX=9606 GN=YWHAG PE=1 SV=2	0	Pf00244	7532	ENSG00000170027	YWHAG	hsa:7532;O70457;P35214;P61981;Q6FH52;Q9UDP2;Q9UN99
4464420	936345	7924140	19185800	31288800	799177	FALSE		5,07E+18	NaN	NaN	NaN	0	166,351	48	19	109	19	584	65,1	6,47	8396,04	235,66	12	19	P07357	Complement component C8 alpha chain OS=Homo sapiens OX=9606 GN=C8A PE=1 SV=2	0	Pf00057, Pf00090, Pf01823	731	ENSG00000157131	C8A	A2RUI4;A2RUI5;hsa:731;P07357;Q13668;Q9H130
8427180	10879400	14594800	786924	687260	408513	FALSE	Acetyl [N-Term];Met-loss+Acetyl [N-Term]	7,38E+18	NaN	NaN	NaN	0	166,284	59	25	112	24	541	59,6	5,66	9605,49	163,74	17	24	P48643	T-complex protein 1 subunit epsilon OS=Homo sapiens OX=9606 GN=CCT5 PE=1 SV=1	1	Pf00118	22948	ENSG00000150753	CCT5	A8JZY8;A8K2X8;B4DYD8;hsa:22948;P48643
12528700	5392150	19513700	291577	293979	15878,6	FALSE		-1,57E+18	NaN	NaN	NaN	0	166,055	32	21	144	21	1070	118,3	7,09	13140	217,17	14	21	Q13308	Inactive tyrosine-protein kinase 7 OS=Homo sapiens OX=9606 GN=PTK7 PE=1 SV=2	0	Pf07679, Pf07714, Pf13927	5754	ENSG00000112655	PTK7	A8K974;B7Z477;E9PFZ5;hsa:5754;Q13308;Q13417;Q5T650;Q6IQ54;Q8NFA5;Q8NFA6;Q8NFA7;Q8NFA8
5215860	2724610	7681770	47218,9	77462,9	33890	FALSE		-7,11E+18	NaN	NaN	NaN	0	165,941	16	28	86	28	3571	389,9	5,5	5039,72	145,85	12	28	Q4LDE5	Sushi, von Willebrand factor type A, EGF and pentraxin domain-containing protein 1 OS=Homo sapiens OX=9606 GN=SVEP1 PE=1 SV=3	0	Pf00008, Pf00084, Pf00092, Pf00354, Pf02494, Pf07645, Pf07699, Pf12661	79987	ENSG00000165124	SVEP1	hsa:79987;Q0P675;Q4LDE5;Q5D213;Q5T938;Q5VTE4;Q5VTE5;Q7Z387;Q7Z3G3;Q8NBT9;Q96JU7;Q9H284;Q9H8J9
594943	270553	596335	22653000	25601000	4027350	FALSE		2,04E+18	NaN	NaN	NaN	0	165,018	48	25	154	25	661	75,5	6,39	15281,1	209,29	21	25	P05160	Coagulation factor XIII B chain OS=Homo sapiens OX=9606 GN=F13B PE=1 SV=3	0	Pf00084	2165	ENSG00000143278	F13B	A8K3E5;hsa:2165;P05160;Q5VYL5
1860740	232397	1057340	51406,4	32038,5	30756,5	FALSE		-4,64E+18	NaN	NaN	NaN	0	164,973	16	26	274	9	1976	228,9	5,54	32180,8	403,07	21	26	P35580	Myosin-10 OS=Homo sapiens OX=9606 GN=MYH10 PE=1 SV=3	0	Pf00063, Pf00612, Pf01576, Pf02736	4628	ENSG00000133026	MYH10	B2RWP9;D3DTS1;F8VTL3;hsa:4628;P35580;Q12989;Q149N3;Q149N4;Q16087;Q4LE45;Q6PK16;Q9BWG0
9600630	5635630	9113700	439201	104266	41014,9	FALSE		-8,2E+18	NaN	NaN	NaN	0	164,932	23	29	112	29	1782	191,4	4,41	9650,95	161,68	21	29	Q02952	A-kinase anchor protein 12 OS=Homo sapiens OX=9606 GN=AKAP12 PE=1 SV=4	0	Pf03832, Pf10522	9590	ENSG00000131016	AKAP12	hsa:9590;O00310;O00498;Q02952;Q4LE68;Q5SZ80;Q5TGN1;Q68D82;Q99970
15829100	8554000	22722400	3098280	1775220	348476	FALSE	Acetyl [N-Term]	7E+18	NaN	NaN	NaN	0	164,904	46	22	159	16	636	70,6	9,5	18933	259,61	18	22	P11940	Polyadenylate-binding protein 1 OS=Homo sapiens OX=9606 GN=PABPC1 PE=1 SV=2	6	Pf00076, Pf00658	26986	ENSG00000070756	PABPC1	hsa:26986;P11940;Q15097;Q93004
20812600	1637110	23956700	19745700	3748600	3007830	FALSE		5,66E+18	NaN	NaN	NaN	0	164,646	35	27	137	27	967	109,5	5,48	13621	203,71	20	27	P15144	Aminopeptidase N OS=Homo sapiens OX=9606 GN=ANPEP PE=1 SV=4	0	Pf01433, Pf11838, Pf17900	290	ENSG00000166825	ANPEP	hsa:290;P15144;Q16728;Q6GT90;Q8IUK3;Q8IVH3;Q9UCE0
6193610	13459600	9174660	160727	226338	176528	FALSE	Acetyl [N-Term];Met-loss+Acetyl [N-Term]	7,51E+18	NaN	NaN	NaN	0	164,536	71	22	74	22	317	35,1	7,69	7164,93	156,35	12	20	P63244	Receptor of activated protein C kinase 1 OS=Homo sapiens OX=9606 GN=RACK1 PE=1 SV=3	0	Pf00400	10399	ENSG00000204628	RACK1	B3KTJ0;D3DWS0;hsa:10399;P25388;P63244;P99049;Q53HU2;Q5J8M6;Q5VLR4;Q6FH47
4852990	7814410	9312990	1439670	1608160	382215	FALSE		8,83E+17	NaN	NaN	NaN	0	164,516	41	30	97	30	941	107,2	6,46	7819,04	129,78	20	30	Q9NZ08	Endoplasmic reticulum aminopeptidase 1 OS=Homo sapiens OX=9606 GN=ERAP1 PE=1 SV=3	0	Pf01433, Pf11838, Pf17900	51752	ENSG00000164307	ERAP1	hsa:51752;O60278;Q6UWY6;Q8NEL4;Q8TAD0;Q9NZ08;Q9UHF8;Q9UKY2
15282100	5526650	18998800	1315080	1851090	66373,7	FALSE		-1,44E+18	NaN	NaN	NaN	0	164,357	71	21	115	21	434	47	5,44	13335,7	202,08	13	21	O60664	Perilipin-3 OS=Homo sapiens OX=9606 GN=PLIN3 PE=1 SV=3	0	Pf03036	10226	ENSG00000105355	PLIN3	A8K4Y9;hsa:10226;K7EQF4;O60664;Q53G77;Q9BS03;Q9UBD7;Q9UP92
10042100	7273100	11687500	3281490	2304200	2847570	FALSE		5,53E+18	NaN	NaN	NaN	0	164,018	30	35	111	35	1411	162,4	5,68	11559,7	124,53	28	35	Q15075	Early endosome antigen 1 OS=Homo sapiens OX=9606 GN=EEA1 PE=1 SV=2	0	Pf01363	8411	ENSG00000102189	EEA1	hsa:8411;Q14221;Q15075
9281130	12174800	8816110	NaN	196667	125724	FALSE		8,07E+18	NaN	NaN	NaN	0	163,172	61	25	96	22	570	61,9	6,49	9909,62	175,82	16	25	Q14195	Dihydropyrimidinase-related protein 3 OS=Homo sapiens OX=9606 GN=DPYSL3 PE=1 SV=1	3	Pf01979	1809	ENSG00000113657	DPYSL3	B3SXQ8;hsa:1809;Q14195;Q93012
13025300	5044930	13561200	16417400	8288430	4379670	FALSE		-2,85E+18	NaN	NaN	NaN	0	163,122	57	33	237	32	586	66,4	5,16	22588,1	269,81	26	33	P20700	Lamin-B1 OS=Homo sapiens OX=9606 GN=LMNB1 PE=1 SV=2	0	Pf00038, Pf00932	4001	ENSG00000113368	LMNB1	B2R6J6;hsa:4001;P20700;Q3SYN7;Q96EI6
15453500	23588700	18839700	483972	967882	132693	FALSE		5,62E+18	NaN	NaN	NaN	0	162,916	55	27	136	27	573	61	5,87	16739,4	201,34	21	27	P10809	60 kDa heat shock protein, mitochondrial OS=Homo sapiens OX=9606 GN=HSPD1 PE=1 SV=2	0	Pf00118	3329	ENSG00000144381	HSPD1	B2R5M6;B7Z712;hsa:3329;P10809;Q38L19;Q9UCR6
826167	121482	453368	131920000	59211500	15926600	FALSE	Acetyl [N-Term];Met-loss [N-Term];Met-loss+Acetyl [N-Term]	-8,8E+18	NaN	NaN	NaN	0	162,906	89	8	94	8	92	10,6	6,25	12649,4	210,51	5	7	P80511	Protein S100-A12 OS=Homo sapiens OX=9606 GN=S100A12 PE=1 SV=2	0	Pf01023	6283	ENSG00000163221	S100A12	hsa:6283;P80511;P83219;Q5SY66;Q7M4R1
7264580	9741850	10855600	628385	566584	224535	FALSE	Acetyl [N-Term]	-3,96E+18	NaN	NaN	NaN	0	162,88	63	27	133	27	556	60,3	6,11	13261,2	190,31	21	27	P17987	T-complex protein 1 subunit alpha OS=Homo sapiens OX=9606 GN=TCP1 PE=1 SV=1	0	Pf00118	6950	ENSG00000120438	TCP1	E1P5B2;hsa:6950;P17987;Q15556;Q5TCM3
6920980	12582700	15525800	4867790	5400740	1761850	FALSE		-4,95E+18	NaN	NaN	NaN	0	162,658	39	28	142	28	999	111,3	5,22	11523,8	195,46	19	28	Q9Y4L1	Hypoxia up-regulated protein 1 OS=Homo sapiens OX=9606 GN=HYOU1 PE=1 SV=1	0	Pf00012	10525	ENSG00000149428;ENSG00000280682	HYOU1	A8C1Z0;B7Z909;hsa:10525;Q2I204;Q53H25;Q9Y4L1
13034000	23645100	14396900	9100190	10744600	4110670	FALSE	Acetyl [N-Term]	3,93E+18	NaN	NaN	NaN	0	161,481	68	36	229	36	543	62,6	6,8	22340	207,66	32	36	P31948	Stress-induced-phosphoprotein 1 OS=Homo sapiens OX=9606 GN=STIP1 PE=1 SV=1	0	Pf00515, Pf13181, Pf17830	10963	ENSG00000168439	STIP1	B4DM70;F5H0T1;G3XAD8;hsa:10963;P31948;Q3ZCU9;Q5TZU9
10094100	10332400	19075300	27800000	31505000	2569650	FALSE		-8,54E+18	NaN	NaN	NaN	0	160,99	47	27	242	27	583	65,7	7,5	22820,5	285,09	21	27	P05156	Complement factor I OS=Homo sapiens OX=9606 GN=CFI PE=1 SV=2	0	Pf00057, Pf00089, Pf00530	3426	ENSG00000205403	CFI	hsa:3426;O60442;P05156
34631300	78813300	41462600	1343680	800425	995721	FALSE	Met-loss [N-Term]	-5,4E+18	NaN	NaN	NaN	0	160,883	64	13	124	13	223	24,8	5,48	7438,34	223,61	8	12	P09936	Ubiquitin carboxyl-terminal hydrolase isozyme L1 OS=Homo sapiens OX=9606 GN=UCHL1 PE=1 SV=2	0	Pf01088	7345	ENSG00000154277	UCHL1	hsa:7345;P09936;Q4W5K6;Q71UM0
60436600	120488000	85557200	3098320	26323900	723762	TRUE		-4,95E+18	NaN	NaN	NaN	0	160,874	47	22	272	22	416	46,1	6,52	27533,6	356,65	19	22	P34955	SWISS-PROT:P34955 (Bos taurus) Alpha-1-antiproteinase precursor	0	Pf00079	280699	ENSBTAG00000018843	SERPINA1	bta:280699;P34955;Q3SZS3
4147540	2058260	9510520	120110	36482	22161,8	FALSE		-2,31E+18	NaN	NaN	NaN	0	160,872	11	34	111	34	4646	532,1	6,4	9837,34	104,25	25	33	Q14204	Cytoplasmic dynein 1 heavy chain 1 OS=Homo sapiens OX=9606 GN=DYNC1H1 PE=1 SV=5	0	Pf03028, Pf08385, Pf08393, Pf12774, Pf12775, Pf12777, Pf12780, Pf12781, Pf17852, Pf18198, Pf18199	1778	ENSG00000197102	DYNC1H1	B0I1R0;hsa:1778;Q14204;Q6DKQ7;Q8WU28;Q92814;Q9Y4G5
53064600	75922700	111285000	970840	434694	1568400	FALSE		-2,1E+17	NaN	NaN	NaN	0	160,696	53	23	188	23	401	45,3	4,97	23525,2	268,74	22	23	Q8NBJ4	Golgi membrane protein 1 OS=Homo sapiens OX=9606 GN=GOLM1 PE=1 SV=1	0		51280	ENSG00000135052	GOLM1	hsa:51280;Q6IAF4;Q8NBJ4;Q9NRB9
6061530	12577900	41149200	23804900	37278300	1487500	FALSE		7,8E+18	NaN	NaN	NaN	0	160,443	35	20	166	19	770	86,9	4,82	17415,6	221,27	16	20	P05067	Amyloid-beta precursor protein OS=Homo sapiens OX=9606 GN=APP PE=1 SV=3	0	Pf00014, Pf02177, Pf03494, Pf10515, Pf12924, Pf12925	351	ENSG00000142192	APP	B2R5V1;B4DII8;D3DSD1;D3DSD2;D3DSD3;hsa:351;P05067;P09000;P78438;Q13764;Q13778;Q13793;Q16011;Q16014;Q16019;Q16020;Q6GSC0;Q8WZ99;Q9BT38;Q9UC33;Q9UCA9;Q9UCB6;Q9UCC8;Q9UCD1;Q9UQ58
8223490	2621230	21766800	39596400	34066700	20283700	FALSE		-1,24E+18	NaN	NaN	NaN	0	159,267	59	19	262	18	390	44,3	8,53	27739,1	437,61	14	19	P01137	Transforming growth factor beta-1 proprotein OS=Homo sapiens OX=9606 GN=TGFB1 PE=1 SV=2	1	Pf00019, Pf00688	7040		TGFB1	A8K792;hsa:7040;P01137;Q9UCG4
20596600	19770800	13469100	15432400	33663400	12100000	FALSE		-1,79E+18	NaN	NaN	NaN	0	159,088	90	19	207	8	184	20,8	5,78	22353,7	259,84	12	19	P61224	Ras-related protein Rap-1b OS=Homo sapiens OX=9606 GN=RAP1B PE=1 SV=1	11	Pf00071	5908	ENSG00000127314	RAP1B	B2R5Z2;B4DQI8;B4DW74;B4DW94;hsa:5908;P09526;P61224;Q502X3;Q5TZR4;Q6DCA1;Q6LES0
13038800	18544100	16113500	3297640	3576940	1504670	FALSE	Acetyl [N-Term];Met-loss+Acetyl [N-Term]	-1,15E+18	NaN	NaN	NaN	0	158,571	66	32	137	32	508	56,9	8,15	12368	177,4	23	31	Q16851	UTP--glucose-1-phosphate uridylyltransferase OS=Homo sapiens OX=9606 GN=UGP2 PE=1 SV=5	0	Pf01704	7360	ENSG00000169764	UGP2	hsa:7360;Q07131;Q0P6K2;Q16851;Q86Y81;Q9BU15
11899500	5433130	6903010	2253660	1243540	1108460	FALSE		-4,86E+18	NaN	NaN	NaN	0	158,373	49	22	131	22	649	70,9	7,39	10289	249,41	12	22	Q16881	Thioredoxin reductase 1, cytoplasmic OS=Homo sapiens OX=9606 GN=TXNRD1 PE=1 SV=3	0	Pf00462, Pf02852, Pf07992	7296	ENSG00000198431	TXNRD1	B7Z1F4;B7Z3Y8;B7Z904;E9PMY9;F5H780;hsa:7296;Q16881;Q6FI31;Q6VB40;Q6VB41;Q6VB42;Q6VBP2;Q6VBP3;Q6VBP4;Q6VBP5;Q6VBP9;Q6VBQ0;Q6YNQ1;Q76P53;Q7LA96;Q8WVC8;Q99475;Q9UES8;Q9UH79
14528800	4537840	21565400	NaN	162957	390487	FALSE		7,88E+18	NaN	NaN	NaN	0	157,782	19	21	134	21	1762	193,3	7,8	16738,3	234,84	16	21	Q8N6G6	ADAMTS-like protein 1 OS=Homo sapiens OX=9606 GN=ADAMTSL1 PE=1 SV=4	0	Pf00090, Pf05986, Pf07679, Pf08686, Pf13927, Pf19030, Pf19236	92949	ENSG00000178031	ADAMTSL1	A6PVN1;A8K7E1;hsa:92949;Q496M6;Q496M8;Q5T708;Q5VZT8;Q8N6G6;Q8NAI9;Q96RW4;Q9BXY3
358121	31335,7	184956	123898000	56421500	37973500	FALSE		-8,75E+18	NaN	NaN	NaN	0	156,903	72	19	222	19	198	22,6	8,91	23403,2	282,54	14	19	P80188	Neutrophil gelatinase-associated lipocalin OS=Homo sapiens OX=9606 GN=LCN2 PE=1 SV=2	0	Pf00061	3934	ENSG00000148346	LCN2	A6NII8;B4DWV4;B7ZAA2;hsa:3934;P30150;P80188;Q5SYV9;Q5SYW0;Q6FGL5;Q92683
8777820	4094040	9188910	50152400	42006900	3961660	FALSE		1,62E+18	NaN	NaN	NaN	0	156,18	53	17	212	17	485	53,1	6,32	23084,8	293,33	13	17	P01019	Angiotensinogen OS=Homo sapiens OX=9606 GN=AGT PE=1 SV=3	0	Pf00079	183	ENSG00000135744	AGT	P01019;Q16358;Q16359;Q96F91
11159900	6978020	17198000	25182000	20098600	2312380	FALSE	Acetyl [N-Term];Met-loss+Acetyl [N-Term]	6,55E+18	NaN	NaN	NaN	0	156,103	49	22	156	22	380	39,8	8,94	20133,7	247,59	17	21	P50552	Vasodilator-stimulated phosphoprotein OS=Homo sapiens OX=9606 GN=VASP PE=1 SV=3	0	Pf00568, Pf08776	7408	ENSG00000125753	VASP	B2RBT9;hsa:7408;P50552;Q6PIZ1;Q93035
12515100	19113600	15101900	9623580	10098100	7394970	FALSE	Acetyl [N-Term];Met-loss+Acetyl [N-Term]	7,18E+18	NaN	NaN	NaN	0	155,78	85	18	192	15	286	32,9	5,69	26402,9	311,07	13	17	P52907	F-actin-capping protein subunit alpha-1 OS=Homo sapiens OX=9606 GN=CAPZA1 PE=1 SV=3	3	Pf01267	829	ENSG00000116489	CAPZA1	hsa:829;P52907;Q53FQ6;Q6FHD5
19151200	3280940	22717000	4105670	1036220	855946	FALSE		-7E+18	NaN	NaN	NaN	0	155,145	30	28	128	28	1140	126,9	5,26	12647,1	173,78	22	28	Q16531	DNA damage-binding protein 1 OS=Homo sapiens OX=9606 GN=DDB1 PE=1 SV=1	0	Pf03178, Pf10433	1642	ENSG00000167986	DDB1	A6NG77;B2R648;B4DG00;hsa:1642;O15176;Q13289;Q16531;Q58F96
10941800	4208270	11032900	862202	48394400	343838	FALSE		5,66E+18	NaN	NaN	NaN	0	155,127	55	22	159	22	423	47,6	5,52	16021,1	231,66	18	22	P01011	Alpha-1-antichymotrypsin OS=Homo sapiens OX=9606 GN=SERPINA3 PE=1 SV=2	0	Pf00079	12	ENSG00000196136	SERPINA3	B3KVQ7;hsa:12;P01011;Q13703;Q2TU87;Q2TU88;Q59GP9;Q6LBY8;Q6LDT7;Q6NSC9;Q8N177;Q96DW8;Q9UC47;Q9UNU9
22383700	4581720	61227700	NaN	NaN	6700,67	FALSE		8,22E+18	NaN	NaN	NaN	0	155,122	47	20	138	20	744	73,3	9,61	7832,21	215,37	13	20	P27658	Collagen alpha-1(VIII) chain OS=Homo sapiens OX=9606 GN=COL8A1 PE=1 SV=2	0	Pf00386, Pf01391	1295	ENSG00000144810	COL8A1	D3DN42;hsa:1295;P27658;Q53XI6;Q96D07
28815900	19418800	34091200	27633500	14742600	1262190	FALSE		7,13E+18	NaN	NaN	NaN	0	155,09	56	23	242	23	483	53,1	7,23	23438,4	412,46	15	23	P52209	6-phosphogluconate dehydrogenase, decarboxylating OS=Homo sapiens OX=9606 GN=PGD PE=1 SV=3	0	Pf00393, Pf03446	5226	ENSG00000142657	PGD	A8K2Y9;B4DQJ8;hsa:5226;P52209;Q9BWD8
5344130	6467800	5679780	10147400	4690180	4963870	FALSE	Acetyl [N-Term];Met-loss+Acetyl [N-Term]	-6,8E+18	NaN	NaN	NaN	0	153,984	52	28	200	28	612	68,2	6,73	19495,2	207,63	20	27	Q96G03	Phosphopentomutase OS=Homo sapiens OX=9606 GN=PGM2 PE=1 SV=4	0	Pf00408, Pf02878, Pf02879, Pf02880	55276	ENSG00000169299	PGM2	B4E0G8;hsa:55276;Q53FP5;Q5QTR0;Q96G03;Q9H0P9;Q9NV22
9671620	8293290	12222300	2038980	2218030	277660	FALSE		-5,16E+17	NaN	NaN	NaN	0	153,752	39	21	101	17	623	69,6	8,59	11377	161,27	16	21	O60506	Heterogeneous nuclear ribonucleoprotein Q OS=Homo sapiens OX=9606 GN=SYNCRIP PE=1 SV=2	4	Pf00076, Pf18360	10492	ENSG00000135316	SYNCRIP	E1P501;E1P502;hsa:10492;O60506;Q53H05;Q5TCG2;Q5TCG3;Q8IW78;Q8N599;Q96LC1;Q96LC2;Q9Y583
62529900	85769600	59221800	23537800	17559100	11967700	FALSE		-4,53E+17	NaN	NaN	NaN	0	153,169	88	16	279	16	187	21	7,53	30179,8	496,56	13	16	P30086	Phosphatidylethanolamine-binding protein 1 OS=Homo sapiens OX=9606 GN=PEBP1 PE=1 SV=3	0	Pf01161	5037	ENSG00000089220	PEBP1	B2R4S1;hsa:5037;P30086
5041460	8351090	8096800	90643,5	61520	981,633	FALSE		5,93E+18	NaN	NaN	NaN	0	153,004	41	28	118	26	858	96,8	5,39	11963,6	114,01	26	28	Q92598	Heat shock protein 105 kDa OS=Homo sapiens OX=9606 GN=HSPH1 PE=1 SV=1	1	Pf00012	10808	ENSG00000120694	HSPH1	B4DYH1;hsa:10808;O95739;Q5TBM6;Q5TBM7;Q5TBM8;Q92598;Q9UPC4
58589400	26696400	137177000	82462	188953	189092	FALSE		-4,42E+18	NaN	NaN	NaN	0	152,995	52	20	193	20	406	46	6,57	22401,9	260,87	19	20	Q9NRN5	Olfactomedin-like protein 3 OS=Homo sapiens OX=9606 GN=OLFML3 PE=2 SV=1	0	Pf02191	56944	ENSG00000116774	OLFML3	hsa:56944;Q53FR1;Q53HV9;Q5SQL6;Q69AX9;Q8NBJ2;Q9NRN5
11644300	7825940	14474200	7691460	4857430	263593	FALSE		8,73E+18	NaN	NaN	NaN	0	152,951	28	29	143	29	1357	156,2	5,64	14909,8	176,68	25	29	Q86UP2	Kinectin OS=Homo sapiens OX=9606 GN=KTN1 PE=1 SV=1	0	Pf05104	3895	ENSG00000126777	KTN1	B4DZ88;hsa:3895;Q13999;Q14707;Q15387;Q17RZ5;Q5GGW3;Q86UP2;Q86W57
26130900	10991200	27548100	NaN	77307,5	224507	FALSE		2,19E+18	NaN	NaN	NaN	0	152,798	31	22	134	22	750	83,9	5,2	14229,4	227,36	16	22	Q68BL8	Olfactomedin-like protein 2B OS=Homo sapiens OX=9606 GN=OLFML2B PE=2 SV=2	0	Pf02191	25903	ENSG00000162745	OLFML2B	B7ZA39;hsa:25903;Q5VU96;Q68BL8;Q6NX46;Q86X11;Q9Y3X6
15397000	21472200	13624500	2199380	1271280	80811,9	FALSE		-4,8E+18	NaN	NaN	NaN	0	152,472	53	21	127	20	414	46,6	7,01	13263,2	163,6	15	21	O75874	Isocitrate dehydrogenase [NADP] cytoplasmic OS=Homo sapiens OX=9606 GN=IDH1 PE=1 SV=2	1	Pf00180	3417	ENSG00000138413	IDH1	hsa:3417;O75874;Q567U4;Q6FHQ6;Q7Z3V0;Q93090;Q9NTJ9;Q9UKW8
64586900	77909200	71304900	38883700	36745000	5689560	FALSE	Met-loss+Acetyl [N-Term]	-6,94E+18	NaN	NaN	NaN	0	152,026	80	17	288	17	204	23,2	5,11	32104,8	395,43	12	17	P52565	Rho GDP-dissociation inhibitor 1 OS=Homo sapiens OX=9606 GN=ARHGDIA PE=1 SV=3	0	Pf02115	396	ENSG00000141522	ARHGDIA	A8MXW0;B2R5X1;B4DDD3;B4DUV9;hsa:396;P52565;Q6IBM5
25995700	23221700	42923400	3744370	2789250	206866	FALSE		8,12E+18	NaN	NaN	NaN	0	151,679	69	19	517	15	245	27,7	4,78	58775,7	544,29	16	19	P27348	14-3-3 protein theta OS=Homo sapiens OX=9606 GN=YWHAQ PE=1 SV=1	0	Pf00244	10971	ENSG00000134308	YWHAQ	D6W4Z5;hsa:10971;P27348;Q567U5;Q5TZU8;Q9UP48
9723320	3200080	21631300	646225	18653,7	NaN	FALSE		3,72E+18	NaN	NaN	NaN	0	151,476	43	21	113	21	603	68,9	8,59	9715,85	163,18	13	21	Q86SR1	Polypeptide N-acetylgalactosaminyltransferase 10 OS=Homo sapiens OX=9606 GN=GALNT10 PE=1 SV=2	0	Pf00535, Pf00652	55568	ENSG00000164574	GALNT10	B3KXC9;hsa:55568;Q6IN56;Q86SR1;Q86VP8;Q8IXJ2;Q8TEJ2;Q96IV2;Q9H8E1;Q9Y4M4
14370400	8576760	17736100	18905200	12651600	2707080	FALSE	Acetyl [N-Term];Met-loss+Acetyl [N-Term]	-1,04E+18	NaN	NaN	NaN	0	150,46	78	26	229	26	272	30,6	6	21826,1	254,04	21	25	P47756	F-actin-capping protein subunit beta OS=Homo sapiens OX=9606 GN=CAPZB PE=1 SV=5	0	Pf01115	100134958;100174717;100391719;100612860;101328180;101373790;102838979;102978446;105999265;107501791;109274221;12345;298584;832	ENSBGRG00000004529;ENSBMSG00010001914;ENSCAFG00845003322;ENSCWAG00000006602;ENSDLEG00000005923;ENSECAG00000009145;ENSFCAG00000008775;ENSMMNG00015007967;ENSMPUG00000016159;ENSPCTG00005017788;ENSPLOG00000013244;ENSPPRG00000024975;ENSPPYG00000001789;ENSPSNG00000001463;ENSSSCG00000003493;ENSUAMG00000028024;ENSUPAG00010013555	Capzb;CAPZB;LOC111154622	A0A1S3GLX3;A0A286ZU64;A0A2J8KEQ3;A0A2J8T2D9;A0A2U3ZCI2;A0A2U4A086;A0A2Y9ELP0;A0A2Y9GKN2;A0A2Y9K8L6;A0A2Y9LG10;A0A337SR88;A0A341BRY2;A0A384MR50;A0A3Q7N034;A0A452SVR4;A0A485N5R5;A0A5F5PR53;A0A6I9JY70;A0A6J2EQ97;A0A6J3B2G0;A0A6J3JNM1;A0A6P4WZH5;A0A6P5PCY5;A0A6P7DRM8;A0A7J8F693;A0A7J8K5T1;A0A8B7URY2;A0A8B8UAM1;A0A8B8XSL8;A0A8B9WLM3;A0A8C3W4F3;A0A8C6B6B9;A0A8C9D6I9;A0A8C9DX48;A0A8D2HUK6;A0A8I3MQR3;A0A…
NaN	220147	NaN	NaN	NaN	193244	FALSE		-2,75E+18	NaN	NaN	NaN	0	149,927	46	12	335	1	340	36,6	6,27	24037,3	556,69	7	12	P01877	Immunoglobulin heavy constant alpha 2 OS=Homo sapiens OX=9606 GN=IGHA2 PE=1 SV=4	0	Pf00047, Pf07654		ENSG00000211890	IGHA2	A0A075B6N7;P01877
7154600	9342760	9703290	541911	195009	227553	FALSE		5,66E+17	NaN	NaN	NaN	0	149,904	50	28	114	28	723	83,4	6,67	9797,79	150,28	17	28	P26639	Threonine--tRNA ligase 1, cytoplasmic OS=Homo sapiens OX=9606 GN=TARS1 PE=1 SV=3	0	Pf00587, Pf02824, Pf03129, Pf07973	6897	ENSG00000113407	TARS1	A8K8I1;B4DEG8;hsa:6897;P26639;Q96FP5;Q9BWA6
6655840	12027100	7845720	1043980	163784	534712	FALSE		7,22E+18	NaN	NaN	NaN	0	149,855	51	19	84	19	558	61,6	7,3	9753,14	145,08	14	19	P35052	Glypican-1 OS=Homo sapiens OX=9606 GN=GPC1 PE=1 SV=2	0	Pf01153	2817	ENSG00000063660	GPC1	B3KTD1;hsa:2817;P35052;Q53QM4
1194560	1011020	1685360	7000640	3820200	685032	FALSE		8,28E+18	NaN	NaN	NaN	0	149,369	11	31	125	31	4243	465,4	6,11	13024,2	110,12	27	31	Q86WI1	Fibrocystin-L OS=Homo sapiens OX=9606 GN=PKHD1L1 PE=2 SV=2	0	Pf01833, Pf07691, Pf10162	93035	ENSG00000205038	PKHD1L1	hsa:93035;Q567P2;Q86WI1;Q9UF27
2313070	1241590	1963070	11166200	25809900	1128640	FALSE		2,48E+18	NaN	NaN	NaN	0	149,3	39	25	118	25	843	93,5	6,48	10095,3	182,05	20	25	P10643	Complement component C7 OS=Homo sapiens OX=9606 GN=C7 PE=1 SV=2	0	Pf00057, Pf00084, Pf00090, Pf01823, Pf18434	730	ENSG00000112936	C7	A8K2T4;hsa:730;P10643;Q6P3T5;Q92489
14402200	16541600	17248800	31047700	71270500	8181500	FALSE		6,05E+18	NaN	NaN	NaN	0	148,947	73	14	138	14	147	15,9	5,76	7722,64	356,74	5	14	P02766	Transthyretin OS=Homo sapiens OX=9606 GN=TTR PE=1 SV=1	0	Pf00576	7276	ENSG00000118271	TTR	hsa:7276;P02766;Q549C7;Q6IB96;Q9UBZ6;Q9UCM9
8473480	2698770	9626700	427592	101626	1468490	FALSE	Met-loss+Acetyl [N-Term]	9,13E+18	NaN	NaN	NaN	0	148,818	38	22	117	22	1097	123,6	4,94	11174,3	151,45	15	21	O00410	Importin-5 OS=Homo sapiens OX=9606 GN=IPO5 PE=1 SV=4	0	Pf02985, Pf18808, Pf18816, Pf18829	3843	ENSG00000065150	IPO5	B4DZA0;hsa:3843;O00410;O15257;Q5T578;Q86XC7
19661700	4681940	11579000	26307600	10027700	1370480	FALSE	Acetyl [N-Term]	4,53E+18	NaN	NaN	NaN	0	148,335	82	19	245	19	289	32,1	6,95	25544,3	458,36	14	19	P00491	Purine nucleoside phosphorylase OS=Homo sapiens OX=9606 GN=PNP PE=1 SV=2	0	Pf01048	4860	ENSG00000198805	PNP	B2R8S5;D3DS00;hsa:4860;P00491;Q15160;Q5PZ03
5557670	5696170	11649900	364358	123428	297163	FALSE		9,91E+17	NaN	NaN	NaN	0	148,234	31	29	155	29	1144	131,1	7,58	15622,4	135,3	24	29	Q16706	Alpha-mannosidase 2 OS=Homo sapiens OX=9606 GN=MAN2A1 PE=1 SV=2	0	Pf01074, Pf07748, Pf09261	4124	ENSG00000112893	MAN2A1	hsa:4124;Q16706;Q16767
202039000	17638700	271212000	587571	262862	141250	FALSE		3,4E+18	NaN	NaN	NaN	0	148,002	48	12	159	12	258	27,9	7,15	17412,4	293,14	9	12	P22692	Insulin-like growth factor-binding protein 4 OS=Homo sapiens OX=9606 GN=IGFBP4 PE=1 SV=2	0	Pf00086, Pf00219	3487	ENSG00000141753	IGFBP4	A0N9W2;B4E351;hsa:3487;P22692;Q5U012;Q9UCL6
75810,8	327140	491996	13367700	28747900	6721540	FALSE		8,56E+18	NaN	NaN	NaN	0	147,507	72	18	126	18	312	36,4	5,87	13351,8	195,94	11	18	Q08830	Fibrinogen-like protein 1 OS=Homo sapiens OX=9606 GN=FGL1 PE=1 SV=3	0	Pf00147	2267	ENSG00000104760	FGL1	A6NKU4;hsa:2267;Q08830;Q4PJH9;Q53YF1;Q8NG32;Q96KW6;Q96QM6
11827400	7889040	26556900	1196160	3014690	76154,6	FALSE	Acetyl [N-Term];Met-loss+Acetyl [N-Term]	6,57E+17	NaN	NaN	NaN	0	147,422	43	22	135	22	649	71,4	4,45	13195,3	237,56	15	21	Q16643	Drebrin OS=Homo sapiens OX=9606 GN=DBN1 PE=1 SV=4	0	Pf00241	1627	ENSG00000113758	DBN1	A8MV58;B2RBG0;hsa:1627;Q16643;Q9UFZ5
392392	58136,8	406291	5365680	5351830	335330	FALSE		-5,83E+18	NaN	NaN	NaN	0	147,21	20	30	119	26	2137	246,3	5,27	12041,4	114,03	24	29	P11277	Spectrin beta chain, erythrocytic OS=Homo sapiens OX=9606 GN=SPTB PE=1 SV=5	1	Pf00307, Pf00435	6710	ENSG00000070182	SPTB	hsa:6710;P11277;Q15510;Q15519
8778500	12456800	8822350	3009630	4286910	854996	FALSE		-5,88E+18	NaN	NaN	NaN	0	147,034	41	22	152	22	550	61,5	5,4	17887	254,9	20	22	Q14247	Src substrate cortactin OS=Homo sapiens OX=9606 GN=CTTN PE=1 SV=2	0	Pf02218, Pf14604	2017	ENSG00000085733;ENSG00000288401	CTTN	hsa:2017;Q14247;Q8N707;Q96H99
22822000	1316660	28309900	3015,68	33374,1	30365,1	FALSE		6,21E+18	NaN	NaN	NaN	0	147,028	61	16	118	16	350	38,4	4,65	10149,5	216,12	10	16	Q9UBP4	Dickkopf-related protein 3 OS=Homo sapiens OX=9606 GN=DKK3 PE=1 SV=2	0	Pf04706	27122	ENSG00000050165	DKK3	A8K1I2;D3DQW1;hsa:27122;Q9UBP4;Q9ULB7
15046800	21571800	14610100	3464020	1783010	1712870	FALSE	Acetyl [N-Term];Met-loss+Acetyl [N-Term]	-5,95E+18	NaN	NaN	NaN	0	146,818	60	14	128	14	234	25,9	7,43	14309,1	265,32	7	13	P25787	Proteasome subunit alpha type-2 OS=Homo sapiens OX=9606 GN=PSMA2 PE=1 SV=2	0	Pf00227, Pf10584	5683	ENSG00000106588	PSMA2	hsa:5683;P25787;Q6ICS6;Q9BU45
30785400	48746700	40845700	1017850	19955600	2062510	TRUE		-8,2E+18	NaN	NaN	NaN	0	146,154	53	13	204	11	359	38,4	5,5	15585,2	469,02	9	13	P12763	SWISS-PROT:P12763 (Bos taurus) Alpha-2-HS-glycoprotein precursor	0	Pf00031	280988	ENSBTAG00000000522	AHSG	A6QLF7;bta:280988;P12763
4634780	4133380	6168270	2819120	5540250	27001,2	FALSE		3,39E+18	NaN	NaN	NaN	0	145,027	23	21	91	21	1461	159,9	6,54	9914,52	172,32	13	21	Q92859	Neogenin OS=Homo sapiens OX=9606 GN=NEO1 PE=1 SV=2	0	Pf00041, Pf06583, Pf07679, Pf13895, Pf13927	4756	ENSG00000067141	NEO1	B7ZKM9;B7ZKN0;hsa:4756;O00340;Q17RX1;Q92859
90739200	34253300	87453100	57043000	16353800	7615020	FALSE		5,02E+18	NaN	NaN	NaN	0	143,776	90	13	193	13	105	11,7	7,12	13541,2	313,63	9	13	P31949	Protein S100-A11 OS=Homo sapiens OX=9606 GN=S100A11 PE=1 SV=2	0	Pf00036, Pf01023	6282	ENSG00000163191	S100A11	hsa:6282;P31949;Q5VTK0
28335900	5548780	52452700	36026700	86454900	1939610	FALSE		-2,77E+18	NaN	NaN	NaN	0	143,683	67	16	244	7	172	19,8	4,84	26742,4	238,01	14	16	O14950	Myosin regulatory light chain 12B OS=Homo sapiens OX=9606 GN=MYL12B PE=1 SV=2	12	Pf08976, Pf13405	103910;10627	ENSG00000118680	MYL12B	D3DUH6;hsa:103910;O14950;Q13182;Q7Z5Z4
14991400	4286760	21127700	3163710	484398	168132	FALSE		-8,65E+18	NaN	NaN	NaN	0	142,719	31	22	133	22	894	95,3	8,76	14940,4	139,87	16	22	Q12906	Interleukin enhancer-binding factor 3 OS=Homo sapiens OX=9606 GN=ILF3 PE=1 SV=3	0	Pf00035, Pf07528	3609	ENSG00000129351	ILF3	A8K6F2;G5E9M5;hsa:3609;O43409;Q12906;Q6P1X1;Q86XY7;Q99544;Q99545;Q9BZH4;Q9BZH5;Q9NQ95;Q9NQ96;Q9NQ97;Q9NQ98;Q9NQ99;Q9NQA0;Q9NQA1;Q9NQA2;Q9NRN2;Q9NRN3;Q9NRN4;Q9UMZ9;Q9UN00;Q9UN84;Q9UNA2
62463800	70513300	82918300	3283020	4599900	3728540	FALSE	Met-loss+Acetyl [N-Term]	2,2E+18	NaN	NaN	NaN	0	142,678	89	14	144	14	154	16,8	5,24	15192,2	277,23	7	14	P63241	Eukaryotic translation initiation factor 5A-1 OS=Homo sapiens OX=9606 GN=EIF5A PE=1 SV=2	0	Pf01287	1984	ENSG00000132507;ENSG00000288145	EIF5A	A8K9A0;D3DTP2;hsa:1984;P10159;P63241;Q16182;Q7L7L3;Q7Z4L1;Q9D0G2
17151300	1028250	27098700	41970,1	22157,7	NaN	FALSE		-4,07E+18	NaN	NaN	NaN	0	142,531	20	17	107	17	1573	165,6	6,13	13142	216,94	11	17	A1L4H1	Soluble scavenger receptor cysteine-rich domain-containing protein SSC5D OS=Homo sapiens OX=9606 GN=SSC5D PE=1 SV=3	0	Pf00530	284297	ENSG00000179954	SSC5D	A1L4H1;B5MDQ5;C7S7T9;C7S7U0;hsa:284297;K7EP70
24671000	8759380	30217900	97319900	68999800	2245870	FALSE	Met-loss [N-Term]	-3,25E+18	NaN	NaN	NaN	0	142,515	83	20	247	20	224	25	6,38	25765,7	359,53	17	20	P30041	Peroxiredoxin-6 OS=Homo sapiens OX=9606 GN=PRDX6 PE=1 SV=3	0	Pf00578, Pf10417	9588	ENSG00000117592	PRDX6	A8JZY7;hsa:9588;P30041;P32077;Q5TAH4;Q5ZEZ8
8197800	10762600	15119500	483211	576026	189789	FALSE		-1,03E+18	NaN	NaN	NaN	0	142,35	57	23	117	23	548	59,6	5,6	15118,5	159,11	20	23	P50990	T-complex protein 1 subunit theta OS=Homo sapiens OX=9606 GN=CCT8 PE=1 SV=4	0	Pf00118	10694	ENSG00000156261	CCT8	A6NN54;B4DEM7;B4DQH4;hsa:10694;P50990;Q4VBP8
2583530	1975890	8565010	6020760	4490960	72143,4	FALSE		-1,74E+18	NaN	NaN	NaN	0	141,903	27	24	126	23	1375	151,2	5,29	12066	199,17	15	24	Q14112	Nidogen-2 OS=Homo sapiens OX=9606 GN=NID2 PE=1 SV=3	0	Pf00058, Pf00086, Pf06119, Pf07474, Pf12662, Pf12947	22795	ENSG00000087303	NID2	A8K6I7;B4DU19;hsa:22795;O43710;Q14112
12713400	13516800	16536800	2426140	3773040	121960	FALSE	Acetyl [N-Term];Met-loss+Acetyl [N-Term]	-2,55E+18	NaN	NaN	NaN	0	141,625	78	20	139	19	325	36,6	6,79	15191,5	192,71	14	19	P14550	Aldo-keto reductase family 1 member A1 OS=Homo sapiens OX=9606 GN=AKR1A1 PE=1 SV=3	0	Pf00248	10327	ENSG00000117448	AKR1A1	A8KAL8;D3DQ04;hsa:10327;P14550;Q6IAZ4
28183600	14962500	30147600	4388850	2599810	266336	FALSE		4,38E+18	NaN	NaN	NaN	0	141,287	68	18	174	18	240	26,8	4,73	19281,4	233,57	14	18	P51858	Hepatoma-derived growth factor OS=Homo sapiens OX=9606 GN=HDGF PE=1 SV=1	0	Pf00855	3068	ENSG00000143321	HDGF	B3KU21;D3DVC9;hsa:3068;P51858;Q5SZ07;Q5SZ08;Q5SZ09
251395000	36780400	205614000	158952000	99668700	6467140	FALSE	Acetyl [N-Term];Met-loss+Acetyl [N-Term]	3,01E+18	NaN	NaN	NaN	0	141,279	86	14	353	12	149	16,8	4,22	30675,3	469,68	9	13	P0DP25	Calmodulin-3 OS=Homo sapiens OX=9606 GN=CALM3 PE=1 SV=1	2	Pf13499	801;805;808	ENSG00000160014	CALM3	hsa:801;hsa:805;hsa:808;P02593;P0DP25;P62158;P70667;P99014;Q13942;Q53S29;Q61379;Q61380;Q96HK3
6419690	24044700	3039900	2556430	9651240	3313950	FALSE	Acetyl [N-Term];Met-loss+Acetyl [N-Term]	-2,15E+18	NaN	NaN	NaN	0	141,068	45	16	114	16	323	36,2	8,97	10414,9	195,13	13	15	Q13642	Four and a half LIM domains protein 1 OS=Homo sapiens OX=9606 GN=FHL1 PE=1 SV=4	0	Pf00412	2273	ENSG00000022267	FHL1	B7Z5T4;B7Z793;hsa:2273;O95212;Q13230;Q13642;Q13645;Q5JXI7;Q5M7Y6;Q6IB30;Q9NZ40;Q9UKZ8;Q9Y630
5629270	1492980	10651500	10140700	15308900	331537	FALSE		-7,17E+18	NaN	NaN	NaN	0	140,819	17	20	132	20	1429	158,4	7,31	14220	201,28	16	20	O75882	Attractin OS=Homo sapiens OX=9606 GN=ATRN PE=1 SV=2	0	Pf00059, Pf00431, Pf01344, Pf01437, Pf13964	8455	ENSG00000088812	ATRN	A8KAE5;hsa:8455;O60295;O75882;O95414;Q3MIT3;Q5TDA2;Q5TDA4;Q5VYW3;Q9NTQ3;Q9NTQ4;Q9NU01;Q9NZ57;Q9NZ58;Q9UC75;Q9UDF5
1245590	4157660	1646320	39353400	51072500	10043800	FALSE		-8,76E+17	NaN	NaN	NaN	0	140,792	61	22	168	22	298	34,2	6,05	16581,1	243,5	17	22	P25311	Zinc-alpha-2-glycoprotein OS=Homo sapiens OX=9606 GN=AZGP1 PE=1 SV=2	0	Pf00129, Pf07654	563	ENSG00000160862	AZGP1	D6W5T8;hsa:563;O60386;P25311;Q5XKQ4;Q8N4N0
12197800	5938910	21355100	2152790	1709160	221028	FALSE	Acetyl [N-Term];Met-loss+Acetyl [N-Term]	3,81E+18	NaN	NaN	NaN	0	140,726	51	21	99	12	429	49,4	6,81	10351,7	146,9	15	20	Q9NVA2	Septin-11 OS=Homo sapiens OX=9606 GN=SEPTIN11 PE=1 SV=3	9	Pf00735	55752	ENSG00000138758	SEPTIN11	B7Z7Z6;E9KL32;hsa:55752;Q4W5G1;Q7L4N1;Q96SP1;Q9NVA2;Q9UFY9
18914600	22554600	23424700	3538410	2891030	903460	FALSE	Met-loss+Acetyl [N-Term]	4,48E+18	NaN	NaN	NaN	0	140,59	78	23	169	22	316	35,8	6,98	12135,1	208,25	13	23	P15121	Aldo-keto reductase family 1 member B1 OS=Homo sapiens OX=9606 GN=AKR1B1 PE=1 SV=3	1	Pf00248	231	ENSG00000085662	AKR1B1	B2R8N3;hsa:231;P15121;Q5U031;Q6FGA4;Q6ICP2;Q9BS21;Q9UCI9
2269270	1286520	1960550	8184100	15163700	304020	FALSE		4,68E+18	NaN	NaN	NaN	0	140,408	34	21	122	17	890	99,8	5,74	11653,3	200,47	16	21	Q06033	Inter-alpha-trypsin inhibitor heavy chain H3 OS=Homo sapiens OX=9606 GN=ITIH3 PE=1 SV=2	3	Pf00092, Pf06668, Pf08487	3699	ENSG00000162267	ITIH3	hsa:3699;Q06033;Q3B7H5;Q53F06;Q6LAM2;Q99085
10270500	20510100	14216500	9700360	6941770	792106	FALSE	Acetyl [N-Term]	-1,87E+18	NaN	NaN	NaN	0	140,092	54	22	148	22	394	44,7	6,74	14099,1	199,67	17	22	P61160	Actin-related protein 2 OS=Homo sapiens OX=9606 GN=ACTR2 PE=1 SV=1	0	Pf00022	10097	ENSG00000138071	ACTR2	B2RCP5;D6W5F4;E9PF41;hsa:10097;O15142;P61160;Q96C82
12534200	8270750	9851370	2619020	6883080	263025	FALSE		-1,68E+18	NaN	NaN	NaN	0	140,066	71	21	207	21	376	42,6	5,27	23640,3	251,91	19	21	P35237	Serpin B6 OS=Homo sapiens OX=9606 GN=SERPINB6 PE=1 SV=3	0	Pf00079	5269	ENSG00000124570	SERPINB6	B2RBA8;hsa:5269;P35237;Q59F97;Q5TD06;Q7Z2Y7;Q96J44;Q9UDI7
44802200	17619500	51536100	80460100	48675600	13838100	FALSE	Met-loss [N-Term]	7,21E+18	NaN	NaN	NaN	0	139,098	84	11	176	11	108	11,9	8,16	25437,4	345,1	6	9	P62942	Peptidyl-prolyl cis-trans isomerase FKBP1A OS=Homo sapiens OX=9606 GN=FKBP1A PE=1 SV=2	0	Pf00254	2280	ENSG00000088832	FKBP1A	D3DVW6;hsa:2280;P20071;P62942;Q4VC47;Q6FGD9;Q6LEU3;Q9H103;Q9H566
22794500	12631600	35814400	6565940	11920100	535746	FALSE	Acetyl [N-Term];Met-loss+Acetyl [N-Term]	-3,51E+18	NaN	NaN	NaN	0	138,998	83	22	540	19	246	28,2	4,84	55839	471,22	19	21	Q04917	14-3-3 protein eta OS=Homo sapiens OX=9606 GN=YWHAH PE=1 SV=4	1	Pf00244	7533	ENSG00000128245	YWHAH	hsa:7533;Q04917
15544500	6755860	21619400	11550,7	94705,9	NaN	FALSE		3,15E+18	NaN	NaN	NaN	0	138,868	39	20	94	20	727	83,5	6,95	11970,5	157,16	14	20	Q02809	Procollagen-lysine,2-oxoglutarate 5-dioxygenase 1 OS=Homo sapiens OX=9606 GN=PLOD1 PE=1 SV=2	0	Pf03171	5351	ENSG00000083444	PLOD1	B4DR87;hsa:5351;Q02809;Q96AV9;Q9H132
65810700	6983640	99016800	37486,8	93279,3	28592	FALSE		4,92E+18	NaN	NaN	NaN	0	138,775	42	21	121	21	746	84,1	6,19	13686	202,71	13	21	Q96TA1	Protein Niban 2 OS=Homo sapiens OX=9606 GN=NIBAN2 PE=1 SV=3	0		64855	ENSG00000136830	NIBAN2	hsa:64855;Q4LE55;Q5VVW6;Q5VVW7;Q96TA1;Q9BUS2;Q9NT35
16637700	18704500	17663800	322210	19851,6	188928	FALSE		-1,41E+17	NaN	NaN	NaN	0	138,691	39	19	123	19	582	64,2	5,62	11390	166,04	16	19	Q96AY3	Peptidyl-prolyl cis-trans isomerase FKBP10 OS=Homo sapiens OX=9606 GN=FKBP10 PE=1 SV=1	0	Pf00254, Pf13202	60681	ENSG00000141756	FKBP10	hsa:60681;Q7Z3R4;Q96AY3;Q9H3N3;Q9H6J3;Q9H6N5;Q9UF89
2610820	384381	2030670	6512190	5180610	292870	FALSE		2,5E+18	NaN	NaN	NaN	0	138,324	36	24	213	15	949	104,5	5,06	21851,6	251,09	19	24	Q10567	AP-1 complex subunit beta-1 OS=Homo sapiens OX=9606 GN=AP1B1 PE=1 SV=3	0	Pf01602, Pf02883, Pf09066	162	ENSG00000100280	AP1B1	C9JRD1;F8WDL0;hsa:162;P78436;Q10567;Q20WL3;Q86X54
264411000	930986000	502796000	7021820	10353600	441600	FALSE		-3,67E+18	NaN	NaN	NaN	0	137,67	52	19	460	14	338	38,4	6,61	40913,2	513,05	14	19	P51884	Lumican OS=Homo sapiens OX=9606 GN=LUM PE=1 SV=2	6	Pf01462, Pf13516, Pf13855	4060	ENSG00000139329	LUM	B2R6R5;hsa:4060;P51884;Q96QM7
122233000	178028000	120530000	179385000	431335000	77792900	TRUE		-4,14E+18	NaN	NaN	NaN	0	137,338	50	10	469	10	231	24,4	7,18	56815,5	853,15	8	10	P00761 SWISS-PROT:P00761	Trypsin - Sus scrofa (Pig).	0	Pf00089
3916990	139995000	6796700	537592	453772	10522	FALSE		4,45E+18	NaN	NaN	NaN	0	137,31	59	28	111	28	528	59,1	7,05	11671,3	120,65	24	28	P54577	Tyrosine--tRNA ligase, cytoplasmic OS=Homo sapiens OX=9606 GN=YARS1 PE=1 SV=4	0	Pf00579, Pf01588	8565	ENSG00000134684	YARS1	B3KWK4;D3DPQ4;hsa:8565;O43276;P54577;Q53EN1
13784300	11030700	16367600	3962880	1789380	2449100	FALSE		3,26E+18	NaN	NaN	NaN	0	136,975	55	20	68	20	437	50,6	8,63	6374,88	113,95	13	20	Q16181	Septin-7 OS=Homo sapiens OX=9606 GN=SEPTIN7 PE=1 SV=2	0	Pf00735	989	ENSG00000122545	SEPTIN7	hsa:989;Q16181;Q52M76;Q6NX50
11665500	24212300	9284960	35342100	22318500	17302500	FALSE	Met-loss [N-Term]	5,39E+18	NaN	NaN	NaN	0	136,756	80	13	156	13	114	12,8	5,25	16016,5	311,45	10	11	O75368	Adapter SH3BGRL OS=Homo sapiens OX=9606 GN=SH3BGRL PE=1 SV=1	0	Pf04908	6451	ENSG00000131171	SH3BGRL	hsa:6451;O75368;Q3SYL1;Q5JT50;Q6FIE8;Q9H0N8
118478000	24348,8	145356000	80326,3	128567	74282,6	FALSE		-7,02E+18	NaN	NaN	NaN	0	136,222	47	11	130	11	240	25,3	7,81	11361,6	351,18	5	11	P24592	Insulin-like growth factor-binding protein 6 OS=Homo sapiens OX=9606 GN=IGFBP6 PE=1 SV=1	0	Pf00086, Pf00219	3489	ENSG00000167779	IGFBP6	hsa:3489;P24592;Q14492
17015700	3951760	15583300	19560700	13069900	3601170	FALSE	Acetyl [N-Term];Met-loss+Acetyl [N-Term]	-9,09E+18	NaN	NaN	NaN	0	136,208	41	17	164	17	437	50,1	6,67	14232,4	272,1	9	16	P26641	Elongation factor 1-gamma OS=Homo sapiens OX=9606 GN=EEF1G PE=1 SV=3	0	Pf00043, Pf00647, Pf02798	1937	ENSG00000254772	EEF1G	B4DTG2;hsa:1937;P26641;Q6PJ62;Q6PK31;Q96CU2;Q9P196
31894400	22747700	52418500	19406400	19192600	420622	FALSE	Met-loss [N-Term]	5,24E+18	NaN	NaN	NaN	0	136,028	73	15	242	15	210	23,3	5,64	28142,7	369,25	11	14	P09211	Glutathione S-transferase P OS=Homo sapiens OX=9606 GN=GSTP1 PE=1 SV=2	0	Pf02798, Pf14497	2950	ENSG00000084207	GSTP1	hsa:2950;O00460;P09211;Q15690;Q5TZY3
20461900	21250600	31347000	3603170	2302750	2927600	FALSE		-7,86E+18	NaN	NaN	NaN	0	135,849	17	20	99	20	1439	162	5,9	10395,7	141,66	13	20	Q15262	Receptor-type tyrosine-protein phosphatase kappa OS=Homo sapiens OX=9606 GN=PTPRK PE=1 SV=2	0	Pf00041, Pf00102, Pf00629, Pf07679	5796	ENSG00000152894;ENSG00000273993	PTPRK	B2RTQ8;B7ZMG0;hsa:5796;Q14763;Q15262;Q5TG10;Q5TG11
4684620	3181700	7065660	2937520	3046540	2185480	FALSE		6,15E+18	NaN	NaN	NaN	0	135,03	39	23	127	23	906	102,4	5,27	14447,4	181,55	18	23	P35606	Coatomer subunit beta' OS=Homo sapiens OX=9606 GN=COPB2 PE=1 SV=2	0	Pf00400, Pf04053	9276	ENSG00000184432	COPB2	B4DZI8;hsa:9276;P35606
70485900	24737800	66949700	52978000	34830700	3379240	FALSE		8,51E+18	NaN	NaN	NaN	0	134,753	75	14	205	14	189	19,9	6,79	20635,4	416,05	9	14	Q99497	Parkinson disease protein 7 OS=Homo sapiens OX=9606 GN=PARK7 PE=1 SV=2	0	Pf01965	11315	ENSG00000116288	PARK7	B2R4Z1;hsa:11315;O14805;Q6DR95;Q7LFU2;Q99497
3616920	1668680	5463480	2919210	11058800	19703,1	FALSE		-8,51E+18	NaN	NaN	NaN	0	133,125	67	14	221	5	172	19,8	4,92	25053,2	237,53	12	14	P24844	Myosin regulatory light polypeptide 9 OS=Homo sapiens OX=9606 GN=MYL9 PE=1 SV=4	0	Pf13405, Pf13833	10398	ENSG00000101335	MYL9	E1P5T6;hsa:10398;P24844;Q9BQL9;Q9BUF9;Q9H136
9041470	5135030	8102450	1781990	1315300	9185,54	FALSE		4,68E+18	NaN	NaN	NaN	0	132,444	45	16	75	16	650	72,5	5,74	5938,41	121,22	9	16	Q9H4A4	Aminopeptidase B OS=Homo sapiens OX=9606 GN=RNPEP PE=1 SV=2	0	Pf01433, Pf09127, Pf17900	6051	ENSG00000176393	RNPEP	hsa:6051;Q9BVM9;Q9H1D4;Q9H4A4;Q9NPT7
22487100	5270710	15647800	13985700	8720380	2419720	FALSE	Acetyl [N-Term]	-1,45E+18	NaN	NaN	NaN	0	132,249	71	16	169	16	348	38,5	6,19	14080,5	265,72	8	16	P40121	Macrophage-capping protein OS=Homo sapiens OX=9606 GN=CAPG PE=1 SV=2	0	Pf00626	822	ENSG00000042493	CAPG	B8ZZS7;D6W5K8;hsa:822;P40121;Q53SA7
63112400	43172300	111395000	94771,9	202763	4058410	FALSE		-4,97E+18	NaN	NaN	NaN	0	132,005	39	10	105	10	302	33,2	7,3	8089,15	246,05	6	10	O76061	Stanniocalcin-2 OS=Homo sapiens OX=9606 GN=STC2 PE=1 SV=1	0	Pf03298	8614	ENSG00000113739	STC2	hsa:8614;O76061
18867800	12863600	26191000	4238900	3565680	757456	FALSE		8,77E+18	NaN	NaN	NaN	0	131,939	43	19	181	19	585	65,3	5,27	22698,9	201,66	15	19	Q08380	Galectin-3-binding protein OS=Homo sapiens OX=9606 GN=LGALS3BP PE=1 SV=1	0	Pf00530, Pf07707	3959	ENSG00000108679	LGALS3BP	hsa:3959;Q08380;Q7M4S0;Q9UCH8;Q9UCH9;Q9UCI0
298368	86998,2	349653	188967	266633	30149	FALSE		-8,57E+18	NaN	NaN	NaN	0	131,763	49	14	182	1	450	49,9	5,1	18190,9	314,36	10	14	P0DPH8	Tubulin alpha-3D chain OS=Homo sapiens OX=9606 GN=TUBA3D PE=1 SV=1	0	Pf00091, Pf03953	113457	ENSG00000075886	TUBA3D	A6NJQ0;hsa:113457;P0DPH8;Q13748;Q5W099;Q6PEY3;Q96F18
44325600	28209800	45231800	11300500	6553000	937990	FALSE		5,63E+17	NaN	NaN	NaN	0	131,064	70	12	107	12	227	22,7	4,63	7634,96	311,15	5	12	P80723	Brain acid soluble protein 1 OS=Homo sapiens OX=9606 GN=BASP1 PE=1 SV=2	0	Pf05466	10409	ENSG00000176788	BASP1	B4DJA8;D3DTD5;hsa:10409;O43596;P80723;Q5U0S0;Q9BWA5
3385010	1282580	3524990	49984300	68271900	2191790	FALSE		8,13E+18	NaN	NaN	NaN	0	130,805	60	16	189	16	347	38,1	5,47	22430,5	275,26	12	16	O43866	CD5 antigen-like OS=Homo sapiens OX=9606 GN=CD5L PE=1 SV=1	0	Pf00530	922	ENSG00000073754	CD5L	A8K7M5;hsa:922;O43866;Q6UX63
1349460	46192,9	1748510	9129590	18674300	NaN	FALSE		6,23E+18	NaN	NaN	NaN	0	130,719	43	19	117	19	605	66	6,79	13318,3	157,45	17	19	P35858	Insulin-like growth factor-binding protein complex acid labile subunit OS=Homo sapiens OX=9606 GN=IGFALS PE=1 SV=1	0	Pf01462, Pf13855	3483	ENSG00000099769	IGFALS	B4DZY8;E9PGU3;hsa:3483;P35858
22209800	19430000	35135400	256715	58707,7	NaN	FALSE		8,12E+18	NaN	NaN	NaN	0	130,601	48	12	71	12	332	31,5	4,45	8336,15	188,55	8	12	P29966	Myristoylated alanine-rich C-kinase substrate OS=Homo sapiens OX=9606 GN=MARCKS PE=1 SV=4	0	Pf02063	4082	ENSG00000277443	MARCKS	E1P560;hsa:4082;P29966;Q2LA83;Q5TDB7
52716300	32906200	59800000	15967900	7718830	3835140	FALSE	Acetyl [N-Term];Met-loss+Acetyl [N-Term]	7,42E+18	NaN	NaN	NaN	0	129,748	93	16	137	16	135	15,2	7,01	14581,6	245,53	10	14	Q01469	Fatty acid-binding protein 5 OS=Homo sapiens OX=9606 GN=FABP5 PE=1 SV=3	0	Pf00061	2171	ENSG00000164687	FABP5	B2R4K0;hsa:2171;Q01469
7295750	11835200	11269500	1808340	901008	148699	FALSE		-7,24E+18	NaN	NaN	NaN	0	129,52	36	21	170	21	876	97,1	4,78	16309,5	150,88	14	21	Q14974	Importin subunit beta-1 OS=Homo sapiens OX=9606 GN=KPNB1 PE=1 SV=2	0	Pf00514, Pf03810	3837	ENSG00000108424	KPNB1	B7ZAV6;D3DTT3;hsa:3837;Q14637;Q14974;Q53XN2;Q96J27
2937980	1064640	2823590	17505500	26074700	107702	FALSE		-8,74E+18	NaN	NaN	NaN	0	129,373	40	14	109	14	576	62,2	7,55	11247	182,42	9	14	Q96PD5	N-acetylmuramoyl-L-alanine amidase OS=Homo sapiens OX=9606 GN=PGLYRP2 PE=1 SV=1	0	Pf01510	114770	ENSG00000161031	PGLYRP2	A8K050;A8K8C7;B2RMZ2;B7ZM33;hsa:114770;Q68CK1;Q96N74;Q96PD5;Q9UC60
1423740000	1899770000	2345590000	2021750000	1739020000	925024000	FALSE	Acetyl [N-Term];Met-loss+Acetyl [N-Term]	-5,78E+18	NaN	NaN	NaN	0	129,286	84	9	553	8	44	5,1	5,06	92631,7	612,66	7	7	P62328	Thymosin beta-4 OS=Homo sapiens OX=9606 GN=TMSB4X PE=1 SV=2	1	Pf01290	7114	ENSG00000205542	TMSB4X	hsa:7114;P01253;P01254;P62328;Q546P5;Q63576;Q9UE55
144945	20395,9	158595	37630400	42840000	4850440	FALSE		-3,37E+18	NaN	NaN	NaN	0	128,988	46	19	185	19	560	60,9	9,63	17489	295,85	13	19	P40197	Platelet glycoprotein V OS=Homo sapiens OX=9606 GN=GP5 PE=1 SV=1	0	Pf13855	2814	ENSG00000178732	GP5	D1MER9;hsa:2814;P40197
320232	377326	323388	107566000	119325000	5286070	FALSE		6,32E+18	NaN	NaN	NaN	0	128,71	26	17	203	17	652	71,5	6,29	17466,5	297,45	12	17	P07359	Platelet glycoprotein Ib alpha chain OS=Homo sapiens OX=9606 GN=GP1BA PE=1 SV=2	0	Pf01462, Pf13855	2811	ENSG00000185245	GP1BA	E7ES66;hsa:2811;P07359;Q14441;Q16469;Q8N1F3;Q8NG39;Q9HDC7;Q9UEK1;Q9UQS4
29301600	1123740	23854300	1101640	1013110	NaN	FALSE		-6,36E+18	NaN	NaN	NaN	0	128,611	56	17	103	17	383	42,6	8,46	9065,92	155,78	10	17	P36222	Chitinase-3-like protein 1 OS=Homo sapiens OX=9606 GN=CHI3L1 PE=1 SV=2	0	Pf00704	1116	ENSG00000133048	CHI3L1	B2R7B0;hsa:1116;P30923;P36222;Q8IVA4;Q96HI7
2078580	2039780	1170320	262290	822517	1432880	FALSE		-6,61E+18	NaN	NaN	NaN	0	128,573	46	26	102	20	639	65,4	8	10347,2	107,71	22	26	P35908	Keratin, type II cytoskeletal 2 epidermal OS=Homo sapiens OX=9606 GN=KRT2 PE=1 SV=2	3	Pf00038, Pf16208	3849	ENSG00000172867	KRT2	hsa:3849;P35908;Q4VAQ2
12088800	4754500	15078300	25580300	26047800	5596890	FALSE	Acetyl [N-Term];Met-loss+Acetyl [N-Term]	1,19E+18	NaN	NaN	NaN	0	128,41	88	20	155	19	268	30	5,14	15847	218,7	13	19	Q15691	Microtubule-associated protein RP/EB family member 1 OS=Homo sapiens OX=9606 GN=MAPRE1 PE=1 SV=3	1	Pf00307, Pf03271	22919	ENSG00000101367	MAPRE1	B2R6I7;E1P5M8;hsa:22919;Q15691;Q3KQS8
3575720	1959920	2554910	17660600	32280500	1114600	FALSE	Acetyl [N-Term]	4,77E+18	NaN	NaN	NaN	0	128,33	58	22	175	21	379	42,7	6,28	21584,6	242,39	19	22	P30740	Leukocyte elastase inhibitor OS=Homo sapiens OX=9606 GN=SERPINB1 PE=1 SV=1	1	Pf00079	1992	ENSG00000021355	SERPINB1	A8K5L2;B4DNT0;hsa:1992;P30740;Q53FB9;Q5W0E1;Q9UDF8
3873280	2525460	4191160	552311	195396	407010	FALSE		-1,05E+18	NaN	NaN	NaN	0	128,278	54	13	161	8	434	47,2	5,03	11042	368,7	6	13	P09104	Gamma-enolase OS=Homo sapiens OX=9606 GN=ENO2 PE=1 SV=3	0	Pf00113, Pf03952	2026	ENSG00000111674	ENO2	B7Z2X9;hsa:2026;P09104;Q96J33
6348400	2997770	7780720	7459100	6255110	1126100	FALSE		4,09E+18	NaN	NaN	NaN	0	128,15	34	24	205	15	937	104,5	5,38	20220,5	217,05	22	24	P63010	AP-2 complex subunit beta OS=Homo sapiens OX=9606 GN=AP2B1 PE=1 SV=1	9	Pf01602, Pf02883, Pf09066	163	ENSG00000006125	AP2B1	A6NJP3;hsa:163;P21851;P63010;Q7Z451;Q96J19
14492800	4729030	12870200	209853	216128	384093	FALSE		6,18E+18	NaN	NaN	NaN	0	126,824	48	17	95	17	430	47,5	9,01	8571,39	165,57	9	17	P00505	Aspartate aminotransferase, mitochondrial OS=Homo sapiens OX=9606 GN=GOT2 PE=1 SV=3	0	Pf00155	2806	ENSG00000125166	GOT2	B4DJA6;E7ERW2;hsa:2806;P00505;Q53FL3;Q9BWA3
27675100	57480100	33247600	269303000	269897000	172430000	FALSE		9,07E+18	NaN	NaN	NaN	0	126,212	44	10	317	10	128	13,9	8,79	38589,9	397,71	9	10	P02775	Platelet basic protein OS=Homo sapiens OX=9606 GN=PPBP PE=1 SV=3	0	Pf00048	5473	ENSG00000163736	PPBP	B2R5F3;hsa:5473;P02775;Q6IBJ8
NaN	NaN	NaN	NaN	NaN	NaN	FALSE		3,75E+18	NaN	NaN	NaN	0	125,827	51	15	133	1	275	29,2	9,48	14597,3	209,29	11	15	A0A2R8Y4L2	Heterogeneous nuclear ribonucleoprotein A1-like 3 OS=Homo sapiens OX=9606 GN=HNRNPA1L3 PE=4 SV=1	0	Pf00076, Pf11627		ENSG00000224578	HNRNPA1L3	A0A2R8Y4L2
23801300	22971100	41962400	4426010	3592900	2541750	FALSE	Acetyl [N-Term]	-5,51E+18	NaN	NaN	NaN	0	125,688	72	15	169	15	263	29,5	6,61	14989,5	252,88	11	15	P25786	Proteasome subunit alpha type-1 OS=Homo sapiens OX=9606 GN=PSMA1 PE=1 SV=1	0	Pf00227, Pf10584	5682	ENSG00000129084	PSMA1	A8K400;hsa:5682;P25786;Q53YE8;Q9BRV9
2114130	28214000	4057280	2458810	4348380	865049	FALSE	Acetyl [N-Term];Met-loss+Acetyl [N-Term]	8,21E+18	NaN	NaN	NaN	0	125,529	78	16	99	15	165	18,5	7,85	11062	106,91	14	15	P60981	Destrin OS=Homo sapiens OX=9606 GN=DSTN PE=1 SV=3	0	Pf00241	11034	ENSG00000125868	DSTN	B2R6N2;B4DYA6;hsa:11034;P18282;P60981;Q5W166;Q6IAW2
6587740	6247560	28463000	NaN	NaN	198071	FALSE		2,67E+18	NaN	NaN	NaN	0	125,407	54	18	94	18	387	43,1	8,15	10243,7	139,05	15	18	Q08431	Lactadherin OS=Homo sapiens OX=9606 GN=MFGE8 PE=1 SV=3	0	Pf00008, Pf00754	4240	ENSG00000140545	MFGE8	B2R6M7;F5GZN3;hsa:4240;Q08431;Q53FU9;Q7Z3D2;Q9BTL9
47469100	459203000	40013700	69851900	73483000	208598000	FALSE	Acetyl [N-Term];Met-loss+Acetyl [N-Term]	8,22E+18	NaN	NaN	NaN	0	124,724	90	8	180	8	93	10,4	4,93	28106	263,6	6	7	Q9H299	SH3 domain-binding glutamic acid-rich-like protein 3 OS=Homo sapiens OX=9606 GN=SH3BGRL3 PE=1 SV=1	0	Pf04908	83442	ENSG00000142669	SH3BGRL3	hsa:83442;Q5T122;Q9H299
3521430	7005400	4813040	10873200	11746800	9274590	FALSE	Acetyl [N-Term];Met-loss+Acetyl [N-Term]	-8,49E+18	NaN	NaN	NaN	0	124,601	66	22	121	22	325	37,2	8,05	10847,1	179,07	11	21	P48059	LIM and senescent cell antigen-like-containing domain protein 1 OS=Homo sapiens OX=9606 GN=LIMS1 PE=1 SV=4	0	Pf00412	3987	ENSG00000169756	LIMS1	B2RAJ4;B7Z483;B7Z7R3;B7Z907;hsa:3987;P48059;Q53TE0;Q9BS44
4432000	4772990	12479400	21258,6	44876,8	69844,7	FALSE		-7,08E+18	NaN	NaN	NaN	0	123,931	30	20	89	20	931	104,8	5,17	9991,89	143,88	16	20	O60462	Neuropilin-2 OS=Homo sapiens OX=9606 GN=NRP2 PE=1 SV=3	0	Pf00431, Pf00629, Pf00754, Pf11980	8828	ENSG00000118257	NRP2	A0A024R3W6;A0A024R412;E9PF66;hsa:8828;O14820;O14821;O60462;Q53TQ4;Q53TS3;Q7LBX6;Q7LBX7;Q9H2D4;Q9H2D5;Q9H2E2;Q9H2E3;Q9H2E4;X5D2Q8
4988420	6483110	4990260	12282600	9480970	7257410	FALSE		5,1E+18	NaN	NaN	NaN	0	122,173	69	20	165	20	313	34,8	5,6	15548,5	218,91	15	20	Q9HC38	Glyoxalase domain-containing protein 4 OS=Homo sapiens OX=9606 GN=GLOD4 PE=1 SV=1	0		51031	ENSG00000167699	GLOD4	D3DTG9;D3DTH1;hsa:51031;Q96B89;Q9H3J8;Q9HC37;Q9HC38;Q9NVN1
8152810	6144270	15833900	1624800	1352120	166001	FALSE		-1,61E+18	NaN	NaN	NaN	0	122,152	56	19	94	13	406	46,1	5,48	9957,26	130,31	13	19	P60842	Eukaryotic initiation factor 4A-I OS=Homo sapiens OX=9606 GN=EIF4A1 PE=1 SV=1	5	Pf00270, Pf00271	1973	ENSG00000161960	EIF4A1	B2R6L8;D3DTP9;hsa:1973;J3QLC4;P04765;P60842;Q5U018;Q61516
11117900	13179600	16813300	17955900	17101800	5994410	FALSE	Acetyl [N-Term];Met-loss+Acetyl [N-Term]	-8,65E+18	NaN	NaN	NaN	0	121,774	69	25	169	25	241	27,5	6,6	15516,7	193,02	20	24	P78417	Glutathione S-transferase omega-1 OS=Homo sapiens OX=9606 GN=GSTO1 PE=1 SV=2	0	Pf13417, Pf14497	9446	ENSG00000148834	GSTO1	D3DRA3;F5H7H0;hsa:9446;P78417;Q5TA03;Q7Z3T2
2651850	2684190	10550000	10506,8	NaN	NaN	FALSE		-3,96E+18	NaN	NaN	NaN	0	121,699	22	19	67	18	1303	139,3	6,07	4684,36	105,35	10	19	Q9NS15	Latent-transforming growth factor beta-binding protein 3 OS=Homo sapiens OX=9606 GN=LTBP3 PE=1 SV=4	0	Pf00683, Pf07645, Pf12661, Pf12662	4054	ENSG00000168056	LTBP3	hsa:4054;O15107;Q96HB9;Q9H7K2;Q9NS15;Q9UFN4
9957240	3983270	19862900	3994470	3064010	353184	FALSE		7,23E+18	NaN	NaN	NaN	0	121,001	31	17	95	17	895	97,4	8,56	7305,98	180,25	8	17	Q14118	Dystroglycan 1 OS=Homo sapiens OX=9606 GN=DAG1 PE=1 SV=2	0	Pf05345, Pf05454, Pf18424	1605	ENSG00000173402	DAG1	A8K6M7;hsa:1605;Q14118;Q969J9
17003700	5932790	19110200	1498340	779952	147839	FALSE	Met-loss [N-Term]	-5,05E+17	NaN	NaN	NaN	0	120,885	64	18	104	18	413	46,2	7,01	11852,3	157,91	11	17	P17174	Aspartate aminotransferase, cytoplasmic OS=Homo sapiens OX=9606 GN=GOT1 PE=1 SV=3	0	Pf00155	2805	ENSG00000120053	GOT1	B2R6R7;B7Z7E9;hsa:2805;P17174;Q5VW80
7122950	901718	8938200	49344000	50012000	1534200	FALSE		-8,35E+18	NaN	NaN	NaN	0	120,865	51	16	173	16	545	60,5	5,99	12723,9	248,68	10	16	P22792	Carboxypeptidase N subunit 2 OS=Homo sapiens OX=9606 GN=CPN2 PE=1 SV=3	0	Pf13855	1370	ENSG00000178772	CPN2	B2RPE7;hsa:1370;P22792;Q86SU4;Q8N5V4
4663990	2331120	8092500	1450130	590913	332568	FALSE	Acetyl [N-Term];Met-loss+Acetyl [N-Term]	2,21E+18	NaN	NaN	NaN	0	120,629	34	20	99	20	609	69,8	6,64	13086,9	110,62	19	19	P12956	X-ray repair cross-complementing protein 6 OS=Homo sapiens OX=9606 GN=XRCC6 PE=1 SV=2	0	Pf02037, Pf02735, Pf03730, Pf03731	2547	ENSG00000196419	XRCC6	B1AHC8;hsa:2547;P12956;Q6FG89;Q9UCQ2;Q9UCQ3
5282550	3062930	12185300	706119	386756	2746,57	FALSE	Acetyl [N-Term]	-5,9E+18	NaN	NaN	NaN	0	120,143	39	23	85	23	908	100,1	5,2	6404,33	110,01	15	23	Q13200	26S proteasome non-ATPase regulatory subunit 2 OS=Homo sapiens OX=9606 GN=PSMD2 PE=1 SV=3	0	Pf01851, Pf17781, Pf18051	5708	ENSG00000175166	PSMD2	B4DX07;B4DXY1;E7EW34;E9PCS3;hsa:5708;Q12932;Q13200;Q15321;Q53XQ4;Q96I12
8164510	12522400	14312900	1132020	651384	84404,1	FALSE	Acetyl [N-Term];Met-loss+Acetyl [N-Term]	3,95E+18	NaN	NaN	NaN	0	120,131	67	20	93	20	394	43,8	6,55	8493,62	158,39	11	19	Q9UQ80	Proliferation-associated protein 2G4 OS=Homo sapiens OX=9606 GN=PA2G4 PE=1 SV=3	0	Pf00557	5036	ENSG00000170515	PA2G4	hsa:5036;O43846;Q9UM59;Q9UQ80
2597400	3261610	5540520	33762,9	43442,9	36361,3	FALSE		-7,88E+18	NaN	NaN	NaN	0	119,398	9	24	80	24	4588	506	5	6811,66	114,19	15	24	Q14517	Protocadherin Fat 1 OS=Homo sapiens OX=9606 GN=FAT1 PE=1 SV=2	0	Pf00008, Pf00028, Pf02210	2195	ENSG00000083857	FAT1	hsa:2195;Q14517
18328100	18546600	22162500	2784990	5187860	219052	FALSE	Acetyl [N-Term]	5,28E+18	NaN	NaN	NaN	0	119,363	51	15	121	15	261	29,7	7,05	11070,2	173,01	13	15	Q14847	LIM and SH3 domain protein 1 OS=Homo sapiens OX=9606 GN=LASP1 PE=1 SV=2	0	Pf00412, Pf00880, Pf14604	3927	ENSG00000002834	LASP1	B4DGQ0;hsa:3927;Q14847;Q96ED2;Q96IG0
22401900	4707470	25259900	85822,2	63769	57683,1	FALSE		-2,08E+18	NaN	NaN	NaN	0	119,049	14	11	82	10	1669	160,5	8,28	5182,35	182,6	5	11	P02462	Collagen alpha-1(IV) chain OS=Homo sapiens OX=9606 GN=COL4A1 PE=1 SV=4	1	Pf01391, Pf01413	1282	ENSG00000187498	COL4A1	A7E2W4;B1AM70;F5H5K0;hsa:1282;P02462;Q1P9S9;Q5VWF6;Q86X41;Q8NF88;Q9NYC5
16627500	1829810	18318600	2698900	3196980	83133,7	FALSE	Acetyl [N-Term];Met-loss+Acetyl [N-Term]	-8,81E+18	NaN	NaN	NaN	0	118,825	53	14	87	12	281	31,1	5,01	9241,48	159,23	8	13	P29692	Elongation factor 1-delta OS=Homo sapiens OX=9606 GN=EEF1D PE=1 SV=5	2	Pf00736, Pf10587	1936	ENSG00000104529;ENSG00000273594	EEF1D	B4DDU4;D3DWK3;E9PBQ9;hsa:1936;P29692;Q4VBZ6;Q969J1;Q96I38
5471290	5267750	5909590	7977370	8019070	2826350	FALSE	Met-loss [N-Term]	-5,37E+18	NaN	NaN	NaN	0	118,388	66	15	140	15	239	26,5	7,81	14798,3	226,52	11	14	P54819	Adenylate kinase 2, mitochondrial OS=Homo sapiens OX=9606 GN=AK2 PE=1 SV=2	0	Pf00406, Pf05191	204	ENSG00000004455	AK2	A8K6L1;B4DHH7;B4DL64;hsa:204;P54819;Q16856;Q5EB54;Q5TIF7;Q8TCY2;Q8TCY3
1799160	4212140	2276350	2741440	10023800	682278	FALSE		-8,45E+18	NaN	NaN	NaN	0	118,382	49	23	108	23	625	70,1	8,1	10347,4	102,83	18	23	P03951	Coagulation factor XI OS=Homo sapiens OX=9606 GN=F11 PE=1 SV=1	0	Pf00024, Pf00089	2160	ENSG00000088926	F11	D3DP64;hsa:2160;P03951;Q4W5C2;Q9Y495
86120100	70872000	166275000	2723940	4270580	1148050	FALSE		4,49E+18	NaN	NaN	NaN	0	118,319	61	10	214	10	146	15,8	8,75	27828,5	274,16	7	10	P01034	Cystatin-C OS=Homo sapiens OX=9606 GN=CST3 PE=1 SV=1	0	Pf00031	1471	ENSG00000101439	CST3	B2R5J9;D3DW42;hsa:1471;P01034;Q6FGW9
14196800	10794300	16361900	729831	1765620	41053,4	FALSE		1,62E+18	NaN	NaN	NaN	0	118,024	82	14	123	12	225	24,7	4,67	15762,8	205,13	9	14	P24534	Elongation factor 1-beta OS=Homo sapiens OX=9606 GN=EEF1B2 PE=1 SV=3	0	Pf00736, Pf10587	1933	ENSG00000114942;ENSG00000283391	EEF1B2	A8K795;hsa:1933;P24534;Q6IBH9
692631	321053	624946	18817000	13738300	6826160	FALSE		4,77E+18	NaN	NaN	NaN	0	117,979	37	14	120	14	500	55	5,71	13210,9	167,28	10	14	O94919	Endonuclease domain-containing 1 protein OS=Homo sapiens OX=9606 GN=ENDOD1 PE=1 SV=2	0	Pf01223	23052	ENSG00000149218	ENDOD1	A8K6K8;hsa:23052;O94919;Q6GQY5;Q8TAQ8
6774950	3888450	5789200	573813	604004	197979	FALSE		-5,38E+18	NaN	NaN	NaN	0	117,657	42	17	71	17	583	65,1	6,25	6869,46	109,81	11	17	Q13740	CD166 antigen OS=Homo sapiens OX=9606 GN=ALCAM PE=1 SV=2	0	Pf08205, Pf13927	214	ENSG00000170017	ALCAM	B2RNS3;B4DTU0;hsa:214;O60892;Q13740;Q1HGM8;Q1HGM9;Q6PEY4;Q6ZS95
NaN	146169	NaN	NaN	NaN	NaN	FALSE		-2,33E+18	NaN	NaN	NaN	0	117,403	9	19	283	2	1972	227,2	5,5	33018,7	417,1	19	18	P35749	Myosin-11 OS=Homo sapiens OX=9606 GN=MYH11 PE=1 SV=3	0	Pf00063, Pf01576, Pf02736	4629	ENSG00000133392;ENSG00000276480	MYH11	D2JYH7;hsa:4629;O00396;O94944;P35749;P78422;Q3MIV8;Q3MNF0;Q3MNF1
8365980	10015800	10273000	1246550	1150440	94270,1	FALSE	Acetyl [N-Term];Met-loss+Acetyl [N-Term]	-3,1E+18	NaN	NaN	NaN	0	117,339	73	15	66	15	258	27,3	6,4	5615,34	108,12	8	14	Q9UKY7	Protein CDV3 homolog OS=Homo sapiens OX=9606 GN=CDV3 PE=1 SV=1	0	Pf15359	55573	ENSG00000091527	CDV3	B3KUC2;hsa:55573;Q96IP9;Q9UKY7
4922720	8091780	10295200	1490380	2328410	850984	FALSE		3,6E+18	NaN	NaN	NaN	0	116,961	41	11	78	9	215	24,9	5,74	11550,9	132,57	10	11	P09429	High mobility group protein B1 OS=Homo sapiens OX=9606 GN=HMGB1 PE=1 SV=3	2	Pf00505, Pf09011	3146	ENSG00000189403	HMGB1	A5D8W9;hsa:3146;P09429;Q14321;Q5T7C3;Q6IBE1
5416880	2004670	7969270	1383400	949372	221548	FALSE		6,56E+18	NaN	NaN	NaN	0	116,329	25	21	81	21	1224	138,3	7,66	10539,4	112,85	15	21	P53621	Coatomer subunit alpha OS=Homo sapiens OX=9606 GN=COPA PE=1 SV=2	0	Pf00400, Pf04053, Pf06957, Pf12894	1314	ENSG00000122218	COPA	hsa:1314;P53621;Q5T201;Q8IXZ9
2527490	2256360	1605200	18396300	55680800	848686	FALSE		-7,86E+18	NaN	NaN	NaN	0	116,223	68	15	118	14	355	39,7	5,22	8419,21	193,64	9	15	P27169	Serum paraoxonase/arylesterase 1 OS=Homo sapiens OX=9606 GN=PON1 PE=1 SV=3	1	Pf01731	5444	ENSG00000005421	PON1	B2RA40;hsa:5444;P27169;Q16052;Q6B0J6;Q9UCB1
5067640	3759300	7092580	100781	76417,4	129472	FALSE		5,56E+18	NaN	NaN	NaN	0	115,707	38	20	84	20	679	73,6	6,16	10565	100,03	17	20	P38646	Stress-70 protein, mitochondrial OS=Homo sapiens OX=9606 GN=HSPA9 PE=1 SV=2	0	Pf00012	3313	ENSG00000113013	HSPA9	B2RCM1;hsa:3313;P30036;P31932;P38646;Q1HB43;Q53H23;Q6GU03;Q9BWB7;Q9UC56
12483000	5820380	10746900	19396,7	27356,4	26981,6	FALSE	Acetyl [N-Term];Met-loss+Acetyl [N-Term]	5,01E+18	NaN	NaN	NaN	0	115,678	61	15	86	14	329	36,4	6,05	8909,82	129,06	12	14	Q15417	Calponin-3 OS=Homo sapiens OX=9606 GN=CNN3 PE=1 SV=1	0	Pf00307, Pf00402	1266	ENSG00000117519	CNN3	B4DFK6;B4DP09;F8WA86;hsa:1266;Q15417;Q6FHA7
8553900	9222400	5746680	530858	270186	287982	FALSE		-8,79E+18	NaN	NaN	NaN	0	115,626	60	21	91	21	519	56,1	7,93	8849,34	126,78	14	21	P28838	Cytosol aminopeptidase OS=Homo sapiens OX=9606 GN=LAP3 PE=1 SV=3	0	Pf00883, Pf02789	51056	ENSG00000002549	LAP3	B3KMQ3;hsa:51056;P28838;Q6IAM6;Q6P0L6;Q9UQE3
6789310	3734550	5015310	2438140	2174200	68328,5	FALSE	Met-loss [N-Term]	8,69E+17	NaN	NaN	NaN	0	115,206	46	22	97	22	511	57,2	6,21	11135,8	111,13	17	21	P48444	Coatomer subunit delta OS=Homo sapiens OX=9606 GN=ARCN1 PE=1 SV=1	0	Pf00928, Pf01217	372	ENSG00000095139	ARCN1	B4E1X2;E9PEU4;hsa:372;P48444;Q52M80
4240920	3713340	5203290	73211600	41260300	8004130	FALSE		4,87E+18	NaN	NaN	NaN	0	115,098	44	18	121	18	461	51	6,68	14193	176,57	14	18	P31146	Coronin-1A OS=Homo sapiens OX=9606 GN=CORO1A PE=1 SV=4	0	Pf00400, Pf08953, Pf08954, Pf16300	11151	ENSG00000102879	CORO1A	B2RBL1;hsa:11151;P31146;Q2YD73
18656900	9866590	30661000	14494800	9524350	2045230	FALSE	Met-loss [N-Term]	8,55E+18	NaN	NaN	NaN	0	115,07	73	21	188	21	300	34,3	7,36	20133,8	234,4	16	20	O15144	Actin-related protein 2/3 complex subunit 2 OS=Homo sapiens OX=9606 GN=ARPC2 PE=1 SV=1	0	Pf04045	10109	ENSG00000163466	ARPC2	hsa:10109;O15144;Q92801;Q9P1D4
11034700	6610330	11729200	28585400	16939800	2936100	FALSE		3,68E+18	NaN	NaN	NaN	0	114,918	39	17	201	12	535	60,8	6,57	17693,4	333,92	10	17	Q9NZN3	EH domain-containing protein 3 OS=Homo sapiens OX=9606 GN=EHD3 PE=1 SV=2	5	Pf00350, Pf12763, Pf16880, Pf18150	30845	ENSG00000013016	EHD3	B4DFR5;D6W574;hsa:30845;Q8N514;Q9NZB3;Q9NZN3
16422400	6366190	21470500	33607700	38827000	4158180	FALSE	Met-loss+Acetyl [N-Term]	8,05E+18	NaN	NaN	NaN	0	114,724	78	18	198	17	198	21,9	5,97	18269,1	317,71	13	18	P32119	Peroxiredoxin-2 OS=Homo sapiens OX=9606 GN=PRDX2 PE=1 SV=5	0	Pf00578, Pf10417	7001	ENSG00000167815	PRDX2	A8K0C0;hsa:7001;P31945;P32118;P32119;P35701;Q6FHG4;Q92763;Q9UC23
80920600	27815400	107422000	14518500	13146000	1271890	FALSE	Met-loss+Acetyl [N-Term]	-8,43E+18	NaN	NaN	NaN	0	114,416	90	12	206	7	152	17,1	6,19	21174,9	270,9	10	12	P15531	Nucleoside diphosphate kinase A OS=Homo sapiens OX=9606 GN=NME1 PE=1 SV=1	6	Pf00334	4830	ENSG00000239672	NME1	hsa:4830;P15531;Q6FGK3;Q86XQ2;Q9UDJ6
5275110	4543160	7396910	285995	297154	NaN	FALSE	Acetyl [N-Term];Met-loss+Acetyl [N-Term]	-5,37E+18	NaN	NaN	NaN	0	113,179	41	18	63	18	597	68	6,35	5811,94	102,06	10	16	Q15046	Lysine--tRNA ligase OS=Homo sapiens OX=9606 GN=KARS1 PE=1 SV=3	0	Pf00152, Pf01336	3735	ENSG00000065427	KARS1	A8MSK1;D3DUK4;hsa:3735;O14946;Q15046;Q96J25;Q9HB23
3886000	6833150	8135020	269907	211781	NaN	FALSE		6,94E+18	NaN	NaN	NaN	0	113,124	53	22	81	22	545	60,5	6,49	6710,59	87,27	15	22	P49368	T-complex protein 1 subunit gamma OS=Homo sapiens OX=9606 GN=CCT3 PE=1 SV=4	0	Pf00118	7203	ENSG00000163468	CCT3	A6NE14;hsa:7203;P49368;Q5SZY1;Q9BR64
5054700	5506900	7177200	1729760	1374300	286431	FALSE		3,45E+18	NaN	NaN	NaN	0	112,998	25	21	111	21	868	96	6,52	10495,8	103,42	18	21	Q8WUM4	Programmed cell death 6-interacting protein OS=Homo sapiens OX=9606 GN=PDCD6IP PE=1 SV=1	0	Pf03097, Pf13949	10015	ENSG00000170248	PDCD6IP	C5MQH7;E9PFU1;hsa:10015;Q6NUS1;Q8WUM4;Q9BX86;Q9NUN0;Q9P2H2;Q9UKL5
4846000	3407340	8560970	15565,2	29193,6	6881,4	FALSE		-2,62E+18	NaN	NaN	NaN	0	112,993	35	16	61	16	788	85,2	4,3	5547,89	101,86	10	16	P49321	Nuclear autoantigenic sperm protein OS=Homo sapiens OX=9606 GN=NASP PE=1 SV=2	0	Pf10516	4678	ENSG00000132780	NASP	A8K6H2;B4DQP3;D3DQ07;F5H3J2;hsa:4678;P49321;Q53GW5;Q5T622;Q5T625;Q96A69;Q9BTW2
18101700	26537600	29232700	598914	578436	141066	FALSE		-6,26E+18	NaN	NaN	NaN	0	112,962	55	14	108	14	217	24,8	9,94	13300,3	147,3	12	14	P62906	60S ribosomal protein L10a OS=Homo sapiens OX=9606 GN=RPL10A PE=1 SV=2	0	Pf00687	4736	ENSG00000198755	RPL10A	B2R801;hsa:4736;P52859;P53025;P62906;Q5TZT6;Q8J013
10118500	4090320	9185050	282376	55853,5	2857,87	FALSE	Acetyl [N-Term];Met-loss+Acetyl [N-Term]	-3,36E+18	NaN	NaN	NaN	0	112,845	73	20	87	20	397	41,9	8,09	8939,61	128,13	11	19	P42765	3-ketoacyl-CoA thiolase, mitochondrial OS=Homo sapiens OX=9606 GN=ACAA2 PE=1 SV=2	0	Pf00108, Pf02803	10449	ENSG00000167315	ACAA2	hsa:10449;P42765;Q9BUT6
17899400	7398420	20446800	1761840	2084280	503416	FALSE		3,6E+18	NaN	NaN	NaN	0	112,701	33	22	129	22	710	76,6	4,7	11717,9	179,54	18	22	P19338	Nucleolin OS=Homo sapiens OX=9606 GN=NCL PE=1 SV=3	0	Pf00076	4691	ENSG00000115053	NCL	hsa:4691;P19338;Q53SK1;Q8NB06;Q9UCF0;Q9UDG1
12651900	24564800	14434600	5567690	5152770	3471000	FALSE		9,19E+18	NaN	NaN	NaN	0	112,422	67	16	131	16	261	29,5	7,72	14715,6	196,15	13	15	P25789	Proteasome subunit alpha type-4 OS=Homo sapiens OX=9606 GN=PSMA4 PE=1 SV=1	0	Pf00227, Pf10584	5685	ENSG00000041357	PSMA4	D3DW86;hsa:5685;P25789;Q53XP2;Q567Q5;Q8TBD1
5862560	4668450	13527800	185317	73195,4	469972	FALSE		2,65E+18	NaN	NaN	NaN	0	112,402	33	17	68	17	718	82,2	6,55	8717,19	114,81	12	17	Q93063	Exostosin-2 OS=Homo sapiens OX=9606 GN=EXT2 PE=1 SV=1	0	Pf03016, Pf09258	2132	ENSG00000151348	EXT2	B2R5Z6;C9JU51;hsa:2132;J3KPT2;O15288;Q93063
33867600	81692600	33501800	624449000	925753000	194132000	FALSE		8,48E+18	NaN	NaN	NaN	0	112,364	53	10	304	5	216	22,8	6,76	33892,5	381,95	9	10	P0DOX8	Immunoglobulin lambda-1 light chain OS=Homo sapiens OX=9606 PE=1 SV=1	5	Pf07654, Pf07686
33618700	6655400	26631200	517467	225707	145432	FALSE		1,18E+18	NaN	NaN	NaN	0	111,506	36	19	88	19	653	72,9	6,47	9381,54	117	14	19	P33908	Mannosyl-oligosaccharide 1,2-alpha-mannosidase IA OS=Homo sapiens OX=9606 GN=MAN1A1 PE=1 SV=3	0	Pf01532	4121	ENSG00000111885	MAN1A1	E7EU32;hsa:4121;P33908;Q6P052;Q9NU44;Q9UJI3
7007070	5412560	7151230	26405100	26689400	13222500	FALSE		7,5E+18	NaN	NaN	NaN	0	111,154	67	15	178	3	330	37,6	7,39	16514,6	277,93	10	15	Q03591	Complement factor H-related protein 1 OS=Homo sapiens OX=9606 GN=CFHR1 PE=1 SV=2	6	Pf00084	3078	ENSG00000244414	CFHR1	A8K465;hsa:3078;Q03591;Q3B774;Q9UJ17
26911700	21083000	39248400	7658570	7891380	6402060	FALSE		8,39E+18	NaN	NaN	NaN	0	111,065	37	19	178	19	524	58,1	5,17	18591,8	217,31	17	19	P07602	Prosaposin OS=Homo sapiens OX=9606 GN=PSAP PE=1 SV=2	0	Pf02199, Pf03489, Pf05184	5660	ENSG00000197746	PSAP	hsa:5660;P07292;P07602;P15793;P78538;P78541;P78546;P78547;P78558;Q53Y86;Q6IBQ6;Q92739;Q92740;Q92741;Q92742
250750000	600132000	502825000	36516200	42335200	19511300	FALSE		-2,76E+18	NaN	NaN	NaN	0	111	71	9	211	9	119	13,7	6,52	13964,5	474,48	6	9	P61769	Beta-2-microglobulin OS=Homo sapiens OX=9606 GN=B2M PE=1 SV=1	0	Pf07654	567	ENSG00000166710;ENSG00000273686	B2M	hsa:567;P01884;P61769;Q540F8;Q6IAT8;Q9UCK0;Q9UD48;Q9UDF4
17705400	17737800	23786400	43557300	70604300	2259350	FALSE		-4,38E+18	NaN	NaN	NaN	0	110,84	55	24	219	24	499	57	6,9	20775,7	310,25	21	24	P05546	Heparin cofactor 2 OS=Homo sapiens OX=9606 GN=SERPIND1 PE=1 SV=3	0	Pf00079	3053	ENSG00000099937	SERPIND1	B2RAI1;D3DX34;hsa:3053;P05546;Q6IBZ5
42822200	92635100	53257500	13465400	9434800	11580100	FALSE		6,12E+18	NaN	NaN	NaN	0	110,734	44	16	208	16	334	36,4	7,36	23101,8	305,05	15	16	P40925	Malate dehydrogenase, cytoplasmic OS=Homo sapiens OX=9606 GN=MDH1 PE=1 SV=4	0	Pf00056, Pf02866	4190	ENSG00000014641	MDH1	B2R5V5;B4DUN2;B7Z3I7;F5H098;hsa:4190;P40925;Q6I9V0
9719870	31530600	16802600	24258100	21467400	8043240	FALSE		5,47E+18	NaN	NaN	NaN	0	110,17	45	19	178	19	337	37,5	6,81	18956,8	200,31	19	19	P37837	Transaldolase OS=Homo sapiens OX=9606 GN=TALDO1 PE=1 SV=2	0	Pf00923	6888	ENSG00000177156	TALDO1	B2R8M2;hsa:6888;O00751;P37837;Q8WV32;Q8WZ45
6387970	3869270	10961800	813887	1415940	52647,4	FALSE		7,44E+18	NaN	NaN	NaN	0	110,124	39	18	85	18	736	83,3	5,14	8762,48	143,47	10	18	Q32P28	Prolyl 3-hydroxylase 1 OS=Homo sapiens OX=9606 GN=P3H1 PE=1 SV=2	0	Pf13640	64175	ENSG00000117385	P3H1	hsa:64175;Q32P28;Q7KZR4;Q96BR8;Q96SK8;Q96SL5;Q96SN3;Q9H6K3;Q9HC86;Q9HC87
10071600	32543000	28753600	245604000	161073000	44352000	FALSE		1,98E+18	NaN	NaN	NaN	0	110,03	89	9	379	5	106	11,3	7,24	43120,5	471,03	7	9	P0DOY2	Immunoglobulin lambda constant 2 OS=Homo sapiens OX=9606 GN=IGLC2 PE=1 SV=1	0	Pf07654		ENSG00000211677	IGLC2	A0A075B6K9;A0M8Q4;P0CG05;P0CG06;P0DOY2;P80423
52952600	71562500	45474600	3522520	1495070	1588480	FALSE	Met-loss+Acetyl [N-Term]	7E+18	NaN	NaN	NaN	0	109,506	75	11	237	6	152	17,3	8,41	25028,3	306,15	10	11	P22392	Nucleoside diphosphate kinase B OS=Homo sapiens OX=9606 GN=NME2 PE=1 SV=1	0	Pf00334	4831;654364	ENSG00000243678	NME2	A8MWA3;hsa:4831;hsa:654364;P22392;Q1WM23;Q6LCT6
28851000	12372900	52469200	7738330	9249000	2751820	FALSE		-2,98E+18	NaN	NaN	NaN	0	108,972	42	11	106	11	241	26,4	4,79	13408,5	235	8	11	P28066	Proteasome subunit alpha type-5 OS=Homo sapiens OX=9606 GN=PSMA5 PE=1 SV=3	0	Pf00227, Pf10584	5686	ENSG00000143106	PSMA5	B2R8F6;B4E2V4;hsa:5686;P28066;Q3T1C1;Q6IBF7
6426750	10472100	11323000	1332350	631917	9829	FALSE		-3,73E+18	NaN	NaN	NaN	0	108,853	67	15	78	15	282	31,4	7,02	5212,35	156,03	9	15	P10768	S-formylglutathione hydrolase OS=Homo sapiens OX=9606 GN=ESD PE=1 SV=2	0	Pf00756	2098	ENSG00000139684	ESD	hsa:2098;P10768;Q5TBU8;Q5TBV0;Q5TBV2;Q9BVJ2
2776050	3332960	5640230	4922000	5509260	1399420	FALSE		7,93E+18	NaN	NaN	NaN	0	108,538	31	20	140	20	798	88,4	5,39	13204,8	169,61	16	20	P05556	Integrin beta-1 OS=Homo sapiens OX=9606 GN=ITGB1 PE=1 SV=2	0	Pf00362, Pf07965, Pf07974, Pf08725, Pf17205, Pf18372	3688	ENSG00000150093	ITGB1	A8K6N2;D3DRX9;D3DRY3;D3DRY4;D3DRY5;hsa:3688;P05556;P78466;P78467;Q13089;Q13090;Q13091;Q13212;Q14622;Q14647;Q29RW2;Q7Z3V1;Q8WUM6
7287780	1441350	7583770	8873950	6888520	1024030	FALSE		9,17E+18	NaN	NaN	NaN	0	108,37	74	14	103	14	258	27,5	6,05	8560,95	199,42	10	14	O95336	6-phosphogluconolactonase OS=Homo sapiens OX=9606 GN=PGLS PE=1 SV=2	0	Pf01182	25796	ENSG00000130313	PGLS	hsa:25796;O95336
5268310	10698500	8449800	294942	188087	7068,3	FALSE		-7,22E+18	NaN	NaN	NaN	0	107,876	52	19	95	18	539	57,9	7,83	10457,9	144,48	14	19	P50991	T-complex protein 1 subunit delta OS=Homo sapiens OX=9606 GN=CCT4 PE=1 SV=4	0	Pf00118	10575	ENSG00000115484	CCT4	B2R6I3;B7Z8B1;F5H5W3;hsa:10575;O14870;P50991;Q53QP9;Q96C51
2738820	781938	1011130	8385580	5876640	924863	FALSE	Acetyl [N-Term];Met-loss+Acetyl [N-Term]	-4,11E+18	NaN	NaN	NaN	0	107,85	30	22	143	22	896	98,6	4,64	14505,2	136,35	17	21	P42566	Epidermal growth factor receptor substrate 15 OS=Homo sapiens OX=9606 GN=EPS15 PE=1 SV=2	0		2060	ENSG00000085832	EPS15	B2R8J7;D3DPJ2;hsa:2060;P42566;Q5SRH4
8539980	1721730	8939920	1365390	868428	14416,1	FALSE		-2,77E+18	NaN	NaN	NaN	0	107,713	35	19	107	19	874	97,7	5,47	9784,86	109,12	15	19	Q9Y678	Coatomer subunit gamma-1 OS=Homo sapiens OX=9606 GN=COPG1 PE=1 SV=1	0	Pf01602, Pf08752, Pf16381	22820	ENSG00000181789	COPG1	A8K6M8;B3KMF6;hsa:22820;Q54AC4;Q9Y678
8643280	4928390	9503390	3709600	5166370	270094	FALSE	Acetyl [N-Term];Met-loss+Acetyl [N-Term]	-6,14E+18	NaN	NaN	NaN	0	107,618	27	16	91	16	596	63,9	8,21	8788,53	136,17	10	14	Q96HC4	PDZ and LIM domain protein 5 OS=Homo sapiens OX=9606 GN=PDLIM5 PE=1 SV=5	0	Pf00412, Pf00595, Pf15936	10611	ENSG00000163110	PDLIM5	A8K6F9;D6RB78;E9PBF5;hsa:10611;O60705;Q56VN4;Q5UW38;Q8WVK0;Q96HC4
5529210	529338	4075670	4746730	4119350	NaN	FALSE		3,23E+18	NaN	NaN	NaN	0	107,11	19	17	58	17	1729	181,7	4,86	4894,19	94,3	10	17	Q9C0C2	182 kDa tankyrase-1-binding protein OS=Homo sapiens OX=9606 GN=TNKS1BP1 PE=1 SV=4	0	Pf15327	85456	ENSG00000149115	TNKS1BP1	A7E2F8;hsa:85456;Q6PJ35;Q6ZV74;Q9C0C2
5122590	7892420	8115700	45769,9	28229,8	NaN	FALSE		-3,59E+18	NaN	NaN	NaN	0	107,042	28	19	87	19	940	106,2	9,47	9064,12	115,06	16	19	Q7Z7M9	Polypeptide N-acetylgalactosaminyltransferase 5 OS=Homo sapiens OX=9606 GN=GALNT5 PE=1 SV=1	0	Pf00535, Pf00652	11227	ENSG00000136542	GALNT5	A5PKZ1;hsa:11227;Q7Z7M9;Q9UGK7;Q9UHL6
17039900	1998180	20132800	1853730	1460130	166480	FALSE	Acetyl [N-Term];Met-loss+Acetyl [N-Term]	-2,03E+18	NaN	NaN	NaN	0	106,961	39	15	106	15	493	54,5	6	11604,6	178,73	12	14	P12955	Xaa-Pro dipeptidase OS=Homo sapiens OX=9606 GN=PEPD PE=1 SV=3	0	Pf00557, Pf05195	5184	ENSG00000124299	PEPD	A8K3Z1;A8K416;A8K696;A8MX47;B4DDB7;B4DGJ1;E9PCE8;hsa:5184;P12955;Q8TBN9;Q9BT75
6837490	1826570	5626700	12975800	9435880	900403	FALSE		3,2E+18	NaN	NaN	NaN	0	106,686	68	17	163	16	349	39,5	6,84	14933,6	216,67	12	17	Q6IBS0	Twinfilin-2 OS=Homo sapiens OX=9606 GN=TWF2 PE=1 SV=2	0	Pf00241	11344	ENSG00000247596	TWF2	hsa:11344;Q6IBS0;Q9Y3F5
3333300	191429	18135900	227781	123207	NaN	FALSE		-9,01E+18	NaN	NaN	NaN	0	106,378	9	21	234	5	2542	271,4	5,57	25405,1	339,7	17	21	Q9Y4G6	Talin-2 OS=Homo sapiens OX=9606 GN=TLN2 PE=1 SV=4	0	Pf00373, Pf01608, Pf08913, Pf09141, Pf16511	83660	ENSG00000171914	TLN2	A6NLB8;hsa:83660;Q9Y4G6
844090	436880	749918	9018760	15230300	244913	FALSE		-6,63E+17	NaN	NaN	NaN	0	105,758	32	18	110	18	752	83,2	7,42	12803	150,11	16	18	P06681	Complement C2 OS=Homo sapiens OX=9606 GN=C2 PE=1 SV=2	0	Pf00084, Pf00089, Pf00092	717	ENSG00000166278;ENSG00000204364;ENSG00000206372;ENSG00000226560;ENSG00000231543;ENSG00000235017;ENSG00000235696	C2	B4DPF3;B4DV20;E9PFN7;hsa:717;O19694;P06681;Q13904
8730480	12685700	20260600	1636580	600329	122289	FALSE		5,55E+18	NaN	NaN	NaN	0	105,383	59	17	57	17	510	54,6	8,76	3327,82	102,58	7	17	P07954	Fumarate hydratase, mitochondrial OS=Homo sapiens OX=9606 GN=FH PE=1 SV=3	0	Pf00206, Pf10415	2271	ENSG00000091483	FH	B1ANK7;hsa:2271;P07954
8000940	1649960	7821220	1315850	503488	412955	FALSE		2,4E+18	NaN	NaN	NaN	0	105,36	45	16	86	16	529	56,5	5,4	8768,54	116,52	12	16	P06576	ATP synthase subunit beta, mitochondrial OS=Homo sapiens OX=9606 GN=ATP5F1B PE=1 SV=3	0	Pf00006, Pf02874	506	ENSG00000110955	ATP5F1B	A8K4X0;hsa:506;P06576;Q14283
3921840	1056990	3849970	14116900	8145210	3228170	FALSE	Acetyl [N-Term]	4,37E+18	NaN	NaN	NaN	0	105,3	53	20	143	20	491	55,5	7,15	11908,6	169,43	17	20	P43490	Nicotinamide phosphoribosyltransferase OS=Homo sapiens OX=9606 GN=NAMPT PE=1 SV=1	0	Pf04095, Pf18127	10135	ENSG00000105835	NAMPT	A4D0Q9;A4D0R0;hsa:10135;P43490;Q3KQV0;Q8WW95
6645930	4231580	9557710	848427	691072	1393,51	FALSE	Met-loss+Acetyl [N-Term]	-5,38E+17	NaN	NaN	NaN	0	104,591	42	15	70	15	589	65,3	5,11	9425,29	106,26	11	15	P30153	Serine/threonine-protein phosphatase 2A 65 kDa regulatory subunit A alpha isoform OS=Homo sapiens OX=9606 GN=PPP2R1A PE=1 SV=4	0	Pf02985	5518	ENSG00000105568	PPP2R1A	hsa:5518;P30153;Q13773;Q6ICQ3;Q96DH3
6906360	10299200	10369600	681358	161097	85142,1	FALSE		4,47E+18	NaN	NaN	NaN	0	104,347	45	20	100	20	432	47,7	6,34	9619,26	121,43	17	20	P23526	Adenosylhomocysteinase OS=Homo sapiens OX=9606 GN=AHCY PE=1 SV=4	0	Pf00670, Pf05221	191	ENSG00000101444	AHCY	A8K307;B3KUN3;E1P5P2;F5H737;hsa:191;P23526;Q96A36
314063	23668,6	38675,1	132229000	96284100	13716,7	FALSE		5,11E+18	NaN	NaN	NaN	0	104,331	42	8	142	8	267	28,5	9,35	12824	189,74	6	8	P08246	Neutrophil elastase OS=Homo sapiens OX=9606 GN=ELANE PE=1 SV=1	0	Pf00089	1991	ENSG00000197561;ENSG00000277571	ELANE	hsa:1991;P08246;P09649;Q6B0D9;Q6LDP5
4103770	3282060	6926600	NaN	NaN	NaN	FALSE		-8,59E+18	NaN	NaN	NaN	0	104,305	25	12	65	12	1036	113,7	5,21	7172,15	121,81	6	12	Q9NZV1	Cysteine-rich motor neuron 1 protein OS=Homo sapiens OX=9606 GN=CRIM1 PE=1 SV=1	0	Pf00093, Pf00219, Pf02822, Pf19442	51232	ENSG00000150938	CRIM1	hsa:51232;Q2M2G4;Q59GH0;Q7LCQ5;Q9H318;Q9NZV1
5143810	5911160	7168560	1088920	766586	64450	FALSE	Met-loss+Acetyl [N-Term]	-5,27E+18	NaN	NaN	NaN	0	103,961	81	18	112	17	289	32,6	5,86	13766	166,89	12	18	Q15181	Inorganic pyrophosphatase OS=Homo sapiens OX=9606 GN=PPA1 PE=1 SV=2	1	Pf00719	5464	ENSG00000180817	PPA1	hsa:5464;Q15181;Q2M348;Q5SQT7;Q6P7P4;Q9UQJ5;Q9Y5B1
13716900	22602100	20317600	6609210	3571670	2693570	FALSE		5,17E+17	NaN	NaN	NaN	0	103,928	69	15	139	15	246	27,4	6,76	14472	178,12	11	15	P60900	Proteasome subunit alpha type-6 OS=Homo sapiens OX=9606 GN=PSMA6 PE=1 SV=1	0	Pf00227, Pf10584	5687	ENSG00000100902	PSMA6	B2R7J9;B4DQR4;B4DXJ9;hsa:5687;P34062;P60900;Q6IB60
18387500	36579800	25558500	18789100	20313800	7399660	FALSE		-3,81E+18	NaN	NaN	NaN	0	103,77	69	14	160	14	193	20,6	8,57	17394,2	211,59	12	14	P21291	Cysteine and glycine-rich protein 1 OS=Homo sapiens OX=9606 GN=CSRP1 PE=1 SV=3	0	Pf00412	1465	ENSG00000159176	CSRP1	A8K268;hsa:1465;P21291;Q5U0J2
5153010	1009220	4677220	197488	140654	74482,4	FALSE	Acetyl [N-Term];Met-loss+Acetyl [N-Term]	7,45E+18	NaN	NaN	NaN	0	103,549	11	20	85	20	2363	267,1	5,02	8941,9	74,32	16	18	P12270	Nucleoprotein TPR OS=Homo sapiens OX=9606 GN=TPR PE=1 SV=3	0	Pf07926	7175	ENSG00000047410	TPR	hsa:7175;P12270;Q15624;Q15655;Q5SWY0;Q99968
2289890	NaN	5790850	150099	NaN	NaN	FALSE		5,81E+18	NaN	NaN	NaN	0	103,506	28	15	118	1	641	70,3	6,02	15256,5	178,01	11	15	P34931	Heat shock 70 kDa protein 1-like OS=Homo sapiens OX=9606 GN=HSPA1L PE=1 SV=2	0	Pf00012	3305	ENSG00000204390;ENSG00000206383;ENSG00000234258;ENSG00000236251	HSPA1L	A6NNB0;B0UXW8;hsa:3305;O75634;P34931;Q2HXR3;Q8NE72;Q96QC9;Q9UQM1
40571300	283539	56405500	784255	286844	41513,7	FALSE		-4,77E+18	NaN	NaN	NaN	0	103,301	46	13	106	13	381	41,9	5,01	10384,7	158,54	10	13	P26022	Pentraxin-related protein PTX3 OS=Homo sapiens OX=9606 GN=PTX3 PE=1 SV=3	0	Pf00354	5806	ENSG00000163661	PTX3	B2R6T6;hsa:5806;P26022;Q38M82
3168910	59735,3	2226090	22249600	15057200	13278,6	FALSE		3E+18	NaN	NaN	NaN	0	103,236	30	11	127	3	512	56,2	8,02	13089,7	191,8	9	11	P0DOX3	Immunoglobulin delta heavy chain OS=Homo sapiens OX=9606 PE=1 SV=1	8	Pf00047, Pf07654, Pf07686
3784420	8622550	6970260	3082100	5090880	18366,3	FALSE		2,12E+18	NaN	NaN	NaN	0	103,082	47	20	78	20	561	64,3	6,86	7990,44	85,08	16	20	P08243	Asparagine synthetase [glutamine-hydrolyzing] OS=Homo sapiens OX=9606 GN=ASNS PE=1 SV=4	0	Pf00733, Pf13537	440	ENSG00000070669	ASNS	A4D1I8;B4DXZ1;B7ZAA9;D6W5R3;E9PCI3;E9PCX6;hsa:440;P08184;P08243;Q15666;Q549T9;Q96HD0
3670680	2810590	7925420	339276	71281,2	34734,6	FALSE	Acetyl [N-Term]	4,8E+18	NaN	NaN	NaN	0	102,977	21	18	63	18	1262	144,4	6,15	7117,37	71,98	16	18	P41252	Isoleucine--tRNA ligase, cytoplasmic OS=Homo sapiens OX=9606 GN=IARS1 PE=1 SV=2	0	Pf00133, Pf08264, Pf19302	3376	ENSG00000196305	IARS1	A8KAE9;hsa:3376;P41252;Q5TCD0;Q7Z3T4;Q9H588
1261550	487685	921924	9778100	14260300	2008230	FALSE		-8,61E+18	NaN	NaN	NaN	0	102,972	29	15	114	14	699	79,2	5,49	12323,4	151,58	13	15	P48740	Mannan-binding lectin serine protease 1 OS=Homo sapiens OX=9606 GN=MASP1 PE=1 SV=3	0	Pf00084, Pf00089, Pf00431	5648	ENSG00000127241	MASP1	A8K542;A8K6M1;B4E2L7;hsa:5648;O95570;P48740;Q68D21;Q8IUV8;Q96RS4;Q9UF09
6298370	8190820	10826400	499927	779679	115325	FALSE		3,27E+18	NaN	NaN	NaN	0	102,831	45	19	88	19	531	58	6,68	6327,73	154,39	16	19	P40227	T-complex protein 1 subunit zeta OS=Homo sapiens OX=9606 GN=CCT6A PE=1 SV=3	0	Pf00118	908	ENSG00000146731	CCT6A	A6NCD2;hsa:908;P40227;Q3KP28;Q75LP4;Q96S46
11628400	4528130	10316100	3919050	2581060	12413,2	FALSE	Acetyl [N-Term];Met-loss+Acetyl [N-Term]	3,56E+18	NaN	NaN	NaN	0	102,132	69	15	98	15	277	30,4	8,32	12323	122,93	11	14	P16152	Carbonyl reductase [NADPH] 1 OS=Homo sapiens OX=9606 GN=CBR1 PE=1 SV=3	0	Pf00106	873	ENSG00000159228	CBR1	B2RBZ7;B4DFK7;hsa:873;P16152;Q3LHW8
17805300	14831300	23184700	4290670	2820450	2050870	FALSE	Met-loss+Acetyl [N-Term]	7,69E+18	NaN	NaN	NaN	0	102,039	58	13	117	13	248	27,9	8,46	14321,2	193,15	10	13	O14818	Proteasome subunit alpha type-7 OS=Homo sapiens OX=9606 GN=PSMA7 PE=1 SV=1	0	Pf00227, Pf10584	5688	ENSG00000101182	PSMA7	B2R515;hsa:5688;O14818;Q5JXJ2;Q9BR53;Q9H4K5;Q9UEU8
7269420	3288810	11830800	244327	348835	257966	FALSE		6,97E+18	NaN	NaN	NaN	0	101,95	39	18	63	18	586	65,4	8,97	9231,3	83,74	15	18	Q9UHD8	Septin-9 OS=Homo sapiens OX=9606 GN=SEPTIN9 PE=1 SV=2	0	Pf00735	10801	ENSG00000184640	SEPTIN9	A8K2V3;B3KPM0;B4DTL9;B4E0N2;B4E274;B7Z654;hsa:10801;Q96QF3;Q96QF4;Q96QF5;Q9HA04;Q9UG40;Q9UHD8;Q9Y5W4
9865070	1897690	8805070	2234610	1126160	438071	FALSE	Met-loss [N-Term]	-2,85E+18	NaN	NaN	NaN	0	101,719	57	12	120	12	308	34,5	5,12	11428,4	176	6	12	O14579	Coatomer subunit epsilon OS=Homo sapiens OX=9606 GN=COPE PE=1 SV=3	0	Pf04733	11316	ENSG00000105669	COPE	A6NE29;A6NKA3;hsa:11316;O14579;O76097;Q6IBB8;Q9UGP6
7289750	3022480	11882600	8760170	7357720	2772600	FALSE	Met-loss [N-Term]	-8,62E+18	NaN	NaN	NaN	0	101,587	38	18	83	18	494	56	5,3	8485,6	106,46	12	16	P54578	Ubiquitin carboxyl-terminal hydrolase 14 OS=Homo sapiens OX=9606 GN=USP14 PE=1 SV=3	0	Pf00443	9097	ENSG00000101557	USP14	B7Z4N8;hsa:9097;J3QRZ5;P54578;Q53XY5
41614900	26277600	93840200	NaN	63372,1	86296,9	FALSE		-1,31E+18	NaN	NaN	NaN	0	101,504	57	12	148	12	243	26,2	7,99	13748,1	152,58	9	12	Q96CG8	Collagen triple helix repeat-containing protein 1 OS=Homo sapiens OX=9606 GN=CTHRC1 PE=1 SV=1	0		115908	ENSG00000164932	CTHRC1	G3V141;hsa:115908;Q6UW91;Q8IX63;Q96CG8
16989700	3485,95	26696600	534791	412927	NaN	FALSE		-6,42E+18	NaN	NaN	NaN	0	101,144	41	11	74	11	443	49,4	4,94	7658,14	147,8	7	11	O95967	EGF-containing fibulin-like extracellular matrix protein 2 OS=Homo sapiens OX=9606 GN=EFEMP2 PE=1 SV=3	0	Pf07645, Pf12662	30008	ENSG00000172638	EFEMP2	A8K7R4;B3KM31;B3KQT1;hsa:30008;O75967;O95967
10393200	28057300	12854000	486063	537069	355590	FALSE		-4,31E+18	NaN	NaN	NaN	0	101,086	60	16	106	16	374	39,7	7,49	13155,1	142,41	12	16	P11766	Alcohol dehydrogenase class-3 OS=Homo sapiens OX=9606 GN=ADH5 PE=1 SV=4	0	Pf00107, Pf08240	128	ENSG00000197894	ADH5	hsa:128;P11766;Q6FHR2
5966480	2549360	7829690	1199770	1755000	51778,6	FALSE		3,43E+18	NaN	NaN	NaN	0	101,02	41	19	88	19	738	84,7	6,05	7861,87	113,47	13	19	O60568	Multifunctional procollagen lysine hydroxylase and glycosyltransferase LH3 OS=Homo sapiens OX=9606 GN=PLOD3 PE=1 SV=1	0	Pf03171	8985	ENSG00000106397	PLOD3	B2R6W6;hsa:8985;O60568;Q540C3
4750780	3349210	4917540	88514	294883	54571,3	FALSE	Met-loss+Acetyl [N-Term]	-1,14E+18	NaN	NaN	NaN	0	100,795	38	13	57	13	702	80,4	6,32	3988,63	88,97	6	13	Q04446	1,4-alpha-glucan-branching enzyme OS=Homo sapiens OX=9606 GN=GBE1 PE=1 SV=3	0	Pf00128, Pf02806, Pf02922	2632	ENSG00000114480	GBE1	B3KWV3;hsa:2632;Q04446;Q96EN0
8009870	3563410	13653700	544741	453973	190229	FALSE	Acetyl [N-Term]	-8,01E+18	NaN	NaN	NaN	0	100,391	46	17	80	17	543	59,3	7,65	6231,5	114,56	9	17	Q99832	T-complex protein 1 subunit eta OS=Homo sapiens OX=9606 GN=CCT7 PE=1 SV=2	0	Pf00118	10574	ENSG00000135624	CCT7	A8K7E6;A8MWI8;B7WNW9;B7Z4T9;B7Z4Z7;hsa:10574;O14871;Q6FI26;Q99832
9196470	15315100	11865600	51788,5	58096,8	20144,3	FALSE		1,32E+18	NaN	NaN	NaN	0	100,329	48	12	61	12	398	43,9	8,65	6789,89	95,84	8	12	P15291	Beta-1,4-galactosyltransferase 1 OS=Homo sapiens OX=9606 GN=B4GALT1 PE=1 SV=5	0	Pf02709, Pf13733	2683	ENSG00000086062	B4GALT1	B2R710;D3DRL2;hsa:2683;P15291;Q12909;Q12910;Q12911;Q14456;Q14509;Q14523
1820050	626525	1565110	7585560	5732600	376145	FALSE	Met-loss+Acetyl [N-Term]	-6,53E+18	NaN	NaN	NaN	0	100,256	28	21	116	21	864	94,2	5,11	10280,6	106,53	15	21	Q9UBC2	Epidermal growth factor receptor substrate 15-like 1 OS=Homo sapiens OX=9606 GN=EPS15L1 PE=1 SV=1	0	Pf12763	58513	ENSG00000127527	EPS15L1	A2RRF3;A5PL29;B4DKA3;hsa:58513;Q9UBC2
15661200	1899830	1436260	74436,9	57581	NaN	FALSE		2,91E+18	NaN	NaN	NaN	0	99,995	49	16	72	16	298	33,9	5,63	7017,06	93,57	13	16	P20774	Mimecan OS=Homo sapiens OX=9606 GN=OGN PE=1 SV=1	0	Pf13855	4969	ENSG00000106809	OGN	hsa:4969;P20774;Q6FIB0;Q9UF90;Q9UNK5
2795420	2671940	2932390	5620630	8857990	572730	FALSE		-8,44E+18	NaN	NaN	NaN	0	99,869	52	15	84	15	425	47,1	5,21	9265,84	131,74	11	15	O95810	Caveolae-associated protein 2 OS=Homo sapiens OX=9606 GN=CAVIN2 PE=1 SV=3	0	Pf15237	8436	ENSG00000168497	CAVIN2	hsa:8436;O95810
2657730	629086	2399520	8899800	5021410	846200	FALSE		2,53E+18	NaN	NaN	NaN	0	99,702	52	12	107	12	324	36,7	6,06	13358,3	151,25	10	12	Q9NUQ9	CYFIP-related Rac1 interactor B OS=Homo sapiens OX=9606 GN=CYRIB PE=1 SV=1	0	Pf07159	51571	ENSG00000153310	CYRIB	hsa:51571;Q96AZ5;Q9NUQ9;Q9NW21;Q9NZE7
43033300	10976700	49905500	70747800	70233600	15815900	FALSE		6,46E+18	NaN	NaN	NaN	0	99,694	78	15	230	15	142	15,9	5,67	20341,3	317,1	12	15	Q14019	Coactosin-like protein OS=Homo sapiens OX=9606 GN=COTL1 PE=1 SV=3	0	Pf00241	23406	ENSG00000103187	COTL1	B2RDU3;D3DUL9;hsa:23406;Q14019;Q86XM5
1676750	3810850	2243020	1386040	1569430	33400,2	FALSE		-8,53E+18	NaN	NaN	NaN	0	98,603	61	18	91	18	401	44,2	5,21	8773,67	122,82	12	18	Q13561	Dynactin subunit 2 OS=Homo sapiens OX=9606 GN=DCTN2 PE=1 SV=4	0	Pf04912	10540	ENSG00000175203	DCTN2	B2RBK5;hsa:10540;Q13561;Q86YN2;Q9BW17
6675760	13021600	20123000	924428	5541330	143738	FALSE	Acetyl [N-Term]	4,75E+18	NaN	NaN	NaN	0	98,472	48	11	84	11	294	32,6	4,78	8651,69	141,91	7	11	P06748	Nucleophosmin OS=Homo sapiens OX=9606 GN=NPM1 PE=1 SV=2	0	Pf03066, Pf16276	4869	ENSG00000181163	NPM1	A8K3N7;B5BU00;D3DQL6;hsa:4869;P06748;P08693;Q12826;Q13440;Q13441;Q14115;Q5EU94;Q5EU95;Q5EU96;Q5EU97;Q5EU98;Q5EU99;Q6V962;Q8WTW5;Q96AT6;Q96DC4;Q96EA5;Q9BYG9;Q9UDJ7
2978670	10703200	6479800	204432	72178	168538	FALSE		-6,54E+18	NaN	NaN	NaN	0	98,427	45	13	55	13	419	46,9	7,52	3365,83	70,05	6	13	P49767	Vascular endothelial growth factor C OS=Homo sapiens OX=9606 GN=VEGFC PE=1 SV=1	0	Pf00341, Pf03128	7424	ENSG00000150630	VEGFC	B2R9Q8;hsa:7424;P49767
4009540	3693740	3097970	NaN	17816,3	NaN	FALSE	Acetyl [N-Term];Met-loss+Acetyl [N-Term]	3,3E+18	NaN	NaN	NaN	0	97,607	78	15	127	10	166	18,7	7,88	14199,1	170,33	14	14	Q9Y281	Cofilin-2 OS=Homo sapiens OX=9606 GN=CFL2 PE=1 SV=1	0	Pf00241	1073	ENSG00000165410	CFL2	G3V5P4;hsa:1073;Q9Y281
3036220	6273500	5089300	97202	62670,9	NaN	FALSE		-3,27E+17	NaN	NaN	NaN	0	97,543	49	12	41	12	397	41,3	6,92	3159,26	99,11	7	12	Q9BWD1	Acetyl-CoA acetyltransferase, cytosolic OS=Homo sapiens OX=9606 GN=ACAT2 PE=1 SV=2	0	Pf00108, Pf02803	39	ENSG00000120437	ACAT2	B7Z233;E1P5B1;hsa:39;Q16146;Q5TCL7;Q8TDM4;Q9BWD1
19940300	2789040	45819800	75513,1	67545,8	NaN	FALSE		1,18E+18	NaN	NaN	NaN	0	97,536	52	11	67	11	428	46	5,15	5868,7	173,98	6	11	O14498	Immunoglobulin superfamily containing leucine-rich repeat protein OS=Homo sapiens OX=9606 GN=ISLR PE=2 SV=1	0	Pf07679, Pf13855	3671	ENSG00000129009;ENSG00000288508	ISLR	hsa:3671;O14498
1042710	1430080	2917430	NaN	NaN	6265,64	FALSE		-1,44E+18	NaN	NaN	NaN	0	97,355	53	15	90	8	446	49,8	4,88	10763,8	120,94	10	15	Q9BUF5	Tubulin beta-6 chain OS=Homo sapiens OX=9606 GN=TUBB6 PE=1 SV=1	0	Pf00091, Pf03953	84617	ENSG00000176014	TUBB6	B3KM76;hsa:84617;Q9BUF5;Q9HA42
5170930	435674	4582650	NaN	NaN	9830,87	FALSE		-6,59E+18	NaN	NaN	NaN	0	97,275	14	12	50	12	1745	172	6,87	5412,37	126,45	5	12	P25940	Collagen alpha-3(V) chain OS=Homo sapiens OX=9606 GN=COL5A3 PE=1 SV=3	0	Pf01391, Pf01410	50509	ENSG00000080573	COL5A3	hsa:50509;P25940;Q9NZQ6
9400720	5379620	10393500	489453	227193	157677	FALSE		-3,78E+18	NaN	NaN	NaN	0	96,793	35	14	84	14	558	61,4	7,8	9736,45	124,94	12	14	P00367	Glutamate dehydrogenase 1, mitochondrial OS=Homo sapiens OX=9606 GN=GLUD1 PE=1 SV=2	0	Pf00208, Pf02812	2746	ENSG00000148672	GLUD1	B3KV55;B4DGN5;hsa:2746;P00367;Q5TBU3
3228840	3004580	3039620	1635720	2529830	1061230	FALSE		-5,49E+18	NaN	NaN	NaN	0	96,764	34	13	139	9	451	50,3	5,17	18082	209,13	11	13	Q9H4B7	Tubulin beta-1 chain OS=Homo sapiens OX=9606 GN=TUBB1 PE=1 SV=1	2	Pf00091, Pf03953	81027	ENSG00000101162	TUBB1	hsa:81027;Q9H4B7
484718	671,897	462517	5246140	5237900	201049	FALSE		-4,69E+18	NaN	NaN	NaN	0	96,747	40	20	110	20	711	80,3	7,68	7301,19	79,11	15	20	P26927	Hepatocyte growth factor-like protein OS=Homo sapiens OX=9606 GN=MST1 PE=1 SV=2	0	Pf00024, Pf00051, Pf00089	4485		MST1	A6NLA3;A8MSX3;hsa:4485;P26927;Q13350;Q14870;Q6GTN4
2374910	878730	2621440	12993400	13458500	86196,7	FALSE		2,83E+18	NaN	NaN	NaN	0	96,326	30	12	103	12	615	67,7	7,74	12715,3	153,97	10	12	P00748	Coagulation factor XII OS=Homo sapiens OX=9606 GN=F12 PE=1 SV=3	0	Pf00008, Pf00039, Pf00040, Pf00051, Pf00089	2161	ENSG00000131187	F12	hsa:2161;P00748;P78339
876528	1031240	986062	NaN	44657,7	603,104	TRUE		-3,07E+18	NaN	NaN	NaN	0	96,275	16	21	291	11	1662	187,2	6,84	27318,2	310,29	18	21	Q2UVX4	SWISS-PROT:Q2UVX4 (Bos taurus) Complement C3 precursor	0
31516300	NaN	62590200	454364	646031	30303,7	FALSE		-4,86E+17	NaN	NaN	NaN	0	96,141	24	9	94	9	673	71,7	7,39	10954,8	177,79	7	9	Q6EMK4	Vasorin OS=Homo sapiens OX=9606 GN=VASN PE=1 SV=1	0	Pf00008, Pf13855	114990	ENSG00000168140;ENSG00000274334	VASN	hsa:114990;Q6EMK4;Q6UXL4;Q6UXL5;Q96CX1
10080500	5195400	10631700	100330	162735	13069,9	FALSE		3,26E+17	NaN	NaN	NaN	0	96,11	26	10	48	8	526	53,4	9,36	4500,88	114,08	6	10	P35637	RNA-binding protein FUS OS=Homo sapiens OX=9606 GN=FUS PE=1 SV=1	2	Pf00076, Pf00641	2521	ENSG00000089280	FUS	hsa:2521;P35637;Q9H4A8
5941490	5199980	7383220	150936	51091,7	43210,5	FALSE		1,34E+18	NaN	NaN	NaN	0	96,026	59	14	68	14	393	44,9	8,63	7292,48	112,87	8	14	Q9BWS9	Chitinase domain-containing protein 1 OS=Homo sapiens OX=9606 GN=CHID1 PE=1 SV=1	0	Pf00704	66005	ENSG00000177830	CHID1	B3KWB0;hsa:66005;Q8NBM9;Q96CZ3;Q96S93;Q96SK0;Q9BWS9;Q9BY52
2699530	1321310	4184390	824262	511724	NaN	FALSE	Acetyl [N-Term];Met-loss+Acetyl [N-Term]	-9,17E+18	NaN	NaN	NaN	0	94,881	31	17	50	17	858	95,7	5,03	5563,83	58,67	11	15	P45974	Ubiquitin carboxyl-terminal hydrolase 5 OS=Homo sapiens OX=9606 GN=USP5 PE=1 SV=2	0	Pf00443, Pf00627, Pf02148, Pf17807	8078	ENSG00000111667	USP5	D3DUS7;D3DUS8;hsa:8078;P45974;Q96J22
5391850	2607380	7318190	113043	55565,9	19919,1	FALSE	Met-loss+Acetyl [N-Term]	-4,69E+17	NaN	NaN	NaN	0	94,739	26	16	67	16	953	107,1	6,05	6199,6	84,78	12	16	P53618	Coatomer subunit beta OS=Homo sapiens OX=9606 GN=COPB1 PE=1 SV=3	0	Pf01602, Pf07718, Pf14806	1315	ENSG00000129083	COPB1	D3DQX0;hsa:1315;P53618;Q6GTT7;Q9NTK2;Q9UNW7
2247230	3386320	2888720	149490	113736	42279,2	FALSE		4,94E+18	NaN	NaN	NaN	0	94,718	34	17	75	17	760	87,7	6,65	8100,36	88,53	14	17	Q12884	Prolyl endopeptidase FAP OS=Homo sapiens OX=9606 GN=FAP PE=1 SV=5	0	Pf00326, Pf00930	2191	ENSG00000078098	FAP	hsa:2191;O00199;Q12884;Q53TP5;Q86Z29;Q99998;Q9UID4
4318440	1323630	5511730	206513	118437	NaN	FALSE	Acetyl [N-Term]	3,39E+18	NaN	NaN	NaN	0	94,464	27	13	64	13	814	92,4	5	6950,21	107,97	10	13	P55884	Eukaryotic translation initiation factor 3 subunit B OS=Homo sapiens OX=9606 GN=EIF3B PE=1 SV=3	0	Pf00076, Pf08662	8662	ENSG00000106263	EIF3B	A4D208;hsa:8662;P55884;Q2NL77;Q9UMF9
96089200	56103100	96124300	223086000	323910000	54014600	FALSE		-8,42E+18	NaN	NaN	NaN	0	94,438	46	11	355	8	201	23,5	5,11	37373,2	407,78	10	11	P02763	Alpha-1-acid glycoprotein 1 OS=Homo sapiens OX=9606 GN=ORM1 PE=1 SV=2	3	Pf00061	5004	ENSG00000229314	ORM1	B7ZKQ5;hsa:5004;P02763;Q5T539;Q5U067;Q8TC16
9310900	1602180	6374430	3936610	3524190	237014	FALSE		3,53E+18	NaN	NaN	NaN	0	94,359	41	13	95	13	557	59,6	9,16	10735,8	149,83	9	13	P26599	Polypyrimidine tract-binding protein 1 OS=Homo sapiens OX=9606 GN=PTBP1 PE=1 SV=2	0	Pf00076, Pf11835, Pf13893	749887	ENSPPYG00000009289;ENSPTRG00000010165	PTBP1	A0A2J8IKN7;A0A2J8RA58;A0A6D2Y121;H2NWR1;H2R1D9;ptr:749887
495650000	425696000	474352000	10460300	9984060	436635	FALSE	Acetyl [N-Term];Met-loss [N-Term];Met-loss+Acetyl [N-Term]	4,2E+18	NaN	NaN	NaN	0	94,089	84	4	309	3	44	5	5,36	39969,4	326,35	4	3	P63313	Thymosin beta-10 OS=Homo sapiens OX=9606 GN=TMSB10 PE=1 SV=2	0	Pf01290	9168	ENSG00000034510	TMSB10	hsa:9168;P13472;P63313;Q596K9
688004	19005,8	1247850	3470890	4520660	168467	FALSE		5,84E+18	NaN	NaN	NaN	0	94,026	10	21	82	21	5405	571,6	5,34	6970,71	54,81	16	21	Q9Y6R7	IgGFc-binding protein OS=Homo sapiens OX=9606 GN=FCGBP PE=1 SV=3	0	Pf00094, Pf01826, Pf08742, Pf12714, Pf17517	8857	ENSG00000281123	FCGBP	hsa:8857;O95784;Q9Y6R7
3773450	1063520	3405000	147863	115374	5389,95	FALSE		6,21E+18	NaN	NaN	NaN	0	94,02	11	18	67	18	2115	238,1	5,78	6399,75	66,51	12	18	Q14980	Nuclear mitotic apparatus protein 1 OS=Homo sapiens OX=9606 GN=NUMA1 PE=1 SV=2	0		4926	ENSG00000137497	NUMA1	H0YH75;hsa:4926;Q14980;Q14981;Q9BTE9
3105440	3545980	1807650	37332000	40788500	2691150	FALSE		1,6E+18	NaN	NaN	NaN	0	93,99	58	11	140	11	103	11,4	11,36	16029	173,57	9	11	P62805	Histone H4 OS=Homo sapiens OX=9606 GN=H4C16 PE=1 SV=2	0	Pf15511	121504;554313;8294;8359;8360;8361;8362;8363;8364;8365;8366;8367;8368;8370	ENSG00000158406;ENSG00000197061;ENSG00000197238;ENSG00000197837;ENSG00000270276;ENSG00000270882;ENSG00000273542;ENSG00000274618;ENSG00000275126;ENSG00000276180;ENSG00000276966;ENSG00000277157;ENSG00000278637;ENSG00000278705	H4-16;H4C1;H4C11;H4C12;H4C13;H4C14;H4C15;H4C2;H4C3;H4C4;H4C5;H4C6;H4C8;H4C9	A2VCL0;hsa:121504;hsa:554313;hsa:8294;hsa:8359;hsa:8360;hsa:8361;hsa:8362;hsa:8363;hsa:8364;hsa:8365;hsa:8366;hsa:8367;hsa:8368;hsa:8370;P02304;P02305;P62805;Q6DRA9;Q6FGB8;Q6NWP7
15295800	14313500	14011700	17761700	18254200	9844550	FALSE		8,23E+18	NaN	NaN	NaN	0	93,675	64	9	127	9	154	17,9	8,51	4812,13	254,65	4	9	P68036	Ubiquitin-conjugating enzyme E2 L3 OS=Homo sapiens OX=9606 GN=UBE2L3 PE=1 SV=1	0	Pf00179	7332	ENSG00000185651	UBE2L3	B2R4A7;B4DDG1;B4DSZ4;E7EWS7;hsa:7332;P51966;P68036;P70653;Q9HAV1
5291380	4821450	6194850	3445010	3451670	211049	FALSE		-3,61E+18	NaN	NaN	NaN	0	93,468	53	16	73	16	331	38,2	5,38	9357,45	85,69	15	16	Q9Y266	Nuclear migration protein nudC OS=Homo sapiens OX=9606 GN=NUDC PE=1 SV=1	0	Pf04969, Pf14050, Pf16273	10726	ENSG00000090273	NUDC	hsa:10726;Q5QP31;Q5QP35;Q9H0N2;Q9Y266;Q9Y2B6
8081520	2764670	7892100	2726380	2021920	98813,2	FALSE	Acetyl [N-Term];Met-loss+Acetyl [N-Term]	-5,3E+18	NaN	NaN	NaN	0	93,294	62	13	126	10	286	32,9	5,85	16323,2	179,15	10	12	P47755	F-actin-capping protein subunit alpha-2 OS=Homo sapiens OX=9606 GN=CAPZA2 PE=1 SV=3	0	Pf01267	830	ENSG00000198898	CAPZA2	B4DG50;hsa:830;P47755
4762410	4257840	5902870	135325	131812	29926,5	FALSE		1,37E+18	NaN	NaN	NaN	0	93,039	34	20	81	20	748	85,4	6,76	6251,57	96,29	13	20	P49589	Cysteine--tRNA ligase, cytoplasmic OS=Homo sapiens OX=9606 GN=CARS1 PE=1 SV=3	0	Pf01406	833	ENSG00000110619;ENSG00000278191	CARS1	hsa:833;P49589;Q53XI8;Q5HYE4;Q9HD24;Q9HD25
12076800	9532170	18386200	1023840	668989	437631	FALSE		-5,71E+18	NaN	NaN	NaN	0	92,837	58	12	80	12	277	29,9	7,68	6804,03	129,23	10	12	Q99436	Proteasome subunit beta type-7 OS=Homo sapiens OX=9606 GN=PSMB7 PE=1 SV=1	0	Pf00227, Pf12465	5695	ENSG00000136930	PSMB7	B4E0P1;hsa:5695;Q5TBG6;Q96AG8;Q99436;Q9BWA7
5509390	2435990	7879910	3044930	2530110	290101	FALSE	Met-loss [N-Term]	5,73E+18	NaN	NaN	NaN	0	92,706	60	12	89	12	289	32,2	4,96	10915,4	166,87	8	12	O43396	Thioredoxin-like protein 1 OS=Homo sapiens OX=9606 GN=TXNL1 PE=1 SV=3	0	Pf00085, Pf06201	9352	ENSG00000091164	TXNL1	hsa:9352;O43396
NaN	NaN	NaN	66339,4	288586	NaN	FALSE		-3,08E+16	NaN	NaN	NaN	0	92,693	35	9	100	1	384	42,3	8,12	10458,1	168,68	7	9	P01880	Immunoglobulin heavy constant delta OS=Homo sapiens OX=9606 GN=IGHD PE=1 SV=3	0	Pf00047, Pf07654			IGHD	A0A087WUS7;P01880;Q6P4I8;Q8WU38
2793260	1080470	2839310	20128200	21549700	397888	FALSE		-5,14E+18	NaN	NaN	NaN	0	92,531	44	12	158	9	364	41,7	6,73	15897,1	185,52	10	12	Q9HBI1	Beta-parvin OS=Homo sapiens OX=9606 GN=PARVB PE=1 SV=1	3	Pf00307	29780	ENSG00000188677	PARVB	B0QYM8;B0QYN1;B2R9X6;hsa:29780;Q5TGJ5;Q86X93;Q96PN1;Q9HBI1;Q9NSP7;Q9UGT3;Q9Y368;Q9Y3L6;Q9Y3L7
7866810	16773100	9381440	43898500	37294100	229720	FALSE		-5,22E+18	NaN	NaN	NaN	0	91,926	72	20	107	20	261	29	7,31	10088,7	121,82	16	20	P30040	Endoplasmic reticulum resident protein 29 OS=Homo sapiens OX=9606 GN=ERP29 PE=1 SV=4	0	Pf07749, Pf07912	10961	ENSG00000089248	ERP29	C9J183;hsa:10961;P30040;Q3MJC3;Q6FHT4
456002	73022	512289	3488650	6575680	251290	FALSE		5,22E+18	NaN	NaN	NaN	0	91,684	61	18	77	16	376	42,4	5,86	8019,31	86,15	16	18	P50453	Serpin B9 OS=Homo sapiens OX=9606 GN=SERPINB9 PE=1 SV=1	1	Pf00079	5272	ENSG00000170542	SERPINB9	B2RBW3;hsa:5272;P50453;Q5TD03
12870500	13107900	20470400	20586200	29848700	3152370	FALSE	Acetyl [N-Term];Met-loss+Acetyl [N-Term]	7,29E+18	NaN	NaN	NaN	0	91,408	58	15	197	14	309	33,7	7,33	18442	208,89	12	14	Q99439	Calponin-2 OS=Homo sapiens OX=9606 GN=CNN2 PE=1 SV=4	1	Pf00307, Pf00402	1265	ENSG00000064666	CNN2	A5D8U8;A6NFI4;D6W5X9;hsa:1265;Q92578;Q99439
4967350	1592130	7430180	564579	508041	18500,2	FALSE		-8,48E+18	NaN	NaN	NaN	0	90,967	30	14	57	14	732	82,7	5,81	5516,3	110,64	7	14	P13010	X-ray repair cross-complementing protein 5 OS=Homo sapiens OX=9606 GN=XRCC5 PE=1 SV=3	0	Pf02735, Pf03730, Pf03731, Pf08785	7520	ENSG00000079246	XRCC5	A8K3X5;hsa:7520;P13010;Q0Z7V0;Q4VBQ5;Q53HH7;Q7M4N0;Q9UCQ0;Q9UCQ1
30277500	9550890	19569000	8164610	16520200	5274910	FALSE	Acetyl [N-Term]	2,65E+18	NaN	NaN	NaN	0	90,076	86	7	79	7	98	11,1	7,56	4000,02	206,07	3	7	P04080	Cystatin-B OS=Homo sapiens OX=9606 GN=CSTB PE=1 SV=2	0	Pf00031	1476	ENSG00000160213	CSTB	hsa:1476;P04080
511560	96341,3	32132,2	18369500	24321400	20477300	FALSE		-4,08E+18	NaN	NaN	NaN	0	89,995	83	15	94	15	93	10,8	7,03	9111,54	119,42	13	15	P05109	Protein S100-A8 OS=Homo sapiens OX=9606 GN=S100A8 PE=1 SV=1	0	Pf01023	6279	ENSG00000143546	S100A8	A8K5L3;D3DV37;hsa:6279;P05109;Q5SY70;Q9UC84;Q9UC92;Q9UCJ0;Q9UCM6
3078660	946338	2269310	11050200	14947900	328941	FALSE		-5,76E+18	NaN	NaN	NaN	0	89,674	57	14	116	14	303	33,8	6,74	14494,9	155,76	13	14	P46109	Crk-like protein OS=Homo sapiens OX=9606 GN=CRKL PE=1 SV=1	0	Pf00017, Pf00018, Pf07653	1399	ENSG00000099942	CRKL	A8KA44;D3DX35;hsa:1399;P46109
2063530	790268	2289170	19325900	24721400	2556080	FALSE		-2,14E+18	NaN	NaN	NaN	0	89,567	74	12	107	12	201	23	6,07	9592,82	170,31	9	12	P02753	Retinol-binding protein 4 OS=Homo sapiens OX=9606 GN=RBP4 PE=1 SV=3	0	Pf00061	5950	ENSG00000138207	RBP4	D3DR38;hsa:5950;O43478;O43479;P02753;Q5VY24;Q8WWA3;Q9P178
2783160	5056720	3227800	12273000	15644800	3245450	FALSE		-9,97E+17	NaN	NaN	NaN	0	89,482	54	15	141	15	352	39,6	5,19	12973,9	144,88	12	15	Q9NYL9	Tropomodulin-3 OS=Homo sapiens OX=9606 GN=TMOD3 PE=1 SV=1	0	Pf03250	29766	ENSG00000138594	TMOD3	B2R6G7;hsa:29766;Q9NT43;Q9NYL9;Q9NZR0
2492760	6552910	3286310	NaN	NaN	NaN	FALSE		-5,33E+18	NaN	NaN	NaN	0	89,291	44	16	42	16	542	59,8	6,25	3096,77	71,5	9	16	O95394	Phosphoacetylglucosamine mutase OS=Homo sapiens OX=9606 GN=PGM3 PE=1 SV=1	0	Pf00408, Pf02878	5238	ENSG00000013375	PGM3	B2RB65;B4DX94;D6RF12;E1P547;E9PF86;hsa:5238;O95394;Q5JWR4;Q96J46;Q9H8G5;Q9NS94;Q9NTT6;Q9UFV5;Q9UIY2
454619	55116	407935	158130	47191,8	NaN	TRUE		-8,99E+18	NaN	NaN	NaN	0	89,202	27	11	173	3	557	62,8	7,71	20284	265,37	7	11	Q3ZBD7	SWISS-PROT:Q3ZBD7 (Bos taurus) Glucose-6-phosphate isomerase	0
3839490	1126180	4771030	2555140	1813120	33054,8	FALSE		-1,19E+18	NaN	NaN	NaN	0	88,935	58	12	64	12	317	36,9	4,4	5728,83	97,64	6	12	Q14257	Reticulocalbin-2 OS=Homo sapiens OX=9606 GN=RCN2 PE=1 SV=1	0	Pf13202	5955	ENSG00000117906	RCN2	A8MTG6;F8WCY5;hsa:5955;Q14257;Q53XN8
344827	411700	333642	8102560	4007070	565666	FALSE		-7,32E+18	NaN	NaN	NaN	0	88,919	27	14	68	14	595	67,5	7,78	6748,08	77,98	10	14	P29350	Tyrosine-protein phosphatase non-receptor type 6 OS=Homo sapiens OX=9606 GN=PTPN6 PE=1 SV=1	0	Pf00017, Pf00102	5777	ENSG00000111679	PTPN6	A8K306;G3V0F8;hsa:5777;P29350;Q969V8;Q9UK67
5108420	6299740	8847160	248823	88757,5	48900,6	FALSE		7,27E+18	NaN	NaN	NaN	0	88,765	42	18	86	18	408	46,8	7,12	9482,18	82,38	17	18	P05455	Lupus La protein OS=Homo sapiens OX=9606 GN=SSB PE=1 SV=2	0	Pf00076, Pf05383, Pf08777	6741	ENSG00000138385	SSB	hsa:6741;P05455;Q15367;Q53XJ4
13310500	12142900	10736900	4604430	7478770	409550	FALSE		-9,14E+18	NaN	NaN	NaN	0	88,532	81	9	130	9	118	12,9	5,52	15087,1	207,3	6	9	P58546	Myotrophin OS=Homo sapiens OX=9606 GN=MTPN PE=1 SV=2	0	Pf12796	136319	ENSG00000105887	MTPN	hsa:136319;P58546
9883880	3002780	10801900	265477	90224,2	150879	FALSE	Acetyl [N-Term]	6,45E+18	NaN	NaN	NaN	0	88,517	40	9	74	9	332	35,5	7,17	9394,11	101,81	8	9	Q53FA7	Quinone oxidoreductase PIG3 OS=Homo sapiens OX=9606 GN=TP53I3 PE=1 SV=2	0	Pf00107, Pf08240	9540	ENSG00000115129	TP53I3	D6W533;hsa:9540;O14679;O14685;Q38G78;Q53FA7;Q6JLE7;Q9BWB8
5396850	2493350	5518060	NaN	NaN	NaN	FALSE	Met-loss+Acetyl [N-Term]	-8,88E+18	NaN	NaN	NaN	0	88,458	24	20	78	20	1268	141,4	6,87	6658,07	74,22	15	20	Q00341	Vigilin OS=Homo sapiens OX=9606 GN=HDLBP PE=1 SV=2	0	Pf00013	3069	ENSG00000115677	HDLBP	B4DTQ2;E7EM71;hsa:3069;Q00341;Q53QU2;Q9UCY3
7242270	3464460	10163200	2410710	1800180	428615	FALSE		-7,54E+18	NaN	NaN	NaN	0	88,376	42	17	87	17	732	81,2	5,48	6177,99	104,72	10	17	P13798	Acylamino-acid-releasing enzyme OS=Homo sapiens OX=9606 GN=APEH PE=1 SV=4	0	Pf00326, Pf19283	327	ENSG00000164062	APEH	hsa:327;P13798;Q9BQ33;Q9P0Y2
15151800	3915550	23032800	3656400	2452250	524540	FALSE	Acetyl [N-Term]	1,62E+18	NaN	NaN	NaN	0	88,02	47	17	127	17	463	50,9	5,54	9326,4	158,28	12	17	P61978	Heterogeneous nuclear ribonucleoprotein K OS=Homo sapiens OX=9606 GN=HNRNPK PE=1 SV=1	0	Pf00013, Pf08067	3190	ENSG00000165119	HNRNPK	hsa:3190;P61978;Q07244;Q15671;Q59F98;Q5T6W4;Q60577;Q6IBN1;Q922Y7;Q96J62
7989620	5699510	8920380	3565730	3356730	642172	FALSE	Met-loss+Acetyl [N-Term]	7,72E+18	NaN	NaN	NaN	0	87,684	95	8	84	8	127	14,5	5,38	5858,73	149,65	3	8	P61970	Nuclear transport factor 2 OS=Homo sapiens OX=9606 GN=NUTF2 PE=1 SV=1	0	Pf02136	10204	ENSG00000102898	NUTF2	B2R4G7;hsa:10204;P13662;P61970;Q6IB67
3014690	1985920	3930930	291640	233307	73390,2	FALSE		-8,21E+18	NaN	NaN	NaN	0	87,067	23	18	82	13	843	96,6	6,86	8879,25	75,47	17	18	P11216	Glycogen phosphorylase, brain form OS=Homo sapiens OX=9606 GN=PYGB PE=1 SV=5	0	Pf00343	5834	ENSG00000100994	PYGB	hsa:5834;P11216;Q96AK1;Q9NPX8
3033580	3418170	5469650	NaN	NaN	79152,9	FALSE		-7,4E+18	NaN	NaN	NaN	0	86,887	40	17	59	17	534	61	6,01	5286,96	60,44	13	17	P13674	Prolyl 4-hydroxylase subunit alpha-1 OS=Homo sapiens OX=9606 GN=P4HA1 PE=1 SV=2	0	Pf08336, Pf13640	5033	ENSG00000122884	P4HA1	C9JL12;hsa:5033;P13674;Q15082;Q15083;Q5VSQ5
76239,9	97359,9	64938,4	NaN	NaN	NaN	TRUE		6,87E+18	NaN	NaN	NaN	0	86,829	16	12	123	1	625	70,5	6,33	14278	155,01	10	12	P00735	SWISS-PROT:P00735 (Bos taurus) Prothrombin precursor (Fragment)	0	Pf00051, Pf00089, Pf00594, Pf09396	280685		F2	bta:280685;P00735;Q3MHK7
2363050	3151170	2933340	42250,1	11514,6	10947,6	FALSE		6,71E+18	NaN	NaN	NaN	0	86,666	35	15	50	15	780	85,4	7,61	5335,47	73,89	10	15	Q99798	Aconitate hydratase, mitochondrial OS=Homo sapiens OX=9606 GN=ACO2 PE=1 SV=2	0	Pf00330, Pf00694	50	ENSG00000100412	ACO2	hsa:50;O75809;Q5JZ41;Q6FHX0;Q8TAQ6;Q99798
12001200	3728360	12811800	16295800	3985660	9112420	FALSE		-1,02E+18	NaN	NaN	NaN	0	86,65	59	13	133	13	256	27,7	7,78	13124,7	166,62	8	13	P30048	Thioredoxin-dependent peroxide reductase, mitochondrial OS=Homo sapiens OX=9606 GN=PRDX3 PE=1 SV=3	0	Pf00578, Pf10417	10935	ENSG00000165672	PRDX3	B2R7Z0;D3DRC9;E9PH29;hsa:10935;P30048;P35690;Q0D2H1;Q13776;Q5T5V2;Q96HK4
2584740	8423440	4280570	181508	193822	18442,2	FALSE	Met-loss+Acetyl [N-Term]	-4,88E+18	NaN	NaN	NaN	0	86,445	40	11	48	11	414	46,4	4,75	6915,62	84,69	10	11	Q12765	Secernin-1 OS=Homo sapiens OX=9606 GN=SCRN1 PE=1 SV=2	0	Pf03577	9805	ENSG00000136193	SCRN1	A8K0E9;B4DHM0;B4DIP5;C9JPG0;hsa:9805;Q12765;Q25QX7;Q8IWD1
5777680	4020650	1762930	23994900	45786700	3844170	FALSE	Acetyl [N-Term];Met-loss+Acetyl [N-Term]	2E+18	NaN	NaN	NaN	0	86,37	60	13	113	13	218	24,5	5,94	11429,2	154,6	11	12	Q15907	Ras-related protein Rab-11B OS=Homo sapiens OX=9606 GN=RAB11B PE=1 SV=4	0	Pf00071	9230	ENSG00000185236	RAB11B	A5YM50;B2R7I4;B4DMK0;D6W671;hsa:9230;Q15907;Q2YDT2;Q5U0I1;Q6FHR0;Q6FI42;Q8NI07
6363240	2906030	9085710	125617000	184038000	1146900	FALSE		6,72E+18	NaN	NaN	NaN	0	86,145	57	7	99	7	159	18,1	5,24	8515,58	174,32	5	7	P01591	Immunoglobulin J chain OS=Homo sapiens OX=9606 GN=JCHAIN PE=1 SV=4	0	Pf15097	3512	ENSG00000132465	JCHAIN	hsa:3512;P01591
2758900	2862960	3479010	267475	164518	NaN	FALSE		9,04E+18	NaN	NaN	NaN	0	85,947	53	11	44	11	312	35,1	6,13	4045,39	76,07	6	11	O00764	Pyridoxal kinase OS=Homo sapiens OX=9606 GN=PDXK PE=1 SV=1	0	Pf08543	8566	ENSG00000160209	PDXK	hsa:8566;O00764;Q7Z2Y0;Q9BS02
2756530	1611140	1824800	5362020	2378880	1843030	FALSE		-7,41E+18	NaN	NaN	NaN	0	85,661	38	14	79	14	522	56,2	8,5	6023,19	149,45	9	14	P00390	Glutathione reductase, mitochondrial OS=Homo sapiens OX=9606 GN=GSR PE=1 SV=2	0	Pf00070, Pf02852	2936	ENSG00000104687	GSR	C8KIL8;C8KIL9;C8KIM0;D3DSV3;hsa:2936;P00390;Q7Z5C9;Q9NP63
4112820	1936780	5061520	1414300	481927	1691750	FALSE		-5,1E+18	NaN	NaN	NaN	0	85,64	44	14	95	11	364	39,4	6,87	6784,86	141,12	9	14	P09972	Fructose-bisphosphate aldolase C OS=Homo sapiens OX=9606 GN=ALDOC PE=1 SV=2	0	Pf00274	230	ENSG00000109107	ALDOC	B2R5R3;hsa:230;P09972;Q3SYL3;Q6FH94;Q6P0L5
17654800	40465600	49954500	1431370	1942830	334319	FALSE		-5,84E+18	NaN	NaN	NaN	0	85,38	44	15	117	15	291	31,7	8,69	10527,4	156,66	13	15	P17936	Insulin-like growth factor-binding protein 3 OS=Homo sapiens OX=9606 GN=IGFBP3 PE=1 SV=2	0	Pf00086, Pf00219	3486	ENSG00000146674	IGFBP3	A4D2F5;D3DVM0;hsa:3486;P17936;Q2V509;Q6P1M6;Q9UCL4
32208,1	27716,5	79911,6	8595010	4319370	2992940	FALSE	Acetyl [N-Term];Met-loss+Acetyl [N-Term]	-6,84E+18	NaN	NaN	NaN	0	85,195	44	9	53	9	339	37,2	4,74	5395,16	100,86	6	8	P33241	Lymphocyte-specific protein 1 OS=Homo sapiens OX=9606 GN=LSP1 PE=1 SV=1	0	Pf02029	4046	ENSG00000130592;ENSG00000288199	LSP1	B3KPP1;B3KRR6;E9PBV6;E9PFP3;hsa:4046;P33241;Q16096;Q53H48;Q6FHM3;Q9BUY8
6222210	4337790	7229140	6869520	4020460	1212780	FALSE		7,46E+18	NaN	NaN	NaN	0	85,172	43	16	110	14	534	60,6	6,83	11169,9	136,25	9	16	Q9H4M9	EH domain-containing protein 1 OS=Homo sapiens OX=9606 GN=EHD1 PE=1 SV=2	0	Pf00350, Pf12763, Pf16880, Pf18150	10938	ENSG00000110047	EHD1	hsa:10938;O14611;Q2M3Q4;Q9H4M9;Q9UNR3
3443130	3027950	6406340	82859	63620,7	14016,9	FALSE	Acetyl [N-Term];Met-loss+Acetyl [N-Term]	-7,71E+18	NaN	NaN	NaN	0	85,033	51	11	49	11	295	32,8	4,87	5052,3	97,09	8	10	P08865	40S ribosomal protein SA OS=Homo sapiens OX=9606 GN=RPSA PE=1 SV=4	0	Pf00318, Pf16122	3921	ENSG00000168028	RPSA	hsa:3921;P08865;P11085;P12030;Q16471;Q6IPD1;Q6IPD2;Q6NSD1;Q6NXQ8;Q86VC0
2304880	9043640	2276830	810915	963914	358954	FALSE	Met-loss [N-Term]	2,22E+17	NaN	NaN	NaN	0	84,79	84	10	52	10	68	7,4	7,24	7227,22	71,04	8	9	O00244	Copper transport protein ATOX1 OS=Homo sapiens OX=9606 GN=ATOX1 PE=1 SV=1	0	Pf00403	475	ENSG00000177556	ATOX1	A8KAJ8;D3DQI2;hsa:475;O00244;Q2M1R6;Q56AP3
911636	691607	740529	7039240	10710700	1173660	FALSE		-7,49E+18	NaN	NaN	NaN	0	84,72	41	13	68	13	423	48,4	7,71	5798,38	116,53	8	13	Q96IY4	Carboxypeptidase B2 OS=Homo sapiens OX=9606 GN=CPB2 PE=1 SV=2	0	Pf00246, Pf02244	1361	ENSG00000080618	CPB2	A8K464;hsa:1361;Q15114;Q5T9K1;Q5T9K2;Q96IY4;Q9P2Y6
20633700	3226160	29757500	8755980	1236080	174289	FALSE		8,83E+18	NaN	NaN	NaN	0	84,669	40	15	69	15	509	54,1	7,85	6959,15	81,09	13	15	P09622	Dihydrolipoyl dehydrogenase, mitochondrial OS=Homo sapiens OX=9606 GN=DLD PE=1 SV=2	0	Pf02852, Pf07992	1738	ENSG00000091140	DLD	B2R5X0;B4DHG0;B4DT69;hsa:1738;P09622;Q14131;Q14167;Q59EV8;Q8WTS4
7573880	8648900	10705100	21345000	19788900	29253900	FALSE		-6,12E+18	NaN	NaN	NaN	0	84,207	52	10	162	10	182	20,7	8,69	20296,4	251,64	10	10	P55145	Mesencephalic astrocyte-derived neurotrophic factor OS=Homo sapiens OX=9606 GN=MANF PE=1 SV=3	0	Pf10208, Pf20145	7873	ENSG00000145050	MANF	hsa:7873;P55145;Q14CX4;Q86U67;Q96IS4
14814000	39485000	13538500	18417800	9946980	11409200	FALSE		6,8E+18	NaN	NaN	NaN	0	83,985	80	8	188	8	87	10	6,57	24878,6	259,1	8	8	P07108	Acyl-CoA-binding protein OS=Homo sapiens OX=9606 GN=DBI PE=1 SV=2	0	Pf00887	1622	ENSG00000155368	DBI	B8ZWD2;B8ZWD6;B8ZWD7;hsa:1622;P07108;P08869;Q4VWZ6;Q53SQ7;Q6IB48;Q9UCI8
5074310	1630960	5954090	34240,3	5141,7	4159,13	FALSE		-8,72E+18	NaN	NaN	NaN	0	83,822	23	16	75	16	879	100,8	5,52	7242,29	68,24	14	15	O00462	Beta-mannosidase OS=Homo sapiens OX=9606 GN=MANBA PE=1 SV=3	0	Pf02836, Pf17753, Pf17786	4126	ENSG00000109323	MANBA	hsa:4126;O00462;Q96BC3;Q9NYX9
5276210	7368390	5046220	5905620	4076390	822852	FALSE	Met-loss+Acetyl [N-Term]	7,23E+18	NaN	NaN	NaN	0	83,784	70	14	112	14	205	22,9	4,63	12073,6	164,57	10	14	Q9Y5Z4	Heme-binding protein 2 OS=Homo sapiens OX=9606 GN=HEBP2 PE=1 SV=1	0	Pf04832	23593	ENSG00000051620	HEBP2	hsa:23593;Q96P57;Q9Y5Z4
7406840	865132	14421600	4645570	3064530	919016	FALSE		-5,99E+17	NaN	NaN	NaN	0	83,379	27	10	63	10	593	63,5	6,83	4323,98	126,54	6	10	P28799	Progranulin OS=Homo sapiens OX=9606 GN=GRN PE=1 SV=2	0	Pf00396	2896	ENSG00000030582	GRN	D3DX55;hsa:2896;P23781;P23782;P23783;P23784;P28799;Q53HQ8;Q53Y88;Q540U8;Q9BWE7;Q9H8S1;Q9UCH0
3293450	10308500	3532270	25457,1	385032	60136,9	TRUE		-1,74E+17	NaN	NaN	NaN	0	83,298	53	13	77	12	265	30,3	5,97	8876,49	80,92	12	13	P15497	SWISS-PROT:P15497 (Bos taurus) Apolipoprotein A-I precursor	0	Pf01442	281631	ENSBTAG00000002258	APOA1	A5D7M9;bta:281631;P15497;Q3SZD9
4197020	4910800	5909270	5566910	2901930	2609320	FALSE		-4,39E+18	NaN	NaN	NaN	0	82,871	33	13	85	13	410	46,6	7,37	10296,4	114,9	13	13	P43034	Platelet-activating factor acetylhydrolase IB subunit beta OS=Homo sapiens OX=9606 GN=PAFAH1B1 PE=1 SV=2	0	Pf00400, Pf08513	5048	ENSG00000007168	PAFAH1B1	B2R7Q7;hsa:5048;P43034;Q8WZ88;Q8WZ89
2861710	2564350	7318400	131408	105036	88949,3	FALSE		-6,84E+18	NaN	NaN	NaN	0	82,84	39	15	63	15	667	75,5	4,87	5373,74	83,75	8	15	Q13438	Protein OS-9 OS=Homo sapiens OX=9606 GN=OS9 PE=1 SV=1	0	Pf07915	10956	ENSG00000135506	OS9	A6NDD1;A6NFR7;A6NLB2;A8K5Q9;B4DE28;B4DPX1;B4E1I6;E7ENT8;E7EW91;F8VUH2;G3XA88;hsa:10956;O00579;Q13438;Q6IBL2;Q8IZ58;Q9BW99
10557600	18881000	12712700	3949980	2097890	1118200	FALSE	Acetyl [N-Term];Met-loss+Acetyl [N-Term]	-1,99E+17	NaN	NaN	NaN	0	82,717	47	13	109	13	255	28,4	5,33	10651,4	137,06	10	12	P25788	Proteasome subunit alpha type-3 OS=Homo sapiens OX=9606 GN=PSMA3 PE=1 SV=2	0	Pf00227, Pf10584	5684	ENSG00000100567	PSMA3	B2RCK6;hsa:5684;P25788;Q86U83;Q8N1D8;Q9BS70
8442690	3084630	8158220	10314400	7175550	99053,5	FALSE		8,05E+18	NaN	NaN	NaN	0	82,621	54	15	133	15	249	28,7	6,02	14838,8	136,41	13	15	Q06323	Proteasome activator complex subunit 1 OS=Homo sapiens OX=9606 GN=PSME1 PE=1 SV=1	0	Pf02251, Pf02252	5720	ENSG00000092010;ENSG00000284916	PSME1	A6NJG9;H0YNE3;hsa:5720;Q06323;Q6IBM2;Q9UEF4
15051000	3265100	23972500	77312,7	96277,5	68811	FALSE		2,87E+18	NaN	NaN	NaN	0	82,499	36	15	46	15	509	57,4	5,88	4502,29	67,28	12	15	P12081	Histidine--tRNA ligase, cytoplasmic OS=Homo sapiens OX=9606 GN=HARS1 PE=1 SV=2	0	Pf00458, Pf03129, Pf13393	3035	ENSG00000170445	HARS1	B4DHQ1;B4DY73;D6REN6;hsa:3035;J3KNE5;P12081
6599230	1964880	5575220	536223	94209,2	220383	FALSE		4,59E+18	NaN	NaN	NaN	0	82,282	34	11	74	11	474	52,4	5,92	7880,11	105,3	7	11	P48637	Glutathione synthetase OS=Homo sapiens OX=9606 GN=GSS PE=1 SV=1	0	Pf03199, Pf03917	2937	ENSG00000100983	GSS	B2R697;B6F210;E1P5P9;hsa:2937;P48637;Q4TTD9
2119450	178449	1858830	2440790	1836070	175804	FALSE	Acetyl [N-Term]	1,5E+18	NaN	NaN	NaN	0	82,24	43	13	91	13	330	36,3	6,79	11559	107,35	12	13	P13716	Delta-aminolevulinic acid dehydratase OS=Homo sapiens OX=9606 GN=ALAD PE=1 SV=1	0	Pf00490	210	ENSG00000148218	ALAD	A8K375;B2R6F2;hsa:210;P13716;Q16870;Q16871;Q9BVQ9
3969480	5793660	3618050	196000	174890	NaN	FALSE		-1,83E+18	NaN	NaN	NaN	0	82,226	42	12	49	12	395	43,6	6,48	3741,43	73,42	8	12	P31153	S-adenosylmethionine synthase isoform type-2 OS=Homo sapiens OX=9606 GN=MAT2A PE=1 SV=1	0	Pf00438, Pf02772, Pf02773	4144	ENSG00000168906	MAT2A	A8K511;B4DN45;D6W5L1;hsa:4144;P31153;Q53SP5
10982100	1674190	13376000	2271520	24704,4	406334	FALSE		1,45E+18	NaN	NaN	NaN	0	81,974	34	18	61	17	620	69,9	5,59	6059,96	74,91	14	18	Q03252	Lamin-B2 OS=Homo sapiens OX=9606 GN=LMNB2 PE=1 SV=4	0	Pf00038, Pf00932	84823	ENSG00000176619	LMNB2	hsa:84823;O75292;Q03252;Q14734;Q96DF6
6166660	3736840	12947800	75361,6	280928	147284	FALSE		-6,59E+18	NaN	NaN	NaN	0	81,964	30	12	53	12	571	64,7	8,35	6247,81	95,08	8	12	Q10471	Polypeptide N-acetylgalactosaminyltransferase 2 OS=Homo sapiens OX=9606 GN=GALNT2 PE=1 SV=1	0	Pf00535, Pf00652	2590	ENSG00000143641	GALNT2	A8K1Y3;B7Z8V8;C5HU00;hsa:2590;Q10471;Q9NPY4
5615680	3218780	6020360	4823500	4503650	299100	FALSE	Acetyl [N-Term];Met-loss+Acetyl [N-Term]	-3,71E+18	NaN	NaN	NaN	0	81,925	44	20	109	20	515	59,2	6,84	9313,69	107,8	16	19	P11413	Glucose-6-phosphate 1-dehydrogenase OS=Homo sapiens OX=9606 GN=G6PD PE=1 SV=4	0	Pf00479, Pf02781	2539	ENSG00000160211	G6PD	D3DWX9;hsa:2539;P11413;Q16000;Q16765;Q8IU70;Q8IU88;Q8IUA6;Q96PQ2
7630560	4626420	7658220	3852560	6184740	428695	FALSE		8,42E+18	NaN	NaN	NaN	0	81,837	49	12	63	12	457	49,8	8,41	5375,95	140,69	7	12	Q9NR12	PDZ and LIM domain protein 7 OS=Homo sapiens OX=9606 GN=PDLIM7 PE=1 SV=1	0	Pf00412, Pf00595	9260	ENSG00000196923	PDLIM7	hsa:9260;Q14250;Q5XG82;Q6NVZ5;Q96C91;Q9BXB8;Q9BXB9;Q9NR12
4069710	320610	3436390	79645,8	39600	1243,94	FALSE		6,88E+17	NaN	NaN	NaN	0	81,66	25	11	79	9	765	86,1	7,08	10934,4	116,09	7	11	Q15436	Protein transport protein Sec23A OS=Homo sapiens OX=9606 GN=SEC23A PE=1 SV=2	2	Pf00626, Pf04810, Pf04811, Pf04815, Pf08033	10484	ENSG00000100934	SEC23A	B2R5P4;B3KXI2;hsa:10484;Q15436;Q8NE16
2452930	1514490	3515970	123388	67157	27751,6	FALSE		7,94E+18	NaN	NaN	NaN	0	81,647	12	11	48	11	1220	132,9	6,89	6723,63	69,71	10	11	O94979	Protein transport protein Sec31A OS=Homo sapiens OX=9606 GN=SEC31A PE=1 SV=3	0	Pf12931	22872	ENSG00000138674	SEC31A	B4DIW6;B7ZKZ7;B7ZL00;H7C2W3;hsa:22872;O94979;Q17RR5;Q5H9P6;Q5XG74;Q659G7;Q6ZU90;Q7LCX9;Q86TJ0;Q8IZH4;Q9P048;Q9P0A6;Q9UM05;Q9UM06
8584210	3557100	8800970	NaN	165912	NaN	FALSE		2,25E+18	NaN	NaN	NaN	0	81,613	68	5	38	5	146	16,4	4,63	1175,02	140,76	1	5	Q8NI22	Multiple coagulation factor deficiency protein 2 OS=Homo sapiens OX=9606 GN=MCFD2 PE=1 SV=1	0	Pf13499	90411	ENSG00000180398	MCFD2	A8K7W2;D6W5A9;E9PD95;hsa:90411;Q53SS3;Q68D61;Q8N3M5;Q8NI22
10591700	7077100	16481300	3079,63	4311,29	17066,8	FALSE		-1,43E+18	NaN	NaN	NaN	0	81,479	48	16	81	16	477	53,9	6,16	7196,88	96,65	12	16	P08254	Stromelysin-1 OS=Homo sapiens OX=9606 GN=MMP3 PE=1 SV=2	0	Pf00045, Pf00413, Pf01471	4314	ENSG00000149968	MMP3	B2R8B8;hsa:4314;P08254;Q3B7S0;Q6GRF8
7063220	2505490	2685280	44036,7	27353,4	22672,5	FALSE		3,52E+18	NaN	NaN	NaN	0	81,428	60	14	45	8	323	36,8	7,94	4612,81	67,81	7	14	P42330	Aldo-keto reductase family 1 member C3 OS=Homo sapiens OX=9606 GN=AKR1C3 PE=1 SV=4	6	Pf00248	8644	ENSG00000196139	AKR1C3	A8K2V0;B4DL37;hsa:8644;P42330;Q5T2L1;Q96DJ1;Q96KI8;Q99530;Q9UCX1;Q9UII3;Q9UKL9
29030,3	3006,62	103526	12295200	6790780	211905	FALSE		-1,92E+18	NaN	NaN	NaN	0	81,379	36	13	78	13	467	53,4	6,87	8357,77	98,44	12	13	P22894	Neutrophil collagenase OS=Homo sapiens OX=9606 GN=MMP8 PE=1 SV=1	0	Pf00045, Pf00413, Pf01471	4317	ENSG00000118113	MMP8	hsa:4317;P22894;Q45F99
2831340	3101750	8156950	23439,7	12189,6	6158,54	FALSE	Met-loss [N-Term]	1,96E+18	NaN	NaN	NaN	0	81,276	36	15	60	15	548	62,9	6,25	6395,81	86,48	11	15	O43776	Asparagine--tRNA ligase, cytoplasmic OS=Homo sapiens OX=9606 GN=NARS1 PE=1 SV=1	0	Pf00152, Pf01336	4677	ENSG00000134440	NARS1	B4DG16;hsa:4677;O43776;Q53GU6
2186510	1476410	3123400	584982	292285	NaN	FALSE		-8,29E+18	NaN	NaN	NaN	0	81,248	20	16	49	16	1278	141,6	5,81	5113,13	57,51	13	16	Q14203	Dynactin subunit 1 OS=Homo sapiens OX=9606 GN=DCTN1 PE=1 SV=3	0	Pf01302, Pf12455	1639	ENSG00000204843	DCTN1	A8MY36;B4DM45;E9PFS5;E9PGE1;G5E9H4;hsa:1639;O95296;Q14203;Q6IQ37;Q9BRM9;Q9UIU1;Q9UIU2
6844590	9888190	10189300	NaN	NaN	65771,9	FALSE		-8,29E+18	NaN	NaN	NaN	0	81,135	33	6	43	6	263	27,6	6,77	5178,21	111,36	4	6	O95633	Follistatin-related protein 3 OS=Homo sapiens OX=9606 GN=FSTL3 PE=1 SV=1	0	Pf07648, Pf09289	10272	ENSG00000070404	FSTL3	A8K7E3;hsa:10272;O95633
NaN	NaN	NaN	NaN	NaN	NaN	FALSE		-7,92E+18	NaN	NaN	NaN	0	81,051	8	9	130	1	1075	121,4	6,2	15629,1	191,81	7	9	A5A3E0	POTE ankyrin domain family member F OS=Homo sapiens OX=9606 GN=POTEF PE=1 SV=2	0	Pf00022, Pf12796, Pf14915	728378	ENSG00000196604	POTEF	A5A3E0;A6NC34;hsa:728378
7686200	673022	8473360	2621820	287314	49616,2	FALSE	Acetyl [N-Term];Met-loss+Acetyl [N-Term]	-8,65E+18	NaN	NaN	NaN	0	80,948	45	13	54	12	350	40,3	6,96	5000,85	77,91	8	12	Q12792	Twinfilin-1 OS=Homo sapiens OX=9606 GN=TWF1 PE=1 SV=3	0	Pf00241	5756	ENSG00000151239	TWF1	A8K5A8;B3KXS6;B4DLX9;hsa:5756;Q12792;Q59G07;Q5U0B1;Q6FHJ1;Q6FHL6;Q6NUK9;Q86XL6;Q8TCD3
1653610	1374610	1754330	6559590	10238700	1364,12	FALSE		-2,28E+18	NaN	NaN	NaN	0	80,855	49	17	85	12	415	46,3	6,3	5219,31	88,46	12	17	P05543	Thyroxine-binding globulin OS=Homo sapiens OX=9606 GN=SERPINA7 PE=1 SV=2	5	Pf00079	6906	ENSG00000123561	SERPINA7	D3DUX1;hsa:6906;P05543
4869150	2442100	5752250	1281420	2541570	64534,8	FALSE	Acetyl [N-Term];Met-loss+Acetyl [N-Term]	-2,56E+17	NaN	NaN	NaN	0	80,511	23	14	63	14	808	89,2	4,65	6842,03	90,46	9	13	Q32MZ4	Leucine-rich repeat flightless-interacting protein 1 OS=Homo sapiens OX=9606 GN=LRRFIP1 PE=1 SV=2	0	Pf09738	9208	ENSG00000124831	LRRFIP1	E9PGZ2;hsa:9208;O75766;O75799;Q32MZ4;Q32MZ5;Q53T49;Q6PKG2;Q9Y607
147144	75570,1	122944	NaN	NaN	NaN	FALSE		4,77E+18	NaN	NaN	NaN	0	80,357	62	12	118	1	184	21	6,67	11792,6	121,28	10	12	P62834	Ras-related protein Rap-1A OS=Homo sapiens OX=9606 GN=RAP1A PE=1 SV=1	0	Pf00071	5906	ENSG00000116473	RAP1A	hsa:5906;P10113;P62834
1936310	3528630	2510460	407379	214059	72634	FALSE	Acetyl [N-Term]	-4,83E+18	NaN	NaN	NaN	0	80,16	39	17	81	17	710	80,6	5,86	6979,87	64,69	13	17	P48147	Prolyl endopeptidase OS=Homo sapiens OX=9606 GN=PREP PE=1 SV=2	0	Pf00326, Pf02897	5550	ENSG00000085377	PREP	hsa:5550;P48147;Q8N6D4
2047660	3462390	3310410	3165,13	4942,69	4967,62	FALSE		1,73E+18	NaN	NaN	NaN	0	80,145	36	17	63	17	660	75,3	6,68	4188,16	45,61	14	16	P54136	Arginine--tRNA ligase, cytoplasmic OS=Homo sapiens OX=9606 GN=RARS1 PE=1 SV=2	0	Pf00750, Pf03485, Pf05746	5917	ENSG00000113643	RARS1	B2RBS9;hsa:5917;P54136;Q53GY4;Q9BWA1
1991370	506547	3254840	16738,8	38613,4	NaN	FALSE		1,43E+18	NaN	NaN	NaN	0	79,977	20	12	55	12	973	108,3	6,42	6705,05	64,69	10	11	P19021	Peptidyl-glycine alpha-amidating monooxygenase OS=Homo sapiens OX=9606 GN=PAM PE=1 SV=2	0	Pf01082, Pf01436, Pf03712	5066	ENSG00000145730	PAM	A6NMR0;A8K293;hsa:5066;O43211;O95080;P19021;Q16252;Q16253;Q54A45;Q86U53;Q8WVC7;Q9UCG0
3932920	2592180	3450680	12237000	28572700	818762	FALSE		-3,41E+18	NaN	NaN	NaN	0	79,795	44	11	117	11	347	38,2	6,95	12330,5	192,5	8	11	P02750	Leucine-rich alpha-2-glycoprotein OS=Homo sapiens OX=9606 GN=LRG1 PE=1 SV=2	0	Pf13855	116844	ENSG00000171236	LRG1	hsa:116844;P02750;Q8N4F5;Q96QZ4
53078400	76376200	36773700	29802700	32529200	14745100	FALSE		5,97E+18	NaN	NaN	NaN	0	79,616	79	8	208	8	105	11,7	4,92	18376,7	256,6	6	8	P10599	Thioredoxin OS=Homo sapiens OX=9606 GN=TXN PE=1 SV=3	0	Pf00085	7295	ENSG00000136810	TXN	B1ALW1;hsa:7295;O60744;P10599;Q53X69;Q96KI3;Q9UDG5
606157	259377	731903	11116500	9053610	451502	FALSE		2,4E+18	NaN	NaN	NaN	0	79,319	23	7	55	7	469	51,2	7,9	9290,8	121,67	5	7	P27918	Properdin OS=Homo sapiens OX=9606 GN=CFP PE=1 SV=2	0	Pf00090, Pf18487	5199	ENSG00000126759	CFP	hsa:5199;O15134;O15135;O15136;O75826;P27918
436461	2254040	699317	15888000	8876030	4303690	FALSE		-6,89E+18	NaN	NaN	NaN	0	79,044	42	12	105	12	292	32,2	5,41	11603,4	117,13	10	12	Q14165	Malectin OS=Homo sapiens OX=9606 GN=MLEC PE=1 SV=1	0	Pf11721	9761	ENSG00000110917	MLEC	hsa:9761;Q14165
1824650	4026450	2439270	459723	98515,2	277643	FALSE		1,54E+18	NaN	NaN	NaN	0	78,789	55	12	51	12	361	41,5	6,6	5164,6	85,22	8	12	Q15019	Septin-2 OS=Homo sapiens OX=9606 GN=SEPTIN2 PE=1 SV=1	0	Pf00735	4735	ENSG00000168385	SEPTIN2	B4DGE8;hsa:4735;Q14132;Q15019;Q53QU3;Q8IUK9;Q96CB0
13796100	14995200	7990100	819537	NaN	NaN	FALSE	Acetyl [N-Term];Met-loss+Acetyl [N-Term]	5,82E+18	NaN	NaN	NaN	0	78,683	35	5	55	4	95	10,9	5,5	6332,83	86,67	4	4	P61956	Small ubiquitin-related modifier 2 OS=Homo sapiens OX=9606 GN=SUMO2 PE=1 SV=3	0	Pf11976	6613	ENSG00000188612	SUMO2	B2R4I2;hsa:6613;P55855;P61956;Q32Q42;Q6IPZ6;Q96HK1
10108100	4635580	10828800	378076	196698	39607	FALSE	Acetyl [N-Term];Met-loss+Acetyl [N-Term]	-1,02E+18	NaN	NaN	NaN	0	78,542	67	14	65	13	285	31,1	5,81	5626,19	67,65	8	13	O94760	N(G),N(G)-dimethylarginine dimethylaminohydrolase 1 OS=Homo sapiens OX=9606 GN=DDAH1 PE=1 SV=3	1	Pf02274	23576	ENSG00000153904	DDAH1	hsa:23576;O94760;Q5HYC8;Q86XK5
6456480	3693030	9701080	NaN	112632	183187	FALSE	Acetyl [N-Term];Met-loss+Acetyl [N-Term]	-8,82E+18	NaN	NaN	NaN	0	77,679	50	15	73	15	380	42,9	6,8	6410,11	96,81	10	14	O75635	Serpin B7 OS=Homo sapiens OX=9606 GN=SERPINB7 PE=1 SV=1	0	Pf00079	8710	ENSG00000166396	SERPINB7	B4DUW8;F5GZC0;hsa:8710;O75635;Q1ED45;Q3KPG4
5295460	2854350	7237900	539263	1021160	30694,3	FALSE		-2,22E+18	NaN	NaN	NaN	0	77,499	49	10	58	10	344	37,4	6,24	7957,24	84,15	8	10	Q9UJ70	N-acetyl-D-glucosamine kinase OS=Homo sapiens OX=9606 GN=NAGK PE=1 SV=4	0	Pf01869	55577	ENSG00000124357	NAGK	B4DLZ5;hsa:55577;Q53HD5;Q6IA84;Q9BS29;Q9BVP0;Q9NV37;Q9UJ70
2453080	1494750	7619260	113181	24388,9	11399,2	FALSE		7,4E+18	NaN	NaN	NaN	0	77,39	15	13	47	13	1118	122,2	5,24	4821,07	63,76	9	12	Q14126	Desmoglein-2 OS=Homo sapiens OX=9606 GN=DSG2 PE=1 SV=2	0	Pf00028	1829	ENSG00000046604	DSG2	hsa:1829;Q14126;Q4KKU6
214514	310713	200903	190936	NaN	NaN	TRUE		1,47E+18	NaN	NaN	NaN	0	77,152	20	9	97	4	812	91,2	7,5	8659,66	182,45	4	9	P06868	SWISS-PROT:P06868 (Bos taurus) Plasminogen precursor	0	Pf00024, Pf00051, Pf00089	280897		PLG	bta:280897;P06868;Q28162
98814700	103554000	139080000	405275000	814123000	27505000	FALSE		7,72E+18	NaN	NaN	NaN	0	77,086	64	9	235	9	100	11,2	6,62	20413,2	332,67	7	9	P02652	Apolipoprotein A-II OS=Homo sapiens OX=9606 GN=APOA2 PE=1 SV=1	0	Pf04711	336	ENSG00000158874	APOA2	B2R524;hsa:336;P02652
1991790	1965070	2070240	13139400	6542540	1874200	FALSE		-7,89E+18	NaN	NaN	NaN	0	77,035	11	16	96	16	1404	151	9,51	7746,18	107,53	14	15	Q92954	Proteoglycan 4 OS=Homo sapiens OX=9606 GN=PRG4 PE=1 SV=3	0	Pf00045, Pf01033	10216	ENSG00000116690	PRG4	hsa:10216;Q6DNC4;Q6DNC5;Q6ZMZ5;Q92954;Q9BX49
17454400	7845300	25413800	642900	1028110	208023	FALSE		8,34E+18	NaN	NaN	NaN	0	76,423	45	10	63	10	303	33,8	7,11	6759,76	116,17	9	10	Q9UBR2	Cathepsin Z OS=Homo sapiens OX=9606 GN=CTSZ PE=1 SV=1	0	Pf00112	1522	ENSG00000101160	CTSZ	B2RC40;hsa:1522;O75331;Q9UBR2;Q9UQV5;Q9UQV6
571739	508755	603367	7313770	2991660	59613,6	FALSE		-2,6E+18	NaN	NaN	NaN	0	76,404	18	10	51	10	625	68,2	6,42	6213,65	58,93	9	10	Q14677	Clathrin interactor 1 OS=Homo sapiens OX=9606 GN=CLINT1 PE=1 SV=1	0	Pf01417	9685	ENSG00000113282	CLINT1	B7Z6F8;D3DQJ6;hsa:9685;Q14677;Q8NAF1;Q96E05
469440	209633	220667	19396900	12123600	3126610	FALSE	Met-loss [N-Term]	5,06E+18	NaN	NaN	NaN	0	76,151	87	11	60	11	107	12,3	6,71	7398,04	82,98	8	10	Q9UJC5	SH3 domain-binding glutamic acid-rich-like protein 2 OS=Homo sapiens OX=9606 GN=SH3BGRL2 PE=1 SV=2	0	Pf04908	83699	ENSG00000198478	SH3BGRL2	A8MQU2;hsa:83699;Q2VPC2;Q5VV96;Q6NSK8;Q6P9E8;Q7Z734;Q8IWD3;Q9BPY5;Q9UJC5
10497600	5801210	10800800	398215	300890	23025,3	FALSE		3,95E+18	NaN	NaN	NaN	0	76,103	45	9	53	9	224	25,2	9,28	7346,36	107,65	7	9	Q00688	Peptidyl-prolyl cis-trans isomerase FKBP3 OS=Homo sapiens OX=9606 GN=FKBP3 PE=1 SV=1	0	Pf00254, Pf18410	2287	ENSG00000100442	FKBP3	B2R4Q9;hsa:2287;Q00688;Q14317
5535900	14852100	14775800	481158	410460	84421,8	FALSE		-5E+18	NaN	NaN	NaN	0	75,925	39	14	46	14	533	56,6	6,71	4564,79	47,98	10	14	O43175	D-3-phosphoglycerate dehydrogenase OS=Homo sapiens OX=9606 GN=PHGDH PE=1 SV=4	0	Pf00389, Pf02826, Pf19304	26227	ENSG00000092621	PHGDH	B2RD08;hsa:26227;O43175;Q5SZU3;Q9BQ01
3662880	3951380	5183260	59451	372807	NaN	FALSE	Met-loss [N-Term]	-5,87E+18	NaN	NaN	NaN	0	75,449	33	14	52	14	514	58,7	6,43	5596,57	71,41	9	12	P49591	Serine--tRNA ligase, cytoplasmic OS=Homo sapiens OX=9606 GN=SARS1 PE=1 SV=3	0	Pf00587, Pf02403	6301	ENSG00000031698	SARS1	B2R6Y9;hsa:6301;P49591;Q5T5C8;Q9NSE3
3484200	2230770	2640270	376730	290921	84080,6	FALSE		-8,57E+18	NaN	NaN	NaN	0	75,374	63	13	49	10	289	32,6	6,92	4193,16	56,45	9	13	P46926	Glucosamine-6-phosphate isomerase 1 OS=Homo sapiens OX=9606 GN=GNPDA1 PE=1 SV=1	3	Pf01182	10007	ENSG00000113552	GNPDA1	B7Z3X4;D3DQE7;hsa:10007;P46926
13908900	20271700	21859200	5796290	5495300	8772400	FALSE		5,92E+16	NaN	NaN	NaN	0	75,158	58	9	78	9	173	18,8	6,68	8870,18	94,65	8	9	Q969H8	Myeloid-derived growth factor OS=Homo sapiens OX=9606 GN=MYDGF PE=1 SV=1	0	Pf10572	56005	ENSG00000074842	MYDGF	D6W628;hsa:56005;O75256;O75272;Q969H8;Q9BTK7;Q9NP69
24921100	14617400	26112000	4932200	2698950	413996	FALSE	Met-loss+Acetyl [N-Term]	-4,85E+18	NaN	NaN	NaN	0	75,144	87	14	111	14	184	20,8	5,31	10719	175,72	11	14	Q04760	Lactoylglutathione lyase OS=Homo sapiens OX=9606 GN=GLO1 PE=1 SV=4	0	Pf00903	2739	ENSG00000124767	GLO1	B2R6P7;B4DDV0;hsa:2739;P78375;Q04760;Q59EL0;Q5TZW3;Q96FC0;Q96J41
47865200	283923	54914300	17459300	4350080	NaN	FALSE		-1,64E+18	NaN	NaN	NaN	0	74,842	24	8	51	8	442	49,1	7,23	6321,81	117,15	6	8	Q9BRK3	Matrix remodeling-associated protein 8 OS=Homo sapiens OX=9606 GN=MXRA8 PE=1 SV=1	0	Pf07686	54587	ENSG00000162576	MXRA8	B3KTR6;B4DE34;hsa:54587;Q5TA39;Q96KC3;Q9BRK3
2872010	2435480	3263270	111175	88088	33455,4	FALSE		2,39E+18	NaN	NaN	NaN	0	74,773	28	12	45	12	759	85,2	6,84	3235,88	75,17	7	12	Q9UHB6	LIM domain and actin-binding protein 1 OS=Homo sapiens OX=9606 GN=LIMA1 PE=1 SV=1	0	Pf00412	51474	ENSG00000050405	LIMA1	B2RB09;hsa:51474;Q2TAN7;Q59FE8;Q9BVF2;Q9H8J1;Q9HBN5;Q9NX96;Q9NXC3;Q9NXU6;Q9P0H8;Q9UHB5;Q9UHB6
3671330	4628650	3079470	4387130	3783520	1366540	FALSE	Acetyl [N-Term]	-5,83E+18	NaN	NaN	NaN	0	74,576	82	15	87	15	206	22,2	5,36	8300,08	87,9	10	15	O43399	Tumor protein D54 OS=Homo sapiens OX=9606 GN=TPD52L2 PE=1 SV=2	0	Pf04201	7165	ENSG00000101150	TPD52L2	B4DPJ6;E1P5G7;hsa:7165;O43398;O43399;Q5JWU5;Q5JWU6;Q5JWU8;Q5U0E0;Q9H3Z6
2657030	2864430	5140650	37161,8	18912,8	27661,4	FALSE	Met-loss+Acetyl [N-Term]	-7,19E+17	NaN	NaN	NaN	0	74,49	54	17	64	17	422	47,4	6,48	6764,55	62,85	14	16	O00231	26S proteasome non-ATPase regulatory subunit 11 OS=Homo sapiens OX=9606 GN=PSMD11 PE=1 SV=3	0	Pf01399, Pf18055, Pf18503	5717	ENSG00000108671	PSMD11	A8K3I7;E1P663;hsa:5717;O00231;O00495;Q53FT5
1827030	2073600	3151590	239360	324748	65651,6	FALSE	Acetyl [N-Term];Met-loss+Acetyl [N-Term]	6,1E+18	NaN	NaN	NaN	0	74,33	55	12	28	12	366	41,2	5,02	1304,71	62,7	3	11	P52788	Spermine synthase OS=Homo sapiens OX=9606 GN=SMS PE=1 SV=2	0	Pf01564, Pf17284, Pf17950	6611	ENSG00000102172	SMS	A6NHA7;A6NI34;B2R9M0;hsa:6611;O00544;P52788;Q9UQS1
7331250	3822810	7656840	847104	763195	193686	FALSE	Met-loss [N-Term]	5,61E+17	NaN	NaN	NaN	0	74,191	18	10	62	10	454	50,6	9,38	8373,46	91,97	8	9	P42167	Lamina-associated polypeptide 2, isoforms beta/gamma OS=Homo sapiens OX=9606 GN=TMPO PE=1 SV=2	0	Pf03020, Pf08198	7112	ENSG00000120802	TMPO	A2T926;hsa:7112;P42167;Q14861
20475900	5652100	27710500	3659150	1951110	732035	FALSE		-4,71E+18	NaN	NaN	NaN	0	74,083	53	11	106	11	241	26,5	8,13	11302,3	115,37	10	11	P20618	Proteasome subunit beta type-1 OS=Homo sapiens OX=9606 GN=PSMB1 PE=1 SV=2	0	Pf00227	5689	ENSG00000008018	PSMB1	B5BU76;hsa:5689;P20618;Q9BWA8
139783	41000,4	242430	6714220	4056400	419285	FALSE		5,52E+17	NaN	NaN	NaN	0	74,039	17	12	60	12	1090	123,2	6,65	5931,28	68,26	8	12	Q70J99	Protein unc-13 homolog D OS=Homo sapiens OX=9606 GN=UNC13D PE=1 SV=1	0	Pf00168, Pf06292	201294	ENSG00000092929	UNC13D	B4DWG9;hsa:201294;Q70J99;Q9H7K5
4710940	127313	6354490	375854	274451	12730,2	FALSE		2,16E+18	NaN	NaN	NaN	0	74,011	32	7	64	5	271	30,5	6,29	7063,89	108,53	5	7	Q13162	Peroxiredoxin-4 OS=Homo sapiens OX=9606 GN=PRDX4 PE=1 SV=1	0	Pf00578, Pf10417	10549	ENSG00000123131	PRDX4	hsa:10549;Q13162;Q6FHT3
5663,44	26501,2	NaN	11419700	4200680	1021570	FALSE		1,5E+18	NaN	NaN	NaN	0	73,844	59	15	84	15	322	34,7	7,21	8010,55	75,71	13	15	P05089	Arginase-1 OS=Homo sapiens OX=9606 GN=ARG1 PE=1 SV=2	0	Pf00491	383	ENSG00000118520	ARG1	A6NEA0;hsa:383;P05089;Q5JWT5;Q5JWT6;Q8TE72;Q9BS50
341506	26069,5	361306	13036200	4347990	734957	FALSE	Met-loss+Acetyl [N-Term]	2,6E+18	NaN	NaN	NaN	0	73,803	62	7	32	7	146	16,2	6,92	3359,18	85,03	2	7	P32320	Cytidine deaminase OS=Homo sapiens OX=9606 GN=CDA PE=1 SV=2	0	Pf00383	978	ENSG00000158825	CDA	hsa:978;P32320
5093450	4224900	12141200	18094,8	51316,3	44606,7	FALSE	Acetyl [N-Term]	1,5E+18	NaN	NaN	NaN	0	73,673	62	12	52	12	264	29,6	5,74	3875,2	87,23	7	12	P40261	Nicotinamide N-methyltransferase OS=Homo sapiens OX=9606 GN=NNMT PE=1 SV=1	0	Pf01234	4837	ENSG00000166741	NNMT	hsa:4837;P40261
4591010	2330490	6208450	182726	175716	48137,7	FALSE	Met-loss+Acetyl [N-Term]	6,73E+18	NaN	NaN	NaN	0	72,877	39	11	51	11	428	49	5,67	4384,58	72,53	8	11	Q13838	Spliceosome RNA helicase DDX39B OS=Homo sapiens OX=9606 GN=DDX39B PE=1 SV=1	0	Pf00270, Pf00271	7919	ENSG00000198563;ENSG00000215425;ENSG00000225073;ENSG00000225859;ENSG00000229496;ENSG00000230624;ENSG00000235439	DDX39B	B0S8C0;hsa:7919;O43496;Q0EFA1;Q13838;Q2L6F9;Q53GL9;Q5RJ64;Q5RJ66;Q5ST94;Q5STB4;Q5STB5;Q5STB7;Q5STB8;Q5STU4;Q5STU5;Q5STU6;Q5STU8;Q71V76
391320	57127,8	401943	12818300	6565240	1239530	FALSE		-1,12E+18	NaN	NaN	NaN	0	72,835	23	14	72	14	738	82,5	6,99	7645,59	95,01	12	14	P16284	Platelet endothelial cell adhesion molecule OS=Homo sapiens OX=9606 GN=PECAM1 PE=1 SV=2	0	Pf13895, Pf17736	5175	ENSG00000261371	PECAM1	A0A075B738;A8K3S7;D3DU31;hsa:5175;P16284;Q6LDA9;Q8TBH1;Q96RF5;Q96RF6;Q9NP65;Q9NPB7;Q9NPG9;Q9NQS9;Q9NQT0;Q9NQT1;Q9NQT2
10581400	3065400	9065940	47328,4	108859	36174,7	FALSE	Acetyl [N-Term];Met-loss+Acetyl [N-Term]	-1,66E+17	NaN	NaN	NaN	0	72,829	24	13	28	13	825	90,5	6	1357,45	63,76	5	11	Q00839	Heterogeneous nuclear ribonucleoprotein U OS=Homo sapiens OX=9606 GN=HNRNPU PE=1 SV=6	0	Pf00622, Pf02037, Pf13671	3192	ENSG00000153187	HNRNPU	hsa:3192;O75507;Q00839;Q8N174;Q96HY9;Q9BQ09
3238850	1038080	1692580	43000	66324,4	13255,6	FALSE		-3,87E+18	NaN	NaN	NaN	0	72,627	29	15	59	15	704	80,6	6,64	6356,22	46,5	14	15	Q9BYT8	Neurolysin, mitochondrial OS=Homo sapiens OX=9606 GN=NLN PE=1 SV=1	0	Pf01432	57486	ENSG00000123213	NLN	hsa:57486;Q9BYT8;Q9ULJ4
38064100	8112740	35165800	124867000	210400000	10255200	FALSE		5,33E+18	NaN	NaN	NaN	0	72,618	43	10	375	7	201	23,6	5,11	38194,3	416,07	9	10	P19652	Alpha-1-acid glycoprotein 2 OS=Homo sapiens OX=9606 GN=ORM2 PE=1 SV=2	0	Pf00061	5005	ENSG00000228278	ORM2	B2R5L2;hsa:5005;P19652;Q16571;Q5T538;Q6IB74
2082660	548589	897125	NaN	NaN	NaN	FALSE		-4E+18	NaN	NaN	NaN	0	72,523	63	12	45	6	323	36,8	7,88	4421,09	66,37	6	12	Q04828	Aldo-keto reductase family 1 member C1 OS=Homo sapiens OX=9606 GN=AKR1C1 PE=1 SV=1	0	Pf00248	1645	ENSG00000187134	AKR1C1	hsa:1645;P52896;Q04828;Q5SR15;Q7M4N2;Q9UCX2
78362,2	97558,3	94044,6	1498190	3220570	290369	FALSE		-7,02E+18	NaN	NaN	NaN	0	72,33	48	9	113	4	270	30,6	6,38	8791,3	179,1	7	9	P36980	Complement factor H-related protein 2 OS=Homo sapiens OX=9606 GN=CFHR2 PE=1 SV=1	0	Pf00084	3080	ENSG00000080910	CFHR2	hsa:3080;P36980;Q14310;Q5T9T1
562234	282046	576435	3380440	10939700	739,122	FALSE		6,73E+18	NaN	NaN	NaN	0	72,313	37	14	71	14	427	48,5	7,75	7031,82	79,73	11	14	P29622	Kallistatin OS=Homo sapiens OX=9606 GN=SERPINA4 PE=1 SV=3	0	Pf00079	5267	ENSG00000100665	SERPINA4	hsa:5267;P29622;Q53XB5;Q86TR9;Q96BZ5
300688	251243	594469	9492930	3657930	2094730	FALSE		2,5E+18	NaN	NaN	NaN	0	72,179	30	13	75	13	592	67,5	4,6	10059,6	90,62	11	13	P27824	Calnexin OS=Homo sapiens OX=9606 GN=CANX PE=1 SV=2	0	Pf00262	821	ENSG00000127022;ENSG00000283777	CANX	B2R5V8;B4DGP8;B4E2T8;D3DWQ3;D6R9K3;hsa:821;P27824
6711630	764462	6034670	2703720	1947780	116282	FALSE		6,74E+18	NaN	NaN	NaN	0	72,111	41	10	88	10	370	40,5	5,1	10342	126,83	8	10	Q9UNZ2	NSFL1 cofactor p47 OS=Homo sapiens OX=9606 GN=NSFL1C PE=1 SV=2	0	Pf00789, Pf08059, Pf14555	55968	ENSG00000088833	NSFL1C	A2A2L1;B2RD74;hsa:55968;Q5JXA4;Q5JXA5;Q7Z533;Q9H102;Q9NVL9;Q9UI06;Q9UNZ2
1290660	7320130	1484150	295367	57222,8	NaN	FALSE	Met-loss+Acetyl [N-Term]	4,2E+18	NaN	NaN	NaN	0	72,096	47	10	32	10	350	38,4	5,12	3445,65	48,97	7	10	Q9Y3F4	Serine-threonine kinase receptor-associated protein OS=Homo sapiens OX=9606 GN=STRAP PE=1 SV=1	0	Pf00400	11171	ENSG00000023734	STRAP	B2R5S5;B4DNJ6;hsa:11171;Q5TZT4;Q9NTK0;Q9UQC8;Q9Y3F4
3248890	501009	5994250	5625710	4860740	520378	FALSE		8,47E+18	NaN	NaN	NaN	0	72,059	41	12	107	12	356	40,2	6,95	11417,3	149,67	9	12	Q12907	Vesicular integral-membrane protein VIP36 OS=Homo sapiens OX=9606 GN=LMAN2 PE=1 SV=1	0	Pf03388	10960	ENSG00000169223	LMAN2	hsa:10960;Q12907;Q53HH1
20570700	2583330	23238300	667466	911537	83488,4	FALSE	Met-loss [N-Term]	-2,32E+18	NaN	NaN	NaN	0	71,973	26	13	55	13	408	44,9	8,65	5122,3	86,3	9	12	Q8NC51	Plasminogen activator inhibitor 1 RNA-binding protein OS=Homo sapiens OX=9606 GN=SERBP1 PE=1 SV=2	0	Pf04774, Pf16174	26135	ENSG00000142864	SERBP1	hsa:26135;Q5VU19;Q5VU20;Q5VU22;Q8NC51;Q8WUH0;Q96SE2;Q9BTY3;Q9BUM4;Q9Y367;Q9Y4S3
10304900	2150310	7284810	38285100	40159000	1711700	FALSE		-6,43E+17	NaN	NaN	NaN	0	71,962	38	12	85	12	398	43,9	5,81	7992,33	130,63	9	12	O14791	Apolipoprotein L1 OS=Homo sapiens OX=9606 GN=APOL1 PE=1 SV=5	0	Pf05461	8542	ENSG00000100342	APOL1	A5PLQ4;B4DU12;E9PF24;hsa:8542;O14791;O60804;Q5R3P7;Q5R3P8;Q96AB8;Q96PM4;Q9BQ03
8077620	11047500	7264230	1624100	1161610	4111430	FALSE	Acetyl [N-Term];Met-loss+Acetyl [N-Term]	6,1E+17	NaN	NaN	NaN	0	71,89	90	12	71	12	158	18	8,66	6965,19	104	6	11	P63279	SUMO-conjugating enzyme UBC9 OS=Homo sapiens OX=9606 GN=UBE2I PE=1 SV=1	0	Pf00179	7329	ENSG00000103275	UBE2I	D3DU69;hsa:7329;P50550;P63279;Q15698;Q59GX1;Q86VB3
1067410	3288620	2194850	951360	770670	840879	FALSE		7,46E+18	NaN	NaN	NaN	0	71,849	11	15	50	15	1838	205	6,24	4785,59	50,96	13	15	O15031	Plexin-B2 OS=Homo sapiens OX=9606 GN=PLXNB2 PE=1 SV=3	0	Pf01403, Pf01437, Pf01833, Pf08337, Pf17960, Pf20170	23654	ENSG00000196576	PLXNB2	A6QRH0;hsa:23654;O15031;Q7KZU3;Q9BSU7
7049570	1084700	7973550	84670,9	71124,4	NaN	FALSE		-5,22E+18	NaN	NaN	NaN	0	71,773	74	7	55	7	154	16	5,6	4768,01	112,23	4	7	Q9UK76	Jupiter microtubule associated homolog 1 OS=Homo sapiens OX=9606 GN=JPT1 PE=1 SV=3	0	Pf17054	51155	ENSG00000189159	JPT1	B2R6K3;hsa:51155;Q53FG7;Q7Z2D2;Q7Z2F0;Q9UK76
6529990	6213850	6846440	22166,8	8941,46	102381	FALSE		-2,06E+18	NaN	NaN	NaN	0	71,759	30	14	65	14	570	63	5,08	4999,09	81,81	10	14	O95302	Peptidyl-prolyl cis-trans isomerase FKBP9 OS=Homo sapiens OX=9606 GN=FKBP9 PE=1 SV=2	0	Pf00254	11328	ENSG00000122642	FKBP9	B3KY35;B7Z1G9;B7Z6H3;hsa:11328;O95302;Q2M2A1;Q3MIR7;Q6IN76;Q6P2N1;Q96EX5;Q96IJ9
2017570	1216320	2537070	10686300	15185300	1856850	FALSE		6,12E+18	NaN	NaN	NaN	0	71,466	43	9	109	9	202	22,3	8,31	13393,8	169,11	8	9	P07360	Complement component C8 gamma chain OS=Homo sapiens OX=9606 GN=C8G PE=1 SV=3	0	Pf00061	733	ENSG00000176919	C8G	hsa:733;P07360;Q14CT8;Q14CU0;Q5SQ07
9953490	12339700	12860600	851460	7209880	427591	FALSE	Met-loss+Acetyl [N-Term]	5,91E+18	NaN	NaN	NaN	0	71,396	81	9	63	9	132	14,5	7,21	6025,96	109,96	7	9	P25398	40S ribosomal protein S12 OS=Homo sapiens OX=9606 GN=RPS12 PE=1 SV=3	0	Pf01248	6206	ENSG00000112306	RPS12	hsa:6206;P25398;Q76M58
2904680	2266090	4467630	22697,4	9227,32	8285,85	FALSE		-4,6E+18	NaN	NaN	NaN	0	71,32	25	15	54	15	953	105,8	5,39	5358,94	67,21	12	15	Q99460	26S proteasome non-ATPase regulatory subunit 1 OS=Homo sapiens OX=9606 GN=PSMD1 PE=1 SV=2	0	Pf01851, Pf13646, Pf18004	5707	ENSG00000173692	PSMD1	B8ZZH9;hsa:5707;Q24JU0;Q53TI2;Q6GMU5;Q6P2P4;Q6PJM7;Q6PKG9;Q86VU1;Q8IV79;Q99460
26031100	20038200	29940500	18796500	14097300	5158290	FALSE		8,17E+18	NaN	NaN	NaN	0	71,254	37	13	165	11	409	43,1	4,84	17917,7	179,06	12	13	P54727	UV excision repair protein RAD23 homolog B OS=Homo sapiens OX=9606 GN=RAD23B PE=1 SV=1	2	Pf00240, Pf00627, Pf09280	5887	ENSG00000119318	RAD23B	B3KWK8;G5E9P0;hsa:5887;P54727;Q7Z5K8;Q8WUB0
12392500	24720,3	15780700	5449900	3032120	125489	FALSE	Acetyl [N-Term];Met-loss+Acetyl [N-Term]	-5,47E+18	NaN	NaN	NaN	0	71,198	63	9	96	9	168	19,7	8,43	9986,31	116,64	7	8	P59998	Actin-related protein 2/3 complex subunit 4 OS=Homo sapiens OX=9606 GN=ARPC4 PE=1 SV=3	0	Pf05856	10093	ENSG00000241553	ARPC4	C9JWM7;E7ETI0;F6TTL5;hsa:10093;O15509;P59998;Q6P0W5;Q96QJ3
6248210	1485930	7023900	NaN	NaN	254259	FALSE		-6,95E+18	NaN	NaN	NaN	0	71,18	37	12	53	12	476	53,1	5,14	5222,71	91,1	9	12	P16870	Carboxypeptidase E OS=Homo sapiens OX=9606 GN=CPE PE=1 SV=1	0	Pf00246, Pf13620	1363	ENSG00000109472	CPE	A8K4N1;B3KR42;B4DFN4;D3DP33;hsa:1363;P16870;Q9UIU9
17381900	NaN	17429500	NaN	NaN	NaN	FALSE		6,17E+18	NaN	NaN	NaN	0	71,135	16	6	33	6	757	80,8	5,35	2083,58	88,14	3	6	Q9HCU0	Endosialin OS=Homo sapiens OX=9606 GN=CD248 PE=1 SV=1	0	Pf00059, Pf14670	57124	ENSG00000174807	CD248	hsa:57124;Q2M2V5;Q3SX55;Q96KB6;Q9HCU0
3692630	1354000	4746610	2422360	1479180	299123	FALSE		4,46E+18	NaN	NaN	NaN	0	70,956	36	14	64	14	406	46,9	5,26	4398,05	74,9	8	14	Q9BS26	Endoplasmic reticulum resident protein 44 OS=Homo sapiens OX=9606 GN=ERP44 PE=1 SV=1	0	Pf00085, Pf13848	23071	ENSG00000023318	ERP44	hsa:23071;O60319;Q4VXC1;Q5VWZ7;Q6UW14;Q8WX67;Q9BS26
5481440	6050900	8765380	538902	183136	2907,01	FALSE	Met-loss [N-Term]	-7,68E+18	NaN	NaN	NaN	0	70,794	52	11	58	11	196	22,2	5,57	6424,17	71,99	8	10	P30085	UMP-CMP kinase OS=Homo sapiens OX=9606 GN=CMPK1 PE=1 SV=3	0	Pf00406	51727	ENSG00000162368	CMPK1	B2R6S5;B4DPU7;E9PGI8;hsa:51727;P30085;Q53GB7;Q5SVZ0;Q96C07;Q9UBQ8;Q9UIA2
1352430	1491050	2536180	NaN	46073,1	27255,9	FALSE		-6E+18	NaN	NaN	NaN	0	70,554	31	12	53	12	680	77,8	6,7	5780,13	46,27	10	12	Q96AC1	Fermitin family homolog 2 OS=Homo sapiens OX=9606 GN=FERMT2 PE=1 SV=1	0	Pf00169, Pf00373, Pf18124	10979	ENSG00000073712	FERMT2	B5TJY2;hsa:10979;Q14840;Q86TY7;Q96AC1
1319110	1408460	1011120	1571410	1727010	NaN	FALSE		-4,67E+18	NaN	NaN	NaN	0	70,513	13	10	51	10	1104	122,8	5,83	5122,12	69,62	8	10	Q9BSJ8	Extended synaptotagmin-1 OS=Homo sapiens OX=9606 GN=ESYT1 PE=1 SV=1	0	Pf00168, Pf17047	23344	ENSG00000139641	ESYT1	A0FGR7;A8K2S2;hsa:23344;O94848;Q6PJN4;Q9BSJ8;Q9H6J1;Q9H6W2;Q9Y416
156016	132814	228700	3110500	5264970	14690,6	FALSE		-4,54E+18	NaN	NaN	NaN	0	70,258	23	14	54	14	840	92,3	6,37	5495,95	62,83	11	14	P80108	Phosphatidylinositol-glycan-specific phospholipase D OS=Homo sapiens OX=9606 GN=GPLD1 PE=1 SV=3	0	Pf00882, Pf01839	2822	ENSG00000112293	GPLD1	hsa:2822;P80108;Q15127;Q15128;Q2M2F2;Q5T3Y0;Q7Z6T8;Q8TCV0;Q8WW82;Q96ID6;Q9H167;Q9H4M1;Q9UJC9
1647260	886563	1896930	551290	300718	314,822	FALSE		3,91E+18	NaN	NaN	NaN	0	70,193	4	20	73	19	7388	837,8	5,39	5865,65	26,9	16	20	Q9UPN3	Microtubule-actin cross-linking factor 1, isoforms 1/2/3/4/5 OS=Homo sapiens OX=9606 GN=MACF1 PE=1 SV=4	0	Pf00307, Pf00435, Pf00681, Pf02187, Pf13499, Pf17902, Pf18373	23499	ENSG00000127603	MACF1	B1ALC5;E9PJT0;hsa:23499;O75053;Q5VW20;Q8WXY1;Q8WXY2;Q96PK2;Q9H540;Q9UKP0;Q9ULG9;Q9UPN3
4117800	3880990	6016690	54864,2	69431,3	27787	FALSE		3,91E+18	NaN	NaN	NaN	0	70,112	41	11	44	11	305	34	6,95	4029,52	83,25	7	11	Q9UJJ9	N-acetylglucosamine-1-phosphotransferase subunit gamma OS=Homo sapiens OX=9606 GN=GNPTG PE=1 SV=1	0	Pf13015	84572	ENSG00000090581	GNPTG	B2R556;hsa:84572;Q6XYD7;Q96L13;Q9UJJ9
5491770	3289660	10890900	858333	334500	143146	FALSE		5E+18	NaN	NaN	NaN	0	70,002	32	10	55	10	455	52,5	6,27	4014,43	75,63	8	10	Q13867	Bleomycin hydrolase OS=Homo sapiens OX=9606 GN=BLMH PE=1 SV=1	0	Pf03051	642	ENSG00000108578	BLMH	B2R796;hsa:642;Q13867;Q53F86;Q9UER9
43955	76187,4	31945,3	NaN	NaN	NaN	TRUE		8,16E+18	NaN	NaN	NaN	0	69,871	21	8	104	2	416	46,2	7,05	13631,4	135,22	8	8	Q95121	SWISS-PROT:Q95121 (Bos taurus) Pigment epithelium-derived factor precursor	0	Pf00079	281386	ENSBTAG00000009705	SERPINF1	bta:281386;Q2KIF6;Q95121
4912830	799611	6596700	NaN	28794,7	NaN	FALSE		1,87E+18	NaN	NaN	NaN	0	69,864	41	6	34	6	282	31,3	4,84	3063,02	110,45	4	6	Q07021	Complement component 1 Q subcomponent-binding protein, mitochondrial OS=Homo sapiens OX=9606 GN=C1QBP PE=1 SV=1	0	Pf02330	708	ENSG00000108561	C1QBP	hsa:708;Q07021;Q2HXR8;Q9NNY8
9803300	2232420	12103400	3046720	757089	853167	FALSE	Acetyl [N-Term]	-1,08E+18	NaN	NaN	NaN	0	69,798	70	8	65	8	201	22,8	7,02	7738,79	121,31	5	8	P49721	Proteasome subunit beta type-2 OS=Homo sapiens OX=9606 GN=PSMB2 PE=1 SV=1	0	Pf00227	5690	ENSG00000126067	PSMB2	D3DPS0;hsa:5690;P31145;P49721;Q9BWZ9
4157450	220366	3668540	13480,4	NaN	141126	FALSE		5,71E+18	NaN	NaN	NaN	0	69,778	13	12	56	12	1627	180,9	6,18	5622,74	71,41	9	12	Q13219	Pappalysin-1 OS=Homo sapiens OX=9606 GN=PAPPA PE=1 SV=3	0	Pf00084, Pf05572, Pf13385	5069	ENSG00000182752	PAPPA	B1AMF9;hsa:5069;Q08371;Q13219;Q68G52;Q9UDK7
3117410	1672210	3081460	191633	NaN	34390,3	FALSE	Acetyl [N-Term];Met-loss+Acetyl [N-Term]	-4,85E+18	NaN	NaN	NaN	0	69,754	18	13	22	13	906	100	6,29	1803,7	39,52	7	11	P35221	Catenin alpha-1 OS=Homo sapiens OX=9606 GN=CTNNA1 PE=1 SV=1	0	Pf01044	1495	ENSG00000044115	CTNNA1	hsa:1495;P35221;Q12795;Q8N1C0
2527950	2458760	3080300	507800	345445	23858,3	FALSE		-1,35E+18	NaN	NaN	NaN	0	69,629	35	14	55	14	623	69,9	5,67	5059,73	67,08	10	14	Q9NQW7	Xaa-Pro aminopeptidase 1 OS=Homo sapiens OX=9606 GN=XPNPEP1 PE=1 SV=3	0	Pf00557, Pf01321, Pf16188, Pf16189	7511	ENSG00000108039	XPNPEP1	A8K071;G5E9Y2;G8JLB2;hsa:7511;O15250;Q53EX6;Q8N3Q0;Q96D23;Q9NQW7
3970450	2309610	3477750	6710690	3083700	20665,8	FALSE		-2,02E+17	NaN	NaN	NaN	0	69,572	33	12	55	12	572	64,1	6,13	4979,21	76,31	9	12	P48163	NADP-dependent malic enzyme OS=Homo sapiens OX=9606 GN=ME1 PE=1 SV=1	0	Pf00390, Pf03949	4199	ENSG00000065833	ME1	B4DZ70;hsa:4199;P48163;Q16797;Q16855;Q53F72;Q5VWA2;Q9BWX8;Q9H1W3;Q9UIY4
221286	6796880	268729	57331200	112316000	27075700	FALSE		2,78E+17	NaN	NaN	NaN	0	69,247	48	7	100	4	101	10,8	8,62	12843,7	168,22	7	7	P02776	Platelet factor 4 OS=Homo sapiens OX=9606 GN=PF4 PE=1 SV=2	3	Pf00048	5196	ENSG00000163737	PF4	hsa:5196;P02776;Q53X61;Q9UC64;Q9UC65
1766360	2121260	3003640	62105	1066,3	4990730	FALSE	Acetyl [N-Term]	5,23E+17	NaN	NaN	NaN	0	68,93	35	14	58	14	522	58,7	6,33	6583,23	61,4	12	14	Q16222	UDP-N-acetylhexosamine pyrophosphorylase OS=Homo sapiens OX=9606 GN=UAP1 PE=1 SV=3	0	Pf01704	6675	ENSG00000117143	UAP1	B2R6R8;hsa:6675;Q16222;Q5VTA9;Q5VTB0;Q5VTB1;Q96GM2
7950250	2708600	7905170	583599	360319	30063,2	FALSE		1,97E+18	NaN	NaN	NaN	0	68,849	21	11	39	11	707	76,1	9,44	5333,12	72,49	9	11	P23246	Splicing factor, proline- and glutamine-rich OS=Homo sapiens OX=9606 GN=SFPQ PE=1 SV=2	0	Pf00076, Pf08075	6421	ENSG00000116560	SFPQ	hsa:6421;P23246;P30808;Q5SZ71
7755990	3447480	7107520	9395870	2615600	2789450	FALSE	Met-loss [N-Term]	-4,52E+18	NaN	NaN	NaN	0	68,847	61	10	67	10	118	12,7	7,3	8541,97	102,61	7	8	P30046	D-dopachrome decarboxylase OS=Homo sapiens OX=9606 GN=DDT PE=1 SV=3	0	Pf01187	1652	ENSG00000099977;ENSG00000275003	DDT	B7Z522;hsa:1652;O00774;O60787;P30046;Q13534
7757090	31863400	9472110	2812990	2016290	1576690	FALSE	Met-loss+Acetyl [N-Term]	1,99E+18	NaN	NaN	NaN	0	68,688	89	9	94	9	123	13,9	5,52	8034,93	109,29	6	9	Q9BRA2	Thioredoxin domain-containing protein 17 OS=Homo sapiens OX=9606 GN=TXNDC17 PE=1 SV=1	0	Pf06110	84817	ENSG00000129235	TXNDC17	A8K7E8;hsa:84817;Q9BRA2
2105090	124584	3826820	NaN	NaN	NaN	FALSE		-1,16E+18	NaN	NaN	NaN	0	68,578	28	9	41	8	541	61,4	7,99	4607,23	75,93	5	9	Q96MK3	Pseudokinase FAM20A OS=Homo sapiens OX=9606 GN=FAM20A PE=1 SV=4	0	Pf06702	54757	ENSG00000108950	FAM20A	B2RN47;B2RN49;hsa:54757;Q96MK3;Q9UF95
2705200	2479880	5038470	154898	348945	135062	FALSE		-6,82E+18	NaN	NaN	NaN	0	68,147	31	13	45	13	538	60,6	8,03	4423,59	36,63	9	13	P10155	RNA-binding protein RO60 OS=Homo sapiens OX=9606 GN=RO60 PE=1 SV=2	0	Pf05731	6738	ENSG00000116747	RO60	B2RBB9;hsa:6738;P10155;Q5LJ98;Q5LJ99;Q5LJA0;Q86WL3;Q86WL4;Q92787;Q9H1W6
2339520	1949950	2778330	133963	144970	NaN	FALSE	Acetyl [N-Term];Met-loss+Acetyl [N-Term]	-3,64E+18	NaN	NaN	NaN	0	68,138	46	11	39	11	312	34,3	8,43	4448,81	46,52	7	10	Q12904	Aminoacyl tRNA synthase complex-interacting multifunctional protein 1 OS=Homo sapiens OX=9606 GN=AIMP1 PE=1 SV=2	0	Pf01588	9255	ENSG00000164022	AIMP1	B3KTR2;B4E1S7;hsa:9255;Q12904;Q6FG28;Q96CQ9
2111260	372943	2259510	10405100	19881400	256820	FALSE		1,18E+18	NaN	NaN	NaN	0	68,095	35	11	96	11	405	45,1	6,04	11921,1	134,33	9	11	P08185	Corticosteroid-binding globulin OS=Homo sapiens OX=9606 GN=SERPINA6 PE=1 SV=1	0	Pf00079	866	ENSG00000170099;ENSG00000277405	SERPINA6	A8K456;hsa:866;P08185;Q7Z2Q9
1512480	54794,7	6633180	27524,6	51613,2	NaN	FALSE		8,67E+18	NaN	NaN	NaN	0	68,012	28	10	37	9	584	66,2	7,74	4366,47	61,46	6	10	Q8IXL6	Extracellular serine/threonine protein kinase FAM20C OS=Homo sapiens OX=9606 GN=FAM20C PE=1 SV=2	1	Pf06702	56975	ENSG00000177706;ENSG00000288499	FAM20C	A4D2Q5;hsa:56975;L8B5W8;Q5I0W9;Q7Z4I0;Q8IXL6;Q9NPT2
5870790	4067090	12889400	8907640	4933240	2505170	FALSE		-7,17E+18	NaN	NaN	NaN	0	67,997	49	10	126	7	249	28,6	4,09	14289,8	154,35	8	10	P39687	Acidic leucine-rich nuclear phosphoprotein 32 family member A OS=Homo sapiens OX=9606 GN=ANP32A PE=1 SV=1	3	Pf14580	8125	ENSG00000140350	ANP32A	B2R6T4;hsa:8125;P39687;Q53FK4;Q5J8L8;Q7M4N6
83296,9	61168,1	22183,6	3126670	3430690	1249790	FALSE		5,35E+18	NaN	NaN	NaN	0	67,916	17	13	57	13	1130	126,5	6,61	6011,94	66,25	9	13	P23229	Integrin alpha-6 OS=Homo sapiens OX=9606 GN=ITGA6 PE=1 SV=5	0	Pf01839, Pf08441	3655	ENSG00000091409	ITGA6	B2RMU9;B4DG69;B4DKB8;C4AM96;G5E9H1;hsa:3655;P23229;Q08443;Q0MRC7;Q14646;Q16508;Q53RX7;Q59HB7;Q86VL6;Q9UCT1;Q9UN03
2894400	1664160	4120120	1350360	1170700	96345,1	FALSE		-2,84E+18	NaN	NaN	NaN	0	67,819	50	11	53	3	330	37,5	6,33	6320,09	68,42	9	11	P62136	Serine/threonine-protein phosphatase PP1-alpha catalytic subunit OS=Homo sapiens OX=9606 GN=PPP1CA PE=1 SV=1	8	Pf00149, Pf16891	5499	ENSG00000172531	PPP1CA	A6NNR3;B2R908;hsa:5499;P08129;P20653;P22802;P62136;Q07161
2497030	4928260	1641160	4162940	1701490	896635	FALSE		2,68E+18	NaN	NaN	NaN	0	67,816	29	7	64	7	250	26,1	8,56	7152,15	68,93	7	7	P17931	Galectin-3 OS=Homo sapiens OX=9606 GN=LGALS3 PE=1 SV=5	0	Pf00337	3958	ENSG00000131981	LGALS3	B2RC38;hsa:3958;P17931;Q16005;Q6IBA7;Q96J47
18907000	235702	20706800	4075440	3699440	1949400	FALSE		2,22E+18	NaN	NaN	NaN	0	67,568	47	14	76	14	397	45,4	6,16	7308,4	74,04	11	14	P48595	Serpin B10 OS=Homo sapiens OX=9606 GN=SERPINB10 PE=1 SV=1	0	Pf00079	5273	ENSG00000242550	SERPINB10	hsa:5273;P48595;Q4VAX4;Q4VAX7
4515270	6974910	9974770	NaN	NaN	59671,5	FALSE		3,04E+18	NaN	NaN	NaN	0	67,458	46	11	46	11	297	34,3	9,72	4833,2	64,7	9	11	P46777	60S ribosomal protein L5 OS=Homo sapiens OX=9606 GN=RPL5 PE=1 SV=3	0	Pf14204, Pf17144	6125	ENSG00000122406	RPL5	hsa:6125;P46777;Q32LZ3;Q53HH6;Q9H3F4
15336000	2890120	20632100	10916900	8427040	21376,2	FALSE		-6,42E+18	NaN	NaN	NaN	0	67,408	49	10	96	10	205	22,8	6,4	9088,78	148,56	7	10	P04792	Heat shock protein beta-1 OS=Homo sapiens OX=9606 GN=HSPB1 PE=1 SV=2	0	Pf00011	3315	ENSG00000106211	HSPB1	B2R4N8;hsa:3315;P04792;Q6FI47;Q96C20;Q96EI7;Q9UC31;Q9UC34;Q9UC35;Q9UC36
1518370	6754,41	636446	7065260	2530640	789528	FALSE		-9,12E+18	NaN	NaN	NaN	0	67,356	56	11	76	11	195	21,6	6,34	8851,97	95,48	10	11	Q9ULZ3	Apoptosis-associated speck-like protein containing a CARD OS=Homo sapiens OX=9606 GN=PYCARD PE=1 SV=2	0	Pf00619, Pf02758	29108	ENSG00000103490	PYCARD	hsa:29108;Q96D12;Q9BSZ5;Q9HBD0;Q9NXJ8;Q9ULZ3
4522090	4198620	11670400	648029	594555	16092,2	FALSE		3,3E+18	NaN	NaN	NaN	0	67,279	25	10	37	10	703	67,2	8,98	2379,02	58,57	4	10	P25067	Collagen alpha-2(VIII) chain OS=Homo sapiens OX=9606 GN=COL8A2 PE=1 SV=2	0	Pf00386, Pf01391	1296	ENSG00000171812	COL8A2	hsa:1296;P25067;Q5JV31;Q8TEJ5
5637670	3139770	7261210	4825,16	44533,8	NaN	FALSE		3,67E+18	NaN	NaN	NaN	0	67,25	23	10	46	10	746	86,2	9,04	3831,62	80,67	5	10	Q16394	Exostosin-1 OS=Homo sapiens OX=9606 GN=EXT1 PE=1 SV=2	0	Pf03016, Pf09258	2131	ENSG00000182197	EXT1	B2R7V2;hsa:2131;Q16394;Q9BVI9
2056460	2217660	2361350	49236,3	58433,4	61828,7	FALSE	Acetyl [N-Term];Met-loss+Acetyl [N-Term]	5,96E+18	NaN	NaN	NaN	0	66,827	51	8	28	8	245	26,6	4,68	2488,46	64,5	3	7	P56537	Eukaryotic translation initiation factor 6 OS=Homo sapiens OX=9606 GN=EIF6 PE=1 SV=1	0	Pf01912	3692	ENSG00000242372	EIF6	B7ZBG9;hsa:3692;P56537;Q6IBN8;Q96TD5
2995340	1554680	2779330	28789600	23218000	10396000	FALSE	Acetyl [N-Term];Met-loss [N-Term];Met-loss+Acetyl [N-Term]	2,94E+18	NaN	NaN	NaN	0	66,797	30	8	74	2	219	21,9	11,03	9657,61	96,4	7	7	P10412	Histone H1.4 OS=Homo sapiens OX=9606 GN=H1-4 PE=1 SV=2	0	Pf00538	3008	ENSG00000168298	H1-4	hsa:3008;P10412;Q4VB25
4759880	2542890	1885360	167653	459371	6605,98	FALSE	Acetyl [N-Term];Met-loss+Acetyl [N-Term]	-1,96E+18	NaN	NaN	NaN	0	66,737	72	10	24	10	161	18,1	6,79	2202,66	51,27	4	9	Q9H2H8	Peptidyl-prolyl cis-trans isomerase-like 3 OS=Homo sapiens OX=9606 GN=PPIL3 PE=1 SV=1	0	Pf00160	53938	ENSG00000240344	PPIL3	hsa:53938;Q86WF9;Q96IA9;Q9BXZ1;Q9H2H8
1656440	729064	1836620	208075	105605	NaN	FALSE		-4,91E+18	NaN	NaN	NaN	0	66,701	17	10	48	6	633	70,9	8,13	6080,91	56,4	10	10	O43390	Heterogeneous nuclear ribonucleoprotein R OS=Homo sapiens OX=9606 GN=HNRNPR PE=1 SV=1	0	Pf00076, Pf18360	10236	ENSG00000125944;ENSG00000282958	HNRNPR	hsa:10236;O43390;Q2L7G6;Q5TEH1;Q9BV64;S4R3J4
5540710	2867310	2173920	49227,6	276180	NaN	FALSE		-5,48E+18	NaN	NaN	NaN	0	66,634	49	10	47	10	325	34,8	7,5	6217,22	73,59	8	10	P18065	Insulin-like growth factor-binding protein 2 OS=Homo sapiens OX=9606 GN=IGFBP2 PE=1 SV=2	0	Pf00086, Pf00219	3485	ENSG00000115457	IGFBP2	hsa:3485;P18065;Q14619;Q9UCL3
1174590	427007	1474080	12267300	13431300	2205490	FALSE		3,74E+18	NaN	NaN	NaN	0	66,547	68	13	92	13	217	25,2	6,32	8744,05	89,81	11	13	P62993	Growth factor receptor-bound protein 2 OS=Homo sapiens OX=9606 GN=GRB2 PE=1 SV=1	0	Pf00017, Pf00018	2885	ENSG00000177885	GRB2	hsa:2885;P29354;P62993;Q14450;Q63057;Q63059
5134420	2916550	4506730	1519640	1584020	NaN	FALSE	Met-loss+Acetyl [N-Term]	-4,33E+18	NaN	NaN	NaN	0	66,423	30	6	35	6	391	45,3	4,46	2608,67	100,01	2	6	P55209	Nucleosome assembly protein 1-like 1 OS=Homo sapiens OX=9606 GN=NAP1L1 PE=1 SV=1	0	Pf00956	4673	ENSG00000187109	NAP1L1	B3KNT8;B3KV44;hsa:4673;P55209
18405400	601836	15569200	17646900	11481800	564920	FALSE		9,09E+18	NaN	NaN	NaN	0	66,182	63	10	119	10	105	11,7	9,57	14768,4	138,93	10	10	P99999	Cytochrome c OS=Homo sapiens OX=9606 GN=CYCS PE=1 SV=2	0	Pf00034	54205	ENSG00000172115	CYCS	A4D166;B2R4I1;hsa:54205;P00001;P99999;Q6NUR2;Q6NX69;Q96BV4
919828	5481,18	859565	1907640	2295950	NaN	FALSE		-2,17E+17	NaN	NaN	NaN	0	65,996	17	11	44	11	1249	135,5	5,38	3152,1	53,56	7	11	Q27J81	Inverted formin-2 OS=Homo sapiens OX=9606 GN=INF2 PE=1 SV=2	0	Pf02181, Pf02205, Pf06367, Pf06371	64423	ENSG00000203485	INF2	hsa:64423;Q27J81;Q27J83;Q69YL8;Q6P1X7;Q6PK22;Q86TR7;Q9BRM1;Q9H6N1
1465350	207045	2470030	4962690	5733240	279938	FALSE		-5,69E+18	NaN	NaN	NaN	0	65,652	9	15	67	14	1914	210,6	6,15	6313,67	66,06	13	15	Q15746	Myosin light chain kinase, smooth muscle OS=Homo sapiens OX=9606 GN=MYLK PE=1 SV=4	1	Pf00041, Pf00069, Pf07679, Pf16620	4638	ENSG00000065534	MYLK	B4DUE3;D3DN97;hsa:4638;O95796;O95797;O95798;O95799;Q14844;Q15746;Q16794;Q17S15;Q3ZCP9;Q5MY99;Q5MYA0;Q6P2N0;Q7Z4J0;Q9C0L5;Q9UBG5;Q9UBY6;Q9UIT9
3413300	1970440	3327660	8773350	4199050	7865790	FALSE	Met-loss+Acetyl [N-Term]	-3,82E+17	NaN	NaN	NaN	0	65,541	44	14	89	14	358	40,6	5,94	6975,75	110	10	13	Q15257	Serine/threonine-protein phosphatase 2A activator OS=Homo sapiens OX=9606 GN=PTPA PE=1 SV=3	0	Pf03095	5524	ENSG00000119383	PTPA	A2A347;A9IZU4;B4DXM4;hsa:5524;Q15257;Q15258;Q53GZ3;Q5TZQ2;Q9BUK1;Q9NNZ7;Q9NNZ8;Q9NNZ9
3064940	2504410	3051250	2079780	4710590	828180	FALSE		8,32E+18	NaN	NaN	NaN	0	65,523	39	13	89	13	412	44,5	6,54	7338,85	103,48	7	13	P07339	Cathepsin D OS=Homo sapiens OX=9606 GN=CTSD PE=1 SV=1	0	Pf00026, Pf07966	1509	ENSG00000117984	CTSD	hsa:1509;P07339;Q6IB57
10100600	14785500	13079800	9130490	4637680	958424	FALSE	Met-loss [N-Term]	-6,53E+18	NaN	NaN	NaN	0	65,362	42	9	59	9	178	20,5	8,59	8365,58	80,41	7	8	O15145	Actin-related protein 2/3 complex subunit 3 OS=Homo sapiens OX=9606 GN=ARPC3 PE=1 SV=3	0	Pf04062	10094	ENSG00000111229	ARPC3	hsa:10094;O00554;O15145
40678,4	3887,42	NaN	41042700	13999800	8571250	FALSE	Met-loss [N-Term];Met-loss+Acetyl [N-Term]	-6,21E+18	NaN	NaN	NaN	0	65,323	83	8	47	8	95	10,4	4,88	3808,37	50,38	5	8	P25815	Protein S100-P OS=Homo sapiens OX=9606 GN=S100P PE=1 SV=2	0	Pf01023	6286	ENSG00000163993	S100P	hsa:6286;P25815;Q5J7W2
678320	351746	750246	51577	30398,3	19644	FALSE	Met-loss+Acetyl [N-Term]	4,69E+18	NaN	NaN	NaN	0	65,254	46	10	49	3	327	37,2	6,19	6011,89	68	8	10	P62140	Serine/threonine-protein phosphatase PP1-beta catalytic subunit OS=Homo sapiens OX=9606 GN=PPP1CB PE=1 SV=3	0	Pf00149, Pf16891	5500	ENSG00000213639	PPP1CB	B2R5V4;D6W565;hsa:5500;P37140;P62140;Q5U087;Q6FG45
5087500	329780	5015630	803003	167610	24180,4	FALSE		7,5E+18	NaN	NaN	NaN	0	65,042	25	12	49	12	753	83,1	6,86	5440,25	65,43	9	12	P58215	Lysyl oxidase homolog 3 OS=Homo sapiens OX=9606 GN=LOXL3 PE=1 SV=1	0	Pf00530, Pf01186	84695	ENSG00000115318	LOXL3	D6W5J1;hsa:84695;P58215;Q2EHP2;Q6IPL7;Q96RS1
1573320	2082850	2502720	56788,1	52065,4	NaN	FALSE		3,74E+18	NaN	NaN	NaN	0	64,931	19	9	37	7	592	61,8	8,02	4649,23	63,86	7	9	Q92804	TATA-binding protein-associated factor 2N OS=Homo sapiens OX=9606 GN=TAF15 PE=1 SV=1	0	Pf00076, Pf00641	8148	ENSG00000270647;ENSG00000276833	TAF15	B2R837;hsa:8148;Q86X94;Q92751;Q92804
1217130	3624570	1837670	919071	607428	1975400	FALSE		-3,04E+18	NaN	NaN	NaN	0	64,595	42	10	35	10	376	42,6	6,64	3534,55	46,55	7	10	P61163	Alpha-centractin OS=Homo sapiens OX=9606 GN=ACTR1A PE=1 SV=1	0	Pf00022	10121	ENSG00000138107	ACTR1A	B2R6B0;hsa:10121;P42024;P61163
8718290	6112190	10290400	6906570	7064310	1622620	FALSE		-1,82E+18	NaN	NaN	NaN	0	64,542	66	10	91	9	151	16,3	5,67	9886,59	139,43	8	10	O15511	Actin-related protein 2/3 complex subunit 5 OS=Homo sapiens OX=9606 GN=ARPC5 PE=1 SV=3	1	Pf04699	10092	ENSG00000162704	ARPC5	A6NEC4;hsa:10092;O15511;Q6PG42
2106200	898495	2137740	6590320	12059800	546370	FALSE		-1,83E+18	NaN	NaN	NaN	0	64,472	47	9	70	9	202	22,5	5,67	8306,66	103,16	7	9	P05452	Tetranectin OS=Homo sapiens OX=9606 GN=CLEC3B PE=1 SV=3	0	Pf00059	7123	ENSG00000163815	CLEC3B	hsa:7123;P05452;Q6FGX6
4100260	1761470	3407630	17633900	22559600	3840030	FALSE		8,61E+18	NaN	NaN	NaN	0	64,454	40	9	95	8	327	37	5,57	11366,4	164,52	7	9	Q15555	Microtubule-associated protein RP/EB family member 2 OS=Homo sapiens OX=9606 GN=MAPRE2 PE=1 SV=1	0	Pf00307, Pf03271	10982	ENSG00000166974	MAPRE2	B2RE21;B3KR39;B4DJV4;B7Z2L3;E9PHR3;F5H1V8;G5E9I6;hsa:10982;Q15555;Q9UQ33
55931,4	68978,3	63140,7	7843740	16070200	416822	FALSE		-4,16E+18	NaN	NaN	NaN	0	64,359	32	8	51	8	458	52,3	7,34	5425,04	98,42	5	8	P15169	Carboxypeptidase N catalytic chain OS=Homo sapiens OX=9606 GN=CPN1 PE=1 SV=1	0	Pf00246, Pf13620	1369	ENSG00000120054	CPN1	B1AP59;hsa:1369;P15169
173852	21657,5	127830	3537770	3724710	361214	FALSE		-5,1E+18	NaN	NaN	NaN	0	64,259	10	10	48	9	1575	180,5	5,64	3966,64	62,15	7	10	Q13576	Ras GTPase-activating-like protein IQGAP2 OS=Homo sapiens OX=9606 GN=IQGAP2 PE=1 SV=4	0	Pf00307, Pf00612, Pf00616, Pf03836	10788	ENSG00000145703	IQGAP2	A8K4V1;B7Z8A4;hsa:10788;J3KR91;Q13576
2696100	2779770	3451380	2614600	2469860	739704	FALSE		4,89E+18	NaN	NaN	NaN	0	64,171	59	12	66	12	239	27,4	5,73	6635,41	71,95	10	12	Q9UL46	Proteasome activator complex subunit 2 OS=Homo sapiens OX=9606 GN=PSME2 PE=1 SV=4	0	Pf02251, Pf02252	5721	ENSG00000100911;ENSG00000284889	PSME2	hsa:5721;Q15129;Q9UL46
1749740	929505	3503520	92938,6	157656	61868,5	FALSE		-1,87E+18	NaN	NaN	NaN	0	64,109	28	11	29	11	835	88,5	5,77	2545,8	61,43	5	11	Q13263	Transcription intermediary factor 1-beta OS=Homo sapiens OX=9606 GN=TRIM28 PE=1 SV=5	0	Pf00628, Pf00643, Pf14634	10155	ENSG00000130726	TRIM28	hsa:10155;O00677;Q13263;Q7Z632;Q93040;Q96IM1
8528170	4593670	7913370	17714,3	55198,6	26778,7	FALSE		3,1E+18	NaN	NaN	NaN	0	64,005	16	8	72	8	554	60,1	5,29	8667,09	94,94	8	8	P09603	Macrophage colony-stimulating factor 1 OS=Homo sapiens OX=9606 GN=CSF1 PE=1 SV=2	0	Pf05337	1435	ENSG00000184371	CSF1	A8K6J5;hsa:1435;P09603;Q13130;Q14086;Q14806;Q5VVF3;Q5VVF4;Q9UQR8
11512100	12257300	18483200	NaN	7625,18	NaN	FALSE		-6,45E+17	NaN	NaN	NaN	0	63,89	14	9	77	9	713	78,2	4,98	6643,02	92,78	7	9	P55290	Cadherin-13 OS=Homo sapiens OX=9606 GN=CDH13 PE=1 SV=1	0	Pf00028, Pf08758	1012	ENSG00000140945	CDH13	A8W476;A8W477;B7Z590;C9JRI6;hsa:1012;J3KN62;P55290;Q6GTW4;Q8TBX3
3958790	2535360	2262640	64727,9	NaN	96973,9	FALSE		-8,95E+18	NaN	NaN	NaN	0	63,88	47	9	26	9	243	27,3	5,08	2129,54	62,81	5	9	Q9H1E3	Nuclear ubiquitous casein and cyclin-dependent kinase substrate 1 OS=Homo sapiens OX=9606 GN=NUCKS1 PE=1 SV=1	0		64710	ENSG00000069275	NUCKS1	hsa:64710;Q54AC0;Q5PXE7;Q9H1D6;Q9H1E3;Q9H723
6309650	738188	6801260	14523800	13611400	200324	FALSE	Met-loss+Acetyl [N-Term]	-3,91E+18	NaN	NaN	NaN	0	63,847	64	12	103	8	181	20,7	6,8	11549,2	150,82	9	12	P84077	ADP-ribosylation factor 1 OS=Homo sapiens OX=9606 GN=ARF1 PE=1 SV=2	4	Pf00025	375	ENSG00000143761	ARF1	hsa:375;P10947;P32889;P84077
1262300	12229,4	1067280	9408620	9957470	52839,8	FALSE		8,08E+18	NaN	NaN	NaN	0	63,78	41	8	50	8	299	32,9	6,67	4510,36	92,96	5	8	O75636	Ficolin-3 OS=Homo sapiens OX=9606 GN=FCN3 PE=1 SV=2	0	Pf00147	8547	ENSG00000142748	FCN3	hsa:8547;O75636;Q6IBJ5;Q8WW86
6029600	255453	7794110	297816	253134	NaN	FALSE		-8,31E+18	NaN	NaN	NaN	0	63,769	34	13	62	12	529	60,7	5,16	5693	73,24	10	13	P06865	Beta-hexosaminidase subunit alpha OS=Homo sapiens OX=9606 GN=HEXA PE=1 SV=2	1	Pf00728, Pf14845	3073	ENSG00000213614	HEXA	B4DKE7;E7ENH7;hsa:3073;P06865;Q53HS8;Q6AI32
4356150	1172770	5550580	59736,7	NaN	NaN	FALSE		7,41E+18	NaN	NaN	NaN	0	63,726	30	9	36	9	574	63,1	7,52	2999,87	70,31	5	9	Q08397	Lysyl oxidase homolog 1 OS=Homo sapiens OX=9606 GN=LOXL1 PE=1 SV=2	0	Pf01186	4016	ENSG00000129038	LOXL1	hsa:4016;Q08397;Q6NUL3;Q96BW7
3163970	2511150	3736160	25003,8	11407,9	214594	FALSE	Met-loss+Acetyl [N-Term]	1,86E+18	NaN	NaN	NaN	0	63,718	51	9	35	9	322	35,5	5,48	2299,98	68,34	5	9	P55735	Protein SEC13 homolog OS=Homo sapiens OX=9606 GN=SEC13 PE=1 SV=3	0	Pf00400	6396	ENSG00000157020	SEC13	A8MV37;B4DXJ1;hsa:6396;P55735;Q5BJF0;Q9BRM6;Q9BUG7
4751650	NaN	3703780	708937	429108	24457,1	FALSE		2,09E+18	NaN	NaN	NaN	0	63,635	50	8	31	8	361	40,9	6,61	1372,56	56,39	3	8	Q16769	Glutaminyl-peptide cyclotransferase OS=Homo sapiens OX=9606 GN=QPCT PE=1 SV=1	0	Pf04389	25797	ENSG00000115828	QPCT	hsa:25797;Q16769;Q16770;Q3KRG6;Q53TR4
3146150	3186340	3430970	5106700	1710190	5381050	FALSE		-6,14E+18	NaN	NaN	NaN	0	63,452	56	12	102	10	207	22	9,38	6409,74	136,92	8	12	P30405	Peptidyl-prolyl cis-trans isomerase F, mitochondrial OS=Homo sapiens OX=9606 GN=PPIF PE=1 SV=1	2	Pf00160	10105	ENSG00000108179	PPIF	hsa:10105;P30405;Q2YDB7;Q5W131
2660110	3223750	4041630	1388030	1988220	NaN	FALSE		-6,92E+18	NaN	NaN	NaN	0	63,426	36	12	52	12	430	48,2	5,05	5877,06	58,76	10	12	Q9UJU6	Drebrin-like protein OS=Homo sapiens OX=9606 GN=DBNL PE=1 SV=1	0	Pf00241, Pf14604	28988	ENSG00000136279	DBNL	A4D2I9;B4DDP6;B4DEM2;C9J7P1;hsa:28988;P84070;Q6IAI8;Q96F30;Q96K74;Q9HBN8;Q9NR72;Q9UJU6
3010080	2284970	5496950	32751,4	68525,5	NaN	FALSE		2,43E+18	NaN	NaN	NaN	0	63,411	25	8	37	8	465	52,9	7,25	6229,39	73,7	6	8	O60687	Sushi repeat-containing protein SRPX2 OS=Homo sapiens OX=9606 GN=SRPX2 PE=1 SV=1	0	Pf00084, Pf02494, Pf13778	27286	ENSG00000102359	SRPX2	B3KQT3;hsa:27286;O60687;Q8WW85
2487580	2066900	3497720	161597	94293,2	1377510	FALSE		-1,01E+18	NaN	NaN	NaN	0	63,317	49	7	42	6	185	21,4	4,93	4954,79	76,6	5	7	P83916	Chromobox protein homolog 1 OS=Homo sapiens OX=9606 GN=CBX1 PE=1 SV=1	1	Pf00385, Pf01393	10951	ENSG00000108468	CBX1	hsa:10951;P23197;P83916
1695990	387259	3420030	171389	369240	12845,8	FALSE		8,22E+18	NaN	NaN	NaN	0	63,236	13	11	47	10	1390	155,4	7,33	5008,78	53,51	8	11	P08581	Hepatocyte growth factor receptor OS=Homo sapiens OX=9606 GN=MET PE=1 SV=4	1	Pf01403, Pf01437, Pf01833, Pf07714	4233	ENSG00000105976	MET	A1L467;B5A932;E7EQ94;hsa:4233;O60366;P08581;Q12875;Q9UDX7;Q9UPL8
4900240	8717940	3833570	NaN	403227	20854,2	FALSE		2,14E+18	NaN	NaN	NaN	0	63,117	27	8	44	8	274	30,8	8,88	5901,65	66,9	5	8	P15559	NAD(P)H dehydrogenase [quinone] 1 OS=Homo sapiens OX=9606 GN=NQO1 PE=1 SV=1	0	Pf02525	1728	ENSG00000181019	NQO1	B2R5Y9;B4DNM7;B7ZAD1;hsa:1728;P15559;Q86UK1
3590640	1651620	4992820	20960,1	85319,8	7219,04	FALSE		-9,12E+17	NaN	NaN	NaN	0	63,021	21	9	38	9	630	68	5,01	5596,94	70,18	6	9	P08195	4F2 cell-surface antigen heavy chain OS=Homo sapiens OX=9606 GN=SLC3A2 PE=1 SV=3	0	Pf00128, Pf16028	6520	ENSG00000168003	SLC3A2	hsa:6520;P08195;Q13543
5171180	5926850	6892770	2202,66	NaN	NaN	FALSE		2,96E+18	NaN	NaN	NaN	0	62,768	33	10	61	10	386	42,9	5,3	6261,49	75,04	8	10	P54687	Branched-chain-amino-acid aminotransferase, cytosolic OS=Homo sapiens OX=9606 GN=BCAT1 PE=1 SV=3	0	Pf01063	586	ENSG00000060982	BCAT1	B3KY27;B7Z2M5;B7Z5L0;F5H5E4;hsa:586;P54687;Q68DQ7;Q96MY9
2952060	1269660	2373830	2259620	2310420	130824	FALSE		-5,46E+18	NaN	NaN	NaN	0	62,643	10	12	66	12	1599	175,4	5,33	7174,84	65,95	9	12	Q04637	Eukaryotic translation initiation factor 4 gamma 1 OS=Homo sapiens OX=9606 GN=EIF4G1 PE=1 SV=4	0	Pf02020, Pf02847, Pf02854	1981	ENSG00000114867	EIF4G1	D3DNT2;D3DNT4;D3DNT5;E9PFM1;G5E9S1;hsa:1981;O43177;O95066;Q04637;Q5HYG0;Q6ZN21;Q8N102
2118170	1300090	2568110	1467930	1096730	282784	FALSE		-5,98E+18	NaN	NaN	NaN	0	62,586	18	19	43	19	1388	160,8	6,02	4097,68	26,94	15	18	O75116	Rho-associated protein kinase 2 OS=Homo sapiens OX=9606 GN=ROCK2 PE=1 SV=4	0	Pf00069, Pf08912	9475	ENSG00000134318	ROCK2	hsa:9475;O75116;Q53QZ0;Q53SJ7;Q9UQN5
1628640	1012510	3422740	NaN	19151,4	NaN	FALSE		7,34E+18	NaN	NaN	NaN	0	62,57	36	11	37	11	494	55	7,12	4124,27	51,47	7	11	O60701	UDP-glucose 6-dehydrogenase OS=Homo sapiens OX=9606 GN=UGDH PE=1 SV=1	0	Pf00984, Pf03720, Pf03721	7358	ENSG00000109814	UGDH	B3KUU2;B4DN25;hsa:7358;O60589;O60701
2340260	367135	2512210	2615420	2337950	95213	FALSE		4,8E+17	NaN	NaN	NaN	0	62,501	45	10	60	7	356	37,5	7,09	5082,29	77,44	6	10	Q15365	Poly(rC)-binding protein 1 OS=Homo sapiens OX=9606 GN=PCBP1 PE=1 SV=2	3	Pf00013	5093	ENSG00000169564	PCBP1	hsa:5093;Q13157;Q14975;Q15365
2808760	2938460	6105680	NaN	2742,47	215266	FALSE		7,22E+18	NaN	NaN	NaN	0	62,495	17	10	32	9	860	95,3	5,05	3172,09	59,36	7	10	P01130	Low-density lipoprotein receptor OS=Homo sapiens OX=9606 GN=LDLR PE=1 SV=1	1	Pf00057, Pf00058, Pf14670	3949	ENSG00000130164	LDLR	B4DII3;B4DJZ8;B4DR00;B4DTQ3;C0JYY8;H0YLU8;H0YNT7;hsa:3949;P01130;Q53ZD9;Q59FQ1;Q9UDH7
508410	1756950	728061	16219600	22919600	3478260	FALSE		6,42E+18	NaN	NaN	NaN	0	62,465	47	7	60	7	188	21,2	6,01	5197,88	104,31	6	7	O95445	Apolipoprotein M OS=Homo sapiens OX=9606 GN=APOM PE=1 SV=2	0	Pf11032	55937	ENSG00000204444;ENSG00000206409;ENSG00000224290;ENSG00000226215;ENSG00000227567;ENSG00000231974;ENSG00000235754	APOM	B0UX98;hsa:55937;O95445;Q5SRP4;Q9P046;Q9UMP6
4294590	1407380	8423240	954506	218778	NaN	FALSE		-7,23E+18	NaN	NaN	NaN	0	62,415	19	13	54	13	917	102,4	6,8	5379,89	60,63	11	13	P19367	Hexokinase-1 OS=Homo sapiens OX=9606 GN=HK1 PE=1 SV=3	0	Pf00349, Pf03727	3098	ENSG00000156515	HK1	E9PCK0;hsa:3098;O43443;O43444;O75574;P19367;Q5VTC3;Q96HC8;Q9NNZ4;Q9NNZ5
2786070	2321890	5774090	248435	427403	323884	FALSE		7,06E+18	NaN	NaN	NaN	0	62,411	51	12	73	11	320	35,9	5,05	6077,77	59,01	9	12	P08758	Annexin A5 OS=Homo sapiens OX=9606 GN=ANXA5 PE=1 SV=2	1	Pf00191	308	ENSG00000164111	ANXA5	D3DNW7;hsa:308;P08758;Q6FHB3;Q6FI16;Q8WV69;Q9UDH9
3426910	2491630	4420720	2342070	2143690	26853,2	FALSE		1,67E+18	NaN	NaN	NaN	0	62,251	53	10	72	10	271	31,3	4,94	6242,63	82,09	7	9	Q96FW1	Ubiquitin thioesterase OTUB1 OS=Homo sapiens OX=9606 GN=OTUB1 PE=1 SV=2	0	Pf10275	55611	ENSG00000167770	OTUB1	hsa:55611;Q32Q78;Q96FW1;Q96II3;Q9NXQ4;Q9P0B8
1158610	1572880	1299440	1860750	500455	12427500	TRUE		-9,22E+18	NaN	NaN	NaN	0	61,89	54	9	600	5	142	15,2	8,44	62153,4	755,94	5	9	P01966	SWISS-PROT:P01966 (Bos taurus) Hemoglobin subunit alpha	0	Pf00042	100140149;512439	ENSBTAG00000051412	HBA	A3KN13;bta:100140149;bta:512439;P01966;Q3SZE0;Q9TTR9;Q9TTS0;Q9TTS1
474327	1546980	453641	NaN	38031,4	NaN	TRUE		7,8E+17	NaN	NaN	NaN	0	61,864	13	12	110	3	946	106,1	7,94	10277,4	90,82	11	12	Q9TRI1	TREMBL:Q9TRI1 (Bos taurus) similar to inter-alpha-trypsin inhibitor heavy chain2	0	Pf00092, Pf06668, Pf08487	512164	ENSBTAG00000014075	ITIH2	A5D7R6;bta:512164;F1MNW4
3159120	7280290	3282810	170845	379321	72894,4	FALSE		-4,48E+18	NaN	NaN	NaN	0	61,699	34	12	41	12	253	29,8	9,06	2436,73	68,95	7	12	O75937	DnaJ homolog subfamily C member 8 OS=Homo sapiens OX=9606 GN=DNAJC8 PE=1 SV=2	0	Pf00226	22826	ENSG00000126698;ENSG00000285317	DNAJC8	B4DUU4;D3DPM0;hsa:22826;O75937;Q6IBA4;Q8N4Z5;Q9P051;Q9P067
2522390	963851	3326050	151134	168529	NaN	FALSE		5,13E+17	NaN	NaN	NaN	0	61,638	8	12	43	12	2491	274,2	5,94	3125,78	34,55	7	12	P11717	Cation-independent mannose-6-phosphate receptor OS=Homo sapiens OX=9606 GN=IGF2R PE=1 SV=3	0	Pf00040, Pf00878	3482	ENSG00000197081	IGF2R	hsa:3482;P11717;Q7Z7G9;Q96PT5
1733740	2133440	4727940	67638,3	NaN	23419,4	FALSE		8,35E+18	NaN	NaN	NaN	0	61,62	32	9	30	9	401	44,8	6,09	2929,76	49,04	6	9	Q8WVQ1	Soluble calcium-activated nucleotidase 1 OS=Homo sapiens OX=9606 GN=CANT1 PE=1 SV=1	0	Pf06079	124583	ENSG00000171302	CANT1	B4DJ54;hsa:124583;Q7Z2J7;Q8NG05;Q8NHP0;Q8WVQ1;Q9BSD5
4622720	1957680	4552240	2059080	2418990	16587,7	FALSE	Acetyl [N-Term];Met-loss+Acetyl [N-Term]	9,16E+18	NaN	NaN	NaN	0	61,439	73	8	40	6	142	16,7	5,29	3736,08	78,5	5	7	P60983	Glia maturation factor beta OS=Homo sapiens OX=9606 GN=GMFB PE=1 SV=2	2	Pf00241	2764	ENSG00000197045	GMFB	B2R499;hsa:2764;P17774;P60983;Q9BS35
3150790	984031	4877190	16004900	57299000	1666210	FALSE		-9,16E+17	NaN	NaN	NaN	0	61,392	34	7	99	7	253	26,7	8,63	9922,35	150,4	6	7	P02746	Complement C1q subcomponent subunit B OS=Homo sapiens OX=9606 GN=C1QB PE=1 SV=3	0	Pf00386, Pf01391	713		C1QB	hsa:713;P02746;Q5T959;Q96H17
3110690	3105640	3187790	105878	93840,9	8821,9	FALSE		-6,59E+18	NaN	NaN	NaN	0	61,364	43	11	44	11	396	44,7	7,81	4000,49	76,19	7	11	Q9NTK5	Obg-like ATPase 1 OS=Homo sapiens OX=9606 GN=OLA1 PE=1 SV=2	0	Pf01926, Pf06071	29789	ENSG00000138430	OLA1	D7EHM2;hsa:29789;Q5BJD7;Q8NCI8;Q96CU1;Q96SV2;Q9NTK5;Q9P1D3;Q9UNY9;Q9Y6G4
1401190	1698980	2767520	30467,5	47251,6	7444,42	FALSE		-7,97E+17	NaN	NaN	NaN	0	61,203	39	13	52	13	499	55,7	5,62	4632,32	28,3	11	13	P15170	Eukaryotic peptide chain release factor GTP-binding subunit ERF3A OS=Homo sapiens OX=9606 GN=GSPT1 PE=1 SV=1	0	Pf00009, Pf03143, Pf03144	2935	ENSG00000103342	GSPT1	hsa:2935;J3KQG6;P15170;Q96GF2
90883600	3527390	107270000	78189400	65905400	4887530	FALSE	Acetyl [N-Term];Met-loss [N-Term];Met-loss+Acetyl [N-Term]	3,41E+18	NaN	NaN	NaN	0	61,179	52	7	140	7	90	10,2	5,48	13537	134,73	6	6	P06703	Protein S100-A6 OS=Homo sapiens OX=9606 GN=S100A6 PE=1 SV=1	0	Pf01023	6277	ENSG00000197956	S100A6	D3DV39;hsa:6277;P06703;Q5RHS4
4301710	1489430	3767880	692480	302682	91649,7	FALSE		-1,34E+18	NaN	NaN	NaN	0	60,917	42	13	62	13	425	47	7,23	6357,45	73,49	9	13	P22234	Bifunctional phosphoribosylaminoimidazole carboxylase/phosphoribosylaminoimidazole succinocarboxamide synthetase OS=Homo sapiens OX=9606 GN=PAICS PE=1 SV=3	0	Pf00731, Pf01259	10606	ENSG00000128050	PAICS	E9PDH9;hsa:10606;P22234;Q68CQ5
10967800	262283	9759420	1764940	2558900	5555,76	FALSE	Acetyl [N-Term]	7,73E+18	NaN	NaN	NaN	0	60,789	9	6	36	6	1192	129,9	4,5	2362,11	80,25	2	6	Q9NQC3	Reticulon-4 OS=Homo sapiens OX=9606 GN=RTN4 PE=1 SV=2	0	Pf02453	57142	ENSG00000115310	RTN4	hsa:57142;O94962;Q7L7Q5;Q7L7Q6;Q7L7Q8;Q8IUA4;Q96B16;Q9BXG5;Q9H212;Q9H3I3;Q9NQC3;Q9UQ42;Q9Y293;Q9Y2Y7;Q9Y5U6
4648040	5577090	5427170	39943,8	383942	NaN	TRUE		6,47E+18	NaN	NaN	NaN	0	60,718	29	8	45	8	387	42,6	5,77	3775,49	82,06	7	8	Q58D62	SWISS-PROT:Q58D62 (Bos taurus) Fetuin-B precursor	0	Pf00031	504615	ENSBTAG00000017531	FETUB	bta:504615;Q58D62
NaN	NaN	NaN	NaN	NaN	NaN	FALSE		4,01E+18	NaN	NaN	NaN	0	60,587	20	8	282	1	376	42	5,59	34020,9	247,66	7	8	Q562R1	Beta-actin-like protein 2 OS=Homo sapiens OX=9606 GN=ACTBL2 PE=1 SV=2	0	Pf00022	345651	ENSG00000169067	ACTBL2	B2RPJ1;hsa:345651;Q562R1;Q562R2;Q562S9;Q562X8
1194290	2777030	2079590	229847	203193	125267	FALSE		-7,79E+18	NaN	NaN	NaN	0	60,276	40	11	54	11	439	49,2	5,24	6848,88	64,75	8	11	P17980	26S proteasome regulatory subunit 6A OS=Homo sapiens OX=9606 GN=PSMC3 PE=1 SV=3	0	Pf00004, Pf16450, Pf17862	5702	ENSG00000165916	PSMC3	B2R8V1;hsa:5702;P17980;Q3B757;Q3B865;Q53HU5;Q6GPG8;Q6IBS1;Q96HD3
2045420	427151	4757680	24248,1	17021,1	NaN	FALSE		-2,68E+18	NaN	NaN	NaN	0	60,222	25	11	31	10	751	85,2	8,69	3058,65	28,7	7	11	Q99985	Semaphorin-3C OS=Homo sapiens OX=9606 GN=SEMA3C PE=2 SV=2	1	Pf01403, Pf07679	10512	ENSG00000075223	SEMA3C	B4DRL8;hsa:10512;Q99985
228809	12431,2	221751	1286410	3534570	2923,73	FALSE		2,58E+18	NaN	NaN	NaN	0	60,166	24	11	38	11	655	70,6	7,24	3119,04	41,95	8	11	Q04756	Hepatocyte growth factor activator OS=Homo sapiens OX=9606 GN=HGFAC PE=1 SV=1	0	Pf00008, Pf00040, Pf00051, Pf00089	3083	ENSG00000109758	HGFAC	hsa:3083;Q04756;Q14726;Q2M1W7;Q53X47
106951	NaN	171116	3622,17	2726230	1146740	FALSE		-4,62E+17	NaN	NaN	NaN	0	60,072	35	13	33	13	466	51,6	6,96	1961,46	29,74	9	13	Q13231	Chitotriosidase-1 OS=Homo sapiens OX=9606 GN=CHIT1 PE=1 SV=1	0	Pf00704, Pf01607	1118	ENSG00000133063	CHIT1	B3KNW6;hsa:1118;J3KN09;Q0VGG5;Q0VGG6;Q13231;Q3ZAR1;Q6ISC2;Q9H3V8;Q9UDJ8
NaN	NaN	NaN	4418940	3679020	NaN	FALSE		-6,48E+18	NaN	NaN	NaN	0	59,985	14	8	44	8	1037	110,6	6,81	3209,32	91,09	4	8	Q5VY43	Platelet endothelial aggregation receptor 1 OS=Homo sapiens OX=9606 GN=PEAR1 PE=1 SV=1	0	Pf00053	375033	ENSG00000187800	PEAR1	hsa:375033;Q5VY43;Q8TEK2
3719340	4535580	3540310	24258200	29031400	4814020	FALSE		-2,58E+18	NaN	NaN	NaN	0	59,872	32	7	119	7	189	21,3	5,15	14126,1	155,02	7	7	P05090	Apolipoprotein D OS=Homo sapiens OX=9606 GN=APOD PE=1 SV=1	0	Pf00061	347	ENSG00000189058	APOD	B2R579;D3DNW6;hsa:347;P05090;Q6IBG6
661449	9672020	736918	138086	65825,9	NaN	FALSE		4,34E+18	NaN	NaN	NaN	0	59,473	76	7	29	7	125	13,8	6,07	2630,67	35,88	6	7	Q9NRX4	14 kDa phosphohistidine phosphatase OS=Homo sapiens OX=9606 GN=PHPT1 PE=1 SV=1	0	Pf05005	29085	ENSG00000054148	PHPT1	B1AMX0;B1AMX1;hsa:29085;Q9H0Y3;Q9NRX4
3648110	1453100	3906440	4549020	4215680	173212	FALSE		-9,2E+16	NaN	NaN	NaN	0	59,398	55	9	49	9	218	24,6	6,68	4362,45	75,47	7	9	P00492	Hypoxanthine-guanine phosphoribosyltransferase OS=Homo sapiens OX=9606 GN=HPRT1 PE=1 SV=2	0	Pf00156	3251	ENSG00000165704	HPRT1	A6NHF0;B2R8M9;hsa:3251;P00492
2863520	3961980	3134510	332379	204230	203517	FALSE	Met-loss+Acetyl [N-Term]	-7,18E+18	NaN	NaN	NaN	0	59,248	49	11	46	11	321	35,9	6,6	4328,92	75,32	8	11	Q13630	GDP-L-fucose synthase OS=Homo sapiens OX=9606 GN=GFUS PE=1 SV=1	0	Pf01370	7264	ENSG00000104522;ENSG00000278243	GFUS	B2R8Y7;D3DWK5;hsa:7264;Q13630;Q567Q9;Q9UDG7
2284420	2021430	3575740	4111020	2902450	458081	FALSE	Acetyl [N-Term];Met-loss+Acetyl [N-Term]	-6,63E+18	NaN	NaN	NaN	0	59,127	18	15	68	15	963	109,6	6,51	5655,18	46,74	11	14	P33176	Kinesin-1 heavy chain OS=Homo sapiens OX=9606 GN=KIF5B PE=1 SV=1	0	Pf00225	3799	ENSG00000170759	KIF5B	A0AVB2;hsa:3799;P33176;Q5VZ85
8181100	715214	19140000	1151020	1235050	129030	FALSE		-8,58E+18	NaN	NaN	NaN	0	59,083	19	11	49	10	763	86,9	4,79	6275,27	46,58	9	11	Q06481	Amyloid beta precursor like protein 2 OS=Homo sapiens OX=9606 GN=APLP2 PE=1 SV=2	0	Pf00014, Pf02177, Pf10515, Pf12924, Pf12925	334	ENSG00000084234	APLP2	B3KXX9;H7BXI4;hsa:334;Q06481;Q13861;Q14594;Q14662;Q71U10;Q7M4L3;Q9BT36
4655120	6469160	10432500	NaN	NaN	74359,8	FALSE		8,65E+18	NaN	NaN	NaN	0	58,953	33	5	43	5	183	20,8	4,97	5541,01	66,57	4	5	P55001	Microfibrillar-associated protein 2 OS=Homo sapiens OX=9606 GN=MFAP2 PE=1 SV=1	0	Pf01549, Pf05507	4237	ENSG00000117122	MFAP2	hsa:4237;P55001;Q53X60;Q5JXY0
1357460	4419850	5546890	NaN	NaN	NaN	FALSE		-3,4E+18	NaN	NaN	NaN	0	58,914	42	11	27	11	383	43	9,42	1495,98	52,98	5	11	O95084	Serine protease 23 OS=Homo sapiens OX=9606 GN=PRSS23 PE=1 SV=1	0	Pf00089	11098	ENSG00000150687	PRSS23	B2RDJ1;B4E2J3;hsa:11098;O95084;Q6IBI0
2977790	1342620	4998040	6502480	4257820	4865,01	FALSE		-5,63E+18	NaN	NaN	NaN	0	58,86	56	11	74	11	227	24,6	7,21	8093,9	79,14	10	11	P22061	Protein-L-isoaspartate(D-aspartate) O-methyltransferase OS=Homo sapiens OX=9606 GN=PCMT1 PE=1 SV=4	0	Pf01135	5110	ENSG00000120265	PCMT1	A8K109;hsa:5110;J3KP72;P22061;Q14661;Q16556;Q5VYC1;Q5VYC2;Q93061;Q96II9;Q99625;Q9BQV7;Q9BQV8;Q9NP03
2448270	1412780	4729850	NaN	NaN	NaN	FALSE		-9,17E+18	NaN	NaN	NaN	0	58,792	13	11	39	11	1347	149,9	6,65	5069,65	57,21	9	11	O94856	Neurofascin OS=Homo sapiens OX=9606 GN=NFASC PE=1 SV=4	0	Pf00041, Pf00047, Pf07679, Pf13882, Pf13927	23114	ENSG00000163531	NFASC	B2RNN8;B3KQZ1;B5MDP6;B5MDR6;B7ZMD8;hsa:23114;O94856;Q149P5;Q5T2F0;Q5T2F1;Q5T2F2;Q5T2F3;Q5T2F4;Q5T2F5;Q5T2F6;Q5T2F7;Q5T2F9;Q5T2G0;Q5W9F8;Q68DH3;Q6ZQV6;Q7Z3K1;Q96HT1;Q96K50
4471190	264971	4252630	1136320	457602	33478,5	FALSE		5,99E+18	NaN	NaN	NaN	0	58,785	41	6	36	6	179	19,1	5,5	3998,67	75,38	5	6	O60888	Protein CutA OS=Homo sapiens OX=9606 GN=CUTA PE=1 SV=2	0	Pf03091	51596	ENSG00000112514;ENSG00000226492	CUTA	A2AB26;A2BEL4;hsa:51596;O60888;Q3B784;Q5JXM9;Q5SU05;Q9NYQ9
3449650	3839960	4139060	50575,2	246937	312269	FALSE	Met-loss+Acetyl [N-Term]	-4,48E+18	NaN	NaN	NaN	0	58,782	72	8	31	8	174	19,9	5,72	2599,34	71,99	4	8	Q9Y5S9	RNA-binding protein 8A OS=Homo sapiens OX=9606 GN=RBM8A PE=1 SV=1	0	Pf00076	9939	ENSG00000265241	RBM8A	B3KQI9;hsa:9939;Q6FHD1;Q6IQ40;Q9GZX8;Q9NZI4;Q9Y5S9
117895	232707	182722	NaN	3873,46	4270,23	FALSE		-2,09E+18	NaN	NaN	NaN	0	58,708	18	8	50	2	644	70,7	9,26	4817,2	98,05	7	8	Q13310	Polyadenylate-binding protein 4 OS=Homo sapiens OX=9606 GN=PABPC4 PE=1 SV=1	0	Pf00076, Pf00658	8761	ENSG00000090621	PABPC4	B1ANQ8;hsa:8761;Q13310;Q4VC03;Q6P0N3
7082830	489727	14922200	2892280	988583	NaN	FALSE		8,13E+17	NaN	NaN	NaN	0	58,563	10	12	40	12	1621	177,3	4,36	4246,79	35,93	10	12	P48681	Nestin OS=Homo sapiens OX=9606 GN=NES PE=1 SV=2	0	Pf00038	10763	ENSG00000132688	NES	hsa:10763;O00552;P48681;Q3LIF5;Q5SYZ6
342033	1887060	614824	4374830	508804	271079	TRUE		-7,27E+18	NaN	NaN	NaN	0	58,338	50	8	134	5	201	22	9,39	13669,8	138,58	8	8	Q3SX09	TREMBL:Q3SX09 (Bos taurus) similar to HBG protein	1
NaN	89247,1	NaN	NaN	NaN	1224590	TRUE		5,82E+18	NaN	NaN	NaN	0	58,31	16	13	398	2	495	56,4	8,22	30468,6	526,57	11	13	P02676	SWISS-PROT:P02676 (Bos taurus) similar to Fibrinogen beta chain precursor	0	Pf00147, Pf08702		ENSBIXG00005027692	FGB	A0A4W2II28
3986200	2067980	3541050	70261	98795	15127,3	FALSE		-5,16E+18	NaN	NaN	NaN	0	58,279	24	11	31	11	709	78,3	5,25	2596,92	54,85	7	11	Q14444	Caprin-1 OS=Homo sapiens OX=9606 GN=CAPRIN1 PE=1 SV=2	0	Pf12287, Pf18293	4076	ENSG00000135387	CAPRIN1	A6NMY7;D3DR06;hsa:4076;Q14444;Q15074;Q6IMN4;Q6IMN7;Q9BV09
6801000	1066810	5586980	70716,4	143519	57183	FALSE		-6,49E+18	NaN	NaN	NaN	0	58,089	28	7	56	7	466	52,1	5,52	5043,9	78,25	4	7	Q13283	Ras GTPase-activating protein-binding protein 1 OS=Homo sapiens OX=9606 GN=G3BP1 PE=1 SV=1	0	Pf00076, Pf02136	10146	ENSG00000145907	G3BP1	hsa:10146;Q13283;Q5HYE9
4454770	7071230	5568330	423646	536959	NaN	FALSE		6,09E+18	NaN	NaN	NaN	0	58,032	43	8	47	8	181	20,6	8,87	5863,85	53,23	8	8	Q13442	28 kDa heat- and acid-stable phosphoprotein OS=Homo sapiens OX=9606 GN=PDAP1 PE=1 SV=1	0	Pf10252	11333	ENSG00000106244	PDAP1	D6W5S5;hsa:11333;Q13442;Q92906
4194580	756007	3857730	5860140	3751180	882001	FALSE		9,03E+18	NaN	NaN	NaN	0	57,977	59	9	58	9	188	21	5,14	3959,32	96,55	7	9	O75223	Gamma-glutamylcyclotransferase OS=Homo sapiens OX=9606 GN=GGCT PE=1 SV=1	0	Pf13772	79017	ENSG00000006625	GGCT	B2RDN0;B8ZZN4;B8ZZR8;hsa:79017;O75223;Q9BS37
5859740	4362290	13436200	17034,3	74431	NaN	FALSE		5,01E+17	NaN	NaN	NaN	0	57,938	36	9	53	3	324	35,9	9,88	5110,39	63,48	8	9	P67809	Y-box-binding protein 1 OS=Homo sapiens OX=9606 GN=YBX1 PE=1 SV=3	6	Pf00313	4904	ENSG00000065978	YBX1	hsa:4904;P16990;P16991;P67809;Q14972;Q15325;Q5FVF0
3389130	943166	4474380	150109	NaN	NaN	FALSE		-8,22E+18	NaN	NaN	NaN	0	57,883	13	8	31	3	915	102,6	5,47	2022,55	77,44	4	8	Q15424	Scaffold attachment factor B1 OS=Homo sapiens OX=9606 GN=SAFB PE=1 SV=4	5	Pf00076, Pf02037	6294	ENSG00000160633	SAFB	A0AV56;B7Z5B6;B7ZLP6;F5H0H3;hsa:6294;O60406;Q15424;Q59HH8
5501630	2926870	5076460	692664	168501	9692,65	FALSE		6,53E+18	NaN	NaN	NaN	0	57,799	46	8	32	7	425	47,6	4,89	2682,11	71,11	3	8	Q09028	Histone-binding protein RBBP4 OS=Homo sapiens OX=9606 GN=RBBP4 PE=1 SV=3	1	Pf00400, Pf12265	5928	ENSG00000162521	RBBP4	B2R6G9;B4DRH0;D3DPQ3;hsa:5928;P31149;Q09028;Q53H02;Q96BV9
1953000	873031	3308660	1160420	755999	62974,9	FALSE	Acetyl [N-Term];Met-loss+Acetyl [N-Term]	1,35E+18	NaN	NaN	NaN	0	57,713	37	13	42	13	437	49	5,71	4337,34	47,28	8	12	P62495	Eukaryotic peptide chain release factor subunit 1 OS=Homo sapiens OX=9606 GN=ETF1 PE=1 SV=3	0	Pf03463, Pf03464, Pf03465	2107	ENSG00000120705	ETF1	B2R6B4;D3DQC1;hsa:2107;P46055;P62495;Q5M7Z7;Q96CG1
11674300	2872410	13923200	510845	634603	59546,2	FALSE		-8,2E+18	NaN	NaN	NaN	0	57,604	58	8	41	8	165	17,8	9,42	6221,07	70,16	7	8	P30050	60S ribosomal protein L12 OS=Homo sapiens OX=9606 GN=RPL12 PE=1 SV=1	0	Pf00298, Pf03946	6136	ENSG00000197958	RPL12	hsa:6136;P30050;Q5VVV2;Q6PB27
1107150	1515300	1681200	1818450	3256780	707941	FALSE	Acetyl [N-Term]	7,06E+18	NaN	NaN	NaN	0	57,481	74	11	74	6	201	22,2	5,73	7009,15	84,7	9	11	Q9H0U4	Ras-related protein Rab-1B OS=Homo sapiens OX=9606 GN=RAB1B PE=1 SV=1	5	Pf00071	81876	ENSG00000174903	RAB1B	A8K7S1;hsa:81876;Q9H0U4
4674130	12598000	6898790	NaN	10947,4	171608	FALSE	Acetyl [N-Term];Met-loss+Acetyl [N-Term]	-8,98E+18	NaN	NaN	NaN	0	57,393	54	8	37	8	177	19,5	7,71	4471,21	50,06	6	7	P62633	CCHC-type zinc finger nucleic acid binding protein OS=Homo sapiens OX=9606 GN=CNBP PE=1 SV=1	0	Pf00098	7555	ENSG00000169714	CNBP	A8K7V4;B2RAV9;B4DP17;D3DNB9;D3DNC0;D3DNC1;E9PDR7;hsa:7555;P20694;P62633;Q4JGY0;Q4JGY1;Q5QJR0;Q5U0E9;Q6PJI7;Q96NV3
1884700	4613480	2142660	220248	305256	381158	FALSE		-5,62E+18	NaN	NaN	NaN	0	57,321	27	8	42	8	552	62	8,31	2408,22	56,03	4	8	P15586	N-acetylglucosamine-6-sulfatase OS=Homo sapiens OX=9606 GN=GNS PE=1 SV=3	0	Pf00884	2799	ENSG00000135677	GNS	B4DYH8;hsa:2799;P15586;Q53F05
2562790	2386800	2674450	1636140	1018730	143411	FALSE		-1,17E+18	NaN	NaN	NaN	0	57,132	43	12	68	9	360	41,4	6,98	6612,43	60,77	10	12	P28482	Mitogen-activated protein kinase 1 OS=Homo sapiens OX=9606 GN=MAPK1 PE=1 SV=3	3	Pf00069	5594	ENSG00000100030	MAPK1	A8CZ64;hsa:5594;P28482
758201	509092	740889	16399100	12841600	5007450	FALSE	Met-loss [N-Term]	4,03E+18	NaN	NaN	NaN	0	57,111	31	12	78	12	359	41,2	4,69	7052,6	109,16	9	11	O75563	Src kinase-associated phosphoprotein 2 OS=Homo sapiens OX=9606 GN=SKAP2 PE=1 SV=1	0	Pf00018, Pf00169	8935	ENSG00000005020	SKAP2	A4D173;hsa:8935;O75563;Q53GP6;Q75MK6;Q75MZ4;Q9UBZ3;Q9UED8
12429100	186373	39724200	1113590	527178	NaN	FALSE		-3,74E+18	NaN	NaN	NaN	0	57,094	22	7	57	7	323	35,7	5,16	8428,19	86,65	7	7	Q9Y240	C-type lectin domain family 11 member A OS=Homo sapiens OX=9606 GN=CLEC11A PE=1 SV=1	0	Pf00059	6320	ENSG00000105472	CLEC11A	B2RAD4;hsa:6320;Q9Y240
2670380	4199300	3633500	25672,3	102525	11255,9	FALSE	Acetyl [N-Term];Met-loss+Acetyl [N-Term]	-3,97E+18	NaN	NaN	NaN	0	56,953	26	10	40	10	427	47,7	11,06	3976,66	41,92	7	9	P36578	60S ribosomal protein L4 OS=Homo sapiens OX=9606 GN=RPL4 PE=1 SV=5	0	Pf00573, Pf14374	6124	ENSG00000174444	RPL4	A8K502;hsa:6124;P36578;P39029;Q4VBR0;Q969Z9
3506670	1589270	1346820	141318	64533,2	63584,4	FALSE		-8,78E+18	NaN	NaN	NaN	0	56,413	43	8	54	8	329	35,8	8,29	6317,83	74,9	6	8	Q14914	Prostaglandin reductase 1 OS=Homo sapiens OX=9606 GN=PTGR1 PE=1 SV=2	0	Pf00107, Pf16884	22949	ENSG00000106853	PTGR1	A8K0N2;B4DPK3;F5GY50;hsa:22949;Q14914;Q8IYQ0;Q9H1X6
3588960	1861070	2503720	16437300	12596200	3211630	FALSE	Acetyl [N-Term]	-8,94E+18	NaN	NaN	NaN	0	56,345	81	5	68	5	81	9,1	6,29	10616	97,68	3	5	Q9P1F3	Costars family protein ABRACL OS=Homo sapiens OX=9606 GN=ABRACL PE=1 SV=1	0	Pf14705	58527	ENSG00000146386	ABRACL	hsa:58527;Q5SZC8;Q9P0A1;Q9P1F3
2070070	1267320	3713610	179668	87807,7	20903,1	FALSE		-9,39E+16	NaN	NaN	NaN	0	56,293	20	11	50	11	740	82,4	7,23	5720,06	56,74	10	11	Q92499	ATP-dependent RNA helicase DDX1 OS=Homo sapiens OX=9606 GN=DDX1 PE=1 SV=2	0	Pf00270, Pf00271, Pf00622	1653	ENSG00000079785	DDX1	B4DME8;B4DPN6;hsa:1653;Q92499
63962,3	6020,92	32820,1	19534900	23283300	21932200	FALSE		-5,67E+17	NaN	NaN	NaN	0	56,288	59	7	88	7	114	13,2	6,13	11148,6	100,72	6	7	P06702	Protein S100-A9 OS=Homo sapiens OX=9606 GN=S100A9 PE=1 SV=1	0	Pf01023	6280	ENSG00000163220	S100A9	D3DV36;hsa:6280;P06702;Q6FGA1;Q9NYM0;Q9UCJ1
5644960	7543760	6372340	65917	83134,5	228870	FALSE		6,88E+18	NaN	NaN	NaN	0	56,264	30	10	40	10	344	37,9	7,81	3641,76	48,05	8	10	Q9P121	Neurotrimin OS=Homo sapiens OX=9606 GN=NTM PE=1 SV=1	0	Pf07679, Pf13927	50863	ENSG00000182667	NTM	A0MTT2;hsa:50863;Q6UXJ3;Q86VJ9;Q9P121
4358280	3741190	5592200	1287340	522674	596932	FALSE		-6,77E+18	NaN	NaN	NaN	0	56,263	55	10	58	10	205	22,9	6,55	6741,19	96,3	7	10	P49720	Proteasome subunit beta type-3 OS=Homo sapiens OX=9606 GN=PSMB3 PE=1 SV=2	0	Pf00227	5691	ENSG00000275903;ENSG00000277791	PSMB3	hsa:5691;P31147;P49720;Q0P6J7;Q96E27
990772	2813550	1342820	NaN	84079,6	18580,5	FALSE		-6,54E+18	NaN	NaN	NaN	0	56,249	21	9	28	9	471	51,9	5,76	3459,07	42,7	8	9	P48723	Heat shock 70 kDa protein 13 OS=Homo sapiens OX=9606 GN=HSPA13 PE=1 SV=1	0	Pf00012	6782	ENSG00000155304	HSPA13	B2R616;hsa:6782;P48723;Q8NE40
117483	2392,18	82864,9	6345320	5864490	931136	FALSE		-5,57E+18	NaN	NaN	NaN	0	56,108	49	8	43	8	217	24	5,21	4441,17	55,6	7	8	P28676	Grancalcin OS=Homo sapiens OX=9606 GN=GCA PE=1 SV=2	0		25801	ENSG00000115271	GCA	B2R5X3;hsa:25801;P28676;Q53TB5;Q59EP3
1729060	13851,2	2827130	27825,8	28736,9	NaN	FALSE		-4,58E+18	NaN	NaN	NaN	0	55,912	7	9	32	9	2845	302,9	6,87	2353,53	62,4	3	9	Q7Z7M0	Multiple epidermal growth factor-like domains protein 8 OS=Homo sapiens OX=9606 GN=MEGF8 PE=1 SV=2	0	Pf00053, Pf00431, Pf01437, Pf07645, Pf12947, Pf13415, Pf13418	1954	ENSG00000105429	MEGF8	A8KAY0;hsa:1954;O75097;Q7Z7M0
1604190	762867	2019260	2457610	1225100	285343	FALSE		3,15E+17	NaN	NaN	NaN	0	55,895	43	11	74	11	314	35,5	6,2	7607,43	89,23	8	11	Q9BRF8	Serine/threonine-protein phosphatase CPPED1 OS=Homo sapiens OX=9606 GN=CPPED1 PE=1 SV=3	0	Pf00149	55313	ENSG00000103381	CPPED1	B4DQ68;hsa:55313;Q6MZY9;Q9BRF8;Q9H9M9;Q9NUT6
10107000	2856640	9665530	6037,1	NaN	44140,9	FALSE		7,89E+18	NaN	NaN	NaN	0	55,775	36	12	52	12	390	43,5	5,6	5194,84	63,94	10	12	Q6NZI2	Caveolae-associated protein 1 OS=Homo sapiens OX=9606 GN=CAVIN1 PE=1 SV=1	0	Pf15237	284119	ENSG00000177469	CAVIN1	B2RAW7;hsa:284119;O00535;Q6GMY1;Q6NZI2;Q96H74;Q9BT85;Q9HAP4
1408990	1046160	1165140	3882330	2437620	618287	FALSE		4,2E+18	NaN	NaN	NaN	0	55,772	31	8	60	8	439	50,4	6,29	4371,92	83,09	5	8	Q07960	Rho GTPase-activating protein 1 OS=Homo sapiens OX=9606 GN=ARHGAP1 PE=1 SV=1	0	Pf00620, Pf13716	392	ENSG00000175220	ARHGAP1	D3DQQ6;hsa:392;Q07960
8241080	4043340	8466480	4661710	4054700	1130150	FALSE		2E+18	NaN	NaN	NaN	0	55,673	70	12	88	12	163	18,6	4,54	7690,46	110,09	7	12	P63208	S-phase kinase-associated protein 1 OS=Homo sapiens OX=9606 GN=SKP1 PE=1 SV=2	0	Pf01466, Pf03931	6500	ENSG00000113558	SKP1	D3DQ97;D3DQ98;hsa:6500;P34991;P63208;Q8TAY2
357088	1513680	2044740	25066	NaN	76790,4	FALSE		-7,58E+18	NaN	NaN	NaN	0	55,605	33	10	30	10	568	64,6	8,94	2247,09	43,49	7	10	Q8TB73	Protein NDNF OS=Homo sapiens OX=9606 GN=NDNF PE=1 SV=2	0	Pf10179, Pf19433	79625	ENSG00000173376	NDNF	A8K0Q0;hsa:79625;Q6UWE5;Q8TB73;Q9H5P7
1241600	303132	2373780	24398,4	41920,8	NaN	FALSE		-6,41E+18	NaN	NaN	NaN	0	55,423	8	9	35	9	2068	217,2	6,39	3036,17	44,54	5	9	O00468	Agrin OS=Homo sapiens OX=9606 GN=AGRN PE=1 SV=6	0	Pf00008, Pf00050, Pf00053, Pf00054, Pf01390, Pf03146, Pf07648	375790	ENSG00000188157	AGRN	hsa:375790;O00468;Q5SVA1;Q5SVA2;Q60FE1;Q7KYS8;Q8N4J5;Q96IC1;Q9BTD4
1270750	3308780	1567700	149205	239548	NaN	FALSE		-2,01E+18	NaN	NaN	NaN	0	55,397	59	8	23	8	194	21,6	8,63	2748,93	44,2	7	8	P00568	Adenylate kinase isoenzyme 1 OS=Homo sapiens OX=9606 GN=AK1 PE=1 SV=3	0	Pf00406	203	ENSG00000106992	AK1	hsa:203;P00568;Q9BVK9;Q9UQC7
11455600	938209	16285700	126025	NaN	NaN	FALSE		-8,13E+18	NaN	NaN	NaN	0	55,378	43	8	47	8	263	28,5	6,92	5305,07	79,2	6	8	P28074	Proteasome subunit beta type-5 OS=Homo sapiens OX=9606 GN=PSMB5 PE=1 SV=3	0	Pf00227	5693	ENSG00000100804	PSMB5	B2R4N9;B4DUM9;D3DS43;E9PAV2;hsa:5693;P28074;Q16242;Q6PEW2;Q7Z3B5;Q86T01;Q9TNN9
907171	2308080	1385200	1603850	7572340	724287	FALSE		-6,62E+18	NaN	NaN	NaN	0	55,317	24	11	50	11	488	54,7	5,94	5527,24	60,9	9	11	P00742	Coagulation factor X OS=Homo sapiens OX=9606 GN=F10 PE=1 SV=2	0	Pf00008, Pf00089, Pf00594, Pf14670	2159	ENSG00000126218	F10	hsa:2159;P00742;Q14340
3103640	1499310	4667890	26547100	38870900	211622	FALSE		-8,4E+18	NaN	NaN	NaN	0	54,836	46	8	104	8	245	25,8	8,41	9392,47	138,31	5	8	P02747	Complement C1q subcomponent subunit C OS=Homo sapiens OX=9606 GN=C1QC PE=1 SV=3	0	Pf00386, Pf01391	714	ENSG00000159189	C1QC	hsa:714;P02747;Q7Z502;Q96DL2;Q96H05
NaN	NaN	655753	2540300	2370530	169259	FALSE		3,34E+17	NaN	NaN	NaN	0	54,808	73	9	91	7	147	16,1	7,2	9254,86	117,87	8	9	P69892	Hemoglobin subunit gamma-2 OS=Homo sapiens OX=9606 GN=HBG2 PE=1 SV=2	1	Pf00042	3048	ENSG00000196565	HBG2	A8MZE0;hsa:3048;P02096;P62027;P69892;Q14491;Q68NH9;Q96FH6;Q96FH7
2673830	789098	2281750	60541	NaN	14056,5	FALSE		-8,1E+18	NaN	NaN	NaN	0	54,791	29	7	29	6	425	47,8	5,05	2270,71	53,08	4	7	Q16576	Histone-binding protein RBBP7 OS=Homo sapiens OX=9606 GN=RBBP7 PE=1 SV=1	0	Pf00400, Pf12265	5931	ENSG00000102054	RBBP7	hsa:5931;Q16576;Q5JP00
2399,72	15899,8	3177,1	1443660	1003410	418201	FALSE		3,45E+18	NaN	NaN	NaN	0	54,693	16	8	47	8	769	84,7	6,95	4869,2	21,86	8	8	P05107	Integrin beta-2 OS=Homo sapiens OX=9606 GN=ITGB2 PE=1 SV=2	0	Pf00362, Pf07965, Pf08725, Pf17205	3689	ENSG00000160255	ITGB2	B3KTS8;D3DSM1;hsa:3689;P05107;Q16418;Q53HS5;Q9UD72
1378490	1305150	2476720	65599,3	75302,2	3044,16	FALSE		-9,16E+17	NaN	NaN	NaN	0	54,476	15	9	34	9	1071	123,3	6,06	3404,75	47,1	6	8	O14980	Exportin-1 OS=Homo sapiens OX=9606 GN=XPO1 PE=1 SV=1	0	Pf03810, Pf08389, Pf08767, Pf18777, Pf18784, Pf18787	7514	ENSG00000082898	XPO1	A6NL14;A8K1K5;D6W5E2;hsa:7514;O14980;Q63HP8;Q68CP3;Q99433
NaN	101489	NaN	NaN	NaN	NaN	FALSE		-1,38E+18	NaN	NaN	NaN	0	54,261	36	8	46	1	323	37	6,54	5698,05	65,21	7	8	P36873	Serine/threonine-protein phosphatase PP1-gamma catalytic subunit OS=Homo sapiens OX=9606 GN=PPP1CC PE=1 SV=1	0	Pf00149, Pf16891	5501	ENSG00000186298	PPP1CC	hsa:5501;P36873
2054960	4866380	2631210	96709,7	120548	17618,8	FALSE	Met-loss+Acetyl [N-Term]	-1,05E+18	NaN	NaN	NaN	0	54,236	39	13	48	13	494	53,8	5,87	3107,3	26,57	7	12	P49189	4-trimethylaminobutyraldehyde dehydrogenase OS=Homo sapiens OX=9606 GN=ALDH9A1 PE=1 SV=3	0	Pf00171	223	ENSG00000143149	ALDH9A1	B2R6X1;B4DXY7;B9EKV4;hsa:223;P49189;Q5VV90;Q6LCL1;Q9NZT7
2392450	473369	1437190	2374320	1465990	NaN	FALSE		-5,12E+18	NaN	NaN	NaN	0	54,216	14	12	68	12	1272	141,3	5,41	6453,36	50,94	10	12	O60610	Protein diaphanous homolog 1 OS=Homo sapiens OX=9606 GN=DIAPH1 PE=1 SV=2	0	Pf02181, Pf06346, Pf06367, Pf06371	1729	ENSG00000131504	DIAPH1	A6NF18;B7ZKW2;E9PEZ2;hsa:1729;O60610;Q17RN4;Q59FH8;Q9UC76
105810	1295490	NaN	6263400	19393200	4371200	FALSE		1,26E+18	NaN	NaN	NaN	0	54,177	63	6	116	3	117	13,1	8,94	13782,3	153,79	6	6	P01772	Immunoglobulin heavy variable 3-33 OS=Homo sapiens OX=9606 GN=IGHV3-33 PE=1 SV=2	0	Pf07686		ENSG00000211955	IGHV3-33	A0A0B4J1V3;P01771;P01772
1814390	1897470	3186900	NaN	NaN	NaN	FALSE		8,28E+18	NaN	NaN	NaN	0	54,156	25	11	40	11	582	65,9	7,77	4330,77	36,47	7	11	P50281	Matrix metalloproteinase-14 OS=Homo sapiens OX=9606 GN=MMP14 PE=1 SV=3	0	Pf00045, Pf00413, Pf01471, Pf11857	4323	ENSG00000157227	MMP14	A8K5L0;hsa:4323;P50281;Q6GSF3;Q92678
1305330	1017450	1352370	NaN	NaN	NaN	FALSE		4,25E+18	NaN	NaN	NaN	0	54,118	55	10	31	10	330	35,4	7,91	2329,81	41,06	4	10	P50479	PDZ and LIM domain protein 4 OS=Homo sapiens OX=9606 GN=PDLIM4 PE=1 SV=2	0	Pf00412, Pf00595, Pf15936	8572	ENSG00000131435	PDLIM4	B2R8U1;hsa:8572;P50479;Q53Y39;Q96AT8;Q9BTW8;Q9Y292
13015700	19996100	16104600	8263180	4421020	1039240	FALSE		2,75E+18	NaN	NaN	NaN	0	54,072	10	8	81	8	742	81,5	5,33	9554,18	102,82	6	8	P16070	CD44 antigen OS=Homo sapiens OX=9606 GN=CD44 PE=1 SV=3	0	Pf00193	960	ENSG00000026508	CD44	A5YRN9;B6EAT9;D3DR12;D3DR13;hsa:960;O95370;P16070;P22511;Q04858;Q13419;Q13957;Q13958;Q13959;Q13960;Q13961;Q13967;Q13968;Q13980;Q15861;Q16064;Q16065;Q16066;Q16208;Q16522;Q86T72;Q86Z27;Q8N694;Q92493;Q96J24;Q9H5A5;Q9UC28;Q9UC29;Q9UC30;Q9UCB0;Q9UJ36
2512320	5330430	3874800	2128740	3762900	180901	FALSE		-1,68E+18	NaN	NaN	NaN	0	53,974	27	10	69	10	369	41,3	5,27	6117,99	68,73	9	10	P50502	Hsc70-interacting protein OS=Homo sapiens OX=9606 GN=ST13 PE=1 SV=2	0	Pf17830, Pf18253	6767	ENSG00000100380	ST13	hsa:6767;O14999;P50502;Q2TU77
1260900	1150520	1250720	690951	1337440	319988	FALSE		2,42E+18	NaN	NaN	NaN	0	53,695	11	13	71	13	1438	162,1	5,36	6772,73	53,7	12	13	P30622	CAP-Gly domain-containing linker protein 1 OS=Homo sapiens OX=9606 GN=CLIP1 PE=1 SV=2	0	Pf01302, Pf16641	6249	ENSG00000130779	CLIP1	A0AVD3;hsa:6249;P30622;Q17RS4;Q29RG0
3270480	3052580	3593340	799481	748431	77170,9	FALSE		4,01E+18	NaN	NaN	NaN	0	53,667	23	9	51	7	355	38,4	7,81	5872,36	84,28	7	9	Q14103	Heterogeneous nuclear ribonucleoprotein D0 OS=Homo sapiens OX=9606 GN=HNRNPD PE=1 SV=1	2	Pf00076, Pf08143	3184	ENSG00000138668	HNRNPD	A8K9J2;hsa:3184;P07029;Q01858;Q14100;Q14101;Q14102;Q14103;Q4W5A1;Q9UCE8;Q9UCE9
4312910	452660	3695910	4161700	1284560	600235	FALSE	Met-loss+Acetyl [N-Term]	-4,79E+17	NaN	NaN	NaN	0	53,64	35	10	67	10	456	50,1	6,55	7262,5	63,8	8	10	P30520	Adenylosuccinate synthetase isozyme 2 OS=Homo sapiens OX=9606 GN=ADSS2 PE=1 SV=3	0	Pf00709	159	ENSG00000035687	ADSS2	B1AQM5;hsa:159;P30520;Q96EG7
5160410	2880970	3815550	2343940	3666770	188050	FALSE	Met-loss+Acetyl [N-Term]	-5,06E+18	NaN	NaN	NaN	0	53,52	36	10	76	9	249	27,9	8,62	7541,25	90,2	8	10	Q9P0L0	Vesicle-associated membrane protein-associated protein A OS=Homo sapiens OX=9606 GN=VAPA PE=1 SV=3	1	Pf00635	9218	ENSG00000101558	VAPA	A6NDZ0;D3DUI3;hsa:9218;O75453;Q5U0E7;Q9P0L0;Q9UBZ2
3634660	1817580	3014180	420865	545528	NaN	FALSE		-6,01E+18	NaN	NaN	NaN	0	53,374	18	10	52	10	736	81,8	6,81	3093,09	51,8	6	10	O00429	Dynamin-1-like protein OS=Homo sapiens OX=9606 GN=DNM1L PE=1 SV=2	0	Pf00350, Pf01031, Pf02212	10059	ENSG00000087470	DNM1L	A8K4X9;B4DGC9;B4DSU8;G8JLD5;hsa:10059;J3KPI2;O00429;O14541;O60709;Q59GN9;Q7L6B3;Q8TBT7;Q9BWM1;Q9Y5J2
345033	296029	520666	1782020	3303850	117072	FALSE		-1,39E+18	NaN	NaN	NaN	0	53,363	36	13	37	13	507	56,7	5,3	3308,47	24,66	12	13	Q96KN2	Beta-Ala-His dipeptidase OS=Homo sapiens OX=9606 GN=CNDP1 PE=1 SV=5	0	Pf01546, Pf07687	84735	ENSG00000150656	CNDP1	hsa:84735;Q14D40;Q17S05;Q2TBG0;Q6UWK2;Q96KN2;Q9BT98
2961510	4238,32	5396360	NaN	42373	NaN	FALSE		8,98E+18	NaN	NaN	NaN	0	53,331	32	7	39	7	415	47,1	7,2	1236,35	62,42	2	7	O43505	Beta-1,4-glucuronyltransferase 1 OS=Homo sapiens OX=9606 GN=B4GAT1 PE=1 SV=1	0	Pf13896	11041	ENSG00000174684	B4GAT1	hsa:11041;O43505;Q4TTN0
4153200	1050020	7149550	38846,7	129277	5922,65	FALSE	Met-loss [N-Term]	6,1E+18	NaN	NaN	NaN	0	53,284	10	12	52	12	1382	166,5	6,79	6421,67	69	9	11	Q14152	Eukaryotic translation initiation factor 3 subunit A OS=Homo sapiens OX=9606 GN=EIF3A PE=1 SV=1	0	Pf01399	8661	ENSG00000107581	EIF3A	B1AMV5;B4DYS1;F5H335;hsa:8661;O00653;Q14152;Q15778
2609850	1159390	2468050	1925470	2269570	377394	FALSE		-1,02E+18	NaN	NaN	NaN	0	53,144	21	12	67	11	977	107,5	7,03	5401,47	60,73	9	12	O95782	AP-2 complex subunit alpha-1 OS=Homo sapiens OX=9606 GN=AP2A1 PE=1 SV=3	1	Pf01602, Pf02296, Pf02883	160	ENSG00000196961	AP2A1	hsa:160;O95782;Q96CI7;Q96PP6;Q96PP7;Q9H070
2529520	2680270	3077790	97557	12470,3	15774,4	FALSE		-5,32E+18	NaN	NaN	NaN	0	53,076	32	9	32	9	563	60,7	4,68	2472,94	45,76	6	9	Q8IWE2	Protein NOXP20 OS=Homo sapiens OX=9606 GN=FAM114A1 PE=1 SV=2	0	Pf05334	92689	ENSG00000197712	FAM114A1	A8K9W6;hsa:92689;Q6MZV4;Q8IWE2;Q9BVL6
4093060	209741	9324130	1265350	1534230	NaN	FALSE		-7,18E+18	NaN	NaN	NaN	0	52,995	20	9	67	9	493	54,7	7,01	7333,57	81,79	6	9	P55058	Phospholipid transfer protein OS=Homo sapiens OX=9606 GN=PLTP PE=1 SV=1	0	Pf01273, Pf02886	5360	ENSG00000100979	PLTP	A8K006;B4DDD5;B4DRB4;E1P5N8;E7EV16;hsa:5360;P55058;Q8WTT1;Q9BR07;Q9BSH8
1787090	1202470	3008330	4257480	9931760	536214	FALSE		3,39E+18	NaN	NaN	NaN	0	52,981	21	15	72	15	675	80,6	5,33	6021,97	61,61	13	15	Q0ZGT2	Nexilin OS=Homo sapiens OX=9606 GN=NEXN PE=1 SV=1	0	Pf07679	91624	ENSG00000162614	NEXN	A0PJ84;B4DPZ7;hsa:91624;Q0D2H2;Q0ZGT2;Q14CC2;Q14CC3;Q16081;Q7Z2X0;Q96DL0;Q9Y2V1
4267970	89640,3	7336610	2574210	6923510	44908,9	FALSE		4,04E+18	NaN	NaN	NaN	0	52,949	34	9	53	5	365	40,8	6	5883,09	91,44	8	9	P04439	HLA class I histocompatibility antigen, A alpha chain OS=Homo sapiens OX=9606 GN=HLA-A PE=1 SV=2	4	Pf00129, Pf06623, Pf07654	3105	ENSG00000206503	HLA-A	B1PKZ3;hsa:3105;O02939;O02954;O02955;O02963;O19509;O19546;O19598;O19605;O19606;O19619;O19647;O19673;O19687;O19695;O19756;O19794;O19795;O43906;O43907;O46874;O62921;O62924;O77937;O77938;O77964;O78073;O78171;O98009;O98010;O98011;O98137;P01891;P01892;P04439;P05534;P06338;P10313;P10314;P10315;P10316;P13746;P16188;P16189;P16190;P18462;P30443;P30444;P30445;P30446;P30447;P30448;P30449;P30450;P30451;P3045…
3411610	1321560	4114120	607502	711597	28999,2	FALSE	Met-loss+Acetyl [N-Term]	-3,15E+18	NaN	NaN	NaN	0	52,946	67	6	58	6	229	25,6	5,92	2196,87	115,99	1	6	P68402	Platelet-activating factor acetylhydrolase IB subunit alpha2 OS=Homo sapiens OX=9606 GN=PAFAH1B2 PE=1 SV=1	0	Pf13472	5049	ENSG00000168092	PAFAH1B2	A8DPS5;A8DPS6;A8DPS7;E9PEJ5;E9PLP3;hsa:5049;O00687;P68402;Q29459;Q6IBR6
1668870	2268990	2280170	534855	346664	38765,6	FALSE		-8,53E+18	NaN	NaN	NaN	0	52,775	14	14	50	14	1230	136,3	5,78	4566,57	28,43	12	14	Q86VP6	Cullin-associated NEDD8-dissociated protein 1 OS=Homo sapiens OX=9606 GN=CAND1 PE=1 SV=2	0	Pf08623	55832	ENSG00000111530	CAND1	B2RAU3;hsa:55832;O94918;Q6PIY4;Q86VP6;Q8NDJ4;Q96JZ9;Q96T19;Q9BTC4;Q9H0G2;Q9P0H7;Q9UF85
649794	300920	580828	4158230	3403950	NaN	FALSE		-1,85E+18	NaN	NaN	NaN	0	52,751	27	8	65	8	382	42,4	5,36	9645,05	98,02	8	8	P35813	Protein phosphatase 1A OS=Homo sapiens OX=9606 GN=PPM1A PE=1 SV=1	0	Pf00481, Pf07830	5494	ENSG00000100614	PPM1A	B5BU11;hsa:5494;J3KNM0;O75551;P35813
442808	260565	2035670	NaN	NaN	NaN	FALSE		-6,05E+18	NaN	NaN	NaN	0	52,738	13	9	24	9	1686	184	6,2	827,37	28,06	2	9	Q9UKP4	A disintegrin and metalloproteinase with thrombospondin motifs 7 OS=Homo sapiens OX=9606 GN=ADAMTS7 PE=1 SV=2	0	Pf00090, Pf01421, Pf01562, Pf05986, Pf17771, Pf19030, Pf19236	11173	ENSG00000136378	ADAMTS7	hsa:11173;Q14F51;Q6P7J9;Q9UKP4
640001	5257920	1439700	243400	152578	674171	FALSE		1,76E+18	NaN	NaN	NaN	0	52,724	76	7	18	7	115	12,8	9,63	2646,79	32,05	6	7	P62888	60S ribosomal protein L30 OS=Homo sapiens OX=9606 GN=RPL30 PE=1 SV=2	0	Pf01248	6156	ENSG00000156482	RPL30	B2R591;hsa:6156;P04645;P62888;Q502Z6
2764650	1513520	3861360	143666	119732	185184	FALSE		-2,36E+18	NaN	NaN	NaN	0	52,665	13	9	33	9	1338	144,6	5,76	4019,62	48,24	6	9	O15067	Phosphoribosylformylglycinamidine synthase OS=Homo sapiens OX=9606 GN=PFAS PE=1 SV=4	0	Pf02769, Pf13507, Pf18072, Pf18076	5198	ENSG00000178921	PFAS	A6H8V8;hsa:5198;O15067
3278830	1811540	6744690	2357360	801491	661021	FALSE		-6,69E+18	NaN	NaN	NaN	0	52,598	39	10	75	10	318	35,9	7,11	8290,89	65,66	8	10	Q92820	Gamma-glutamyl hydrolase OS=Homo sapiens OX=9606 GN=GGH PE=1 SV=2	0	Pf07722	8836	ENSG00000137563	GGH	hsa:8836;Q92820
8138210	922372	10015500	1562310	1049290	52750	FALSE		1,85E+18	NaN	NaN	NaN	0	52,579	38	6	40	6	264	29,2	5,97	2367,33	94,58	4	6	P28070	Proteasome subunit beta type-4 OS=Homo sapiens OX=9606 GN=PSMB4 PE=1 SV=4	0	Pf00227	5692	ENSG00000159377	PSMB4	B2R9L3;hsa:5692;P28070;P31148;Q5SZS5;Q6IBI4;Q969L6
2514530	1388890	5196480	NaN	NaN	56144,7	FALSE		2,02E+18	NaN	NaN	NaN	0	52,556	46	8	36	8	280	31,2	6,2	4216,55	65,91	5	8	Q13643	Four and a half LIM domains protein 3 OS=Homo sapiens OX=9606 GN=FHL3 PE=1 SV=4	0	Pf00412	2275	ENSG00000183386	FHL3	D3DPT6;hsa:2275;Q13643;Q6I9T0;Q9BVA2
4549860	1395880	4549310	923181	675762	13126	FALSE		-8,01E+18	NaN	NaN	NaN	0	52,491	25	9	58	8	378	39,6	9,01	7476,17	75,78	9	9	P51991	Heterogeneous nuclear ribonucleoprotein A3 OS=Homo sapiens OX=9606 GN=HNRNPA3 PE=1 SV=2	0	Pf00076	220988	ENSG00000170144	HNRNPA3	D3DPF4;hsa:220988;P51991;Q53RW7;Q6URK5
1752880	656096	3186630	68516,5	121687	NaN	FALSE		-2,05E+18	NaN	NaN	NaN	0	52,483	20	11	33	10	784	85,5	7,55	3412,62	36,74	8	11	Q01813	ATP-dependent 6-phosphofructokinase, platelet type OS=Homo sapiens OX=9606 GN=PFKP PE=1 SV=2	1	Pf00365	5214	ENSG00000067057	PFKP	B3KS15;hsa:5214;Q01813;Q5VSR7;Q5VSR8
12673400	992709	21276400	39785000	64819400	1633350	FALSE		7,82E+18	NaN	NaN	NaN	0	52,461	29	8	67	8	245	26	9,11	4187,03	119,93	3	8	P02745	Complement C1q subcomponent subunit A OS=Homo sapiens OX=9606 GN=C1QA PE=1 SV=2	0	Pf00386, Pf01391	712	ENSG00000173372	C1QA	B2R4X2;hsa:712;P02745;Q5T963
1861510	4621020	2326320	24781,6	71882,2	49400	FALSE		-7,9E+18	NaN	NaN	NaN	0	52,373	45	8	33	8	222	25,8	6,32	4690,6	54,68	7	8	Q9Y680	Peptidyl-prolyl cis-trans isomerase FKBP7 OS=Homo sapiens OX=9606 GN=FKBP7 PE=1 SV=2	0	Pf00254, Pf13202	51661	ENSG00000079150	FKBP7	hsa:51661;Q4ZG70;Q6V3B2;Q86U65;Q96DA4;Q9Y680;Q9Y6B0
5964860	7281920	6026960	NaN	725396	35335	TRUE		2,18E+18	NaN	NaN	NaN	0	52,324	55	9	61	9	202	23,2	5,87	7175,18	100,92	6	9	Q3SZR3	SWISS-PROT:Q3SZR3 (Bos taurus) Alpha-1-acid glycoprotein precursor	0	Pf00061	497200		ORM1	bta:497200;Q3SZR3
NaN	31697,5	NaN	8300090	12827900	193304	FALSE		9E+18	NaN	NaN	NaN	0	52,2	48	10	63	10	255	28,8	11,19	5255,6	103,71	7	10	P08311	Cathepsin G OS=Homo sapiens OX=9606 GN=CTSG PE=1 SV=2	0	Pf00089	1511	ENSG00000100448	CTSG	hsa:1511;P08311;Q6IBJ6;Q9UCA5;Q9UCU6
1085990	278163	2676050	4041,13	11128,5	NaN	FALSE	Acetyl [N-Term];Met-loss+Acetyl [N-Term]	3,88E+18	NaN	NaN	NaN	0	52,19	16	8	34	8	781	85,4	5,86	3140,68	39	4	7	P35222	Catenin beta-1 OS=Homo sapiens OX=9606 GN=CTNNB1 PE=1 SV=1	0	Pf00514	1499	ENSG00000168036	CTNNB1	A8K1L7;hsa:1499;P35222;Q8NEW9;Q8NI94;Q9H391
4128660	743855	4886390	15335100	15814200	138472	FALSE		-4,73E+18	NaN	NaN	NaN	0	52,125	28	8	74	8	223	25,4	6,54	8332,27	94,95	8	8	P02743	Serum amyloid P-component OS=Homo sapiens OX=9606 GN=APCS PE=1 SV=2	0	Pf00354	325	ENSG00000132703	APCS	hsa:325;P02743
1742250	1576560	3518020	716117	558819	817059	FALSE		-8,68E+18	NaN	NaN	NaN	0	52,067	22	12	83	12	673	75,8	5,6	7034,65	82,93	9	12	P08133	Annexin A6 OS=Homo sapiens OX=9606 GN=ANXA6 PE=1 SV=3	0	Pf00191	309	ENSG00000197043	ANXA6	B7Z8A7;D3DQH4;E9PGK1;hsa:309;P08133;Q6ZT79
130847	23380,6	128642	30378000	21266600	14157,9	FALSE		1,28E+18	NaN	NaN	NaN	0	52	31	5	41	5	256	27,8	8,35	2554,26	107,99	3	5	P24158	Myeloblastin OS=Homo sapiens OX=9606 GN=PRTN3 PE=1 SV=3	0	Pf00089	5657	ENSG00000196415;ENSG00000277804	PRTN3	hsa:5657;P15637;P18078;P24158;Q4VB08;Q4VB09;Q6LBM7;Q6LBN2;Q9UD25;Q9UQD8
5156450	220752	3041930	533118	490210	139142	FALSE		-7,65E+18	NaN	NaN	NaN	0	51,94	24	5	44	5	400	43,4	5,1	4291,75	73,48	3	5	Q92734	Protein TFG OS=Homo sapiens OX=9606 GN=TFG PE=1 SV=2	0	Pf00564	10342	ENSG00000114354	TFG	D3DN49;G5E9V1;hsa:10342;K0J5S8;K0J6K2;Q15656;Q92734;Q969I2
2514940	4403790	4153380	111226	162214	74478,8	FALSE		4,94E+18	NaN	NaN	NaN	0	51,939	37	12	49	12	459	51,8	5,43	4878,77	54,52	10	11	Q02790	Peptidyl-prolyl cis-trans isomerase FKBP4 OS=Homo sapiens OX=9606 GN=FKBP4 PE=1 SV=3	0	Pf00254, Pf00515	2288	ENSG00000004478	FKBP4	D3DUQ1;hsa:2288;Q02790;Q9UCP1;Q9UCV7
218248	575518	381244	4908960	2990750	2778440	FALSE		-1,51E+18	NaN	NaN	NaN	0	51,888	57	6	97	3	104	11,5	9,1	12964,8	118,21	6	6	P10720	Platelet factor 4 variant OS=Homo sapiens OX=9606 GN=PF4V1 PE=1 SV=1	0	Pf00048	5197	ENSG00000109272	PF4V1	A1L4S0;hsa:5197;P10720
1563700	1849710	2621140	432633	258186	281437	FALSE	Acetyl [N-Term];Met-loss+Acetyl [N-Term]	7,41E+18	NaN	NaN	NaN	0	51,834	31	12	32	12	406	45,6	7,55	3363,85	24,55	8	11	P62195	26S proteasome regulatory subunit 8 OS=Homo sapiens OX=9606 GN=PSMC5 PE=1 SV=1	0	Pf00004, Pf16450, Pf17862	5705	ENSG00000087191	PSMC5	A8K3Z3;A8K763;hsa:5705;O35051;O43208;P47210;P52915;P52916;P62195
2310400	564607	2711610	30778,4	NaN	NaN	FALSE	Acetyl [N-Term];Met-loss+Acetyl [N-Term]	-4,64E+18	NaN	NaN	NaN	0	51,829	67	6	23	4	113	12,7	7,44	2717,88	47,84	4	5	P41567	Eukaryotic translation initiation factor 1 OS=Homo sapiens OX=9606 GN=EIF1 PE=1 SV=1	2	Pf01253	10209	ENSG00000173812	EIF1	hsa:10209;P41567;Q9UNQ9
2443040	436553	2120850	1663870	1262940	591227	FALSE		5,96E+18	NaN	NaN	NaN	0	51,791	38	7	40	7	276	30,3	7,43	5480,66	65,56	6	7	P28062	Proteasome subunit beta type-8 OS=Homo sapiens OX=9606 GN=PSMB8 PE=1 SV=3	0	Pf00227	5696	ENSG00000204264;ENSG00000206298;ENSG00000226201;ENSG00000230034;ENSG00000230669;ENSG00000231631;ENSG00000235715;ENSG00000236443	PSMB8	B0UZC0;hsa:5696;P28062;Q29824;Q5JNW6;Q5QNR8;Q96J48
64766,3	8830,34	16525,1	68591400	50720600	1487180	FALSE		2,09E+18	NaN	NaN	NaN	0	51,723	59	8	55	8	148	16,5	9,16	4178,24	66,47	7	8	P61626	Lysozyme C OS=Homo sapiens OX=9606 GN=LYZ PE=1 SV=1	0	Pf00062	4069	ENSG00000090382	LYZ	hsa:4069;P00695;P61626;Q13170;Q9UCF8
3014140	1665660	5492890	52043,9	274998	122128	FALSE		-1,08E+17	NaN	NaN	NaN	0	51,554	36	9	49	9	371	42,4	5,35	5960,51	66,94	7	9	Q99873	Protein arginine N-methyltransferase 1 OS=Homo sapiens OX=9606 GN=PRMT1 PE=1 SV=3	0	Pf13649	3276	ENSG00000126457	PRMT1	A0A087X1W2;B4E3C3;G5E9B6;H7C2I1;hsa:3276;Q15529;Q2VP93;Q6LEU5;Q8WUW5;Q99872;Q99873;Q99874;Q9NZ04;Q9NZ05;Q9NZ06
1122640	478842	1265410	1609010	1782080	1343960	FALSE		-3,05E+18	NaN	NaN	NaN	0	51,461	43	9	43	9	315	35,1	6,7	3371,02	60,81	5	9	Q9H0W9	Ester hydrolase C11orf54 OS=Homo sapiens OX=9606 GN=C11orf54 PE=1 SV=1	0	Pf08925	28970	ENSG00000182919	C11orf54	A8K850;hsa:28970;Q6FI88;Q6XYB0;Q96EI3;Q96IX1;Q9H0W9;Q9Y6B4
1018480	NaN	1794790	NaN	NaN	NaN	FALSE		7,34E+18	NaN	NaN	NaN	0	51,409	12	10	30	10	1388	141,6	5	2697,66	27,08	8	10	P39059	Collagen alpha-1(XV) chain OS=Homo sapiens OX=9606 GN=COL15A1 PE=1 SV=2	0	Pf01391, Pf06482, Pf20010	1306	ENSG00000204291	COL15A1	hsa:1306;P39059;Q5T6J4;Q9UDC5;Q9Y4W4
2018130	1536640	1431740	836571	1136380	6849,43	FALSE	Met-loss+Acetyl [N-Term]	-3,4E+16	NaN	NaN	NaN	0	51,408	39	11	39	11	335	37,4	5,39	3207,68	39,43	8	11	O76003	Glutaredoxin-3 OS=Homo sapiens OX=9606 GN=GLRX3 PE=1 SV=2	0	Pf00085, Pf00462	10539	ENSG00000108010	GLRX3	B3KMP7;B3KMQ5;D3DRG2;hsa:10539;O76003;Q5JV01;Q96CE0;Q9P1B0;Q9P1B1
779191	1611550	1220360	68987,8	17098	2600,53	FALSE	Met-loss [N-Term]	-7,07E+18	NaN	NaN	NaN	0	51,371	47	8	21	8	359	40,3	6,74	1905,51	29,5	4	8	Q9NR45	Sialic acid synthase OS=Homo sapiens OX=9606 GN=NANS PE=1 SV=2	0	Pf03102	54187	ENSG00000095380	NANS	B2RE98;hsa:54187;Q8WUV9;Q9BWS6;Q9NR45;Q9NVD4
1674450	970488	2301060	NaN	NaN	NaN	FALSE	Acetyl [N-Term];Met-loss+Acetyl [N-Term]	2,56E+18	NaN	NaN	NaN	0	51,229	27	9	20	6	370	41,5	8,18	1876,89	30,15	5	8	Q92747	Actin-related protein 2/3 complex subunit 1A OS=Homo sapiens OX=9606 GN=ARPC1A PE=1 SV=2	0	Pf00400	10552	ENSG00000241685	ARPC1A	A4D276;B4DLQ7;D6W5S1;hsa:10552;Q7Z5U8;Q86WU5;Q8IXQ0;Q92747
4333340	10505700	10030200	67439,8	NaN	NaN	FALSE		4,57E+18	NaN	NaN	NaN	0	51,125	15	8	39	8	742	81,5	5,69	3181,52	72,31	6	8	Q5KU26	Collectin-12 OS=Homo sapiens OX=9606 GN=COLEC12 PE=1 SV=3	0	Pf00059, Pf01391	81035	ENSG00000158270	COLEC12	hsa:81035;Q5KU26;Q6P9F2;Q8TCR2;Q8WZA4;Q9BY85;Q9BYH7
4478940	2848910	5143440	63733400	40383200	5582790	FALSE		-6,1E+18	NaN	NaN	NaN	0	51,099	52	7	221	0	126	13,9	10,32	15460,9	100,87	6	7	Q5QNW6	Histone H2B type 2-F OS=Homo sapiens OX=9606 GN=H2BC18 PE=1 SV=3	9	Pf00125	440689	ENSG00000203814	H2BC18	A8K0U9;B4DLA9;hsa:440689;Q5QNW6
5106580	2668660	7528840	5068510	5620040	NaN	FALSE		4,57E+18	NaN	NaN	NaN	0	51,057	48	9	32	9	261	28,8	4,69	3663,17	45,75	5	9	P12004	Proliferating cell nuclear antigen OS=Homo sapiens OX=9606 GN=PCNA PE=1 SV=1	0	Pf00705, Pf02747	5111	ENSG00000132646	PCNA	B2R897;D3DW02;hsa:5111;P12004
2889880	747754	2510350	7420080	5420420	517348	FALSE		7,66E+18	NaN	NaN	NaN	0	51,023	38	12	103	12	341	39,8	6,89	9770,99	74,66	12	12	Q9Y376	Calcium-binding protein 39 OS=Homo sapiens OX=9606 GN=CAB39 PE=1 SV=1	0	Pf08569	51719	ENSG00000135932	CAB39	A8K8L7;hsa:51719;Q9Y376
482411	1016820	396518	4824440	3291750	1211450	FALSE	Acetyl [N-Term];Met-loss+Acetyl [N-Term]	6,67E+18	NaN	NaN	NaN	0	50,996	33	8	49	8	261	29,8	5,55	5188,16	74,45	5	7	O15400	Syntaxin-7 OS=Homo sapiens OX=9606 GN=STX7 PE=1 SV=4	0	Pf05739, Pf14523	8417	ENSG00000079950	STX7	E1P579;hsa:8417;O15400;Q5SZW2;Q96ES9
4897530	1853250	6109030	294608	365032	10902,7	FALSE		6,93E+18	NaN	NaN	NaN	0	50,989	36	11	63	11	333	38,4	5,8	5212,35	63,01	7	11	P20042	Eukaryotic translation initiation factor 2 subunit 2 OS=Homo sapiens OX=9606 GN=EIF2S2 PE=1 SV=2	0	Pf01873	8894	ENSG00000125977	EIF2S2	hsa:8894;P20042;Q9BVU0;Q9UJE4
72013,5	NaN	NaN	17253200	22750300	NaN	FALSE		-5,92E+18	NaN	NaN	NaN	0	50,963	57	5	70	3	118	12,9	7,08	7249,63	93,99	3	5	P01782	Immunoglobulin heavy variable 3-9 OS=Homo sapiens OX=9606 GN=IGHV3-9 PE=1 SV=2	0	Pf07686			IGHV3-9	P01782
45508000	2670950	53672600	16764700	15937300	2980310	FALSE		-3,98E+18	NaN	NaN	NaN	0	50,933	58	9	142	9	156	18	9,64	14638,6	156,95	8	9	P62979	Ubiquitin-40S ribosomal protein S27a OS=Homo sapiens OX=9606 GN=RPS27A PE=1 SV=2	0	Pf00240, Pf01599	6233	ENSG00000143947	RPS27A	hsa:6233;P02248;P02249;P02250;P14798;P62979;P62988;Q29120;Q6LBL4;Q6LDU5;Q8WYN8;Q91887;Q91888;Q9BQ77;Q9BWD6;Q9BX98;Q9UEF2;Q9UEG1;Q9UEK8;Q9UPK7
1438640	NaN	2046870	35446	43338,7	NaN	FALSE		-2,45E+18	NaN	NaN	NaN	0	50,797	9	9	28	9	1798	195,9	6,52	1975,24	43,53	6	9	P55268	Laminin subunit beta-2 OS=Homo sapiens OX=9606 GN=LAMB2 PE=1 SV=2	0	Pf00053, Pf00055	3913	ENSG00000172037	LAMB2	hsa:3913;P55268;Q16321
1942880	1901680	2673060	13433,6	6131,26	15438,6	FALSE		-4,74E+18	NaN	NaN	NaN	0	50,718	10	11	36	11	1683	192,6	8,09	3230,01	43,58	8	11	Q8WWI1	LIM domain only protein 7 OS=Homo sapiens OX=9606 GN=LMO7 PE=1 SV=3	0	Pf00307, Pf00412, Pf00595, Pf15949	4008	ENSG00000136153	LMO7	E9PLH4;hsa:4008;O15462;O95346;Q5TBK6;Q8WWI1;Q9UKC1;Q9UQM5;Q9Y6A7
6812970	4893360	9713610	8804,24	50777,1	72085,7	FALSE	Met-loss [N-Term]	3,66E+18	NaN	NaN	NaN	0	50,613	51	6	54	6	97	11,2	7,37	6176,92	55,63	5	5	P60903	Protein S100-A10 OS=Homo sapiens OX=9606 GN=S100A10 PE=1 SV=2	0	Pf01023	6281	ENSG00000197747	S100A10	A8K4V8;hsa:6281;P08206;P60903;Q5T1C5
2241090	9806200	3164210	1742960	1703350	85820,8	FALSE		6,64E+18	NaN	NaN	NaN	0	50,605	59	11	46	11	216	24,4	7,49	3825,42	39,75	7	11	P62826	GTP-binding nuclear protein Ran OS=Homo sapiens OX=9606 GN=RAN PE=1 SV=3	0	Pf00071	5901	ENSG00000132341	RAN	A8K3Z8;hsa:5901;P17080;P28746;P28747;P62826;Q6IPB2;Q86V08;Q8NI90;Q9CSP3;Q9CWI7;Q9CZA2;Q9UDJ5;Q9UEU9
650128	1340320	1298390	6582,73	NaN	5193,87	FALSE		6,55E+18	NaN	NaN	NaN	0	50,521	35	9	28	9	514	55,8	6,9	3159,99	25,1	7	9	P12268	Inosine-5'-monophosphate dehydrogenase 2 OS=Homo sapiens OX=9606 GN=IMPDH2 PE=1 SV=2	0	Pf00478, Pf00571	3615	ENSG00000178035	IMPDH2	hsa:3615;P12268;Q6LEF3
4062060	1728690	3813270	349929	100146	32416,9	FALSE		6,54E+17	NaN	NaN	NaN	0	50,341	39	9	30	9	390	43	5,26	2598,03	44,33	4	9	Q12905	Interleukin enhancer-binding factor 2 OS=Homo sapiens OX=9606 GN=ILF2 PE=1 SV=2	0	Pf07528	3608	ENSG00000143621	ILF2	A6NDB0;B2R8G7;hsa:3608;Q12905;Q5SR10;Q5SR11;Q7L7R3;Q9BWD4;Q9P1N0
729030	1105800	562210	33773,6	NaN	21792,3	FALSE		1,71E+18	NaN	NaN	NaN	0	50,294	24	9	42	7	593	64,7	5,06	3791,76	55,11	6	9	O00499	Myc box-dependent-interacting protein 1 OS=Homo sapiens OX=9606 GN=BIN1 PE=1 SV=1	0	Pf03114, Pf14604	274	ENSG00000136717	BIN1	hsa:274;O00297;O00499;O00545;O43867;O60552;O60553;O60554;O60555;O75514;O75515;O75516;O75517;O75518;Q659B7;Q92944;Q99688
125673	7096,74	113075	9951580	6777200	1439760	FALSE		-6,97E+18	NaN	NaN	NaN	0	50,287	29	10	51	10	261	28,1	5,91	5171,09	58,29	10	10	Q969T9	WW domain-binding protein 2 OS=Homo sapiens OX=9606 GN=WBP2 PE=1 SV=1	0	Pf02893	23558	ENSG00000132471	WBP2	B4DFG2;hsa:23558;O95638;Q969T9
77421,3	95650,8	65256,6	54131,8	614162	59536,5	TRUE		-6,09E+18	NaN	NaN	NaN	0	50,263	19	10	46	3	472	51,5	5,16	5436,8	55,64	10	10	P02533	Keratin, type I cytoskeletal 14 OS=Homo sapiens OX=9606 GN=KRT14 PE=1 SV=4	3	Pf00038	3861	ENSG00000186847	KRT14	hsa:3861;P02533;Q14715;Q53XY3;Q9BUE3;Q9UBN2;Q9UBN3;Q9UCY4
8573040	6959830	11790800	5926160	1438720	2150470	FALSE		8,18E+18	NaN	NaN	NaN	0	49,957	93	7	76	6	115	11,7	4,54	9624,28	111,77	5	7	P05387	60S acidic ribosomal protein P2 OS=Homo sapiens OX=9606 GN=RPLP2 PE=1 SV=1	1	Pf00428	6181	ENSG00000177600	RPLP2	hsa:6181;P05387;Q6FG96
2251190	403083	3310320	7344200	3107350	356609	FALSE		-8,88E+18	NaN	NaN	NaN	0	49,899	39	9	54	9	271	31,5	6,87	3492,56	58,18	5	9	P48739	Phosphatidylinositol transfer protein beta isoform OS=Homo sapiens OX=9606 GN=PITPNB PE=1 SV=2	0	Pf02121	23760	ENSG00000180957	PITPNB	B3KYB8;B7Z7Q0;hsa:23760;P48739;Q8N5W1
2968680	3017990	3992720	194254	52508,7	24297,4	FALSE		2,81E+18	NaN	NaN	NaN	0	49,854	32	10	37	10	496	55,8	7,21	3078,47	64,13	6	10	P42785	Lysosomal Pro-X carboxypeptidase OS=Homo sapiens OX=9606 GN=PRCP PE=1 SV=1	0	Pf05577	5547	ENSG00000137509	PRCP	A8MU24;B2R7B7;B3KRK5;B5BU34;hsa:5547;P42785
3849740	1118390	6238510	1971500	1828270	163010	FALSE		-3,14E+18	NaN	NaN	NaN	0	49,726	29	8	98	5	251	28,8	4,06	9656,3	102,61	7	8	Q92688	Acidic leucine-rich nuclear phosphoprotein 32 family member B OS=Homo sapiens OX=9606 GN=ANP32B PE=1 SV=1	0	Pf12799	10541	ENSG00000136938	ANP32B	B2R9C7;hsa:10541;O00655;P78458;P78459;Q92688
6484230	3634840	7029160	NaN	4499,11	6196,89	FALSE	Met-loss+Acetyl [N-Term]	8,64E+17	NaN	NaN	NaN	0	49,504	65	7	44	7	140	15	6,99	5008,27	69,47	4	7	P35080	Profilin-2 OS=Homo sapiens OX=9606 GN=PFN2 PE=1 SV=3	0	Pf00235	5217	ENSG00000070087	PFN2	B2R4C8;D3DNI4;hsa:5217;P35080;Q4VBQ4;Q8WVF9;Q9HBK2
4547280	1445590	5825650	1020780	661498	138566	FALSE		3,2E+18	NaN	NaN	NaN	0	49,451	20	10	69	9	556	63,1	6,76	7087,44	81,82	9	10	P07686	Beta-hexosaminidase subunit beta OS=Homo sapiens OX=9606 GN=HEXB PE=1 SV=4	0	Pf00728, Pf14845	3074	ENSG00000049860	HEXB	hsa:3074;P07686
203195	435625	157469	13507100	18889000	923020	FALSE	Acetyl [N-Term];Met-loss+Acetyl [N-Term]	5,51E+17	NaN	NaN	NaN	0	49,413	49	10	63	10	218	24,6	5,52	6093,09	80,97	8	9	O00194	Ras-related protein Rab-27B OS=Homo sapiens OX=9606 GN=RAB27B PE=1 SV=4	0	Pf00071	5874	ENSG00000041353	RAB27B	B2RAB0;hsa:5874;O00194;Q9BZB6
2182770	NaN	2596930	NaN	NaN	NaN	FALSE		-4,48E+18	NaN	NaN	NaN	0	49,384	25	6	26	6	417	46,9	8,09	3950,58	48,81	4	6	P28300	Protein-lysine 6-oxidase OS=Homo sapiens OX=9606 GN=LOX PE=1 SV=2	0	Pf01186	4015	ENSG00000113083	LOX	B2R5Q3;hsa:4015;P28300;Q5FWF0
1268720	734638	1566820	28572,2	21780,7	2774,6	FALSE		2,65E+18	NaN	NaN	NaN	0	49,361	29	8	37	8	468	54,4	5,68	3008,07	39,23	7	8	Q96HE7	ERO1-like protein alpha OS=Homo sapiens OX=9606 GN=ERO1A PE=1 SV=2	0	Pf04137	30001	ENSG00000197930	ERO1A	A8K9X4;A8MYW1;hsa:30001;Q7LD45;Q96HE7;Q9P1Q9;Q9UKV6
1223080	1257770	2468410	883579	3299920	279993	FALSE		-7,31E+18	NaN	NaN	NaN	0	49,352	35	9	26	7	209	24	7,81	2394,19	24,74	8	9	P26583	High mobility group protein B2 OS=Homo sapiens OX=9606 GN=HMGB2 PE=1 SV=2	0	Pf00505, Pf09011	3148	ENSG00000164104	HMGB2	B2R4K8;D3DP37;hsa:3148;P26583;Q5U072
4922150	3907450	6395820	5722360	9313040	853696	FALSE	Acetyl [N-Term];Met-loss+Acetyl [N-Term]	2,46E+18	NaN	NaN	NaN	0	48,873	29	8	60	2	221	22,3	11,02	7425,33	75,32	7	7	P16402	Histone H1.3 OS=Homo sapiens OX=9606 GN=H1-3 PE=1 SV=2	6	Pf00538	3007	ENSG00000124575	H1-3	B2R751;hsa:3007;P16402;Q2M2I2
2526510	3162150	3986270	2918600	3039120	293066	FALSE		4,76E+18	NaN	NaN	NaN	0	48,872	57	9	59	2	193	21,8	6,1	5265,15	75,84	5	9	P61586	Transforming protein RhoA OS=Homo sapiens OX=9606 GN=RHOA PE=1 SV=1	7	Pf00071	387	ENSG00000067560	RHOA	hsa:387;P06749;P61586;Q53HM4;Q5U024;Q9UDJ0;Q9UEJ4
2032950	408505	1469310	3085360	4794420	752663	FALSE	Acetyl [N-Term]	5,91E+18	NaN	NaN	NaN	0	48,812	30	13	46	13	452	51,4	8,07	3688,99	65,22	10	13	Q13418	Integrin-linked protein kinase OS=Homo sapiens OX=9606 GN=ILK PE=1 SV=2	0	Pf07714, Pf12796	3611	ENSG00000166333	ILK	B7Z1I0;B7Z418;D3DQU0;hsa:3611;P57043;Q13418;Q68DZ3
22624	NaN	49367,2	3621240	2642710	582908	FALSE		4,33E+18	NaN	NaN	NaN	0	48,787	8	9	49	9	1337	145,9	5,58	6595	66,38	9	9	Q12913	Receptor-type tyrosine-protein phosphatase eta OS=Homo sapiens OX=9606 GN=PTPRJ PE=1 SV=3	0	Pf00041, Pf00102, Pf18861	5795	ENSG00000149177	PTPRJ	hsa:5795;Q12913;Q15255;Q6P4H4;Q8NHM2;Q9UDA9
1136080	1723730	1431360	1151510	483389	114253	FALSE	Acetyl [N-Term]	9,07E+18	NaN	NaN	NaN	0	48,634	53	8	39	8	226	24,4	6,1	3350,32	42,44	5	8	O75832	26S proteasome non-ATPase regulatory subunit 10 OS=Homo sapiens OX=9606 GN=PSMD10 PE=1 SV=1	0	Pf12796	5716	ENSG00000101843	PSMD10	hsa:5716;O75832;Q5U0B2;Q8IZK9
1463660	1457830	1178980	46723	1319,85	NaN	FALSE	Met-loss [N-Term]	-8,14E+18	NaN	NaN	NaN	0	48,342	25	11	46	11	585	64,9	8,87	3700,74	34,58	8	10	Q9BY44	Eukaryotic translation initiation factor 2A OS=Homo sapiens OX=9606 GN=EIF2A PE=1 SV=3	0	Pf08662	83939	ENSG00000144895	EIF2A	A8MPS6;B4DF96;B4DQ14;D3DNI9;hsa:83939;Q5QTR2;Q7Z4E9;Q8NFM1;Q96EW9;Q96K81;Q9BY44
6454280	4341210	7437280	705187	424621	NaN	FALSE	Met-loss [N-Term]	3,55E+18	NaN	NaN	NaN	0	48,124	33	10	77	10	320	35,6	6,13	7814,29	98,2	9	10	O75821	Eukaryotic translation initiation factor 3 subunit G OS=Homo sapiens OX=9606 GN=EIF3G PE=1 SV=2	0	Pf00076, Pf12353	8666	ENSG00000130811	EIF3G	hsa:8666;O14801;O75821;Q969U5
7749340	3682520	11204000	17830000	3206240	2830120	FALSE		7,86E+18	NaN	NaN	NaN	0	48,12	21	10	46	10	592	67,9	6,32	3614,37	40,13	9	10	P32455	Guanylate-binding protein 1 OS=Homo sapiens OX=9606 GN=GBP1 PE=1 SV=2	0	Pf02263, Pf02841	2633	ENSG00000117228	GBP1	D3DT26;hsa:2633;P32455;Q5T8M1
2005540	1587830	2294300	575735	1123570	267021	FALSE		8,79E+15	NaN	NaN	NaN	0	48,099	50	10	35	10	288	31,7	7,66	2944,94	56,4	6	10	Q8NCW5	NAD(P)H-hydrate epimerase OS=Homo sapiens OX=9606 GN=NAXE PE=1 SV=2	0	Pf03853	128240	ENSG00000163382	NAXE	B4DGY3;hsa:128240;Q496C6;Q5T3I2;Q8NCW5
2717250	2894900	8302820	NaN	23193,3	NaN	FALSE		7,91E+18	NaN	NaN	NaN	0	47,988	19	11	41	11	909	99,5	8,4	3342,32	41,53	8	11	O43184	Disintegrin and metalloproteinase domain-containing protein 12 OS=Homo sapiens OX=9606 GN=ADAM12 PE=1 SV=3	0	Pf00200, Pf01421, Pf01562, Pf08516	8038	ENSG00000148848	ADAM12	hsa:8038;O43184;O60470;Q5JRP0;Q5JRP1;Q6P9E3;Q6UWB0
4575210	729606	5733010	55261,8	88366,2	NaN	FALSE	Acetyl [N-Term];Met-loss+Acetyl [N-Term]	8,83E+18	NaN	NaN	NaN	0	47,955	42	9	33	9	248	27,4	7,23	2316,53	47,91	6	8	Q15056	Eukaryotic translation initiation factor 4H OS=Homo sapiens OX=9606 GN=EIF4H PE=1 SV=5	0	Pf00076	7458	ENSG00000106682	EIF4H	A8K3R1;D3DXF6;D3DXF8;hsa:7458;Q15056
5762710	12745,2	6945330	6778480	7472400	21351,5	FALSE		-9,15E+18	NaN	NaN	NaN	0	47,756	46	8	73	8	268	28,3	5,2	8042,03	121,98	6	8	P04632	Calpain small subunit 1 OS=Homo sapiens OX=9606 GN=CAPNS1 PE=1 SV=1	0		826	ENSG00000126247	CAPNS1	A8K0P1;hsa:826;P04632;Q8WTX3;Q96EW0
3913930	1393510	5432060	738247	732930	58926,6	FALSE		-6,66E+18	NaN	NaN	NaN	0	47,727	24	8	49	8	521	58,7	5,86	3471,13	76,86	4	8	Q08209	Protein phosphatase 3 catalytic subunit alpha OS=Homo sapiens OX=9606 GN=PPP3CA PE=1 SV=1	0	Pf00149	5530	ENSG00000138814	PPP3CA	A1A441;A8K3B7;A8W6Z7;A8W6Z8;B5BUA2;hsa:5530;Q08209;Q8TAW9
2605390	7647390	5408430	46503,6	NaN	8696280	FALSE		-6,29E+18	NaN	NaN	NaN	0	47,723	56	11	44	11	227	24,7	8,29	4359,04	53,66	10	11	Q92520	Protein FAM3C OS=Homo sapiens OX=9606 GN=FAM3C PE=1 SV=1	0	Pf15711	10447	ENSG00000196937	FAM3C	A6NDN2;A8K3R7;hsa:10447;Q92520
4022260	712753	4216830	1463970	933194	228734	FALSE	Acetyl [N-Term];Met-loss+Acetyl [N-Term]	-2,53E+18	NaN	NaN	NaN	0	47,675	34	7	48	7	298	32,4	7,53	2664,16	98,41	3	6	O00560	Syntenin-1 OS=Homo sapiens OX=9606 GN=SDCBP PE=1 SV=1	0	Pf00595, Pf02163	6386	ENSG00000137575	SDCBP	B2R5Q7;B4DUH3;B7ZLN2;hsa:6386;O00173;O00560;O43391;Q14CP2
6543530	1761080	7460770	2066390	1532120	48066,7	FALSE		5,82E+18	NaN	NaN	NaN	0	47,67	30	10	51	10	378	44,4	5,25	4454,93	72,1	8	10	Q16543	Hsp90 co-chaperone Cdc37 OS=Homo sapiens OX=9606 GN=CDC37 PE=1 SV=1	0	Pf03234, Pf08564, Pf08565	11140	ENSG00000105401	CDC37	hsa:11140;Q16543;Q53YA2
1057840	8672,55	1395570	350307	206192	NaN	FALSE		5,29E+18	NaN	NaN	NaN	0	47,603	29	10	60	4	407	46,4	5,48	6129,34	46,59	10	10	Q14240	Eukaryotic initiation factor 4A-II OS=Homo sapiens OX=9606 GN=EIF4A2 PE=1 SV=2	0	Pf00270, Pf00271	1974	ENSG00000156976	EIF4A2	D3DNU9;hsa:1974;Q14240;Q53XJ6;Q96B90;Q96EA8
1403220	1222480	1376950	1741800	1320860	257590	FALSE		3,23E+18	NaN	NaN	NaN	0	47,467	22	10	43	9	593	66,4	6,55	4287,28	29,74	10	10	Q15833	Syntaxin-binding protein 2 OS=Homo sapiens OX=9606 GN=STXBP2 PE=1 SV=2	1	Pf00995	6813	ENSG00000076944	STXBP2	B4E175;E7EQD5;hsa:6813;Q15833;Q9BU65
7955110	637266	6741960	273297	215842	6088,09	FALSE	Met-loss+Acetyl [N-Term]	-8,33E+17	NaN	NaN	NaN	0	47,434	77	6	47	6	147	15,9	4,86	3939,26	94,44	2	6	Q96C90	Protein phosphatase 1 regulatory subunit 14B OS=Homo sapiens OX=9606 GN=PPP1R14B PE=1 SV=3	0	Pf05361	26472	ENSG00000173457	PPP1R14B	hsa:26472;Q504S7;Q7KZD7;Q96C90
501223	1375600	1020940	752469	1715300	NaN	FALSE		-2E+18	NaN	NaN	NaN	0	47,414	26	9	32	9	461	51,7	5,47	2432,53	21,9	8	9	P00740	Coagulation factor IX OS=Homo sapiens OX=9606 GN=F9 PE=1 SV=2	0	Pf00008, Pf00089, Pf00594, Pf14670	2158	ENSG00000101981	F9	A8K9N4;F2RM36;hsa:2158;P00740;Q5FBE1;Q5JYJ8
2408970	897364	2597920	46100,3	25716,3	25847,5	FALSE		-3,28E+18	NaN	NaN	NaN	0	47,369	9	8	31	8	1304	145,7	7,09	3255,73	49,6	6	8	O75533	Splicing factor 3B subunit 1 OS=Homo sapiens OX=9606 GN=SF3B1 PE=1 SV=3	0	Pf08920	23451	ENSG00000115524	SF3B1	E9PCH3;hsa:23451;O75533
743633	689393	657091	1834580	1905120	741648	FALSE	Acetyl [N-Term];Met-loss+Acetyl [N-Term]	-1,67E+18	NaN	NaN	NaN	0	47,353	29	11	49	7	340	37,4	6	4434,06	34,05	7	9	P62873	Guanine nucleotide-binding protein G(I)/G(S)/G(T) subunit beta-1 OS=Homo sapiens OX=9606 GN=GNB1 PE=1 SV=3	3	Pf00400	2782	ENSG00000078369	GNB1	B1AJZ7;hsa:2782;P04697;P04901;P62873;Q1RMY8
1013160	NaN	1165450	33361,9	181106	NaN	FALSE		-4,61E+18	NaN	NaN	NaN	0	47,339	10	8	26	8	1754	178,1	6,01	3058,48	31,41	5	8	P39060	Collagen alpha-1(XVIII) chain OS=Homo sapiens OX=9606 GN=COL18A1 PE=1 SV=5	0	Pf01391, Pf01392, Pf06121, Pf06482, Pf20010	80781	ENSG00000182871	COL18A1	A8MVI4;hsa:80781;P39060;Q58EX6;Q6RZ39;Q6RZ40;Q6RZ41;Q8N4S4;Q8WXI5;Q96T70;Q9UK38;Q9Y6Q7;Q9Y6Q8
2585260	1334190	2739670	257156	20664,1	226423	FALSE		8,32E+18	NaN	NaN	NaN	0	47,311	39	9	42	9	334	37,5	7,36	3928,05	45,21	7	9	Q9NZL9	Methionine adenosyltransferase 2 subunit beta OS=Homo sapiens OX=9606 GN=MAT2B PE=1 SV=1	0	Pf04321	27430	ENSG00000038274	MAT2B	B2R5Y6;hsa:27430;Q1WAI7;Q27J92;Q3LIE8;Q567T7;Q6NYC7;Q9BS89;Q9H3E1;Q9NZL9;Q9UJ54
1810250	3628000	1651510	222202	74357,6	128821	FALSE		-2,31E+18	NaN	NaN	NaN	0	47,28	39	8	27	8	237	26,8	6,87	3108,58	32,82	7	8	Q9Y3B8	Oligoribonuclease, mitochondrial OS=Homo sapiens OX=9606 GN=REXO2 PE=1 SV=3	0	Pf00929	25996	ENSG00000076043	REXO2	B2R532;hsa:25996;Q32Q18;Q53FT1;Q6FIC6;Q9UFY7;Q9Y3B8
5735070	45104,4	5856210	2808520	1080650	61648,1	FALSE		4,68E+18	NaN	NaN	NaN	0	47,088	62	8	75	8	170	19,3	4,81	6173,36	55,83	6	8	P63098	Calcineurin subunit B type 1 OS=Homo sapiens OX=9606 GN=PPP3R1 PE=1 SV=2	0	Pf13499	5534	ENSG00000221823	PPP3R1	B2RC10;B5MDU4;hsa:5534;P06705;P15117;P63098;Q08044;Q53SL0
1253270	934137	1716230	1944940	1515080	276892	FALSE		-5,38E+18	NaN	NaN	NaN	0	46,756	30	9	37	9	393	41,9	6,29	3193,71	31,76	8	9	Q99536	Synaptic vesicle membrane protein VAT-1 homolog OS=Homo sapiens OX=9606 GN=VAT1 PE=1 SV=2	0	Pf08240, Pf13602	10493	ENSG00000108828	VAT1	A8K345;B0AZP7;B4DPX4;hsa:10493;Q13035;Q5BKZ7;Q96A39;Q99536;Q9BUT8
1608910	205444	6396830	NaN	NaN	NaN	FALSE		5,96E+18	NaN	NaN	NaN	0	46,64	10	8	22	8	1604	157,7	7,84	1724,3	42,1	3	8	Q07092	Collagen alpha-1(XVI) chain OS=Homo sapiens OX=9606 GN=COL16A1 PE=1 SV=2	0	Pf01391	1307	ENSG00000084636	COL16A1	hsa:1307;Q07092;Q16593;Q59F89;Q71RG9
3329730	583200	4589970	NaN	NaN	74811,2	FALSE		-3,77E+18	NaN	NaN	NaN	0	46,461	20	8	19	8	967	105,3	6,83	925,09	52,64	2	8	Q9UHI8	A disintegrin and metalloproteinase with thrombospondin motifs 1 OS=Homo sapiens OX=9606 GN=ADAMTS1 PE=1 SV=4	0	Pf00090, Pf01421, Pf01562, Pf05986, Pf17771, Pf19030, Pf19236	9510	ENSG00000154734	ADAMTS1	D3DSD5;hsa:9510;Q9NSJ8;Q9P2K0;Q9UH83;Q9UHI8;Q9UP80
4084670	940620	3528490	1879930	1258980	417377	FALSE	Acetyl [N-Term];Met-loss+Acetyl [N-Term]	9,81E+17	NaN	NaN	NaN	0	46,439	32	9	56	9	332	37,5	7,87	4982,39	52,04	7	8	Q9UHD1	Cysteine and histidine-rich domain-containing protein 1 OS=Homo sapiens OX=9606 GN=CHORDC1 PE=1 SV=2	0	Pf04968, Pf04969	26973	ENSG00000110172;ENSG00000285023	CHORDC1	B2R6P8;hsa:26973;Q6IN49;Q8WVL9;Q9H3D6;Q9UHD1
2223680	427907	2328140	13517,8	6278,82	NaN	FALSE		7,5E+18	NaN	NaN	NaN	0	46,395	21	9	32	8	591	66,5	6,93	2489,27	54,53	6	9	Q8N8S7	Protein enabled homolog OS=Homo sapiens OX=9606 GN=ENAH PE=1 SV=2	1	Pf00568, Pf08776	55740	ENSG00000154380	ENAH	D0PQI2;hsa:55740;Q502W5;Q5T5M7;Q5VTQ9;Q5VTR0;Q8N8S7;Q9NVF3;Q9UFB8
7260090	9966760	19253200	5574520	3154460	3541280	FALSE		6,8E+18	NaN	NaN	NaN	0	46,268	46	6	85	6	151	16,6	7,65	8250,31	127,53	5	6	P61916	NPC intracellular cholesterol transporter 2 OS=Homo sapiens OX=9606 GN=NPC2 PE=1 SV=1	0	Pf02221	10577	ENSG00000119655	NPC2	B4DQV7;hsa:10577;P61916;Q15668;Q29413
2409060	1134830	1626900	280428	132376	88237,7	FALSE		-4,5E+18	NaN	NaN	NaN	0	46,224	16	10	29	10	962	107,8	4,91	2696,21	37,54	7	10	O60763	General vesicular transport factor p115 OS=Homo sapiens OX=9606 GN=USO1 PE=1 SV=2	0	Pf04869, Pf04871, Pf18770	8615	ENSG00000138768	USO1	B2RAQ0;hsa:8615;O60763;Q6PK63;Q86TB8;Q8N592
3049470	1487690	3067640	859769	578905	43375,9	FALSE		2,66E+18	NaN	NaN	NaN	0	46,144	47	10	44	10	219	24,3	4,94	4059,51	45,19	8	10	Q9UKK9	ADP-sugar pyrophosphatase OS=Homo sapiens OX=9606 GN=NUDT5 PE=1 SV=1	0	Pf00293	11164	ENSG00000165609	NUDT5	A8K516;hsa:11164;Q6IAG0;Q9UH49;Q9UKK9
1454740	1225580	1536510	1249910	1507650	30933,8	FALSE		-4,28E+18	NaN	NaN	NaN	0	46,038	49	7	42	7	178	20	7,56	4652,09	68,24	6	7	P32321	Deoxycytidylate deaminase OS=Homo sapiens OX=9606 GN=DCTD PE=1 SV=2	0	Pf00383	1635	ENSG00000129187	DCTD	B2R836;D3DP49;D3DP50;hsa:1635;P32321;Q5M7Z8;Q9BVD8
1188820	163552	972222	1162200	575523	115442	FALSE	Met-loss+Acetyl [N-Term]	6,93E+18	NaN	NaN	NaN	0	46	32	7	39	7	419	46,3	6,95	2596,47	43,49	4	7	P16930	Fumarylacetoacetase OS=Homo sapiens OX=9606 GN=FAH PE=1 SV=2	0	Pf01557, Pf09298	2184	ENSG00000103876	FAH	B2R9X1;D3DW95;hsa:2184;P16930;Q53XA7
8935870	3788240	8968890	1026360	301100	5142,45	FALSE		-4,49E+18	NaN	NaN	NaN	0	45,874	62	7	50	7	130	15	5,02	5872,5	56,28	6	7	Q15121	Astrocytic phosphoprotein PEA-15 OS=Homo sapiens OX=9606 GN=PEA15 PE=1 SV=2	0	Pf01335	8682	ENSG00000162734	PEA15	B1AKZ3;hsa:8682;O00511;Q15121
928036	1657650	1419940	806517	818941	1633760	FALSE		4,1E+18	NaN	NaN	NaN	0	45,867	72	10	62	4	145	16,4	8,09	5702,16	87,62	8	10	Q15819	Ubiquitin-conjugating enzyme E2 variant 2 OS=Homo sapiens OX=9606 GN=UBE2V2 PE=1 SV=4	0	Pf00179	7336	ENSG00000169139	UBE2V2	hsa:7336;Q15819
1089220	870376	962937	68661	22466,7	64877,4	FALSE		1,39E+18	NaN	NaN	NaN	0	45,846	26	7	34	7	523	55,8	6,87	2926,85	47,34	3	7	Q8NDH3	Probable aminopeptidase NPEPL1 OS=Homo sapiens OX=9606 GN=NPEPL1 PE=1 SV=3	0	Pf00883, Pf18295	79716	ENSG00000215440	NPEPL1	A6NGZ0;B4DMW7;B7ZBN0;E9PN47;G5EA34;hsa:79716;Q53G37;Q5W083;Q8NDH3;Q8TF28;Q8WUI2;Q9H1T6;Q9HAI5
8462480	1829790	5527850	9574940	3780370	1130550	FALSE	Acetyl [N-Term];Met-loss+Acetyl [N-Term]	-1,15E+17	NaN	NaN	NaN	0	45,771	77	8	38	8	106	11,8	8,09	1792,67	87,77	3	7	P35754	Glutaredoxin-1 OS=Homo sapiens OX=9606 GN=GLRX PE=1 SV=2	0	Pf00462	2745	ENSG00000173221	GLRX	B2R4L2;hsa:2745;P35754;Q3KQS1;Q6ICT1
4895070	1542520	5558750	16674300	8926430	3668520	FALSE		-9,01E+18	NaN	NaN	NaN	0	45,666	35	10	75	10	381	43	5,35	7825,42	94,54	7	10	P10644	cAMP-dependent protein kinase type I-alpha regulatory subunit OS=Homo sapiens OX=9606 GN=PRKAR1A PE=1 SV=1	0	Pf00027, Pf02197	5573	ENSG00000108946	PRKAR1A	hsa:5573;K7ER48;P10644;Q567S7
223592	463972	385723	3032860	9490970	51107,1	FALSE		4,86E+18	NaN	NaN	NaN	0	45,615	23	9	34	9	560	62,6	6,54	3120,47	35,86	8	9	Q14520	Hyaluronan-binding protein 2 OS=Homo sapiens OX=9606 GN=HABP2 PE=1 SV=1	0	Pf00008, Pf00051, Pf00089	3026	ENSG00000148702	HABP2	A8K467;B7Z8U5;F5H5M6;hsa:3026;O00663;Q14520
1418400	229164	1820990	6872,53	341487	NaN	FALSE		-3,09E+18	NaN	NaN	NaN	0	45,59	29	8	30	8	563	61,2	6,48	2619,1	36,72	4	8	O14773	Tripeptidyl-peptidase 1 OS=Homo sapiens OX=9606 GN=TPP1 PE=1 SV=2	0	Pf00082, Pf09286	1200	ENSG00000166340	TPP1	hsa:1200;O14773;Q53HT1;Q5JAK6;Q6UX56;Q71JP6;Q96C37
1235830	10657,7	2149910	2278910	1459170	974,203	FALSE		-8,12E+18	NaN	NaN	NaN	0	45,587	27	7	64	2	362	40,4	5,85	8346,48	91,79	7	7	P01889	HLA class I histocompatibility antigen, B alpha chain OS=Homo sapiens OX=9606 GN=HLA-B PE=1 SV=3	2	Pf00129, Pf06623, Pf07654	3106	ENSG00000234745	HLA-B	A0A2I6Q7B5;B0V0B8;G3GN01;hsa:3106;O02862;O02956;O02957;O02960;O19555;O19556;O19595;O19615;O19624;O19625;O19627;O19641;O19651;O19675;O19692;O19758;O19779;O19783;O46702;O62897;O62901;O62915;O62917;O62919;O77933;O77959;O78053;O78138;O78160;O78163;O78172;O78173;O78180;O78217;O95730;O98140;P01889;P01890;P03989;P10317;P10318;P10319;P10320;P18463;P18464;P18465;P19373;P30460;P30461;P30462;P30463;P30464;P…
604308	4275530	735484	284592	306938	25046,6	FALSE		5,02E+18	NaN	NaN	NaN	0	45,455	73	12	37	8	218	25,7	6,37	3802,72	37,72	10	12	P28161	Glutathione S-transferase Mu 2 OS=Homo sapiens OX=9606 GN=GSTM2 PE=1 SV=2	4	Pf00043, Pf02798	2946	ENSG00000213366	GSTM2	B4DRY4;E9PEM9;hsa:2946;P28161;Q2M318;Q5TZY5;Q8WWE1
1577670	1696340	3386710	32729,3	31502,6	22951,3	FALSE		2,41E+17	NaN	NaN	NaN	0	45,452	56	10	26	10	243	26,7	9,66	2706,45	34,56	8	10	P23396	40S ribosomal protein S3 OS=Homo sapiens OX=9606 GN=RPS3 PE=1 SV=2	0	Pf00189, Pf07650	6188	ENSG00000149273	RPS3	B2R7N5;hsa:6188;J3KN86;P23396;Q498B5;Q8NI95
552996	107370	410088	2306500	2078820	214430	FALSE		1,22E+18	NaN	NaN	NaN	0	45,441	12	9	58	9	981	112,3	5,22	6471,77	57,94	9	9	Q9Y4E8	Ubiquitin carboxyl-terminal hydrolase 15 OS=Homo sapiens OX=9606 GN=USP15 PE=1 SV=3	0	Pf00443, Pf06337, Pf14533, Pf14836	9958	ENSG00000135655	USP15	hsa:9958;Q08AL5;Q9H8G9;Q9HCA6;Q9UNP0;Q9Y4E8;Q9Y5B5
1380890	392280	1707710	66281,4	NaN	22765,5	FALSE		-1,08E+18	NaN	NaN	NaN	0	45,384	15	7	24	7	775	85	7,17	3270,17	38,38	4	7	Q96PD2	Discoidin, CUB and LCCL domain-containing protein 2 OS=Homo sapiens OX=9606 GN=DCBLD2 PE=1 SV=1	0	Pf00431, Pf00754, Pf03815	131566	ENSG00000057019	DCBLD2	B7WNL1;D3DN41;hsa:131566;Q8N6M4;Q8TDX2;Q96PD2
220022	119756	270870	2137600	2774310	278619	FALSE		-4,91E+18	NaN	NaN	NaN	0	45,362	24	11	63	11	505	54,4	7,65	5623,01	62,25	10	11	P50995	Annexin A11 OS=Homo sapiens OX=9606 GN=ANXA11 PE=1 SV=1	0	Pf00191	311	ENSG00000122359	ANXA11	B4DVE7;hsa:311;P50995
1464830	797490	1604850	161970	96827,2	NaN	FALSE	Acetyl [N-Term];Met-loss+Acetyl [N-Term]	3,1E+18	NaN	NaN	NaN	0	45,189	31	9	28	9	357	38,3	7,97	2758,85	29,63	7	8	Q00796	Sorbitol dehydrogenase OS=Homo sapiens OX=9606 GN=SORD PE=1 SV=4	0	Pf00107, Pf08240	6652	ENSG00000140263	SORD	B2R655;B7Z3A6;hsa:6652;J3JZZ5;Q00796;Q16682;Q9UMD6
2822240	439556	1796410	779021	483846	159214	FALSE		2,76E+18	NaN	NaN	NaN	0	45,152	41	6	32	6	257	26,9	11,15	2686,08	63,25	2	6	Q86V81	THO complex subunit 4 OS=Homo sapiens OX=9606 GN=ALYREF PE=1 SV=3	0	Pf00076, Pf13865	10189		ALYREF	hsa:10189;O43672;Q86V81
636,563	NaN	NaN	1183260	2367500	277647	FALSE		-2,96E+18	NaN	NaN	NaN	0	45,127	6	10	23	10	2419	279,8	5,05	1589,26	20,74	6	10	P02549	Spectrin alpha chain, erythrocytic 1 OS=Homo sapiens OX=9606 GN=SPTA1 PE=1 SV=5	0	Pf00018, Pf00435, Pf08726	6708	ENSG00000163554	SPTA1	hsa:6708;P02549;Q15514;Q5VYL1;Q5VYL2;Q6LDY5
1340380	711657	2570700	35492,5	28223,6	2296,98	FALSE		9,65E+17	NaN	NaN	NaN	0	45,093	27	7	36	7	456	50,2	6,42	4891,29	45,88	5	7	Q9Y265	RuvB-like 1 OS=Homo sapiens OX=9606 GN=RUVBL1 PE=1 SV=1	0	Pf06068, Pf17856	8607	ENSG00000175792;ENSG00000284901	RUVBL1	B2R5S0;hsa:8607;P82276;Q1KMR0;Q53HK5;Q53HL7;Q53Y27;Q9BSX9;Q9Y265
40783800	52072500	58388400	59602	NaN	NaN	FALSE	Acetyl [N-Term]	7,44E+18	NaN	NaN	NaN	0	45,089	67	4	26	1	61	6	7,83	208,07	102,78	1	4	P02795	Metallothionein-2 OS=Homo sapiens OX=9606 GN=MT2A PE=1 SV=1	1	Pf00131	4502	ENSG00000125148	MT2A	hsa:4502;P02795;Q14823;Q2HXR9;Q53XT9
572328	1039120	2312700	475,688	NaN	NaN	FALSE		-2,9E+18	NaN	NaN	NaN	0	45,015	9	9	36	9	1791	198,4	5,47	3187,54	32,05	6	9	Q9BXP8	Pappalysin-2 OS=Homo sapiens OX=9606 GN=PAPPA2 PE=1 SV=4	0	Pf00066, Pf00084, Pf05572, Pf13385	60676	ENSG00000116183	PAPPA2	A9Z1Y8;hsa:60676;Q96PH7;Q96PH8;Q9BXP8;Q9H4C9
592280	210588	354967	5221600	4625120	1020380	FALSE		-5,8E+18	NaN	NaN	NaN	0	45,003	49	9	62	9	181	21,2	7,49	6463,78	65,43	8	9	O43665	Regulator of G-protein signaling 10 OS=Homo sapiens OX=9606 GN=RGS10 PE=1 SV=3	0	Pf00615	6001	ENSG00000148908	RGS10	A8K408;B1AMR8;hsa:6001;O43665;Q6IAZ6;Q96GN0
2600070	652863	2595260	2518470	3141500	404058	FALSE		-2,74E+17	NaN	NaN	NaN	0	44,98	49	4	68	4	142	15,6	9,13	6786,14	86,89	3	4	P26885	Peptidyl-prolyl cis-trans isomerase FKBP2 OS=Homo sapiens OX=9606 GN=FKBP2 PE=1 SV=2	0	Pf00254	2286	ENSG00000173486	FKBP2	hsa:2286;P26885;Q5BJH9;Q9BTS7
NaN	132365	NaN	194967	516830	30904,7	FALSE		-7,53E+18	NaN	NaN	NaN	0	44,968	51	6	202	1	126	13,9	10,32	14314,7	79,52	5	6	Q16778	Histone H2B type 2-E OS=Homo sapiens OX=9606 GN=H2BC21 PE=1 SV=3	0	Pf00125	8349	ENSG00000184678	H2BC21	A3KMC7;A8K110;hsa:8349;Q16778;Q4KMY1;Q5QNX0;Q9UE88
186738	48551,5	241683	15335,1	13347,9	NaN	FALSE		2,36E+18	NaN	NaN	NaN	0	44,911	51	8	53	1	193	22	6,58	5265,15	59,27	5	8	P08134	Rho-related GTP-binding protein RhoC OS=Homo sapiens OX=9606 GN=RHOC PE=1 SV=1	0	Pf00071	389	ENSG00000155366	RHOC	B3KSW1;hsa:389;P08134;Q6ICN3
3146770	433557	2511910	10748,6	NaN	9351,89	FALSE		-7,94E+18	NaN	NaN	NaN	0	44,817	32	7	28	7	354	39,4	7,23	2992,31	53,88	4	7	O43570	Carbonic anhydrase 12 OS=Homo sapiens OX=9606 GN=CA12 PE=1 SV=1	0	Pf00194	771	ENSG00000074410	CA12	B2RE24;hsa:771;O43570;Q53YE5;Q9BWG2
2085120	674259	8520300	952073	1033990	1409520	FALSE		4,64E+18	NaN	NaN	NaN	0	44,787	24	8	43	8	501	57,1	6,55	5042,67	43,7	6	8	P14868	Aspartate--tRNA ligase, cytoplasmic OS=Homo sapiens OX=9606 GN=DARS1 PE=1 SV=2	0	Pf00152, Pf01336	1615	ENSG00000115866	DARS1	A8K3J2;D3DP77;hsa:1615;P14868;Q2TNI3;Q32Q69;Q53HV4;Q53YC5;Q68CR9;Q9BW52
2643880	1939010	2543160	1001500	1564200	29894,6	FALSE		-7,92E+18	NaN	NaN	NaN	0	44,763	54	7	45	7	160	18	5,01	4218,44	83,47	3	7	Q9NWV4	CXXC motif containing zinc binding protein OS=Homo sapiens OX=9606 GN=CZIB PE=1 SV=1	0	Pf05907	54987	ENSG00000162384	CZIB	hsa:54987;Q9NWV4
295984	4457,41	537764	152190	298812	NaN	FALSE		5,48E+18	NaN	NaN	NaN	0	44,623	27	7	58	2	366	40,6	6,04	5930,6	101,64	6	7	P10321	HLA class I histocompatibility antigen, C alpha chain OS=Homo sapiens OX=9606 GN=HLA-C PE=1 SV=3	0	Pf00129, Pf06623, Pf07654	3107	ENSG00000204525	HLA-C	hsa:3107;O02863;O02864;O02865;O02866;O02958;O19505;O19652;O19676;O62879;O62882;O62883;O62888;O78060;O78061;O78062;O78063;O78067;O78068;O78069;O78072;O78083;O78090;O78091;O78149;O78165;O78166;O78178;O78202;O78203;O78211;O78214;P04222;P10321;P30499;P30500;P30501;P30502;P30503;P30504;P30505;P30506;P30507;P30508;P30509;P30510;P79498;Q07000;Q29631;Q29641;Q29643;Q29652;Q29743;Q29768;Q29862;Q29864;Q2986…
235710	1864370	854324	38395,5	34884,5	13130,7	FALSE		-7,89E+18	NaN	NaN	NaN	0	44,615	30	7	20	7	325	36,5	5,64	2290,53	28,23	6	7	Q13347	Eukaryotic translation initiation factor 3 subunit I OS=Homo sapiens OX=9606 GN=EIF3I PE=1 SV=1	0	Pf00400	8668	ENSG00000084623	EIF3I	hsa:8668;Q13347
8461280	6427820	9073030	268383	621102	113677	FALSE	Acetyl [N-Term];Met-loss+Acetyl [N-Term]	-4,64E+18	NaN	NaN	NaN	0	44,576	25	10	42	10	391	42,3	10,05	4989,52	43,41	9	9	P38159	RNA-binding motif protein, X chromosome OS=Homo sapiens OX=9606 GN=RBMX PE=1 SV=3	0	Pf00076, Pf08081	27316	ENSG00000147274	RBMX	B4E3U4;D3DWH0;E9PG86;hsa:27316;P38159;Q5JQ67;Q8N8Y7;Q969R3
915125	NaN	1508860	5000720	3386640	NaN	FALSE		-6,31E+17	NaN	NaN	NaN	0	44,562	42	5	47	5	195	22	5,44	4729,08	65,17	4	5	P55957	BH3-interacting domain death agonist OS=Homo sapiens OX=9606 GN=BID PE=1 SV=1	0	Pf06393	637	ENSG00000015475	BID	hsa:637;P55957;Q549M7;Q71T04;Q7Z4M9;Q8IY86
NaN	2585,27	605568	41597700	28155800	2776210	FALSE		-5,8E+17	NaN	NaN	NaN	0	44,524	38	8	38	8	170	19,3	9,41	4049,79	47,8	7	8	P49913	Cathelicidin antimicrobial peptide OS=Homo sapiens OX=9606 GN=CAMP PE=1 SV=1	0	Pf00666, Pf12153	820	ENSG00000164047	CAMP	hsa:820;P49913;Q71SN9
1074810	275651	1217430	3682980	2859800	891469	FALSE		-4,95E+18	NaN	NaN	NaN	0	44,519	38	9	54	9	308	33,4	5,69	5585,33	62,65	6	9	O95861	3'(2'),5'-bisphosphate nucleotidase 1 OS=Homo sapiens OX=9606 GN=BPNT1 PE=1 SV=1	0	Pf00459	10380	ENSG00000162813	BPNT1	A8K7C8;B4DPS5;B4DUS9;D3DTA9;hsa:10380;O95861;Q8WVL5;Q9UGJ3
138722	159529	242017	5525490	3137910	2179880	FALSE		-5,36E+18	NaN	NaN	NaN	0	44,477	14	14	58	14	1306	147,4	6,15	4158,25	30,27	10	13	P08575	Receptor-type tyrosine-protein phosphatase C OS=Homo sapiens OX=9606 GN=PTPRC PE=1 SV=3	0	Pf00041, Pf00102, Pf12453, Pf12567	5788	ENSG00000081237;ENSG00000262418	PTPRC	A0A0A0MT22;A8K7W6;hsa:5788;P08575;Q16614;Q9H0Y6;X6R433
250820	115055	49046,8	1587010	3502520	141455	FALSE		-4,65E+17	NaN	NaN	NaN	0	44,448	28	12	65	9	380	42,9	6,95	6202,03	45,24	12	12	O43639	Cytoplasmic protein NCK2 OS=Homo sapiens OX=9606 GN=NCK2 PE=1 SV=2	3	Pf00017, Pf00018, Pf14604	8440	ENSG00000071051	NCK2	D3DVK1;hsa:8440;O43639;Q9BWN9;Q9UIC3
13067500	6545200	26552100	3620150	5951620	12474700	TRUE		1,26E+18	NaN	NaN	NaN	0	44,409	27	9	39	5	486	53,5	5,66	3870,56	36,89	8	9	O43790	Keratin, type II cuticular Hb6 OS=Homo sapiens OX=9606 GN=KRT86 PE=1 SV=1	3	Pf00038, Pf16208	3892	ENSG00000170442	KRT86	hsa:3892;O43790;P78387
890216	764702	799332	1933650	2513350	114896	FALSE		-1,69E+16	NaN	NaN	NaN	0	44,395	49	9	44	9	207	23,5	6,7	4545,05	49,59	8	9	P51149	Ras-related protein Rab-7a OS=Homo sapiens OX=9606 GN=RAB7A PE=1 SV=1	0	Pf00071	7879	ENSG00000075785	RAB7A	A8K3V6;hsa:7879;P51149;Q9NWJ0;Q9UPB0
2128960	1045690	2116080	6032,51	2889,87	3140,96	FALSE		3,87E+18	NaN	NaN	NaN	0	44,387	29	10	33	10	574	63,3	7,03	3324,27	33	6	10	P21589	5'-nucleotidase OS=Homo sapiens OX=9606 GN=NT5E PE=1 SV=1	0	Pf00149, Pf02872	4907	ENSG00000135318	NT5E	B3KQI8;hsa:4907;O75520;P21589;Q5W116
2106840	263729	1612580	537410	187336	67126	FALSE	Acetyl [N-Term];Met-loss+Acetyl [N-Term]	-8,79E+18	NaN	NaN	NaN	0	44,363	40	6	21	6	248	27,6	5,3	2446,62	39,64	3	5	Q2TAA2	Isoamyl acetate-hydrolyzing esterase 1 homolog OS=Homo sapiens OX=9606 GN=IAH1 PE=1 SV=1	0	Pf13472	285148	ENSG00000134330	IAH1	B4DMV3;hsa:285148;Q2TAA2
1980750	3104580	1567390	1398100	760666	171238	FALSE		3,21E+18	NaN	NaN	NaN	0	44,363	52	7	59	7	210	22,3	6,4	2938,92	83,31	5	7	Q96IU4	Putative protein-lysine deacylase ABHD14B OS=Homo sapiens OX=9606 GN=ABHD14B PE=1 SV=1	0	Pf12697	84836	ENSG00000114779	ABHD14B	hsa:84836;Q86VK8;Q8N8W5;Q96IU4
1387950	2142610	1669230	125135	81306,3	34542,5	FALSE		3,97E+18	NaN	NaN	NaN	0	44,356	45	10	29	10	264	29,9	9,73	3064,46	27,23	9	10	P61247	40S ribosomal protein S3a OS=Homo sapiens OX=9606 GN=RPS3A PE=1 SV=2	0	Pf01015	6189	ENSG00000145425	RPS3A	B2R4D4;D3DP05;hsa:6189;P33443;P49241;P61247
3584390	370944	5296350	6929470	4704700	579838	FALSE		7,17E+18	NaN	NaN	NaN	0	44,351	70	8	65	8	152	17,1	6,57	6758,48	85,55	5	8	P61088	Ubiquitin-conjugating enzyme E2 N OS=Homo sapiens OX=9606 GN=UBE2N PE=1 SV=1	0	Pf00179	7334	ENSG00000177889	UBE2N	hsa:7334;P61088;Q16781;Q53Y81
1261780	896317	1640330	142132	101541	17601,5	FALSE		-1,09E+17	NaN	NaN	NaN	0	44,232	16	9	42	9	573	65,3	6,2	3542,04	37,3	7	9	Q07866	Kinesin light chain 1 OS=Homo sapiens OX=9606 GN=KLC1 PE=1 SV=2	0	Pf00515, Pf13374, Pf13424	3831	ENSG00000126214	KLC1	A6NF62;F8VTM4;hsa:3831;Q07866;Q7RTM2;Q7RTM3;Q7RTM5;Q7RTP9;Q7RTQ3;Q7RTQ5;Q7RTQ6;Q86SF5;Q86TF5;Q86V74;Q86V75;Q86V76;Q86V77;Q86V78;Q86V79;Q96H62
NaN	13240,6	NaN	3422,28	NaN	45968,5	FALSE		3,65E+17	NaN	NaN	NaN	0	44,191	52	7	217	1	126	13,9	10,32	15460,9	94,08	6	7	Q99880	Histone H2B type 1-L OS=Homo sapiens OX=9606 GN=H2BC13 PE=1 SV=3	0	Pf00125	8340	ENSG00000185130	H2BC13	B2R5A3;hsa:8340;Q52LW9;Q99880
1388320	3078490	1192870	14402,6	130625	43560,3	FALSE		-2,65E+18	NaN	NaN	NaN	0	44,097	30	5	37	5	333	37,5	5,45	4383,92	41,07	4	5	P07711	Procathepsin L OS=Homo sapiens OX=9606 GN=CTSL PE=1 SV=2	0	Pf00112, Pf08246	1514	ENSG00000135047	CTSL	hsa:1514;P07711;Q6IAV1;Q96QJ0
3202960	903023	2572280	983247	393440	50262,2	FALSE	Acetyl [N-Term];Met-loss+Acetyl [N-Term]	7,64E+18	NaN	NaN	NaN	0	44,031	20	7	36	7	524	58	5,96	3315,34	62,33	5	6	Q13177	Serine/threonine-protein kinase PAK 2 OS=Homo sapiens OX=9606 GN=PAK2 PE=1 SV=3	0	Pf00069, Pf00786	5062	ENSG00000180370	PAK2	hsa:5062;Q13154;Q13177;Q6ISC3
230363	NaN	743628	3323050	3046230	925986	FALSE		-7,34E+18	NaN	NaN	NaN	0	44,028	28	8	38	8	299	32,6	7,9	3428,96	51,01	6	8	Q9Y624	Junctional adhesion molecule A OS=Homo sapiens OX=9606 GN=F11R PE=1 SV=1	0	Pf07686, Pf13927	50848	ENSG00000158769	F11R	B7Z941;hsa:50848;Q9Y624
3587230	811591	2154320	60153000	77234000	4900870	FALSE		8,2E+18	NaN	NaN	NaN	0	43,962	63	6	98	4	117	12,6	8,28	10678,3	115,46	4	6	P01764	Immunoglobulin heavy variable 3-23 OS=Homo sapiens OX=9606 GN=IGHV3-23 PE=1 SV=2	3	Pf07686		ENSG00000211949;ENSG00000281962	IGHV3-23	A0A087WSX3;P01764;P01765;P01774;P01775;P01776;P01777;P01778;P01779
2273370	1500100	4864320	6126,65	NaN	NaN	FALSE		3,54E+18	NaN	NaN	NaN	0	43,85	38	11	31	11	376	42,9	5,81	2792,76	33,96	9	11	Q9UNM6	26S proteasome non-ATPase regulatory subunit 13 OS=Homo sapiens OX=9606 GN=PSMD13 PE=1 SV=2	0	Pf01399	5719	ENSG00000185627	PSMD13	B3KT15;hsa:5719;O75831;Q53XU2;Q9UNM6;Q9UNV3
5709850	614316	4159350	375544	66730,8	NaN	FALSE		-5,59E+18	NaN	NaN	NaN	0	43,764	25	8	40	8	453	48,7	8,95	3650,88	53,01	5	8	P36957	Dihydrolipoyllysine-residue succinyltransferase component of 2-oxoglutarate dehydrogenase complex, mitochondrial OS=Homo sapiens OX=9606 GN=DLST PE=1 SV=4	0	Pf00198, Pf00364	1743	ENSG00000119689	DLST	B7Z5W8;E7ESY5;hsa:1743;P36957;Q7LDY7;Q9BQ32
2651540	1634880	3208120	1384690	1650150	303390	FALSE		5,64E+18	NaN	NaN	NaN	0	43,608	57	8	70	8	172	18,8	5,69	6579,65	79,4	6	8	Q9UMX5	Neudesin OS=Homo sapiens OX=9606 GN=NENF PE=1 SV=1	0	Pf00173	29937	ENSG00000117691	NENF	A1KYQ8;hsa:29937;Q53FZ6;Q5TM90;Q9UMX5
7892300	1463670	6959820	13617200	11897000	2044900	FALSE		1,13E+18	NaN	NaN	NaN	0	43,592	79	11	84	5	147	16,5	7,93	7658,97	87,78	9	11	Q13404	Ubiquitin-conjugating enzyme E2 variant 1 OS=Homo sapiens OX=9606 GN=UBE2V1 PE=1 SV=2	6	Pf00179	387522;7335	ENSG00000244687	UBE2V1	E1P629;hsa:387522;hsa:7335;Q13403;Q13404;Q13532;Q5TGE0;Q5TGE3;Q96H34;Q9GZT0;Q9GZW1;Q9H4J3;Q9H4J4;Q9UKL1;Q9UM48;Q9UM49;Q9UM50
31827,1	312347	71789	265525	562021	339068	TRUE		8,74E+18	NaN	NaN	NaN	0	43,591	20	12	54	8	590	62,3	7,74	5542,51	52,95	11	12	P13647	Keratin, type II cytoskeletal 5 OS=Homo sapiens OX=9606 GN=KRT5 PE=1 SV=3	0	Pf00038, Pf16208	3852	ENSG00000186081	KRT5	hsa:3852;P13647;Q6PI71;Q6UBJ0;Q8TA91
3918050	478647	5526050	2365810	2826190	217362	FALSE		6,55E+18	NaN	NaN	NaN	0	43,578	49	7	63	7	182	20,6	4,92	7998,1	90,11	7	7	Q9Y2B0	Protein canopy homolog 2 OS=Homo sapiens OX=9606 GN=CNPY2 PE=1 SV=1	0	Pf11938	10330	ENSG00000257727	CNPY2	B2R7B9;hsa:10330;Q9UHE9;Q9Y2B0
1904220	709556	1686420	2270730	440859	157666	FALSE		8,65E+18	NaN	NaN	NaN	0	43,496	38	8	51	8	326	36,1	9,17	5119,89	49,15	7	8	Q15717	ELAV-like protein 1 OS=Homo sapiens OX=9606 GN=ELAVL1 PE=1 SV=2	0	Pf00076	1994	ENSG00000066044	ELAVL1	B4DVB8;hsa:1994;Q15717;Q53XN6;Q9BTT1
25393900	2296850	50542300	12875,8	208526	64592,8	FALSE		2,12E+17	NaN	NaN	NaN	0	43,483	31	7	36	7	277	31,2	6,79	4299,09	37,39	7	7	P98066	Tumor necrosis factor-inducible gene 6 protein OS=Homo sapiens OX=9606 GN=TNFAIP6 PE=1 SV=2	0	Pf00193, Pf00431	7130	ENSG00000123610	TNFAIP6	hsa:7130;P98066;Q53TI7;Q8WWI9
239659	199219	251418	2425430	5030700	24209,8	FALSE	Acetyl [N-Term];Met-loss+Acetyl [N-Term]	-9,02E+18	NaN	NaN	NaN	0	43,31	63	7	55	5	142	16,8	5,26	3852,44	66,66	5	6	O60234	Glia maturation factor gamma OS=Homo sapiens OX=9606 GN=GMFG PE=1 SV=1	0	Pf00241	9535	ENSG00000130755	GMFG	hsa:9535;O60234;Q6IB37
2721390	1148480	2934800	NaN	NaN	NaN	FALSE		2,45E+18	NaN	NaN	NaN	0	43,308	51	6	25	6	190	20,1	9,26	2073,57	40,65	4	6	Q9H910	Jupiter microtubule associated homolog 2 OS=Homo sapiens OX=9606 GN=JPT2 PE=1 SV=1	0	Pf17054	90861	ENSG00000206053	JPT2	B1AJY2;B4DLH4;hsa:90861;Q6EIC7;Q9H910
279942	872918	207645	36202,6	38111,9	NaN	TRUE		-7,79E+18	NaN	NaN	NaN	0	43,082	14	8	35	6	760	85,4	7,94	3770,8	49,91	6	7	Q3KUS7	TREMBL:Q3KUS7 (Bos taurus) Complement factor B	0
362283	316747	621752	5070170	6274070	89045,1	FALSE		-3,38E+18	NaN	NaN	NaN	0	43,028	26	9	34	9	358	38,8	5,77	3503,32	31,93	8	9	O14745	Na(+)/H(+) exchange regulatory cofactor NHE-RF1 OS=Homo sapiens OX=9606 GN=SLC9A3R1 PE=1 SV=4	0	Pf00595, Pf09007	9368	ENSG00000109062	SLC9A3R1	B3KY21;hsa:9368;O14745;O43552;Q86WQ5
1932050	305463	1541020	361792	290818	NaN	FALSE	Met-loss [N-Term]	4,92E+18	NaN	NaN	NaN	0	42,987	38	7	28	7	260	29,9	5,73	3507,56	38,69	5	6	Q8WXX5	DnaJ homolog subfamily C member 9 OS=Homo sapiens OX=9606 GN=DNAJC9 PE=1 SV=1	0	Pf00226	23234	ENSG00000213551	DNAJC9	B2RMW6;hsa:23234;Q8WXX5
191144	2201,94	82328,9	2891680	1790500	385935	FALSE		-5,44E+18	NaN	NaN	NaN	0	42,898	8	8	43	8	1052	119,2	6,62	4654,35	39,89	8	8	Q05397	Focal adhesion kinase 1 OS=Homo sapiens OX=9606 GN=PTK2 PE=1 SV=2	0	Pf00373, Pf03623, Pf07714, Pf18038	5747	ENSG00000169398	PTK2	B4E2N6;F5H4S4;hsa:5747;J3QT16;Q05397;Q14291;Q8IYN9;Q9UD85
7504140	474905	4536020	44153,6	31905,4	3128,36	FALSE		-8,99E+18	NaN	NaN	NaN	0	42,875	31	5	25	5	197	22,6	7,11	3047,76	39,74	4	5	P61758	Prefoldin subunit 3 OS=Homo sapiens OX=9606 GN=VBP1 PE=1 SV=4	0	Pf02996	7411	ENSG00000155959	VBP1	B2R8L5;B4DWR3;F5H2A7;hsa:7411;O55228;P61758;Q15765;Q5JT81;Q86X96
1707710	1027560	2645590	392589	335398	63552,8	FALSE		3,42E+18	NaN	NaN	NaN	0	42,848	14	12	32	12	1249	138,3	6,32	1652,37	35,31	8	12	P29144	Tripeptidyl-peptidase 2 OS=Homo sapiens OX=9606 GN=TPP2 PE=1 SV=4	0	Pf00082, Pf12580	7174	ENSG00000134900	TPP2	hsa:7174;P29144;Q5VZU8
10007800	2725420	3403430	78120300	37773200	11520700	FALSE		-9,09E+17	NaN	NaN	NaN	0	42,792	49	7	117	7	101	11,7	6,11	12250,7	115,69	7	7	P26447	Protein S100-A4 OS=Homo sapiens OX=9606 GN=S100A4 PE=1 SV=1	0	Pf01023	6275	ENSG00000196154	S100A4	A8K7R8;D3DV46;hsa:6275;P26447;Q6ICP8
1250300	1290670	689481	978496	860163	655798	FALSE		5,63E+18	NaN	NaN	NaN	0	42,754	38	8	43	8	297	33,2	6,6	2994,53	59,35	7	8	P25325	3-mercaptopyruvate sulfurtransferase OS=Homo sapiens OX=9606 GN=MPST PE=1 SV=3	0	Pf00581	4357	ENSG00000128309	MPST	A8MZ34;B3KP52;hsa:4357;J3KPV7;O75750;P25325;Q6FHN9
14801900	29821400	30767800	7496920	6555700	1081740	FALSE	Acetyl [N-Term];Met-loss+Acetyl [N-Term]	1,61E+18	NaN	NaN	NaN	0	42,722	31	5	49	4	103	11,6	5,49	5639,96	73,77	4	4	P55854	Small ubiquitin-related modifier 3 OS=Homo sapiens OX=9606 GN=SUMO3 PE=1 SV=2	1	Pf11976	6612	ENSG00000184900	SUMO3	B2R5X4;B4DUW4;hsa:6612;P55854;Q53HI9;Q6FGD4;Q9BWR4
1000880	551172	1419530	187804	253199	23233,5	FALSE		-8,5E+18	NaN	NaN	NaN	0	42,699	58	8	57	3	205	22,7	6,21	5530,78	64,93	7	8	P62820	Ras-related protein Rab-1A OS=Homo sapiens OX=9606 GN=RAB1A PE=1 SV=3	0	Pf00071	5861	ENSG00000138069	RAB1A	hsa:5861;P11476;P62820;Q6FIE7;Q96N61;Q9Y3T2
1110630	3555180	1189160	NaN	NaN	7138,77	FALSE		4,57E+18	NaN	NaN	NaN	0	42,589	16	5	15	5	373	41,3	7,99	775,61	30,02	3	4	Q9H6B4	CXADR-like membrane protein OS=Homo sapiens OX=9606 GN=CLMP PE=1 SV=1	0	Pf07686, Pf13895	79827	ENSG00000166250	CLMP	hsa:79827;Q9H6B4
2122800	598956	4020430	233767	162675	NaN	FALSE		-4,57E+18	NaN	NaN	NaN	0	42,555	27	5	28	5	215	23,4	4,56	4389,11	36,23	5	5	Q13765	Nascent polypeptide-associated complex subunit alpha OS=Homo sapiens OX=9606 GN=NACA PE=1 SV=1	0	Pf01849, Pf19026	4666	ENSG00000196531	NACA	A8MTN7;B2R4P8;F8VU71;hsa:4666;Q13765;Q3KQV4;Q53A18;Q53G46
1880000	1797050	1998410	40191500	70925100	7180010	FALSE		-2,24E+18	NaN	NaN	NaN	0	42,545	57	7	98	4	117	12,9	6,57	9602,35	137,28	6	7	P01780	Immunoglobulin heavy variable 3-7 OS=Homo sapiens OX=9606 GN=IGHV3-7 PE=1 SV=2	3	Pf07686		ENSG00000211938;ENSG00000282211	IGHV3-7	A0A0B4J1U8;P01780;P01781;P80419
699180	537868	921921	3733400	5030380	2921900	FALSE	Acetyl [N-Term];Met-loss+Acetyl [N-Term]	5,6E+18	NaN	NaN	NaN	0	42,431	33	7	65	7	262	29,4	6,96	6014,54	69,52	6	6	Q8N1Q1	Carbonic anhydrase 13 OS=Homo sapiens OX=9606 GN=CA13 PE=1 SV=1	0	Pf00194	377677	ENSG00000185015	CA13	hsa:377677;Q8N1Q1
1142320	379751	1057220	1202280	1261800	NaN	FALSE		-6,99E+18	NaN	NaN	NaN	0	42,419	13	7	32	7	913	101,3	5,45	3262,17	43,96	4	7	Q5JSH3	WD repeat-containing protein 44 OS=Homo sapiens OX=9606 GN=WDR44 PE=1 SV=1	0	Pf00400	54521	ENSG00000131725	WDR44	B4DSE9;F8W913;hsa:54521;Q0JS52;Q0JTF3;Q5JSH2;Q5JSH3;Q6ZSC1;Q7Z365;Q7Z3P6;Q8NAU8;Q8NHU5;Q9NUV4
9398870	2841430	4115840	NaN	NaN	15040,7	FALSE	Acetyl [N-Term];Met-loss+Acetyl [N-Term]	-2,81E+18	NaN	NaN	NaN	0	42,397	52	7	30	7	103	11,8	6,79	3331,56	45,17	4	6	Q96FQ6	Protein S100-A16 OS=Homo sapiens OX=9606 GN=S100A16 PE=1 SV=1	0	Pf01023	140576	ENSG00000188643	S100A16	A8K439;D3DV52;hsa:140576;Q5RHS6;Q96FQ6
1172250	77368,8	932424	16975,8	3989,74	24641,9	FALSE		-7,64E+18	NaN	NaN	NaN	0	42,329	7	7	29	7	1972	213,4	4,7	2937,24	40,24	4	7	Q12888	TP53-binding protein 1 OS=Homo sapiens OX=9606 GN=TP53BP1 PE=1 SV=2	0	Pf09038, Pf18428	7158	ENSG00000067369	TP53BP1	F8VY86;hsa:7158;Q12888;Q2M1Z7;Q4LE46;Q5FWZ3;Q7Z3U4
2102260	3283320	3455590	150321	12581,5	NaN	FALSE		2,61E+18	NaN	NaN	NaN	0	42,309	25	11	36	11	589	64,1	8,22	2837,02	51,78	7	11	P14866	Heterogeneous nuclear ribonucleoprotein L OS=Homo sapiens OX=9606 GN=HNRNPL PE=1 SV=2	0	Pf00076, Pf11835, Pf13893	3191	ENSG00000104824;ENSG00000282947	HNRNPL	A6ND69;A6NIT8;hsa:3191;P14866;Q9H3P3
3818750	4160680	5277100	311457	248332	144637	FALSE	Acetyl [N-Term];Met-loss+Acetyl [N-Term]	-3,62E+18	NaN	NaN	NaN	0	42,122	62	8	37	8	154	17,3	6,33	5631,92	57,22	7	7	Q99471	Prefoldin subunit 5 OS=Homo sapiens OX=9606 GN=PFDN5 PE=1 SV=2	0	Pf02996	5204	ENSG00000123349	PFDN5	A8K9A8;hsa:5204;Q54AA8;Q99471;Q9C083;Q9C084
250881	64325,2	239992	4200190	8191330	147370	FALSE		-3,18E+18	NaN	NaN	NaN	0	42,12	40	8	38	8	248	26,1	5,49	3977,13	46,44	7	8	P11226	Mannose-binding protein C OS=Homo sapiens OX=9606 GN=MBL2 PE=1 SV=2	0	Pf00059, Pf01391	4153	ENSG00000165471	MBL2	hsa:4153;P11226;Q4VB12;Q4VB13;Q4VB14;Q5SQS3;Q86SI4;Q96KE4;Q96TF7;Q96TF8;Q96TF9
297942	NaN	63634,9	295371	466554	NaN	FALSE		4,76E+18	NaN	NaN	NaN	0	42,002	43	5	75	1	136	15,4	11,27	5315,68	74,72	4	5	Q71DI3	Histone H3.2 OS=Homo sapiens OX=9606 GN=H3C13 PE=1 SV=3	0	Pf00125	126961;333932;653604	ENSG00000183598;ENSG00000203811;ENSG00000203852	H3C13;H3C14;H3C15	A2BDF6;A6NFS4;hsa:126961;hsa:333932;hsa:653604;Q6B053;Q71DI3
391168	1406940	770228	141452	340960	60756,2	FALSE		-6,39E+18	NaN	NaN	NaN	0	41,904	30	8	20	8	504	57,5	6,15	1859,51	20,07	4	8	Q13217	DnaJ homolog subfamily C member 3 OS=Homo sapiens OX=9606 GN=DNAJC3 PE=1 SV=1	0	Pf00226, Pf00515, Pf13181, Pf13432	5611	ENSG00000102580	DNAJC3	hsa:5611;Q13217;Q86WT9;Q8N4N2
2436030	6975,38	2085480	126376	48668,6	19684,3	FALSE		-6,27E+18	NaN	NaN	NaN	0	41,84	37	6	24	6	367	40,8	6,14	1645,78	52,21	2	6	P06132	Uroporphyrinogen decarboxylase OS=Homo sapiens OX=9606 GN=UROD PE=1 SV=2	0	Pf01208	7389	ENSG00000126088	UROD	A8K762;hsa:7389;P06132;Q16863;Q16883;Q53YB8;Q53ZP6;Q6IB28;Q9BUZ0
2185960	2777370	8088970	731877	1144320	123362	FALSE		-6,9E+18	NaN	NaN	NaN	0	41,809	37	7	41	7	290	33,5	4,32	4487,91	76,9	4	7	Q01105	Protein SET OS=Homo sapiens OX=9606 GN=SET PE=1 SV=3	0	Pf00956	6418	ENSG00000119335	SET	A5A5H4;A6NGV1;B4DUE2;hsa:6418;Q01105;Q15541;Q5VXV1;Q5VXV2;Q6FHZ5
45857,1	15837	NaN	9884920	6073760	310271	FALSE		-7,8E+18	NaN	NaN	NaN	0	41,766	21	7	47	7	339	36,8	9,2	6359,17	67,23	7	7	Q9HCN6	Platelet glycoprotein VI OS=Homo sapiens OX=9606 GN=GP6 PE=1 SV=4	0	Pf13895	51206	ENSG00000088053;ENSG00000277439	GP6	hsa:51206;Q9HCN6;Q9HCN7;Q9UIF2
2214520	1085900	3282920	397089	711567	140653	FALSE		-8,72E+18	NaN	NaN	NaN	0	41,764	13	9	20	9	1052	117,7	8,75	1702,6	19,8	4	9	Q14703	Membrane-bound transcription factor site-1 protease OS=Homo sapiens OX=9606 GN=MBTPS1 PE=1 SV=1	0	Pf00082	8720	ENSG00000140943	MBTPS1	A8K6V8;hsa:8720;Q14703;Q24JQ2;Q9UF67
3495900	2433520	9948350	8658,89	8432,02	1515,69	FALSE		-4,36E+18	NaN	NaN	NaN	0	41,658	6	4	48	4	819	90,5	7,52	4806,21	53,98	4	4	Q13443	Disintegrin and metalloproteinase domain-containing protein 9 OS=Homo sapiens OX=9606 GN=ADAM9 PE=1 SV=1	0	Pf00200, Pf01421, Pf01562, Pf08516	8754	ENSG00000168615	ADAM9	B7ZLN7;hsa:8754;Q10718;Q13443;Q8NFM6
NaN	NaN	NaN	4343280	465300	754784	FALSE		-6,84E+18	NaN	NaN	NaN	0	41,578	25	8	22	8	487	53,9	9,38	1745,88	24,2	6	8	P17213	Bactericidal permeability-increasing protein OS=Homo sapiens OX=9606 GN=BPI PE=1 SV=4	0	Pf01273, Pf02886	671	ENSG00000101425	BPI	B2RCY2;hsa:671;P17213;Q1ZZU8;Q5JRW0;Q8IW58;Q9BYZ9;Q9H1L2;Q9H1M8;Q9H203;Q9UCT4;Q9UD65
2726670	1011690	4946130	1824370	611286	1003610	FALSE		3,35E+18	NaN	NaN	NaN	0	41,498	16	6	19	6	534	60,9	8,44	2207,99	38,6	4	6	O43242	26S proteasome non-ATPase regulatory subunit 3 OS=Homo sapiens OX=9606 GN=PSMD3 PE=1 SV=2	0	Pf01399, Pf08375	5709	ENSG00000108344	PSMD3	B3KMW9;B4DT72;hsa:5709;O43242;Q96EI2;Q9BQA4
3188290	2914800	3703150	490678	1008860	116560	FALSE		-9,22E+18	NaN	NaN	NaN	0	41,398	70	7	29	7	172	19,2	5,4	3033,54	37,35	6	7	O95881	Thioredoxin domain-containing protein 12 OS=Homo sapiens OX=9606 GN=TXNDC12 PE=1 SV=1	0	Pf13899	51060	ENSG00000117862	TXNDC12	B3KQS0;hsa:51060;O95881;Q5T1T4;Q96H50
NaN	NaN	NaN	7799310	4621330	1729990	FALSE		-1,19E+18	NaN	NaN	NaN	0	41,381	35	6	32	6	245	27,6	7,8	3046,02	55,33	5	6	P54108	Cysteine-rich secretory protein 3 OS=Homo sapiens OX=9606 GN=CRISP3 PE=1 SV=1	0	Pf00188, Pf08562	10321	ENSG00000096006	CRISP3	A8K9S1;B2R8I8;hsa:10321;P54108;Q15512;Q3MJ82;Q53FA9;Q5JW83;Q9H108
791989	1875820	1334560	NaN	12928,2	NaN	FALSE		7,63E+18	NaN	NaN	NaN	0	41,325	46	8	26	8	261	30	7,06	2910,92	35,45	5	8	Q9NVS9	Pyridoxine-5'-phosphate oxidase OS=Homo sapiens OX=9606 GN=PNPO PE=1 SV=1	0	Pf01243, Pf10590	55163	ENSG00000108439	PNPO	B4E0V0;B4E152;B4E1D7;D3DTT9;hsa:55163;Q9NVS9
3741120	1898810	5264310	205554	116649	2539	FALSE		-8,33E+18	NaN	NaN	NaN	0	41,245	31	9	32	9	317	34,3	5,97	2975,42	38,6	8	9	P05388	60S acidic ribosomal protein P0 OS=Homo sapiens OX=9606 GN=RPLP0 PE=1 SV=1	0	Pf00428, Pf00466, Pf17777	6175	ENSG00000089157	RPLP0	hsa:6175;P05388;Q3B7A4;Q9BVK4
1749800	1693490	1933970	1537840	871329	457338	FALSE		-3,31E+18	NaN	NaN	NaN	0	41,228	38	9	72	9	256	29,5	7,08	6083,31	42,47	8	9	O00584	Ribonuclease T2 OS=Homo sapiens OX=9606 GN=RNASET2 PE=1 SV=2	0	Pf00445	8635	ENSG00000026297	RNASET2	B2RDA7;E1P5C3;hsa:8635;O00584;Q5T8Q0;Q8TCU2;Q9BZ46;Q9BZ47
4159050	2752170	5619350	346730	96302	4863,31	FALSE		1,52E+17	NaN	NaN	NaN	0	41,177	16	7	24	7	638	71,4	5,2	1847,83	37,05	4	7	Q13409	Cytoplasmic dynein 1 intermediate chain 2 OS=Homo sapiens OX=9606 GN=DYNC1I2 PE=1 SV=3	0	Pf00400, Pf11540	1781	ENSG00000077380	DYNC1I2	B7ZA04;D3DPD4;D3DPD5;D3DPD6;hsa:1781;Q13409;Q32LY9;Q53S84;Q5BJF8;Q7Z4X1;Q96NG7;Q96S87;Q9BXZ5;Q9NT58
1157700	2695260	1488680	24705,4	30156,2	NaN	FALSE	Acetyl [N-Term];Met-loss+Acetyl [N-Term]	7,31E+18	NaN	NaN	NaN	0	41,104	45	6	17	6	124	13,7	8,48	2381,15	25,34	4	4	O14907	Tax1-binding protein 3 OS=Homo sapiens OX=9606 GN=TAX1BP3 PE=1 SV=2	0	Pf00595, Pf02163	30851	ENSG00000213977	TAX1BP3	B2RD53;D3DTJ6;hsa:30851;O14907;Q7LCQ4
2753260	581652	2612320	36726,6	364071	52704,2	TRUE		6,1E+18	NaN	NaN	NaN	0	41,083	24	7	47	7	411	46,2	5,85	6021,27	62,65	5	7	Q9TTE1	SWISS-PROT:Q9TTE1 (Bos taurus) Endopin-1 precursor	0
3331380	2279790	3711520	2003180	1779430	36538,6	FALSE		-2,3E+18	NaN	NaN	NaN	0	40,915	57	9	70	9	214	22,1	8,7	6940,2	98,7	7	9	P30044	Peroxiredoxin-5, mitochondrial OS=Homo sapiens OX=9606 GN=PRDX5 PE=1 SV=4	0	Pf08534	25824	ENSG00000126432	PRDX5	A6NC19;A6NG06;B7ZLJ4;B7ZVW3;hsa:25824;P30044;Q14CK0;Q6IAF2;Q9UBU5;Q9UJU4;Q9UKX4
1280430	773491	1108040	52506,7	24600,9	21282,2	FALSE	Acetyl [N-Term];Met-loss+Acetyl [N-Term]	-2,66E+18	NaN	NaN	NaN	0	40,906	17	7	20	7	505	55,2	7,23	2109,26	19,62	5	6	Q9Y3I0	RNA-splicing ligase RtcB homolog OS=Homo sapiens OX=9606 GN=RTCB PE=1 SV=1	0	Pf01139	51493	ENSG00000100220	RTCB	B2R6A8;hsa:51493;Q6IAI0;Q9BWL4;Q9NTH1;Q9P037;Q9P0J3;Q9Y3I0
988704	752149	796450	NaN	NaN	15007,8	FALSE		-8,16E+17	NaN	NaN	NaN	0	40,9	10	4	13	4	788	86,7	5,38	2036,06	30,01	2	4	Q6P996	Pyridoxal-dependent decarboxylase domain-containing protein 1 OS=Homo sapiens OX=9606 GN=PDXDC1 PE=1 SV=2	0	Pf00282	23042	ENSG00000179889;ENSG00000275498	PDXDC1	B4DR55;B4DSL3;E7EMH5;E7EPL4;H3BNZ1;hsa:23042;O00236;Q4F6X7;Q6P996;Q6PID7;Q86YF1;Q8N4Q9;Q8TBS5
3030870	5666440	4167430	55909,3	111626	NaN	FALSE		3,55E+18	NaN	NaN	NaN	0	40,871	31	5	23	5	223	25	5,34	1677,99	38,12	2	5	Q9GZX9	Twisted gastrulation protein homolog 1 OS=Homo sapiens OX=9606 GN=TWSG1 PE=1 SV=1	0	Pf04668	57045	ENSG00000128791	TWSG1	B2RE08;D3DUH9;hsa:57045;Q8NBI7;Q96K46;Q9GZX9
935636	331640	1941430	804507	1265040	534397	FALSE	Met-loss+Acetyl [N-Term]	1,63E+18	NaN	NaN	NaN	0	40,869	41	10	26	10	323	36,4	5,92	1621,73	19,15	5	10	P12429	Annexin A3 OS=Homo sapiens OX=9606 GN=ANXA3 PE=1 SV=3	0	Pf00191	306	ENSG00000138772	ANXA3	B2R9W6;hsa:306;P12429;Q6LET2
5203730	1989670	3229110	805317	291649	333751	FALSE		-2,86E+18	NaN	NaN	NaN	0	40,867	37	4	56	4	166	18,4	8,29	4526,02	91,95	2	4	Q99757	Thioredoxin, mitochondrial OS=Homo sapiens OX=9606 GN=TXN2 PE=1 SV=2	0	Pf00085	25828	ENSG00000100348	TXN2	hsa:25828;Q5JZA0;Q6FH60;Q99757;Q9UH29
1582360	261600	2698070	71705,9	64274,5	NaN	FALSE		-5,86E+18	NaN	NaN	NaN	0	40,819	7	9	37	8	2225	242,8	6,46	2457,06	34,27	5	9	P27708	CAD protein OS=Homo sapiens OX=9606 GN=CAD PE=1 SV=3	1	Pf00117, Pf00185, Pf00988, Pf01979, Pf02142, Pf02729, Pf02786, Pf02787	790	ENSG00000084774	CAD	D6W552;hsa:790;P27708;Q6P0Q0;Q96CK3
1152750	398659	1160500	39904,8	4553,71	NaN	FALSE		5,22E+18	NaN	NaN	NaN	0	40,803	13	9	41	9	1032	112,9	7,25	5135,2	39,03	7	9	O94855	Protein transport protein Sec24D OS=Homo sapiens OX=9606 GN=SEC24D PE=1 SV=2	0	Pf00626, Pf04810, Pf04811, Pf04815, Pf08033	9871	ENSG00000150961	SEC24D	hsa:9871;O94855;Q8IYI7
97699,1	NaN	43569,4	6637060	1815150	2236980	FALSE		-2,26E+18	NaN	NaN	NaN	0	40,755	24	9	45	9	510	57,2	5,69	3695,56	58,35	6	9	Q6UX06	Olfactomedin-4 OS=Homo sapiens OX=9606 GN=OLFM4 PE=1 SV=1	0	Pf02191	10562	ENSG00000102837	OLFM4	hsa:10562;O95362;Q5VWG0;Q6UX06;Q86T22
794376	931651	858680	434593	306082	79225,3	FALSE	Acetyl [N-Term];Met-loss+Acetyl [N-Term]	-4,35E+18	NaN	NaN	NaN	0	40,734	23	8	25	8	423	46,6	5,95	1801,77	14,51	6	7	P34949	Mannose-6-phosphate isomerase OS=Homo sapiens OX=9606 GN=MPI PE=1 SV=2	0	Pf01238, Pf20511, Pf20512	4351	ENSG00000178802	MPI	A8K8K9;hsa:4351;P34949;Q96AB0
355813	692624	193714	2435770	2157460	69077,4	FALSE		3,6E+18	NaN	NaN	NaN	0	40,593	28	7	28	7	382	42	6,83	2796,05	42	5	7	Q9UGM5	Fetuin-B OS=Homo sapiens OX=9606 GN=FETUB PE=1 SV=2	0	Pf00031	26998	ENSG00000090512	FETUB	B2RCW6;E9PG06;hsa:26998;Q1RMZ0;Q5J876;Q6DK58;Q6GRB6;Q9UGM5;Q9Y6Z0
174480	4894,34	168455	NaN	NaN	NaN	FALSE		9,65E+17	NaN	NaN	NaN	0	40,54	8	6	23	1	953	107,4	6,16	1304,81	49,81	3	6	Q14151	Scaffold attachment factor B2 OS=Homo sapiens OX=9606 GN=SAFB2 PE=1 SV=1	0	Pf00076, Pf02037	9667	ENSG00000130254	SAFB2	B4DKG3;hsa:9667;Q14151;Q8TB13
NaN	NaN	NaN	143011	301625	NaN	FALSE		-2,76E+18	NaN	NaN	NaN	0	40,53	35	3	97	1	117	12,8	8,66	11290,9	139,43	3	3	A0A0B4J1X5	Immunoglobulin heavy variable 3-74 OS=Homo sapiens OX=9606 GN=IGHV3-74 PE=3 SV=1	0	Pf07686		ENSG00000224650;ENSG00000282305	IGHV3-74	A0A0B4J1X5
1038980	920028	1782810	NaN	NaN	NaN	FALSE		5,14E+18	NaN	NaN	NaN	0	40,504	42	11	19	11	418	47,3	5,21	725,16	20,91	4	11	P43686	26S proteasome regulatory subunit 6B OS=Homo sapiens OX=9606 GN=PSMC4 PE=1 SV=2	0	Pf00004, Pf16450, Pf17862	5704	ENSG00000013275;ENSG00000281221	PSMC4	hsa:5704;P43686;Q96FV5;Q9UBM3;Q9UEX3
1577430	514202	852860	50805,1	82463,8	NaN	FALSE		6,28E+17	NaN	NaN	NaN	0	40,455	7	6	14	6	1220	138,7	5,49	1505,4	16,47	5	6	O60841	Eukaryotic translation initiation factor 5B OS=Homo sapiens OX=9606 GN=EIF5B PE=1 SV=4	0	Pf00009, Pf03144, Pf11987	9669	ENSG00000158417	EIF5B	hsa:9669;O60841;O95805;Q53RV7;Q53SI8;Q9UF81;Q9UMN7
9319660	1695890	7730550	4311160	2574700	434283	FALSE		7,66E+17	NaN	NaN	NaN	0	40,452	56	5	52	5	81	9,1	8,43	6152,73	49,47	5	5	Q15843	NEDD8 OS=Homo sapiens OX=9606 GN=NEDD8 PE=1 SV=1	0	Pf00240	4738	ENSG00000129559;ENSG00000285246	NEDD8	hsa:4738;Q15843;Q3SXN8;Q6LES6
2934900	1164390	4584920	NaN	NaN	4808,08	FALSE		-7,66E+18	NaN	NaN	NaN	0	40,45	20	6	36	6	464	51,5	8,66	3066,84	56,58	5	6	P78539	Sushi repeat-containing protein SRPX OS=Homo sapiens OX=9606 GN=SRPX PE=1 SV=1	0	Pf00084, Pf02494, Pf13778	8406	ENSG00000101955	SRPX	A8K065;B3KWP8;B4DDB8;B4DQH5;F5H4D7;G3V1L0;hsa:8406;P78539;Q4VX66;Q99652;Q99913
1132150	804039	975501	73993,6	26614	47588,5	FALSE		5E+18	NaN	NaN	NaN	0	40,435	18	6	24	6	514	55,6	5,55	2390,52	24,94	5	6	Q9BZK7	F-box-like/WD repeat-containing protein TBL1XR1 OS=Homo sapiens OX=9606 GN=TBL1XR1 PE=1 SV=1	0	Pf00400, Pf08513	79718	ENSG00000177565	TBL1XR1	D3DNQ9;hsa:79718;Q14DC3;Q9BZK7;Q9H2I1;Q9H9A1
203229	2971280	275587	55351	94286,1	33749,5	FALSE		-2,98E+18	NaN	NaN	NaN	0	40,428	46	9	28	8	225	26,5	5,54	2798,42	21,96	9	9	P21266	Glutathione S-transferase Mu 3 OS=Homo sapiens OX=9606 GN=GSTM3 PE=1 SV=3	0	Pf00043, Pf02798	2947	ENSG00000134202	GSTM3	hsa:2947;O60550;P21266;Q96HA3
1380930	2079950	1356810	186183	198834	NaN	FALSE		9,17E+18	NaN	NaN	NaN	0	40,265	23	8	43	8	487	55	7,81	3933,19	42,76	7	8	Q9UNW1	Multiple inositol polyphosphate phosphatase 1 OS=Homo sapiens OX=9606 GN=MINPP1 PE=1 SV=1	0	Pf00328	9562	ENSG00000107789	MINPP1	F5H683;hsa:9562;O95172;O95286;Q59EJ2;Q9UGA3;Q9UNW1
549605	596935	649785	NaN	NaN	NaN	FALSE		5,87E+18	NaN	NaN	NaN	0	40,223	25	7	25	7	492	55,8	5,94	2835,74	23,78	6	7	Q495W5	Alpha-(1,3)-fucosyltransferase 11 OS=Homo sapiens OX=9606 GN=FUT11 PE=1 SV=1	0	Pf00852, Pf17039	170384	ENSG00000196968	FUT11	hsa:170384;Q495W5;Q495W7;Q8IYE4
39869500	440037	75307500	964532	4023860	NaN	FALSE		-3,25E+18	NaN	NaN	NaN	0	40,175	35	5	58	5	158	17,6	4,96	8024,69	69,34	4	5	P10124	Serglycin OS=Homo sapiens OX=9606 GN=SRGN PE=1 SV=3	0	Pf04360	5552	ENSG00000122862	SRGN	B2R4L7;hsa:5552;P10124;Q5VW06
931659	2092550	924388	326884	502828	50139,5	FALSE	Acetyl [N-Term]	3,97E+18	NaN	NaN	NaN	0	40,163	48	8	30	8	230	26,2	4,92	2989,66	34,34	7	8	P15374	Ubiquitin carboxyl-terminal hydrolase isozyme L3 OS=Homo sapiens OX=9606 GN=UCHL3 PE=1 SV=1	0	Pf01088	7347	ENSG00000118939	UCHL3	B2R970;hsa:7347;P15374;Q5TBK8;Q6IBE9
1907790	2423340	2786790	37775,8	21459,3	428861	FALSE		9,14E+18	NaN	NaN	NaN	0	40,125	49	8	26	8	290	31,4	8,07	2339,05	32,6	5	8	P30084	Enoyl-CoA hydratase, mitochondrial OS=Homo sapiens OX=9606 GN=ECHS1 PE=1 SV=4	0	Pf00378	1892	ENSG00000127884	ECHS1	hsa:1892;O00739;P30084;Q5VWY1;Q96H54
2603210	1046060	3803440	682840	140424	NaN	FALSE		1,48E+18	NaN	NaN	NaN	0	40,113	22	6	27	6	522	56	8,78	3118,18	56,19	3	6	Q9P258	Protein RCC2 OS=Homo sapiens OX=9606 GN=RCC2 PE=1 SV=2	0	Pf00415	55920	ENSG00000179051;ENSG00000281540	RCC2	hsa:55920;Q8IVL9;Q9BSN6;Q9NPV8;Q9P258
2297090	1401770	4242890	439288	258295	35428	FALSE	Acetyl [N-Term];Met-loss+Acetyl [N-Term]	1,01E+18	NaN	NaN	NaN	0	40,098	24	8	32	8	472	51,1	8,4	3668,79	32,54	5	7	P41091	Eukaryotic translation initiation factor 2 subunit 3 OS=Homo sapiens OX=9606 GN=EIF2S3 PE=1 SV=3	0	Pf00009, Pf03144, Pf09173	1968	ENSG00000130741	EIF2S3	A0A024RBY4;A8K2Y2;B2R5N2;B5BTZ4;hsa:1968;P41091;Q53HK3
188575	171816	207278	3830680	2213350	239064	FALSE	Acetyl [N-Term];Met-loss+Acetyl [N-Term]	-1,64E+18	NaN	NaN	NaN	0	40,064	17	9	46	9	609	69,2	7,8	3572,22	35,98	7	8	Q7LDG7	RAS guanyl-releasing protein 2 OS=Homo sapiens OX=9606 GN=RASGRP2 PE=1 SV=1	0	Pf00130, Pf00617, Pf00618, Pf13202	10235	ENSG00000068831	RASGRP2	A6NDC7;hsa:10235;O00538;Q7LDG7;Q9UL65
2012390	1060700	2372400	4824450	5958860	541492	FALSE		-6,63E+18	NaN	NaN	NaN	0	40,035	53	7	26	7	126	13,9	10,32	2553,25	50,73	4	7	P62318	Small nuclear ribonucleoprotein Sm D3 OS=Homo sapiens OX=9606 GN=SNRPD3 PE=1 SV=1	0	Pf01423	6634	ENSG00000100028	SNRPD3	B4DJP7;B5BU13;hsa:6634;P43331;P62318
47239,5	9584,36	19555,5	1710600	2166210	753494	FALSE		4,27E+18	NaN	NaN	NaN	0	40,012	40	8	28	8	288	31,7	7,88	2196,14	46,39	6	8	P27105	Stomatin OS=Homo sapiens OX=9606 GN=STOM PE=1 SV=3	0	Pf01145	2040	ENSG00000148175	STOM	B1AM77;hsa:2040;P27105;Q14087;Q15609;Q5VX96;Q96FK4
379423	90526,2	1214200	7240,2	NaN	NaN	FALSE		-4,95E+18	NaN	NaN	NaN	0	39,989	5	9	23	9	2774	307,6	6,68	1796,85	12,65	6	9	Q9NT68	Teneurin-2 OS=Homo sapiens OX=9606 GN=TENM2 PE=1 SV=3	0	Pf06484, Pf15636	57451	ENSG00000145934	TENM2	hsa:57451;Q9NT68;Q9ULU2
1531170	1201720	1549460	14662,3	58899,8	NaN	FALSE	Met-loss+Acetyl [N-Term]	7,34E+18	NaN	NaN	NaN	0	39,91	24	7	23	7	340	36,5	5,41	1769,16	34,2	3	7	Q96IZ0	PRKC apoptosis WT1 regulator protein OS=Homo sapiens OX=9606 GN=PAWR PE=1 SV=1	0		5074	ENSG00000177425	PAWR	hsa:5074;O75796;Q6FHY9;Q8N700;Q96IZ0
21365,9	57831,8	21039,2	1689770	4648970	2053860	FALSE		-1,45E+17	NaN	NaN	NaN	0	39,78	23	7	44	7	472	53	7,96	4719,34	53,31	5	7	P16671	Platelet glycoprotein 4 OS=Homo sapiens OX=9606 GN=CD36 PE=1 SV=2	0	Pf01130	948	ENSG00000135218	CD36	D9IX66;D9IX67;D9IX68;D9IX69;hsa:948;P16671;Q13966;Q16093;Q8TCV7;Q9BPZ8;Q9BQC2;Q9BZM8;Q9BZN3;Q9BZN4;Q9BZN5
527326	1982490	626615	NaN	NaN	NaN	FALSE	Acetyl [N-Term];Met-loss+Acetyl [N-Term]	-2,89E+18	NaN	NaN	NaN	0	39,759	13	8	15	8	1010	107,7	6,7	462,8	21,14	2	7	P22102	Trifunctional purine biosynthetic protein adenosine-3 OS=Homo sapiens OX=9606 GN=GART PE=1 SV=1	0	Pf00551, Pf00586, Pf01071, Pf02769, Pf02843, Pf02844	2618	ENSG00000159131;ENSG00000262473	GART	A8K945;A8KA32;D3DSF3;D3DSF4;hsa:2618;O14659;P22102;Q52M77
2691760	NaN	3790090	1399890	1705910	32395,6	FALSE		-2,4E+18	NaN	NaN	NaN	0	39,616	15	6	31	6	529	59,5	6,46	3770,52	34,47	5	6	Q6UX71	Plexin domain-containing protein 2 OS=Homo sapiens OX=9606 GN=PLXDC2 PE=1 SV=1	0	Pf01437	84898	ENSG00000120594	PLXDC2	hsa:84898;Q6UX71;Q96E59;Q96PD9;Q96SU9
177058	209633	209775	3519460	3471780	110005	FALSE		3,43E+18	NaN	NaN	NaN	0	39,611	17	7	42	6	602	68,4	7,42	3323,1	50,87	5	7	P06276	Cholinesterase OS=Homo sapiens OX=9606 GN=BCHE PE=1 SV=1	1	Pf00135, Pf08674	590	ENSG00000114200	BCHE	A8K7P8;hsa:590;P06276
927992	774064	975664	2100200	2376790	550019	FALSE		-1,58E+18	NaN	NaN	NaN	0	39,605	16	9	57	9	721	82,1	6,95	5065,14	61,26	7	9	Q9Y608	Leucine-rich repeat flightless-interacting protein 2 OS=Homo sapiens OX=9606 GN=LRRFIP2 PE=1 SV=1	0	Pf09738	9209	ENSG00000093167	LRRFIP2	A8K649;A8MXR0;B4DY63;hsa:9209;Q68CV3;Q9NXH5;Q9Y608
591689	226306	329221	2795540	4255980	226847	FALSE	Acetyl [N-Term];Met-loss+Acetyl [N-Term]	-2,44E+18	NaN	NaN	NaN	0	39,565	41	7	33	7	172	19	5,35	3614,5	37,95	5	6	Q3ZCW2	Galectin-related protein OS=Homo sapiens OX=9606 GN=LGALSL PE=1 SV=2	0	Pf00337	29094	ENSG00000119862	LGALSL	B2RBG8;D6W5E8;hsa:29094;Q3ZCW2;Q6P5T6;Q9P005
805389	535800	496223	NaN	NaN	NaN	FALSE		7,15E+18	NaN	NaN	NaN	0	39,529	36	7	28	4	276	31,1	6,95	2502,54	31,39	5	7	Q8TDQ7	Glucosamine-6-phosphate isomerase 2 OS=Homo sapiens OX=9606 GN=GNPDA2 PE=1 SV=1	0	Pf01182	132789	ENSG00000163281	GNPDA2	B4DJF3;hsa:132789;Q2VYF1;Q59EA7;Q8NCZ8;Q8TDQ7;Q96BJ4;Q96NC6
1621990	NaN	2748780	NaN	NaN	962,059	FALSE		-3,68E+18	NaN	NaN	NaN	0	39,491	7	7	111	2	1487	141,7	6,92	10601,8	103,49	5	7	P02458	Collagen alpha-1(II) chain OS=Homo sapiens OX=9606 GN=COL2A1 PE=1 SV=3	0	Pf00093, Pf01391, Pf01410	1280	ENSG00000139219	COL2A1	A6NGA0;hsa:1280;P02458;Q12985;Q14009;Q14044;Q14045;Q14046;Q14047;Q14056;Q14058;Q16672;Q1JQ82;Q2V4X7;Q6LBY1;Q6LBY2;Q6LBY3;Q96IT5;Q99227;Q9UE38;Q9UE39;Q9UE40;Q9UE41;Q9UE42;Q9UE43
2168340	679251	1271490	382141	217531	68793,8	FALSE		-8,11E+18	NaN	NaN	NaN	0	39,487	9	6	23	6	656	68,4	9,33	3669,19	35,69	6	6	Q01844	RNA-binding protein EWS OS=Homo sapiens OX=9606 GN=EWSR1 PE=1 SV=1	0	Pf00076, Pf00641	2130	ENSG00000182944	EWSR1	B0QYK1;hsa:2130;Q01844;Q5THL0;Q92635;Q96FE8;Q96MN4;Q96MX4;Q9BWA2
2062660	3429630	6045230	13247,1	21041,9	4427,47	FALSE	Met-loss [N-Term]	-4E+18	NaN	NaN	NaN	0	39,409	35	10	20	10	324	37	6,77	1904,09	20,45	8	9	P51665	26S proteasome non-ATPase regulatory subunit 7 OS=Homo sapiens OX=9606 GN=PSMD7 PE=1 SV=2	0	Pf01398, Pf13012	5713	ENSG00000103035	PSMD7	D3DWS9;hsa:5713;P51665;Q6PKI2;Q96E97
129597	766272	127291	3062470	3750510	302376	FALSE		1,75E+18	NaN	NaN	NaN	0	39,389	15	8	42	8	783	85,3	6,48	3541,88	76,43	7	8	O15117	FYN-binding protein 1 OS=Homo sapiens OX=9606 GN=FYB1 PE=1 SV=2	0	Pf07653, Pf14603	2533	ENSG00000082074	FYB1	A8K2Y8;B4DLN2;E9PBV9;hsa:2533;O00359;O15117;Q9NZI9
1725920	47875,6	2560780	27992,5	8257,17	NaN	FALSE		-9,1E+18	NaN	NaN	NaN	0	39,32	11	8	29	8	1413	152,1	6,98	2538,51	34,52	5	8	Q8TER0	Sushi, nidogen and EGF-like domain-containing protein 1 OS=Homo sapiens OX=9606 GN=SNED1 PE=1 SV=2	0	Pf00008, Pf00041, Pf06119, Pf12661	25992	ENSG00000162804	SNED1	B5MDC3;B7WNK6;B7WPM0;hsa:25992;Q336F4;Q336F5;Q8N369;Q8TEP7;Q8TER0
2677410	1556370	5565680	309385	251795	NaN	FALSE	Met-loss [N-Term]	6,84E+18	NaN	NaN	NaN	0	39,264	23	9	26	9	389	45,5	5,62	3496,04	30,4	7	8	Q15008	26S proteasome non-ATPase regulatory subunit 6 OS=Homo sapiens OX=9606 GN=PSMD6 PE=1 SV=1	0	Pf01399, Pf10602	9861	ENSG00000163636	PSMD6	A8K2E0;E9PHI9;hsa:9861;Q15008;Q6UV22
4391610	12398,4	4029920	20462600	27321400	33379,6	FALSE		-8,3E+18	NaN	NaN	NaN	0	39,23	11	6	66	1	629	70,2	5,41	8101,34	98,42	4	6	Q14651	Plastin-1 OS=Homo sapiens OX=9606 GN=PLS1 PE=1 SV=2	0	Pf00036, Pf00307, Pf13833	5357	ENSG00000120756	PLS1	A8K2Q1;D3DNG3;hsa:5357;Q14651;Q8NEG6
6434300	14174600	20175300	NaN	95450,5	229600	FALSE		9,17E+18	NaN	NaN	NaN	0	39,206	55	3	40	3	98	11,1	6,71	1007,33	78,17	1	3	O75711	Scrapie-responsive protein 1 OS=Homo sapiens OX=9606 GN=SCRG1 PE=1 SV=1	0	Pf15224	11341	ENSG00000164106	SCRG1	hsa:11341;O75711
NaN	NaN	NaN	11456000	8318500	NaN	FALSE		3,71E+18	NaN	NaN	NaN	0	39,205	41	5	43	5	196	21,7	8,59	4376,96	71,69	4	5	O75594	Peptidoglycan recognition protein 1 OS=Homo sapiens OX=9606 GN=PGLYRP1 PE=1 SV=1	0	Pf01510	8993	ENSG00000008438	PGLYRP1	hsa:8993;O75594;Q4VB36
268151	3374970	1162940	77898,4	265827	37869,2	FALSE		-8,83E+18	NaN	NaN	NaN	0	39,121	31	9	21	9	403	46,1	10,18	1168,75	21,47	5	9	P39023	60S ribosomal protein L3 OS=Homo sapiens OX=9606 GN=RPL3 PE=1 SV=2	0	Pf00297	6122	ENSG00000100316	RPL3	B2RDV9;hsa:6122;P39023;Q15548;Q5I0G0
5298440	1312510	8288960	94363200	74408700	1106470	FALSE		2,43E+18	NaN	NaN	NaN	0	39,106	43	5	74	1	136	15,4	11,12	5315,68	63,92	4	5	P68431	Histone H3.1 OS=Homo sapiens OX=9606 GN=H3C12 PE=1 SV=2	4	Pf00125	8350;8351;8352;8353;8354;8355;8356;8357;8358;8968	ENSG00000197153;ENSG00000197409;ENSG00000273983;ENSG00000274750;ENSG00000275379;ENSG00000275714;ENSG00000277775;ENSG00000278828;ENSG00000286522;ENSG00000287080	H3C1;H3C10;H3C11;H3C12;H3C2;H3C3;H3C4;H3C6;H3C7;H3C8	A0PJT7;A5PLR1;hsa:8350;hsa:8351;hsa:8352;hsa:8353;hsa:8354;hsa:8355;hsa:8356;hsa:8357;hsa:8358;hsa:8968;P02295;P02296;P16106;P68431;Q6ISV8;Q6NWP8;Q6NWP9;Q6NXU4;Q71DJ3;Q93081
72019,2	15685400	55606,4	NaN	NaN	NaN	FALSE		1,55E+18	NaN	NaN	NaN	0	39,101	11	5	21	5	640	70,3	8,79	2246,93	23,66	5	5	Q02297	Pro-neuregulin-1, membrane-bound isoform OS=Homo sapiens OX=9606 GN=NRG1 PE=1 SV=3	0	Pf00008, Pf02158, Pf07679	3084	ENSG00000157168	NRG1	A5YAK4;A5YAK5;A8K1L2;B7Z4Z3;E9PHH4;hsa:3084;O14667;P98202;Q02297;Q02298;Q02299;Q07110;Q07111;Q12779;Q12780;Q12781;Q12782;Q12783;Q12784;Q15491;Q7RTV9;Q7RTW0;Q7RTW1;Q7RTW2;Q8NFN1;Q8NFN2;Q8NFN3;Q9UPE3
238146	NaN	322485	4458920	3809620	440178	FALSE		4,69E+18	NaN	NaN	NaN	0	39,01	35	9	40	9	375	40,1	6,23	3182,36	42,64	7	9	P08571	Monocyte differentiation antigen CD14 OS=Homo sapiens OX=9606 GN=CD14 PE=1 SV=2	0		929	ENSG00000170458	CD14	hsa:929;P08571;Q53XT5;Q96FR6;Q96L99;Q9UNS3
761514	482934	1078700	NaN	22579,8	NaN	FALSE		1,24E+18	NaN	NaN	NaN	0	38,927	60	6	30	6	163	18,2	8,82	2386,08	26,74	4	6	Q13526	Peptidyl-prolyl cis-trans isomerase NIMA-interacting 1 OS=Homo sapiens OX=9606 GN=PIN1 PE=1 SV=1	0	Pf00397, Pf00639	5300	ENSG00000127445	PIN1	A8K4V9;hsa:5300;Q13526;Q53X75
5011610	1576960	3205090	2996560	4227010	41261,5	FALSE	Acetyl [N-Term];Met-loss+Acetyl [N-Term]	-3,85E+18	NaN	NaN	NaN	0	38,9	24	7	51	6	226	22,6	10,92	6308,92	63,43	6	6	P16401	Histone H1.5 OS=Homo sapiens OX=9606 GN=H1-5 PE=1 SV=3	0	Pf00538	3009	ENSG00000184357	H1-5	hsa:3009;P16401;Q14529;Q3MJ42
1316450	97772	1115120	NaN	52550,9	NaN	FALSE		6,65E+18	NaN	NaN	NaN	0	38,8	8	5	22	5	1087	114,5	7,11	3543,24	28,85	4	5	Q14157	Ubiquitin-associated protein 2-like OS=Homo sapiens OX=9606 GN=UBAP2L PE=1 SV=2	0	Pf12478	9898	ENSG00000143569	UBAP2L	B4E0U8;hsa:9898;Q14157;Q5VU75;Q5VU76;Q9BTU3;Q9UGL2;Q9UGL3;Q9UGL4;Q9UGL5
1382020	416838	2132230	259371	350883	96723,9	FALSE		-6,99E+18	NaN	NaN	NaN	0	38,769	38	7	30	2	309	35,6	5,43	1253,95	37,15	3	7	P62714	Serine/threonine-protein phosphatase 2A catalytic subunit beta isoform OS=Homo sapiens OX=9606 GN=PPP2CB PE=1 SV=1	5	Pf00149	5516	ENSG00000104695	PPP2CB	D3DSV4;hsa:5516;P11082;P62714;Q6FHK5
3566000	1098160	3857710	151387	136219	126043	FALSE	Met-loss [N-Term]	-3,32E+18	NaN	NaN	NaN	0	38,63	36	4	28	4	86	10,1	7,97	3468,46	31,39	3	3	P49458	Signal recognition particle 9 kDa protein OS=Homo sapiens OX=9606 GN=SRP9 PE=1 SV=2	0	Pf05486	6726	ENSG00000143742	SRP9	A8K0N0;hsa:6726;P49458;Q6NVX0;Q8WTW0
744954	201645	387064	696486	555564	94165,5	FALSE		4,12E+18	NaN	NaN	NaN	0	38,626	12	6	22	6	652	70,7	7,9	1092,78	32,45	4	6	Q13492	Phosphatidylinositol-binding clathrin assembly protein OS=Homo sapiens OX=9606 GN=PICALM PE=1 SV=2	0	Pf07651	8301	ENSG00000073921	PICALM	B4DTM3;E9PN05;F8VPG7;hsa:8301;O60700;Q13492;Q4LE54;Q6GMQ6;Q86XZ9
2998480	2133800	4771840	293329	492217	105235	FALSE	Met-loss+Acetyl [N-Term]	-7,48E+18	NaN	NaN	NaN	0	38,623	57	6	25	6	201	23,3	5,29	1507,25	33,22	3	6	P43487	Ran-specific GTPase-activating protein OS=Homo sapiens OX=9606 GN=RANBP1 PE=1 SV=1	0	Pf00638	5902	ENSG00000099901	RANBP1	hsa:5902;P43487;Q53EY3
407320	NaN	2973140	NaN	NaN	NaN	FALSE		-1,5E+18	NaN	NaN	NaN	0	38,608	22	7	9	7	680	66,1	9,67	207,11	19,47	1	7	Q03692	Collagen alpha-1(X) chain OS=Homo sapiens OX=9606 GN=COL10A1 PE=1 SV=2	0	Pf00386, Pf01391	1300	ENSG00000123500	COL10A1	A1L4P2;hsa:1300;Q03692
1605610	NaN	1648910	31409200	98060200	NaN	FALSE		-3,67E+18	NaN	NaN	NaN	0	38,558	47	4	84	2	116	12,5	4,96	8489,11	122,2	2	4	P01619	Immunoglobulin kappa variable 3-20 OS=Homo sapiens OX=9606 GN=IGKV3-20 PE=1 SV=2	2	Pf07686		ENSG00000239951;ENSG00000282402	IGKV3-20	A0A0B4J1Z6;P01619;P01620;P01621;P01622;P01623;P04206;P06311;P18135;P18136
1367700	817575	1397910	126522	359582	26314,2	FALSE		8,48E+18	NaN	NaN	NaN	0	38,499	17	8	27	8	570	65,4	8,12	2473,18	22,73	7	8	Q9NPH3	Interleukin-1 receptor accessory protein OS=Homo sapiens OX=9606 GN=IL1RAP PE=1 SV=2	0	Pf01582, Pf13927, Pf18452	3556	ENSG00000196083	IL1RAP	B1NLD0;D3DNW0;hsa:3556;O14915;Q86WJ7;Q9NPH3
3773550	993800	4342310	815761	384686	193192	FALSE		5,31E+18	NaN	NaN	NaN	0	38,344	33	8	45	7	327	38,1	6,57	4718,9	58,36	7	8	O75436	Vacuolar protein sorting-associated protein 26A OS=Homo sapiens OX=9606 GN=VPS26A PE=1 SV=2	1	Pf03643	9559	ENSG00000122958	VPS26A	A8MZ56;B2RDD3;hsa:9559;O75436;Q8TBH4;Q9H982
NaN	NaN	NaN	72714,6	131941	4549,29	FALSE		8,32E+18	NaN	NaN	NaN	0	38,336	45	4	100	1	116	12,8	8,28	11309,4	133,48	4	4	P01767	Immunoglobulin heavy variable 3-53 OS=Homo sapiens OX=9606 GN=IGHV3-53 PE=1 SV=2	0	Pf07686		ENSG00000211967;ENSG00000282593	IGHV3-53	A0A087WSX4;P01767
947688	NaN	442546	5233670	5974060	NaN	FALSE		2,85E+18	NaN	NaN	NaN	0	38,246	45	8	45	8	198	21,7	5,59	4534,66	48,84	8	8	P30626	Sorcin OS=Homo sapiens OX=9606 GN=SRI PE=1 SV=1	0	Pf13405, Pf13833	6717	ENSG00000075142	SRI	A8MTH6;B4DKK2;D6W5Q0;hsa:6717;P30626
1336820	1997690	1627560	38174,7	33325,2	10975,1	FALSE		6,92E+18	NaN	NaN	NaN	0	38,191	30	6	24	6	330	37,4	8,95	2954,7	33,22	4	6	Q9UBQ6	Exostosin-like 2 OS=Homo sapiens OX=9606 GN=EXTL2 PE=1 SV=1	0	Pf09258	2135	ENSG00000162694	EXTL2	B2R795;D3DT60;hsa:2135;Q9UBQ6
336967	1923830	544482	6804,66	27510,5	2272,12	FALSE		6,6E+18	NaN	NaN	NaN	0	37,903	15	10	24	10	882	100,8	7,97	1892,64	18,27	9	10	P52848	Bifunctional heparan sulfate N-deacetylase/N-sulfotransferase 1 OS=Homo sapiens OX=9606 GN=NDST1 PE=1 SV=1	0	Pf00685, Pf12062	3340	ENSG00000070614	NDST1	B7Z1Q0;E7EVJ3;hsa:3340;P52848;Q96E57
2284970	892054	2997030	268140	273906	NaN	FALSE		-3,62E+18	NaN	NaN	NaN	0	37,89	27	8	21	8	401	46	8,29	2512,82	17,12	7	8	O00300	Tumor necrosis factor receptor superfamily member 11B OS=Homo sapiens OX=9606 GN=TNFRSF11B PE=1 SV=3	0	Pf00020, Pf00531	4982	ENSG00000164761	TNFRSF11B	B2R9A8;hsa:4982;O00300;O60236;Q53FX6;Q9UHP4
1160140	933717	2135860	1753650	1844390	164530	FALSE		-8,02E+18	NaN	NaN	NaN	0	37,855	21	5	43	5	510	57,5	6,77	4055,55	88,62	1	5	P49257	Protein ERGIC-53 OS=Homo sapiens OX=9606 GN=LMAN1 PE=1 SV=2	0	Pf03388	3998	ENSG00000074695	LMAN1	hsa:3998;P49257;Q12895;Q8N5I7;Q9UQG1;Q9UQG2;Q9UQG3;Q9UQG4;Q9UQG5;Q9UQG6;Q9UQG7;Q9UQG8;Q9UQG9;Q9UQH0;Q9UQH1;Q9UQH2
438539	534003	1004110	42898,3	22091,9	22332,1	FALSE		-2,74E+18	NaN	NaN	NaN	0	37,838	26	5	24	5	352	41,5	8,85	2030,34	28,12	4	5	Q9NPF2	Carbohydrate sulfotransferase 11 OS=Homo sapiens OX=9606 GN=CHST11 PE=1 SV=1	0	Pf03567	50515	ENSG00000171310	CHST11	A8K4F8;hsa:50515;Q9NPF2;Q9NXY6;Q9NY36
33905800	27263100	38063100	2315660	1106340	381895	FALSE	Acetyl [N-Term];Met-loss+Acetyl [N-Term]	-4,27E+18	NaN	NaN	NaN	0	37,772	51	9	79	9	149	17,3	5,97	7851,82	70,74	8	8	P16949	Stathmin OS=Homo sapiens OX=9606 GN=STMN1 PE=1 SV=3	0	Pf00836	3925	ENSG00000117632	STMN1	A2A2D1;B2R4E7;B7Z8N4;D3DPJ5;hsa:3925;P16949
2525420	1278050	2835520	831607	196166	50367,6	FALSE		7,17E+18	NaN	NaN	NaN	0	37,765	30	11	55	11	464	51,6	6,48	4991,68	40,07	8	11	P04424	Argininosuccinate lyase OS=Homo sapiens OX=9606 GN=ASL PE=1 SV=4	0	Pf00206, Pf14698	435	ENSG00000126522	ASL	E7EMI0;E9PE48;hsa:435;P04424;Q6LDS5;Q96HS2
1628720	1080950	2207490	25070,7	22014,1	606,007	FALSE		-6,07E+18	NaN	NaN	NaN	0	37,716	34	8	33	8	346	38,4	5,3	2944,81	27,07	6	8	Q9UBE0	SUMO-activating enzyme subunit 1 OS=Homo sapiens OX=9606 GN=SAE1 PE=1 SV=1	0	Pf00899	10055	ENSG00000142230	SAE1	B2RDP5;B3KMQ2;F5GXX7;G3XAK6;hsa:10055;O95717;Q9P020;Q9UBE0
1208740	1561400	1004560	52338	25196,9	14483,9	FALSE		2,39E+18	NaN	NaN	NaN	0	37,706	50	7	29	7	211	24,1	8,72	3750,94	34,71	6	7	P35625	Metalloproteinase inhibitor 3 OS=Homo sapiens OX=9606 GN=TIMP3 PE=1 SV=2	0	Pf00965	7078	ENSG00000100234	TIMP3	B2RBY9;hsa:7078;P35625;Q5THV4;Q9UC74;Q9UGS2
2329390	800335	1945170	458070	138625	8679,26	FALSE	Met-loss [N-Term]	-5,55E+18	NaN	NaN	NaN	0	37,667	24	9	37	9	524	59	7,34	3135,63	44,4	6	9	Q9BZZ5	Apoptosis inhibitor 5 OS=Homo sapiens OX=9606 GN=API5 PE=1 SV=3	0	Pf05918	8539	ENSG00000166181	API5	B4DGR0;B4DRJ2;B4E283;D3DR21;G3V1C3;hsa:8539;O15441;Q9BZZ5;Q9Y4J7
1054650	449286	1627130	664650	275338	NaN	FALSE		-5,66E+18	NaN	NaN	NaN	0	37,651	11	8	28	8	1025	116,5	6,21	1794,23	37	5	8	Q6WCQ1	Myosin phosphatase Rho-interacting protein OS=Homo sapiens OX=9606 GN=MPRIP PE=1 SV=3	0	Pf00169	23164	ENSG00000133030	MPRIP	hsa:23164;Q3KQZ5;Q5FB94;Q6DHW2;Q6WCQ1;Q7Z5Y2;Q8N390;Q96G40
838455	868218	766186	120234	320536	NaN	FALSE	Acetyl [N-Term];Met-loss+Acetyl [N-Term]	-6,68E+18	NaN	NaN	NaN	0	37,591	15	7	24	7	585	69	5,87	4148,8	36,05	6	6	Q9UH65	Switch-associated protein 70 OS=Homo sapiens OX=9606 GN=SWAP70 PE=1 SV=1	0	Pf00169	23075	ENSG00000133789	SWAP70	D3DQV1;hsa:23075;O75135;Q7LCY6;Q9P061;Q9P0Z8;Q9UH65
2301620	1161950	2837340	1113370	2113670	510738	FALSE		-7,97E+18	NaN	NaN	NaN	0	37,575	11	9	34	9	1030	115,2	5,4	3840,63	36,55	8	9	O14974	Protein phosphatase 1 regulatory subunit 12A OS=Homo sapiens OX=9606 GN=PPP1R12A PE=1 SV=1	0	Pf00023, Pf15898	4659	ENSG00000058272	PPP1R12A	B4DZ09;F8VWB4;hsa:4659;O14974;Q2NKL4;Q569H0;Q86WU3;Q8NFR6;Q9BYH0
2777080	548975	4752030	1918910	746077	329503	FALSE	Acetyl [N-Term];Met-loss+Acetyl [N-Term]	4,99E+18	NaN	NaN	NaN	0	37,532	46	8	43	8	183	21,2	5,55	3647,32	40,8	6	7	P02794	Ferritin heavy chain OS=Homo sapiens OX=9606 GN=FTH1 PE=1 SV=2	0	Pf00210	2495	ENSG00000167996	FTH1	B3KNR5;hsa:2495;P02794;Q3KRA8;Q3SWW1
823291	254490	910583	90124,6	7858,87	1020,86	FALSE	Acetyl [N-Term];Met-loss+Acetyl [N-Term]	8,73E+18	NaN	NaN	NaN	0	37,466	24	7	29	7	447	51,7	6,2	2453,8	29,56	5	6	P63151	Serine/threonine-protein phosphatase 2A 55 kDa regulatory subunit B alpha isoform OS=Homo sapiens OX=9606 GN=PPP2R2A PE=1 SV=1	0		5520	ENSG00000221914	PPP2R2A	B2RBU8;B4E1T7;hsa:5520;P50409;P63151;Q00007
2538090	199503	2842840	625242	235007	56376,6	FALSE		-1,82E+18	NaN	NaN	NaN	0	37,448	18	6	27	6	485	53,4	7,58	2785,27	36,44	6	6	Q9ULA0	Aspartyl aminopeptidase OS=Homo sapiens OX=9606 GN=DNPEP PE=1 SV=2	0	Pf02127	23549	ENSG00000123992	DNPEP	hsa:23549;Q9BW44;Q9NUV5;Q9NV55;Q9ULA0
10438700	19027200	27415400	2491470	3948670	103016	FALSE		-1,45E+18	NaN	NaN	NaN	0	37,413	81	10	66	10	102	10,9	8,92	5543,8	54,47	10	10	P61604	10 kDa heat shock protein, mitochondrial OS=Homo sapiens OX=9606 GN=HSPE1 PE=1 SV=2	0	Pf00166	3336	ENSG00000115541	HSPE1	hsa:3336;O95421;P61604;Q04984;Q53X54;Q9UDH0
1153430	124838	1086740	1741980	2042010	60536,4	FALSE		1,23E+18	NaN	NaN	NaN	0	37,41	7	6	32	6	1094	121,2	6,04	3280,41	38,13	4	6	O00203	AP-3 complex subunit beta-1 OS=Homo sapiens OX=9606 GN=AP3B1 PE=1 SV=3	0	Pf01602, Pf14796, Pf14797	8546	ENSG00000132842	AP3B1	E5RJ68;hsa:8546;O00203;O00580;Q7Z393;Q9HD66
1068740	1269170	1447960	174363	91462,8	6109,06	FALSE	Met-loss+Acetyl [N-Term]	-4,7E+18	NaN	NaN	NaN	0	37,408	44	5	34	5	198	22,1	5,3	2569,76	31,76	2	5	O43583	Density-regulated protein OS=Homo sapiens OX=9606 GN=DENR PE=1 SV=2	0	Pf01253	8562	ENSG00000139726	DENR	hsa:8562;O43583;Q9H3U6;Q9UKZ0
784243	704851	1654000	NaN	NaN	121514	FALSE		-4,97E+18	NaN	NaN	NaN	0	37,384	27	8	18	8	377	40,7	4,79	1596,5	25,51	5	8	P55036	26S proteasome non-ATPase regulatory subunit 4 OS=Homo sapiens OX=9606 GN=PSMD4 PE=1 SV=1	0	Pf02809, Pf13519	5710	ENSG00000159352	PSMD4	D3DV16;hsa:5710;P55036;Q5VWC5;Q9NS92
2814960	1600840	7217780	5623670	2046260	8555910	FALSE	Acetyl [N-Term];Met-loss+Acetyl [N-Term]	-1,63E+18	NaN	NaN	NaN	0	37,281	42	7	29	7	158	18,4	10,3	3711,32	39,94	6	6	P62280	40S ribosomal protein S11 OS=Homo sapiens OX=9606 GN=RPS11 PE=1 SV=3	0	Pf00366, Pf16205	6205	ENSG00000142534	RPS11	B2R4F5;hsa:6205;P04643;P62280;Q498Y6;Q6IRY0
1664880	3969350	2128970	NaN	NaN	NaN	FALSE		-6,83E+18	NaN	NaN	NaN	0	37,265	36	5	15	5	168	18,9	9,6	750,35	41,86	2	5	P21246	Pleiotrophin OS=Homo sapiens OX=9606 GN=PTN PE=1 SV=1	0	Pf01091, Pf05196	5764	ENSG00000105894	PTN	hsa:5764;P21246;Q5U0B0;Q6ICQ5;Q9UCC6
755052	993280	953189	NaN	NaN	NaN	FALSE		-5,43E+18	NaN	NaN	NaN	0	37,227	18	10	25	10	750	87,3	6,05	1726,3	10,87	7	10	P42224	Signal transducer and activator of transcription 1-alpha/beta OS=Homo sapiens OX=9606 GN=STAT1 PE=1 SV=2	0	Pf00017, Pf01017, Pf02864, Pf02865, Pf12162	6772	ENSG00000115415	STAT1	A8K989;B2RCA0;D2KFR8;D3DPI7;hsa:6772;P42224;Q53S88;Q53XW4;Q68D00;Q9UDL5
NaN	272942	NaN	NaN	NaN	NaN	TRUE		-6,16E+18	NaN	NaN	NaN	0	37,224	25	6	222	1	342	38,7	6,35	19445,9	177,5	5	6	Q05443	SWISS-PROT:Q05443 (Bos taurus) Lumican precursor	0	Pf01462, Pf12799, Pf13855	280847	ENSBTAG00000001745	LUM	bta:280847;Q05443;Q3T0T2
5865000	21131,6	5112320	8225680	1501340	758636	FALSE		-4,88E+18	NaN	NaN	NaN	0	37,201	36	5	39	5	239	25,3	4,92	3405,21	53,34	4	5	P28072	Proteasome subunit beta type-6 OS=Homo sapiens OX=9606 GN=PSMB6 PE=1 SV=4	0	Pf00227	5694	ENSG00000142507	PSMB6	hsa:5694;P28072;Q96J55
2000900	312834	2145730	269996	363977	9557,17	FALSE		8,01E+18	NaN	NaN	NaN	0	37,156	17	6	32	6	528	60,6	5,06	3873,33	44,07	5	6	Q9H3P7	Golgi resident protein GCP60 OS=Homo sapiens OX=9606 GN=ACBD3 PE=1 SV=4	0	Pf00887, Pf13897	64746	ENSG00000182827	ACBD3	B2RB29;hsa:64746;Q5VTJ0;Q6P9F1;Q8IZC5;Q8N4D6;Q9H3P7;Q9H6U3
8340180	10886500	12967800	3415360	9157630	179846	FALSE		-8,29E+18	NaN	NaN	NaN	0	37,137	50	11	47	11	108	12,8	5,29	5375,7	57,45	10	11	O75347	Tubulin-specific chaperone A OS=Homo sapiens OX=9606 GN=TBCA PE=1 SV=3	0	Pf02970	6902	ENSG00000171530	TBCA	B4DT30;hsa:6902;O75347
1708750	752873	3386980	854746	1021390	4131,97	FALSE		7,9E+18	NaN	NaN	NaN	0	37,082	25	7	27	7	440	49,2	6,21	3219,79	43,42	5	7	P62191	26S proteasome regulatory subunit 4 OS=Homo sapiens OX=9606 GN=PSMC1 PE=1 SV=1	0	Pf00004, Pf16450, Pf17862	5700	ENSG00000100764	PSMC1	B4DR63;hsa:5700;P49014;P62191;Q03527;Q6IAW0;Q6NW36;Q96AZ3
1778430	1621670	2511060	451552	247624	89934,9	FALSE		-9,86E+17	NaN	NaN	NaN	0	37,082	21	7	42	7	480	54,4	6,61	3417,39	59,26	6	7	P10619	Lysosomal protective protein OS=Homo sapiens OX=9606 GN=CTSA PE=1 SV=2	0	Pf00450	5476	ENSG00000064601	CTSA	B2R798;hsa:5476;P10619;Q561W6;Q5JZH1;Q96KJ2;Q9BR08;Q9BW68
NaN	NaN	NaN	1351600	666690	250229	FALSE		1,19E+18	NaN	NaN	NaN	0	37,029	15	7	22	7	747	82,7	6,43	2387,34	28,21	5	7	Q6UWL2	Sushi domain-containing protein 1 OS=Homo sapiens OX=9606 GN=SUSD1 PE=1 SV=1	0	Pf00084, Pf07645	64420	ENSG00000106868	SUSD1	A1A4C5;A8KA03;hsa:64420;Q5T8V6;Q5T8V7;Q6P9G7;Q6UWL2;Q8WU83;Q96DM9;Q9H6V2;Q9NTA7
696822	1925700	1298750	30408,9	NaN	NaN	FALSE		8,17E+18	NaN	NaN	NaN	0	37,01	44	10	25	10	405	44,5	6,7	2435,64	21,92	7	10	P32929	Cystathionine gamma-lyase OS=Homo sapiens OX=9606 GN=CTH PE=1 SV=3	0	Pf01053	1491	ENSG00000116761	CTH	B4E1R2;E9PDV0;hsa:1491;P32929;Q53FB3;Q53Y79;Q9H4W7;Q9H4W8
2233250	1436830	1246020	NaN	NaN	122030	FALSE		5,56E+18	NaN	NaN	NaN	0	37,008	20	6	26	6	421	49,5	5,59	2249,14	48,76	4	6	Q99983	Osteomodulin OS=Homo sapiens OX=9606 GN=OMD PE=1 SV=1	0	Pf13855	4958	ENSG00000127083	OMD	hsa:4958;Q5TBF4;Q99983
3690920	165344	3470990	787485	516045	5705,51	FALSE		-4,83E+18	NaN	NaN	NaN	0	36,908	37	7	38	7	304	33,8	5,55	4333,38	43,36	6	7	P46108	Adapter molecule crk OS=Homo sapiens OX=9606 GN=CRK PE=1 SV=2	0	Pf00017, Pf00018, Pf07653	1398	ENSG00000167193	CRK	A8MWE8;B0LPE8;D3DTH6;hsa:1398;P46108;Q96GA9;Q96HJ0
1395220	776771	1418480	447686	306886	18278,7	FALSE		-3,41E+18	NaN	NaN	NaN	0	36,894	18	6	16	6	689	78,8	6,05	1606,2	32,38	2	6	P52888	Thimet oligopeptidase OS=Homo sapiens OX=9606 GN=THOP1 PE=1 SV=2	0	Pf01432	7064	ENSG00000172009	THOP1	B3KSE2;hsa:7064;P52888;Q9UCB3
2844560	809472	1228400	NaN	257668	81929,8	FALSE		4,97E+18	NaN	NaN	NaN	0	36,889	52	7	27	7	231	25,9	6,29	3020,35	33,74	4	7	P16083	Ribosyldihydronicotinamide dehydrogenase [quinone] OS=Homo sapiens OX=9606 GN=NQO2 PE=1 SV=5	0	Pf02525	4835	ENSG00000124588	NQO2	B2R492;hsa:4835;P16083;Q5TD04
103705	179585	104757	343438	282756	145800	FALSE	Met-loss+Acetyl [N-Term]	9,26E+16	NaN	NaN	NaN	0	36,875	24	10	53	2	434	49,7	6,67	4813,16	50,58	8	10	Q14141	Septin-6 OS=Homo sapiens OX=9606 GN=SEPTIN6 PE=1 SV=4	0	Pf00735	23157	ENSG00000125354	SEPTIN6	hsa:23157;Q14141;Q5JTK0;Q969W5;Q96A13;Q96GR1;Q96P86;Q96P87
4168620	738328	2670260	728367	325463	191654	FALSE		3,25E+18	NaN	NaN	NaN	0	36,838	25	6	45	6	475	53,5	9,09	3735,61	65,32	3	6	P26368	Splicing factor U2AF 65 kDa subunit OS=Homo sapiens OX=9606 GN=U2AF2 PE=1 SV=4	0	Pf00076	11338	ENSG00000063244	U2AF2	hsa:11338;P26368;Q96HC5
2860990	2232100	2326840	2047860	1771600	736407	FALSE	Acetyl [N-Term];Met-loss+Acetyl [N-Term]	6,37E+17	NaN	NaN	NaN	0	36,83	29	10	86	8	363	39,6	4,58	6996,72	84,57	8	9	P54725	UV excision repair protein RAD23 homolog A OS=Homo sapiens OX=9606 GN=RAD23A PE=1 SV=1	0	Pf00240, Pf00627, Pf09280	5886	ENSG00000179262	RAD23A	hsa:5886;K7ESE3;P54725;Q59EU8;Q5M7Z1
532368	2257930	2415860	906933	758643	287963	FALSE		-9E+18	NaN	NaN	NaN	0	36,824	23	5	29	5	358	40,5	6,18	2932,57	35,67	4	5	Q9UBS4	DnaJ homolog subfamily B member 11 OS=Homo sapiens OX=9606 GN=DNAJB11 PE=1 SV=1	0	Pf00226, Pf01556	51726	ENSG00000090520	DNAJB11	hsa:51726;Q542Y5;Q542Y9;Q6IAQ8;Q96JC6;Q9UBS4
1688880	87857,1	2125610	110704	95584,9	16541,1	FALSE		2,56E+18	NaN	NaN	NaN	0	36,762	13	7	32	7	791	88,8	7,3	3766,4	34,06	6	7	O95479	GDH/6PGL endoplasmic bifunctional protein OS=Homo sapiens OX=9606 GN=H6PD PE=1 SV=2	0	Pf00479, Pf01182, Pf02781	9563	ENSG00000049239	H6PD	hsa:9563;O95479;Q4TT33;Q66I35;Q68DT3;R4GMU1
4701160	2038540	7981190	563132	611489	32969,7	FALSE		7,8E+18	NaN	NaN	NaN	0	36,687	17	5	41	5	419	48,2	6,15	5316,88	48,4	4	5	P14324	Farnesyl pyrophosphate synthase OS=Homo sapiens OX=9606 GN=FDPS PE=1 SV=4	0	Pf00348	2224	ENSG00000160752	FDPS	D3DV91;E9PCI9;hsa:2224;P14324;Q96G29
1362560	695932	1338680	35946400	121113000	1835110	FALSE		2,95E+18	NaN	NaN	NaN	0	36,462	42	4	44	2	120	13,2	8,51	4333,47	82,53	2	4	P06310	Immunoglobulin kappa variable 2-30 OS=Homo sapiens OX=9606 GN=IGKV2-30 PE=3 SV=2	2	Pf07686		ENSG00000243238;ENSG00000281933	IGKV2-30	A0A075B6S3;P06310
631579	NaN	533629	6014530	4010590	NaN	FALSE		4,65E+17	NaN	NaN	NaN	0	36,287	59	5	44	5	108	11,4	6,86	5769,87	58,51	5	5	Q9HD89	Resistin OS=Homo sapiens OX=9606 GN=RETN PE=1 SV=1	0	Pf06954	56729	ENSG00000104918	RETN	D6W649;hsa:56729;Q540D9;Q76B53;Q9HD89
4027670	785806	3381580	741768	522362	164491	FALSE		-6,27E+18	NaN	NaN	NaN	0	36,276	29	5	35	5	261	28,9	4,78	2989,82	58,09	3	5	Q9UHY7	Enolase-phosphatase E1 OS=Homo sapiens OX=9606 GN=ENOPH1 PE=1 SV=1	0		58478	ENSG00000145293	ENOPH1	hsa:58478;Q7Z4C5;Q9BVC2;Q9UHY7
10760,1	2345800	10389	NaN	501906	NaN	FALSE		5,63E+17	NaN	NaN	NaN	0	36,234	49	10	27	7	218	25,7	6,7	2891,32	17,53	10	10	P09488	Glutathione S-transferase Mu 1 OS=Homo sapiens OX=9606 GN=GSTM1 PE=1 SV=3	0	Pf02798, Pf14497	2944	ENSG00000134184	GSTM1	hsa:2944;P09488;Q5GHG0;Q6FH88;Q8TC98;Q9UC96
715494	2099770	819514	NaN	NaN	42433	FALSE		-6,78E+18	NaN	NaN	NaN	0	36,209	26	8	16	8	551	60,5	6,65	1265,14	25,38	4	7	P35520	Cystathionine beta-synthase OS=Homo sapiens OX=9606 GN=CBS PE=1 SV=2	0	Pf00291, Pf00571	102724560;875	ENSG00000160200	CBS	B2R993;D3DSK4;hsa:102724560;hsa:875;P35520;Q99425;Q9BWC5
562289	186994	612666	5646710	3939440	1059090	FALSE		-6,54E+18	NaN	NaN	NaN	0	36,161	22	7	53	7	369	39,2	9,83	5177,13	54,93	7	7	O75367	Core histone macro-H2A.1 OS=Homo sapiens OX=9606 GN=MACROH2A1 PE=1 SV=5	0	Pf00125, Pf01661, Pf16211	100394084;100974858;100998964;101050376;101131222;102123677;105467125;105506940;105599793;105706810;105816031;108307120;462076;711836	ENSANAG00000028147;ENSCANG00000022762;ENSCATG00000036866;ENSCCAG00000007999;ENSCJAG00000005818;ENSGGOG00000001707;ENSMFAG00000003059;ENSMICG00000005677;ENSMLEG00000037795;ENSMNEG00000031666;ENSPANG00000002758;ENSPCOG00000013464;ENSPPAG00000029258;ENSPPYG00000015799;ENSPSMG00000021213;ENSPTRG00000017256;ENSRROG00000045755;ENSSBOG00000034640;ENSSVLG00005008251;ENSTGEG00000021330	H2AFY;LOC105869993;LOC112625777;LOC116529369;MACROH2A1	A0A2I2YR16;A0A2I3NIP0;A0A2I3RFX3;A0A2J8LRL7;A0A2J8VQ78;A0A2K5DIR0;A0A2K5HRE4;A0A2K5MP29;A0A2K5PCJ5;A0A2K5W7P1;A0A2K5ZHJ2;A0A2K6BUU7;A0A2K6EU19;A0A2K6RXI8;A0A2K6UYW8;A0A2R9A5J2;A0A5S6RBH4;A0A6J3FDB1;A0A8B7G5Y8;A0A8C9AKM4;A0A8D2B7J1;A0A8D2FVN6;cjc:100394084;F7IAS0;H2PGL4;I2CUF0
5139670	191455	4527170	1358870	1412390	15288,4	FALSE		1,05E+18	NaN	NaN	NaN	0	36,095	18	8	53	8	611	69,1	5,73	2749,6	67,55	6	8	P23588	Eukaryotic translation initiation factor 4B OS=Homo sapiens OX=9606 GN=EIF4B PE=1 SV=2	0	Pf00076	1975	ENSG00000063046	EIF4B	B4DS13;hsa:1975;P23588;Q4G0E3;Q53HQ2;Q6GPH5;Q6IB46;Q8WYK5
3335180	156539	4663320	2633460	3057810	34739,8	FALSE		2,72E+17	NaN	NaN	NaN	0	36,089	36	8	54	8	234	26,1	7,78	4188,82	76,46	6	8	Q14696	LRP chaperone MESD OS=Homo sapiens OX=9606 GN=MESD PE=1 SV=2	0	Pf10185	23184	ENSG00000117899	MESD	B4DW84;D3DW96;hsa:23184;Q14696;Q969U1
2133560	3060660	1544470	485252	549079	NaN	FALSE		8,62E+18	NaN	NaN	NaN	0	36,003	78	4	29	4	85	9,1	9,31	3405,65	36,07	3	4	P61960	Ubiquitin-fold modifier 1 OS=Homo sapiens OX=9606 GN=UFM1 PE=1 SV=1	0	Pf03671	51569	ENSG00000120686	UFM1	hsa:51569;P61960;Q14346;Q5VXS0;Q6IAG6;Q9CPX2;Q9NZF2
4370710	1482190	4615940	3812120	2377690	344970	FALSE	Acetyl [N-Term];Met-loss+Acetyl [N-Term]	1,52E+18	NaN	NaN	NaN	0	35,949	40	10	60	10	228	26,2	8,25	6117,11	57,04	8	9	Q9HB71	Calcyclin-binding protein OS=Homo sapiens OX=9606 GN=CACYBP PE=1 SV=2	0	Pf04969, Pf05002, Pf09032	27101	ENSG00000116161	CACYBP	B2ZWH2;B3KSF1;hsa:27101;O60666;Q5R370;Q5R371;Q9HB71
814286	693747	1290430	NaN	NaN	NaN	FALSE		-7,97E+18	NaN	NaN	NaN	0	35,88	28	7	19	7	443	51,6	5,53	1567,07	25,4	5	7	P61201	COP9 signalosome complex subunit 2 OS=Homo sapiens OX=9606 GN=COPS2 PE=1 SV=1	0	Pf01399	9318	ENSG00000166200	COPS2	hsa:9318;O88950;P61201;Q15647;Q6FGP4;Q9BY54;Q9R249;Q9UNI2;Q9UNQ5
1832110	117659	1793980	940387	680778	43255,2	FALSE		2,19E+18	NaN	NaN	NaN	0	35,876	23	6	31	6	338	38,3	5,53	2964,41	44,89	4	6	O95433	Activator of 90 kDa heat shock protein ATPase homolog 1 OS=Homo sapiens OX=9606 GN=AHSA1 PE=1 SV=1	0	Pf08327, Pf09229	10598	ENSG00000100591	AHSA1	B2R9L2;B4DUR9;hsa:10598;O95433;Q96IL6;Q9P060
NaN	NaN	NaN	6897200	6052630	NaN	FALSE		-5,48E+17	NaN	NaN	NaN	0	35,823	18	3	16	3	336	38,6	7,94	2326,4	40,39	2	3	Q15762	CD226 antigen OS=Homo sapiens OX=9606 GN=CD226 PE=1 SV=2	0	Pf07686	10666	ENSG00000150637	CD226	B2R818;hsa:10666;Q15762
2831200	306406	2671060	1003770	409414	47659	FALSE		-8,74E+18	NaN	NaN	NaN	0	35,766	39	7	46	7	228	26,2	6,44	3654,72	39,74	6	7	Q15631	Translin OS=Homo sapiens OX=9606 GN=TSN PE=1 SV=1	0	Pf01997	7247	ENSG00000211460	TSN	B7Z3X8;hsa:7247;Q15631;Q5U0K7
1832340	223791	1886470	NaN	15401,9	12734,5	FALSE		6,33E+17	NaN	NaN	NaN	0	35,752	10	5	29	5	1074	120,5	7,21	2725,63	50,7	2	5	Q13591	Semaphorin-5A OS=Homo sapiens OX=9606 GN=SEMA5A PE=1 SV=3	0	Pf00090, Pf01403	9037	ENSG00000112902	SEMA5A	D3DTC6;hsa:9037;O60408;Q13591;Q1RLL9
672091	464660	1196390	306935	174131	NaN	FALSE		-2,64E+18	NaN	NaN	NaN	0	35,713	33	8	25	8	456	52,9	7,65	1826,98	14,14	5	8	O00232	26S proteasome non-ATPase regulatory subunit 12 OS=Homo sapiens OX=9606 GN=PSMD12 PE=1 SV=3	0	Pf01399, Pf18098	5718	ENSG00000197170	PSMD12	A6NP15;hsa:5718;O00232;Q53HA2;Q6P053
1019960	859113	1240640	262578	191767	32044,3	FALSE	Acetyl [N-Term];Met-loss+Acetyl [N-Term]	-3,69E+18	NaN	NaN	NaN	0	35,666	30	9	39	7	521	57,8	4,94	2848,44	23,67	5	8	O00505	Importin subunit alpha-4 OS=Homo sapiens OX=9606 GN=KPNA3 PE=1 SV=2	2	Pf00514, Pf01749, Pf16186	3839	ENSG00000102753	KPNA3	hsa:3839;O00191;O00505;O43195;Q5JVM9;Q8IYQ9;Q96AA7
385611	29372,7	352057	8046960	8522030	344987	FALSE		-7,85E+18	NaN	NaN	NaN	0	35,631	22	4	69	4	311	32,7	6,05	7608,22	97,13	3	4	Q86YW5	Trem-like transcript 1 protein OS=Homo sapiens OX=9606 GN=TREML1 PE=1 SV=2	0		340205	ENSG00000161911	TREML1	hsa:340205;Q496B3;Q86YW5;Q8IWY1;Q8IWY2
209750	1705850	160655	45333,3	28405,8	89194,6	FALSE	Met-loss [N-Term]	1,71E+18	NaN	NaN	NaN	0	35,579	32	6	14	6	136	14,6	10,04	1553,08	6,54	4	4	P37108	Signal recognition particle 14 kDa protein OS=Homo sapiens OX=9606 GN=SRP14 PE=1 SV=2	0	Pf02290	6727	ENSG00000140319	SRP14	B5BUF5;hsa:6727;P37108;Q6B0K5;Q96Q14
1657920	1254940	2247430	203884	124916	NaN	FALSE		-2,06E+18	NaN	NaN	NaN	0	35,559	12	7	35	7	796	91,6	5,49	5077,1	49,96	7	7	Q96QK1	Vacuolar protein sorting-associated protein 35 OS=Homo sapiens OX=9606 GN=VPS35 PE=1 SV=2	0	Pf03635	55737	ENSG00000069329	VPS35	hsa:55737;Q561W2;Q96QK1;Q9H016;Q9H096;Q9H4P3;Q9H8J0;Q9NRS7;Q9NVG2;Q9NX80;Q9NZK2
855115	25115,4	827022	967595	626835	9991,27	FALSE	Acetyl [N-Term];Met-loss+Acetyl [N-Term]	8,25E+18	NaN	NaN	NaN	0	35,529	18	9	32	5	340	37,3	6	2228,25	19,02	6	7	P62879	Guanine nucleotide-binding protein G(I)/G(S)/G(T) subunit beta-2 OS=Homo sapiens OX=9606 GN=GNB2 PE=1 SV=3	0	Pf00400	2783	ENSG00000172354	GNB2	B3KPU1;hsa:2783;P11016;P54312;P62879
23776,7	NaN	43838,6	NaN	599861	NaN	FALSE		-4,63E+18	NaN	NaN	NaN	0	35,522	41	6	38	2	180	20,5	7,14	3755,96	73,14	5	6	P18085	ADP-ribosylation factor 4 OS=Homo sapiens OX=9606 GN=ARF4 PE=1 SV=3	0	Pf00025	378	ENSG00000168374	ARF4	B2R7J7;hsa:378;P18085;P21371
1547260	1845010	2920540	397591	205872	162011	FALSE	Met-loss+Acetyl [N-Term]	-1,76E+18	NaN	NaN	NaN	0	35,483	40	7	44	6	285	29,6	6,01	3935,34	37,98	6	7	O95865	N(G),N(G)-dimethylarginine dimethylaminohydrolase 2 OS=Homo sapiens OX=9606 GN=DDAH2 PE=1 SV=1	0		23564	ENSG00000206395;ENSG00000213722;ENSG00000225635;ENSG00000226634;ENSG00000227317;ENSG00000228128;ENSG00000233076	DDAH2	A2BEZ7;hsa:23564;O95865
1184250	780854	241578	17653,9	22540,7	2439,36	FALSE		1,71E+18	NaN	NaN	NaN	0	35,453	35	9	24	9	386	43,5	8,19	1425,94	14,5	8	9	Q6NVY1	3-hydroxyisobutyryl-CoA hydrolase, mitochondrial OS=Homo sapiens OX=9606 GN=HIBCH PE=1 SV=2	0	Pf16113	26275	ENSG00000198130	HIBCH	D3DPI4;hsa:26275;Q53GA8;Q53GF2;Q53RF7;Q53TC6;Q6NVY1;Q92931;Q9BS94
19767,5	72189,5	40555,1	3900530	2942470	151014	FALSE		8,1E+18	NaN	NaN	NaN	0	35,426	29	6	34	6	271	28,6	5,41	4482,23	38,55	6	6	Q9BWP8	Collectin-11 OS=Homo sapiens OX=9606 GN=COLEC11 PE=1 SV=1	0	Pf00059, Pf01391	78989	ENSG00000118004	COLEC11	A1IGE4;A1IGE5;A1IGE6;A7VJJ2;A7VJJ3;A7VJJ4;A7VJJ5;B2R9M5;B4E1G0;hsa:78989;J3KQY9;Q5CZ85;Q7Z6N1;Q9BWP8
4876880	11126100	5787790	NaN	NaN	18650,3	FALSE		1,92E+18	NaN	NaN	NaN	0	35,342	42	6	55	6	173	19,6	5,94	6929,7	85,43	6	6	Q13361	Microfibrillar-associated protein 5 OS=Homo sapiens OX=9606 GN=MFAP5 PE=1 SV=1	0	Pf05507	8076	ENSG00000197614	MFAP5	B0AZL6;D3DUV1;hsa:8076;Q13361;Q7Z490
256931	1691870	477237	234879	121843	NaN	FALSE	Acetyl [N-Term];Met-loss+Acetyl [N-Term]	-5,99E+18	NaN	NaN	NaN	0	35,327	15	5	6	5	606	64,9	9,32	573,89	15,59	2	4	Q9UNF1	Melanoma-associated antigen D2 OS=Homo sapiens OX=9606 GN=MAGED2 PE=1 SV=2	0	Pf01454	10916	ENSG00000102316	MAGED2	A6NMX0;hsa:10916;O76058;Q5BJF3;Q8NAL6;Q9H218;Q9P0U9;Q9UM52;Q9UNF1
NaN	608776	NaN	1097870	648142	1382730	FALSE	Acetyl [N-Term];Met-loss [N-Term];Met-loss+Acetyl [N-Term]	-2,77E+18	NaN	NaN	NaN	0	35,302	10	5	14	5	326	36,1	9,16	1714,01	15,27	3	3	O75190	DnaJ homolog subfamily B member 6 OS=Homo sapiens OX=9606 GN=DNAJB6 PE=1 SV=2	0	Pf00226	10049	ENSG00000105993	DNAJB6	A4D232;A8K7D8;A8KAG0;B4DN73;E9PCZ2;hsa:10049;O75190;O95806;Q53EN8;Q59EF2;Q6FIC8;Q75MA2;Q9UIK6
304264	1079790	452823	NaN	NaN	NaN	FALSE	Acetyl [N-Term];Met-loss+Acetyl [N-Term]	-2,97E+18	NaN	NaN	NaN	0	35,288	26	7	14	7	246	28,1	6,77	1329,48	13,22	5	6	O15305	Phosphomannomutase 2 OS=Homo sapiens OX=9606 GN=PMM2 PE=1 SV=1	0	Pf03332	5373	ENSG00000140650	PMM2	A8K672;B7Z6R0;D3DUF3;hsa:5373;O15305
2803330	368017	2584820	313516	145907	12752,7	FALSE		9,85E+17	NaN	NaN	NaN	0	35,128	28	3	30	3	144	16,3	5,03	2903,73	55,36	2	3	Q9Y547	Intraflagellar transport protein 25 homolog OS=Homo sapiens OX=9606 GN=HSPB11 PE=1 SV=1	0	Pf00754	51668	ENSG00000081870	HSPB11	A6NG57;D3DQ45;hsa:51668;Q9Y547;Q9Y684
1840530	71243,6	729482	69001,9	40469	5088,24	FALSE		2,95E+18	NaN	NaN	NaN	0	35,035	15	7	32	7	743	82,2	6,65	2948,56	30,03	5	7	P54802	Alpha-N-acetylglucosaminidase OS=Homo sapiens OX=9606 GN=NAGLU PE=1 SV=2	0	Pf05089, Pf12971, Pf12972	4669	ENSG00000108784	NAGLU	hsa:4669;P54802
1365100	212597	801506	25184	NaN	NaN	FALSE		-2,72E+17	NaN	NaN	NaN	0	34,976	10	6	14	5	1089	122,6	5,17	409,93	31,56	2	6	P16234	Platelet-derived growth factor receptor alpha OS=Homo sapiens OX=9606 GN=PDGFRA PE=1 SV=1	0	Pf07679, Pf07714	5156	ENSG00000134853	PDGFRA	B2RE69;E9PBH0;hsa:5156;P16234;Q6P4H5;Q96KZ7;Q9UD28
4716190	914506	5677550	78917,9	47115,2	NaN	FALSE		-7,24E+18	NaN	NaN	NaN	0	34,924	47	8	31	8	244	28,1	6,65	3821,45	34,42	6	8	Q9Y224	RNA transcription, translation and transport factor protein OS=Homo sapiens OX=9606 GN=RTRAF PE=1 SV=1	0	Pf10036	51637	ENSG00000087302	RTRAF	hsa:51637;Q9Y224
578731	471224	567053	54719,8	28214	10494,5	FALSE		6,67E+18	NaN	NaN	NaN	0	34,909	23	6	27	6	411	46,5	5,19	2924,86	16,72	6	6	P17050	Alpha-N-acetylgalactosaminidase OS=Homo sapiens OX=9606 GN=NAGA PE=1 SV=2	0	Pf16499, Pf17450	4668	ENSG00000198951	NAGA	hsa:4668;P17050
55603,3	NaN	79836,2	2679160	2404920	191664	FALSE		-6,79E+18	NaN	NaN	NaN	0	34,861	34	7	40	7	229	26,6	8,5	4263,21	33,32	6	7	Q9P126	C-type lectin domain family 1 member B OS=Homo sapiens OX=9606 GN=CLEC1B PE=1 SV=2	0	Pf00059	51266	ENSG00000165682	CLEC1B	hsa:51266;Q6UWX7;Q8NHR6;Q9P126
772280	100338	1036100	1265970	955907	534876	FALSE		2,67E+18	NaN	NaN	NaN	0	34,85	23	8	37	5	536	59,8	7,42	2865,45	31,53	6	8	P12931	Proto-oncogene tyrosine-protein kinase Src OS=Homo sapiens OX=9606 GN=SRC PE=1 SV=3	2	Pf00017, Pf00018, Pf07714	6714	ENSG00000197122	SRC	E1P5V4;hsa:6714;P12931;Q76P87;Q86VB9;Q9H5A8
1342350	80208,1	1580730	288505	118803	NaN	FALSE		-7,44E+18	NaN	NaN	NaN	0	34,804	29	5	19	5	327	36,1	5,73	1228,96	38,55	2	5	Q7L5N1	COP9 signalosome complex subunit 6 OS=Homo sapiens OX=9606 GN=COPS6 PE=1 SV=1	0	Pf01398, Pf13012	10980	ENSG00000168090	COPS6	A4D2A3;hsa:10980;O15387;Q7L5N1
5445380	NaN	7997020	1680150	3770560	NaN	FALSE		8,82E+18	NaN	NaN	NaN	0	34,803	19	6	52	6	2040	226,4	6,07	7065,95	71,17	6	6	P08519	Apolipoprotein(a) OS=Homo sapiens OX=9606 GN=LPA PE=1 SV=2	0	Pf00051, Pf00089		ENSG00000198670	LPA	P08519;Q5VTD7;Q9UD88
810563	1038450	861126	NaN	NaN	NaN	FALSE		9,05E+18	NaN	NaN	NaN	0	34,741	22	5	14	5	354	38,7	6,21	1517,04	17,19	4	5	Q7Z3B1	Neuronal growth regulator 1 OS=Homo sapiens OX=9606 GN=NEGR1 PE=1 SV=3	0	Pf07679, Pf13927	257194	ENSG00000172260	NEGR1	hsa:257194;Q5VT21;Q6UY06;Q7Z3B1;Q8N440;Q8NAQ3
332835	380044	140234	1828440	1996290	133054	FALSE		1,07E+18	NaN	NaN	NaN	0	34,729	28	10	31	10	444	50,7	8,27	2389,78	26,77	8	10	Q9UK55	Protein Z-dependent protease inhibitor OS=Homo sapiens OX=9606 GN=SERPINA10 PE=1 SV=1	0	Pf00079	51156	ENSG00000140093;ENSG00000278767	SERPINA10	A5Z2A5;hsa:51156;Q6UWX9;Q86U20;Q9UK55
1027870	1018250	970208	135754	62812	NaN	FALSE	Acetyl [N-Term];Met-loss+Acetyl [N-Term]	-6,74E+18	NaN	NaN	NaN	0	34,72	14	10	24	10	889	98,3	6,68	2022,94	12,53	7	9	P21399	Cytoplasmic aconitate hydratase OS=Homo sapiens OX=9606 GN=ACO1 PE=1 SV=3	0	Pf00330, Pf00694	48	ENSG00000122729	ACO1	D3DRK7;hsa:48;P21399;Q14652;Q5VZA7
509726	NaN	996282	12175,7	17719,2	NaN	FALSE		-6,55E+18	NaN	NaN	NaN	0	34,702	8	5	20	5	952	105,3	6	2665,61	25,37	4	5	P10253	Lysosomal alpha-glucosidase OS=Homo sapiens OX=9606 GN=GAA PE=1 SV=4	0	Pf00088, Pf01055, Pf13802, Pf16863	2548	ENSG00000171298	GAA	hsa:2548;P10253;Q09GN4;Q14351;Q16302;Q8IWE7
149200	419282	332214	1888640	2424520	103760	FALSE		8,41E+18	NaN	NaN	NaN	0	34,678	13	10	36	10	907	102,3	7,14	2259,85	34,83	7	10	P78344	Eukaryotic translation initiation factor 4 gamma 2 OS=Homo sapiens OX=9606 GN=EIF4G2 PE=1 SV=1	0	Pf02020, Pf02847, Pf02854	1982	ENSG00000110321	EIF4G2	hsa:1982;O60877;P78344;P78404;Q0VH00;Q0VH01;Q2NKW9;Q49A79;Q53EU1;Q58EZ2;Q8NI71;Q96C16
1136950	29980,3	2258150	23160500	44240900	NaN	FALSE		6,03E+18	NaN	NaN	NaN	0	34,641	38	5	56	5	130	14,7	9,07	6722,28	66,62	5	5	P35542	Serum amyloid A-4 protein OS=Homo sapiens OX=9606 GN=SAA4 PE=1 SV=2	0	Pf00277	6291	ENSG00000148965	SAA4	hsa:6291;P35542;Q6FHJ4
283423	NaN	496395	NaN	NaN	NaN	FALSE		-6,72E+18	NaN	NaN	NaN	0	34,636	18	7	37	1	372	40,1	9,77	3111,69	29,58	7	7	P16989	Y-box-binding protein 3 OS=Homo sapiens OX=9606 GN=YBX3 PE=1 SV=4	0	Pf00313	8531	ENSG00000060138	YBX3	B2RBW6;hsa:8531;P16989;Q14121;Q969N6;Q96B76
2039390	5242490	2540870	2265690	4286890	206036	FALSE		5,05E+18	NaN	NaN	NaN	0	34,615	27	9	52	9	229	25,2	4,64	5779,97	61,19	9	9	P09497	Clathrin light chain B OS=Homo sapiens OX=9606 GN=CLTB PE=1 SV=1	0	Pf01086	1212	ENSG00000175416	CLTB	hsa:1212;P09497;Q53Y37;Q6FHW1
1243770	1493540	5771820	NaN	NaN	NaN	FALSE		-8,45E+18	NaN	NaN	NaN	0	34,567	36	6	25	6	143	15,6	9,79	2850,53	35,93	5	6	P21741	Midkine OS=Homo sapiens OX=9606 GN=MDK PE=1 SV=1	0	Pf01091, Pf05196	4192	ENSG00000110492	MDK	hsa:4192;P21741;Q2LEK4;Q9UCC7
990912	4085760	1718230	496373	1196900	NaN	FALSE		-3,53E+18	NaN	NaN	NaN	0	34,548	56	6	24	6	112	12,5	4,78	3029,08	26,11	5	6	Q15369	Elongin-C OS=Homo sapiens OX=9606 GN=ELOC PE=1 SV=1	0	Pf03931	6921	ENSG00000154582	ELOC	E5RGD9;hsa:6921;Q15369;Q567Q6
2386100	3502330	5076960	5213540	3565250	633959	FALSE		5,59E+18	NaN	NaN	NaN	0	34,509	38	7	49	6	192	21,4	8,5	5250,86	51,48	6	7	P63000	Ras-related C3 botulinum toxin substrate 1 OS=Homo sapiens OX=9606 GN=RAC1 PE=1 SV=1	1	Pf00071	5879	ENSG00000136238	RAC1	hsa:5879;O95501;P15154;P63000;Q3Y4D3;Q5JAA8;Q9BTB4
865142	1085310	1040030	50034,2	111036	7295,33	FALSE		-5,83E+18	NaN	NaN	NaN	0	34,323	31	4	12	4	255	28,6	5,63	1113,58	36,88	1	4	P55083	Microfibril-associated glycoprotein 4 OS=Homo sapiens OX=9606 GN=MFAP4 PE=1 SV=2	0	Pf00147	4239	ENSG00000166482	MFAP4	A8KAJ1;A8MVM2;B4E317;hsa:4239;P55083;Q6P680
140874	101500	176696	41716,5	26588,9	20115,8	FALSE		-6,33E+18	NaN	NaN	NaN	0	34,297	33	6	35	1	309	35,6	5,54	1547,71	34,53	3	6	P67775	Serine/threonine-protein phosphatase 2A catalytic subunit alpha isoform OS=Homo sapiens OX=9606 GN=PPP2CA PE=1 SV=1	0	Pf00149	5515	ENSG00000113575	PPP2CA	hsa:5515;P05323;P13197;P67775
989251	1645260	5496060	82236,4	656159	NaN	FALSE		-5,61E+18	NaN	NaN	NaN	0	34,153	8	7	26	7	931	103,1	6,1	2490,25	26,68	5	7	O95185	Netrin receptor UNC5C OS=Homo sapiens OX=9606 GN=UNC5C PE=1 SV=2	0	Pf00090, Pf00531, Pf00791, Pf07679, Pf17217	8633	ENSG00000182168	UNC5C	hsa:8633;O95185;Q8IUT0
2998430	NaN	3447400	NaN	368697	NaN	TRUE		6,07E+18	NaN	NaN	NaN	0	34,074	23	7	43	6	460	52,3	7,53	3240,79	41,81	5	7	Q3SZV7	TREMBL:Q3SZV7 (Bos taurus) Similar to hemopexin	0
570340	NaN	492042	798908	532564	10422,1	FALSE		-8,81E+18	NaN	NaN	NaN	0	34,056	14	6	37	6	601	68,3	5,73	3355,33	47,07	3	6	Q15642	Cdc42-interacting protein 4 OS=Homo sapiens OX=9606 GN=TRIP10 PE=1 SV=3	0	Pf00018, Pf00611	9322	ENSG00000125733	TRIP10	B2R8A6;B7WP22;D6W645;hsa:9322;O15184;Q15642;Q53G22;Q5TZN1;Q6FI24;Q8NFL1;Q8TCY1;Q8TDX3;Q96RJ1
NaN	NaN	NaN	103273	210076	NaN	FALSE		-1,89E+18	NaN	NaN	NaN	0	34,045	38	4	60	1	117	12,8	8,28	5987,52	90,51	3	4	A0A0B4J1V1	Immunoglobulin heavy variable 3-21 OS=Homo sapiens OX=9606 GN=IGHV3-21 PE=1 SV=1	0	Pf07686		ENSG00000211947;ENSG00000282281	IGHV3-21	A0A0B4J1V1
1263630	591576	1927360	57035,5	43085,3	31219,6	FALSE		-7,38E+18	NaN	NaN	NaN	0	33,899	8	6	23	6	1217	135,5	5,26	3117,53	27,04	6	6	Q15393	Splicing factor 3B subunit 3 OS=Homo sapiens OX=9606 GN=SF3B3 PE=1 SV=4	0	Pf03178, Pf10433	23450	ENSG00000189091	SF3B3	hsa:23450;Q15393;Q6NTI8;Q96GC0;Q9BPY2;Q9UFX7;Q9UJ29
1975130	3190480	3965790	3583320	18001700	5588770	FALSE		1,04E+18	NaN	NaN	NaN	0	33,858	43	4	21	4	117	12,2	7,03	983,25	37,51	2	4	P01701	Immunoglobulin lambda variable 1-51 OS=Homo sapiens OX=9606 GN=IGLV1-51 PE=1 SV=2	0	Pf07686		ENSG00000211644	IGLV1-51	A0A075B6I5;P01701;P01702;P06316;P06888
371778	80403,6	204955	1077350	863156	NaN	FALSE	Met-loss+Acetyl [N-Term]	-5,89E+18	NaN	NaN	NaN	0	33,832	23	6	25	6	482	49,9	5,53	2507,18	29,52	5	6	P19971	Thymidine phosphorylase OS=Homo sapiens OX=9606 GN=TYMP PE=1 SV=2	0	Pf00591, Pf02885, Pf07831	1890	ENSG00000025708	TYMP	A8MW15;H9KVA0;hsa:1890;P19971;Q13390;Q8WVB7
[truncated: 1,951 more rows]

## Sheet: All data before filtration
BMSC-CM: Donor 1	BMSC-CM: Donor 2	BMSC-CM: Donor 3	PRF-CM: Donor 1	PRF-CM: Donor 2	PRF-CM: Donor 3	C: Contaminant	C: Modifications	N: Proteins Unique Sequence ID	N: Checked	N: Protein FDR Confidence: Combined	N: Master	N: Exp. q-value: Combined	N: Sum PEP Score	N: Coverage [%]	N: # Peptides	N: # PSMs	N: # Unique Peptides	N: # AAs	N: MW [kDa]	N: calc. pI	N: Score MS Amanda 2.0: MS Amanda 2.0	N: Score Sequest HT: Sequest HT	N: # Peptides (by Search Engine): MS Amanda 2.0	N: # Peptides (by Search Engine): Sequest HT	T: Accession	T: Description	T: # Razor Peptides	T: Pfam IDs	T: Entrez Gene ID	T: Ensembl Gene ID	T: Gene Symbol	T: Gene ID
[truncated: 3,141 more rows]

[truncated: 9 more sheets: All data after 100%  filtration, BMSC-CM donors, PRF-CM donors, Unique BMSC-CM, Uinque PRF-CM, Common CM proteins, BMSC-CM_Significants, PRF-CM_Significants, Sheet7]
